# Supplementary material for: Long Noncoding RNA FAM201A Mediates the Radiosensitivity of Esophageal Squamous Cell Cancer by Regulating ATM and mTOR Expression via miR-101
Source: Front Genet. 2018 Dec 5;9:611. doi: 10.3389/fgene.2018.00611 (PMC6292217; doi:10.3389/fgene.2018.00611)
Supplement: File S1 — Results of lncRNA chip microarray. [file Data_Sheet_1.ZIP]

Archive with 79 entries (62 files):
- Supplementary File/
- Supplementary File/Supplementary file 4--Validation of FAM201A  in vitro and vivo/
- Supplementary File/Supplementary file 4--Validation of FAM201A  in vitro and vivo/Supplementary file--Annexin-V  for cell apoptosis.xls
- __MACOSX/
- __MACOSX/Supplementary File/
- __MACOSX/Supplementary File/Supplementary file 4--Validation of FAM201A  in vitro and vivo/
- __MACOSX/Supplementary File/Supplementary file 4--Validation of FAM201A  in vitro and vivo/._Supplementary file--Annexin-V  for cell apoptosis.xls
- Supplementary File/Supplementary file 4--Validation of FAM201A  in vitro and vivo/.DS_Store
- __MACOSX/Supplementary File/Supplementary file 4--Validation of FAM201A  in vitro and vivo/._.DS_Store
- Supplementary File/Supplementary file 4--Validation of FAM201A  in vitro and vivo/Supplementary file--MTT for Eca109R cell radiation.xls
- __MACOSX/Supplementary File/Supplementary file 4--Validation of FAM201A  in vitro and vivo/._Supplementary file--MTT for Eca109R cell radiation.xls
- Supplementary File/Supplementary file 4--Validation of FAM201A  in vitro and vivo/Supplementary file--MTT for  Eca109 cell radiation.xls
- __MACOSX/Supplementary File/Supplementary file 4--Validation of FAM201A  in vitro and vivo/._Supplementary file--MTT for  Eca109 cell radiation.xls
- Supplementary File/Supplementary file 4--Validation of FAM201A  in vitro and vivo/Supplementary file--weight and volume  of xenograft mouse.xls
- __MACOSX/Supplementary File/Supplementary file 4--Validation of FAM201A  in vitro and vivo/._Supplementary file--weight and volume  of xenograft mouse.xls
- Supplementary File/Supplementary file 4--Validation of FAM201A  in vitro and vivo/Supplementary file--PCR transfection FAM201A in ECSS cell/
- Supplementary File/Supplementary file 4--Validation of FAM201A  in vitro and vivo/Supplementary file--PCR transfection FAM201A in ECSS cell/Supplementary file 6--PCR transfection FAM201A in Eca109R.xls
- Supplementary File/Supplementary file 4--Validation of FAM201A  in vitro and vivo/Supplementary file--PCR transfection FAM201A in ECSS cell/Supplementary file 5--PCR transfection FAM201A in Eca109 .xls
- __MACOSX/Supplementary File/Supplementary file 4--Validation of FAM201A  in vitro and vivo/Supplementary file--PCR transfection FAM201A in ECSS cell/
- __MACOSX/Supplementary File/Supplementary file 4--Validation of FAM201A  in vitro and vivo/Supplementary file--PCR transfection FAM201A in ECSS cell/._Supplementary file 5--PCR transfection FAM201A in Eca109 .xls
- Supplementary File/.DS_Store
- __MACOSX/Supplementary File/._.DS_Store
- Supplementary File/Supplementary file 2--Results of PCR of candidate lncRNAs/
- Supplementary File/Supplementary file 2--Results of PCR of candidate lncRNAs/CASC2.pzf
- __MACOSX/Supplementary File/Supplementary file 2--Results of PCR of candidate lncRNAs/
- __MACOSX/Supplementary File/Supplementary file 2--Results of PCR of candidate lncRNAs/._CASC2.pzf
- Supplementary File/Supplementary file 2--Results of PCR of candidate lncRNAs/.DS_Store
- __MACOSX/Supplementary File/Supplementary file 2--Results of PCR of candidate lncRNAs/._.DS_Store
- Supplementary File/Supplementary file 2--Results of PCR of candidate lncRNAs/PCR of three potential lncRNAs for further study.pptx
- __MACOSX/Supplementary File/Supplementary file 2--Results of PCR of candidate lncRNAs/._PCR of three potential lncRNAs for further study.pptx
- Supplementary File/Supplementary file 2--Results of PCR of candidate lncRNAs/DLEU2.pzf
- __MACOSX/Supplementary File/Supplementary file 2--Results of PCR of candidate lncRNAs/._DLEU2.pzf
- Supplementary File/Supplementary file 2--Results of PCR of candidate lncRNAs/Raw data of candidated lncRNA.xlsx
- __MACOSX/Supplementary File/Supplementary file 2--Results of PCR of candidate lncRNAs/._Raw data of candidated lncRNA.xlsx
- Supplementary File/Supplementary file 2--Results of PCR of candidate lncRNAs/MCF2L-AS1.pzf
- __MACOSX/Supplementary File/Supplementary file 2--Results of PCR of candidate lncRNAs/._MCF2L-AS1.pzf
- Supplementary File/Supplementary file 2--Results of PCR of candidate lncRNAs/FAM201A.pzf
- __MACOSX/Supplementary File/Supplementary file 2--Results of PCR of candidate lncRNAs/._FAM201A.pzf
- Supplementary File/Supplementary file 2--Results of PCR of candidate lncRNAs/Reports of qRT-PCR.doc
- __MACOSX/Supplementary File/Supplementary file 2--Results of PCR of candidate lncRNAs/._Reports of qRT-PCR.doc
- Supplementary File/Supplementary file 2--Results of PCR of candidate lncRNAs/DLX6-AS1.pzf
- __MACOSX/Supplementary File/Supplementary file 2--Results of PCR of candidate lncRNAs/._DLX6-AS1.pzf
- Supplementary File/Supplementary file 6/
- Supplementary File/Supplementary file 6/Supplementary file--over:si-FAM201A ATM:mTOR in Eca109R.xls
- Supplementary File/Supplementary file 6/Supplementary file--overe:si-FAM201A on miR101 in Eca109R.xls
- Supplementary File/Supplementary file 6/Supplementary file--over:si-FAM201A ATM:mTOR in Eca109.xls
- __MACOSX/Supplementary File/Supplementary file 6/
- __MACOSX/Supplementary File/Supplementary file 6/._Supplementary file--over:si-FAM201A ATM:mTOR in Eca109.xls
- Supplementary File/Supplementary file 6/Supplementary file--over:si-FAM201A on miR101 in Eca109.xls
- __MACOSX/Supplementary File/Supplementary file 6/._Supplementary file--over:si-FAM201A on miR101 in Eca109.xls
- Supplementary File/Supplementary file 3--FAM201A as a novel lncRNA with potential function in Radiosensitivity/
- Supplementary File/Supplementary file 3--FAM201A as a novel lncRNA with potential function in Radiosensitivity/Supplementaty file--clinical characters and lncRNAs.xlsx
- __MACOSX/Supplementary File/Supplementary file 3--FAM201A as a novel lncRNA with potential function in Radiosensitivity/
- __MACOSX/Supplementary File/Supplementary file 3--FAM201A as a novel lncRNA with potential function in Radiosensitivity/._Supplementaty file--clinical characters and lncRNAs.xlsx
- Supplementary File/Supplementary file 3--FAM201A as a novel lncRNA with potential function in Radiosensitivity/.DS_Store
- __MACOSX/Supplementary File/Supplementary file 3--FAM201A as a novel lncRNA with potential function in Radiosensitivity/._.DS_Store
- Supplementary File/Supplementary file 3--FAM201A as a novel lncRNA with potential function in Radiosensitivity/raw material for the remaining 35 patients.xlsx
- __MACOSX/Supplementary File/Supplementary file 3--FAM201A as a novel lncRNA with potential function in Radiosensitivity/._raw material for the remaining 35 patients.xlsx
- Supplementary File/Supplementary file 3--FAM201A as a novel lncRNA with potential function in Radiosensitivity/clinical data .sav
- __MACOSX/Supplementary File/Supplementary file 3--FAM201A as a novel lncRNA with potential function in Radiosensitivity/._clinical data .sav
- Supplementary File/Supplementary file 3--FAM201A as a novel lncRNA with potential function in Radiosensitivity/Supplementary file --Youden index.xlsx
- __MACOSX/Supplementary File/Supplementary file 3--FAM201A as a novel lncRNA with potential function in Radiosensitivity/._Supplementary file --Youden index.xlsx
- Supplementary File/Supplementary file 5--luciferase/
- Supplementary File/Supplementary file 5--luciferase/Supplementary file--luciferase activity of miR-101.xls
- __MACOSX/Supplementary File/Supplementary file 5--luciferase/
- __MACOSX/Supplementary File/Supplementary file 5--luciferase/._Supplementary file--luciferase activity of miR-101.xls
- Supplementary File/Supplementary file 5--luciferase/Supplementary file--luciferase activity of miR-590.xls
- Supplementary File/Supplementary file 1--Results of lncRNA chip microarray/
- Supplementary File/Supplementary file 1--Results of lncRNA chip microarray/.DS_Store
- __MACOSX/Supplementary File/Supplementary file 1--Results of lncRNA chip microarray/
- __MACOSX/Supplementary File/Supplementary file 1--Results of lncRNA chip microarray/._.DS_Store
- Supplementary File/Supplementary file 1--Results of lncRNA chip microarray/12002_2017_06_lncRNA analysis.xls
- __MACOSX/Supplementary File/Supplementary file 1--Results of lncRNA chip microarray/._12002_2017_06_lncRNA analysis.xls
- Supplementary File/Supplementary file 1--Results of lncRNA chip microarray/12002_2017_06_lncRNA raw-data.xls
- __MACOSX/Supplementary File/Supplementary file 1--Results of lncRNA chip microarray/._12002_2017_06_lncRNA raw-data.xls
- Supplementary File/Supplementary file 1--Results of lncRNA chip microarray/Heatmap.ppt
- __MACOSX/Supplementary File/Supplementary file 1--Results of lncRNA chip microarray/._Heatmap.ppt
- Supplementary File/Supplementary file 1--Results of lncRNA chip microarray/Heatmap.pdf
- __MACOSX/Supplementary File/Supplementary file 1--Results of lncRNA chip microarray/._Heatmap.pdf
