# Supplementary material for: Long Noncoding RNA FAM201A Mediates the Radiosensitivity of Esophageal Squamous Cell Cancer by Regulating ATM and mTOR Expression via miR-101
Source: Front Genet. 2018 Dec 5;9:611. doi: 10.3389/fgene.2018.00611 (PMC6292217; doi:10.3389/fgene.2018.00611)
Supplement: File S1 — Results of lncRNA chip microarray. [file Data_Sheet_1.ZIP › Supplementary File/Supplementary file 1--Results of lncRNA chip microarray/12002_2017_06_lncRNA analysis.xls]

## Sheet: lncRNA
ProbeName	FDR	P	FC(abs)	Mean signal intensities in sample 1	Mean signal intensities in sample 4	Mean signal intensities in sample 5	Mean signal intensities in sample 2	Mean signal intensities in sample 3	Mean signal intensities in sample 6	lncRNA ID	Chrosome	Strand	Start	End	Length	exoncount	gene	class	database
p5577	2.23538e-10	7.90976e-11	0.14551	341.244	44.22	632.934	75.6833	38.731	33.7724	ENST00000560613.1	15	+	52430624	52432443	1819	2	ENSG00000259709.1	Intronic	ENSEMBL
p15332	1.92409e-07	4.22208e-10	0.14859	407.632	776.786	221.151	29.0642	121.714	58.0752	ENST00000450016.1	7	+	44888657	44889164	507	2	ENSG00000234183.1	Divergent	ENSEMBL
p22861	0.0764331	0.0036112	0.185144	85.4599	175.219	56.1196	4.54962	5.46244	48.6414	TCONS_00011104	5	-	180253867	180255255	1388	2	XLOC_005110	Intergenic	HumanLincRNACatalog
p26400	8.03394e-07	1.21529e-05	0.238593	1100.63	1018.8	2309.05	712.181	28.1217	316.302	uc010lfo.1	7	-	96607658	96641361	33703	2	DLX6-AS1	Antisense	UCSC
p14054	5.29809e-05	1.33544e-06	0.239227	62.1425	598.822	183.218	29.331	139.898	32.7225	ENST00000514793.1	5	+	179085236	179091433	6197	3	ENSG00000250999.1	Intergenic	ENSEMBL
p1310	0.0134604	5.41699e-06	0.247269	124.077	466.089	60.2922	17.8009	113.427	29.6099	ENST00000424735.1	1	+	190448135	190449865	1730	2	ENSG00000237457.2	Intergenic	ENSEMBL
p30329	0.00266123	1.7642e-07	0.251706	1020.57	699.655	383.074	288.508	59.9358	180.969	NR_034002.1	13	-	113621797	113622952	1155	1	MCF2L-AS1	Divergent	RefSeq
p15416	9.6222e-11	0.0176314	0.260018	1109.28	835.467	2488.66	171.479	66.2769	915.009	ENST00000376482.3	7	+	99728586	99738062	9476	2	ENSG00000235077.1	Intergenic	ENSEMBL
p20984	6.94798e-06	0.0286541	0.262613	92.7272	164.845	119.569	1.31382	31.026	66.7023	TCONS_00004578	2	-	217929530	217931700	2170	2	XLOC_002488	Intergenic	HumanLincRNACatalog
p15299	2.36338e-05	0.901974	0.311954	148.13	1344.39	60.1382	346.436	16.547	121.373	ENST00000518886.1	7	+	27286986	27290112	3126	2	ENSG00000253324.1	Divergent	ENSEMBL
p5848	9.62217e-11	4.37199e-07	0.312955	684.682	831.666	962.348	82.942	544.343	148.435	ENST00000570843.1	16	-	3206736	3207484	748	1	ENSG00000261889.1	Intergenic	ENSEMBL
p24469	0.0385274	0.400648	0.321197	105.117	163.385	199.047	48.5298	3.84648	97.7992	TCONS_00016036	9	+	87234247	87271496	37249	4	XLOC_007431	Intergenic	HumanLincRNACatalog
p6739	1.45704e-05	1.54643e-14	0.321768	96.4534	121.113	155.436	6.45052	15.6998	97.8702	ENST00000577309.1	17	-	21359824	21363527	3703	1	ENSG00000265043.1	Intergenic	ENSEMBL
p7810	2.81965e-10	9.35875e-10	0.322246	41.6819	246.795	36.0788	54.0225	29.1029	21.4614	ENST00000583702.1	18	-	72228615	72229335	720	2	ENSG00000264340.1	Antisense	ENSEMBL
p8369	1.08501e-05	0.0369752	0.322367	125.596	89.9675	175.436	21.4715	54.5881	49.9859	ENST00000590369.1	19	-	44616103	44617109	1006	2	ENSG00000186019.10	Divergent	ENSEMBL
p28254	9.64965e-11	4.72818e-15	0.324274	1248.77	1280.46	1315.81	582.213	109.95	554.685	ASO1657	None	None	None	None	#VALUE!	None	ASO1657	Antisense	RNAdb
p6515	8.9897e-12	1.3581e-11	0.326175	3570.83	4719.59	2972.8	243.848	1209.35	2220.58	ENST00000530512.3	16	+	75509793	75529305	19512	2	ENSG00000203472.3	Antisense	ENSEMBL
p10296	0.0144474	0.000241642	0.327879	115.105	732.506	110.245	208.671	3.16696	102.222	ENST00000565664.1	2	+	235131481	235132585	1104	1	ENSG00000261298.1	Intergenic	ENSEMBL
p5895	0.0612239	1.20998e-09	0.328395	81.9052	16.3193	89.3289	4.49354	21.6885	35.4096	ENST00000571939.1	16	-	13291462	13298764	7302	3	ENSG00000262116.1	Antisense	ENSEMBL
p33514	9.73678e-11	1.89668e-06	0.334764	1005.57	967.579	731.881	322.486	55.8147	527.246	ENST00000457464.1	20	+	21126226	21227260	101034	8	ENSG00000088970.11	Antisense	ENSEMBL
p21503	0.000232259	3.06375e-12	0.338389	84.5736	46.8857	3.30114	6.00745	0.338215	39.2558	TCONS_00027903	20	+	10845302	10847830	2528	3	XLOC_013461	Intergenic	HumanLincRNACatalog
p15418	0.000858758	4.39681e-06	0.339598	84.3826	57.6426	23.4314	20.8705	18.1634	17.1549	ENST00000475250.1	7	+	100033826	100036127	2301	2	ENSG00000240211.1	Antisense	ENSEMBL
p14237	2.19026e-10	2.98789e-10	0.339779	2897.64	977.177	4329.05	600.684	843.428	1343.39	ENST00000586974.1	6	-	72017728	72021351	3623	5	ENSG00000232295.3	Intergenic	ENSEMBL
p6734	0.452746	5.4034e-12	0.352934	101.637	50.9893	153.805	6.3117	30.1879	71.6502	ENST00000602532.1	17	-	19800036	19800600	564	2	ENSG00000270091.1	Intergenic	ENSEMBL
p21502	0.0562388	1.3732e-06	0.355194	76.8874	82.1511	94.3138	9.07882	21.329	59.5814	TCONS_00028106	20	+	10844844	10846396	1552	2	XLOC_013461	Intergenic	HumanLincRNACatalog
p26102	1.24673e-08	0.0609282	0.355688	1076.77	973.435	1241.92	94.3742	349.761	726.837	uc002vbd.1	2	-	206983254	206984146	892	1	AX747742	Intergenic	UCSC
p18907	0.00191196	0.000580899	0.355931	61.8938	36.6772	83.2521	18.1438	10.7612	35.8114	TCONS_00020535	12	+	97488888	97521452	32564	2	XLOC_009849	Intergenic	HumanLincRNACatalog
p19318	7.92906e-08	0.569749	0.356021	6463.6	4476.35	3486.64	328.623	423.617	4383.93	TCONS_00023109	14	-	55695907	55696519	612	2	XLOC_011034	Intergenic	HumanLincRNACatalog
p33770	9.71287e-11	0.623515	0.35694	5323.32	3298.23	1140.6	461.457	699.655	2323.39	uc001xoe.3	14	-	73741925	73744629	2704	1	AX747833	Antisense	UCSC
p33607	1.41629e-14	7.07681e-11	0.357351	3532.56	2763.5	4008.27	451.839	1185.56	2044.86	ENST00000431331.1	X	+	75107993	75109321	1328	2	ENSG00000230028.1	Intergenic	ENSEMBL
p16525	6.08089e-05	4.53781e-05	0.358746	399.3	526.656	715.916	8.65918	255.523	324.833	ENST00000447148.1	9	-	88370956	88380027	9071	3	ENSG00000229454.1	Intergenic	ENSEMBL
p29805	0.964908	0.0433413	0.360367	79.9626	79.6414	62.715	42.3521	8.08337	29.6809	TCONS_00003569	2	+	10589730	10597755	8025	4	XLOC_001342	Intergenic	HumanLincRNACatalog
p26971	0.00132557	0.00517972	0.363469	84.8686	82.5913	70.865	41.4839	2.66555	42.4743	uc.21-	1	-	49112985	49113220	235	1	uc.21-	Intronic	UCR
p6325	0.430692	0.956262	0.364621	82.1534	40.0233	81.5991	44.3609	4.27934	25.6607	ENST00000565747.1	16	+	23464327	23467110	2783	2	ENSG00000260136.1	Antisense	ENSEMBL
p33479	1.92571e-05	3.02878e-15	0.368607	4519.95	4557.2	4820.2	817.321	712.643	3592.69	ENST00000586445.1	18	+	12686651	12724519	37868	6	ENSG00000267411.1	Antisense	ENSEMBL
p13313	0.0884889	0.112194	0.370603	89.6046	71.6208	98.5102	18.6095	51.3683	26.2811	ENST00000504833.1	5	-	99786638	99870966	84328	5	ENSG00000247877.2	Divergent	ENSEMBL
p20977	0.784831	7.67928e-05	0.37119	110.556	173.578	54.6018	60.8427	1.41999	63.4729	TCONS_00005329	2	-	208050932	208102779	51847	3	XLOC_002473	Intergenic	HumanLincRNACatalog
p28285	0.360189	1.00668e-15	0.377877	79.2423	69.4758	28.3374	28.4097	13.8284	24.6671	ASO3503	None	None	None	None	#VALUE!	None	ASO3503	Divergent	RNAdb
p29323	0.971447	1.39999e-09	0.378478	78.9718	74.9689	78.4542	31.2174	8.51714	48.2217	ENST00000441316.1	22	-	41605125	41613631	8506	3	ENSG00000235513.1	Antisense	ENSEMBL
p2093	4.85886e-06	3.22544e-11	0.380496	109.606	180.83	56.6554	26.3451	1.92855	103.793	ENST00000594818.1	10	+	104209949	104220863	10914	3	ENSG00000269609.1	Antisense	ENSEMBL
p4360	3.39577e-07	4.86144e-08	0.381045	47.2342	88.804	46.6355	25.9488	20.0314	23.6267	ENST00000548875.1	14	-	19892137	19921455	29318	3	ENSG00000244306.5	Intergenic	ENSEMBL
p5743	0.0291821	1.75386e-09	0.385149	60.6732	81.9222	52.1829	6.51024	47.4326	21.0758	ENST00000553478.1	15	+	93856434	94112712	256278	4	ENSG00000257060.2	Intergenic	ENSEMBL
p6812	1.97651e-05	1.32223e-07	0.385804	82.6433	86.9158	96.0458	9.62834	1.24405	91.5991	ENST00000420946.1	17	-	36158868	36162759	3891	3	ENSG00000237184.1	Intergenic	ENSEMBL
p8332	0.245008	1.32481e-10	0.391369	104.303	99.0498	120.581	22.6562	36.0174	68.104	ENST00000585397.1	19	-	37988264	37997169	8905	3	ENSG00000266916.1	Divergent	ENSEMBL
p27549	6.5159e-10	0.00836246	0.394535	2859.56	2124.3	4055	1290.68	382.768	1892.7	uc.138+	3	+	185649295	185649714	419	1	uc.138+	Intronic	UCR
p20009	0.000340705	4.71271e-09	0.394812	164.789	175.686	168.632	48.917	13.4611	138.623	TCONS_00024359	16	+	27297664	27301805	4141	2	XLOC_011681	Intergenic	HumanLincRNACatalog
p12981	0.000950104	3.44974e-06	0.395125	108.98	183.833	138.712	56.9242	21.3177	92.2645	ENST00000507838.1	4	+	166605790	166683930	78140	6	ENSG00000249500.1	Intergenic	ENSEMBL
p72	9.70236e-11	0.0153506	0.396046	632.259	986.07	827.69	158.756	572.8	237.179	ENST00000441809.2	1	-	13983805	13986405	2600	2	ENSG00000237445.2	Intergenic	ENSEMBL
p19155	1.86395e-07	0.000651673	0.396407	97.1608	149.582	163.741	56.3964	31.5434	74.7787	TCONS_00021529	13	+	23743973	23744736	763	2	XLOC_010308	Intergenic	HumanLincRNACatalog
p27286	0.127491	2.36924e-08	0.402378	2619.17	3031.76	3641.93	37.0941	1473.14	2229	uc.413+	17	+	37566518	37566790	272	1	uc.413+	Antisense	UCR
p9212	0.000553565	4.75555e-09	0.404013	87.7454	72.1916	96.6281	34.3704	6.17945	63.1058	ENST00000443301.1	2	-	79720841	79727970	7129	5	ENSG00000229385.1	Intergenic	ENSEMBL
p10578	0.00029423	9.96852e-06	0.405996	66.3598	80.738	79.1488	49.0001	7.65207	35.2031	ENST00000445606.1	20	+	38633125	38637171	4046	3	ENSG00000237767.1	Intergenic	ENSEMBL
p27477	1.63867e-09	3.69416e-11	0.406716	65.1711	34.6876	79.0086	4.37578	8.0215	60.3509	uc.105+	2	+	174989786	174990009	223	1	uc.105+	Intronic	UCR
p12023	0.0735199	6.76266e-07	0.406764	125.68	179.758	187.987	84.1282	5.04302	111.536	ENST00000471176.2	3	+	149694541	149697115	2574	3	ENSG00000242791.2	Intergenic	ENSEMBL
p11374	1.66043e-05	1.28043e-12	0.406904	655.417	692.828	782.283	121.53	173.237	572.152	ENST00000452042.1	3	-	49022481	49027421	4940	2	ENSG00000223343.1	Antisense	ENSEMBL
p16979	1.68122e-07	0.0361129	0.408333	110.062	169.004	165.341	27.5167	21.6615	132.288	ENST00000425057.1	X	-	12391285	12393252	1967	2	ENSG00000223487.1	Intronic	ENSEMBL
p8089	1.11922e-05	4.82061e-15	0.414111	104.567	141.443	165.276	18.4818	56.858	94.9784	ENST00000577382.1	18	+	75897222	75900887	3665	2	ENSG00000266213.1	Intergenic	ENSEMBL
p22215	2.35196e-06	5.75898e-11	0.419323	100.382	181.935	128.266	26.3025	21.941	123.923	TCONS_00007050	3	+	184119379	184168918	49539	3	XLOC_002949	Intergenic	HumanLincRNACatalog
p13297	0.000161927	6.44759e-11	0.419621	59.454	53.9526	87.4466	42.1572	0.883654	41.2414	ENST00000513055.1	5	-	92889466	92921354	31888	4	ENSG00000237187.3	Antisense	ENSEMBL
p591	1.88544e-14	1.72403e-09	0.420219	51.3914	1.05964	98.6213	14.4389	5.92919	43.1155	ENST00000422250.1	1	-	197407105	197416599	9494	4	ENSG00000230260.1	Antisense	ENSEMBL
p29979	0.201307	0.12428	0.4208	65.4215	57.3596	99.7464	53.2696	4.24105	36.129	TCONS_00014917	8	-	5858958	5860627	1669	2	XLOC_006983	Intergenic	HumanLincRNACatalog
p23698	2.44736e-10	6.32513e-06	0.422159	1249	878.657	874.243	27.9117	430.037	809.331	TCONS_00014390	7	-	104653693	104654602	909	3	XLOC_006554	Divergent	HumanLincRNACatalog
p18780	2.2012e-06	0.00010526	0.422745	101.291	154.5	98.7071	34.7342	23.5784	91.5497	TCONS_00020286	12	+	6281528	6282555	1027	2	XLOC_009630	Intergenic	HumanLincRNACatalog
p6453	0.016832	5.06844e-15	0.422767	58.255	12.1367	99.684	2.18823	45.2282	24.486	ENST00000415422.1	16	+	62630275	62632353	2078	2	ENSG00000231589.1	Intergenic	ENSEMBL
p24185	8.13833e-05	4.13868e-06	0.42311	293.736	347.329	424.702	68.8264	27.7372	354.373	TCONS_00014773	8	+	78311308	78363014	51706	2	XLOC_006852	Intergenic	HumanLincRNACatalog
p26869	9.6581e-11	0.000749561	0.424699	3888.57	4550.91	4120.76	3462.79	47.6699	1823.86	HIT000070642	5	+	108670481	108670873	392	1	HIX0032566	Antisense	H-InvDB
p26933	1.54116e-10	0.0187448	0.425406	5334.56	3717.61	1565.63	698.67	20.967	3797.24	HIT000393032	X	-	123094061	123164898	70837	4	HIX0176596	Antisense	H-InvDB
p23968	0.000337171	5.14614e-09	0.428686	45.3292	89.779	61.2113	9.24608	20.8141	54.0991	TCONS_00015440	8	-	57447959	57449765	1806	2	XLOC_007088	Intergenic	HumanLincRNACatalog
p8091	7.84149e-06	1.78886e-09	0.42923	93.5038	22.5645	198.777	26.6987	3.85805	104.584	ENST00000581634.1	18	+	76265164	76266410	1246	2	ENSG00000265378.1	Intergenic	ENSEMBL
p19096	0.00661853	7.62e-08	0.431274	82.7316	92.789	61.7898	4.61412	40.3329	57.3987	TCONS_00022304	13	-	95157772	95201597	43825	2	XLOC_010693	Intergenic	HumanLincRNACatalog
p6134	0.0271036	2.64737e-11	0.431889	58.8949	62.4274	8.41076	20.1274	12.5141	23.3888	ENST00000568819.1	16	-	80251931	80574767	322836	5	ENSG00000259867.1	Divergent	ENSEMBL
p7676	2.85029e-07	9.97448e-08	0.433969	60.9055	65.8162	66.5088	6.60256	28.3598	48.8936	ENST00000582300.1	18	-	21538059	21562520	24461	2	ENSG00000265752.1	Intergenic	ENSEMBL
p24045	0.00512265	0.00105957	0.434019	63.9371	11.939	76.7646	25.42	9.90706	30.9219	TCONS_00015168	8	-	128153590	128197980	44390	4	XLOC_007214	Intergenic	HumanLincRNACatalog
p3926	0.000820475	0.00426671	0.434086	83.1444	94.8298	82.7271	8.23087	30.9989	73.937	ENST00000536342.1	12	+	128366161	128367536	1375	3	ENSG00000256597.1	Intergenic	ENSEMBL
p4715	0.308639	2.47679e-09	0.436621	5704.1	4686.76	1479.03	945.708	451.684	3785.25	ENST00000497872.2	14	-	106170300	106170939	639	2	ENSG00000253701.1	Intergenic	ENSEMBL
p30241	0.000935378	0.0237004	0.438707	80.6124	39.2686	99.4151	7.18306	13.9984	75.0253	uc010lnm.2	7	-	141404137	141438030	33893	7	FLJ40852	Antisense	UCSC
p2964	0.64496	0.00450952	0.440515	627.042	984.332	677.719	260.295	149.189	598.896	ENST00000526274.1	11	+	118575315	118620973	45658	3	ENSG00000255422.1	Antisense	ENSEMBL
p4042	0.0193655	0.00538945	0.441443	99.9108	147.601	115.736	53.6466	49.173	57.5339	ENST00000436963.1	13	-	48876582	48877795	1213	2	ENSG00000231473.2	Divergent	ENSEMBL
p2848	0.00501175	1.20728e-06	0.442626	2900.17	4804	2850.65	865.384	919.806	2886.64	ENST00000529304.1	11	+	74975332	74976214	882	2	ENSG00000254963.1	Antisense	ENSEMBL
p1984	0.330667	5.989e-08	0.443687	117.256	155.206	162.329	105.62	2.51896	84.772	ENST00000560700.1	10	+	72698809	72715398	16589	3	ENSG00000259267.1	Intergenic	ENSEMBL
p25247	0.000403029	8.6456e-07	0.443911	1370.58	809.041	1237.21	350.52	94.3113	1071.93	NR_033947.1	3	-	45719656	45730374	10718	3	LIMD1-AS1	Antisense	RefSeq
p6543	0.808799	3.39525e-08	0.445218	623.377	895.405	978.183	97.3766	316.609	697.708	ENST00000569731.1	16	+	81773230	81801311	28081	5	ENSG00000261218.1	Intergenic	ENSEMBL
p6281	0.000267884	2.23622e-10	0.446434	325.496	377.881	233.15	165.172	66.3166	186.608	ENST00000573379.1	16	+	11034575	11036878	2303	2	ENSG00000262222.1	Antisense	ENSEMBL
p9542	7.93907e-06	0.00155944	0.448218	66.7832	45.251	65.8569	26.5655	3.51675	49.6518	ENST00000411433.1	2	-	219191611	219222689	31078	4	ENSG00000237281.1	Antisense	ENSEMBL
p7558	7.83817e-09	0.000241645	0.448241	7275.46	2338.65	4035.76	91.7891	228.853	5797.78	ENST00000576554.1	17	+	79825597	79826428	831	2	ENSG00000262413.1	Antisense	ENSEMBL
p25057	0.106748	1.90523e-07	0.448309	339.337	435.417	281.215	46.985	20.4591	405.957	NR_027942.1	17	-	53029258	53046064	16806	5	COX11	Antisense	RefSeq
p16209	1.99344e-08	0.00327004	0.449368	60.1732	97.1308	83.9963	28.0549	6.9118	73.466	ENST00000517899.1	8	+	64382885	64385202	2317	2	ENSG00000253894.1	Intergenic	ENSEMBL
p24245	9.6281e-07	3.96618e-12	0.450084	60.7658	78.0921	69.0106	44.2246	3.32723	46.0066	TCONS_00015371	8	+	135845072	135846641	1569	2	XLOC_006935	Intergenic	HumanLincRNACatalog
p1529	0.817938	0.00329377	0.450583	408.695	375.755	326.735	26.9412	149.259	324.481	ENST00000414939.1	10	-	18943792	18948167	4375	3	ENSG00000152487.5	Divergent	ENSEMBL
p6697	0.278455	6.47706e-10	0.45117	77.8081	49.7959	92.129	23.2971	45.9371	29.9028	ENST00000580422.1	17	-	15283180	15321195	38015	4	ENSG00000266667.1	Intergenic	ENSEMBL
p28556	0.319886	3.13708e-10	0.451252	298.574	476.286	80.8979	88.462	9.42095	288.28	ASO1710	None	None	None	None	#VALUE!	None	ASO1710	Antisense	RNAdb
p27615	0.000252207	2.11178e-07	0.452038	87.4588	41.7186	99.2059	22.1637	2.00356	79.0708	uc.158+	5	+	77140252	77140476	224	1	uc.158+	Intergenic	UCR
p6222	0.00178729	2.03842e-05	0.452836	324.192	455.914	275.122	21.6315	130.932	325.282	ENST00000412293.1	16	+	432096	442960	10864	3	ENSG00000236829.4	Divergent	ENSEMBL
p6765	0.305927	6.8071e-12	0.453542	307.97	485.929	430.644	80.3797	142.884	332.119	ENST00000582367.1	17	-	27948634	27949272	638	1	ENSG00000264007.1	Divergent	ENSEMBL
p10502	0.0901586	2.38256e-10	0.45385	84.1026	39.4708	56.0475	33.2853	18.1372	30.0984	ENST00000431361.1	20	-	61431978	61436939	4961	3	ENSG00000229873.1	Antisense	ENSEMBL
p33783	2.79156e-11	5.87453e-06	0.454259	21298.2	71838.9	72354.5	6240.39	25832.1	43103.5	uc010uzs.1	16	-	15198369	15225567	27198	18	FLJ00285	Intronic	UCSC
p7003	0.00388651	2.18994e-12	0.454331	106.337	112.945	165.096	9.60705	49.281	115.747	ENST00000602213.1	17	-	70036854	70107844	70990	6	ENSG00000234899.4	Intergenic	ENSEMBL
p4225	8.37238e-05	0.000119776	0.454466	46.7337	80.0855	67.2318	3.6533	37.3926	47.1436	ENST00000600477.1	13	+	52028299	52069805	41506	5	ENSG00000236778.2	Intergenic	ENSEMBL
p2342	4.62596e-09	0.0546451	0.45588	1070.06	686.81	966.21	448.578	130.54	662.281	ENST00000540904.1	11	-	62622151	62622960	809	2	ENSG00000255717.1	Divergent	ENSEMBL
p2894	2.87187e-06	1.66415e-08	0.456302	65.1961	22.819	70.4951	18.0374	9.57459	44.7165	ENST00000531827.1	11	+	86667132	86711532	44400	3	ENSG00000246523.3	Divergent	ENSEMBL
p5271	1.60859e-08	1.45318e-08	0.456637	43.1045	14.3853	46.3907	13.9031	13.384	20.1486	ENST00000501931.1	15	-	76020010	76030964	10954	3	ENSG00000246877.1	Antisense	ENSEMBL
p7531	0.398269	1.95192e-13	0.457725	124.148	50.9445	192.061	39.3479	53.1452	75.5625	ENST00000586321.1	17	+	76311809	76343879	32070	3	ENSG00000267737.1	Intergenic	ENSEMBL
p11252	0.00707962	9.34248e-09	0.457749	99.28	2.64698	131.635	72.522	3.82676	30.5639	ENST00000441386.2	3	-	4940363	5021622	81259	3	ENSG00000235831.2	Antisense	ENSEMBL
p14248	0.0273396	0.000342282	0.457796	96.5471	176.059	193.856	63.8363	83.6242	66.0842	ENST00000423099.1	6	-	74201747	74202465	718	2	ENSG00000223821.1	Antisense	ENSEMBL
p5200	0.00640133	2.46986e-06	0.457799	50.9715	31.0865	74.0961	20.0593	12.4571	38.9708	ENST00000558905.1	15	-	63362223	63364110	1887	2	ENSG00000259627.1	Antisense	ENSEMBL
p4586	6.95565e-09	0.241195	0.459617	317.126	43.1051	444.17	126.429	24.6477	218.64	ENST00000554430.1	14	-	75471421	75475184	3763	2	ENSG00000258646.1	Antisense	ENSEMBL
p9981	8.01469e-07	1.13034e-06	0.459719	87.999	67.4214	74.302	6.90891	32.6289	66.0699	ENST00000413602.1	2	+	120234023	120244922	10899	2	ENSG00000231013.1	Antisense	ENSEMBL
p28300	1.39885e-06	6.99318e-07	0.460319	62.9536	70.5296	20.3198	30.3063	1.97219	38.5199	ASO1796	None	None	None	None	#VALUE!	None	ASO1796	Antisense	RNAdb
p22498	4.00217e-07	0.000604138	0.463032	59.659	97.0583	74.3499	4.06468	69.4153	33.5116	TCONS_00007535	4	+	57488954	57492377	3423	2	XLOC_003546	Intergenic	HumanLincRNACatalog
p25456	1.9636e-05	1.07806e-06	0.46307	63.3264	56.5946	53.8499	36.1541	0.622479	43.6916	NR_033999.1	7	-	139102207	139112272	10065	3	LOC100129148	Antisense	RefSeq
p20728	9.63561e-11	4.22091e-05	0.463545	771.723	738.7	168.142	342.192	38.4485	397.45	TCONS_00027619	19	+	53727165	53727904	739	2	XLOC_013142	Intergenic	HumanLincRNACatalog
p13420	1.57775e-05	8.72035e-11	0.463837	1188.48	1498.38	1225.15	510.858	155.058	1148.62	ENST00000504539.1	5	-	137682715	137685330	2615	2	ENSG00000249971.1	Antisense	ENSEMBL
p13871	9.46817e-05	3.71401e-05	0.463961	62.8629	90.3175	11.9595	29.9045	2.71013	44.0038	ENST00000512965.1	5	+	124443896	124485622	41726	2	ENSG00000249365.1	Intergenic	ENSEMBL
p11044	4.1166e-06	4.71142e-16	0.464022	59.1555	21.0074	83.5694	22.7331	28.0534	25.1889	ENST00000424613.1	22	-	42377307	42378221	914	3	ENSG00000224883.1	Antisense	ENSEMBL
p1760	0.0910663	0.443362	0.464489	202.594	275.056	243.336	73.5636	31.1682	230.159	ENST00000452252.1	10	-	120068117	120069092	975	3	ENSG00000243540.1	Antisense	ENSEMBL
p12136	0.0816626	0.00140887	0.464517	85.3664	33.4314	6.71884	20.8721	7.87034	29.5622	ENST00000600750.1	3	+	181670136	181690285	20149	5	ENSG00000242512.3	Intergenic	ENSEMBL
p27017	1.79749e-06	0.00141463	0.464719	63.1044	32.9611	85.7015	18.186	1.63878	64.6457	uc.25+	1	+	51166033	51166268	235	1	uc.25+	Intronic	UCR
p33510	9.62645e-11	4.52429e-11	0.464939	8219.68	4854.76	2883.37	2270.09	813.448	4335.86	ENST00000442524.1	2	+	234263219	234301045	37826	4	ENSG00000243637.1	Antisense	ENSEMBL
p15832	8.20933e-05	0.802021	0.466369	66.6442	90.1715	79.5743	32.6284	25.3902	52.2262	ENST00000518861.1	8	-	93735251	93737339	2088	2	ENSG00000254020.1	Intergenic	ENSEMBL
p13767	1.12643e-06	0.0839051	0.466769	319.886	490.571	381.923	104.868	33.5387	418.159	ENST00000513704.1	5	+	88185124	88239160	54036	3	ENSG00000248309.1	Antisense	ENSEMBL
p13723	0.00252994	4.57088e-06	0.467103	62.8581	62.0162	13.1458	27.8492	7.75787	28.8625	ENST00000512213.1	5	+	76382625	76401633	19008	6	ENSG00000250802.2	Antisense	ENSEMBL
p16016	6.16126e-06	0.000276194	0.469185	77.9094	88.5897	21.2659	17.5728	10.0801	60.4437	ENST00000522836.1	8	+	9106926	9112509	5583	2	ENSG00000254235.1	Intergenic	ENSEMBL
p20222	0.276098	0.000257558	0.471675	104.709	195.335	132.639	58.5729	69.9614	75.5509	TCONS_00026158	17	-	72057138	72108911	51773	4	XLOC_012572	Intergenic	HumanLincRNACatalog
p28895	0.473428	5.95053e-14	0.473319	137.698	74.7981	113.113	14.4598	58.3183	81.3386	LIT3609	None	None	None	None	#VALUE!	None	LIT3609	Antisense	RNAdb
p8557	1.38468e-07	0.378852	0.474364	101.838	181.256	169.896	29.5545	70.3803	114.948	ENST00000588047.1	19	+	12098470	12146729	48259	2	ENSG00000219665.4	Antisense	ENSEMBL
p20643	0.000243663	0.00312554	0.475329	61.3556	93.6871	29.9829	19.015	20.5554	48.3777	TCONS_00027424	19	-	56035724	56037773	2049	2	XLOC_013413	Intergenic	HumanLincRNACatalog
p26547	0.00244271	0.0609732	0.477866	19884.9	21222.8	37607.6	10884	6258.75	20472.6	uc021zoa.1	HSCHR6_MHC_DBB_CTG1	-	3774822	3821792	46970	3	HLA-DRB1	Intergenic	UCSC
p18817	3.43541e-08	8.79356e-08	0.478016	51.6771	31.0865	74.0961	20.0593	12.4571	42.4651	TCONS_00020373	12	+	32803413	32810771	7358	2	XLOC_009705	Intergenic	HumanLincRNACatalog
p29138	0.0385444	3.92864e-09	0.478186	82.1307	45.2132	94.7578	17.2241	52.7039	36.2779	ENST00000561547.1	16	-	28890277	28891216	939	2	ENSG00000260442.1	Antisense	ENSEMBL
p28429	9.72691e-11	0.947786	0.478895	7051.31	4182.32	1285.19	490.34	2081.03	3423.83	ASO3666	None	None	None	None	#VALUE!	None	ASO3666	Antisense	RNAdb
p27578	0.831292	0.566274	0.479042	98.4648	140.416	96.6586	42.203	57.6824	60.8521	uc.157-	5	-	76941160	76941367	207	1	uc.157-	Intergenic	UCR
p3933	0.0212138	8.76738e-07	0.479123	86.7003	81.1552	77.2275	10.6776	45.5902	61.157	ENST00000563922.1	12	+	130734223	130751270	17047	2	ENSG00000259862.1	Intergenic	ENSEMBL
p8024	0.00316612	6.43149e-09	0.479994	74.6551	34.18	76.9149	12.5737	13.7276	62.8576	ENST00000592032.1	18	+	54695062	54706076	11014	3	ENSG00000267225.1	Antisense	ENSEMBL
p7008	0.000972056	6.85376e-09	0.480051	76.2723	96.6063	75.4407	12.3845	52.3826	54.4389	ENST00000414600.1	17	-	70086599	70137921	51322	2	ENSG00000234899.4	Antisense	ENSEMBL
p18757	1.23812e-08	3.96345e-13	0.480829	85.7555	55.8879	92.6263	16.3197	1.88298	94.441	TCONS_00021001	12	-	130637579	130646801	9222	3	XLOC_010263	Divergent	HumanLincRNACatalog
p10427	0.00020302	3.32132e-07	0.481298	124.996	156.483	190.552	16.7567	82.6364	127.795	ENST00000453914.1	20	-	34064027	34078808	14781	2	ENSG00000230155.2	Antisense	ENSEMBL
p5002	1.27505e-10	5.24337e-14	0.481822	46.2119	96.1729	54.8756	39.9209	36.7573	18.3662	ENST00000554852.1	14	+	101361225	101373343	12118	5	ENSG00000258399.1	Intergenic	ENSEMBL
p29982	0.00129647	5.35076e-06	0.481907	89.0089	40.7884	96.2349	0.298455	54.7935	53.8344	TCONS_00015010	8	-	57406840	57472135	65295	3	XLOC_007087	Intergenic	HumanLincRNACatalog
p5142	1.00688e-06	3.23053e-10	0.48317	80.4384	91.6327	68.6361	1.31205	44.8227	70.1679	ENST00000527933.2	15	-	45672697	45689544	16847	3	ENSG00000230288.4	Intergenic	ENSEMBL
p13449	1.93211e-12	0.534315	0.483249	4095.03	4124.4	3005	2227.48	796.421	2400.3	ENST00000499521.2	5	-	148873876	148884233	10357	2	ENSG00000230551.3	Antisense	ENSEMBL
p5131	4.00318e-05	7.20612e-08	0.484389	768.896	927.148	986.055	260.159	329.704	709.316	ENST00000560750.1	15	-	44819454	44828838	9384	3	ENSG00000179523.4	Divergent	ENSEMBL
p2136	2.26818e-06	7.91906e-05	0.484965	78.9778	79.672	96.6349	7.62832	45.3178	70.858	ENST00000428814.1	10	+	134232586	134234457	1871	2	ENSG00000231705.1	Intergenic	ENSEMBL
p15714	3.18971e-07	1.27468e-07	0.48563	49.7066	67.7319	55.04	8.23616	55.9654	19.5591	ENST00000518779.2	8	-	59172296	59184601	12305	3	ENSG00000253281.2	Intergenic	ENSEMBL
p15300	0.0042952	1.0221e-07	0.486937	66.6216	31.3993	84.4638	31.3282	14.6361	42.8943	ENST00000444500.2	7	+	28279502	28283536	4034	2	ENSG00000234336.2	Intergenic	ENSEMBL
p11639	0.0010555	0.0684817	0.487231	78.6348	98.4422	49.3973	59.6149	7.38724	43.3431	ENST00000431427.1	3	-	183812905	183822966	10061	3	ENSG00000238020.1	Antisense	ENSEMBL
p15491	0.0629389	0.000328842	0.487278	73.8318	61.7183	72.1701	4.20645	26.0003	71.0108	ENST00000419211.1	7	+	135611202	135617629	6427	2	ENSG00000224746.1	Antisense	ENSEMBL
p26682	1.07812e-05	1.03067e-06	0.487399	100.862	188.648	189.931	72.9028	9.08987	151.686	HIT000389993	14	+	60323030	60323404	374	1	HIX0096257	Intronic	H-InvDB
p12529	6.81026e-06	0.00177737	0.487453	61.3716	84.5497	72.1017	8.80677	52.9866	44.4825	ENST00000502956.1	4	-	174817544	174833046	15502	4	ENSG00000250043.1	Intergenic	ENSEMBL
p18051	0.361579	2.79424e-06	0.488423	58.3208	84.9175	75.8184	6.09739	73.9974	26.8975	TCONS_00018669	10	+	4067129	4069180	2051	2	XLOC_008358	Intergenic	HumanLincRNACatalog
p22448	0.00221396	1.16045e-08	0.490253	97.9204	28.4428	192.133	43.6602	40.4947	71.9888	TCONS_00007988	4	+	11315541	11352918	37377	5	XLOC_003455	Intergenic	HumanLincRNACatalog
p8728	0.0681028	5.33151e-07	0.490855	81.7156	39.239	65.4725	21.1878	33.8182	36.5027	ENST00000586013.1	19	+	38042273	38076275	34002	3	ENSG00000267470.1	Antisense	ENSEMBL
p5108	0.00570134	1.39115e-08	0.491279	62.7672	68.6086	75.1462	57.5391	6.90823	37.0125	ENST00000558209.1	15	-	39363771	39719396	355625	3	ENSG00000259345.1	Antisense	ENSEMBL
p29635	2.65451e-05	4.47577e-06	0.491375	125.67	143.543	180.666	47.9512	59.7834	113.325	TCONS_00020175	12	-	119721629	119741185	19556	4	XLOC_010217	Intergenic	HumanLincRNACatalog
p23765	1.64893e-08	1.38267e-06	0.491536	112.935	172.636	176.304	40.5494	42.7098	143.768	TCONS_00014104	7	+	35756038	35759414	3376	3	XLOC_006043	Intergenic	HumanLincRNACatalog
p16473	1.98197e-05	0.0818712	0.494007	75.6409	72.35	45.5381	22.0123	21.7688	51.8235	ENST00000420315.1	9	-	33512956	33514771	1815	3	ENSG00000228072.1	Intergenic	ENSEMBL
p18635	2.24434e-06	1.06428e-06	0.494534	77.6447	69.4777	82.2421	0.156524	33.2776	79.9943	TCONS_00020822	12	-	67485324	67490160	4836	3	XLOC_010110	Intergenic	HumanLincRNACatalog
p16104	0.0705484	0.000236261	0.494593	63.7525	88.4263	8.10201	22.9738	23.8967	32.4032	ENST00000522967.1	8	+	29722159	29729177	7018	2	ENSG00000254086.1	Intergenic	ENSEMBL
p26389	0.00309458	1.93362e-05	0.49597	207.762	280.187	179.433	75.1069	21.2932	234.601	uc003tka.1	7	-	44115336	44117891	2555	1	AX747737	Intronic	UCSC
p26820	0.106515	0.132202	0.496239	337.411	391.762	423.47	4.63604	136.67	430.681	HIT000282466	4	+	174515175	174515707	532	1	HIX0031495	Intergenic	H-InvDB
p2190	0.0225922	0.000287411	0.496611	61.8237	1.14931	85.387	48.9675	1.23911	23.4707	ENST00000524855.1	11	-	11264734	11265262	528	2	ENSG00000255260.1	Intergenic	ENSEMBL
p10600	8.57329e-12	6.2656e-08	0.496713	11239.9	2603.98	3293.78	198.531	1905.5	6408.47	ENST00000428008.1	20	+	47895178	47905797	10619	5	ENSG00000177410.8	Divergent	ENSEMBL
p27423	1.14656e-10	1.77927e-10	0.497206	4543.65	3721.65	1246.96	1875.92	407.246	2446.38	uc.50+	2	+	38976300	38976522	222	1	uc.50+	Intronic	UCR
p29139	0.940698	6.30395e-06	0.497368	85.4705	35.1722	56.1759	1.34548	42.0992	44.4993	ENST00000569981.1	16	-	29819965	29823306	3341	2	ENSG00000238045.5	Antisense	ENSEMBL
p28633	0.000167372	2.41724e-09	0.498572	164.949	192.639	184.253	25.7184	59.1892	185.239	ASO2233	None	None	None	None	#VALUE!	None	ASO2233	Antisense	RNAdb
p15985	2.86819e-14	0.000146858	0.498594	99.1006	159.858	116.312	46.7599	1.73632	138.611	ENST00000527579.1	8	-	144791176	144795754	4578	4	ENSG00000254574.1	Divergent	ENSEMBL
p5681	0.00393921	0.00278282	0.499763	167.928	138.49	184.58	135.239	25.3259	84.8174	ENST00000560265.1	15	+	77938699	77940543	1844	3	ENSG00000259666.1	Intergenic	ENSEMBL
p5014	8.28237e-06	7.43041e-07	0.499804	79.7835	76.077	38.9035	17.1244	15.1304	65.089	ENST00000554369.1	14	+	101417780	101426516	8736	6	ENSG00000225746.3	Intergenic	ENSEMBL
p21928	0.00600098	2.65889e-09	0.499905	81.8384	76.7844	9.8309	12.8848	21.9553	49.3707	TCONS_00006646	3	-	127199570	127241404	41834	4	XLOC_003240	Intergenic	HumanLincRNACatalog
p26819	0.012361	0.00301122	0.500506	2807.45	4263.85	4175.66	695.43	2064.25	2869.49	HIT000079422	4	+	154605403	154609201	3798	2	HIX0004581	Antisense	H-InvDB
p20314	0.308438	2.42438e-08	0.500778	83.2918	15.3847	72.1972	32.4875	5.81913	47.2631	TCONS_00025394	17	+	41393290	41393906	616	2	XLOC_012209	Intergenic	HumanLincRNACatalog
p27962	1.03516e-07	0.249747	0.500952	46.7962	30.0656	87.804	36.3466	24.7011	21.4419	nc-HOXA5-67	7	+	26956528	26956755	227	1	nc-HOXA5-67	Intergenic	HOX Loci
p20177	0.00329964	3.23272e-05	0.501639	84.0461	50.1172	39.7442	32.6235	7.74046	46.8749	TCONS_00025686	17	-	46124253	46124834	581	2	XLOC_012503	Divergent	HumanLincRNACatalog
p20190	0.0481725	0.00108522	0.503547	95.888	66.0171	156.949	90.1939	1.20192	69.162	TCONS_00026124	17	-	55149781	55162000	12219	3	XLOC_012530	Divergent	HumanLincRNACatalog
p3768	1.44922e-05	5.32393e-06	0.503631	111.215	140.155	151.911	56.1472	31.4356	115.522	ENST00000551032.1	12	+	79935985	79944126	8141	3	ENSG00000257474.1	Intergenic	ENSEMBL
p1752	0.000232471	5.97086e-12	0.504545	102.618	174.974	129.304	93.5149	32.1543	79.6282	ENST00000412075.1	10	-	119232725	119236135	3410	2	ENSG00000229847.2	Intergenic	ENSEMBL
p4336	0.000326215	0.317841	0.505095	100.872	83.0015	130.491	17.4808	31.0314	110.271	ENST00000401043.3	13	+	112248355	112294426	46071	2	ENSG00000215881.3	Intergenic	ENSEMBL
p33555	1.06541e-06	0.000424341	0.506154	7983.14	2788.64	4639.52	360.649	1036.75	6403.1	ENST00000460744.1	3	+	111011565	111261149	249584	5	ENSG00000241177.1	Antisense	ENSEMBL
p2087	0.0217537	0.00392918	0.507839	80.2575	67.4527	60.6736	21.1459	3.55357	81.1259	ENST00000454527.1	10	+	102992008	102998249	6241	3	ENSG00000227128.2	Intergenic	ENSEMBL
p26165	0.00990585	3.66388e-06	0.509028	61.6438	82.8521	5.59899	10.2202	40.7456	25.4368	uc002zah.1	21	-	43495003	43496973	1970	1	AX748362	Antisense	UCSC
p33576	0.000412105	0.547845	0.509632	125.069	124.399	101.386	9.89271	44.4887	124.425	ENST00000428100.1	7	-	20173546	20180076	6530	2	ENSG00000243004.1	Antisense	ENSEMBL
p4539	0.108851	0.000459193	0.509737	212.956	194.897	205.374	25.5096	6.40269	280.672	ENST00000508827.1	14	-	62023037	62037371	14334	5	ENSG00000250548.2	Intergenic	ENSEMBL
p28706	0.0120501	2.69128e-07	0.510524	73.6279	3.01387	91.0333	14.9962	14.3867	56.2192	ASO1895	None	None	None	None	#VALUE!	None	ASO1895	Antisense	RNAdb
p639	0.000918981	4.28123e-09	0.510873	61.7056	56.9962	63.7082	5.85533	56.5382	30.7949	ENST00000598091.1	1	-	214139474	214160973	21499	5	ENSG00000230461.3	Divergent	ENSEMBL
p11773	1.26962e-09	4.102e-10	0.511172	42.3628	59.8582	34.7172	37.9047	5.50363	26.5906	ENST00000436598.1	3	+	31750813	31763144	12331	4	ENSG00000232490.2	Intronic	ENSEMBL
p2330	1.25502e-10	0.89505	0.511286	4692.88	3088.46	3201.23	2451.63	641.368	2522.24	ENST00000541578.1	11	-	62619768	62622960	3192	11	ENSG00000255717.1	Divergent	ENSEMBL
p28809	0.0155585	2.15466e-11	0.51228	87.1947	97.5783	82.3583	93.1416	14.8932	28.8113	LIT3487	None	None	None	None	#VALUE!	None	LIT3487	Antisense	RNAdb
p23301	6.61623e-08	2.41172e-06	0.512508	39.5252	66.315	44.92	30.4168	28.3202	18.5288	TCONS_00012818	6	-	159990987	160009222	18235	2	XLOC_005900	Intergenic	HumanLincRNACatalog
p23607	0.696826	0.000121177	0.512848	136.984	143.395	186.301	25.4029	130.645	83.2877	TCONS_00014248	7	-	2761465	2764726	3261	2	XLOC_006336	Intergenic	HumanLincRNACatalog
p3005	6.75025e-08	0.0546787	0.514883	65.0629	68.5312	7.69711	12.839	24.1125	35.7969	ENST00000441665.1	11	+	131056916	131059648	2732	2	ENSG00000236129.1	Intergenic	ENSEMBL
p11701	5.56066e-07	6.96575e-12	0.516057	77.7179	16.4894	96.4997	14.5786	28.6972	55.1397	ENST00000423460.1	3	-	197765191	197766105	914	3	ENSG00000232832.1	Antisense	ENSEMBL
p26693	0.0133426	2.5602e-06	0.516325	135.313	120.841	42.0901	38.7677	25.4659	89.7577	HIT000071448	15	-	99675517	99675777	260	1	HIX0079658	Antisense	H-InvDB
p30068	9.44216e-05	0.000251708	0.518144	105.739	155.673	196.388	123.983	23.8054	89.4183	NR_046869.1	13	-	79361453	79398991	37538	4	LINC00331	Intergenic	RefSeq
p8130	0.00614174	6.93669e-16	0.518177	100.352	93.863	37.6623	21.7297	10.1228	88.3006	ENST00000589365.1	19	-	2847224	2858714	11490	2	ENSG00000267063.1	Antisense	ENSEMBL
p28568	0.00609288	4.16632e-14	0.51819	3927	3239.24	3714.46	369.97	1396.53	3871.78	ASO1757	None	None	None	None	#VALUE!	None	ASO1757	Antisense	RNAdb
p28076	6.21677e-06	0.000604134	0.518629	99.3569	162.915	129.625	59.1447	31.7979	112.306	nc-HOXD10-8	2	+	176800324	176802113	1789	1	nc-HOXD10-8	Antisense	HOX Loci
p21060	0.361246	0.00427881	0.518966	89.2611	77.6843	58.5446	58.4004	0.597699	58.0235	TCONS_00003590	2	+	18825463	19125152	299689	3	XLOC_001374	Intergenic	HumanLincRNACatalog
p3012	0.00133057	0.00363052	0.51917	110.627	121.21	3.87855	11.8722	50.8098	59.6945	ENST00000529070.1	11	+	133902546	133908870	6324	2	ENSG00000204241.3	Intergenic	ENSEMBL
p5840	1.19047e-07	0.00155221	0.5193	79.7267	77.7145	56.6091	12.707	13.0616	85.3877	ENST00000576943.1	16	-	3160512	3162490	1978	2	ENSG00000263214.1	Divergent	ENSEMBL
p20653	4.14638e-07	0.0319392	0.519397	81.776	5.85351	84.1072	22.1061	0.12501	66.9684	TCONS_00026882	19	+	8008905	8014249	5344	2	XLOC_012945	Divergent	HumanLincRNACatalog
p16270	0.00196119	0.00152377	0.519821	82.3526	26.0478	93.8073	16.4429	49.1822	39.4868	ENST00000520849.1	8	+	89340072	89341696	1624	2	ENSG00000253553.1	Divergent	ENSEMBL
p24745	0.00194732	2.34982e-21	0.520635	117.747	163.43	96.8657	3.30326	87.5633	105.956	TCONS_00017579	Y	+	24585739	24587584	1845	3	XLOC_008300	Intergenic	HumanLincRNACatalog
p19317	0.000995922	9.18476e-07	0.520643	80.1149	86.4541	80.338	8.81613	52.0883	67.646	TCONS_00022750	14	-	54854659	54859274	4615	2	XLOC_011030	Intergenic	HumanLincRNACatalog
p6630	1.76262e-05	2.40165e-10	0.522783	615.164	953.958	700.157	164.52	521.233	500.586	ENST00000572404.1	17	-	1946193	1946719	526	2	ENSG00000262533.1	Antisense	ENSEMBL
p19321	2.95818e-05	0.000214711	0.52288	75.6465	82.8489	98.7572	31.8519	55.0204	47.64	TCONS_00022755	14	-	56980667	56982038	1371	2	XLOC_011038	Intergenic	HumanLincRNACatalog
p2340	3.0405e-07	0.360465	0.522912	636.127	173.481	957.867	382.865	145.859	395.509	ENST00000537965.1	11	-	62621839	62622960	1121	3	ENSG00000255717.1	Divergent	ENSEMBL
p27175	0.0034249	0.00354715	0.523235	83.0483	73.4647	39.3827	22.7289	4.49421	75.2765	uc.353+	13	+	72771552	72771875	323	1	uc.353+	Intergenic	UCR
p30128	0.0282665	1.60308e-07	0.523382	114.357	8.32057	188.312	32.3395	0.185751	130.241	NR_015450.1	4	-	13547699	13549448	1749	1	LOC285548	Intergenic	RefSeq
p3046	4.69201e-07	1.05522e-06	0.524201	697.829	937.261	676.207	39.7891	598.121	573.673	ENST00000547042.1	12	-	2906301	2913104	6803	2	ENSG00000258092.1	Antisense	ENSEMBL
p3477	2.22408e-08	0.0047881	0.52501	81.5866	44.7984	82.5181	8.24782	11.3373	90.091	ENST00000535133.1	12	-	131953855	131977496	23641	3	ENSG00000256209.1	Intergenic	ENSEMBL
p10505	1.26744e-05	0.00257854	0.525383	73.7728	63.4694	40.7028	4.92672	25.4082	63.1543	ENST00000567259.1	20	-	61758846	61760811	1965	1	ENSG00000260416.1	Intergenic	ENSEMBL
p19444	0.6133	0.673426	0.526266	125.034	155.33	189.314	67.9638	72.7609	106.451	TCONS_00022972	14	+	39901833	39939958	38125	2	XLOC_010811	Divergent	HumanLincRNACatalog
p24194	0.20212	0.736406	0.526476	769.127	777.616	716.512	66.817	404.964	719.769	TCONS_00015324	8	+	94507988	94508523	535	2	XLOC_006872	Intergenic	HumanLincRNACatalog
p29215	1.65432e-05	2.36364e-10	0.526627	79.6299	26.5933	70.7166	4.52603	17.7565	70.8987	ENST00000601338.1	19	-	23586013	23598876	12863	4	ENSG00000269416.1	Intergenic	ENSEMBL
p22114	0.173751	0.00113186	0.526758	205.068	213.969	183.403	143.874	1.53008	171.935	TCONS_00006136	3	+	101713657	101715502	1845	2	XLOC_002741	Intergenic	HumanLincRNACatalog
p7803	3.29796e-06	1.08702e-09	0.527203	61.7263	76.1554	76.0863	42.4578	24.5212	45.8256	ENST00000581940.1	18	-	68883939	68904338	20399	4	ENSG00000265484.1	Intergenic	ENSEMBL
p17372	0.407475	0.000176701	0.527518	8436.88	3294.61	4667.62	81.6013	1672.32	6896.91	TCONS_00000487	1	-	24863137	24865371	2234	2	XLOC_000744	Antisense	HumanLincRNACatalog
p7894	0.0051823	3.57932e-14	0.527819	98.8346	105.594	113.098	2.31379	34.4552	130.828	ENST00000580891.1	18	+	9506239	9509724	3485	1	ENSG00000266805.1	Intronic	ENSEMBL
p26621	1.26109e-06	0.000476189	0.527851	65.1244	71.0985	80.3349	29.79	48.2738	36.2465	HIT000333391	10	+	80486247	80486547	300	1	HIX0058847	Intergenic	H-InvDB
p6060	3.33671e-06	8.81758e-09	0.528233	60.8186	90.7395	89.3986	37.8611	50.6688	38.7515	ENST00000562742.1	16	-	65210053	65210616	563	2	ENSG00000259847.1	Intergenic	ENSEMBL
p22716	7.41648e-05	1.69163e-06	0.528999	295.131	311.969	329.431	98.4725	249.38	147.571	TCONS_00010338	5	-	54913806	54916463	2657	3	XLOC_004827	Intergenic	HumanLincRNACatalog
p21421	7.13218e-09	2.18135e-10	0.529328	95.0362	129.61	100.613	40.7533	19.0637	112.352	TCONS_00028667	20	-	38283979	38289630	5651	3	XLOC_013742	Intergenic	HumanLincRNACatalog
p4893	0.598876	0.00090131	0.531483	86.6188	31.4363	39.4852	10.5594	11.3547	61.816	ENST00000555106.1	14	+	75734181	75738653	4472	3	ENSG00000258820.1	Intergenic	ENSEMBL
p18527	0.13173	8.55201e-07	0.53188	87.9212	80.2797	72.6708	7.27697	58.376	62.4619	TCONS_00019986	11	+	102511868	102548516	36648	2	XLOC_009261	Intergenic	HumanLincRNACatalog
p15036	0.00372224	5.28471e-09	0.532995	95.7033	191.638	56.5592	29.9115	89.1666	64.2193	ENST00000453666.1	7	-	104558006	104567077	9071	3	ENSG00000225329.1	Intergenic	ENSEMBL
p18127	0.252947	0.662029	0.533477	299.08	96.0562	476.113	249.492	26.316	188.984	TCONS_00018175	10	+	43916036	43918820	2784	2	XLOC_008467	Intergenic	HumanLincRNACatalog
p16730	0.402026	0.00207674	0.533509	621.957	344.835	623.675	6.53461	117.651	724.343	ENST00000458036.1	9	+	32552326	32567003	14677	2	ENSG00000235453.3	Antisense	ENSEMBL
p13529	7.66004e-05	2.75318e-06	0.534666	58.3072	69.7299	20.9861	17.5972	33.6296	28.4509	ENST00000518675.1	5	-	173217811	173236042	18231	2	ENSG00000254211.1	Intergenic	ENSEMBL
p6177	0.000148324	3.43777e-08	0.536406	102.527	189.859	142.727	44.1869	113.651	75.5594	ENST00000598933.1	16	-	85968886	85969829	943	2	ENSG00000268804.1	Intergenic	ENSEMBL
p25431	0.000309729	0.0017811	0.537257	98.6387	132.454	101.919	48.7791	50.2842	79.8496	XR_108752.1	7	-	25870910	25871467	557	2	LOC100506236	Intergenic	RefSeq
p9277	5.27432e-10	0.132627	0.538016	46.0693	81.1672	94.0753	84.3639	2.22604	32.4793	ENST00000445083.1	2	-	108784203	108834297	50094	5	ENSG00000225328.1	Intergenic	ENSEMBL
p22145	0.915908	0.494398	0.538162	75.4525	98.6858	64.5139	61.2707	24.3235	42.8394	TCONS_00006202	3	+	126006617	126010330	3713	2	XLOC_002797	Intergenic	HumanLincRNACatalog
p270	5.76975e-09	6.29481e-15	0.53915	95.4796	153.644	189.015	7.71119	23.1338	205.377	ENST00000415584.2	1	-	90090408	90098453	8045	3	ENSG00000231999.2	Divergent	ENSEMBL
p19858	4.68192e-07	2.69631e-11	0.539318	223.983	229.211	294.147	50.0986	82.2498	270.707	TCONS_00024571	16	-	4296494	4301920	5426	2	XLOC_011867	Intergenic	HumanLincRNACatalog
p12385	0.00928499	0.457276	0.539786	99.3277	154.476	9.55026	22.1475	81.8942	38.1131	ENST00000512915.1	4	-	103339873	103371167	31294	4	ENSG00000248161.1	Intergenic	ENSEMBL
p24511	0.00589602	0.0293646	0.539995	61.5341	89.8272	35.6672	52.7958	15.1098	33.0889	TCONS_00016663	9	+	109378367	109400533	22166	2	XLOC_007502	Intergenic	HumanLincRNACatalog
p16443	0.0473732	0.0236149	0.540434	65.7409	26.3438	24.3401	26.6109	8.7623	27.5468	ENST00000599229.1	9	-	2622089	2641395	19306	4	ENSG00000236404.4	Antisense	ENSEMBL
p23626	0.00136242	1.0718e-05	0.540575	213.664	251.356	220.449	179.786	84.9742	105.788	TCONS_00013136	7	-	19853307	19871039	17732	7	XLOC_006365	Intergenic	HumanLincRNACatalog
p26504	0.00158389	0.000172869	0.540956	85.7858	42.466	60.9671	3.22979	33.662	65.4673	uc004bdx.1	9	-	111921537	111922745	1208	1	AX747119	Intronic	UCSC
p17802	3.18325e-14	0.0203914	0.541234	57.6512	63.5118	85.1315	10.189	38.077	63.3875	TCONS_00001190	1	+	168756186	168758111	1925	2	XLOC_000455	Intergenic	HumanLincRNACatalog
p14656	0.0160656	9.83298e-05	0.541505	206.074	284.826	203.813	84.0739	65.061	227.055	ENST00000438298.2	6	+	111804743	111898363	93620	3	ENSG00000231889.2	Antisense	ENSEMBL
p20534	7.46492e-05	6.58714e-06	0.542324	59.0496	44.8121	14.4014	22.8358	9.02348	32.2777	TCONS_00026327	18	+	44337248	44340578	3330	2	XLOC_012667	Divergent	HumanLincRNACatalog
p29378	9.62216e-11	4.56769e-08	0.543981	5744.71	20.0153	3796.51	2730.45	993.427	1477.26	ENST00000509938.1	4	-	113567878	113569855	1977	3	ENSG00000249532.1	Antisense	ENSEMBL
p13381	0.0318567	0.649981	0.544361	316.39	433.728	183.285	99.4398	88.0721	320.597	ENST00000512500.1	5	-	125816102	125826063	9961	3	ENSG00000250602.1	Antisense	ENSEMBL
p29324	9.40766e-06	1.03252e-09	0.544749	62.4532	1.0541	65.4221	43.47	0.213327	26.5508	ENST00000424852.1	22	-	42760530	42765242	4712	2	ENSG00000229891.1	Intergenic	ENSEMBL
p17384	1.59899e-06	3.0166e-05	0.545765	117.305	197.103	104.718	65.7592	20.3774	142.608	TCONS_00001451	1	-	35081179	35083207	2028	2	XLOC_000781	Intergenic	HumanLincRNACatalog
p11734	0.000206219	0.0282121	0.545835	309.294	375.151	484.861	100.629	12.0846	525.534	ENST00000438418.2	3	+	18504171	18505831	1660	2	ENSG00000228956.3	Intergenic	ENSEMBL
p4982	0.0890697	2.00754e-08	0.546112	81.2193	87.4829	2.99209	13.1924	18.2036	62.3684	ENST00000557226.1	14	+	100800126	100820398	20272	2	ENSG00000258666.1	Antisense	ENSEMBL
p16797	7.5421e-10	0.0045092	0.546172	38.536	56.6304	82.2539	36.8813	37.2148	22.8057	ENST00000427901.1	9	+	74872251	74872699	448	2	ENSG00000235523.1	Intergenic	ENSEMBL
p26379	8.55804e-08	0.619805	0.546211	165.375	97.8017	190.254	52.0896	115.123	80.4566	uc003qqc.1	6	+	155184661	155230000	45339	2	AK124484	Intergenic	UCSC
p8572	5.28514e-09	5.23941e-11	0.546293	212.885	256.081	270.814	13.8472	46.4039	343.885	ENST00000592636.1	19	+	13041335	13044110	2775	3	ENSG00000266975.1	Antisense	ENSEMBL
p4230	0.00969909	0.46788	0.546376	95.7272	198.33	173.379	22.2866	158.874	74.2356	ENST00000599315.1	13	+	52028299	52126471	98172	5	ENSG00000236778.2	Intergenic	ENSEMBL
p25582	0.000132788	1.38406e-09	0.546845	60.6545	97.8059	32.2585	44.1177	34.4052	25.7706	NR_024280.1	9	+	92254697	92334674	79977	6	UNQ6494	Intergenic	RefSeq
p16131	1.99925e-07	3.26127e-11	0.549337	74.8658	42.1213	90.6776	29.8559	2.68518	81.5369	ENST00000476186.2	8	+	37980791	37982169	1378	2	ENSG00000240015.2	Intronic	ENSEMBL
p20210	0.00611323	3.84303e-10	0.54975	117.522	151.56	163.149	18.6951	86.1004	132.824	TCONS_00025746	17	-	70022038	70032010	9972	2	XLOC_012564	Intergenic	HumanLincRNACatalog
p8641	1.17125e-07	5.84756e-12	0.550063	306.649	116.135	359.191	120.208	129.354	180.575	ENST00000590628.1	19	+	28284401	28297690	13289	2	ENSG00000267575.1	Intergenic	ENSEMBL
p16269	0.00095446	0.601775	0.551369	77.7309	55.4081	27.029	2.12406	11.3444	74.8432	ENST00000523254.1	8	+	89339064	89554980	215916	3	ENSG00000253553.1	Antisense	ENSEMBL
p5739	8.49106e-06	1.86267e-08	0.551494	62.5697	89.9079	69.9062	41.7499	36.5531	44.3404	ENST00000554466.1	15	+	93855785	94073491	217706	3	ENSG00000257060.2	Intergenic	ENSEMBL
p23700	9.93335e-11	0.000911534	0.551891	2770.84	4735	4295.45	4322.61	232.735	1957.68	TCONS_00013917	7	-	104653772	104654516	744	2	XLOC_006554	Divergent	HumanLincRNACatalog
p5216	0.0172407	5.64642e-09	0.552132	677.083	700.156	628.405	170.059	198.819	738.501	ENST00000565387.1	15	-	66782085	66784447	2362	2	ENSG00000261351.1	Antisense	ENSEMBL
p29308	0.0862846	0.0557518	0.55271	75.5771	93.9614	49.7388	83.6763	10.82	26.7004	ENST00000602620.1	21	+	17792774	17979457	186683	4	ENSG00000215386.6	Intergenic	ENSEMBL
p10963	0.478273	1.90164e-06	0.55286	110.113	157.224	193.746	120.373	82.7344	51.8063	ENST00000602816.1	22	-	24080864	24081476	612	1	ENSG00000270041.1	Intergenic	ENSEMBL
p7318	7.59795e-07	3.73985e-10	0.555405	1304.5	1431.14	559.082	858.012	172.102	799.792	ENST00000585387.1	17	+	33640682	33651919	11237	4	ENSG00000267364.1	Intergenic	ENSEMBL
p23278	0.000150831	1.89633e-05	0.555598	78.9086	68.6187	40.4569	22.8386	9.42141	72.1836	TCONS_00012290	6	-	137992330	137994453	2123	2	XLOC_005847	Intergenic	HumanLincRNACatalog
p22336	0.0058624	0.0931999	0.556145	164.517	152.64	199.582	23.9409	62.1482	201.292	TCONS_00008565	4	-	122484905	122486182	1277	2	XLOC_004059	Intergenic	HumanLincRNACatalog
p1904	0.406	9.41336e-06	0.557561	73.4851	86.9598	51.445	54.6704	21.4688	42.0024	ENST00000415731.2	10	+	32555216	32558402	3186	2	ENSG00000227253.2	Antisense	ENSEMBL
p22482	0.0046295	9.27358e-11	0.557776	74.1604	77.7651	43.3574	3.18222	41.6187	64.1233	TCONS_00008044	4	+	38281623	38289085	7462	2	XLOC_003508	Intergenic	HumanLincRNACatalog
p20438	3.64373e-07	6.00238e-07	0.558181	137.052	70.8937	194.26	138.716	15.9037	69.884	TCONS_00026540	18	-	59273533	59274165	632	2	XLOC_012861	Intergenic	HumanLincRNACatalog
p25034	1.50037e-08	0.000672461	0.55881	46.8299	17.0981	15.2419	6.72723	17.832	19.6818	XR_109239.1	16	+	757312	759437	2125	1	GS52	Intergenic	RefSeq
p27870	0.128604	2.6759e-05	0.559493	85.1032	72.5738	36.4591	48.9762	19.8371	39.8045	hox-HOXA13-27	7	+	27009738	27011310	1572	1	hox-HOXA13-27	Intergenic	HOX Loci
p10642	0.00920047	1.39884e-12	0.559691	111.136	199.51	16.9913	28.5921	66.7176	88.0658	ENST00000439507.1	20	+	58663002	58676427	13425	4	ENSG00000228340.1	Intergenic	ENSEMBL
p15616	0.000386002	0.00689878	0.56037	328.059	389.47	159.799	127.722	153.374	210.533	ENST00000517384.1	8	-	22423509	22424684	1175	2	ENSG00000254230.1	Antisense	ENSEMBL
p14017	0.00867556	1.7424e-11	0.560586	64.7218	61.619	58.3696	12.7968	41.5761	49.173	ENST00000519755.1	5	+	172381909	172384165	2256	3	ENSG00000254295.1	Intergenic	ENSEMBL
p7140	0.00183223	0.00329408	0.560624	715.091	649.111	27.6004	199.434	31.1147	549.728	ENST00000413077.1	17	+	5015226	5017672	2446	3	ENSG00000234327.2	Antisense	ENSEMBL
p28622	0.227188	1.0082e-08	0.561062	1233.58	1045.69	1422.25	445.309	212.864	1418.61	ASO1810	None	None	None	None	#VALUE!	None	ASO1810	Antisense	RNAdb
p29290	0.474125	1.97291e-11	0.561582	170.841	189.678	140.672	44.1057	76.2811	161.074	ENST00000415889.2	20	-	43285091	43324737	39646	6	ENSG00000132832.5	Intergenic	ENSEMBL
p22200	0.807275	0.116217	0.562015	124.86	82.8271	177.227	9.84362	116.06	90.424	TCONS_00006313	3	+	174176207	174177068	861	2	XLOC_002925	Intergenic	HumanLincRNACatalog
p17476	1.15256e-10	3.11097e-09	0.562125	195.535	275.771	194.175	86.5607	8.39364	279.129	TCONS_00001623	1	-	109621257	109627542	6285	3	XLOC_000951	Intergenic	HumanLincRNACatalog
p23690	1.88393e-05	2.13323e-06	0.562324	92.5607	146.933	161.624	83.5902	45.923	96.0451	TCONS_00013891	7	-	96250838	96276378	25540	2	XLOC_006529	Intergenic	HumanLincRNACatalog
p29015	0.0296957	1.99406e-07	0.562822	167.66	173.592	113.268	135.996	68.0264	51.7914	ENST00000593568.1	10	+	67330632	67375515	44883	4	ENSG00000228065.4	Intergenic	ENSEMBL
p11551	0.0216493	0.0228328	0.563779	93.2833	197.491	54.2405	51.102	76.2606	67.1495	ENST00000487827.1	3	-	152874299	152879564	5265	2	ENSG00000244268.1	Divergent	ENSEMBL
p9618	1.0216e-06	1.50022e-12	0.563827	106.72	89.3736	128.018	1.28044	52.6438	128.819	ENST00000567549.1	2	-	243029504	243030608	1104	1	ENSG00000261186.1	Intergenic	ENSEMBL
p25019	0.805572	0.0114973	0.564901	326.326	446.757	389.482	229.291	98.8305	328.612	NR_022008.1	15	+	25230006	25233379	3373	1	PAR5	Intergenic	RefSeq
p13418	0.0386577	3.06113e-05	0.564924	77.5207	93.2843	94.322	82.2275	17.5223	50.0268	ENST00000514616.1	5	-	137150021	137225006	74985	5	ENSG00000250159.1	Antisense	ENSEMBL
p7538	8.42301e-08	5.41512e-10	0.565954	6262.79	4023.99	3928.96	416.667	2735.76	4893.04	ENST00000587434.1	17	+	76851559	76851926	367	1	ENSG00000267601.1	Antisense	ENSEMBL
p10725	0.274504	8.45555e-08	0.566196	74.4103	71.6067	97.0859	44.2909	67.5783	25.7748	ENST00000420356.1	21	-	34285956	34443410	157454	2	ENSG00000227757.1	Antisense	ENSEMBL
p7449	0.11435	8.60501e-11	0.566257	78.8477	39.787	88.5191	7.94315	25.5452	83.814	ENST00000590850.1	17	+	57862173	57862396	223	1	ENSG00000267637.1	Intronic	ENSEMBL
p21213	0.690695	2.13389e-06	0.566563	313.248	220.084	214	39.744	35.0585	348.609	TCONS_00003843	2	+	123223598	123229226	5628	2	XLOC_001649	Intergenic	HumanLincRNACatalog
p9520	0.0112756	0.9301	0.567736	80.0281	87.7693	84.9076	22.5946	14.5763	106.299	ENST00000421964.1	2	-	208733305	208734639	1334	2	ENSG00000225111.1	Intronic	ENSEMBL
p13176	0.519117	0.00227263	0.568871	104.213	163.595	146.801	94.7857	75.2956	65.7785	ENST00000596137.1	5	-	54318456	54328394	9938	6	ENSG00000240535.3	Antisense	ENSEMBL
p24646	1.07258e-10	1.93708e-07	0.569937	5003.98	3236.87	3152.68	768.545	2182.63	3542.42	TCONS_00017366	X	-	119358264	119379088	20824	3	XLOC_008225	Intergenic	HumanLincRNACatalog
p4550	4.43731e-07	2.33246e-06	0.570347	50.1035	36.8989	58.5456	15.557	43.2114	24.2446	ENST00000556640.1	14	-	64889652	64915275	25623	2	ENSG00000258824.1	Antisense	ENSEMBL
p6592	0.466314	4.72105e-12	0.570419	82.7075	65.3044	74.5842	73.0269	3.00012	50.9461	ENST00000566114.1	16	+	88808038	88808775	737	2	ENSG00000260617.1	Antisense	ENSEMBL
p29936	0.000104412	0.00158563	0.570683	51.3367	97.0773	59.8449	13.9663	82.4165	22.467	TCONS_00012825	6	-	166315364	166324507	9143	2	XLOC_005918	Intergenic	HumanLincRNACatalog
p28536	3.58423e-07	1.19126e-11	0.571304	6201.27	3411.19	4597.34	3038.39	53.0768	5026.65	ASO1883	None	None	None	None	#VALUE!	None	ASO1883	Antisense	RNAdb
p26865	0.685679	0.00286857	0.57218	135.825	151.964	87.9363	133.11	0.102737	81.7703	HIT000196023	5	+	74632743	74633089	346	1	HIX0004954	Antisense	H-InvDB
p3369	0.0219364	1.67579e-09	0.572281	102.175	182.603	130.972	161.285	34.6459	41.9939	ENST00000578927.1	12	-	109171967	109174194	2227	1	ENSG00000264043.1	Intergenic	ENSEMBL
p29541	1.17379e-12	4.85889e-09	0.57272	101.958	158.158	186.954	51.5047	85.4366	119.105	ENST00000568809.1	X	+	99928326	99928978	652	1	ENSG00000261295.1	Divergent	ENSEMBL
p2671	0.00204225	1.32603e-06	0.573046	83.7691	72.4326	48.4651	21.6043	29.5833	66.0958	ENST00000527285.1	11	+	18728083	18762115	34032	3	ENSG00000254966.1	Antisense	ENSEMBL
p10781	5.60856e-09	0.000113292	0.5739	57.6999	57.5745	76.8324	40.345	37.166	32.7391	ENST00000569966.1	21	-	46414276	46415100	824	1	ENSG00000261706.1	Intergenic	ENSEMBL
p116	2.90827e-12	0.0764937	0.5741	40.0013	33.3916	43.7808	21.3188	12.3938	33.5568	ENST00000436991.1	1	-	25971034	25985602	14568	2	ENSG00000233478.1	Intronic	ENSEMBL
p18745	5.1333e-08	0.513016	0.574721	64.8489	56.4907	79.3271	43.5568	30.2817	41.4888	TCONS_00020988	12	-	128151535	128155451	3916	2	XLOC_010253	Intergenic	HumanLincRNACatalog
p30215	0.324037	0.00865123	0.575625	196.819	14.3901	121.802	6.7227	47.5354	137.431	uc010yfd.1	19	+	55043908	55055195	11287	8	KIR3DX1	Intergenic	UCSC
p9290	2.76324e-09	4.93777e-10	0.575957	5198.18	3821.43	2504.98	1695.31	926.716	4015.64	ENST00000409569.2	2	-	112186885	112252663	65778	2	ENSG00000172965.7	Intergenic	ENSEMBL
p21436	0.000413655	4.02578e-11	0.57626	50.6638	63.5166	85.6758	1.40458	88.3181	25.4464	TCONS_00028420	20	-	46606964	46617716	10752	3	XLOC_013772	Intergenic	HumanLincRNACatalog
p15965	8.5926e-08	0.0630769	0.576517	645.467	954.092	332.833	112.287	600.15	401.619	ENST00000520885.1	8	-	142136142	142138220	2078	2	ENSG00000253210.1	Divergent	ENSEMBL
p33416	0.00324403	0.0177717	0.576601	324.615	248.41	441.848	60.5169	132.341	392.318	ENST00000556354.1	14	+	23980968	24028369	47401	5	ENSG00000157306.10	Antisense	ENSEMBL
p7356	0.000876585	1.20934e-13	0.576613	298.283	396.658	239.646	237.157	107.458	194.28	ENST00000577557.1	17	+	38681812	38683254	1442	2	ENSG00000266088.1	Intergenic	ENSEMBL
p22582	9.30563e-05	6.84671e-07	0.577318	101.645	177.249	167.563	22.8822	102.612	132.253	TCONS_00008289	4	+	152720584	152754128	33544	3	XLOC_003735	Intergenic	HumanLincRNACatalog
p15411	0.00816158	0.020349	0.577881	127.189	108.515	184.219	160.233	12.4582	69.9743	ENST00000416502.1	7	+	95225993	95236456	10463	2	ENSG00000231170.1	Divergent	ENSEMBL
p16159	8.49709e-06	2.40601e-08	0.578036	284.642	431.254	407.549	105.053	173.627	370.712	ENST00000520357.1	8	+	52812274	52825698	13424	2	ENSG00000228801.5	Divergent	ENSEMBL
p9912	0.0987274	4.40621e-13	0.578859	64.1763	15.6512	83.1461	43.7786	24.3811	26.1791	ENST00000452354.1	2	+	100824715	100867946	43231	3	ENSG00000232084.1	Intergenic	ENSEMBL
p5597	7.35922e-08	7.26218e-10	0.578952	57.7957	73.2662	69.2854	35.2467	29.5732	51.1716	ENST00000558104.1	15	+	60973767	60979087	5320	2	ENSG00000259482.1	Intronic	ENSEMBL
p2752	0.0329712	2.53084e-09	0.579285	669.499	889.579	994.831	60.8564	539.311	879.274	ENST00000596169.1	11	+	45392963	45393676	713	1	ENSG00000255267.2	Intergenic	ENSEMBL
p15825	1.45728e-09	1.64899e-08	0.579329	137.045	160.421	62.5806	23.3449	4.52816	180.713	ENST00000521199.1	8	-	92555151	92919847	364696	4	ENSG00000253901.1	Intergenic	ENSEMBL
p513	4.35705e-08	2.59159e-09	0.579939	58.2626	45.7575	90.269	48.0238	23.8418	40.8102	ENST00000448643.1	1	-	166356963	166421869	64906	3	ENSG00000225325.1	Intergenic	ENSEMBL
p23331	5.2356e-05	0.054555	0.580048	61.6853	61.9974	79.1939	80.1312	6.06288	31.4841	TCONS_00012376	6	-	170401012	170442052	41040	3	XLOC_005943	Intergenic	HumanLincRNACatalog
p29452	0.572969	9.82632e-08	0.580168	4274.37	1876.25	2546.7	198.752	335.807	4511.34	ENST00000434399.1	7	-	30555924	30602441	46517	5	ENSG00000196295.6	Intergenic	ENSEMBL
p8146	0.00622845	9.76972e-10	0.580349	107.724	41.1376	174.576	59.4517	49.0623	79.1925	ENST00000587632.1	19	-	5561642	5567842	6200	3	ENSG00000223573.2	Intergenic	ENSEMBL
p17783	0.187437	0.401615	0.580601	285.244	205.441	332.543	194.973	34.7475	248.247	TCONS_00001137	1	+	143231331	143232085	754	2	XLOC_000380	Intergenic	HumanLincRNACatalog
p12910	4.39353e-05	2.48117e-05	0.581086	1037.81	531.041	1308.07	448.346	881.786	341.607	ENST00000499587.2	4	+	144621409	144786225	164816	7	ENSG00000246448.2	Antisense	ENSEMBL
p24373	0.000193183	0.000116067	0.581431	77.0101	61.9294	20.2647	40.0042	6.79053	45.7715	TCONS_00016481	9	-	131097665	131100554	2889	2	XLOC_007860	Intergenic	HumanLincRNACatalog
p21776	1.99695e-05	1.39685e-08	0.581712	219.424	257.537	289.152	101.596	26.0132	318.049	TCONS_00029527	22	+	23834997	23838909	3912	2	XLOC_014172	Intergenic	HumanLincRNACatalog
p21341	1.79394e-06	7.45725e-12	0.582061	58.9893	52.7037	39.7319	59.5837	0.431519	28.1233	TCONS_00004050	2	+	229554324	229579362	25038	3	XLOC_001892	Intergenic	HumanLincRNACatalog
p23884	2.50064e-08	9.28832e-11	0.582477	64.7372	64.8655	36.8146	16.1099	17.6394	63.185	TCONS_00013636	7	+	153119375	153120601	1226	2	XLOC_006298	Intergenic	HumanLincRNACatalog
p7701	1.2271e-08	4.93768e-07	0.583845	284.103	311.786	456.961	88.261	61.1089	465.331	ENST00000591558.1	18	-	31132086	31158151	26065	2	ENSG00000267642.1	Divergent	ENSEMBL
p23420	7.53786e-14	3.164e-05	0.583934	41.6612	86.0322	55.6756	34.1659	37.9845	34.9251	TCONS_00011755	6	+	27012401	27026687	14286	2	XLOC_005217	Intergenic	HumanLincRNACatalog
p17005	0.00230735	3.32596e-07	0.584651	88.7662	77.1698	65.7183	3.12749	50.4199	81.8896	ENST00000437466.1	X	-	41907135	41914089	6954	2	ENSG00000233103.1	Intergenic	ENSEMBL
p9565	0.000681949	0.0402495	0.584721	1065.33	1045.59	1216.94	233.381	248.903	1463.58	ENST00000415174.1	2	-	231555635	231565244	9609	4	ENSG00000226125.1	Intergenic	ENSEMBL
p21305	0.0666911	0.0327555	0.585146	81.8677	93.7907	93.8929	50.8627	45.8088	61.0555	TCONS_00004010	2	+	215674994	215698897	23903	2	XLOC_001836	Divergent	HumanLincRNACatalog
p27866	0.0140291	0.00321857	0.586152	204.198	120.765	38.4891	1.07995	66.2432	145.715	hox-HOXA1-1	7	+	26906186	26907175	989	1	hox-HOXA1-1	Intergenic	HOX Loci
p9344	0.00568576	0.0548892	0.587045	86.5321	56.2241	83.8712	41.8324	47.9544	43.2538	ENST00000537615.1	2	-	135624631	135676176	51545	5	ENSG00000224043.3	Antisense	ENSEMBL
p7961	9.83493e-11	2.67632e-12	0.587225	3928.04	283.473	4692.35	809.028	2380.29	2039.25	ENST00000583184.1	18	+	29598791	29691742	92951	5	ENSG00000263917.1	Antisense	ENSEMBL
p25036	3.72468e-05	1.42675e-05	0.587739	80.2441	0.0718993	67.0542	13.0217	5.71066	67.8828	XR_109251.1	16	+	6427284	6429682	2398	1	LOC440337	Intronic	RefSeq
p9489	3.37478e-05	2.36118e-07	0.58785	76.334	75.4529	18.2047	15.5944	14.8848	69.4504	ENST00000456031.1	2	-	199747296	199936514	189218	3	ENSG00000231557.1	Intergenic	ENSEMBL
p8324	0.0319914	1.91085e-11	0.588727	109.241	187.376	31.4868	101.815	60.315	31.0338	ENST00000589968.1	19	-	36870252	36871814	1562	2	ENSG00000267363.1	Divergent	ENSEMBL
p17091	3.58064e-09	7.20034e-08	0.588909	58.2077	92.6152	42.8347	10.3597	60.0071	43.6799	ENST00000456631.1	X	-	136638349	136646084	7735	3	ENSG00000224765.1	Intergenic	ENSEMBL
p21604	1.18604e-05	2.56362e-12	0.588968	65.4695	97.2812	65.7328	35.3093	57.7964	41.4637	TCONS_00029080	21	-	16134079	16135509	1430	2	XLOC_014003	Intergenic	HumanLincRNACatalog
p23417	0.726331	0.0134041	0.589396	198.04	264.029	191.405	117.599	121.626	145.929	TCONS_00011750	6	+	26677159	26688056	10897	2	XLOC_005214	Intergenic	HumanLincRNACatalog
p1636	0.26055	0.309298	0.589479	412.599	659.344	761.486	647.121	29.1608	404.487	ENST00000456638.1	10	-	75556275	75561157	4882	4	ENSG00000236370.1	Antisense	ENSEMBL
p30061	0.307757	4.66267e-10	0.589754	399.958	325.681	748.205	119.844	250.38	498.981	NR_073170.1	12	+	29542226	29617863	75637	3	LOC101055625	Antisense	RefSeq
p33395	7.16184e-13	0.619458	0.591118	2908.26	2190.02	2707.22	1923.09	940.529	1750.35	ENST00000530809.1	11	+	118944531	118948357	3826	3	ENSG00000160695.9	Antisense	ENSEMBL
p1368	4.50105e-06	7.04308e-08	0.5913	61.1792	74.5088	9.30794	22.3831	30.7798	32.5733	ENST00000412871.1	1	+	211813036	211827923	14887	2	ENSG00000227764.1	Intergenic	ENSEMBL
p1862	3.89213e-05	0.0735348	0.591426	77.4164	85.2949	13.082	12.4057	38.8864	52.6766	ENST00000449462.1	10	+	13771382	13798200	26818	3	ENSG00000234091.1	Antisense	ENSEMBL
p18816	0.337591	8.57391e-07	0.591865	1121.2	1277.42	788.816	420.707	55.4153	1410.41	TCONS_00021094	12	+	30952892	30954846	1954	3	XLOC_009702	Intergenic	HumanLincRNACatalog
p6346	0.00654615	1.38005e-06	0.592706	204.653	126.604	225.878	8.61022	127.408	194.2	ENST00000450909.3	16	+	29938156	29940254	2098	2	ENSG00000247735.2	Divergent	ENSEMBL
p15051	1.30683e-10	1.37692e-10	0.592907	400.152	790.164	639.796	695.078	221.037	168.97	ENST00000457510.2	7	-	107383261	107384573	1312	2	ENSG00000241764.2	Antisense	ENSEMBL
p20548	2.69731e-08	2.63354e-12	0.59318	97.8929	135.568	187.239	35.9943	3.23919	210.317	TCONS_00026215	18	+	55471011	55474049	3038	2	XLOC_012692	Divergent	HumanLincRNACatalog
p12053	2.41951e-10	1.98337e-09	0.593656	41.3512	48.4959	92.5236	20.2802	28.5309	59.4543	ENST00000460796.1	3	+	156893011	156957753	64742	2	ENSG00000243176.1	Intergenic	ENSEMBL
p2432	7.04365e-12	4.39634e-05	0.593998	62.9548	79.7507	30.7793	2.61793	9.93023	90.5015	ENST00000528233.1	11	-	77449724	77450613	889	2	ENSG00000255409.1	Intronic	ENSEMBL
p2542	5.11833e-10	0.00183128	0.594184	99.5338	137.029	151.053	12.2746	99.698	118.343	ENST00000531470.2	11	-	121937043	121940864	3821	4	ENSG00000255248.2	Intergenic	ENSEMBL
p5396	0.000716997	3.19972e-11	0.59431	57.5228	6.41213	65.5086	33.9038	12.8587	30.1671	ENST00000560221.1	15	-	99190179	99190600	421	2	ENSG00000259424.1	Intergenic	ENSEMBL
p25622	6.79921e-06	8.84683e-17	0.595279	226.59	262.455	184.739	10.5875	38.3707	352.132	NR_026711.1	X	+	1519423	1534314	14891	6	ASMTL-AS1	Antisense	RefSeq
p12941	0.00058768	3.44488e-05	0.595316	164.677	100.398	151.334	161.631	5.27681	80.9868	ENST00000598252.1	4	+	156226118	156281498	55380	5	ENSG00000250910.2	Antisense	ENSEMBL
p9562	6.8296e-05	3.778e-09	0.595389	61.9772	98.452	93.5541	49.5993	69.2852	32.3344	ENST00000442062.1	2	-	229548252	229549296	1044	2	ENSG00000228226.1	Intergenic	ENSEMBL
p15814	0.000329987	2.54447e-06	0.595663	306.367	355.482	281.637	60.8943	241.683	259.423	ENST00000504145.1	8	-	90729655	90769939	40284	5	ENSG00000251136.3	Divergent	ENSEMBL
p5475	5.01887e-10	3.92822e-10	0.596429	4329.07	1932.02	2554.95	624.381	2668.89	1964.86	ENST00000602663.1	15	+	30780165	30782516	2351	1	ENSG00000270055.1	Intergenic	ENSEMBL
p4527	5.37703e-10	1.28445e-06	0.596489	4514.82	645.912	3632.21	1405.26	550.813	3288.82	ENST00000551597.2	14	-	58752449	58764850	12401	4	ENSG00000257621.2	Divergent	ENSEMBL
p24358	1.38935e-05	0.000462112	0.596812	58.0601	68.7457	94.3457	37.4766	69.831	24.6783	TCONS_00016859	9	-	117418588	117425007	6419	2	XLOC_007832	Intergenic	HumanLincRNACatalog
p11210	2.18548e-07	4.56597e-09	0.596891	108.199	64.1242	134.025	57.2866	12.4095	113.161	ENST00000434516.1	22	+	39688992	39691568	2576	2	ENSG00000224794.1	Intergenic	ENSEMBL
p9394	1.32753e-10	9.35765e-07	0.596899	1145.71	944.562	637.769	48.7418	936.976	642.645	ENST00000425636.2	2	-	169628462	169642939	14477	3	ENSG00000227617.3	Antisense	ENSEMBL
p21570	2.13456e-08	1.27469e-15	0.597369	727.105	671.565	951.23	147.003	27.2365	1229.52	TCONS_00028227	20	+	52464583	52466442	1859	2	XLOC_013570	Intergenic	HumanLincRNACatalog
p23697	0.0147947	0.0110998	0.597869	77.7031	64.5938	58.6667	59.1491	15.9801	45.0208	TCONS_00013910	7	-	103642281	103672626	30345	2	XLOC_006551	Intergenic	HumanLincRNACatalog
p7091	1.99814e-06	7.61594e-06	0.598495	203.813	220.227	240.312	17.2591	158.247	222.106	ENST00000596728.1	17	-	79352933	79353635	702	1	ENSG00000262223.2	Antisense	ENSEMBL
p15530	4.69092e-10	1.15391e-06	0.598738	111.815	188.06	189.078	32.6692	125.1	134.986	ENST00000569431.1	7	+	155192616	155194477	1861	1	ENSG00000260426.1	Intergenic	ENSEMBL
p16919	1.10221e-05	1.13862e-08	0.602503	322.404	362.174	375.239	81.6042	11.7138	545.225	ENST00000429139.1	9	+	127420745	127460910	40165	2	ENSG00000224020.1	Intronic	ENSEMBL
p5381	0.000122495	3.70221e-09	0.602748	75.2702	57.5126	79.0112	53.717	27.0161	46.9253	ENST00000557863.1	15	-	96826152	96870345	44193	4	ENSG00000247809.3	Antisense	ENSEMBL
p20393	0.0529275	1.40464e-12	0.603726	136.31	149.965	196.159	92.7841	113.858	84.6168	TCONS_00026679	18	-	12739783	12749484	9701	2	XLOC_012776	Intergenic	HumanLincRNACatalog
p21624	9.29252e-08	4.65849e-17	0.603979	92.463	113.642	110.363	36.9084	65.5606	88.6711	TCONS_00029153	21	-	44071700	44072723	1023	2	XLOC_014094	Intergenic	HumanLincRNACatalog
p9785	0.0389527	0.883304	0.604589	66.962	53.293	88.8695	45.2786	56.0972	25.0586	ENST00000432064.1	2	+	48132816	48134774	1958	2	ENSG00000233230.1	Antisense	ENSEMBL
p8368	0.344615	4.4739e-11	0.604615	219.318	190.877	168.069	24.2447	164.708	160.675	ENST00000592946.1	19	-	44609615	44617298	7683	2	ENSG00000186019.10	Antisense	ENSEMBL
p848	0.0138095	7.11535e-17	0.604722	137.543	3.27765	184.974	79.7334	30.6222	86.659	ENST00000404210.2	1	+	22352026	22357713	5687	4	ENSG00000218510.3	Intergenic	ENSEMBL
p21029	0.000668706	0.454163	0.605399	309.362	418.35	459.991	100.436	326.935	291.663	TCONS_00003550	2	+	3606077	3609391	3314	2	XLOC_001323	Divergent	HumanLincRNACatalog
p25782	0.44189	1.73852e-07	0.605615	79.169	42.7986	46.766	56.9283	10.9185	34.3407	uc001pen.1	11	-	93800139	93862566	62427	3	AF086184	Antisense	UCSC
p26534	0.865588	3.06882e-11	0.605748	300.619	219.188	275.116	49.0638	154.212	278.247	uc004bxt.1	9	+	132098802	132100574	1772	1	AX747401	Intergenic	UCSC
p5316	1.7341e-06	4.97989e-08	0.606015	49.3032	67.7319	55.04	8.23616	55.9654	40.0785	ENST00000567231.1	15	-	86648270	86659903	11633	4	ENSG00000260477.2	Intergenic	ENSEMBL
p20347	4.87432e-09	2.70043e-12	0.606469	116.643	108.815	198.749	21.8143	1.65792	233.796	TCONS_00025498	17	+	74803170	74819136	15966	2	XLOC_012313	Intergenic	HumanLincRNACatalog
p21950	2.00092e-10	5.10648e-09	0.606972	114.317	118.725	43.6039	37.5126	71.2147	59.189	TCONS_00006679	3	-	148164072	148173245	9173	3	XLOC_003276	Intergenic	HumanLincRNACatalog
p1608	6.50376e-05	1.19674e-10	0.607534	59.5912	28.1984	58.5188	0.257899	49.9952	38.6342	ENST00000435271.1	10	-	53004653	53005566	913	3	ENSG00000231132.1	Intronic	ENSEMBL
p17808	0.0207257	0.0517302	0.607576	60.7632	87.0848	84.9614	7.54728	92.0409	41.8612	TCONS_00001210	1	+	180100863	180103986	3123	2	XLOC_000476	Intergenic	HumanLincRNACatalog
p10836	4.56835e-06	7.7063e-05	0.608372	81.015	30.5646	72.099	33.6398	2.04317	76.062	ENST00000357401.3	21	+	27778261	27941571	163310	4	ENSG00000197934.4	Antisense	ENSEMBL
p26959	3.83255e-05	0.00280541	0.608392	57.5681	50.1938	85.2879	7.43436	69.8477	40.168	uc.8-	1	-	10851817	10852033	216	1	uc.8-	Intronic	UCR
p27646	2.79208e-13	0.000221064	0.608439	82.1791	92.1266	76.1066	22.2225	36.6935	93.4446	uc.195-	6	-	97663355	97663628	273	1	uc.195-	Intronic	UCR
p26724	2.09179e-06	1.79193e-09	0.608478	88.7336	6.20929	82.0773	2.4773	22.1794	83.0562	HIT000066872	17	+	42553217	42553604	387	1	HIX0039300	Intronic	H-InvDB
p6836	0.0300076	1.09513e-08	0.609698	93.2314	137.346	134.489	11.9996	151.771	58.8095	ENST00000436546.1	17	-	41031606	41050721	19115	5	ENSG00000213373.3	Intergenic	ENSEMBL
p29739	1.37538e-06	0.879386	0.610366	3808.46	4964.17	4116.12	821.973	924.525	6120.35	TCONS_00025712	17	-	58160924	58166557	5633	3	XLOC_012538	Intergenic	HumanLincRNACatalog
p13093	0.000856508	1.04878e-06	0.610372	58.8865	65.2458	18.7049	43.6253	22.3444	21.2142	ENST00000564167.1	5	-	14663211	14664384	1173	2	ENSG00000261360.1	Divergent	ENSEMBL
p14587	0.78044	0.000121614	0.610471	170.333	46.3171	157.752	72.3395	20.8549	135.367	ENST00000421315.1	6	+	73977773	74001063	23290	3	ENSG00000229852.2	Intronic	ENSEMBL
p8133	0.0224636	2.31532e-11	0.610483	89.1542	86.4723	87.8899	40.0445	98.7686	22.0592	ENST00000585980.1	19	-	3121113	3122126	1013	3	ENSG00000267688.1	Antisense	ENSEMBL
p7486	4.08545e-10	7.69544e-05	0.611084	62.1186	1.78514	96.8984	24.9785	16.0582	57.2269	ENST00000587241.1	17	+	67759817	67899141	139324	2	ENSG00000227517.2	Intergenic	ENSEMBL
p39	1.51176e-10	5.38839e-07	0.611454	74.1045	33.5916	85.8483	12.2581	20.882	85.2035	ENST00000429389.1	1	-	2730996	2731563	567	2	ENSG00000231630.1	Intergenic	ENSEMBL
p33561	1.51662e-07	0.527172	0.611721	218.019	148.208	288.551	173.738	129.186	97.6165	ENST00000514608.1	4	-	119990478	119991452	974	1	ENSG00000249356.1	Intergenic	ENSEMBL
p17128	0.0640914	7.8689e-07	0.611916	314.651	400.238	350.589	181.33	168.763	301.89	ENST00000602357.1	X	+	1522402	1532917	10515	3	ENSG00000236017.3	Antisense	ENSEMBL
p13771	0.707307	0.0192191	0.611997	640.593	908.075	615.647	375.683	11.9357	936.936	ENST00000511876.1	5	+	88185267	88201087	15820	3	ENSG00000248309.1	Antisense	ENSEMBL
p15833	1.59004e-07	3.46787e-05	0.612662	48.0696	88.6601	61.6398	43.7292	12.2265	65.5778	ENST00000523080.1	8	-	93887448	93891730	4282	1	ENSG00000248858.2	Intergenic	ENSEMBL
p26665	0.0599587	0.000142886	0.612831	40.92	81.9879	47.009	40.8141	40.5232	22.7931	HIT000071420	13	-	72287233	72287653	420	1	HIX0037395	Intronic	H-InvDB
p30060	0.000528202	1.91623e-12	0.613188	1173.71	1426.23	507.641	654.13	696.751	554.65	XR_171059.1	12	+	10705977	10711018	5041	2	LOC101060038	Intergenic	RefSeq
p24228	0.00568179	0.0868057	0.61361	681.709	535.128	900.587	138.485	340.7	820.088	TCONS_00014850	8	+	125288531	125289693	1162	2	XLOC_006915	Intergenic	HumanLincRNACatalog
p11872	0.0355589	3.14483e-11	0.613717	105.801	157.416	169.356	104.542	36.5758	124.36	ENST00000484679.1	3	+	78316089	78340341	24252	3	ENSG00000240241.1	Intergenic	ENSEMBL
p16138	0.0802266	1.74294e-12	0.61376	88.6614	80.565	49.4257	2.87453	65.3386	65.9867	ENST00000520185.1	8	+	39771747	39773240	1493	2	ENSG00000253838.1	Intronic	ENSEMBL
p26603	0.000170858	0.000357039	0.614598	1167.97	862.285	1002.62	200.721	581.126	1082.15	HIT000338244	1	+	222886169	222887245	1076	2	HIX0001617	Antisense	H-InvDB
p30166	3.24753e-09	1.3231e-12	0.614877	52.0052	97.0773	59.8449	13.9663	82.4165	32.0818	NR_024499.1	HG1459_PATCH	-	3433821	3446549	12728	2	FMR1-AS1	Intergenic	RefSeq
p25283	0.0124748	2.70543e-05	0.615142	220.901	203.047	218.12	67.8242	88.2524	238.886	XR_158774.1	3	+	139108650	139163446	54796	4	LOC100507291	Divergent	RefSeq
p19838	1.63282e-10	3.6754e-14	0.615355	104.776	149.297	62.0536	28.902	34.8923	130.736	TCONS_00023541	15	+	98083276	98101959	18683	5	XLOC_011374	Intergenic	HumanLincRNACatalog
p13886	0.00122798	0.894903	0.615446	324.395	342.99	141.117	51.4239	7.92711	438.239	ENST00000509051.1	5	+	132496129	132559995	63866	4	ENSG00000248245.1	Antisense	ENSEMBL
p24905	0.00012975	0.810037	0.615761	89.755	79.2581	17.0293	21.6191	1.20231	91.7363	NR_003012.1	12	-	6690638	6690775	137	1	SCARNA11	Intronic	RefSeq
p24168	0.000126128	3.77789e-10	0.615885	79.9866	65.2473	55.4787	48.3815	23.8194	51.4152	TCONS_00014745	8	+	67836940	67838589	1649	2	XLOC_006829	Intergenic	HumanLincRNACatalog
p8230	1.15665e-06	3.34525e-08	0.616242	7026.9	4326.87	1660.93	1893.34	1948.82	4178.04	ENST00000590606.1	19	-	20236185	20261357	25172	3	ENSG00000267383.2	Intergenic	ENSEMBL
p12489	1.43384e-10	6.55716e-09	0.616738	58.1802	12.412	96.1696	24.4226	19.376	59.0497	ENST00000515703.1	4	-	147031974	147032869	895	3	ENSG00000248809.1	Intergenic	ENSEMBL
p8204	9.03543e-06	2.23457e-09	0.617592	4180.22	3412.05	4696	3017.98	843.338	3727.82	ENST00000599360.1	19	-	17263425	17278861	15436	4	ENSG00000268056.1	Antisense	ENSEMBL
p5016	0.10565	5.07492e-10	0.618898	95.2502	127.501	118.184	15.9913	152.223	42.7905	ENST00000443252.3	14	+	101424598	101426536	1938	2	ENSG00000225746.3	Intergenic	ENSEMBL
p29719	3.95705e-05	2.27769e-14	0.619343	85.2885	72.954	76.9532	39.966	58.8172	46.8836	TCONS_00024766	16	-	86365205	86384207	19002	7	XLOC_012045	Intergenic	HumanLincRNACatalog
p23733	0.442901	1.16131e-11	0.619402	4431.41	3529.29	4325.44	994.383	2207.9	4407.77	TCONS_00013287	7	+	389256	390969	1713	3	XLOC_005955	Intergenic	HumanLincRNACatalog
p4041	0.00112482	0.000548741	0.620803	89.4507	3.08435	56.2482	5.54522	17.7552	69.0647	ENST00000433480.2	13	-	48870648	48877797	7149	3	ENSG00000231473.2	Divergent	ENSEMBL
p16166	0.0184905	0.0010623	0.620826	85.0656	37.3078	85.1816	19.465	37.4962	71.8945	ENST00000524425.1	8	+	54090146	54155243	65097	3	ENSG00000254687.1	Antisense	ENSEMBL
p14930	7.17869e-09	2.72047e-05	0.620915	342.026	210.992	499.88	144.73	27.7122	481.318	ENST00000425077.1	7	-	44824648	44826939	2291	2	ENSG00000228596.1	Intergenic	ENSEMBL
p3559	4.54099e-05	6.60237e-05	0.622009	66.1304	54.6446	86.8837	27.8203	49.1082	52.2371	ENST00000499291.2	12	+	11700963	11717337	16374	8	ENSG00000247157.2	Intergenic	ENSEMBL
p9676	0.157652	5.11469e-05	0.622125	304.912	324.459	366.208	211.378	52.0398	355.956	ENST00000414086.1	2	+	12739112	12745271	6159	4	ENSG00000223360.1	Intergenic	ENSEMBL
p4739	0.00049459	1.48938e-08	0.622148	104.061	54.2018	81.8303	29.0363	25.6034	94.7337	ENST00000535893.1	14	+	21989233	21990794	1561	2	ENSG00000257096.1	Antisense	ENSEMBL
p9600	1.11502e-10	0.575658	0.62224	50.3725	87.6949	64.6592	5.81139	92.1065	28.2267	ENST00000457178.1	2	-	241166976	241195452	28476	3	ENSG00000227479.1	Intergenic	ENSEMBL
p24163	8.09392e-05	0.0101719	0.622296	100.153	90.9465	188.59	29.2406	105.437	101.602	TCONS_00015286	8	+	64619953	64654862	34909	3	XLOC_006821	Intergenic	HumanLincRNACatalog
p25329	1.44725e-10	0.00203553	0.623152	40.2241	87.1913	91.2524	88.906	27.7878	19.5695	XR_108572.1	5	-	38400552	38403573	3021	2	EGFLAM-AS2	Intronic	RefSeq
p76	0.0170897	4.37635e-06	0.623253	78.0669	88.7082	92.4087	7.46175	92.133	61.9424	ENST00000310916.3	1	-	15442448	15478960	36512	6	ENSG00000175147.7	Antisense	ENSEMBL
p14168	1.70725e-07	0.00026976	0.62407	63.9391	37.5578	43.1779	3.49332	25.4817	61.3123	ENST00000437947.1	6	-	39865115	39867847	2732	3	ENSG00000240126.1	Antisense	ENSEMBL
p24890	6.02716e-08	0.00252376	0.624541	279.818	381.095	479.187	170.512	0.505282	541.023	NR_046316.1	11	+	779453	780755	1302	1	NS3BP	Intergenic	RefSeq
p3412	0.522113	1.22239e-05	0.624599	4859.16	4042.6	4484.36	478.516	3271.43	4611.02	ENST00000429892.1	12	-	122233172	122241390	8218	7	ENSG00000212694.4	Intergenic	ENSEMBL
p16160	3.45661e-09	0.00194482	0.625143	111.997	145.124	198.379	61.4827	71.3352	151.935	ENST00000521612.1	8	+	52812293	52824289	11996	2	ENSG00000228801.5	Divergent	ENSEMBL
p9973	1.45864e-06	5.37322e-06	0.62518	87.2734	89.9759	65.8523	43.7448	20.5079	87.7295	ENST00000439955.1	2	+	118593925	118595780	1855	3	ENSG00000236255.1	Intergenic	ENSEMBL
p7838	9.22999e-07	1.11537e-07	0.625813	198.358	288.184	155.124	132.088	42.1918	227.284	ENST00000580007.1	18	+	706522	707648	1126	2	ENSG00000265490.1	Antisense	ENSEMBL
p21736	1.97309e-07	4.78631e-14	0.625936	102.642	41.2099	144.327	5.29922	47.982	127.101	TCONS_00029901	22	-	36517579	36525898	8319	2	XLOC_014361	Intergenic	HumanLincRNACatalog
p15960	1.22853e-05	0.00016548	0.626153	59.6609	87.2213	74.5828	19.9357	87.9707	30.7646	ENST00000518973.1	8	-	138821686	139095813	274127	3	ENSG00000253288.1	Intergenic	ENSEMBL
p8514	1.01917e-09	0.00055833	0.626447	4462.34	2792.46	3915.21	272.961	4116.16	2608.3	ENST00000592758.1	19	+	3052907	3053722	815	2	ENSG00000267469.1	Antisense	ENSEMBL
p25567	0.0316725	1.01871e-06	0.626572	84.5843	65.5365	85.1192	3.40504	88.4058	55.5838	XR_110095.1	9	-	139510760	139511298	538	1	LOC401561	Intergenic	RefSeq
p9395	9.62236e-11	0.00220153	0.627162	1300.56	852.141	886.609	56.0282	1146.12	703.995	ENST00000594941.1	2	-	169630864	169642907	12043	6	ENSG00000227617.3	Antisense	ENSEMBL
p6366	5.771e-08	1.06343e-06	0.627485	75.143	93.2569	31.5047	11.3541	39.7265	74.3566	ENST00000570073.1	16	+	31799522	31801961	2439	1	ENSG00000259810.1	Intergenic	ENSEMBL
p20007	5.23761e-10	9.94142e-07	0.627506	94.897	193.971	91.9106	14.7058	129.767	94.4681	TCONS_00024358	16	+	27280348	27296191	15843	3	XLOC_011680	Divergent	HumanLincRNACatalog
p12987	0.00259895	0.015667	0.627749	75.7393	26.4315	88.2399	46.3591	23.658	49.5129	ENST00000509548.2	4	+	171264239	171293462	29223	3	ENSG00000251061.2	Intergenic	ENSEMBL
p20618	0.00319856	2.51725e-06	0.627749	59.7533	62.0063	24.5818	37.8638	12.9811	41.0207	TCONS_00027726	19	-	32456552	32516685	60133	5	XLOC_013297	Intergenic	HumanLincRNACatalog
p17627	1.23508e-05	1.27136e-09	0.628103	76.2169	52.1849	28.928	32.9569	4.49217	61.3703	TCONS_00000841	1	+	13997964	14001403	3439	2	XLOC_000056	Intergenic	HumanLincRNACatalog
p11603	0.000513691	0.421106	0.628379	94.1815	79.0206	42.529	16.8268	21.2466	97.4875	ENST00000479626.1	3	-	169696323	169703503	7180	2	ENSG00000240373.1	Antisense	ENSEMBL
p3255	4.41607e-10	1.01576e-09	0.628462	81.1153	40.6484	97.7793	33.246	35.8228	68.9057	ENST00000502700.2	12	-	67480557	67489334	8777	4	ENSG00000257083.1	Intergenic	ENSEMBL
p26616	3.22576e-11	0.799601	0.629304	2845.86	4723.03	2884.3	302.183	954.646	5321.41	eHIT000000422	10	-	133972839	133974226	1387	8	HIX0209372	Intronic	H-InvDB
p11478	0.00245023	8.89153e-12	0.629453	74.3003	30.9371	98.0144	43.2199	30.2966	54.421	ENST00000462528.1	3	-	117401760	117407708	5948	2	ENSG00000241213.1	Intergenic	ENSEMBL
p14253	0.0060197	0.00164027	0.630224	60.6516	51.9207	90.4772	44.0082	59.3941	24.5644	ENST00000430931.1	6	-	79519431	79523020	3589	2	ENSG00000229495.1	Intergenic	ENSEMBL
p10432	0.684107	1.03801e-08	0.631111	3422.74	3447.98	2610.77	1361.08	587.687	4035.11	ENST00000425233.1	20	-	35153903	35201387	47484	4	ENSG00000232907.2	Antisense	ENSEMBL
p26008	3.072e-05	1.73185e-09	0.631279	61.542	40.1857	56.1191	38.4968	37.1693	23.9793	uc002ilk.1	17	-	45400563	45401497	934	1	AX748120	Antisense	UCSC
p27362	0.000612985	1.27267e-09	0.631358	4764.12	2616.59	2836.33	541.156	1686.77	4222.68	uc.50-	2	-	38976300	38976522	222	1	uc.50-	Intronic	UCR
p13618	1.21543e-06	2.68381e-09	0.631611	75.5309	88.5474	2.92754	78.9146	7.54426	19.0238	ENST00000505844.1	5	+	17436845	17441787	4942	2	ENSG00000248455.1	Intergenic	ENSEMBL
p11595	2.17551e-09	2.04334e-05	0.631721	44.0889	78.4587	38.9716	29.0188	10.5092	62.5071	ENST00000470523.2	3	-	167584287	167588765	4478	3	ENSG00000244706.2	Intergenic	ENSEMBL
p24640	2.77502e-05	1.57293e-08	0.632613	60.3718	61.2049	91.0534	63.0817	36.0303	35.4005	TCONS_00017362	X	-	109700007	109839249	139242	2	XLOC_008208	Divergent	HumanLincRNACatalog
p18503	0.592673	0.00446811	0.632797	1062.18	734.492	1422.92	703.904	180.168	1153.28	TCONS_00019414	11	+	82783192	82802307	19115	4	XLOC_009233	Divergent	HumanLincRNACatalog
p13772	3.43192e-07	6.23916e-08	0.633221	38.6337	80.2529	53.6289	19.7532	26.5317	62.9556	ENST00000508718.1	5	+	88185270	88239115	53845	4	ENSG00000248309.1	Antisense	ENSEMBL
p10764	2.60231e-10	6.09629e-09	0.633776	106.346	148.604	178.213	31.9961	125.008	117.524	ENST00000428410.1	21	-	44384748	44385473	725	2	ENSG00000224100.1	Intergenic	ENSEMBL
p562	0.127557	4.06944e-05	0.635168	74.3724	84.4512	59.7211	9.58542	75.0691	54.1582	ENST00000442108.1	1	-	179798743	179805259	6516	2	ENSG00000231966.1	Intergenic	ENSEMBL
p23943	4.646e-06	0.000806244	0.635896	88.4833	50.7805	79.3877	8.45166	32.6706	97.9172	TCONS_00014971	8	-	37184474	37189507	5033	3	XLOC_007052	Intergenic	HumanLincRNACatalog
p29063	9.10929e-05	1.40102e-06	0.63608	65.6408	37.5397	56.693	41.1069	23.512	37.0735	ENST00000540814.1	12	-	127137495	127174852	37357	2	ENSG00000256732.1	Intergenic	ENSEMBL
p16324	0.0852888	2.07613e-06	0.636308	84.6947	84.8092	91.2011	96.6343	22.0707	47.1836	ENST00000577661.1	8	+	107282463	107284434	1971	2	ENSG00000254615.2	Antisense	ENSEMBL
p5097	2.3759e-14	1.13907e-08	0.636635	47.2294	42.4196	75.4368	56.9213	7.8226	40.3555	ENST00000561259.1	15	-	37173218	37179236	6018	2	ENSG00000259280.1	Intergenic	ENSEMBL
p20410	2.17806e-07	2.35401e-12	0.636833	89.2587	46.3436	75.8921	16.6276	23.6675	94.3916	TCONS_00026495	18	-	36171688	36172773	1085	2	XLOC_012821	Intergenic	HumanLincRNACatalog
p15663	0.000203723	0.0148607	0.636873	80.5485	76.4124	45.5432	71.0309	5.56811	52.3705	ENST00000517714.1	8	-	37458054	37483391	25337	5	ENSG00000254306.1	Intergenic	ENSEMBL
p26350	7.50331e-06	0.00316766	0.637265	224.071	168.265	246.595	144.897	1.31822	260.954	uc003qxf.3	6	-	170149607	170151679	2072	1	AK023627	Antisense	UCSC
p14774	1.12178e-05	0.0211752	0.637856	81.2319	78.488	35.1096	42.8017	26.8606	54.611	ENST00000421161.1	6	+	159528822	159537085	8263	4	ENSG00000224478.1	Intergenic	ENSEMBL
p11290	0.0282525	1.15885e-06	0.63805	111.56	174.01	105.862	99.5186	55.5824	94.6519	ENST00000602768.1	3	-	9854445	9854781	336	1	ENSG00000269886.1	Antisense	ENSEMBL
p7718	0.376342	0.063457	0.638338	74.7237	60.052	65.3753	62.0759	15.0723	50.616	ENST00000595135.1	18	-	39062439	39212149	149710	5	ENSG00000267313.2	Intergenic	ENSEMBL
p2678	0.000272078	8.58753e-06	0.63863	75.4508	83.559	35.2773	49.7478	12.3949	61.9348	ENST00000531858.1	11	+	22513657	22524392	10735	2	ENSG00000255357.1	Intergenic	ENSEMBL
p16771	1.71981e-07	0.00632727	0.638762	73.4546	29.8878	98.7383	14.1279	13.3238	101.63	ENST00000425493.1	9	+	44384584	44391705	7121	3	ENSG00000229311.1	Intergenic	ENSEMBL
p24388	0.000729943	0.0788558	0.639269	84.1922	53.0522	45.6928	64.6034	2.07605	50.2666	TCONS_00016503	9	-	138469276	138472027	2751	2	XLOC_007892	Intergenic	HumanLincRNACatalog
p8342	0.000182284	3.92855e-08	0.639677	22416.5	34599.6	40018.4	36067.8	545.639	25457.2	ENST00000590304.1	19	-	38852434	38853124	690	2	ENSG00000266963.1	Antisense	ENSEMBL
p23142	7.08073e-05	0.153365	0.639739	93.0567	112.043	55.1185	19.2903	65.9523	81.2291	TCONS_00012036	6	-	1068829	1101598	32769	2	XLOC_005571	Intergenic	HumanLincRNACatalog
p8430	0.00953974	2.79667e-08	0.641111	100.385	113.949	185.474	8.12616	161.534	86.6616	ENST00000593857.1	19	-	52725477	52734540	9063	3	ENSG00000268015.1	Antisense	ENSEMBL
p16849	0.011045	1.32332e-08	0.64114	59.4985	57.0576	72.4519	29.5658	65.3742	26.2407	ENST00000563268.1	9	+	93759335	93764153	4818	3	ENSG00000260454.1	Intergenic	ENSEMBL
p27480	0.0378862	0.00191238	0.641593	222.214	276.312	218.145	219.002	67.3761	173.433	uc.108+	2	+	176940356	176940730	374	1	uc.108+	Intergenic	UCR
p10893	4.33192e-05	1.14079e-09	0.642125	285.389	397.437	264.606	63.9048	132.051	412.413	ENST00000419826.2	21	+	41099772	41101611	1839	2	ENSG00000231713.2	Intergenic	ENSEMBL
p25199	0.672431	6.28755e-10	0.642396	87.2965	35.8125	92.0998	91.6974	2.81821	43.7337	NR_033800.1	21	-	40685860	40686888	1028	1	BRWD1-IT2	Divergent	RefSeq
p13636	1.12626e-06	7.6653e-10	0.642868	168.235	186.231	169.928	31.6377	87.4215	218.057	ENST00000602740.1	5	+	29164531	29167904	3373	3	ENSG00000259786.2	Intergenic	ENSEMBL
p5727	0.00342711	5.31947e-10	0.642877	84.9686	70.4714	69.175	60.6281	34.0341	49.7376	ENST00000556200.1	15	+	91509574	91516336	6762	2	ENSG00000258725.1	Antisense	ENSEMBL
p1571	3.40192e-06	0.00443378	0.643106	135.676	111.15	104.735	16.7875	44.9856	164.318	ENST00000602156.1	10	-	45511527	45631088	119561	4	ENSG00000242848.2	Intergenic	ENSEMBL
p1580	2.91711e-10	1.90653e-08	0.643234	96.8564	157.238	175.661	73.2461	88.1099	115.077	ENST00000593793.1	10	-	46937607	46947552	9945	2	ENSG00000229227.3	Intergenic	ENSEMBL
p19008	8.66754e-06	1.11937e-08	0.643399	60.9208	96.4632	90.9148	91.0537	15.7047	52.9968	TCONS_00021964	13	-	31626332	31627707	1375	2	XLOC_010561	Intergenic	HumanLincRNACatalog
p11569	0.00277009	0.093203	0.643672	103.94	60.8826	89.9563	22.8014	53.2415	87.9512	ENST00000473352.1	3	-	156470851	156534851	64000	2	ENSG00000240875.1	Intergenic	ENSEMBL
p1127	4.57769e-06	1.04798e-05	0.644204	106.31	120.641	68.7235	41.1089	7.16721	142.198	ENST00000448199.1	1	+	114366034	114371793	5759	2	ENSG00000231128.1	Antisense	ENSEMBL
p27896	0.266533	8.82696e-12	0.644301	81.1149	28.3243	82.1586	80.8716	0.0727756	42.5022	hox-HOXB3-70	17	+	43982245	43983933	1688	1	hox-HOXB3-70	Intronic	HOX Loci
p8289	0.00372788	1.82832e-08	0.644429	61.2821	52.5162	96.6978	70.5391	36.8348	28.2759	ENST00000593082.1	19	-	32491510	32516683	25173	4	ENSG00000267489.1	Intergenic	ENSEMBL
p11777	4.24783e-06	0.0574121	0.644502	98.3047	139.977	143.15	25.3829	120.474	99.976	ENST00000455974.1	3	+	34244735	34310303	65568	2	ENSG00000236452.1	Intergenic	ENSEMBL
p14083	1.42487e-07	0.0228423	0.646049	89.4398	57.7745	80.6539	44.8679	23.8805	78.4656	ENST00000427591.1	6	-	4186857	4188343	1486	2	ENSG00000237716.1	Intergenic	ENSEMBL
p7118	9.63713e-11	5.57071e-07	0.646384	766.785	469.74	494.943	446.793	411.133	261.267	ENST00000425081.2	17	+	1420224	1421390	1166	2	ENSG00000236618.2	Antisense	ENSEMBL
p26376	0.560074	1.55479e-10	0.646661	228.259	292.106	215.053	3.51917	276.511	195.536	uc003qic.1	6	+	139013606	139017892	4286	2	FLJ46906	Intergenic	UCSC
p33624	9.64807e-11	8.12356e-09	0.64714	6142.14	1822.27	3635	4419.76	616.89	2469.79	TCONS_00026176	18	+	109064	122217	13153	5	XLOC_012599	Intergenic	HumanLincRNACatalog
p8268	0.000123274	8.64408e-11	0.647142	392.84	135.327	440.167	15.693	114.085	496.87	ENST00000593065.1	19	-	28927966	29026184	98218	4	ENSG00000267243.1	Intergenic	ENSEMBL
p8693	0.000135503	6.77754e-14	0.647258	63.6855	75.3509	85.0308	93.9324	10.5382	40.5586	ENST00000601692.1	19	+	35527237	35527964	727	2	ENSG00000267874.1	Intronic	ENSEMBL
p25701	1.08674e-10	0.201885	0.649265	4320.95	2855.66	4692.85	1970.55	2884.23	2851.64	uc001esl.4	1	+	149576452	149616786	40334	3	LOC728855	Intergenic	UCSC
p11463	5.41261e-08	0.0192948	0.649897	40.9001	87.7585	50.7797	51.9064	17.1621	47.5479	ENST00000474711.1	3	-	110246328	110248429	2101	4	ENSG00000240895.1	Intergenic	ENSEMBL
p949	5.20149e-08	0.018032	0.65043	2796.29	4204.03	568.147	2146	430.081	2346.68	ENST00000588291.1	1	+	52259636	52264099	4463	2	ENSG00000266993.1	Antisense	ENSEMBL
p21148	4.44887e-07	4.1888e-14	0.651418	51.3225	63.8972	11.9066	60.3768	1.05374	21.3818	TCONS_00004811	2	+	67793632	67801094	7462	4	XLOC_001515	Intergenic	HumanLincRNACatalog
p10134	2.37961e-09	0.0656025	0.651546	127.758	194.447	175.225	45.2017	25.722	253.175	ENST00000592600.1	2	+	179388018	179449716	61698	2	ENSG00000237298.2	Antisense	ENSEMBL
p1046	0.0110153	1.45049e-12	0.651637	136.723	162.891	92.5877	104.305	0.953976	150.314	ENST00000419658.1	1	+	83373244	83463244	90000	4	ENSG00000230817.1	Intergenic	ENSEMBL
p12577	0.000222348	0.0137033	0.651769	632.372	509.147	909.329	335.234	182.418	819.028	ENST00000513304.1	4	+	124403	127532	3129	2	ENSG00000250312.2	Intronic	ENSEMBL
p15257	1.72464e-05	1.88322e-08	0.652933	46.7842	33.6282	48.9359	0.867363	63.8643	19.7241	ENST00000590912.1	7	+	20135759	20170098	34339	5	ENSG00000267055.1	Intergenic	ENSEMBL
p29394	0.815265	1.10906e-09	0.652962	168.825	121.523	190.55	102.4	34.1361	177.472	ENST00000501133.2	4	+	103749211	103765232	16021	2	ENSG00000246560.2	Intronic	ENSEMBL
p5231	0.00143504	0.00572213	0.653782	92.5356	139.176	180.267	128.75	74.9388	65.6559	ENST00000558702.1	15	-	69750860	69754145	3285	2	ENSG00000259215.1	Intergenic	ENSEMBL
p10882	9.29391e-06	5.3108e-10	0.654314	76.8723	21.9899	85.1621	34.2197	34.6932	51.4969	ENST00000581640.1	21	+	38580803	38592989	12186	5	ENSG00000230366.5	Intergenic	ENSEMBL
p12967	0.107063	6.39526e-08	0.654504	88.6541	5.05372	52.2493	11.6516	22.0228	61.8551	ENST00000503611.1	4	+	159091903	159124029	32126	6	ENSG00000248429.1	Antisense	ENSEMBL
p27211	1.86038e-05	6.81761e-06	0.654524	137.382	103.416	102.72	108.484	41.1534	75.2033	uc.366+	14	+	31382706	31382908	202	1	uc.366+	Antisense	UCR
p21448	3.92536e-08	4.43794e-15	0.656568	1011.38	731.247	1102.87	232.844	228.989	1406.43	TCONS_00028695	20	-	47656923	47659915	2992	2	XLOC_013781	Intergenic	HumanLincRNACatalog
p10151	3.44551e-05	0.00594878	0.656993	168.736	99.0062	188.528	59.1544	6.13454	234.478	ENST00000590932.1	2	+	179406473	179462408	55935	2	ENSG00000237298.2	Antisense	ENSEMBL
p17116	4.77811e-10	9.25611e-08	0.657107	402.996	663.679	309.806	216.013	26.5299	661.952	ENST00000434284.1	X	-	153001079	153031908	30829	3	ENSG00000232725.1	Antisense	ENSEMBL
p15243	1.23267e-05	0.000858873	0.657558	58.423	94.9423	22.325	51.8633	27.1005	36.5627	ENST00000412014.1	7	+	14853755	14856190	2435	3	ENSG00000226323.1	Intronic	ENSEMBL
p33491	9.62751e-11	5.19509e-10	0.6576	17115.2	88954.7	71302.5	34005.4	73425.5	9209.3	ENST00000489336.1	19	+	12098485	12114626	16141	3	ENSG00000219665.4	Intergenic	ENSEMBL
p13474	6.79521e-05	0.002076	0.657743	64.1305	87.612	40.6292	52.1289	35.3622	39.04	ENST00000522076.1	5	-	157109992	157117274	7282	2	ENSG00000253798.1	Intergenic	ENSEMBL
p11566	0.877603	1.42633e-09	0.657772	104.541	151.759	114.2	104.492	77.682	61.531	ENST00000463449.1	3	-	156389710	156390659	949	2	ENSG00000243926.1	Intergenic	ENSEMBL
p1906	0.000795665	0.612382	0.658698	124.254	158.85	73.8007	74.6924	83.072	77.3284	ENST00000412085.1	10	+	32635426	32636107	681	2	ENSG00000233825.1	Intronic	ENSEMBL
p14803	1.88606e-05	0.0140427	0.658947	59.1193	68.4761	62.567	55.3453	53.2081	16.7535	ENST00000420557.2	6	+	170190416	170202969	12553	3	ENSG00000231690.2	Intergenic	ENSEMBL
p20052	0.0776756	1.21353e-11	0.659063	115.732	199.102	151.656	142.166	90.6243	74.6564	TCONS_00024424	16	+	58456605	58477085	20480	3	XLOC_011740	Intergenic	HumanLincRNACatalog
p4394	5.5663e-14	4.815e-09	0.65962	1389.08	4.18414	543.154	197.423	294.175	785.701	ENST00000399886.2	14	-	24409571	24422578	13007	2	ENSG00000215256.3	Divergent	ENSEMBL
p23353	6.88646e-09	0.000291756	0.660507	107.442	120.953	193.513	0.215612	151.767	126.69	TCONS_00011645	6	+	2398805	2413773	14968	3	XLOC_005127	Intergenic	HumanLincRNACatalog
p20546	4.14063e-09	1.89336e-11	0.660788	408.677	582.404	640.343	91.8865	340.452	645.687	TCONS_00026628	18	+	54705810	54711425	5615	3	XLOC_012688	Intergenic	HumanLincRNACatalog
p29380	0.733983	0.000315233	0.660851	81.6007	65.542	85.5974	36.6319	83.5258	33.6489	ENST00000508714.1	4	-	136788144	136834835	46691	3	ENSG00000248330.1	Intergenic	ENSEMBL
p27852	2.74012e-08	2.32566e-14	0.661617	100.609	175.305	148.583	125.196	42.6142	113.044	uc.468+	X	+	25017562	25018051	489	1	uc.468+	Intergenic	UCR
p2507	4.9631e-06	4.31315e-06	0.661992	38.5142	91.9017	81.9044	24.9023	97.5632	18.0889	ENST00000499809.1	11	-	115624965	115630912	5947	3	ENSG00000246100.3	Intergenic	ENSEMBL
p33587	9.62398e-11	0.917571	0.662095	1241.06	1480.9	64.7428	1096.64	229.53	518.896	ENST00000522735.1	8	+	30589763	30620863	31100	8	ENSG00000104691.10	Antisense	ENSEMBL
p11649	4.005e-07	2.94797e-14	0.662569	165.263	66.1645	133.008	26.7965	25.736	188.931	ENST00000354642.2	3	-	186452558	186463919	11361	5	ENSG00000197099.3	Antisense	ENSEMBL
p6614	2.69954e-06	1.64148e-14	0.663196	197.944	287.163	214.828	126.881	117.65	219.663	ENST00000576171.1	17	-	33614	41378	7764	3	ENSG00000262836.1	Intergenic	ENSEMBL
p8499	5.81996e-07	8.54572e-13	0.663295	225.908	172.758	222.109	82.3865	48.9187	280.451	ENST00000593201.1	19	+	1822087	1824542	2455	3	ENSG00000267244.1	Antisense	ENSEMBL
p22805	1.43039e-05	6.56604e-08	0.663302	2688.83	1848.68	4873.95	1240.93	1394.29	3607.41	TCONS_00010466	5	-	126554725	126565501	10776	3	XLOC_004988	Intergenic	HumanLincRNACatalog
p28928	0.408796	0.00387797	0.663403	2700.75	3604.64	2289.65	1002.18	1703.34	2996.46	ENST00000432521.2	1	-	2481721	2485589	3868	2	ENSG00000238164.2	Intergenic	ENSEMBL
p16754	0.00070854	0.167673	0.663459	2960.79	4815.16	4309.33	4495.98	646.304	2875.8	ENST00000429493.1	9	+	37079892	37090398	10506	2	ENSG00000233137.2	Intergenic	ENSEMBL
p24013	0.334982	0.00241623	0.663559	63.6798	74.7401	55.6541	22.8502	76.0117	29.9176	TCONS_00015115	8	-	102137265	102138373	1108	2	XLOC_007171	Intergenic	HumanLincRNACatalog
p2276	3.08597e-09	0.0563043	0.663569	59.2773	48.5458	68.0735	5.86508	46.2403	64.6142	ENST00000527450.1	11	-	45237365	45256843	19478	2	ENSG00000254664.1	Antisense	ENSEMBL
p809	0.00191861	5.23079e-14	0.664527	1167.27	229.98	890.616	304.734	112.722	1102.89	ENST00000454104.1	1	+	9908375	9910212	1837	3	ENSG00000223989.1	Antisense	ENSEMBL
p28646	0.0372879	3.23563e-11	0.665539	206.536	151.495	162.683	68.7027	87.4074	190.445	ASO1978	None	None	None	None	#VALUE!	None	ASO1978	Antisense	RNAdb
p3561	0.00010914	0.0152311	0.665778	86.1355	99.4998	18.6164	44.6509	32.5854	58.7501	ENST00000541162.1	12	+	11709899	11743303	33404	3	ENSG00000247157.2	Intergenic	ENSEMBL
p8565	2.26858e-06	4.50281e-12	0.66625	3082.13	959.033	1398.89	623.082	354.422	2646.93	ENST00000451691.2	19	+	12305902	12318269	12367	3	ENSG00000234773.2	Intergenic	ENSEMBL
p13426	0.434149	2.41653e-06	0.666279	104.744	135.412	190.946	129.356	102.706	55.1725	ENST00000523452.1	5	-	139452441	139488215	35774	3	ENSG00000245146.2	Intergenic	ENSEMBL
p21728	0.00277409	1.48698e-07	0.666357	65.2558	81.1749	63.1652	27.5797	53.0879	58.998	TCONS_00029665	22	-	25959208	25960634	1426	2	XLOC_014323	Divergent	HumanLincRNACatalog
p21055	9.67763e-11	4.11221e-14	0.667008	202.38	275.187	235.498	104.381	51.251	319.988	TCONS_00003586	2	+	15922617	15926006	3389	3	XLOC_001363	Intergenic	HumanLincRNACatalog
p10611	2.93056e-07	2.46955e-08	0.667086	63.5937	89.5352	74.4562	56.1288	46.4966	49.1933	ENST00000421642.1	20	+	51288455	51307147	18692	5	ENSG00000232294.1	Intergenic	ENSEMBL
p16945	3.00213e-09	0.00228274	0.667216	76.3043	89.1069	64.475	45.6976	16.3006	91.3857	ENST00000415344.1	9	+	132891869	132895515	3646	2	ENSG00000228932.1	Intronic	ENSEMBL
p17206	1.40174e-05	8.83239e-17	0.667789	710.633	969.873	967.932	529.019	639.805	599.774	ENST00000415215.1	X	+	73164201	73167265	3064	4	ENSG00000225470.2	Intergenic	ENSEMBL
p8202	0.0295347	4.78284e-10	0.668027	1112.65	576.435	1096.98	407.947	218.527	1234.69	ENST00000596816.1	19	-	16750777	16751479	702	2	ENSG00000267904.1	Intergenic	ENSEMBL
p4999	6.6182e-07	6.36164e-10	0.668143	198.263	266.725	256.405	69.0278	177.346	235.62	ENST00000520069.2	14	+	101302142	101327096	24954	5	ENSG00000214548.8	Intergenic	ENSEMBL
p30240	1.69091e-08	0.000109934	0.668694	333.28	471.326	45.0879	174.647	135.82	257.719	uc010lcl.3	7	-	74800784	74805053	4269	1	DQ571357	Intergenic	UCSC
p27373	4.38002e-08	8.29638e-05	0.668908	99.0342	173.768	10.975	6.71898	83.7841	99.3175	uc.62-	2	-	60780681	60780915	234	1	uc.62-	Divergent	UCR
p9772	1.13367e-10	1.96721e-09	0.669172	11976.6	1766.84	3669.91	1051.63	3244.15	7356.78	ENST00000431359.1	2	+	41370919	41383954	13035	3	ENSG00000241522.1	Intergenic	ENSEMBL
p25913	1.34665e-07	1.65737e-05	0.669444	107.067	173.256	116.727	33.8555	33.0978	198.849	uc021rvu.1	14	+	72207057	72207946	889	1	DKFZp686G1344	Antisense	UCSC
p11312	4.17938e-08	0.116835	0.669624	671.491	288.625	85.7781	177.603	14.0241	508.729	ENST00000594820.1	3	-	15480705	15485576	4871	3	ENSG00000249786.2	Antisense	ENSEMBL
p33860	4.0459e-09	0.000139842	0.670464	6779.44	4088.62	3349.72	2593.3	1300.51	5638.7	HIT000257890	14	-	95599756	95624347	24591	4	HIX0011933	Antisense	H-InvDB
p22035	0.00288768	1.35291e-08	0.670995	75.2409	31.6849	89.4379	84.1803	1.73667	45.842	TCONS_00005990	3	+	39221226	39223012	1786	2	XLOC_002616	Intergenic	HumanLincRNACatalog
p28385	0.0166634	3.69906e-15	0.671029	134815	120816	26953.1	2545.73	46844.5	140231	ASO3614	None	None	None	None	#VALUE!	None	ASO3614	Intronic	RNAdb
p29621	4.91384e-08	4.36234e-08	0.671239	75.2048	98.5814	63.2341	70.1335	20.3801	68.5836	TCONS_00019969	11	+	91527511	91534050	6539	4	XLOC_009248	Intergenic	HumanLincRNACatalog
p19242	0.00816163	2.07821e-12	0.671383	87.2973	92.5113	1.25406	29.2738	34.8624	57.4263	TCONS_00021501	13	+	91145541	91187593	42052	6	XLOC_010469	Intergenic	HumanLincRNACatalog
p25878	0.00128138	0.61599	0.671435	111.833	85.4412	149.123	101.303	2.46758	128.813	uc001vks.3	13	+	78493823	79158297	664474	3	BX647243	Antisense	UCSC
p28933	0.361876	4.77143e-06	0.671533	1096.03	1423.02	999.533	1411.39	20.8083	930.641	ENST00000461448.1	1	-	28905049	28908354	3305	4	ENSG00000197989.8	Antisense	ENSEMBL
p22138	4.0514e-09	0.00856404	0.672056	79.6153	89.8806	83.5029	64.5508	35.1603	70.3182	TCONS_00006187	3	+	122998229	122998762	533	2	XLOC_002788	Intergenic	HumanLincRNACatalog
p4076	0.000284222	2.10928e-07	0.672223	138.64	164.636	158.562	104.177	55.2709	151.011	ENST00000457528.1	13	-	78173889	78180686	6797	3	ENSG00000224347.1	Antisense	ENSEMBL
p15654	2.96123e-10	7.69553e-08	0.672279	49.7227	14.0498	43.9058	22.5899	17.5483	32.2518	ENST00000523411.1	8	-	36924958	36926936	1978	2	ENSG00000254038.1	Intergenic	ENSEMBL
p18145	1.11704e-10	0.0588823	0.672284	66.6211	35.1397	67.9123	1.45006	17.1165	95.5019	TCONS_00018200	10	+	49649949	49652001	2052	2	XLOC_008482	Intergenic	HumanLincRNACatalog
p3535	0.465534	9.8844e-06	0.672307	111.482	194.764	139.953	103.406	131.548	65.0283	ENST00000398526.2	12	+	8328452	8341133	12681	3	ENSG00000256703.1	Antisense	ENSEMBL
p8132	2.09741e-08	3.392e-13	0.672372	6805.89	4942.24	4612.06	3009.46	2853.28	5137.38	ENST00000587701.1	19	-	3118662	3119302	640	2	ENSG00000267139.1	Antisense	ENSEMBL
p28017	1.18485e-07	2.69245e-08	0.672914	118.511	183.131	180.3	175.493	16.7317	132.081	nc-HOXB9-201	17	+	44150817	44151056	239	1	nc-HOXB9-201	Intronic	HOX Loci
p6669	9.95684e-11	4.77262e-12	0.673501	1441.01	998.771	522.753	119.546	897.039	978.682	ENST00000315707.3	17	-	8123959	8127361	3402	3	ENSG00000178977.3	Divergent	ENSEMBL
p23987	0.114132	0.000422966	0.673595	117.04	199.666	55.1784	142.713	48.106	59.6811	TCONS_00015031	8	-	67122576	67123886	1310	2	XLOC_007110	Intergenic	HumanLincRNACatalog
p11623	0.000186202	2.16583e-08	0.673828	93.8964	144.138	150.916	167.356	1.72275	93.0073	ENST00000437488.1	3	-	178244292	178578140	333848	8	ENSG00000237978.1	Antisense	ENSEMBL
p14333	7.36594e-08	0.0320752	0.674459	74.2622	23.4965	49.3402	14.2606	26.5729	58.3788	ENST00000411615.1	6	-	138051306	138060120	8814	3	ENSG00000234956.1	Intergenic	ENSEMBL
p2864	0.0454364	2.82269e-10	0.674731	224.348	233.736	268.394	59.2899	221.172	209.715	ENST00000528468.1	11	+	77878226	77884940	6714	2	ENSG00000246174.3	Antisense	ENSEMBL
p18824	4.37159e-06	1.97213e-12	0.674898	82.5415	95.7441	68.4496	21.1664	54.9345	90.4201	TCONS_00021101	12	+	40925796	40931517	5721	14	XLOC_009713	Antisense	HumanLincRNACatalog
p9910	1.32843e-05	3.30738e-09	0.67533	169.979	194.202	174.153	51.217	143.777	168.559	ENST00000413274.1	2	+	98963457	98967603	4146	2	ENSG00000227987.1	Intronic	ENSEMBL
p3047	2.97343e-10	9.8643e-05	0.675659	95.9248	153.72	139.336	141.035	21.0829	100.7	ENST00000505276.2	12	-	3405367	3409390	4023	2	ENSG00000250770.2	Intergenic	ENSEMBL
p14293	4.05737e-05	4.47599e-08	0.675686	67.0981	75.851	47.0774	18.6378	58.553	51.2075	ENST00000421737.1	6	-	113749741	113754623	4882	2	ENSG00000232316.1	Intergenic	ENSEMBL
p27803	7.11303e-07	0.410595	0.675785	1240.83	1124.35	1236.69	218.857	81.2777	2133.95	uc.264+	9	+	86590491	86590758	267	1	uc.264+	Intronic	UCR
p10993	6.32698e-05	3.74842e-12	0.675905	66.8908	87.1233	22.8027	24.4355	46.2779	48.798	ENST00000461286.2	22	-	29832817	29874115	41298	3	ENSG00000225465.5	Antisense	ENSEMBL
p19370	0.767628	0.00118546	0.676294	204.997	212.697	30.3136	76.8838	78.3556	147.745	TCONS_00022861	14	-	98392880	98435889	43009	2	XLOC_011117	Intergenic	HumanLincRNACatalog
p7375	0.000198054	0.0374391	0.676615	2514.68	56.7428	1775.02	935	120.729	1885.14	ENST00000586560.1	17	+	42276249	42293933	17684	2	ENSG00000267394.1	Antisense	ENSEMBL
p7102	0.000172327	5.7728e-11	0.676698	344.484	144.615	159.409	22.5726	145.262	271.01	ENST00000576912.1	17	-	80560864	80562054	1190	1	ENSG00000261845.2	Antisense	ENSEMBL
p10263	0.000347458	8.01082e-09	0.676904	202.652	273.522	151.989	54.7102	138.076	232.42	ENST00000417355.1	2	+	220163723	220168852	5129	3	ENSG00000230432.1	Antisense	ENSEMBL
p27960	1.07594e-08	2.39797e-08	0.677043	3950.13	4035.61	3049.15	99.7874	1413.79	5957.52	nc-HOXA4-65	7	+	26952486	26952665	179	1	nc-HOXA4-65	Intergenic	HOX Loci
p16262	0.000272808	4.30845e-05	0.677272	66.4177	82.2646	77.8	74.7681	51.0039	27.6182	ENST00000520459.1	8	+	86436127	86452740	16613	3	ENSG00000254380.1	Intergenic	ENSEMBL
p24872	0.0626829	1.5116e-07	0.677558	200.485	253.133	101.247	171.486	51.5061	152.961	NR_036539.1	11	-	9481102	9482245	1143	1	LOC644656	Divergent	RefSeq
p14922	0.870354	0.0627714	0.677688	113.726	173.693	28.2015	33.1378	111.548	69.2056	ENST00000433315.1	7	-	42869270	42884037	14767	2	ENSG00000231539.1	Intergenic	ENSEMBL
p2337	3.49918e-10	0.00294294	0.677805	1175.64	699.85	1225.4	827.637	657.411	616.754	ENST00000537024.1	11	-	62621018	62622951	1933	6	ENSG00000255717.1	Divergent	ENSEMBL
p3026	0.00050875	0.663058	0.678236	104.322	54.1104	148.477	15.3611	106.399	86.3975	ENST00000540136.1	12	-	273829	275487	1658	2	ENSG00000256694.1	Antisense	ENSEMBL
p28099	3.52373e-07	1.39805e-08	0.678349	63.4404	8.4352	93.0155	46.1059	25.2509	40.497	nc-HOXD4-30	2	+	176835385	176835494	109	1	nc-HOXD4-30	Antisense	HOX Loci
p4451	7.59822e-07	1.07836e-13	0.678834	73.9996	74.3483	52.1476	82.1942	12.8446	41.0643	ENST00000557067.1	14	-	42057063	42074059	16996	2	ENSG00000258636.1	Intergenic	ENSEMBL
p3338	4.40149e-06	0.110669	0.679013	4244.1	4738.58	4911.28	2896.49	3085.05	3452.64	ENST00000551844.1	12	-	96616574	96617751	1177	2	ENSG00000258177.1	Antisense	ENSEMBL
p23244	9.87212e-08	0.62117	0.679054	77.7346	50.3976	63.9471	46.8676	7.37784	76.1869	TCONS_00012225	6	-	93299039	93299804	765	2	XLOC_005783	Intergenic	HumanLincRNACatalog
p33586	0.000260505	0.0761789	0.680516	75.6316	45.0291	75.739	8.96094	86.6044	38.0878	ENST00000534538.1	8	-	145741628	145743012	1384	4	ENSG00000160957.7	Antisense	ENSEMBL
p13637	3.44991e-06	4.69545e-10	0.680533	57.703	77.5836	87.2303	87.5203	15.9513	47.9585	ENST00000509750.1	5	+	31657324	31665174	7850	3	ENSG00000248624.1	Intergenic	ENSEMBL
p20666	0.000938077	0.000135703	0.680566	66.6588	83.2417	34.9258	6.01521	78.0099	41.7613	TCONS_00026777	19	+	16133437	16138723	5286	5	XLOC_012983	Intergenic	HumanLincRNACatalog
p14163	0.250199	0.0358953	0.681101	209.385	258.143	65.6536	38.8335	41.8372	282.48	ENST00000526611.1	6	-	36114474	36164980	50506	4	ENSG00000246982.2	Antisense	ENSEMBL
p11404	0.00127792	0.0764725	0.68112	169.157	184.092	155.853	73.3373	66.598	206.824	ENST00000485805.1	3	-	64064036	64073039	9003	4	ENSG00000189196.4	Intergenic	ENSEMBL
p20179	0.00106616	5.77535e-06	0.681312	79.0732	19.7557	89.4527	77.677	10.0444	40.5571	TCONS_00025688	17	-	46124320	46125435	1115	3	XLOC_012503	Divergent	HumanLincRNACatalog
p6551	0.664674	8.91929e-13	0.681905	105.266	163.939	118.37	91.7953	140.754	31.7397	ENST00000565382.1	16	+	84150655	84151176	521	1	ENSG00000260018.1	Divergent	ENSEMBL
p13708	1.73253e-06	0.987739	0.681926	73.6016	98.2233	2.7523	18.2993	51.6868	49.0627	ENST00000513197.1	5	+	68259072	68263672	4600	2	ENSG00000250066.1	Intergenic	ENSEMBL
p3558	8.35752e-06	1.61808e-07	0.683038	47.5641	75.6484	44.4983	52.1288	14.344	48.0801	ENST00000539328.1	12	+	11365125	11404303	39178	2	ENSG00000256373.1	Intergenic	ENSEMBL
p20572	1.97202e-08	1.15076e-09	0.683164	307.372	328.186	46.77	26.7045	7.87958	431.558	TCONS_00026374	18	+	73959767	73971999	12232	6	XLOC_012725	Intergenic	HumanLincRNACatalog
p8893	1.90901e-08	4.46281e-05	0.683378	96.5315	100.716	120.473	54.8993	57.6072	104.616	ENST00000600726.1	19	+	59070552	59082396	11844	4	ENSG00000267858.1	Antisense	ENSEMBL
p7390	1.15403e-06	2.18469e-11	0.683888	136.925	186.127	60.6678	11.9208	53.1953	197.306	ENST00000591950.1	17	+	43623242	43631736	8494	2	ENSG00000267198.1	Intergenic	ENSEMBL
p26589	2.80018e-08	0.309565	0.683896	80.3131	94.4527	94.6118	58.7428	51.8163	73.6673	HIT000395572	1	-	200443216	200443559	343	1	HIX0093898	Intergenic	H-InvDB
p19605	8.90909e-05	1.61233e-09	0.684725	103.202	137.631	153.307	147.363	30.2295	92.285	TCONS_00023721	15	-	69752806	69755112	2306	2	XLOC_011518	Intergenic	HumanLincRNACatalog
p15019	0.000100808	8.74583e-13	0.685193	81.0256	53.8273	70.1659	13.2401	81.151	46.0863	ENST00000513631.1	7	-	96635694	96637022	1328	1	ENSG00000248849.1	Antisense	ENSEMBL
p14934	0.0207067	0.000118732	0.685325	302.466	301.603	461.652	127.787	387.138	215.441	ENST00000584686.1	7	-	45023445	45026267	2822	4	ENSG00000232956.3	Intergenic	ENSEMBL
p4442	0.015499	0.291287	0.685921	135.37	188.187	176.992	113.489	98.8697	130.978	ENST00000553425.1	14	-	38025362	38028689	3327	2	ENSG00000259087.1	Intergenic	ENSEMBL
p20736	1.79168e-07	4.97199e-09	0.686346	93.9955	186.59	199.62	93.9432	135.008	100.636	TCONS_00027126	19	+	56905411	56910709	5298	4	XLOC_013167	Divergent	HumanLincRNACatalog
p26841	0.0472273	1.53066e-06	0.686921	195830	149029	191244	101190	55073.8	211996	HIT000271588	5	-	79947240	79947865	625	1	HIX0032090	Intronic	H-InvDB
p3738	3.48735e-06	4.6521e-06	0.687396	84.0989	60.7525	74.7286	39.4734	43.0516	68.4134	ENST00000549261.1	12	+	69843249	69854504	11255	3	ENSG00000257507.1	Intergenic	ENSEMBL
p10574	2.28171e-05	1.44595e-11	0.688007	304.07	181.447	395.079	129.133	232.042	244.681	ENST00000400436.2	20	+	37075296	37079564	4268	3	ENSG00000174365.14	Intergenic	ENSEMBL
p33377	2.11441e-10	4.22508e-08	0.688044	744.355	116.507	540.813	43.9623	429.93	490.522	ENST00000488700.1	10	+	97889491	97915776	26285	6	ENSG00000177853.10	Antisense	ENSEMBL
p22077	0.647388	6.38652e-06	0.68807	615.897	872.221	891.742	115.08	144.252	1378.18	TCONS_00006888	3	+	71834784	71837924	3140	3	XLOC_002701	Divergent	HumanLincRNACatalog
p12185	0.490641	8.10634e-10	0.688513	87.2109	60.0598	40.5974	61.9727	5.64511	61.7319	ENST00000447975.1	3	+	194868599	194873519	4920	2	ENSG00000230266.1	Intronic	ENSEMBL
p26072	0.0488967	0.220038	0.688531	114.442	185.948	158.828	188.113	54.9983	73.0741	uc002oet.3	19	+	37266689	37267980	1291	1	BC024306	Intergenic	UCSC
p13899	0.000912597	0.00286344	0.688567	39243.5	85410.5	80441.7	88527	10661.3	42033.9	ENST00000602502.1	5	+	134734969	134736986	2017	1	ENSG00000270021.1	Antisense	ENSEMBL
p24876	0.0016593	2.4848e-11	0.688654	101.973	181.704	174.181	110.278	119.66	85.3678	NR_038309.1	11	-	42209292	42275240	65948	6	LOC100507205	Intergenic	RefSeq
p8119	0.00160273	2.19156e-09	0.688706	4207.9	4089.02	1568.56	981.254	2064.56	3748.6	ENST00000588225.1	19	-	1457894	1462764	4870	2	ENSG00000267317.1	Antisense	ENSEMBL
p22629	1.81705e-07	0.063355	0.689008	60.0461	20.0272	64.2445	49.4534	11.4062	38.5765	TCONS_00008969	4	+	188123144	188135298	12154	4	XLOC_003825	Intergenic	HumanLincRNACatalog
p18207	1.53972e-07	0.490213	0.689145	59.6337	63.1838	29.0348	69.0963	4.7616	30.7904	TCONS_00018332	10	+	110759919	110778745	18826	2	XLOC_008610	Intergenic	HumanLincRNACatalog
p5999	1.47229e-05	4.24002e-08	0.689476	57.6429	65.3426	20.0513	10.8905	57.5606	30.1693	ENST00000564385.1	16	-	35019939	35021258	1319	1	ENSG00000260611.1	Intergenic	ENSEMBL
p22606	3.83182e-05	0.0962234	0.689882	84.775	64.5364	66.9873	58.9502	7.0808	83.1896	TCONS_00008336	4	+	175008678	175101572	92894	2	XLOC_003786	Intergenic	HumanLincRNACatalog
p12858	0.0360289	1.20787e-08	0.690427	77.0607	86.5854	79.4798	65.1592	73.9649	28.7367	ENST00000506100.1	4	+	121560244	121571943	11699	2	ENSG00000249409.1	Intergenic	ENSEMBL
p11708	3.87169e-08	0.0405087	0.691847	104.354	143.114	62.5053	49.8683	47.304	117.282	ENST00000435651.1	3	+	6190170	6407572	217402	3	ENSG00000226022.1	Intergenic	ENSEMBL
p6741	1.21824e-10	1.65048e-12	0.691942	106.895	177.203	139.463	15.3946	96.2086	181.476	ENST00000580507.1	17	-	21760933	21792935	32002	2	ENSG00000263609.1	Intergenic	ENSEMBL
p11748	0.0689324	0.000439076	0.692088	307.1	403.493	414.761	104.312	312.412	362.12	ENST00000425799.2	3	+	18735378	18959184	223806	8	ENSG00000228956.3	Intergenic	ENSEMBL
p15211	0.565984	0.0380112	0.692255	290.512	417.834	249.938	231.622	112.449	319.306	ENST00000444210.2	7	+	5515434	5519442	4008	2	ENSG00000230733.2	Antisense	ENSEMBL
p28847	1.88385e-06	4.24863e-14	0.692402	66.7816	97.2018	35.3111	25.2713	35.7486	76.9718	LIT3532	None	None	None	None	#VALUE!	None	LIT3532	Antisense	RNAdb
p4666	0.00110524	0.00271434	0.693439	997.923	861.645	906.994	290.111	351.632	1276.7	ENST00000555875.1	14	-	100157781	100159985	2204	3	ENSG00000258672.1	Antisense	ENSEMBL
p5589	0.127679	0.00152514	0.693488	330.064	160.073	370.052	86.01	185.344	325.177	ENST00000560594.1	15	+	58879705	58883875	4170	2	ENSG00000259250.1	Intergenic	ENSEMBL
p27356	2.91538e-09	7.22017e-14	0.693641	66.9273	22.5858	71.0518	12.3806	41.4063	57.5876	uc.450+	19	+	31587625	31587836	211	1	uc.450+	Intergenic	UCR
p12945	0.359525	1.16711e-05	0.693792	169.319	162.812	10.8533	119.409	18.5007	100.05	ENST00000593486.1	4	+	156226149	156267521	41372	5	ENSG00000250910.2	Antisense	ENSEMBL
p23107	4.03768e-05	0.374999	0.694514	115.242	1.97812	113.115	106.624	29.6583	23.689	TCONS_00010832	5	+	172203496	172204830	1334	2	XLOC_004635	Intergenic	HumanLincRNACatalog
p14013	0.000322684	9.45005e-08	0.69514	60.3048	89.9253	10.4767	25.331	52.6891	33.6936	ENST00000518387.1	5	+	169816496	169849848	33352	3	ENSG00000253647.1	Intronic	ENSEMBL
p6806	4.74844e-08	9.59073e-11	0.696241	83.2177	33.3791	54.8388	2.61037	28.5337	88.2165	ENST00000587668.1	17	-	34232041	34233276	1235	2	ENSG00000266999.1	Intergenic	ENSEMBL
p9619	1.63825e-09	0.00484753	0.69659	199.568	123.932	289.847	58.0135	94.1957	275.042	ENST00000437798.1	2	+	197568	202605	5037	2	ENSG00000227061.1	Intergenic	ENSEMBL
p2694	1.98888e-06	4.50573e-05	0.696729	46.8506	38.4372	91.3892	45.4457	50.2062	27.4441	ENST00000530313.1	11	+	27661435	27681196	19761	2	ENSG00000245573.3	Antisense	ENSEMBL
p25887	0.000400604	1.96703e-06	0.697084	85.7033	87.4501	23.8423	52.9089	25.302	59.1117	uc001wqj.1	14	-	30084073	30085037	964	1	BC062469	Intronic	UCSC
p4989	9.70279e-11	1.88568e-11	0.697711	102.161	92.6037	195.139	79.5733	11.5315	180.935	ENST00000553367.1	14	+	101129422	101134109	4687	3	ENSG00000196273.3	Intergenic	ENSEMBL
p384	0.00027898	7.35119e-17	0.698077	59.8051	63.2933	72.659	79.3572	29.1867	28.1098	ENST00000447389.1	1	-	143188794	143196803	8009	4	ENSG00000232274.1	Intergenic	ENSEMBL
p29524	0.00924812	2.2381e-05	0.698199	108.45	137.098	93.5174	53.9256	110.119	72.6902	ENST00000431981.2	9	+	35772307	35790429	18122	3	ENSG00000227388.2	Intergenic	ENSEMBL
p19869	0.342303	2.02328e-11	0.698293	95.2661	137.334	110.441	37.3976	149.763	52.3818	TCONS_00024598	16	-	20365461	20367740	2279	2	XLOC_011891	Intergenic	HumanLincRNACatalog
p15710	0.00673375	0.00121785	0.698738	50.2982	42.8387	2.19579	7.67746	31.1834	27.7517	ENST00000518750.1	8	-	58943892	58945241	1349	2	ENSG00000253523.1	Antisense	ENSEMBL
p19019	4.71722e-08	3.01012e-07	0.699341	74.3542	9.13955	96.3406	5.68496	62.9195	57.161	TCONS_00021981	13	-	43423873	43437077	13204	2	XLOC_010584	Intergenic	HumanLincRNACatalog
p3528	1.70442e-10	4.84016e-06	0.699563	65.2096	58.7923	98.7301	49.9129	43.9465	61.9557	ENST00000439543.2	12	+	7080078	7095921	15843	7	ENSG00000126749.7	Antisense	ENSEMBL
p25107	7.84292e-06	1.47399e-11	0.699969	1362.71	1277.25	205.504	29.5726	893.492	1068.67	NR_038422.2	19	+	9945882	9960365	14483	5	PIN1	Antisense	RefSeq
p2802	0.110456	0.104834	0.700123	1028.43	95.7907	1251.47	703.457	141.154	818.664	ENST00000527061.1	11	+	66176628	66177474	846	2	ENSG00000254510.1	Intergenic	ENSEMBL
p18267	2.26384e-07	0.00470481	0.700127	83.9147	52.1581	61.0613	28.4871	37.0695	72.4622	TCONS_00019573	11	-	9778137	9779392	1255	2	XLOC_009371	Intergenic	HumanLincRNACatalog
p28152	4.60819e-10	1.67453e-08	0.700134	1376.21	1266.18	970.109	488.427	9.96065	2030.84	int-HOXB3-79	17	+	43997058	43997657	599	1	int-HOXB3-79	Intronic	HOX Loci
p24289	4.58657e-08	0.529968	0.700431	61.0375	72.9003	92.1378	71.0456	21.1221	66.1825	TCONS_00016770	9	-	38071391	38072082	691	2	XLOC_007686	Intergenic	HumanLincRNACatalog
p17369	6.17739e-05	3.74802e-09	0.70064	78.2997	48.1822	90.9547	57.6681	36.2922	58.3846	TCONS_00001418	1	-	23878412	23881254	2842	2	XLOC_000737	Intergenic	HumanLincRNACatalog
p22876	2.55036e-05	0.261322	0.700652	118.128	69.3161	67.5602	10.4491	41.0494	127.17	TCONS_00009837	5	+	2268284	2278578	10294	2	XLOC_004253	Intergenic	HumanLincRNACatalog
p26550	0.00220772	0.0102323	0.701435	3509.57	2736.23	2045.89	1725.18	1526.62	2564.28	uc021zxw.1	HSCHR6_MHC_SSTO_CTG1	-	3935733	3936832	1099	2	HLA-DRB5	Intronic	UCSC
p4600	0.000179367	0.00160904	0.701656	168.636	126.129	119.186	4.33736	75.1945	210.92	ENST00000553991.1	14	-	77388182	77390992	2810	4	ENSG00000259058.1	Intergenic	ENSEMBL
p33949	2.11441e-10	1.6575e-16	0.701932	649.733	829.142	774.115	510.91	591.608	478.928	KRASP1|NR_004420.1	None	None	None	None	#VALUE!	None	KRASP1|NR_004420.1	Intergenic	lncRNAdb
p33943	9.66448e-11	6.15626e-12	0.701947	4407	3726.75	4665.79	1099.24	4994.16	2891.21	LIT3550	None	None	None	None	#VALUE!	None	LIT3550	Antisense	RNAdb
p711	0.618823	0.000892622	0.702499	205.866	261.212	111.31	132.478	78.8643	194.975	ENST00000561926.1	1	-	239411107	239414118	3011	1	ENSG00000259776.1	Intergenic	ENSEMBL
p24394	0.0393147	4.31235e-07	0.703351	82.3791	96.8064	7.62843	49.3316	31.7216	50.3426	TCONS_00016515	9	-	139509639	139519693	10054	3	XLOC_007896	Intergenic	HumanLincRNACatalog
p9961	0.0274133	8.6411e-11	0.703744	227.755	139.615	168.434	69.3941	9.18057	298.495	ENST00000451179.1	2	+	113993106	114023747	30641	5	ENSG00000189223.8	Antisense	ENSEMBL
p3330	6.96794e-13	0.0225488	0.703801	104.134	131.783	198.721	18.0579	140.039	147.802	ENST00000550687.1	12	-	94288740	94337379	48639	3	ENSG00000257283.1	Intergenic	ENSEMBL
p15269	2.49331e-05	3.25878e-05	0.704293	98.3921	139.842	52.1217	76.5857	38.7928	89.1172	ENST00000420774.1	7	+	26438271	26439274	1003	2	ENSG00000214870.4	Intergenic	ENSEMBL
p23949	2.14615e-06	0.000713209	0.704416	225.039	270.594	155.033	58.641	123.319	276.379	TCONS_00014978	8	-	38408980	38410871	1891	2	XLOC_007057	Intergenic	HumanLincRNACatalog
p9291	7.52403e-09	3.23206e-08	0.704494	6574.46	4719.69	4853.95	4094.12	1816.73	5465.4	ENST00000419736.1	2	-	112186888	112252628	65740	4	ENSG00000172965.7	Intergenic	ENSEMBL
p8278	4.50436e-07	1.5233e-10	0.70461	59.5297	45.5128	54.4761	64.011	6.79697	41.5904	ENST00000582581.1	19	-	29777917	30016659	238742	10	ENSG00000264515.1	Divergent	ENSEMBL
p18611	4.28608e-07	0.000282129	0.704611	682.644	711.307	603.677	189.991	932.227	285.333	TCONS_00020761	12	-	40537620	40552325	14705	4	XLOC_010052	Intergenic	HumanLincRNACatalog
p26009	0.551362	2.13906e-11	0.704732	105.199	175.441	23.9547	14.6278	150.28	49.7497	uc002ilo.1	17	-	45401615	45402367	752	1	AX748120	Antisense	UCSC
p18294	1.4109e-05	0.662528	0.704887	95.242	119.01	183.209	107.256	98.6046	74.3036	TCONS_00019616	11	-	35150430	35158084	7654	2	XLOC_009416	Intergenic	HumanLincRNACatalog
p25380	1.53333e-05	4.08284e-06	0.704932	99.0767	97.4639	163.294	43.4397	139.368	70.8517	NR_026776.1	6	-	26987144	26988085	941	1	LOC100270746	Intergenic	RefSeq
p11099	0.996451	1.84562e-08	0.705282	291.159	352.145	390.023	187.65	298.968	242.169	ENST00000429962.1	22	+	21356210	21357561	1351	2	ENSG00000230513.1	Antisense	ENSEMBL
p13190	0.000342796	5.1049e-05	0.705762	103.512	77.0602	122.673	106.604	1.42088	105.993	ENST00000502882.1	5	-	63253719	63276870	23151	2	ENSG00000248285.1	Antisense	ENSEMBL
p13393	0.00108081	6.84657e-16	0.706226	280.517	462.263	493.035	220.411	331.394	320.959	ENST00000502827.1	5	-	128795251	128796382	1131	2	ENSG00000249421.1	Antisense	ENSEMBL
p7415	0.00358233	1.1161e-06	0.706406	86.5313	44.6862	46.988	10.8678	50.269	64.7487	ENST00000515692.1	17	+	47964960	47978257	13297	5	ENSG00000248954.1	Intergenic	ENSEMBL
p24257	5.74164e-11	1.29141e-08	0.706565	135.66	191.276	121.875	12.4958	114.24	190.379	TCONS_00014878	8	+	142335131	142337228	2097	2	XLOC_006946	Intergenic	HumanLincRNACatalog
p7142	0.00322791	1.29186e-11	0.707156	682.522	493.02	658.031	542.531	223.718	530.374	ENST00000570712.1	17	+	5017067	5017671	604	2	ENSG00000234327.2	Intronic	ENSEMBL
p29225	2.35079e-07	5.48481e-07	0.707522	98.2338	76.669	157.167	24.8627	123.392	86.6915	ENST00000591116.1	19	+	37742823	37756375	13552	6	ENSG00000226686.2	Intergenic	ENSEMBL
p16806	0.0255267	0.163615	0.707654	80.9718	36.2286	91.0363	56.0211	50.3314	41.0071	ENST00000417801.1	9	+	82645493	82649470	3977	2	ENSG00000230945.1	Intergenic	ENSEMBL
p28891	0.005545	1.10089e-15	0.70825	994.369	906.98	1293.75	861.503	530.258	871.168	LIT3604	None	None	None	None	#VALUE!	None	LIT3604	Antisense	RNAdb
p4547	2.23653e-07	9.88877e-05	0.708591	62.232	98.1047	68.293	62.5547	35.9894	63.4609	ENST00000555861.1	14	-	64796148	64803287	7139	3	ENSG00000214770.2	Intergenic	ENSEMBL
p27844	2.57897e-07	4.47699e-18	0.708816	40.5077	47.7127	47.1712	39.1594	15.8122	40.9961	uc.460+	X	+	24823510	24823785	275	1	uc.460+	Intronic	UCR
p24696	9.27737e-07	9.47492e-12	0.708971	136.516	29.5235	176.655	11.0844	22.2808	209.595	TCONS_00017186	X	+	64254713	64272117	17404	2	XLOC_007999	Divergent	HumanLincRNACatalog
p12238	2.82629e-08	3.66481e-06	0.709302	202.52	270.608	251.975	107.09	83.0672	324.159	ENST00000515186.1	4	-	8455136	8456669	1533	2	ENSG00000251186.1	Antisense	ENSEMBL
p8217	0.031909	3.86875e-16	0.709741	125.38	188.02	74.9265	180.943	2.76847	91.8994	ENST00000598385.1	19	-	18122107	18142348	20241	3	ENSG00000268298.1	Antisense	ENSEMBL
p11696	0.333051	4.8121e-09	0.709881	225.482	205.838	188.886	81.1757	91.4415	267.656	ENST00000441644.1	3	-	196358368	196359458	1090	2	ENSG00000232065.1	Intergenic	ENSEMBL
p2059	1.51366e-09	9.48479e-08	0.709974	42.6219	15.6825	53.0058	35.9588	13.4429	29.6257	ENST00000437032.1	10	+	91043562	91044311	749	2	ENSG00000232110.3	Intergenic	ENSEMBL
p27740	7.60821e-07	3.78201e-09	0.710334	79.2188	36.3021	77.1942	29.0885	21.5244	86.2793	uc.245-	8	-	106333831	106334170	339	1	uc.245-	Intronic	UCR
p20350	1.47687e-06	1.55012e-10	0.710422	101.936	198.379	194.299	61.4712	133.746	156.168	TCONS_00025982	17	+	75251162	75255415	4253	2	XLOC_012315	Intergenic	HumanLincRNACatalog
p14244	1.26526e-05	4.82901e-07	0.710624	59.2667	55.3527	99.7136	44.8667	71.5996	35.8438	ENST00000421704.1	6	-	72126086	72129970	3884	3	ENSG00000233237.2	Intergenic	ENSEMBL
p30340	1.88235e-06	1.35419e-14	0.710803	44.1023	21.6687	25.2861	31.0129	15.6601	18.0507	ENST00000435097.2	8	+	144823267	144828506	5239	1	ENSG00000203499.6	Intergenic	ENSEMBL
p24058	1.74374e-05	2.4177e-09	0.711613	76.9939	17.1777	82.8085	33.6847	4.66797	87.5886	TCONS_00015181	8	-	137249530	137255634	6104	4	XLOC_007235	Intergenic	HumanLincRNACatalog
p14068	2.08662e-05	6.74909e-10	0.711687	695.365	426.668	927.504	359.278	535.563	563.787	ENST00000433265.3	5	+	180690634	180691230	596	2	ENSG00000248275.1	Intergenic	ENSEMBL
p23114	4.11012e-05	1.05496e-06	0.711703	87.8251	80.3259	52.5296	36.6358	8.90002	111.523	TCONS_00010179	5	+	172923686	172951116	27430	5	XLOC_004641	Intergenic	HumanLincRNACatalog
p19646	0.0335917	9.76648e-07	0.711814	96.7649	157.002	120.898	121.478	11.931	133.283	TCONS_00023791	15	-	93325222	93331832	6610	3	XLOC_011586	Intergenic	HumanLincRNACatalog
p20154	0.0106544	8.84638e-09	0.712049	83.791	97.49	73.5085	49.009	75.8731	56.5404	TCONS_00025609	17	-	32517543	32523223	5680	2	XLOC_012441	Intergenic	HumanLincRNACatalog
p25593	2.17311e-10	0.64142	0.712073	661.605	768.181	605.114	959.999	118.311	370.688	NR_015427.2	9	+	136890560	136896719	6159	3	LINC00094	Antisense	RefSeq
p29421	1.17334e-10	0.697141	0.7122	2622.98	2229.23	708.147	545.404	2542.11	872.568	ENST00000427306.2	5	+	111496225	111497999	1774	2	ENSG00000224032.2	Divergent	ENSEMBL
p21459	0.00118682	0.037178	0.712211	102.252	60.5558	180.028	78.431	125.495	40.2444	TCONS_00028450	20	-	55039242	55043472	4230	2	XLOC_013809	Divergent	HumanLincRNACatalog
p20028	1.36653e-12	0.000249919	0.712402	103.361	166.973	194.834	92.2763	93.9179	145.192	TCONS_00024398	16	+	51558114	51559006	892	2	XLOC_011721	Intergenic	HumanLincRNACatalog
p9334	1.13195e-05	9.94135e-07	0.712439	61.6711	87.5254	75.3507	86.3487	34.0606	39.5669	ENST00000448777.1	2	-	131501110	131513452	12342	2	ENSG00000229797.1	Antisense	ENSEMBL
p9771	9.25745e-08	0.00214983	0.712442	59.2981	68.1351	80.1295	5.62575	65.4923	76.7583	ENST00000420187.1	2	+	40973626	40994592	20966	4	ENSG00000233128.1	Intergenic	ENSEMBL
p28959	9.62234e-11	3.13747e-08	0.712584	3996.8	4642.76	3338.1	4516.26	2837.77	1181.05	ENST00000431268.1	1	-	173833038	173837127	4089	8	ENSG00000234741.2	Divergent	ENSEMBL
p21685	0.147855	8.4612e-08	0.71263	166.363	69.0916	131.119	65.4617	70.2934	125.476	TCONS_00029009	21	+	37756424	37757219	795	2	XLOC_013932	Divergent	HumanLincRNACatalog
p24325	0.0336741	8.35564e-05	0.713414	59.0387	27.7001	47.4216	37.6131	24.972	33.1268	TCONS_00016402	9	-	93736513	93747020	10507	3	XLOC_007773	Intergenic	HumanLincRNACatalog
p33753	0.00514517	4.58432e-07	0.713565	1059.59	367.582	1169.55	551.356	192.775	1108.8	uc009xkf.1	10	+	21823573	21884369	60796	5	MLLT10	Antisense	UCSC
p11005	3.54051e-06	1.95321e-06	0.714547	4792.94	2917.67	993.261	589.208	1428.46	4201.65	ENST00000602847.1	22	-	31372500	31374834	2334	2	ENSG00000269987.1	Intergenic	ENSEMBL
p1490	9.09634e-12	8.72717e-08	0.714765	631.466	577.607	923.79	862.903	289.981	371.612	ENST00000596567.1	10	-	5754382	5756386	2004	2	ENSG00000226647.2	Antisense	ENSEMBL
p1647	7.6943e-09	0.106918	0.71502	58.5992	24.2655	65.8071	13.4799	20.3468	72.4765	ENST00000456546.1	10	-	81263828	81266037	2209	2	ENSG00000241317.1	Intergenic	ENSEMBL
p6321	7.90397e-06	1.8981e-13	0.715268	165.174	64.8859	115.054	54.1165	11.756	180.976	ENST00000568827.1	16	+	22386179	22387594	1415	1	ENSG00000260790.1	Divergent	ENSEMBL
p2165	1.24165e-05	4.31835e-07	0.715406	344.486	290.873	388.739	112.351	125.064	495.231	ENST00000529961.1	11	-	6129364	6206806	77442	3	ENSG00000254444.1	Antisense	ENSEMBL
p19314	0.0721231	1.08003e-12	0.716749	75.7365	81.5058	37.1073	43.105	36.0323	60.1624	TCONS_00023107	14	-	52884399	52889572	5173	2	XLOC_011025	Intergenic	HumanLincRNACatalog
p33932	1.01597e-10	9.56331e-05	0.717083	11531.5	3145.87	3052.86	382.88	4033.05	8298.12	LIT2059	None	None	None	None	#VALUE!	None	LIT2059	Intergenic	RNAdb
p12895	3.95931e-11	2.8501e-05	0.718475	126.75	191.225	142.155	85.5584	70.2546	174.778	ENST00000510767.1	4	+	139010167	139099331	89164	7	ENSG00000250033.1	Antisense	ENSEMBL
p6591	0.00391663	7.5203e-09	0.718731	166.646	117.87	183.346	95.694	77.9712	162.602	ENST00000440406.2	16	+	88797587	88805596	8009	3	ENSG00000224888.3	Antisense	ENSEMBL
p20096	2.92659e-07	0.003408	0.719073	116.736	189.694	127.466	91.4591	47.9168	172.627	TCONS_00024490	16	+	86052352	86061287	8935	2	XLOC_011810	Intergenic	HumanLincRNACatalog
p24359	0.000763575	5.01421e-06	0.719097	60.1682	95.0987	56.1725	31.9481	81.2652	38.8321	TCONS_00016469	9	-	118369850	118505348	135498	3	XLOC_007835	Intergenic	HumanLincRNACatalog
p10462	0.00700698	4.21136e-12	0.720041	411.195	561.749	602.83	482.493	118.903	533.227	ENST00000437920.1	20	-	46020672	46041071	20399	4	ENSG00000224565.1	Intergenic	ENSEMBL
p13542	2.19824e-05	0.000105109	0.720092	614.867	665.065	976.746	468.635	28.4372	1127.94	ENST00000511565.1	5	-	176870067	176871478	1411	2	ENSG00000246334.2	Divergent	ENSEMBL
p23096	3.89612e-07	0.0330909	0.720356	74.8872	55.7609	76.0931	31.4378	66.3654	51.1241	TCONS_00010826	5	+	163897275	163969120	71845	3	XLOC_004626	Intergenic	HumanLincRNACatalog
p18621	0.0160412	1.7473e-10	0.721108	79.6387	35.5255	97.304	81.3573	13.6897	58.1656	TCONS_00020779	12	-	49681291	49683068	1777	2	XLOC_010069	Intergenic	HumanLincRNACatalog
p1779	8.17458e-05	0.421291	0.721569	58.1119	31.2974	89.9582	43.0108	55.2917	31.1236	ENST00000601242.1	10	-	128798540	128824686	26146	4	ENSG00000223528.2	Antisense	ENSEMBL
p17987	3.0406e-07	0.00430446	0.72167	75.9466	84.0926	73.7074	40.4096	62.1637	66.1146	TCONS_00017692	10	-	91451056	91457685	6629	2	XLOC_008897	Intergenic	HumanLincRNACatalog
p13879	4.55845e-09	1.79246e-08	0.721967	45.9174	41.5617	97.0262	63.5462	33.4062	36.2544	ENST00000513708.1	5	+	127270934	127277199	6265	2	ENSG00000230561.3	Intergenic	ENSEMBL
p4968	0.0400335	3.91475e-07	0.722196	103.47	105.19	197.262	40.604	167.325	85.2264	ENST00000554445.1	14	+	97621193	97625073	3880	2	ENSG00000259110.1	Intergenic	ENSEMBL
p23423	0.0544443	0.29478	0.722526	127.339	148.193	141.416	22.2211	183.791	95.2434	TCONS_00011758	6	+	27677988	27680876	2888	3	XLOC_005220	Intergenic	HumanLincRNACatalog
p10378	1.87685e-10	2.0105e-06	0.722604	64.5408	84.0419	67.3712	16.6328	45.9453	93.4709	ENST00000434043.2	20	-	21129381	21139382	10001	6	ENSG00000228604.3	Intronic	ENSEMBL
p21520	2.81451e-08	3.8345e-13	0.723159	61.1604	78.3926	0.382657	11.4759	44.5148	45.2049	TCONS_00028125	20	+	22370850	22371509	659	2	XLOC_013484	Intergenic	HumanLincRNACatalog
p10260	1.71153e-08	1.88869e-06	0.723309	94.6844	196.816	91.3015	106.916	55.221	114.747	ENST00000598002.1	2	+	219840954	219841469	515	2	ENSG00000236445.2	Intergenic	ENSEMBL
p4825	1.22988e-08	3.44504e-10	0.723326	64.0479	93.8568	60.1078	32.7171	30.4745	94.5026	ENST00000569625.1	14	+	56382444	56383044	600	1	ENSG00000259868.1	Intergenic	ENSEMBL
p14931	0.000642995	0.546185	0.723491	2676.62	3678.4	1063.13	1870.65	1554.8	1941.52	ENST00000568457.1	7	-	44998597	45000508	1911	1	ENSG00000260997.1	Intergenic	ENSEMBL
p26079	5.83384e-06	0.000595797	0.723671	46.7395	26.2043	70.6956	7.30323	66.6797	29.9648	uc002pxm.1	19	+	52206206	52208101	1895	3	LINC00085	Intergenic	UCSC
p27494	4.44584e-07	1.98015e-08	0.725748	87.0566	98.0927	82.2423	26.297	39.3097	128.452	uc.483-	3	-	17592728	17593130	402	1	uc.483-	Intronic	UCR
p26168	1.52413e-06	2.35855e-10	0.725897	170.922	88.2959	196.081	0.432994	146.105	183.962	uc021wiq.1	21	+	35269910	35272163	2253	1	intersectin 1 long form	Intergenic	UCSC
p1875	1.36833e-10	1.51111e-05	0.727243	43647	78229.1	31219	12549.6	23026.8	75761.1	ENST00000422675.1	10	+	22650100	22701996	51896	2	ENSG00000233451.1	Antisense	ENSEMBL
p916	2.54086e-06	5.51825e-10	0.727726	64.3112	6.46313	74.2322	19.1426	28.6816	57.7008	ENST00000440249.1	1	+	42001113	42001539	426	2	ENSG00000230881.1	Intronic	ENSEMBL
p8304	0.800118	0.000787016	0.728262	124.119	77.9889	183.096	116.436	44.2708	119.823	ENST00000600959.1	19	-	35489136	35491074	1938	3	ENSG00000269303.1	Divergent	ENSEMBL
p8546	8.63095e-07	5.27755e-17	0.728329	1117.01	1375.98	1371.7	1051.84	117.446	1645.48	ENST00000592371.1	19	+	9455459	9456574	1115	1	ENSG00000266912.1	Intronic	ENSEMBL
p11098	0.000534383	6.81434e-19	0.729262	312.395	393.428	379.091	87.035	462.069	242.082	ENST00000444039.1	22	+	21311379	21318967	7588	2	ENSG00000237476.1	Divergent	ENSEMBL
p7555	6.1378e-13	1.63195e-11	0.729604	96.8915	0.680148	157.305	9.77627	33.9653	142.218	ENST00000442532.1	17	+	79486065	79494802	8737	2	ENSG00000229848.1	Divergent	ENSEMBL
p10436	0.0407518	2.91873e-12	0.729658	85.3432	11.1303	63.3278	4.53473	69.7206	42.3449	ENST00000437016.1	20	-	36916732	36954938	38206	3	ENSG00000206249.3	Antisense	ENSEMBL
p19907	0.000594459	0.00549688	0.730324	79.7282	32.7776	14.7256	25.2307	3.38916	64.3003	TCONS_00024696	16	-	65175262	65209216	33954	2	XLOC_011976	Intergenic	HumanLincRNACatalog
p9026	1.04192e-06	1.29128e-06	0.730426	171.053	139.483	190.896	157.69	7.33467	201.234	ENST00000417751.1	2	-	13850655	14541087	690432	5	ENSG00000230448.1	Intergenic	ENSEMBL
p23356	4.98113e-05	9.82782e-06	0.730667	84.757	31.6569	96.0312	0.366214	36.9228	117.938	TCONS_00011649	6	+	3026410	3027751	1341	2	XLOC_005131	Intergenic	HumanLincRNACatalog
p17993	5.76311e-08	0.0273013	0.73076	63.1135	75.9479	11.8618	33.0489	33.2271	44.0126	TCONS_00018033	10	-	103082399	103082763	364	2	XLOC_008924	Intergenic	HumanLincRNACatalog
p21819	2.4339e-09	3.39339e-12	0.731749	405.689	291.255	767.581	40.0242	457.02	574.621	TCONS_00029850	22	+	51030491	51033971	3480	2	XLOC_014288	Intergenic	HumanLincRNACatalog
p8863	0.428487	2.67516e-15	0.732382	110.99	65.5393	136.382	162.828	18.6994	47.6427	ENST00000593109.1	19	+	56905179	56905802	623	2	ENSG00000267454.1	Divergent	ENSEMBL
p3182	1.07526e-05	1.82434e-12	0.732439	106.933	28.8035	170.739	2.3334	87.652	134.489	ENST00000552905.1	12	-	53408412	53440743	32331	3	ENSG00000257337.1	Antisense	ENSEMBL
p8813	4.19534e-08	5.26103e-06	0.73322	3064.89	4417.37	3223.41	671.411	2871.62	4306.59	ENST00000598079.1	19	+	51333785	51354345	20560	3	ENSG00000267968.1	Antisense	ENSEMBL
p23917	3.44434e-09	4.95211e-05	0.733251	310.757	333.842	405.558	173.255	54.6984	542.074	TCONS_00014924	8	-	8084255	8085129	874	2	XLOC_006994	Intergenic	HumanLincRNACatalog
p20680	4.55044e-06	1.35511e-08	0.733639	107.503	136.521	193.618	135.807	46.7374	138.526	TCONS_00026976	19	+	29456246	29461590	5344	5	XLOC_013027	Intergenic	HumanLincRNACatalog
p26509	0.0428972	8.93678e-09	0.734145	284.289	110.153	311.422	160.266	95.4376	262.503	uc004bmy.3	9	-	125578330	125579531	1201	1	BC010186	Divergent	UCSC
p5691	1.82963e-09	2.2241e-06	0.73427	198.171	182.496	274.033	193.44	5.15241	282.133	ENST00000568836.1	15	+	80458264	80459322	1058	2	ENSG00000259967.1	Intronic	ENSEMBL
p8310	0.0242036	5.84771e-09	0.734949	4810.59	4732.21	4356.47	772.697	4657.75	4784.81	ENST00000444728.1	19	-	36032861	36036405	3544	3	ENSG00000236144.2	Antisense	ENSEMBL
p2644	0.00105257	1.53302e-05	0.734972	75.3615	18.0954	61.0329	30.1052	27.59	55.8506	ENST00000498905.2	11	+	9779838	9832866	53028	3	ENSG00000246273.2	Antisense	ENSEMBL
p3517	0.00018025	4.4152e-08	0.734999	401.272	691.443	448.861	46.6735	566.876	519.508	ENST00000499202.2	12	+	6652669	6654097	1428	2	ENSG00000245667.2	Intronic	ENSEMBL
p21472	0.0512089	2.08834e-15	0.735273	2951.19	4597.68	1928.29	1491.78	2257.01	3219.51	TCONS_00028462	20	-	61199862	61200695	833	2	XLOC_013835	Intergenic	HumanLincRNACatalog
p6104	0.00103263	3.5668e-08	0.735458	74.2541	86.7312	43.7446	35.2109	56.9629	58.3966	ENST00000570152.1	16	-	72604379	72698848	94469	4	ENSG00000261008.2	Intergenic	ENSEMBL
p16309	0.40114	4.89502e-06	0.735514	95.6372	115.226	38.1681	70.8295	53.0596	59.2771	ENST00000518090.1	8	+	102151892	102153157	1265	3	ENSG00000253737.1	Intergenic	ENSEMBL
p2356	0.0078715	0.00164706	0.735558	704.103	876.951	524.439	516.899	360.158	671.657	ENST00000602344.1	11	-	65265480	65265876	396	1	ENSG00000270117.1	Intergenic	ENSEMBL
p7698	0.000420605	4.48381e-07	0.735834	89.5562	64.138	17.2782	31.3142	7.5233	86.9698	ENST00000582233.1	18	-	29671257	29672082	825	2	ENSG00000265008.1	Antisense	ENSEMBL
p13422	9.62215e-11	0.0661077	0.736008	3955.92	4069.02	2115.92	1740.74	4551.7	1171.31	ENST00000503553.1	5	-	138700365	138705406	5041	2	ENSG00000249758.1	Antisense	ENSEMBL
p20421	0.000297273	3.83334e-10	0.736155	720.225	734.012	289.057	48.7275	104.222	1130.38	TCONS_00026518	18	-	45346665	45356490	9825	2	XLOC_012839	Intergenic	HumanLincRNACatalog
p1831	1.07712e-05	0.25313	0.736886	214.39	269.691	215.271	140.672	121.064	253.607	ENST00000415358.1	10	+	3810106	3810943	837	2	ENSG00000228353.1	Intergenic	ENSEMBL
p20040	3.82492e-06	1.97198e-10	0.736898	84.8622	95.2494	82.3645	32.4113	81.8572	79.1495	TCONS_00024415	16	+	52615179	52624898	9719	3	XLOC_011725	Intergenic	HumanLincRNACatalog
p4352	1.05961e-07	5.55511e-06	0.738625	87.6	53.117	44.3126	32.1904	11.2652	93.2118	ENST00000550512.1	14	-	19670479	19673623	3144	2	ENSG00000228294.2	Intergenic	ENSEMBL
p22963	1.99939e-10	2.5345e-05	0.739055	63.827	78.4285	44.4401	20.4259	63.4554	54.0971	TCONS_00009933	5	+	42922835	42924839	2004	2	XLOC_004361	Intergenic	HumanLincRNACatalog
p5886	4.85998e-07	2.08854e-06	0.73918	75.6973	99.4756	48.618	39.3291	52.3526	73.7401	ENST00000573319.1	16	-	11913706	11922668	8962	4	ENSG00000262117.1	Intergenic	ENSEMBL
p19578	2.82804e-06	4.31126e-07	0.739525	204.282	281.532	95.6278	149.807	71.4663	208.718	TCONS_00024118	15	-	48097020	48138432	41412	5	XLOC_011470	Intergenic	HumanLincRNACatalog
p18892	3.94776e-05	0.586487	0.740782	79.8945	86.7841	61.2906	84.8352	9.77256	74.2677	TCONS_00020509	12	+	89968490	89972126	3636	2	XLOC_009826	Intergenic	HumanLincRNACatalog
p15083	5.5485e-07	0.0106196	0.740897	60.7664	40.7122	92.2903	14.3523	71.4363	57.7743	ENST00000456062.1	7	-	119781069	119783050	1981	2	ENSG00000233417.1	Intergenic	ENSEMBL
p3669	0.0835201	0.00156536	0.741105	86.5022	0.909808	75.4825	9.71499	47.5821	63.4248	ENST00000547902.1	12	+	50254989	50259528	4539	4	ENSG00000257253.1	Intergenic	ENSEMBL
p17617	0.000621673	7.87383e-18	0.741628	738.892	885.429	353.761	262.829	109.847	1094.32	TCONS_00001927	1	+	4482999	4484708	1709	2	XLOC_000033	Intergenic	HumanLincRNACatalog
p14617	0.000907571	0.000372296	0.741674	44.1147	13.6623	48.5645	39.1516	19.7701	19.949	ENST00000424678.1	6	+	94596617	94599128	2511	2	ENSG00000229600.1	Intergenic	ENSEMBL
p26303	1.77517e-10	0.00639859	0.741979	1059.07	1342.93	633.444	870.281	765.637	616.318	uc003lzy.3	5	-	167975499	167979974	4475	1	M55536	Intergenic	UCSC
p21483	4.07536e-07	4.24636e-09	0.74232	168.169	104.454	178.893	134.471	27.989	172.709	TCONS_00028474	20	-	62771380	62774940	3560	3	XLOC_013850	Intergenic	HumanLincRNACatalog
p3807	6.18463e-06	1.95314e-09	0.742488	111.742	109.143	199.635	37.8601	139.122	135.25	ENST00000551075.1	12	+	92295233	92299963	4730	3	ENSG00000257863.1	Intergenic	ENSEMBL
p33873	0.000406854	3.49512e-07	0.742566	755.643	229.571	775.007	344.796	290.168	672.116	HIT000076874	20	+	17949688	17950755	1067	2	HIX0015662	Antisense	H-InvDB
p18165	0.132477	5.52913e-11	0.743419	75.8507	29.2455	60.5855	28.3566	41.2748	53.5395	TCONS_00018230	10	+	73134944	73141151	6207	2	XLOC_008510	Intergenic	HumanLincRNACatalog
p620	9.66391e-11	0.00278667	0.743748	40.1833	54.172	94.3157	96.0802	18.3065	25.9369	ENST00000424696.2	1	-	209701799	209741018	39219	7	ENSG00000224260.2	Intergenic	ENSEMBL
p15145	0.000402044	0.688466	0.743756	415.103	653.877	648.898	222.682	534.861	520.139	ENST00000487102.1	7	-	143951188	144052461	101273	3	ENSG00000244479.2	Antisense	ENSEMBL
p9899	0.000161133	3.38491e-10	0.743777	195.854	289.152	184.152	105.378	167.994	224.332	ENST00000599435.1	2	+	98286255	98319424	33169	6	ENSG00000228486.3	Intergenic	ENSEMBL
p27176	0.00130305	0.00464921	0.744026	708.784	352.49	352.491	19.7605	447.701	584.415	uc.354+	13	+	78976828	78977063	235	1	uc.354+	Intergenic	UCR
p12783	5.49054e-07	3.39033e-05	0.744077	98.7871	195.535	80.1181	133.813	37.7655	107.034	ENST00000514836.1	4	+	80748688	80798924	50236	3	ENSG00000251321.1	Intergenic	ENSEMBL
p16546	0.00828637	1.83095e-05	0.744301	608.755	900.184	451.018	631.716	141.148	685.933	ENST00000445280.1	9	-	96197613	96199403	1790	2	ENSG00000227603.1	Intergenic	ENSEMBL
p10930	7.98226e-10	0.00288599	0.744535	745.214	372.521	225.828	513.106	23.5754	463.648	ENST00000588753.1	21	+	47649186	47664779	15593	3	ENSG00000215424.5	Antisense	ENSEMBL
p8826	0.639929	0.000186655	0.7447	1179.75	1331.91	285.209	329.42	149.225	1604.18	ENST00000532473.1	19	+	51917551	51918219	668	2	ENSG00000254760.1	Antisense	ENSEMBL
p13220	4.62645e-05	2.0216e-08	0.745127	89.3199	95.8029	81.6251	54.5974	55.7655	88.3982	ENST00000508255.1	5	-	72427834	72446419	18585	2	ENSG00000251599.1	Divergent	ENSEMBL
p24653	2.21999e-05	4.79251e-07	0.745151	113.831	83.0239	119.909	57.4171	52.939	125.681	TCONS_00017380	X	-	136007155	136018228	11073	2	XLOC_008245	Intergenic	HumanLincRNACatalog
p26749	3.13389e-06	1.29477e-12	0.745378	64.4332	72.0111	82.6293	30.4256	95.2872	37.5798	HIT000067566	2	-	66793322	66793943	621	1	HIX0030115	Intronic	H-InvDB
p33796	0.0397597	6.92417e-12	0.7459	1237.99	611.73	894.319	49.0911	576.586	1421.1	uc021upk.1	19	+	11943741	11946424	2683	1	AX747599	Antisense	UCSC
p26119	0.00087148	9.64807e-10	0.746102	305.172	76.561	144.39	108.586	92.6709	191.285	uc002tji.1	2	+	113963502	113966973	3471	1	AK123617	Intergenic	UCSC
p29336	1.91041e-10	6.54273e-07	0.746301	696.91	794.835	956.654	232.638	565.995	1028.61	ENST00000426112.1	22	+	46937391	46944093	6702	2	ENSG00000234869.1	Intergenic	ENSEMBL
p3815	8.5776e-05	3.43775e-06	0.746491	60.4338	72.1494	41.9629	64.2117	13.8314	52.2538	ENST00000551257.1	12	+	94229942	94231814	1872	2	ENSG00000258303.1	Intronic	ENSEMBL
p23333	6.98746e-08	0.610758	0.747269	78.2972	98.8183	61.4055	29.422	70.6474	78.17	TCONS_00012377	6	-	170470884	170475667	4783	2	XLOC_005945	Intergenic	HumanLincRNACatalog
p7613	0.00530808	1.1349e-12	0.748754	626.536	803.687	457.207	432.459	171.173	809.59	ENST00000579012.1	18	-	6928347	6929965	1618	4	ENSG00000265933.1	Intergenic	ENSEMBL
p28392	9.48212e-07	1.44172e-17	0.74952	64.58	3.42514	67.3173	4.02617	53.0668	44.3339	ASO1988	None	None	None	None	#VALUE!	None	ASO1988	Antisense	RNAdb
p20944	3.13647e-07	1.67048e-10	0.749965	83.4632	28.0103	28.7022	24.724	1.44097	78.962	TCONS_00005257	2	-	157173939	157174852	913	2	XLOC_002366	Intergenic	HumanLincRNACatalog
p29177	0.283625	0.685394	0.750045	316.058	415.781	336.013	75.4173	435.65	289.87	ENST00000400873.3	17	-	62745780	62778117	32337	13	ENSG00000215769.4	Intergenic	ENSEMBL
p4748	1.37189e-08	6.92562e-08	0.75106	325.117	122.615	445.628	81.1451	131.548	458.274	ENST00000556503.1	14	+	23451906	23468287	16381	4	ENSG00000258457.1	Antisense	ENSEMBL
p26304	0.1018	2.411e-09	0.751121	409.923	542.501	352.768	439.021	74.5258	466.81	uc021yja.1	5	-	178046291	178047541	1250	1	AK309215	Intronic	UCSC
p22449	0.00886232	0.000700047	0.75123	100.628	66.3639	128.457	36.6716	102.431	82.8486	TCONS_00008754	4	+	11330173	11339163	8990	3	XLOC_003455	Intergenic	HumanLincRNACatalog
p1013	8.54606e-06	3.44586e-26	0.752351	61.5392	65.056	80.3517	23.0829	97.6574	34.9564	ENST00000594152.1	1	+	71547049	71873367	326318	6	ENSG00000229956.4	Antisense	ENSEMBL
p24739	0.0355092	3.89115e-25	0.752374	59.038	82.4266	55.339	28.8899	86.7576	32.4223	TCONS_00017630	Y	+	7302523	7388562	86039	3	XLOC_008282	Intergenic	HumanLincRNACatalog
p19716	0.00351134	5.49983e-12	0.75255	92.8126	46.588	166.977	61.3131	120.385	48.8667	TCONS_00023886	15	+	26110447	26114704	4257	2	XLOC_011188	Intergenic	HumanLincRNACatalog
p14895	0.00160289	0.00533417	0.752895	77.9986	77.3535	29.603	53.2834	25.1568	60.8116	ENST00000440074.1	7	-	33908112	33913843	5731	3	ENSG00000233219.1	Intergenic	ENSEMBL
p13139	0.180034	4.87838e-07	0.753302	738.194	850.766	810.982	857.275	81.9635	868.643	ENST00000512329.1	5	-	36702579	36725278	22699	3	ENSG00000250155.1	Intergenic	ENSEMBL
p18384	4.75553e-11	4.73469e-07	0.753321	320.381	264.792	308.484	83.2729	125.715	464.223	TCONS_00019784	11	-	121908944	121937140	28196	3	XLOC_009582	Intergenic	HumanLincRNACatalog
p176	9.62325e-11	0.949855	0.753528	60.8721	83.3504	84.6864	18.6361	46.9999	106.853	ENST00000414156.1	1	-	44709079	44709945	866	2	ENSG00000233602.1	Intronic	ENSEMBL
p7536	6.16071e-06	4.76303e-12	0.753727	117.455	144.247	38.4005	1.52339	98.9367	125.735	ENST00000585969.1	17	+	76480991	76490279	9288	4	ENSG00000267432.1	Antisense	ENSEMBL
p2794	0.366165	8.76707e-06	0.753976	78.0916	98.5871	19.0133	16.9441	85.4752	45.1279	ENST00000533886.1	11	+	65134908	65142770	7862	3	ENSG00000255478.1	Antisense	ENSEMBL
p2532	1.10143e-05	4.35001e-13	0.754817	168.633	115.01	156.72	69.8428	69.9867	192.564	ENST00000525787.1	11	-	118898521	118900374	1853	2	ENSG00000137700.11	Antisense	ENSEMBL
p23261	0.00050299	3.92248e-06	0.755727	52.0027	63.8972	11.9066	60.3768	1.05374	35.1563	TCONS_00012257	6	-	113944400	113953599	9199	3	XLOC_005810	Intergenic	HumanLincRNACatalog
p3177	4.46405e-07	7.62518e-09	0.755947	124.584	130.396	173.68	173.257	4.32235	146.465	ENST00000553017.1	12	-	52603532	52604639	1107	2	ENSG00000257137.1	Antisense	ENSEMBL
p7296	0.00352406	0.0286516	0.756025	169.136	130.213	83.7011	98.6431	11.0717	179.881	ENST00000583236.1	17	+	30200944	30213685	12741	2	ENSG00000263990.1	Antisense	ENSEMBL
p33771	0.0458334	0.135915	0.756121	412.878	574.057	649.638	459.914	350.063	427.47	uc001xfj.1	14	+	61447943	61519703	71760	18	SLC38A6	Antisense	UCSC
p2242	0.00370361	1.91474e-09	0.756237	207.803	270.269	277.655	90.7258	248.854	231.929	ENST00000534431.1	11	-	33686765	33718247	31482	4	ENSG00000255202.1	Antisense	ENSEMBL
p15125	0.233728	0.00017478	0.756266	164.529	93.9613	40.0324	72.3221	4.28399	149.157	ENST00000465466.1	7	-	140395135	140396877	1742	2	ENSG00000240889.1	Antisense	ENSEMBL
p15502	0.000190456	1.98575e-10	0.756325	1394.16	1210.52	601.39	508.704	602.937	1313.19	ENST00000506718.1	7	+	142413073	142426272	13199	7	ENSG00000251060.1	Intergenic	ENSEMBL
p3985	0.000467799	1.90922e-10	0.756545	61.2318	39.6568	90.9833	7.53175	66.2017	71.4263	ENST00000417079.1	13	-	30916596	30939898	23302	5	ENSG00000238121.1	Intergenic	ENSEMBL
p9228	8.63545e-05	0.0563731	0.756771	95.3506	96.0884	148.267	161.434	34.588	61.0577	ENST00000448734.1	2	-	95690937	95692454	1517	3	ENSG00000233850.1	Antisense	ENSEMBL
p5178	4.35558e-05	3.21744e-06	0.757043	311.735	199.254	239.11	126.551	3.22897	438.078	ENST00000560587.1	15	-	57208923	57210691	1768	2	ENSG00000259484.1	Divergent	ENSEMBL
p10539	0.000159203	1.10446e-08	0.757274	612.691	535.826	243.847	420.49	85.8571	548.053	ENST00000412571.1	20	+	19738791	19789926	51135	3	ENSG00000233895.1	Intergenic	ENSEMBL
p17460	0.000543586	0.0740962	0.75827	62.5633	90.0893	89.2926	80.1286	65.7035	37.6276	TCONS_00001601	1	-	95781383	95783970	2587	3	XLOC_000927	Intergenic	HumanLincRNACatalog
p23079	1.39679e-08	0.00140265	0.758683	59.6992	79.0148	62.5725	95.9294	24.8965	31.8868	TCONS_00010136	5	+	148786475	148804999	18524	4	XLOC_004598	Intergenic	HumanLincRNACatalog
p13954	2.0632e-06	0.0150567	0.759416	80.2322	87.7727	65.1742	29.6474	67.844	79.5885	ENST00000510576.2	5	+	151056505	151067471	10966	5	ENSG00000249035.2	Antisense	ENSEMBL
p2419	0.001582	1.42947e-05	0.759577	311.976	418.206	369.471	80.1251	285.713	469.433	ENST00000529719.1	11	-	75525531	75526451	920	2	ENSG00000255507.1	Antisense	ENSEMBL
p9582	9.6268e-11	5.75568e-05	0.759772	46.2083	59.0192	76.5079	25.5168	13.815	98.7456	ENST00000596622.1	2	-	233460476	233476681	16205	4	ENSG00000237126.2	Antisense	ENSEMBL
p29687	2.00107e-06	2.58858e-08	0.75987	294.469	395.142	392.83	411.22	24.4399	386.855	TCONS_00023787	15	-	93013468	93014805	1337	2	XLOC_011583	Divergent	HumanLincRNACatalog
p6357	6.7501e-08	8.90384e-06	0.760054	287.36	217.86	363.134	67.8628	430.882	161.251	ENST00000562642.1	16	+	30959851	30967832	7981	3	ENSG00000261487.1	Antisense	ENSEMBL
p12526	0.711778	0.151029	0.7602	322.996	73.9925	313.756	11.9975	162.053	366.258	ENST00000507803.1	4	-	174243356	174250845	7489	3	ENSG00000248774.1	Antisense	ENSEMBL
p7771	0.293308	3.0636e-11	0.760614	203.315	89.5195	289.545	29.1713	196.397	217.398	ENST00000590318.1	18	-	56065894	56067314	1420	2	ENSG00000267396.1	Antisense	ENSEMBL
p7051	0.05309	1.34759e-11	0.760797	98.0778	107.968	51.7646	56.2535	47.119	92.7685	ENST00000585020.1	17	-	73679627	73680879	1252	2	ENSG00000264270.1	Intronic	ENSEMBL
p12597	0.166233	0.0617166	0.760879	3448.82	2859.89	4574.21	3987.03	733.497	3560.06	ENST00000507999.1	4	+	2936666	2942231	5565	5	ENSG00000249673.1	Antisense	ENSEMBL
p23657	0.0927291	8.37468e-05	0.760891	66.3507	10.9934	54.5446	10.8565	54.3299	35.1665	TCONS_00013804	7	-	53448225	53486571	38346	2	XLOC_006444	Intergenic	HumanLincRNACatalog
p1780	1.10078e-07	0.864662	0.761319	51.3671	20.7102	59.3897	43.8863	30.9323	25.2697	ENST00000594614.1	10	-	128798836	128824687	25851	4	ENSG00000223528.2	Antisense	ENSEMBL
p20045	0.000438907	0.00429928	0.761547	1005.81	184.412	176.528	331.523	210.686	498.64	TCONS_00024420	16	+	53412401	53423133	10732	2	XLOC_011728	Intergenic	HumanLincRNACatalog
p24647	3.64964e-15	8.64867e-11	0.761662	4207.12	3472.19	748.85	1058.71	2702.27	2658.44	TCONS_00017542	X	-	119371845	119374209	2364	2	XLOC_008225	Intergenic	HumanLincRNACatalog
p18987	0.504887	0.851259	0.761728	94.6961	172.439	87.5361	109.29	110.309	50.5639	TCONS_00021927	13	-	21138601	21141197	2596	2	XLOC_010525	Divergent	HumanLincRNACatalog
p20772	5.50883e-05	3.08026e-06	0.761925	1370.62	1191.36	244.253	424.075	563.429	1150.64	TCONS_00004128	2	-	8200516	8427679	227163	2	XLOC_001974	Intergenic	HumanLincRNACatalog
p16460	4.50122e-07	0.0276691	0.762088	84.4559	92.8744	14.2276	31.1438	30.7176	84.1226	ENST00000445051.1	9	-	20683387	20683937	550	2	ENSG00000227071.1	Intronic	ENSEMBL
p21394	5.23027e-10	8.95977e-09	0.762136	75.3604	55.8741	90.087	3.8364	45.6606	119.18	TCONS_00028639	20	-	22665305	22665950	645	2	XLOC_013686	Intergenic	HumanLincRNACatalog
p9566	3.18832e-05	0.194159	0.762232	109.39	159.567	169.058	32.7127	179.773	121.383	ENST00000414876.1	2	-	231849082	231860746	11664	6	ENSG00000238062.1	Divergent	ENSEMBL
p30197	3.84688e-10	8.71593e-16	0.762324	2667.38	1142.72	1175.01	957.039	1054.62	1788.61	uc021rzt.1	14	-	92537278	92572965	35687	11	ATXN3	Antisense	UCSC
p17551	0.0018889	9.30101e-05	0.762401	134.946	86.1647	195.734	138.497	34.6423	144.663	TCONS_00001810	1	-	212802452	212811835	9383	4	XLOC_001195	Intergenic	HumanLincRNACatalog
p19381	0.0478906	0.773969	0.762414	399.964	279.832	610.005	574.971	101.177	307.214	TCONS_00022868	14	-	99751027	99753686	2659	3	XLOC_011119	Intergenic	HumanLincRNACatalog
p21287	0.00024699	0.968408	0.762654	117.449	123.383	138.917	55.0931	104.236	130.289	TCONS_00004969	2	+	192479790	192502235	22445	3	XLOC_001787	Intergenic	HumanLincRNACatalog
p5301	3.5714e-06	0.864712	0.762805	44.278	62.9325	1.70107	26.8578	34.6097	21.6109	ENST00000440479.1	15	-	83379224	83382778	3554	2	ENSG00000228141.2	Divergent	ENSEMBL
p10090	9.63408e-11	0.00117892	0.763413	125.02	192.861	61.49	2.41876	97.632	189.566	ENST00000414885.1	2	+	165697258	165705844	8586	2	ENSG00000233255.1	Antisense	ENSEMBL
p27092	1.2319e-09	7.48934e-11	0.763716	80.2996	55.3164	96.8559	25.0363	22.399	130.107	uc.306+	10	+	103212038	103212262	224	1	uc.306+	Intronic	UCR
p7530	0.0173053	1.1958e-10	0.763824	293.478	345.082	0.462128	98.3783	86.1664	303.556	ENST00000592651.1	17	+	75543021	75544076	1055	2	ENSG00000267506.1	Intergenic	ENSEMBL
p8127	1.53847e-09	4.82701e-12	0.764898	60.9192	78.1727	84.3175	8.8305	73.2876	88.7672	ENST00000590491.1	19	-	2610152	2611860	1708	1	ENSG00000267412.1	Intronic	ENSEMBL
p19518	6.24666e-08	1.35212e-06	0.765398	50.5477	77.3994	82.3075	45.6523	94.0263	21.2498	TCONS_00023051	14	+	101360440	101364125	3685	3	XLOC_010932	Intergenic	HumanLincRNACatalog
p6247	1.24958e-07	8.8267e-09	0.765442	102.073	17.8673	184.721	74.7417	27.303	131.156	ENST00000562838.1	16	+	2318663	2323125	4462	3	ENSG00000260778.1	Divergent	ENSEMBL
p13473	2.30471e-07	1.09114e-06	0.76548	113.222	99.1419	190.55	4.19777	184.466	119.76	ENST00000520658.1	5	-	156807021	156811958	4937	3	ENSG00000248544.2	Antisense	ENSEMBL
p16653	0.000413741	0.0016852	0.765614	105.333	50.2807	87.7929	63.4505	10.5008	112.404	ENST00000588325.1	9	-	134038660	134042707	4047	3	ENSG00000236986.2	Antisense	ENSEMBL
p33752	3.90538e-07	3.58804e-05	0.765625	633.899	746.789	31.2958	162.522	561.723	356.806	uc001lda.1	10	-	118644311	118648195	3884	1	AK092331	Antisense	UCSC
p13209	0.000800827	2.94167e-06	0.765784	654.709	625.474	831.897	469.862	542.477	605.059	ENST00000504129.1	5	-	68408938	68432221	23283	6	ENSG00000248664.1	Antisense	ENSEMBL
p10702	4.38286e-05	7.60385e-16	0.765909	73.905	85.444	63.4771	38.2687	82.7202	49.6756	ENST00000441666.1	21	-	26310744	26324471	13727	2	ENSG00000230379.1	Intergenic	ENSEMBL
p3483	0.0204155	5.23629e-05	0.766105	703.648	933.398	310.937	604.795	341.889	545.675	ENST00000538731.1	12	-	132671286	132674240	2954	2	ENSG00000256576.1	Intergenic	ENSEMBL
p2122	5.45758e-05	2.69726e-08	0.766138	66.1112	96.4144	8.67694	71.2314	18.7657	41.1676	ENST00000448347.1	10	+	125115965	125277224	161259	5	ENSG00000230131.1	Intergenic	ENSEMBL
p9914	9.09941e-05	0.0241469	0.766239	138.53	147.899	164.488	164.695	10.9295	169.886	ENST00000430586.1	2	+	101439122	101463682	24560	3	ENSG00000232034.1	Intronic	ENSEMBL
p23034	0.0103584	0.0769608	0.766339	110.868	32.3111	98.9267	53.3941	15.893	116.248	TCONS_00010049	5	+	99737163	99756452	19289	4	XLOC_004490	Intergenic	HumanLincRNACatalog
p2672	0.0117538	6.68426e-05	0.766451	65.8246	19.8708	87.5737	64.645	28.1833	39.974	ENST00000528646.1	11	+	18956531	18961268	4737	2	ENSG00000255244.1	Antisense	ENSEMBL
p26069	0.674786	2.23255e-14	0.766525	672.747	999.835	107.432	583.168	117.152	664.107	uc002nry.1	19	+	28284401	28297182	12781	2	BC024732	Intergenic	UCSC
p15730	0.00769719	1.05875e-08	0.766732	64.0177	58.5151	47.4844	66.3089	27.468	36.5807	ENST00000521801.1	8	-	62213077	62213577	500	2	ENSG00000253711.1	Intronic	ENSEMBL
p29921	5.80977e-05	3.62519e-06	0.766838	114.919	199.389	195.36	64.566	183.911	142.356	TCONS_00010749	5	+	95179853	95185762	5909	2	XLOC_004478	Intergenic	HumanLincRNACatalog
p25825	5.30033e-06	0.131838	0.767074	62.2822	61.3579	58.3858	56.4735	25.0538	58.1	uc021ref.1	12	-	114943424	114943691	267	1	7SK	Intergenic	UCSC
p14015	2.0609e-08	2.46928e-07	0.767185	629.982	682.923	476.89	592.884	594.175	186.044	ENST00000523005.1	5	+	172189982	172204777	14795	2	ENSG00000253736.1	Antisense	ENSEMBL
p21979	0.000297902	3.63482e-09	0.768375	65.6285	87.8208	99.8485	92.0686	50.3772	52.1819	TCONS_00006736	3	-	191466401	191467882	1481	2	XLOC_003374	Intergenic	HumanLincRNACatalog
p11961	0.00138961	2.023e-15	0.768401	76.77	79.3688	36.9849	85.7722	9.41963	53.2046	ENST00000511998.1	3	+	129034234	129037154	2920	4	ENSG00000206417.4	Antisense	ENSEMBL
p640	1.03063e-10	0.488087	0.768455	61.6093	93.4118	85.3803	77.1144	29.1027	78.5206	ENST00000443622.1	1	-	214517514	214530958	13444	3	ENSG00000228470.1	Antisense	ENSEMBL
p15321	3.37313e-07	6.54645e-05	0.768538	75.5471	72.7804	30.7133	12.6896	27.576	97.3341	ENST00000419535.1	7	+	37037400	37053235	15835	3	ENSG00000224101.1	Antisense	ENSEMBL
p22864	7.18742e-09	0.0522513	0.768693	398.323	585.681	387.92	75.7306	436.588	542.271	TCONS_00010585	5	-	180253954	180259036	5082	3	XLOC_005110	Intergenic	HumanLincRNACatalog
p25885	0.433885	3.38167e-08	0.769034	89.7127	52.013	9.63839	31.5044	34.9219	49.9778	uc010amc.1	14	-	27791205	28142425	351220	3	BC148262	Intergenic	UCSC
p14712	2.20075e-07	0.0582667	0.769464	621.498	401.793	878.86	47.2804	413.962	1002.39	ENST00000440246.1	6	+	132411672	132420366	8694	2	ENSG00000236166.1	Intergenic	ENSEMBL
p20741	1.00864e-05	1.54147e-06	0.769584	50.6821	28.4561	81.9541	69.3931	19.126	35.4549	TCONS_00005051	2	-	292147	293374	1227	2	XLOC_001926	Intergenic	HumanLincRNACatalog
p13901	0.000126154	7.13561e-06	0.769657	89.8048	78.001	12.1243	28.3638	24.3716	85.749	ENST00000509372.1	5	+	134895266	134970564	75298	4	ENSG00000250167.1	Antisense	ENSEMBL
p18759	6.09521e-09	6.33653e-06	0.769968	73.4873	44.7535	72.0066	4.20293	80.3955	61.886	TCONS_00021458	12	-	130639192	130646561	7369	3	XLOC_010263	Divergent	HumanLincRNACatalog
p33693	2.84424e-10	1.64788e-06	0.770403	4234.06	2693.04	3047.3	175.031	4930.57	2578.69	NR_038099.1	2	-	111203459	111230652	27193	9	LIMS3L	Antisense	RefSeq
p28682	0.338964	2.07207e-09	0.770526	136.066	90.6441	160.466	119.183	80.9695	98.1764	ASO3949	None	None	None	None	#VALUE!	None	ASO3949	Antisense	RNAdb
p25976	3.77687e-11	1.84001e-13	0.77096	2693.31	2856.02	4410.16	4715.4	1390.56	1572.41	uc002czn.3	16	+	9202200	9205958	3758	1	AK057657	Intronic	UCSC
p29614	0.0513784	5.6641e-07	0.771484	100.406	150.39	124.256	186.212	39.3518	63.7824	TCONS_00019297	11	+	45743874	45746161	2287	3	XLOC_009123	Intergenic	HumanLincRNACatalog
p8262	0.0296842	4.99507e-06	0.771563	111.908	47.0467	197.58	20.1006	158.931	96.0574	ENST00000592311.1	19	-	28807611	28877085	69474	6	ENSG00000267320.1	Intergenic	ENSEMBL
p15490	3.25977e-10	1.07684e-05	0.772084	116.105	81.4111	104.69	21.6172	47.5397	164.171	ENST00000595902.1	7	+	134884310	134887108	2798	4	ENSG00000231794.3	Intronic	ENSEMBL
p12351	1.80602e-12	2.15167e-10	0.772182	5128.83	2688.79	1341.95	3712.19	448.915	2911.75	ENST00000512932.1	4	-	83815402	83821712	6310	3	ENSG00000251022.1	Divergent	ENSEMBL
p3377	1.07721e-05	6.91982e-08	0.772754	6206.99	196.075	2333.33	955.227	749.807	5046.05	ENST00000552784.1	12	-	113345432	113455556	110124	3	ENSG00000257452.1	Antisense	ENSEMBL
p25455	8.82923e-12	5.0171e-07	0.772837	3035.59	2833.35	3541.81	444.459	1067.45	5761.06	XR_108823.1	7	-	137352553	137354168	1615	1	NAG20	Intronic	RefSeq
p14770	1.96406e-06	0.115683	0.773067	325.909	76.7912	469.018	177.262	240.945	255.69	ENST00000442269.1	6	+	153304884	153310358	5474	3	ENSG00000227627.1	Antisense	ENSEMBL
p16654	0.00340293	5.5718e-07	0.773255	610.151	534.381	950.372	227.77	634.013	758.112	ENST00000592466.1	9	-	134039637	134042712	3075	3	ENSG00000236986.2	Intronic	ENSEMBL
p7345	5.89634e-05	2.74706e-06	0.773307	101.442	166.057	151.415	152.127	68.8139	103.009	ENST00000583075.1	17	+	36757301	36758954	1653	2	ENSG00000265130.1	Intronic	ENSEMBL
p6235	2.31307e-07	2.88291e-10	0.773884	92.4607	62.4116	82.2923	39.9396	51.3922	92.2061	ENST00000563162.1	16	+	1630527	1660329	29802	3	ENSG00000260989.1	Antisense	ENSEMBL
p6649	0.51459	0.00260093	0.773959	125.066	42.2533	140.911	60.461	111.243	66.8534	ENST00000438266.1	17	-	4922508	4923388	880	2	ENSG00000227495.1	Antisense	ENSEMBL
p33829	9.62771e-11	0.744369	0.774042	2571.52	1087.2	3568.39	2473.71	1230.49	1889.89	uc003vpe.3	7	-	129470571	129475681	5110	1	AL832212	Antisense	UCSC
p4665	2.40859e-10	0.000743081	0.774564	1066.66	805.076	1387.93	356.399	325.928	1842.49	ENST00000555595.1	14	-	99791135	99798352	7217	2	ENSG00000258383.1	Intergenic	ENSEMBL
p8032	1.62664e-09	6.67561e-15	0.774746	62.4445	13.8919	95.0048	46.1449	1.69587	84.9051	ENST00000589794.1	18	+	56224301	56233909	9608	2	ENSG00000267579.1	Intronic	ENSEMBL
p28309	3.26175e-10	7.19683e-10	0.774763	61.493	73.7704	3.3998	4.40132	50.7608	52.269	ASO1769	None	None	None	None	#VALUE!	None	ASO1769	Antisense	RNAdb
p3077	0.000244058	9.57028e-08	0.774789	87.2908	27.3648	53.3077	6.7548	19.0499	104.331	ENST00000535911.1	12	-	10511062	10513644	2582	2	ENSG00000256155.1	Intergenic	ENSEMBL
p2620	3.47795e-09	0.108702	0.774893	1238.53	87.9988	1340.11	131.993	189.212	1745.16	ENST00000455154.1	11	+	3210775	3211159	384	2	ENSG00000234791.1	Intergenic	ENSEMBL
p20283	3.03346e-10	1.38082e-07	0.775842	1119.66	427.728	1207.69	613.213	916.496	607.79	TCONS_00025887	17	+	29036658	29085236	48578	3	XLOC_012162	Intergenic	HumanLincRNACatalog
p3505	0.0250034	6.36909e-15	0.776059	338.196	366.317	173.021	368.113	166.123	146.782	ENST00000545357.1	12	+	4008218	4019472	11254	2	ENSG00000256862.1	Intergenic	ENSEMBL
p6587	0.000520701	5.89407e-10	0.776117	111.066	136.524	172.038	133.941	119.629	72.111	ENST00000567997.1	16	+	88751540	88753588	2048	1	ENSG00000260630.2	Antisense	ENSEMBL
p21422	4.68395e-09	4.79842e-10	0.7765	94.3021	158.59	133.347	180.5	18.2496	101.165	TCONS_00028386	20	-	38283980	38289630	5650	3	XLOC_013742	Intergenic	HumanLincRNACatalog
p33792	0.810127	0.0145474	0.776574	195.359	174.439	20.577	135.32	15.9651	151.87	uc010duu.2	19	-	6436431	6444312	7881	3	SLC25A23	Antisense	UCSC
p12161	0.00443323	0.000783076	0.776645	89.2479	72.5651	26.6595	18.5615	52.0042	75.8104	ENST00000438488.1	3	+	191286323	191291298	4975	3	ENSG00000223812.1	Intergenic	ENSEMBL
p10352	2.04377e-06	7.64076e-05	0.7767	108.872	5.86149	158.814	102.471	3.69466	106.299	ENST00000455132.1	20	-	12224542	12224944	402	2	ENSG00000235292.1	Intergenic	ENSEMBL
p23722	1.99223e-09	4.95506e-07	0.777082	47.6345	18.4759	60.0333	37.2468	19.532	41.2453	TCONS_00012861	7	-	141940556	141946886	6330	11	XLOC_006628	Intergenic	HumanLincRNACatalog
p13875	1.06182e-10	7.07903e-06	0.777202	309.241	294.779	306.218	51.2979	108.712	547.428	ENST00000564199.1	5	+	124828953	124937920	108967	4	ENSG00000260192.1	Intergenic	ENSEMBL
p21876	1.47346e-05	0.000518595	0.777376	80.2301	87.3236	72.046	34.1545	48.0861	104.019	TCONS_00006553	3	-	86954826	86959897	5071	4	XLOC_003177	Intergenic	HumanLincRNACatalog
p25951	6.35098e-08	4.39e-08	0.777565	3753.23	2022.4	1273.38	1218.16	1029.25	3233.65	uc001zue.3	15	+	45021218	45025046	3828	2	TRIM69	Intergenic	UCSC
p24147	1.11307e-05	0.00021479	0.778528	64.7224	45.6657	70.0519	32.1302	44.9597	63.3876	TCONS_00014692	8	+	49533440	49536427	2987	2	XLOC_006790	Intergenic	HumanLincRNACatalog
p22916	0.000392242	7.97179e-06	0.779509	50.4575	61.5376	42.5739	58.1518	34.3205	28.0157	TCONS_00009872	5	+	9854501	9857700	3199	2	XLOC_004290	Intergenic	HumanLincRNACatalog
p14179	0.122423	6.22008e-06	0.779616	295.818	248.626	322.688	311.546	92.2627	272.221	ENST00000500590.1	6	-	43181538	43191598	10060	2	ENSG00000245261.1	Antisense	ENSEMBL
p10265	2.10464e-07	9.41039e-10	0.779684	102.035	104.947	149.58	148.959	29.3424	99.7041	ENST00000597192.1	2	+	220423804	220424348	544	1	ENSG00000269068.1	Antisense	ENSEMBL
p10608	2.11155e-10	3.26737e-08	0.780463	98.5092	132.467	196.632	21.7021	188.632	123.398	ENST00000424566.1	20	+	49615906	49626556	10650	3	ENSG00000232358.1	Antisense	ENSEMBL
p18588	0.908541	0.000499873	0.780836	669.059	564.132	496.208	488.215	157.369	704.792	TCONS_00020204	12	-	10089184	10096037	6853	5	XLOC_010013	Intergenic	HumanLincRNACatalog
p24687	0.104835	4.51802e-12	0.781144	95.7916	174.99	41.2585	1.0539	197.192	45.5029	TCONS_00016932	X	+	45364632	45386484	21852	4	XLOC_007966	Intergenic	HumanLincRNACatalog
p20538	2.51645e-07	0.135361	0.781185	93.2176	18.6138	79.7829	50.8758	5.6851	93.1253	TCONS_00026332	18	+	51105995	51108994	2999	2	XLOC_012679	Intergenic	HumanLincRNACatalog
p18311	0.00047012	7.48642e-07	0.781237	104.569	186.978	112.604	120.771	99.4773	95.4888	TCONS_00019643	11	-	58901131	58903557	2426	2	XLOC_009445	Intergenic	HumanLincRNACatalog
p21754	2.3766e-05	1.30932e-05	0.7823	220.078	252.385	220.251	130.181	154.056	257.673	TCONS_00029930	22	-	46438756	46440349	1593	3	XLOC_014404	Intergenic	HumanLincRNACatalog
p20218	2.59165e-08	0.000259397	0.782528	86.1232	91.0283	64.7677	49.0623	31.0155	109.231	TCONS_00026155	17	-	70417080	70588928	171848	4	XLOC_012568	Intergenic	HumanLincRNACatalog
p30333	1.06736e-05	4.94665e-09	0.782619	10023.3	502.429	4185.33	1893.23	2192.82	7427.1	uc001rpo.1	12	-	47599681	47601754	2073	1	AX747844	Intronic	UCSC
p9651	0.00772281	0.185952	0.783357	100.119	162.735	128.754	71.1375	131.882	103.749	ENST00000495580.1	2	+	9243568	9244710	1142	3	ENSG00000242136.1	Intergenic	ENSEMBL
p33471	0.492822	1.83119e-12	0.783426	200.806	230.363	37.718	154.816	94.9735	117.549	ENST00000590144.1	17	+	33515540	33518362	2822	2	ENSG00000266981.1	Antisense	ENSEMBL
p8571	0.000488344	3.62081e-07	0.783831	19333.4	77645.5	65150.1	87501.5	19992.4	19587.7	ENST00000592400.1	19	+	12991782	12994902	3120	2	ENSG00000267735.1	Antisense	ENSEMBL
p2586	1.32499e-05	0.00736336	0.783846	202.832	139.241	279.921	76.5428	180.223	230.781	ENST00000419440.1	11	-	131747573	131767002	19429	2	ENSG00000238117.1	Intronic	ENSEMBL
p2194	7.13706e-08	0.0129362	0.784046	85.8639	59.8432	56.938	2.0706	90.5302	66.2824	ENST00000454086.2	11	-	12942732	12944472	1740	2	ENSG00000203258.3	Intronic	ENSEMBL
p15158	0.000188427	4.41942e-07	0.78424	618.277	827.016	819.26	56.4794	982.683	736.79	ENST00000464939.1	7	-	149567386	149577699	10313	3	ENSG00000204934.6	Antisense	ENSEMBL
p16029	6.11359e-05	0.000117463	0.784805	166.923	127.998	183.488	61.5936	85.7703	228.094	ENST00000434078.2	8	+	11973290	12008698	35408	6	ENSG00000255052.3	Antisense	ENSEMBL
p2629	0.0173229	0.000405961	0.78527	59.5904	37.5733	86.5701	41.6695	65.7424	36.8688	ENST00000528915.1	11	+	5959980	5966214	6234	3	ENSG00000255257.1	Intergenic	ENSEMBL
p19967	5.46112e-06	1.07356e-09	0.785321	59.842	29.0938	12.5555	35.4701	4.07702	40.1561	TCONS_00024768	16	-	86508050	86532172	24122	4	XLOC_012046	Intergenic	HumanLincRNACatalog
p3999	0.0432719	2.00767e-05	0.78536	163.842	124.605	139.363	120.095	23.1129	192.776	ENST00000589840.1	13	-	31504982	31506390	1408	3	ENSG00000224743.2	Divergent	ENSEMBL
p6092	0.106868	6.81036e-10	0.78564	324.234	247.383	362.618	310.711	178.155	245.107	ENST00000570278.1	16	-	70367685	70380650	12965	3	ENSG00000261777.1	Antisense	ENSEMBL
p4631	9.62292e-11	8.30485e-08	0.786121	5118.55	697.84	1291.18	507.585	3172.31	1907.51	ENST00000554433.1	14	-	88477130	88481955	4825	3	ENSG00000258407.1	Antisense	ENSEMBL
p2334	1.57347e-10	5.06123e-06	0.786213	3868.79	3626.41	4870.85	3575.65	4071.93	2074.77	ENST00000545920.1	11	-	62620543	62621814	1271	3	ENSG00000255717.1	Intergenic	ENSEMBL
p24153	0.0841728	1.08139e-09	0.787022	86.2991	14.191	98.9432	27.7219	61.4549	67.7816	TCONS_00014718	8	+	58375465	58405506	30041	2	XLOC_006808	Intergenic	HumanLincRNACatalog
p9825	0.000113693	0.933916	0.787687	58.1087	42.563	20.9352	37.7927	31.6896	26.3058	ENST00000449673.1	2	+	66554492	66556116	1624	3	ENSG00000225815.2	Intergenic	ENSEMBL
p18789	1.87476e-08	5.26362e-07	0.787798	42.7254	57.3665	30.4048	18.6579	58.3001	25.8471	TCONS_00021052	12	+	9502421	9504480	2059	2	XLOC_009651	Intergenic	HumanLincRNACatalog
p29186	0.00767102	8.87205e-12	0.787893	6449.05	423.909	4291.75	2216.85	479.357	6100.38	ENST00000584923.1	17	+	19091328	19092027	699	1	ENSG00000263934.1	Intergenic	ENSEMBL
p23833	0.00148714	0.000105836	0.788229	206.035	174.89	125.815	136.913	38.0379	224.476	TCONS_00013559	7	+	106593672	106635509	41837	2	XLOC_006201	Intergenic	HumanLincRNACatalog
p22734	4.49236e-10	2.14078e-08	0.788266	39.5523	50.4061	46.4639	60.3025	24.4769	22.7576	TCONS_00009284	5	-	65500951	65505274	4323	2	XLOC_004849	Intergenic	HumanLincRNACatalog
p19905	0.000655633	3.14803e-05	0.788314	77.5767	86.3473	22.2461	68.7167	18.0275	60.0163	TCONS_00024693	16	-	60852522	60855071	2549	2	XLOC_011973	Intergenic	HumanLincRNACatalog
p4858	0.0777334	2.16842e-05	0.788614	329.242	119.723	429.473	55.103	245.327	392.318	ENST00000557723.1	14	+	66578348	66592565	14217	4	ENSG00000258502.1	Intergenic	ENSEMBL
p19569	7.50601e-05	4.57952e-11	0.789226	125.853	172.629	166.519	89.2394	138.158	139.593	TCONS_00023640	15	-	40609594	40615570	5976	2	XLOC_011441	Intergenic	HumanLincRNACatalog
p20887	0.335938	0.00433824	0.789504	210.812	250.205	146.737	129.39	154.683	195.752	TCONS_00004347	2	-	99384248	99388552	4304	4	XLOC_002221	Intergenic	HumanLincRNACatalog
p24407	4.29374e-08	4.83013e-11	0.789646	109.022	171.233	97.2016	175.655	3.64092	118.762	TCONS_00015916	9	+	7304599	7343465	38866	3	XLOC_007278	Intergenic	HumanLincRNACatalog
p11361	0.00351365	4.91098e-06	0.790041	983.351	144.802	569.007	133.322	99.4856	1108.02	ENST00000416124.1	3	-	44462618	44465499	2881	2	ENSG00000225873.1	Intergenic	ENSEMBL
p27291	1.18241e-06	6.08096e-07	0.79025	3006.81	3792.28	692.136	881.103	2766.44	2272.4	uc.418+	17	+	56082227	56082444	217	1	uc.418+	Antisense	UCR
p23887	0.839419	2.11874e-05	0.790361	74.8595	16.5427	23.0152	6.03191	41.2614	43.1377	TCONS_00014236	7	+	155058856	155059506	650	2	XLOC_006304	Intergenic	HumanLincRNACatalog
p26849	3.66549e-06	7.67003e-07	0.790536	340.093	400.602	324.378	120.58	309.176	412.223	HIT000062002	5	+	9196819	9197025	206	1	HIX0032183	Intronic	H-InvDB
p14482	8.46047e-06	0.212469	0.790648	1293.57	879.655	1036.8	578.627	943.176	1016.19	ENST00000446001.1	6	+	13486525	13487084	559	2	ENSG00000237786.1	Antisense	ENSEMBL
p28909	5.38908e-06	1.17809e-14	0.790648	316.343	197.308	440.877	110.411	174.51	469.774	Beta-globinTranscripts|AY195961.1	None	None	None	None	#VALUE!	None	Beta-globinTranscripts|AY195961.1	Intergenic	lncRNAdb
p28048	0.107114	0.000202261	0.790709	403.206	761.963	693.485	532.19	385.701	551.763	nc-HOXC12-105	12	+	52634732	52634921	189	1	nc-HOXC12-105	Intronic	HOX Loci
p24934	0.00101595	2.89159e-06	0.790862	101.453	120.933	173.785	88.3211	105.721	119.275	NR_038256.1	12	+	127221552	127230802	9250	4	LOC100507206	Intergenic	RefSeq
p33788	9.62219e-11	0.279285	0.790965	3702.19	2596.75	3344.09	2374.54	3370.98	1881.79	uc021tnw.1	17	-	3907742	3910449	2707	1	DKFZp761G0818	Antisense	UCSC
p18166	9.62302e-11	7.37277e-09	0.790989	108.066	128.19	169.007	81.5334	71.208	167.817	TCONS_00018246	10	+	77185871	77190266	4395	2	XLOC_008522	Intergenic	HumanLincRNACatalog
p30320	9.62689e-11	5.00914e-05	0.791166	2697.07	4065.55	4252.16	2737.18	4523.91	1453.43	LIT3492	None	None	None	None	#VALUE!	None	LIT3492	Antisense	RNAdb
p18910	1.37205e-10	2.32903e-07	0.791305	297.444	497.443	131.758	15.2438	239.619	478.396	TCONS_00020538	12	+	102349394	102356105	6711	2	XLOC_009852	Intergenic	HumanLincRNACatalog
p17028	2.08425e-05	2.55364e-12	0.791509	61.8759	36.4415	84.3887	65.3806	29.2547	49.9781	ENST00000403371.2	X	-	69368431	69369504	1073	2	ENSG00000220925.2	Antisense	ENSEMBL
p12126	0.000439591	0.0839012	0.792119	84.3723	49.426	15.567	8.88501	39.5098	69.9203	ENST00000477928.1	3	+	181417280	181457867	40587	2	ENSG00000242808.2	Antisense	ENSEMBL
p11074	0.773652	3.2402e-10	0.792508	1070.04	1212.86	1222.51	1144.04	223.514	1410.5	ENST00000415121.1	22	+	17130819	17134695	3876	3	ENSG00000100181.16	Intergenic	ENSEMBL
p24811	0.0127951	3.58549e-05	0.793031	2601.99	777.164	1925.78	849.87	534.174	2822.94	NR_047648.1	1	+	161551128	161571010	19882	7	FCGR2C	Antisense	RefSeq
p5318	0.054475	0.161784	0.793125	85.0177	90.46	18.3507	48.1517	49.5434	56.0352	ENST00000566878.1	15	-	86840098	86860194	20096	4	ENSG00000260125.1	Intronic	ENSEMBL
p8924	1.35901e-07	0.123278	0.793905	203.415	210.927	279.11	140.366	150.373	259.796	ENST00000439547.1	2	-	3579573	3581372	1799	3	ENSG00000242282.2	Intergenic	ENSEMBL
p7169	3.04406e-06	1.4235e-15	0.794078	61.6387	68.6844	23.4339	61.5203	28.3329	32.242	ENST00000584139.1	17	+	10584050	10587305	3255	2	ENSG00000263388.1	Antisense	ENSEMBL
p26074	1.10746e-11	5.65031e-15	0.795059	1004.25	1356.17	874.498	257.346	483.563	1831.04	uc002oez.2	19	+	37341777	37403930	62153	4	ZNF345	Antisense	UCSC
p11770	1.23258e-09	0.205532	0.795082	73.3201	55.5142	62.5241	61.9621	12.9787	77.2048	ENST00000458127.1	3	+	31745597	31746462	865	2	ENSG00000232490.2	Intronic	ENSEMBL
p14651	0.265937	0.141775	0.795443	116.279	9.0807	196.96	181.902	1.0767	73.4089	ENST00000423747.1	6	+	109809108	109830496	21388	4	ENSG00000223537.1	Antisense	ENSEMBL
p17023	0.256636	2.8675e-09	0.795989	94.6508	96.2886	161.81	80.1739	171.438	29.1731	ENST00000418049.1	X	-	53459669	53459979	310	2	ENSG00000233250.1	Intronic	ENSEMBL
p23609	0.0212236	7.00616e-12	0.796344	107.294	129.634	31.0843	44.0437	72.4399	96.9465	TCONS_00013677	7	-	3179827	3197975	18148	2	XLOC_006339	Intergenic	HumanLincRNACatalog
p26840	0.518273	6.01173e-06	0.796488	61.6589	76.281	32.0377	80.4232	26.8235	28.1384	HIT000066133	5	-	72306170	72306703	533	1	HIX0032242	Intronic	H-InvDB
p12240	5.9277e-07	0.7365	0.797263	201.5	262.846	241.171	236.552	20.0965	305.834	ENST00000557144.1	4	-	8860440	8862553	2113	2	ENSG00000258507.1	Intergenic	ENSEMBL
p19499	0.0915258	0.82542	0.797888	88.2307	54.2508	63.2358	13.2343	59.9459	90.959	TCONS_00022588	14	+	88545538	88551072	5534	2	XLOC_010897	Intergenic	HumanLincRNACatalog
p4758	0.368303	5.8987e-05	0.797904	200.208	236.165	160.317	229.883	129.98	116.238	ENST00000557736.1	14	+	25064928	25103698	38770	3	ENSG00000258657.1	Antisense	ENSEMBL
p1872	2.77373e-06	9.64602e-09	0.798136	43.1239	41.6436	15.4415	8.22492	50.904	20.8515	ENST00000439097.1	10	+	21462942	21463977	1035	2	ENSG00000231920.1	Antisense	ENSEMBL
p23445	7.18829e-05	1.21073e-08	0.798892	102.41	194.264	132.008	118.591	116.508	107.372	TCONS_00011815	6	+	42420212	42423732	3520	2	XLOC_005289	Divergent	HumanLincRNACatalog
p12871	0.000284176	0.263898	0.798935	66.1464	74.8335	96.5127	93.1849	55.2531	41.3031	ENST00000509834.2	4	+	129214087	129396151	182064	5	ENSG00000251432.2	Intergenic	ENSEMBL
p9645	0.350009	3.17203e-09	0.799202	74.1029	80.0479	68.5962	98.6102	61.4427	17.967	ENST00000419713.1	2	+	7561401	7590385	28984	6	ENSG00000229727.2	Intergenic	ENSEMBL
p14864	0.838821	0.652295	0.799339	2971.02	4429.95	4699.17	2881.8	2660.3	4130.01	ENST00000451368.1	7	-	26411763	26415892	4129	2	ENSG00000225792.1	Antisense	ENSEMBL
p25210	0.163707	3.95302e-07	0.799737	311.732	309.49	439.142	221.847	158.398	467.768	NR_026548.1	21	+	45937097	45938860	1763	2	C21orf90	Intronic	RefSeq
p28872	3.47348e-05	6.3024e-07	0.799884	668.764	316.15	484.545	306.602	426.092	442.702	LIT3570	None	None	None	None	#VALUE!	None	LIT3570	Antisense	RNAdb
p17842	0.00356698	0.00867701	0.800415	58.4206	92.0522	73.3663	44.3535	85.6524	49.1584	TCONS_00001268	1	+	212733388	212734736	1348	2	XLOC_000555	Intergenic	HumanLincRNACatalog
p29004	3.68392e-06	2.05016e-12	0.800799	406.136	540.254	777.927	477.381	162.374	741.077	ENST00000447424.1	10	-	88998423	89096631	98208	6	ENSG00000223482.2	Intergenic	ENSEMBL
p13380	9.72482e-11	0.135811	0.800905	1271.65	155.838	1201.38	159.52	69.3489	1876.6	ENST00000512779.1	5	-	125794478	125803323	8845	2	ENSG00000250602.1	Antisense	ENSEMBL
p15845	8.57841e-05	1.65816e-10	0.801005	109.141	155.388	45.0896	35.5113	73.2375	139.257	ENST00000602571.1	8	-	97152799	97153172	373	1	ENSG00000270131.1	Intergenic	ENSEMBL
p28997	0.000209062	0.00258907	0.801032	112.342	154.058	36.0678	75.0571	75.7291	91.4999	ENST00000355358.1	10	-	8092412	8095447	3035	2	ENSG00000197308.4	Intergenic	ENSEMBL
p23614	6.63414e-05	0.649896	0.801057	96.8744	157.556	77.2507	67.9913	106.821	90.8839	TCONS_00013689	7	-	7589539	7606235	16696	5	XLOC_006350	Divergent	HumanLincRNACatalog
p7425	2.76649e-05	4.30197e-15	0.801964	89.656	51.2533	53.6391	82.122	0.304972	73.5938	ENST00000514358.1	17	+	48944508	48987098	42590	5	ENSG00000229980.4	Antisense	ENSEMBL
p3582	3.00816e-05	3.75871e-08	0.802127	88.6277	82.6072	75.8255	39.8378	74.415	83.9211	ENST00000542689.1	12	+	15154766	15159617	4851	4	ENSG00000255727.1	Intergenic	ENSEMBL
p4004	9.62403e-11	6.14468e-06	0.802821	49.704	52.1403	96.7296	98.0194	17.3629	44.0371	ENST00000433788.1	13	-	31547425	31551760	4335	3	ENSG00000238185.1	Antisense	ENSEMBL
p10705	4.70296e-09	1.20421e-14	0.802848	49.2858	52.1403	96.7296	98.0194	17.3629	43.7065	ENST00000440205.1	21	-	26768505	26797021	28516	3	ENSG00000185433.4	Intergenic	ENSEMBL
p11599	8.79125e-08	0.0388942	0.802861	74.8335	97.5491	16.08	76.5569	25.5482	49.2042	ENST00000487580.1	3	-	169657140	169684028	26888	2	ENSG00000239219.2	Divergent	ENSEMBL
p16882	4.69302e-05	0.22961	0.803085	1209.92	922.952	1380.09	565.626	649.428	1606.16	ENST00000411451.1	9	+	109427030	109464943	37913	4	ENSG00000234229.2	Intergenic	ENSEMBL
p10042	0.000121882	5.86714e-11	0.803266	137.495	95.5883	197.204	110.392	196.386	38.8568	ENST00000595449.1	2	+	145278172	145279044	872	2	ENSG00000238057.3	Divergent	ENSEMBL
p20878	1.10077e-09	5.3999e-13	0.80335	63.4684	91.7666	69.2714	13.1734	95.4941	71.6896	TCONS_00004324	2	-	85958822	85967668	8846	2	XLOC_002191	Intergenic	HumanLincRNACatalog
p10658	4.99825e-08	1.27007e-16	0.803502	282.046	317.397	402.046	307.804	63.8743	433.02	ENST00000435912.1	20	+	62439428	62447874	8446	3	ENSG00000231208.4	Intergenic	ENSEMBL
p1819	0.0824964	5.08145e-05	0.804256	59.3824	78.8979	30.5933	12.2988	92.6487	30.8702	ENST00000421077.1	10	+	2208525	2211654	3129	2	ENSG00000227912.1	Intergenic	ENSEMBL
p29809	1.69171e-10	3.29315e-06	0.804286	75.242	56.5913	80.151	54.4985	25.248	90.7495	TCONS_00003616	2	+	27938797	27978571	39774	5	XLOC_001406	Intergenic	HumanLincRNACatalog
p3339	3.05438e-09	0.000199934	0.804417	48.792	78.7238	38.6468	56.8362	34.0549	42.7729	ENST00000548740.1	12	-	96816103	96879220	63117	4	ENSG00000258272.1	Intergenic	ENSEMBL
p17217	0.903767	7.28936e-12	0.80481	659.288	587.234	111.294	165.411	113.326	814.047	ENST00000435966.1	X	+	102024145	102082072	57927	4	ENSG00000223546.2	Intergenic	ENSEMBL
p5359	4.13369e-10	4.7212e-07	0.804962	170.813	171.474	158.489	6.95554	104.331	291.819	ENST00000554261.1	15	-	94442491	94443566	1075	2	ENSG00000258754.2	Intergenic	ENSEMBL
p11941	0.0012592	2.52836e-05	0.805129	217.375	212.989	86.7081	55.9529	113.794	246.563	ENST00000485898.1	3	+	119814476	119817634	3158	2	ENSG00000242622.1	Intergenic	ENSEMBL
p28235	4.41795e-06	9.86083e-12	0.806262	729.668	586.632	366.492	470.097	265.678	620.997	ASO3443	None	None	None	None	#VALUE!	None	ASO3443	Divergent	RNAdb
p10210	6.94374e-08	9.27415e-11	0.806686	281.559	452.174	175.152	235.125	346.827	151.233	ENST00000568571.1	2	+	201689395	201692061	2666	1	ENSG00000260006.1	Divergent	ENSEMBL
p8882	1.57918e-14	3.12115e-05	0.8069	296.465	90.0749	449.379	48.0882	78.7516	547.663	ENST00000595301.1	19	+	58778000	58779051	1051	2	ENSG00000268201.1	Intergenic	ENSEMBL
p30315	0.0593993	4.61863e-05	0.807173	1376.99	1203.16	1251.03	1035.67	334.297	1722.45	LIT2012	None	None	None	None	#VALUE!	None	LIT2012	Intergenic	RNAdb
p10582	2.24455e-08	3.63648e-12	0.808426	103.527	154.384	75.5866	1.54597	93.6187	174.444	ENST00000457704.1	20	+	41314122	41316285	2163	4	ENSG00000229042.1	Intronic	ENSEMBL
p12801	1.23408e-06	0.000468205	0.809009	104.655	65.5581	108.768	2.45943	90.2021	133.037	ENST00000517407.1	4	+	98041851	98056210	14359	2	ENSG00000253170.1	Intergenic	ENSEMBL
p26855	0.000370519	0.86742	0.809083	203.686	143.657	291.813	152.135	107.11	257.885	HIT000218007	5	+	10168894	10169118	224	1	HIX0032690	Intergenic	H-InvDB
p3809	0.0783521	1.32827e-11	0.809469	1421.37	972.805	1470.32	915.634	226.888	1985.67	ENST00000504409.3	12	+	92860226	92885867	25641	2	ENSG00000205056.8	Intergenic	ENSEMBL
p8402	0.00177529	1.78998e-15	0.809895	83.4412	70.454	83.4095	30.2294	68.8196	93.1428	ENST00000416432.1	19	-	49414186	49422148	7962	2	ENSG00000235191.1	Antisense	ENSEMBL
p12772	0.0157667	0.0352505	0.810271	320.777	52.3208	381.846	99.3922	362.883	149.434	ENST00000510667.1	4	+	79892901	80229626	336725	4	ENSG00000249307.1	Intergenic	ENSEMBL
p27788	0.000622588	0.599213	0.81038	86.3071	71.9811	70.0447	84.2467	33.6228	67.167	uc.249+	9	+	8095727	8095987	260	1	uc.249+	Intergenic	UCR
p9664	0.00151214	6.75019e-05	0.810418	303.599	198.414	135.142	58.3282	133.709	324.324	ENST00000414538.1	2	+	10729291	10744956	15665	4	ENSG00000234818.1	Antisense	ENSEMBL
p20059	0.00330595	0.00576372	0.810674	209.967	69.815	199.339	4.47828	257.814	126.119	TCONS_00024434	16	+	63880951	63881349	398	2	XLOC_011751	Intergenic	HumanLincRNACatalog
p5094	7.30145e-05	1.1657e-06	0.81158	73.7218	33.6149	58.9088	26.505	44.7026	63.7139	ENST00000565366.1	15	-	36933386	36961298	27912	3	ENSG00000261191.1	Antisense	ENSEMBL
p9894	0.00149087	0.0516031	0.812197	342.934	135.617	350.504	145.265	159.387	368.704	ENST00000596529.1	2	+	98286255	98305456	19201	6	ENSG00000228486.3	Intergenic	ENSEMBL
p29835	0.000173539	1.08922e-08	0.812249	4874.63	1235.91	220.957	264.83	706.883	4171.04	TCONS_00028547	20	+	43808662	43819539	10877	4	XLOC_013531	Intergenic	HumanLincRNACatalog
p24161	4.51999e-05	0.0103227	0.812508	61.1399	42.7194	46.1006	5.62296	85.5224	30.6982	TCONS_00014734	8	+	63924579	63925933	1354	2	XLOC_006819	Intergenic	HumanLincRNACatalog
p8534	3.76522e-08	9.60933e-13	0.812738	85.567	52.1615	82.7647	14.9989	57.4554	106.749	ENST00000588192.1	19	+	6259167	6259810	643	2	ENSG00000267563.1	Intronic	ENSEMBL
p7203	0.258998	2.18568e-11	0.813298	2539.46	3545.71	1811.88	2348.86	1316.23	2757.56	ENST00000480811.1	17	+	16342640	16345146	2506	4	ENSG00000175061.11	Divergent	ENSEMBL
p3905	6.18643e-09	0.0150743	0.8134	42.8816	42.9745	62.2796	59.1377	43.3341	18.0219	ENST00000543970.1	12	+	124997767	124999359	1592	2	ENSG00000214650.2	Intronic	ENSEMBL
p28651	1.13869e-10	6.7593e-14	0.81348	2830.13	1901.88	1647	3137.15	932.288	1119.75	ASO3914	None	None	None	None	#VALUE!	None	ASO3914	Intergenic	RNAdb
p14136	3.36324e-07	0.000300673	0.813793	12614.7	1199.35	2927.31	1586.85	162.491	11874.6	ENST00000399247.2	6	-	29694377	29716826	22449	6	ENSG00000214922.3	Antisense	ENSEMBL
p283	0.0641931	4.82504e-10	0.814076	2975.57	1995.57	4726.4	1006.18	3213.03	3675.34	ENST00000452347.1	1	-	93804251	93811405	7154	5	ENSG00000223745.2	Divergent	ENSEMBL
p29211	0.000124561	0.78222	0.814132	691.853	394.51	812.561	12.7242	608.943	924.309	ENST00000587587.1	19	-	3141573	3155173	13600	4	ENSG00000267551.2	Antisense	ENSEMBL
p22714	4.17887e-07	4.76086e-07	0.814726	325.373	266.873	433.208	204.257	131.109	500.098	TCONS_00010334	5	-	53955987	53999188	43201	3	XLOC_004822	Intergenic	HumanLincRNACatalog
p28982	8.92225e-06	8.47231e-05	0.814757	412.784	406.712	391.161	130.931	162.972	692.488	ENST00000421330.1	1	+	143348739	143351483	2744	3	ENSG00000242569.1	Intergenic	ENSEMBL
p5749	0.0243316	5.51104e-09	0.814942	82.5041	1.5249	57.6431	15.7707	42.7278	56.9561	ENST00000560391.1	15	+	95143242	95144050	808	2	ENSG00000259331.1	Intergenic	ENSEMBL
p21904	0.000989655	3.42799e-09	0.815034	1013.21	984.508	1458.58	565.523	1472.72	778.76	TCONS_00006598	3	-	107560789	107597182	36393	10	XLOC_003208	Intergenic	HumanLincRNACatalog
p8575	1.08175e-10	1.01521e-09	0.815252	654.469	556.716	727.029	178.277	259.682	1142.17	ENST00000588387.1	19	+	14247990	14282076	34086	3	ENSG00000267169.1	Antisense	ENSEMBL
p22396	0.488472	0.343839	0.815471	104.997	140.011	51.7277	21.3965	181.058	39.5254	TCONS_00009185	4	-	184270285	184271991	1706	2	XLOC_004198	Intergenic	HumanLincRNACatalog
p33434	2.57873e-14	6.49926e-07	0.815571	3503.36	2759.97	3751.23	4540.51	1450.9	2176.18	ENST00000602805.1	16	-	18581769	18582390	621	1	ENSG00000260550.2	Intergenic	ENSEMBL
p2218	0.00199041	1.49003e-10	0.816215	60.284	85.7775	63.4377	75.8111	65.0118	30.1733	ENST00000530569.1	11	-	22339297	22359770	20473	2	ENSG00000254768.1	Antisense	ENSEMBL
p25738	1.36636e-07	3.58597e-07	0.816933	111.666	97.1339	191.699	102.93	61.2155	163.035	uc001lku.1	10	-	133781186	133783869	2683	1	AK125699	Antisense	UCSC
p24793	3.85e-05	8.24777e-11	0.816955	111.146	41.283	135.859	74.0984	32.8884	128.532	XR_108368.1	1	+	19725372	19727708	2336	1	LOC644083	Intronic	RefSeq
p17700	5.78156e-05	2.84612e-14	0.81711	84.9203	94.7544	6.70044	4.59114	49.2726	98.4254	TCONS_00000968	1	+	62102823	62113990	11167	2	XLOC_000227	Intergenic	HumanLincRNACatalog
p29735	1.47815e-09	2.52794e-11	0.817277	94.1949	99.5807	169.623	132.329	20.4852	144.183	TCONS_00024904	16	+	88216426	88220350	3924	2	XLOC_011826	Intergenic	HumanLincRNACatalog
p21440	0.285728	5.12467e-09	0.817889	85.3422	62.4947	84.516	91.5291	36.0304	62.4794	TCONS_00028424	20	-	46987426	46988560	1134	2	XLOC_013775	Intergenic	HumanLincRNACatalog
p18771	0.000331307	0.0224092	0.818038	79.2834	0.296004	90.759	1.41097	77.5326	60.3997	TCONS_00020279	12	+	4320969	4322471	1502	2	XLOC_009624	Intergenic	HumanLincRNACatalog
p20103	1.10857e-12	9.16524e-13	0.818519	101.869	60.6331	87.0146	14.5279	7.60213	182.104	TCONS_00024898	16	+	86768431	86771680	3249	2	XLOC_011816	Intergenic	HumanLincRNACatalog
p8419	0.0326941	2.04096e-07	0.818685	81.4683	77.4176	3.07868	54.0763	41.5379	36.9837	ENST00000563228.1	19	-	51279397	51289374	9977	4	ENSG00000261341.1	Intergenic	ENSEMBL
p8582	0.00087148	6.74167e-14	0.819087	78.9636	73.0167	52.5542	86.8297	15.5789	65.1228	ENST00000597164.1	19	+	15490122	15492004	1882	2	ENSG00000268189.1	Antisense	ENSEMBL
p13944	0.239642	0.136545	0.819363	165.403	70.0528	89.3831	98.3162	10.7896	157.055	ENST00000512007.1	5	+	148443835	148469015	25180	2	ENSG00000250072.1	Intergenic	ENSEMBL
p10254	1.79009e-08	3.56734e-16	0.819387	85.1124	90.7012	50.8112	67.5097	25.0787	93.105	ENST00000451711.1	2	+	217732734	217733879	1145	2	ENSG00000227021.1	Intergenic	ENSEMBL
p9092	5.05975e-09	4.99274e-11	0.820133	99.8601	145.221	159.635	22.8317	118.848	190.242	ENST00000446277.1	2	-	38895829	38898563	2734	4	ENSG00000232518.1	Intronic	ENSEMBL
p24055	0.0222281	0.0160755	0.820354	59.7851	41.3042	47.9469	11.1234	77.6773	33.4617	TCONS_00015179	8	-	136683445	136685646	2201	2	XLOC_007234	Intergenic	HumanLincRNACatalog
p30054	1.43181e-10	9.95249e-09	0.820539	11793.9	2213.76	761.082	3231.32	382.292	8504.75	NR_046369.1	11	-	118251934	118289530	37596	4	LOC100131626	Antisense	RefSeq
p11159	4.98116e-09	7.43029e-10	0.820852	117.65	136.785	111.597	27.4333	129.129	143.896	ENST00000418292.1	22	+	29196691	29235021	38330	2	ENSG00000226471.2	Divergent	ENSEMBL
p24698	9.63073e-11	6.47306e-13	0.820948	7957.38	1659.74	1320.78	4174.05	2608.36	2197.04	TCONS_00017188	X	+	64295732	64333726	37994	2	XLOC_008000	Intergenic	HumanLincRNACatalog
p20171	1.83527e-07	2.96822e-07	0.821239	226.243	237.391	156.958	149.361	50.5921	309.702	TCONS_00025633	17	-	38688845	38694771	5926	3	XLOC_012471	Intergenic	HumanLincRNACatalog
p20708	3.33008e-06	2.85732e-09	0.821875	48.0778	53.7007	42.6095	13.3077	77.9768	27.3844	TCONS_00027005	19	+	36077047	36078334	1287	2	XLOC_013051	Intergenic	HumanLincRNACatalog
p17604	0.00110791	1.88617e-07	0.822501	1368.48	898.631	1269.52	952.409	345.007	1611.46	TCONS_00000799	1	+	1210338	1214764	4426	3	XLOC_000015	Intergenic	HumanLincRNACatalog
p10498	0.00674761	2.5899e-09	0.822535	73.4607	82.4134	82.7949	76.4473	85.0053	34.8609	ENST00000427132.1	20	-	61265032	61266856	1824	4	ENSG00000232121.1	Intergenic	ENSEMBL
p33881	4.26798e-08	0.00125862	0.823166	102.983	103.792	141.871	56.9673	120.312	109.715	HIT000255354	4	+	76932356	77003001	70645	4	HIX0004304	Antisense	H-InvDB
p22721	0.000252264	0.0266804	0.823271	46.791	86.3025	12.5691	28.1877	69.9256	21.8065	TCONS_00010344	5	-	55828976	55831250	2274	2	XLOC_004831	Intergenic	HumanLincRNACatalog
p21677	3.92624e-10	2.89727e-17	0.823406	41.1194	55.7473	35.5424	25.0995	45.5721	38.3549	TCONS_00029002	21	+	34224421	34261285	36864	3	XLOC_013917	Intergenic	HumanLincRNACatalog
p15229	0.188329	7.38255e-09	0.824133	58.7978	11.9667	65.4453	66.7524	29.7839	15.7187	ENST00000428967.1	7	+	11232992	11418993	186001	5	ENSG00000230333.2	Antisense	ENSEMBL
p24141	1.10357e-07	0.00193738	0.824777	167.946	43.9985	81.2874	3.69838	3.98347	234.169	TCONS_00014675	8	+	37439299	37440484	1185	2	XLOC_006774	Intergenic	HumanLincRNACatalog
p1542	4.46593e-07	9.9576e-08	0.824828	3697.14	4232.78	2357.39	2208.55	2704.1	3572.61	ENST00000528337.1	10	-	28811613	28821283	9670	3	ENSG00000254635.1	Intergenic	ENSEMBL
p1743	1.13366e-05	0.000114387	0.824935	4071.26	4331.74	4415.56	4616.78	2301.28	3656.42	ENST00000598447.1	10	-	114166031	114169248	3217	5	ENSG00000232934.2	Antisense	ENSEMBL
p6922	0.000308127	2.5647e-14	0.82497	324.594	400.838	347.148	76.6311	386.931	421.285	ENST00000502300.1	17	-	48580772	48585689	4917	2	ENSG00000249451.1	Divergent	ENSEMBL
p4473	0.0028612	1.16176e-09	0.825145	18102.8	12878.2	50062.2	4094.57	45877.6	16900.3	ENST00000555043.1	14	-	50087532	50090198	2666	2	ENSG00000258377.1	Antisense	ENSEMBL
p11223	1.69527e-10	2.96122e-12	0.825408	60.4124	64.1339	79.6539	24.3662	82.5985	61.5836	ENST00000443063.1	22	+	43434590	43448372	13782	3	ENSG00000230319.1	Antisense	ENSEMBL
p17058	1.51462e-08	5.18724e-19	0.825434	1062.07	467.268	1318.78	243.411	1347.95	759.569	ENST00000602441.1	X	-	101854584	101914640	60056	3	ENSG00000270050.1	Antisense	ENSEMBL
p12436	0.000244283	0.0571005	0.825685	58.3451	86.8284	65.4819	36.851	91.9513	45.1327	ENST00000509105.1	4	-	130669271	130692636	23365	6	ENSG00000246876.2	Intergenic	ENSEMBL
p22277	1.98684e-08	6.24178e-05	0.825944	2665.95	3960.63	3312.61	828.228	3275.19	4105.8	TCONS_00008437	4	-	12471481	12611001	139520	3	XLOC_003883	Intergenic	HumanLincRNACatalog
p7637	2.91709e-10	1.12623e-13	0.826136	81.0987	87.4991	45.8311	8.26448	79.6978	89.1853	ENST00000587889.1	18	-	12738963	12750067	11104	2	ENSG00000266961.1	Intergenic	ENSEMBL
p9975	4.83099e-07	0.0238002	0.826292	52.0139	42.6635	70.3403	70.7866	47.8921	17.674	ENST00000413179.1	2	+	118753185	118754186	1001	2	ENSG00000235066.2	Antisense	ENSEMBL
p97	0.126292	1.87241e-12	0.827073	97.0894	168.604	187.193	157.66	159.662	57.2478	ENST00000442226.1	1	-	20510734	20512979	2245	2	ENSG00000225986.1	Antisense	ENSEMBL
p33678	9.89252e-11	0.68634	0.827122	12565.8	1224.34	3351.99	4043.14	1896.74	8238.74	NR_037652.1	15	-	80191181	80216096	24915	3	ST20	Antisense	RefSeq
p11885	0.487452	0.261739	0.827146	215.246	207.662	258.064	257.668	54.1462	251.449	ENST00000466089.1	3	+	94657117	94708914	51797	5	ENSG00000239589.1	Intergenic	ENSEMBL
p24626	0.00080719	1.49757e-05	0.827346	716.26	415.58	798.499	198.307	878.893	519.859	TCONS_00017331	X	-	62729889	62780932	51043	2	XLOC_008174	Intergenic	HumanLincRNACatalog
p21515	0.117112	0.230476	0.827389	164.519	104.725	5.28307	130.99	21.9707	74.1803	TCONS_00028117	20	+	18774734	18776448	1714	2	XLOC_013473	Intergenic	HumanLincRNACatalog
p752	2.61079e-06	5.52616e-09	0.827836	126.424	87.7665	143.114	48.3322	113.391	134.066	ENST00000446347.1	1	-	247729209	247803505	74296	3	ENSG00000236817.1	Antisense	ENSEMBL
p23457	2.96263e-07	0.000729302	0.828691	310.402	314.582	350.124	375.239	15.9418	416.883	TCONS_00011838	6	+	52505255	52506083	828	2	XLOC_005322	Intergenic	HumanLincRNACatalog
p1010	0.000889568	0.000137563	0.828898	63.0702	38.6259	48.3776	6.53692	67.604	50.2548	ENST00000599146.1	1	+	71547032	71873367	326335	9	ENSG00000229956.4	Antisense	ENSEMBL
p7888	0.000229924	4.84578e-07	0.82923	299.408	252.265	366.865	393.965	16.5173	351.197	ENST00000582386.1	18	+	6557820	6558653	833	2	ENSG00000265174.1	Intronic	ENSEMBL
p33526	0.00171873	1.04387e-14	0.829665	4828.69	841.717	3564.14	1032.62	550.521	6078.44	ENST00000592107.1	22	+	17082837	17096001	13164	4	ENSG00000100181.16	Intergenic	ENSEMBL
p12100	0.00348765	0.345659	0.82986	62.1566	70.5332	36.384	32.8239	59.7605	47.7231	ENST00000441018.1	3	+	178137045	178175091	38046	2	ENSG00000223941.1	Intergenic	ENSEMBL
p3378	9.3234e-10	1.1994e-07	0.829891	1390.32	1382.4	1136.55	1260.59	15.7115	1967.97	ENST00000552525.1	12	-	113623428	113629966	6538	2	ENSG00000257286.1	Antisense	ENSEMBL
p25824	4.58672e-05	0.000143262	0.829906	92.3221	78.22	31.8866	23.3635	64.9866	79.6468	uc001ttj.1	12	-	112448229	112450989	2760	1	AX747754	Antisense	UCSC
p4107	1.63554e-06	2.42609e-09	0.829938	87.4414	58.8831	68.3378	72.905	25.7967	79.4547	ENST00000366259.2	13	-	100151980	100153306	1326	2	ENSG00000203441.2	Divergent	ENSEMBL
p14484	3.73349e-05	1.13629e-05	0.830091	112.445	193.76	92.8091	167.752	50.3525	113.114	ENST00000434947.1	6	+	14394556	14404520	9964	3	ENSG00000234540.1	Intergenic	ENSEMBL
p7776	5.81767e-06	7.48819e-07	0.830328	112.78	117.388	79.2041	87.6428	53.4062	115.831	ENST00000586383.1	18	-	56422090	56425074	2984	2	ENSG00000267501.1	Intergenic	ENSEMBL
p21528	1.13023e-05	1.38823e-09	0.830527	103.222	176.037	69.7443	191.593	7.67774	90.5864	TCONS_00028137	20	+	24003972	24011949	7977	3	XLOC_013495	Intergenic	HumanLincRNACatalog
p21890	0.0128568	0.00856192	0.830835	77.154	3.57509	94.2528	31.259	73.7366	40.3855	TCONS_00006578	3	-	106404384	106436169	31785	4	XLOC_003200	Intergenic	HumanLincRNACatalog
p8756	4.90315e-05	1.50131e-09	0.831391	400.281	183.946	538.099	20.3951	45.9227	866.773	ENST00000597199.1	19	+	42041544	42043262	1718	1	ENSG00000270164.1	Intergenic	ENSEMBL
p2185	1.75712e-10	0.00149565	0.831399	223.394	210.854	293.872	83.5699	143.533	378.255	ENST00000531111.1	11	-	9451902	9455033	3131	2	ENSG00000254397.1	Antisense	ENSEMBL
p19128	7.02221e-06	2.41343e-08	0.83151	126.826	144.528	64.3628	24.0816	123.733	131.337	TCONS_00022123	13	-	112925564	112927327	1763	2	XLOC_010732	Intergenic	HumanLincRNACatalog
p11786	3.09922e-06	6.41736e-08	0.831782	320.188	272.823	320.051	53.6386	271.264	434.565	ENST00000427258.1	3	+	44940669	44942417	1748	2	ENSG00000235845.1	Intronic	ENSEMBL
p14263	3.54455e-05	0.00105026	0.832524	94.7161	143.367	82.4083	34.4468	140.851	91.5193	ENST00000330469.4	6	-	85397068	85398465	1397	2	ENSG00000233513.1	Intergenic	ENSEMBL
p4429	1.55187e-08	1.05358e-08	0.832882	5711.98	566.664	4571.01	1566.2	3355.29	4114.99	ENST00000556355.1	14	-	35390063	35451658	61595	6	ENSG00000258704.1	Divergent	ENSEMBL
p1947	1.32229e-06	0.000293906	0.833386	64.9225	13.3591	65.2249	19.554	58.7287	41.3137	ENST00000443389.1	10	+	50329888	50359019	29131	6	ENSG00000234736.1	Antisense	ENSEMBL
p29160	0.0145981	1.74298e-08	0.833694	1054.22	713.862	1196.71	720.586	693.976	1057.17	ENST00000457283.3	16	+	30546072	30548465	2393	2	ENSG00000235560.3	Antisense	ENSEMBL
p23312	4.90519e-09	3.43401e-08	0.834228	2519.85	1666.8	3389.73	623.034	1761.93	3935.46	TCONS_00012358	6	-	166253091	166253578	487	2	XLOC_005917	Intergenic	HumanLincRNACatalog
p25430	1.85444e-06	0.000249916	0.834291	196.61	264.789	161.38	73.7227	160.233	285.623	XR_108734.1	7	-	5465586	5468950	3364	1	LOC100129484	Intergenic	RefSeq
p27248	0.000435867	9.29872e-08	0.834325	107.227	120.763	198.249	134.371	114.385	106.866	uc.391+	15	+	68040303	68040614	311	1	uc.391+	Antisense	UCR
p13852	1.26918e-09	3.26995e-06	0.83471	118.11	198.413	145.661	59.8865	145.82	180.083	ENST00000513366.1	5	+	117911269	117917019	5750	5	ENSG00000249551.1	Intergenic	ENSEMBL
p17199	1.37655e-05	9.74138e-07	0.83474	670.977	435.752	184.073	69.1288	422.663	585.692	ENST00000447323.1	X	+	64808283	64813305	5022	2	ENSG00000231669.1	Intergenic	ENSEMBL
p3064	0.487366	3.20319e-07	0.835958	306.357	290.403	463.146	307.104	201.878	377.056	ENST00000537659.1	12	-	8509558	8527109	17551	4	ENSG00000226091.3	Intergenic	ENSEMBL
p16010	7.1043e-05	1.61216e-11	0.836086	118.425	163.249	151.668	100.597	123.999	137.715	ENST00000533615.1	8	+	7812595	7848219	35624	8	ENSG00000225725.4	Antisense	ENSEMBL
p4115	0.00235308	0.000553058	0.836159	74.175	91.0781	93.3454	78.2924	87.066	50.8709	ENST00000437115.1	13	-	102945823	103019738	73915	3	ENSG00000243319.1	Intronic	ENSEMBL
p8574	0.0123716	7.36474e-09	0.836831	168.454	137.348	90.4115	139.295	19.9541	172.315	ENST00000590715.1	19	+	14229917	14230349	432	2	ENSG00000267783.1	Antisense	ENSEMBL
p26238	3.98265e-06	0.886205	0.836855	106.832	45.5131	15.9991	14.4131	17.1963	109.27	uc011biz.1	3	+	119187784	119209565	21781	10	POGLUT1	Antisense	UCSC
p9814	0.0279734	2.70462e-05	0.836947	4456.54	995.002	3277.67	2905.46	794.719	3605.71	ENST00000451350.1	2	+	64455601	64479993	24392	4	ENSG00000225889.2	Intergenic	ENSEMBL
p9876	0.000128346	5.12282e-08	0.837055	61.7614	80.0083	31.9004	71.3842	15.4296	58.5576	ENST00000439077.1	2	+	86789197	86844564	55367	3	ENSG00000228363.2	Intronic	ENSEMBL
p9917	0.382768	0.00294508	0.837883	759.093	994.238	900.722	864.877	311.461	1047.45	ENST00000450893.1	2	+	103055172	103056935	1763	3	ENSG00000234389.1	Intronic	ENSEMBL
p7141	2.34663e-05	8.38955e-06	0.837945	85.7422	40.1183	71.4693	22.6834	82.2573	60.4108	ENST00000573105.1	17	+	5016653	5018299	1646	1	ENSG00000234327.2	Intronic	ENSEMBL
p2505	0.000166011	1.17557e-10	0.838143	51.898	75.3739	9.03441	61.1806	8.2865	44.7771	ENST00000544925.1	11	-	114081337	114227293	145956	3	ENSG00000256947.1	Antisense	ENSEMBL
p18546	4.11637e-11	0.961171	0.83829	74.5312	68.0053	65.8791	35.4239	52.015	87.2738	TCONS_00020005	11	+	119776057	119784117	8060	2	XLOC_009301	Intergenic	HumanLincRNACatalog
p13749	7.44575e-07	0.111775	0.838493	62.1508	56.2155	45.9114	51.2954	42.5371	43.9131	ENST00000503349.1	5	+	86263137	86433529	170392	3	ENSG00000249061.1	Intergenic	ENSEMBL
p16096	0.0414924	0.00136027	0.838587	1399.66	1015.04	1260.67	98.3017	1108.73	1875.07	ENST00000561377.1	8	+	28910033	28911276	1243	2	ENSG00000259599.1	Antisense	ENSEMBL
p233	4.33844e-05	2.30695e-06	0.839143	60.2467	24.0462	69.0424	41.6995	60.5903	26.3803	ENST00000435739.1	1	-	65745138	65772204	27066	2	ENSG00000229294.1	Intronic	ENSEMBL
p13653	0.00310272	2.59409e-05	0.839343	63.0223	20.9772	82.617	6.73859	81.8179	51.2919	ENST00000507027.1	5	+	40052392	40053426	1034	2	ENSG00000250048.1	Intergenic	ENSEMBL
p16354	0.00106925	0.0353373	0.839349	105.704	64.308	178.861	33.6657	163.02	96.1402	ENST00000525292.1	8	+	125860978	125862459	1481	3	ENSG00000249816.2	Intergenic	ENSEMBL
p1260	6.00165e-06	3.41272e-17	0.839643	62.9846	42.1528	20.7603	28.9282	27.2314	49.5494	ENST00000451992.1	1	+	167596621	167599911	3290	2	ENSG00000241666.1	Antisense	ENSEMBL
p28409	1.49462e-05	1.23133e-14	0.840371	73.8251	72.7861	75.5942	30.4721	77.6163	78.6467	ASO3643	None	None	None	None	#VALUE!	None	ASO3643	Intronic	RNAdb
p29916	0.0117974	0.00159797	0.840695	107.022	128.55	124.135	75.0852	153.377	73.941	TCONS_00010584	5	-	180253879	180258943	5064	2	XLOC_005110	Intergenic	HumanLincRNACatalog
p12241	0.0045528	0.365323	0.840888	1014.15	997.565	1411.47	951.123	961.303	966.089	ENST00000561486.1	4	-	10069712	10074643	4931	2	ENSG00000261490.1	Intergenic	ENSEMBL
p15392	0.00407702	5.09844e-05	0.841327	19072.9	64425.7	87774.6	73035.2	47317.2	23744.4	ENST00000594469.1	7	+	87848673	87906518	57845	3	ENSG00000228113.3	Antisense	ENSEMBL
p6548	0.000350544	9.9359e-08	0.841906	65.4225	32.9753	63.8926	48.5274	58.4231	29.6827	ENST00000561562.1	16	+	83941737	83985058	43321	4	ENSG00000260300.1	Antisense	ENSEMBL
p29781	4.17938e-08	6.39362e-06	0.842376	43.4421	58.44	28.5109	36.7199	44.39	28.73	TCONS_00004165	2	-	20724749	20739937	15188	4	XLOC_002010	Intergenic	HumanLincRNACatalog
p30256	9.74721e-11	2.16854e-07	0.842693	5004.82	126.405	4943.92	1492.95	4779.3	2218.01	uc004bnb.1	9	-	125606834	125610773	3939	1	AL833455	Divergent	UCSC
p23839	0.00229821	1.19323e-05	0.842787	111.031	168.309	82.4899	74.8984	169.635	60.4115	TCONS_00014197	7	+	123175277	123175873	596	3	XLOC_006223	Divergent	HumanLincRNACatalog
p6622	2.54034e-06	2.98192e-09	0.84293	215.964	130.53	246.551	107.451	254.668	137.776	ENST00000573127.1	17	-	1615654	1619505	3851	4	ENSG00000186594.6	Divergent	ENSEMBL
p15719	4.10728e-08	0.827582	0.843834	77.7873	52.8036	18.8567	30.607	38.3757	57.1264	ENST00000531654.1	8	-	61317237	61326489	9252	4	ENSG00000251396.2	Intergenic	ENSEMBL
p14522	2.76457e-14	0.00166843	0.844014	1064.1	412.502	1032.87	703.784	755.697	658.554	ENST00000422049.1	6	+	31626105	31628498	2393	2	ENSG00000227198.1	Antisense	ENSEMBL
p20143	1.45611e-08	2.18188e-09	0.844497	222.184	180.167	224.558	174.452	80.7037	274.267	TCONS_00026046	17	-	20478826	20480255	1429	2	XLOC_012419	Intergenic	HumanLincRNACatalog
p30027	3.4432e-09	2.39903e-07	0.844739	3587.48	4915.94	10.4573	3985.45	999.147	2207.41	TCONS_00030000	HSCHR6_MHC_MANN_CTG1	+	4301448	4305045	3597	1	XLOC_014484	Intergenic	HumanLincRNACatalog
p26884	0.0289419	7.91785e-06	0.84482	4418.13	4216.33	3380.64	452.817	1448.35	8249.42	HIT000648524_02	7	-	74582696	74582938	242	1	HIX0033553	Intergenic	H-InvDB
p5398	1.0468e-05	0.0543113	0.844897	74.0346	56.2263	93.0401	34.2178	87.6249	66.8237	ENST00000559468.1	15	-	99497377	99646030	148653	4	ENSG00000259475.1	Antisense	ENSEMBL
p30243	0.875388	0.39124	0.844968	3818.9	1480.9	4139.02	290.514	3208.21	4476.78	uc011kgn.1	7	+	76610138	76673095	62957	9	DTX2P1-UPK3BP1-PMS2P11	Intergenic	UCSC
p10995	3.70282e-09	4.17571e-08	0.845282	62.7084	66.6146	41.6897	43.9472	24.4918	76.1149	ENST00000419368.1	22	-	29867929	29874059	6130	2	ENSG00000225465.5	Intergenic	ENSEMBL
p26901	2.08193e-05	0.00540738	0.845414	4520.83	3206.75	3923.58	2358.9	2493.4	4997.76	HIT000325481	7	+	151845595	151845802	207	1	HIX0167874	Antisense	H-InvDB
p33560	0.082844	1.82413e-08	0.846498	623.108	362.391	697.454	222.288	402.645	799.683	ENST00000508163.1	4	-	88238321	88266362	28041	4	ENSG00000255723.1	Antisense	ENSEMBL
p8925	4.78841e-08	1.79792e-08	0.846554	227.701	64.8278	216.092	49.4057	93.2028	287.966	ENST00000416463.1	2	-	3579578	3581733	2155	3	ENSG00000242282.2	Intergenic	ENSEMBL
p1446	3.49167e-09	3.98201e-16	0.84663	76.4142	96.7074	82.1922	47.2575	36.2696	132.629	ENST00000444330.1	1	+	241587591	241596628	9037	3	ENSG00000225554.1	Intergenic	ENSEMBL
p16141	3.16835e-08	0.616292	0.846783	83.2809	88.777	67.1295	20.7171	93.8683	87.9544	ENST00000518722.1	8	+	40227546	40259367	31821	4	ENSG00000253354.1	Intergenic	ENSEMBL
p2890	4.70979e-07	0.00594954	0.847422	96.5178	91.1119	124.859	46.8503	85.1072	132.853	ENST00000524610.1	11	+	86142631	86333909	191278	3	ENSG00000254733.1	Antisense	ENSEMBL
p11049	0.0971519	0.175322	0.847674	3742.21	811.266	2922.75	1976.95	873.57	3486.89	ENST00000432502.1	22	-	45530170	45559540	29370	2	ENSG00000226328.1	Divergent	ENSEMBL
p3110	0.235997	2.28555e-05	0.84827	339.22	338.944	102.13	241.578	71.9467	348.375	ENST00000537724.1	12	-	26488796	26489883	1087	2	ENSG00000256185.1	Antisense	ENSEMBL
p26361	0.402447	0.000612222	0.848345	126.912	74.9608	96.6984	88.9916	53.5861	110.714	uc011djk.2	6	+	21668877	22194616	525739	12	LINC00340	Intergenic	UCSC
p25401	0.000587829	0.971384	0.848365	747.007	664.229	63.0128	353.658	268.808	628.235	NR_037593.1	6	-	163834096	163834982	886	1	CAHM	Divergent	RefSeq
p8637	1.38666e-08	6.43775e-11	0.848612	300.718	307.094	166.922	28.1093	0.443658	628.896	ENST00000600671.1	19	+	23506769	23511903	5134	1	ENSG00000267934.1	Intergenic	ENSEMBL
p12012	4.26061e-10	0.273593	0.848619	60.8899	25.3232	91.5272	35.2031	63.5393	52.0914	ENST00000477153.1	3	+	147878697	147944382	65685	3	ENSG00000244650.2	Intergenic	ENSEMBL
p10219	0.175232	0.000369831	0.848705	668.875	175.737	952.639	660.828	20.3273	844.181	ENST00000453039.1	2	+	206980270	206987047	6777	2	ENSG00000231955.1	Divergent	ENSEMBL
p8176	9.62283e-11	4.49603e-12	0.84884	3979.79	2039.23	1242.67	233.386	3745.7	2184.92	ENST00000592882.1	19	-	13263909	13265007	1098	2	ENSG00000267598.1	Antisense	ENSEMBL
p18614	0.0159614	3.99927e-08	0.848903	137.734	130.322	181.23	179.45	48.1228	153.827	TCONS_00020765	12	-	45870533	45875130	4597	2	XLOC_010059	Intergenic	HumanLincRNACatalog
p6367	1.38534e-07	0.00150847	0.850001	398.1	708.712	357.237	247.385	176.393	820.665	ENST00000568972.1	16	+	32660513	32661722	1209	3	ENSG00000261569.1	Intergenic	ENSEMBL
p29511	0.00043695	0.0416766	0.85004	61.4952	40.9496	71.8717	21.5928	93.8007	32.7824	ENST00000531565.1	8	+	144778323	144780583	2260	2	ENSG00000181097.5	Divergent	ENSEMBL
p21397	0.00244629	6.60598e-11	0.850421	88.3593	70.8074	52.5616	21.301	56.5483	102.209	TCONS_00028640	20	-	23010273	23011443	1170	2	XLOC_013687	Intergenic	HumanLincRNACatalog
p5293	2.66078e-05	0.00323	0.850541	113.388	152.485	183.472	66.296	181.182	134.708	ENST00000558208.1	15	-	80846949	80855285	8336	3	ENSG00000259175.1	Antisense	ENSEMBL
p5113	2.0371e-08	3.78812e-09	0.850868	47.3832	53.9767	34.6386	43.7363	53.4077	18.5729	ENST00000558818.1	15	-	39804606	39806326	1720	3	ENSG00000259390.1	Intergenic	ENSEMBL
p1637	3.89239e-08	3.91631e-06	0.851086	718.849	460.305	732.358	984.492	128.766	513.602	ENST00000448214.2	10	-	76265889	76289096	23207	5	ENSG00000232342.2	Intronic	ENSEMBL
p11393	3.95145e-10	2.08156e-09	0.851294	733.867	643.125	620.497	443.52	878.917	378.013	ENST00000488720.1	3	-	58148273	58156363	8090	2	ENSG00000244161.1	Antisense	ENSEMBL
p8680	0.00173099	3.45055e-06	0.851303	74.1299	7.02365	98.4381	31.0584	46.2289	75.5996	ENST00000590069.1	19	+	33322200	33324074	1874	2	ENSG00000267555.1	Antisense	ENSEMBL
p7841	0.000158409	1.76599e-13	0.85165	113.247	134.743	127.554	160.344	44.1238	115.365	ENST00000580781.1	18	+	976590	1174805	198215	5	ENSG00000263551.1	Intergenic	ENSEMBL
p423	0.0367283	5.8215e-11	0.852009	113.944	166.718	193.636	191.683	126.892	85.5309	ENST00000366105.2	1	-	145492838	145493891	1053	2	ENSG00000234222.2	Intronic	ENSEMBL
p29497	0.00742056	0.000418805	0.852394	84.0216	69.4464	71.0762	75.4425	57.2494	58.7083	ENST00000304233.3	8	+	11433821	11438851	5030	3	ENSG00000170983.3	Intergenic	ENSEMBL
p19574	1.50263e-09	1.38534e-07	0.852536	65.4705	42.0363	67.9488	38.2921	38.7332	72.557	TCONS_00023667	15	-	47104361	47106170	1809	2	XLOC_011468	Intergenic	HumanLincRNACatalog
p33481	3.92229e-06	4.66888e-12	0.852746	3790.41	2837.01	3130.29	432.669	4544.45	3343.73	ENST00000473572.2	19	-	36499539	36505137	5598	7	ENSG00000248101.2	Antisense	ENSEMBL
p4692	0.159257	1.36054e-06	0.852824	103.855	180.712	22.4564	133.661	67.8706	60.3061	ENST00000560742.1	14	-	103587189	103589344	2155	2	ENSG00000259717.1	Intergenic	ENSEMBL
p19488	3.54491e-05	0.0155433	0.853185	689.056	718.019	371.888	838.991	225.496	453.297	TCONS_00022572	14	+	86378384	86537310	158926	2	XLOC_010891	Intergenic	HumanLincRNACatalog
p967	1.25132e-06	2.07254e-11	0.853248	76.8131	14.6412	81.1094	7.78341	75.4126	64.0436	ENST00000422374.1	1	+	56046709	56200675	153966	3	ENSG00000234810.1	Intergenic	ENSEMBL
p14495	9.62451e-11	0.0126177	0.854009	2956.38	2294.84	1409.8	1095.92	3144.01	1448.64	ENST00000567732.1	6	+	26527290	26527632	342	1	ENSG00000261353.1	Intergenic	ENSEMBL
p11705	3.35334e-06	0.0730396	0.85406	3479.78	4951.49	1375.95	2416.99	660.116	5298.86	ENST00000423193.1	3	+	898806	899774	968	2	ENSG00000224239.1	Intergenic	ENSEMBL
p25755	2.85304e-12	0.000578152	0.854357	59.8496	99.7946	23.0403	28.752	40.9683	86.3576	uc001jxp.3	10	+	78647801	78663848	16047	2	BC030624	Antisense	UCSC
p2977	4.80879e-11	0.000128154	0.854383	736.127	924.836	430.994	362.772	104.895	1319.67	ENST00000529229.1	11	+	119580629	119584635	4006	3	ENSG00000255247.1	Intronic	ENSEMBL
p20793	0.000166231	0.00254271	0.854459	110.99	184.584	132.994	195.306	28.293	142.594	TCONS_00004183	2	-	23957294	23958476	1182	2	XLOC_002024	Intergenic	HumanLincRNACatalog
p26468	1.38514e-05	0.000434541	0.854843	125.166	142.579	186.493	149.002	96.4744	142.826	uc022bce.1	8	-	143760854	143763384	2530	1	AX747544	Antisense	UCSC
p1883	0.00103073	0.00148539	0.854922	7247.27	1942.51	3040.08	672.752	1285.34	8497.48	ENST00000413288.1	10	+	26938260	26942040	3780	3	ENSG00000231976.3	Intergenic	ENSEMBL
p13427	0.00257911	2.08708e-09	0.854975	80.9181	79.0514	51.2327	67.9333	60.7741	51.8652	ENST00000520928.1	5	-	139484886	139486067	1181	2	ENSG00000245146.2	Intergenic	ENSEMBL
p23930	2.85378e-08	0.236013	0.855093	200.129	297.892	293.793	205.08	133.184	338.81	TCONS_00014948	8	-	21222915	21267010	44095	2	XLOC_007020	Intergenic	HumanLincRNACatalog
p11299	1.61991e-07	1.32154e-05	0.855699	114.9	113.873	15.6904	69.0476	7.34962	132.79	ENST00000424112.2	3	-	13518481	13521553	3072	2	ENSG00000244502.2	Divergent	ENSEMBL
p20689	3.82832e-07	8.97584e-08	0.855877	84.718	65.9925	54.5038	23.9325	80.6217	71.0839	TCONS_00027514	19	+	32082015	32084533	2518	2	XLOC_013037	Antisense	HumanLincRNACatalog
p12888	1.06819e-06	7.54116e-06	0.85594	3262.28	2940.41	4454.09	1903.58	1362.77	5855.21	ENST00000514526.1	4	+	135988387	136018813	30426	4	ENSG00000248434.1	Intergenic	ENSEMBL
p14727	2.20817e-11	2.27951e-07	0.856632	112.744	143.341	139.502	66.562	115.83	156.481	ENST00000421378.2	6	+	135818991	136011973	192982	4	ENSG00000231028.4	Divergent	ENSEMBL
p9497	1.1937e-06	0.0208439	0.856854	199.224	106.928	268.218	193.798	66.1378	232.215	ENST00000600062.1	2	-	200759287	200761969	2682	2	ENSG00000232732.4	Intergenic	ENSEMBL
p13242	6.69618e-08	1.52978e-11	0.857251	224.727	253.705	154.152	1.33736	148.411	392.535	ENST00000515871.1	5	-	79904441	79918343	13902	2	ENSG00000251221.1	Intergenic	ENSEMBL
p21434	0.000158833	7.73156e-15	0.85729	101.483	160.283	96.3655	130.673	116.861	59.4882	TCONS_00028418	20	-	46523115	46528274	5159	2	XLOC_013771	Intergenic	HumanLincRNACatalog
p11647	9.67208e-11	0.0299514	0.857325	57.9898	54.8361	76.7811	92.4951	7.8363	62.2235	ENST00000455926.1	3	-	186359303	186383492	24189	3	ENSG00000236524.1	Antisense	ENSEMBL
p16814	0.00113915	0.958353	0.85747	95.0946	79.3236	26.3255	70.6295	25.7445	75.7578	ENST00000591117.1	9	+	84888373	85068914	180541	5	ENSG00000228430.3	Intergenic	ENSEMBL
p7727	0.00135239	5.41493e-05	0.858089	308.69	45.0253	457.183	188.534	190.314	316.974	ENST00000589845.1	18	-	42710529	42761312	50783	4	ENSG00000267101.1	Intergenic	ENSEMBL
p16109	5.60861e-07	0.0041044	0.858146	45.9932	97.8387	16.7056	84.8707	25.7044	27.1895	ENST00000520436.1	8	+	30620662	30624068	3406	2	ENSG00000104691.10	Antisense	ENSEMBL
p27269	0.840811	1.37074e-10	0.858415	111.04	174.863	67.1658	129.282	56.6014	117.197	uc.399+	16	+	50848990	50849204	214	1	uc.399+	Intergenic	UCR
p26671	1.6887e-08	2.66007e-08	0.858489	65.1951	84.0136	25.4611	46.9158	38.1932	64.8431	HIT000066033	13	+	52495386	52495723	337	1	HIX0037376	Intergenic	H-InvDB
p19571	1.86519e-09	0.000237142	0.858624	1110	1335.43	1139.91	1466.64	749.706	862.103	TCONS_00023648	15	-	41578206	41598741	20535	2	XLOC_011448	Intergenic	HumanLincRNACatalog
p1561	0.145637	8.53489e-06	0.859246	88.7624	67.5408	90.4179	85.9114	92.0842	33.9986	ENST00000568976.1	10	-	43246625	43247593	968	1	ENSG00000259869.1	Intergenic	ENSEMBL
p3845	7.05157e-06	1.89919e-05	0.859381	58.0236	73.5355	34.7657	16.0212	94.5884	32.3269	ENST00000553177.1	12	+	111374388	111396012	21624	3	ENSG00000185847.3	Intergenic	ENSEMBL
p1181	5.19641e-06	0.822574	0.859466	85.6085	1.14994	88.59	45.3128	31.8941	73.499	ENST00000597931.1	1	+	147635155	147647162	12007	3	ENSG00000232265.2	Intronic	ENSEMBL
p22543	9.62404e-11	0.193329	0.85969	334.346	362.484	168.047	14.8643	192.059	536.603	TCONS_00008199	4	+	115379251	115412059	32808	3	XLOC_003652	Intergenic	HumanLincRNACatalog
p26019	2.3577e-07	1.38023e-09	0.859741	198.18	256.757	26.3635	32.6041	144.117	237.072	uc002gvi.1	17	+	19192082	19194013	1931	1	AX748411	Intronic	UCSC
p1958	0.0774748	5.23884e-07	0.860156	88.436	3.15524	89.0573	34.7852	53.1583	67.4424	ENST00000453639.1	10	+	57228086	57228982	896	2	ENSG00000223800.1	Intergenic	ENSEMBL
p16077	0.00215935	8.16322e-05	0.860311	3554.66	2087.03	4492.46	2554.21	1402.54	4761.77	ENST00000518308.1	8	+	23046791	23048188	1397	2	ENSG00000253930.1	Divergent	ENSEMBL
p11993	0.0157945	9.32946e-05	0.860537	117.099	181.796	49.4347	70.2617	119.697	109.792	ENST00000600150.1	3	+	142683338	142735213	51875	6	ENSG00000269192.1	Antisense	ENSEMBL
p1515	0.000889093	0.043181	0.861094	135.994	140.026	140.911	126.895	51.3359	180.786	ENST00000421657.1	10	-	12287626	12289844	2218	2	ENSG00000228302.2	Antisense	ENSEMBL
p19799	6.35917e-08	3.17638e-05	0.861112	135.403	125.612	175.207	28.1707	121.208	226.258	TCONS_00023478	15	+	79709124	79709673	549	2	XLOC_011326	Intergenic	HumanLincRNACatalog
p1126	0.00889789	7.58568e-05	0.861386	79.0163	88.8663	79.239	92.9388	63.4273	56.5009	ENST00000418238.1	1	+	114355229	114358098	2869	3	ENSG00000231128.1	Antisense	ENSEMBL
p18254	0.490667	1.02946e-10	0.861431	9770.42	1638.88	3547.98	1302.62	728.331	10853.7	TCONS_00018396	10	+	134827231	134827947	716	3	XLOC_008678	Intergenic	HumanLincRNACatalog
p26132	1.86138e-08	0.000616281	0.861452	219.751	298.227	61.2107	149.387	0.0954705	349.46	uc002vwe.1	2	+	237478467	237480261	1794	1	AK023507	Antisense	UCSC
p26087	7.7921e-05	0.160402	0.861675	66.9458	81.28	91.056	59.5598	69.1124	77.5108	uc002rxj.1	2	-	53990097	53992017	1920	1	AX747197	Intronic	UCSC
p33436	1.35463e-07	2.22885e-08	0.861703	36287.7	9135.82	68926	857.115	40235	57443.2	ENST00000530079.1	16	-	70010254	70099756	89502	25	ENSG00000196696.7	Intergenic	ENSEMBL
p24842	3.32935e-05	0.000181584	0.861944	1320.3	1411.11	1446.49	1115.28	1228.7	1257.13	XR_110454.2	10	-	106111560	106113279	1719	2	LOC100505869	Divergent	RefSeq
p21048	9.93565e-05	0.715927	0.862146	65.1478	69.5389	11.3223	54.0052	18.6562	53.2197	TCONS_00003577	2	+	11547408	11561393	13985	3	XLOC_001351	Intergenic	HumanLincRNACatalog
p8715	5.39766e-08	3.40002e-16	0.862231	1053.97	878.301	1277.3	383.916	840.995	1542.47	ENST00000587413.1	19	+	37288419	37293554	5135	3	ENSG00000267254.1	Intergenic	ENSEMBL
p6862	2.55047e-10	0.722467	0.862546	5250.89	4799.33	867.83	4934.08	967.982	3515.26	ENST00000587534.1	17	-	43315394	43319101	3707	2	ENSG00000233175.2	Antisense	ENSEMBL
p11034	0.684905	5.10581e-10	0.863028	20808.5	76543.9	97414.7	34150.6	99850.4	34088.4	ENST00000513758.2	22	-	39387563	39394214	6651	5	ENSG00000249310.2	Antisense	ENSEMBL
p11997	0.00402422	1.95441e-11	0.863231	61.0532	13.2638	84.5752	78.3678	7.69579	51.0971	ENST00000479030.1	3	+	143061087	143065913	4826	4	ENSG00000240012.1	Intronic	ENSEMBL
p15248	0.0204115	0.0140209	0.863542	288.046	409.579	269.846	366.246	164.355	304.851	ENST00000579293.1	7	+	16250166	16287714	37548	4	ENSG00000229688.3	Antisense	ENSEMBL
p6246	0.306455	1.66529e-05	0.86381	132006	176666	36299.8	31731.8	91155.2	175102	ENST00000567888.1	16	+	2318623	2323040	4417	2	ENSG00000260778.1	Divergent	ENSEMBL
p16349	3.40346e-14	0.00249805	0.863897	5199.94	131.356	225.79	1425.47	320.11	3055.16	ENST00000521258.1	8	+	124014799	124042991	28192	2	ENSG00000253607.1	Antisense	ENSEMBL
p5428	0.0135296	1.20211e-11	0.864162	198.665	119.267	235.9	168.237	90.2726	220.091	ENST00000561964.1	15	+	24480224	24520162	39938	3	ENSG00000261621.1	Intergenic	ENSEMBL
p22308	1.14856e-06	0.24782	0.864223	126.124	165.197	22.4676	109.28	11.4514	150.453	TCONS_00009065	4	-	64329175	64339851	10676	3	XLOC_003970	Intergenic	HumanLincRNACatalog
p2769	3.75882e-07	2.86598e-10	0.864985	95.716	107.79	188.74	65.7474	169.856	103.684	ENST00000534120.1	11	+	59436784	59443268	6484	2	ENSG00000255355.1	Divergent	ENSEMBL
p17994	4.49027e-09	1.89376e-07	0.865066	57.8546	82.0181	26.5855	86.4446	29.0054	28.5474	TCONS_00018589	10	-	103461753	103464357	2604	2	XLOC_008925	Intergenic	HumanLincRNACatalog
p21568	4.93241e-07	4.66685e-11	0.865346	58.2391	85.6983	87.2356	95.2066	51.6597	53.1784	TCONS_00028224	20	+	51301626	51315089	13463	2	XLOC_013567	Intergenic	HumanLincRNACatalog
p14426	0.571857	0.179465	0.865537	113.97	104.277	132.981	165.539	25.6654	112.796	ENST00000441716.2	6	-	168377261	168380456	3195	3	ENSG00000235994.4	Antisense	ENSEMBL
p29774	0.98355	6.37332e-08	0.865785	343.513	195.157	176.124	159.875	84.9409	374.042	TCONS_00027589	19	+	48824721	48825440	719	2	XLOC_013108	Intergenic	HumanLincRNACatalog
p3414	0.000121276	1.56614e-06	0.865859	749.186	569.041	329.476	489.749	30.336	906.593	ENST00000537157.1	12	-	122233475	122238913	5438	4	ENSG00000212694.4	Intergenic	ENSEMBL
p2641	0.138723	0.00167423	0.86641	3463.6	4804.79	1230.91	3861.73	898.977	3469.58	ENST00000525484.1	11	+	8986221	8997830	11609	5	ENSG00000254860.1	Divergent	ENSEMBL
p29518	0.33726	7.81747e-10	0.866464	281.039	247.818	330.299	106.85	367.323	270.254	ENST00000423380.1	9	-	93867238	93869586	2348	3	ENSG00000230537.1	Intergenic	ENSEMBL
p20008	0.0592522	7.00922e-11	0.866471	98.9574	150.951	94.085	107.831	98.2385	91.9911	TCONS_00024822	16	+	27297150	27301839	4689	2	XLOC_011681	Intergenic	HumanLincRNACatalog
p4260	1.75239e-06	0.11392	0.866698	48.1976	51.1816	68.403	59.756	58.267	27.3935	ENST00000596240.1	13	+	75126979	75129490	2511	2	ENSG00000236678.2	Intergenic	ENSEMBL
p9478	0.000277159	1.04396e-07	0.8667	308.331	376.379	354.172	267.548	5.17789	627.673	ENST00000413911.1	2	-	191745522	191746785	1263	2	ENSG00000235852.1	Antisense	ENSEMBL
p1406	6.14317e-06	3.74234e-13	0.867715	62.8224	91.7482	9.94352	59.4012	21.0214	62.3288	ENST00000435108.1	1	+	223317390	223318296	906	2	ENSG00000236846.1	Divergent	ENSEMBL
p33722	9.83922e-12	0.00811257	0.867963	704.886	696.656	182.721	382.493	564.417	428.172	NR_038967.1	7	+	102004307	102067129	62822	9	LOC100630923	Antisense	RefSeq
p19619	1.43979e-06	0.000764307	0.868273	78.3154	58.2774	76.8468	93.3692	6.41563	85.5391	TCONS_00024182	15	-	80578053	80634122	56069	3	XLOC_011544	Intergenic	HumanLincRNACatalog
p8798	1.0334e-07	6.05614e-10	0.868561	1109.41	472.103	1196.81	51.5634	821.824	1539.76	ENST00000596839.1	19	+	48621694	48630641	8947	4	ENSG00000269534.1	Antisense	ENSEMBL
p28626	4.76648e-06	4.48715e-13	0.868601	66.954	75.9064	94.8424	58.8475	83.4749	64.1467	ASO3889	None	None	None	None	#VALUE!	None	ASO3889	Intronic	RNAdb
p28352	5.48942e-07	1.17889e-09	0.868609	116.889	174.824	46.7213	113.508	43.9627	136.497	ASO1906	None	None	None	None	#VALUE!	None	ASO1906	Intergenic	RNAdb
p24442	2.47565e-05	7.19497e-06	0.868777	78.3518	60.402	50.4591	25.7222	86.308	52.3535	TCONS_00015980	9	+	38949736	38998487	48751	4	XLOC_007354	Intergenic	HumanLincRNACatalog
p8561	9.63372e-11	8.4874e-13	0.868868	118.229	137.978	97.5782	88.3702	30.4205	188.601	ENST00000591898.1	19	+	12146637	12157090	10453	3	ENSG00000219665.4	Antisense	ENSEMBL
p20590	1.31829e-06	6.65688e-13	0.869271	304.389	364.6	153.664	191.031	79.1944	444.882	TCONS_00027153	19	-	781013	789792	8779	3	XLOC_013194	Intergenic	HumanLincRNACatalog
p23258	8.29757e-07	9.18707e-12	0.869634	215.034	297.537	65.4743	124.449	93.2541	284.984	TCONS_00012253	6	-	113695863	113698013	2150	2	XLOC_005808	Intergenic	HumanLincRNACatalog
p16562	1.55839e-10	0.120856	0.869706	40.6492	4026.05	1210.86	334.493	4216.59	38.8407	ENST00000433997.1	9	-	101609510	101634560	25050	2	ENSG00000267026.1	Antisense	ENSEMBL
p18880	1.88445e-07	1.62753e-07	0.869811	100.132	162.966	186.181	113.355	168.704	108.729	TCONS_00020480	12	+	77407016	77407562	546	2	XLOC_009811	Intergenic	HumanLincRNACatalog
p7551	3.21828e-10	3.1133e-15	0.870394	1031.76	703.489	1478.2	495.867	486.997	1814.1	ENST00000575922.1	17	+	79202506	79207783	5277	4	ENSG00000260005.2	Antisense	ENSEMBL
p12208	9.95723e-11	9.26498e-10	0.8704	6076.31	1560.45	1645.38	2979.55	536.005	4563.61	ENST00000442941.1	3	+	196158255	196159401	1146	2	ENSG00000225822.3	Antisense	ENSEMBL
p15276	4.05231e-05	7.81732e-08	0.870903	331.694	343.323	391.46	143.216	316.513	469.068	ENST00000517635.2	7	+	27154966	27162996	8030	2	ENSG00000253552.3	Antisense	ENSEMBL
p26120	0.839413	5.56277e-09	0.871001	215.739	151.621	175.371	254.928	66.4892	151.302	uc010fkt.3	2	+	113993106	114024580	31474	5	LOC654433	Antisense	UCSC
p4122	3.40959e-05	0.000560308	0.871103	84.0812	60.9238	48.4622	61.9243	33.6224	72.9832	ENST00000569854.1	13	-	111462022	111465431	3409	1	ENSG00000259831.1	Intergenic	ENSEMBL
p29213	0.107151	5.4141e-09	0.8714	681.178	677.102	810.246	931.14	231.548	726.965	ENST00000601192.1	19	-	4791756	4795567	3811	2	ENSG00000269604.1	Antisense	ENSEMBL
p23411	0.165502	0.0172106	0.871423	77.4577	63.9502	17.3657	4.56435	68.84	64.9547	TCONS_00012441	6	+	26474582	26477465	2883	2	XLOC_005210	Antisense	HumanLincRNACatalog
p6161	0.00190777	6.72473e-08	0.871444	65.7749	5.87905	83.8191	84.7859	16.6653	34.0349	ENST00000565904.1	16	-	83743783	83751503	7720	3	ENSG00000261103.1	Intronic	ENSEMBL
p3332	6.54505e-05	2.52537e-07	0.871842	623.821	121.097	529.318	107.801	113.626	889.504	ENST00000549532.1	12	-	94885321	94890218	4897	2	ENSG00000257400.1	Intergenic	ENSEMBL
p25042	0.0166317	7.71957e-14	0.872243	341.169	249.076	2.89731	111.184	165.954	240.226	NR_046242.1	16	+	66442426	66444804	2378	2	LOC100505865	Intergenic	RefSeq
p24957	2.85494e-10	0.000139726	0.872491	60.1068	75.0875	3.19516	41.9625	7.83951	70.9416	NR_038381.1	13	+	45150031	45154568	4537	3	TSC22D1-AS1	Antisense	RefSeq
p8198	5.07232e-10	5.45055e-11	0.872547	6978.18	4347.79	2325.52	2801.89	3711.15	5398.52	ENST00000599676.1	19	-	16243380	16250631	7251	2	ENSG00000269243.1	Antisense	ENSEMBL
p33803	9.92024e-11	4.17154e-09	0.87277	7442.6	443.727	1916.08	1644.74	1510.03	5400.48	uc002xdp.1	20	-	34220232	34262539	42307	9	CPNE1	Antisense	UCSC
p5964	0.271983	5.52965e-16	0.872909	760.465	829.002	834.266	801.069	554.576	760.053	ENST00000566537.1	16	-	29817816	29819053	1237	2	ENSG00000259952.1	Antisense	ENSEMBL
p14630	0.00013383	7.89734e-07	0.873321	75.7479	98.636	32.0654	35.071	68.2461	76.9794	ENST00000411442.1	6	+	100874993	100885360	10367	2	ENSG00000228082.1	Intronic	ENSEMBL
p12885	1.57251e-05	0.000156627	0.873536	137.929	126.459	186.684	93.077	172.727	128.224	ENST00000503009.1	4	+	135345021	135379007	33986	3	ENSG00000251291.1	Intergenic	ENSEMBL
p3315	1.40122e-07	3.23937e-10	0.873578	79.6936	79.6443	30.0098	67.8778	26.4927	71.0395	ENST00000552532.1	12	-	82874896	82891339	16443	3	ENSG00000258170.1	Intergenic	ENSEMBL
p2066	2.99355e-07	0.0931582	0.874097	77.0041	75.505	55.0954	82.3188	48.9092	50.2385	ENST00000425365.1	10	+	92222473	92227709	5236	3	ENSG00000238291.1	Intergenic	ENSEMBL
p351	8.01498e-08	2.95924e-16	0.874204	203.831	279.369	239.65	75.7601	192.517	363.642	ENST00000421157.1	1	-	113554308	113615727	61419	3	ENSG00000238198.1	Divergent	ENSEMBL
p3333	0.000215145	5.01458e-05	0.87474	94.9835	48.3249	52.0919	41.2361	27.231	102.457	ENST00000551656.1	12	-	95781665	95782334	669	2	ENSG00000258313.1	Intergenic	ENSEMBL
p5444	0.000894491	4.79279e-06	0.874886	165.01	167.751	70.4881	1.74949	170.225	180.822	ENST00000383025.2	15	+	25322012	25330407	8395	6	ENSG00000224078.5	Intergenic	ENSEMBL
p28120	1.2873e-07	0.00301072	0.875643	66.9212	30.2688	93.9501	7.84579	54.5253	104.999	int-HOXA3-12	7	+	26932092	26932371	279	1	int-HOXA3-12	Intergenic	HOX Loci
p25314	0.298051	0.00181426	0.876	5270	1777.66	2525.65	822.576	3668.69	3894.96	NR_033339.1	4	+	1243227	1246795	3568	2	CTBP1-AS1	Divergent	RefSeq
p33420	5.33129e-09	6.07879e-07	0.87655	106.381	124.396	139.629	19.2642	23.8418	281.573	ENST00000559094.1	15	-	31514998	31523036	8038	4	ENSG00000259772.1	Antisense	ENSEMBL
p22848	5.41525e-07	5.44548e-05	0.876591	332.922	204.428	463.837	191.998	261.802	423.831	TCONS_00011088	5	-	173133321	173141957	8636	2	XLOC_005087	Intergenic	HumanLincRNACatalog
p11233	0.239202	2.58673e-11	0.877023	94.4304	102.483	73.9627	162.475	12.6983	62.3917	ENST00000423737.1	22	+	48027422	48251349	223927	9	ENSG00000224271.1	Intergenic	ENSEMBL
p33571	2.06736e-05	1.19542e-06	0.87707	7151.53	2152.65	3704.03	4396.88	1172.37	5839.85	ENST00000443574.1	6	-	32627662	32630227	2565	2	ENSG00000241287.1	Antisense	ENSEMBL
p26148	0.00874613	3.77605e-13	0.87726	334.031	349.63	476.449	245.512	429.79	342.416	uc002wvw.2	20	+	30009241	30016977	7736	3	NR_002577	Intergenic	UCSC
p2050	2.35483e-10	0.000244683	0.877393	611.894	526.764	832.218	473.532	242.709	1012.99	ENST00000454709.1	10	+	88873710	88875280	1570	2	ENSG00000237280.1	Intronic	ENSEMBL
p12277	0.00571005	1.55512e-11	0.877548	303.073	474.517	229.233	291.063	76.6758	515.798	ENST00000503034.1	4	-	37589708	37590497	789	2	ENSG00000248936.1	Antisense	ENSEMBL
p8131	3.80835e-05	1.91576e-07	0.87883	62.7086	55.7182	39.2644	66.5824	28.9124	43.089	ENST00000520090.2	19	-	2915143	2926805	11662	3	ENSG00000253392.2	Antisense	ENSEMBL
p14963	0.0015341	3.16413e-06	0.879293	61.0077	75.8959	48.0781	56.0186	62.0131	44.6215	ENST00000421767.1	7	-	65841030	65866325	25295	7	ENSG00000179406.6	Intergenic	ENSEMBL
p15280	6.94706e-10	9.69324e-08	0.879631	111.158	124.36	75.6834	31.2748	32.9689	209.499	ENST00000517641.1	7	+	27162061	27163437	1376	2	ENSG00000253552.3	Antisense	ENSEMBL
p7632	2.08155e-10	7.47358e-07	0.880293	1117.77	1125.25	288.999	1107.91	485.182	635.825	ENST00000586474.1	18	-	11851412	11852750	1338	2	ENSG00000267165.1	Intronic	ENSEMBL
p6586	4.85572e-06	6.63212e-13	0.880301	287.072	459.044	413.492	369.653	159.961	491.19	ENST00000568633.1	16	+	88739803	88741899	2096	1	ENSG00000260630.2	Intergenic	ENSEMBL
p24430	0.130263	9.63906e-06	0.880366	1326.59	1008.29	1064.87	290.468	1349.94	1352.62	TCONS_00016565	9	+	33730334	33749410	19076	5	XLOC_007326	Intergenic	HumanLincRNACatalog
p33600	1.28286e-09	2.67398e-12	0.880503	82.2849	1.70523	68.801	9.44727	29.9515	95.1342	ENST00000452468.1	X	-	70934220	70936237	2017	5	ENSG00000215115.5	Antisense	ENSEMBL
p2992	5.38674e-06	0.792512	0.880665	65.5348	91.4052	52.2797	96.8834	34.3747	52.9943	ENST00000524962.2	11	+	125821760	125825832	4072	4	ENSG00000254967.2	Divergent	ENSEMBL
p4155	0.549569	1.02274e-06	0.880874	1219.67	1217.78	957.174	445.145	1203.24	1341.85	ENST00000443092.1	13	+	23993109	24002818	9709	2	ENSG00000229558.1	Intronic	ENSEMBL
p23656	1.59425e-06	1.58677e-05	0.88097	303.259	308.241	446.998	194.341	333.093	405.072	TCONS_00013802	7	-	53448225	53466198	17973	2	XLOC_006444	Intergenic	HumanLincRNACatalog
p28159	1.18193e-10	6.15232e-07	0.881046	75.0208	33.066	76.6772	38.4187	22.0868	102.28	int-HOXB3-86	17	+	44000828	44001877	1049	1	int-HOXB3-86	Intronic	HOX Loci
p33415	0.00148575	4.79075e-05	0.88107	4594.2	2975.33	2880.74	3770.43	2302.74	3134.25	ENST00000555624.1	14	+	21387519	21388458	939	2	ENSG00000136315.3	Intergenic	ENSEMBL
p21861	3.08773e-06	3.94904e-08	0.881207	210.437	225.47	85.7829	43.5399	115.288	300.889	TCONS_00007180	3	-	64928164	64961877	33713	2	XLOC_003149	Intergenic	HumanLincRNACatalog
p14242	1.75445e-05	0.000108375	0.881431	282.655	400.783	119.871	194.899	133.681	379.482	ENST00000426635.2	6	-	72124147	72130472	6325	4	ENSG00000233237.2	Intergenic	ENSEMBL
p33717	1.61783e-05	4.33224e-05	0.881572	328.213	460.436	372.288	219.172	283.279	520.999	NR_073169.1	7	-	150709296	150721586	12290	18	ATG9B	Antisense	RefSeq
p26565	8.18584e-09	6.13987e-11	0.881577	116.354	181.479	23.5035	98.8929	1.10898	183.281	uc004cxr.1	X	+	16853680	16855808	2128	1	AX746622	Antisense	UCSC
p21546	1.05314e-09	1.04622e-12	0.881987	93.7977	111.901	113.884	134.213	17.6699	129.984	TCONS_00028194	20	+	46653531	46702929	49398	4	XLOC_013547	Intergenic	HumanLincRNACatalog
p3518	0.0159219	9.30816e-06	0.882014	220.242	218.238	282.875	137.125	247.172	251.948	ENST00000501075.2	12	+	6687787	6693905	6118	2	ENSG00000247853.2	Antisense	ENSEMBL
p19623	2.07183e-11	0.0752911	0.882544	65.3701	99.5895	3.20333	41.3758	52.62	54.4155	TCONS_00023754	15	-	80637196	80640120	2924	2	XLOC_011545	Intergenic	HumanLincRNACatalog
p19179	0.012964	1.28667e-05	0.882652	65.3786	78.542	14.1066	82.191	29.4833	27.8086	TCONS_00021760	13	+	40177555	40215175	37620	3	XLOC_010354	Divergent	HumanLincRNACatalog
p1633	0.00107827	0.937215	0.882652	2530.64	3671.44	1014.92	2072.54	1027.09	3270.48	ENST00000580790.1	10	-	75458908	75490245	31337	12	ENSG00000242288.4	Intergenic	ENSEMBL
p6169	1.53167e-08	0.939929	0.883426	65.1575	57.1451	58.7896	17.7858	93.5922	48.6037	ENST00000562835.1	16	-	83963400	83964715	1315	2	ENSG00000260932.1	Intergenic	ENSEMBL
p8951	1.35862e-14	1.84678e-05	0.883611	625.675	741.421	814.948	574.41	121.998	1231.67	ENST00000592565.1	2	-	6757945	6774055	16110	3	ENSG00000236172.2	Intergenic	ENSEMBL
p19643	3.90954e-06	0.000945229	0.883802	114.821	96.7944	88.2349	67.5459	75.1625	122.3	TCONS_00023782	15	-	91221715	91256533	34818	2	XLOC_011577	Intergenic	HumanLincRNACatalog
p3015	1.36434e-05	1.92098e-07	0.884054	317.579	236.473	141.736	57.2473	182.21	375.657	ENST00000531938.1	11	+	133907003	133909834	2831	2	ENSG00000204241.3	Intergenic	ENSEMBL
p5711	1.38067e-10	5.77369e-06	0.884082	126.207	195.899	130.191	119.335	88.5896	191.942	ENST00000560696.1	15	+	87476110	87489562	13452	3	ENSG00000259636.1	Intronic	ENSEMBL
p28934	3.10319e-06	1.88093e-07	0.884332	3478.35	4475.3	1958.27	3888.14	2396.6	2480.69	ENST00000488745.1	1	-	28905052	28909495	4443	6	ENSG00000197989.8	Antisense	ENSEMBL
p22665	0.00036869	0.000417384	0.884454	58.2508	92.706	41.7307	64.9133	76.7186	28.7911	TCONS_00010241	5	-	1159525	1161418	1893	2	XLOC_004701	Intergenic	HumanLincRNACatalog
p8263	3.54275e-06	1.55322e-13	0.885543	101.766	38.0766	42.9831	36.5928	40.5472	84.7601	ENST00000587140.1	19	-	28823703	28877111	53408	5	ENSG00000267320.1	Intergenic	ENSEMBL
p13368	4.35001e-07	8.71228e-05	0.885581	86.5872	31.0871	64.3986	10.9338	65.0825	85.224	ENST00000458103.2	5	-	122423328	122425994	2666	2	ENSG00000223652.2	Antisense	ENSEMBL
p3896	0.00302973	5.04287e-05	0.885585	73.5128	68.7491	23.398	69.8314	11.3654	65.5091	ENST00000535976.1	12	+	122880152	122885404	5252	3	ENSG00000257097.1	Intronic	ENSEMBL
p33843	0.0985183	1.77148e-06	0.885697	7510.52	4159.56	3424.45	2711.78	4095.39	6562.01	uc010mnq.2	9	+	69065545	69106241	40696	5	AK311167	Intergenic	UCSC
p13448	0.248156	4.75429e-06	0.885907	405.257	709.528	186.349	703.52	18.8807	430.282	ENST00000412431.2	5	-	148872948	148880816	7868	3	ENSG00000230551.3	Antisense	ENSEMBL
p16559	0.088177	0.054799	0.886311	1408.15	1445	880.037	1364.76	252.878	1691.13	ENST00000437864.1	9	-	100396796	100398333	1537	3	ENSG00000231521.1	Intronic	ENSEMBL
p25703	1.01639e-05	5.00637e-09	0.886781	63.1714	2.04101	63.0604	84.9148	7.65229	21.1828	uc009wpd.1	1	+	155105263	155106131	868	1	AK308965	Intronic	UCSC
p10588	0.000614953	4.69734e-10	0.887102	207.863	281.427	8.5893	146.612	65.9407	229.117	ENST00000417630.1	20	+	44116252	44118888	2636	2	ENSG00000237464.1	Intergenic	ENSEMBL
p19152	0.167691	4.34533e-05	0.887208	6134.31	4262.04	3321.58	2523.81	3930.43	5716.43	TCONS_00021722	13	+	23507414	23508772	1358	2	XLOC_010305	Intergenic	HumanLincRNACatalog
p19264	1.68063e-07	1.80338e-09	0.887347	77.0746	38.4943	78.2703	97.2544	5.9986	68.7496	TCONS_00021900	13	+	110675350	110707162	31812	2	XLOC_010496	Intergenic	HumanLincRNACatalog
p28090	0.00741929	0.483361	0.888	4056.95	2906.34	4474	1109.19	3073.31	5973.83	nc-HOXD3-44	2	+	176853205	176853304	99	1	nc-HOXD3-44	Intronic	HOX Loci
p22319	0.000109062	2.06109e-05	0.888592	195.358	253.383	270.821	127.22	293.66	218.517	TCONS_00009085	4	-	90466474	90472453	5979	2	XLOC_004016	Intergenic	HumanLincRNACatalog
p4517	1.86642e-07	0.00206511	0.888611	6844.23	3862.81	2174.7	2467.32	3169.69	5809.85	ENST00000556002.1	14	-	58733325	58764820	31495	4	ENSG00000257621.2	Antisense	ENSEMBL
p14456	0.00134959	3.33814e-08	0.889128	5622.77	1344.68	3137.38	2553.16	670.616	5760.71	ENST00000454015.1	6	+	2988891	2990486	1595	2	ENSG00000244041.2	Intergenic	ENSEMBL
p6973	3.22476e-10	7.30694e-06	0.890065	198.232	194.06	294.953	204.233	67.9496	339.51	ENST00000435892.1	17	-	61271290	61275146	3856	2	ENSG00000233635.2	Antisense	ENSEMBL
p4792	0.034506	2.21809e-06	0.890241	125.686	106.814	112.39	56.0488	122.757	128.229	ENST00000557350.1	14	+	39572343	39573016	673	2	ENSG00000258651.1	Antisense	ENSEMBL
p9171	5.05454e-07	3.61667e-06	0.890518	100.857	30.7005	81.5235	16.4977	56.4517	116.803	ENST00000600508.1	2	-	65669188	65683462	14274	4	ENSG00000234255.3	Intergenic	ENSEMBL
p7144	1.05615e-10	1.24565e-08	0.890841	85.7148	52.8489	57.9712	20.8821	31.7296	122.47	ENST00000571689.1	17	+	5095398	5138938	43540	8	ENSG00000261879.1	Antisense	ENSEMBL
p8515	0.910126	1.14159e-11	0.890896	218.689	230.842	237.141	203.176	188.908	219.669	ENST00000589360.1	19	+	3544196	3557567	13371	2	ENSG00000267436.1	Antisense	ENSEMBL
p28616	0.0305219	4.97435e-09	0.891035	3949.14	175.57	4450.8	81.6573	3664.84	3894.58	ASO3877	None	None	None	None	#VALUE!	None	ASO3877	Antisense	RNAdb
p26364	3.29621e-05	8.38926e-08	0.891394	73.6533	1.17226	71.2754	34.6523	25.0803	70.5008	uc003ndn.3	6	+	22146882	22194616	47734	4	LINC00340	Intergenic	UCSC
p15458	1.3065e-05	1.04556e-07	0.8915	166.42	95.9355	108.048	71.6489	69.5058	189.06	ENST00000484322.1	7	+	123672258	124035172	362914	9	ENSG00000242593.1	Antisense	ENSEMBL
p5431	0.000165314	8.86373e-10	0.891552	59.7645	37.5753	84.8213	84.6244	51.5069	26.2749	ENST00000565295.1	15	+	24792942	24811927	18985	4	ENSG00000259905.1	Intergenic	ENSEMBL
p10115	1.41484e-07	0.9083	0.891862	116.856	77.4329	160.922	59.2442	126.305	131.25	ENST00000449168.1	2	+	176032631	176033250	619	2	ENSG00000229750.1	Antisense	ENSEMBL
p5514	9.72849e-11	0.0145386	0.89205	1323.44	1043.92	446.268	951.299	991.684	566.908	ENST00000560415.1	15	+	40617416	40618916	1500	2	ENSG00000259330.1	Intergenic	ENSEMBL
p12946	1.55716e-06	4.64294e-10	0.892221	61.5708	87.0989	14.239	73.7374	13.2428	58.3704	ENST00000597939.1	4	+	156226149	156275526	49377	4	ENSG00000250910.2	Antisense	ENSEMBL
p29595	0.00228269	0.0160073	0.892434	98.4552	171.955	2.90758	66.668	89.9222	87.3281	TCONS_00019044	10	-	127389081	127400192	11111	5	XLOC_008982	Intergenic	HumanLincRNACatalog
p19786	0.859637	7.08038e-12	0.892766	3293.44	4064.35	3486.24	1867.99	3384.45	4428.73	TCONS_00023975	15	+	74060468	74061302	834	2	XLOC_011305	Intergenic	HumanLincRNACatalog
p18045	0.0314518	0.161128	0.892891	286.816	376.792	189.876	156.848	232.568	372.652	TCONS_00017697	10	+	3360886	3791666	430780	2	XLOC_008349	Intergenic	HumanLincRNACatalog
p12755	0.342183	1.74151e-12	0.892909	332.884	71.6221	475.721	476.282	142.403	167.278	ENST00000504301.1	4	+	70047817	70080193	32376	5	ENSG00000250696.1	Antisense	ENSEMBL
p14518	0.254555	0.0187706	0.89291	2882.93	3550.4	3321.87	763.088	4651.28	3296.15	ENST00000541196.1	6	+	31430961	31432156	1195	2	ENSG00000206337.6	Intergenic	ENSEMBL
p4850	0.0878268	2.00334e-10	0.892974	104.529	17.8295	106.906	64.5105	93.156	47.0602	ENST00000561909.1	14	+	64010286	64011382	1096	1	ENSG00000261242.1	Divergent	ENSEMBL
p13221	2.36467e-07	0.000217415	0.893157	284.593	162.844	348.554	89.51	220.022	401.412	ENST00000506196.1	5	-	72750011	72768721	18710	5	ENSG00000251324.1	Intergenic	ENSEMBL
p10410	2.92852e-05	3.95494e-07	0.893454	108.954	167.143	15.7648	5.24412	135.532	119.989	ENST00000449519.1	20	-	30615555	30619378	3823	2	ENSG00000226239.1	Antisense	ENSEMBL
p19638	1.03426e-10	6.10699e-06	0.894182	118.205	148.505	167.754	122.816	108.346	157.328	TCONS_00023774	15	-	89147416	89147848	432	2	XLOC_011569	Intergenic	HumanLincRNACatalog
p5570	0.000393756	1.19221e-05	0.894292	5113.43	2309.1	486.267	130.702	1867.27	5074.8	ENST00000561007.1	15	+	51706293	51791030	84737	6	ENSG00000259678.1	Antisense	ENSEMBL
p21009	0.246261	5.27875e-07	0.894377	984.049	1324.38	441.209	959.588	352.083	1147.55	TCONS_00004646	2	-	242835751	242843498	7747	3	XLOC_002558	Intergenic	HumanLincRNACatalog
p22617	3.13193e-09	9.45492e-10	0.894407	64.6772	82.7442	40.5535	40.4035	60.1269	67.5957	TCONS_00008948	4	+	184393763	184400227	6464	2	XLOC_003802	Intergenic	HumanLincRNACatalog
p7289	4.13353e-16	5.54883e-11	0.894729	1176.27	1213.72	853.628	1263.47	937.857	700.824	ENST00000431308.1	17	+	28934663	28961180	26517	6	ENSG00000214719.5	Intergenic	ENSEMBL
p12211	9.6251e-11	0.00672619	0.894751	997.903	740.772	523.774	425.226	1202	397.099	ENST00000602845.1	3	+	196669493	196670411	918	1	ENSG00000270170.1	Divergent	ENSEMBL
p23532	2.48534e-06	0.000280973	0.894772	94.4797	178.97	128.253	135.093	137.79	86.549	TCONS_00012602	6	+	132453297	132490332	37035	4	XLOC_005465	Intergenic	HumanLincRNACatalog
p14165	9.69829e-10	0.000820296	0.894982	64.0159	70.8469	8.36691	37.8585	46.2881	44.0414	ENST00000415890.1	6	-	37783552	37786994	3442	3	ENSG00000225945.1	Divergent	ENSEMBL
p10821	2.71704e-09	2.89213e-05	0.895068	63.6393	91.5595	24.9357	98.4417	6.43719	56.3538	ENST00000434859.1	21	+	25415571	25422601	7030	2	ENSG00000226996.1	Intergenic	ENSEMBL
p10467	1.01873e-05	2.28525e-05	0.895107	108.425	84.2199	116.745	140.94	19.2774	116.72	ENST00000431019.1	20	-	49187511	49194578	7067	2	ENSG00000232043.1	Antisense	ENSEMBL
p12204	0.117444	0.000635755	0.895456	329.453	47.2275	386.3	136.322	323.148	223.746	ENST00000420226.1	3	+	196045200	196050544	5344	2	ENSG00000235897.1	Antisense	ENSEMBL
p33413	8.68091e-08	3.88215e-05	0.895509	225.957	123.574	81.158	184.588	126.07	75.0274	ENST00000553909.1	14	+	21152745	21168735	15990	3	ENSG00000259171.1	Antisense	ENSEMBL
p5328	2.71637e-05	1.19825e-07	0.895681	329.233	19.381	351.405	259.82	190.46	176.713	ENST00000570120.1	15	-	89630793	89631498	705	2	ENSG00000261407.1	Antisense	ENSEMBL
p19711	0.600597	0.0003503	0.895748	80.7324	73.5125	22.6806	75.2408	28.5328	54.7072	TCONS_00023878	15	+	25247917	25264296	16379	2	XLOC_011183	Intergenic	HumanLincRNACatalog
p19511	0.397198	1.41213e-10	0.896078	338.208	302.537	7.25284	213.436	79.3222	287.899	TCONS_00022621	14	+	97925218	97935153	9935	3	XLOC_010922	Intergenic	HumanLincRNACatalog
p5615	2.6152e-06	0.542704	0.896228	2615.95	1920.31	3255.32	659.502	732.445	5591.08	ENST00000583044.1	15	+	64987239	64987793	554	1	ENSG00000265967.1	Intronic	ENSEMBL
p25076	0.118992	4.94143e-10	0.897038	208.691	236.444	81.4493	238.818	33.837	199.711	NR_026906.1	17	+	43716340	43723595	7255	3	CRHR1-IT1	Intronic	RefSeq
p5276	2.00752e-06	3.4957e-11	0.897098	213.086	249.6	86.333	16.403	103.368	372.753	ENST00000602975.1	15	-	77359995	77360667	672	1	ENSG00000269951.1	Intronic	ENSEMBL
p22137	1.83547e-06	6.21392e-06	0.897099	63.204	91.3618	91.8752	88.6535	84.2656	48.1628	TCONS_00006176	3	+	119817721	119824125	6404	2	XLOC_002779	Intergenic	HumanLincRNACatalog
p12897	0.156481	0.0002921	0.897289	78.1017	30.2886	3.66391	49.4445	23.4806	27.6198	ENST00000514752.1	4	+	139026872	139090561	63689	2	ENSG00000250033.1	Antisense	ENSEMBL
p3888	0.149581	1.34264e-11	0.897306	82.789	0.297992	74.8174	29.3248	58.0365	54.3273	ENST00000557474.1	12	+	121829764	121837662	7898	2	ENSG00000258435.1	Divergent	ENSEMBL
p33750	0.126653	1.8227e-06	0.89738	117.429	125.234	37.0292	104.468	82.8523	63.6708	uc009xny.1	10	-	49278238	49338996	60758	7	AK309922	Intergenic	UCSC
p16081	2.50675e-09	0.000634612	0.89765	51.6852	70.9706	30.6755	95.9212	16.8588	24.8579	ENST00000519692.1	8	+	23193720	23223638	29918	3	ENSG00000253837.1	Antisense	ENSEMBL
p25901	0.133058	0.00686202	0.897842	1428.87	1355.32	258.648	1375.03	515.971	840.982	uc001yrz.2	14	-	106105896	106330469	224573	8	DKFZp686O16217	Intergenic	UCSC
p17831	0.640099	0.000104652	0.897988	60.3009	23.4885	70.3665	45.5417	59.6604	33.2281	TCONS_00001252	1	+	207558528	207560344	1816	2	XLOC_000540	Intergenic	HumanLincRNACatalog
p5891	6.26478e-08	3.2584e-09	0.898497	61.3914	29.0356	17.9495	41.2666	15.2895	40.8198	ENST00000566957.1	16	-	12187483	12189164	1681	2	ENSG00000261293.1	Intronic	ENSEMBL
p27799	7.53628e-07	0.583348	0.89874	118.277	175.489	145.944	112.163	75.1433	207.878	uc.260+	9	+	81472423	81472654	231	1	uc.260+	Intergenic	UCR
p29209	6.13293e-06	2.483e-10	0.898896	1321.99	1487.4	286.154	714.65	314.461	1753.46	ENST00000585832.1	19	-	1268164	1270240	2076	2	ENSG00000267493.2	Antisense	ENSEMBL
p14591	0.00142361	0.00425989	0.899372	209.409	119.881	129.342	46.3762	84.5214	281.583	ENST00000435946.1	6	+	74779166	75400443	621277	4	ENSG00000223786.1	Intergenic	ENSEMBL
p15743	0.00152347	1.15433e-06	0.899584	99.6576	146.254	47.1092	190.532	9.42153	63.6437	ENST00000520365.1	8	-	65063662	65152839	89177	3	ENSG00000253554.1	Intergenic	ENSEMBL
p26219	2.36965e-14	2.31047e-06	0.899878	1386.2	191.026	1392.76	1344.74	471.987	855.904	uc003fwf.1	3	-	195961239	195964785	3546	1	AF088041	Divergent	UCSC
p6279	1.34276e-08	4.82938e-13	0.900062	75.575	20.8922	80.4353	50.4557	31.016	77.7517	ENST00000535363.1	16	+	10623296	10625939	2643	2	ENSG00000256013.1	Antisense	ENSEMBL
p27764	0.000340642	7.16044e-08	0.900535	64.0801	14.3379	64.339	23.9747	60.0249	44.5582	uc.260-	9	-	81472423	81472654	231	1	uc.260-	Intergenic	UCR
p19965	7.58812e-13	1.84302e-11	0.900564	96.861	144.211	71.7199	75.8367	66.9014	138.951	TCONS_00025086	16	-	86302609	86338058	35449	4	XLOC_012044	Intergenic	HumanLincRNACatalog
p5945	2.19688e-09	2.07016e-06	0.900641	101.92	148.455	120.328	28.4729	129.199	176.198	ENST00000562280.1	16	-	25151897	25160353	8456	3	ENSG00000260034.1	Intronic	ENSEMBL
p16908	0.000811109	3.45468e-07	0.900739	627.782	947.944	694.234	225.404	959.644	859.594	ENST00000602625.1	9	+	125086886	125087594	708	1	ENSG00000269979.1	Intergenic	ENSEMBL
p22056	0.451003	0.00673917	0.901156	197.133	153.76	176.7	260.989	17.888	196.566	TCONS_00006852	3	+	52279001	52279536	535	2	XLOC_002653	Divergent	HumanLincRNACatalog
p7619	1.16757e-06	0.000652938	0.90122	62.2909	46.7357	15.3788	35.5244	28.7485	47.8438	ENST00000580267.1	18	-	8635176	8636345	1169	2	ENSG00000266708.1	Antisense	ENSEMBL
p33400	5.17578e-05	0.00128967	0.901876	3025.77	2783.46	3154.77	1889.61	3606.7	2588.11	ENST00000541341.1	12	-	133398772	133424778	26006	6	ENSG00000257072.1	Antisense	ENSEMBL
p5406	0.495961	4.97782e-06	0.901955	111.751	64.9682	30.1368	67.3471	61.1021	58.1255	ENST00000560461.1	15	-	101455861	101459046	3185	3	ENSG00000259583.1	Antisense	ENSEMBL
p20808	0.477671	9.46239e-07	0.902197	62.2172	74.6596	26.564	86.0724	36.0839	25.2995	TCONS_00004207	2	-	38095167	38103451	8284	3	XLOC_002049	Intergenic	HumanLincRNACatalog
p25988	0.195851	1.3485e-08	0.902264	204.911	97.048	252.744	209.052	116.009	175.429	uc002fcj.1	16	+	72699067	72821759	122692	7	AK021563	Antisense	UCSC
p15101	1.18296e-05	9.28718e-08	0.902352	216.584	97.3272	213.537	3.65037	108.996	363.298	ENST00000562524.1	7	-	130121331	130124233	2902	1	ENSG00000259920.1	Intergenic	ENSEMBL
p10218	0.635403	0.826148	0.902822	1249.64	907.92	522.574	805.662	208.949	1405.07	ENST00000435627.1	2	+	206950245	206950880	635	2	ENSG00000227946.1	Antisense	ENSEMBL
p198	0.00376238	1.07496e-09	0.902842	88.969	22.5568	25.4945	39.9242	41.67	42.1135	ENST00000416119.1	1	-	55087149	55094111	6962	2	ENSG00000230728.1	Intronic	ENSEMBL
p27952	0.00350135	1.09786e-07	0.902989	1191.98	1005.43	1306.32	694.19	493.596	1976.04	nc-HOXA1-57	7	+	26910916	26911375	459	1	nc-HOXA1-57	Intergenic	HOX Loci
p18755	4.83571e-05	2.58006e-05	0.903098	81.288	52.7638	66.4593	30.6076	84.9256	65.5481	TCONS_00020997	12	-	130551605	130553098	1493	3	XLOC_010261	Intergenic	HumanLincRNACatalog
p12250	0.00205327	8.59628e-08	0.90354	137.895	182.724	74.5038	89.72	181.839	85.4508	ENST00000513384.1	4	-	15008070	15229584	221514	5	ENSG00000249252.1	Antisense	ENSEMBL
p25493	2.39182e-06	1.5268e-05	0.903669	63.6748	71.6824	26.1238	0.0246984	78.5978	67.3029	XR_132523.1	7	+	157056842	157059007	2165	1	LOC100506458	Intronic	RefSeq
p11240	0.0038182	6.93566e-07	0.904027	225.67	265.192	297.078	189.559	285.999	236.761	ENST00000380711.3	22	+	51021454	51022306	852	2	ENSG00000205559.3	Divergent	ENSEMBL
p7349	9.62223e-11	3.78648e-07	0.904053	736.035	108.874	343.736	0.0433469	765.919	308.636	ENST00000582842.1	17	+	37558045	37562486	4441	2	ENSG00000266469.1	Antisense	ENSEMBL
p26668	0.0161509	9.90497e-05	0.904241	3114.81	4890.12	577.84	805.481	3678.17	3277.24	HIT000325809	13	+	37583646	37583869	223	1	HIX0017428	Antisense	H-InvDB
p27994	0.0206598	3.98359e-05	0.904615	728.18	43.0578	932.501	7.07917	685.893	848.255	nc-HOXB4-175	17	+	44022188	44022337	149	1	nc-HOXB4-175	Intronic	HOX Loci
p33429	0.534333	2.62359e-13	0.90484	663.355	463.437	974.13	778.334	484.349	638.315	ENST00000466369.1	15	+	42640300	42704515	64215	28	ENSG00000258461.1	Antisense	ENSEMBL
p14231	0.000569761	3.72603e-10	0.905561	9931.73	1557.29	2249.69	1867.93	1567.86	9005.45	ENST00000450998.1	6	-	72012544	72037787	25243	5	ENSG00000232295.3	Divergent	ENSEMBL
p11855	0.00393729	8.74134e-06	0.906034	220.882	183.915	184.379	54.426	206.592	272.796	ENST00000596659.1	3	+	69063314	69066658	3344	2	ENSG00000244513.2	Divergent	ENSEMBL
p28532	0.000106885	7.65886e-10	0.90606	208.187	290.9	125.078	202.916	84.2588	278.356	ASO1771	None	None	None	None	#VALUE!	None	ASO1771	Antisense	RNAdb
p19959	3.49124e-09	9.46204e-10	0.906227	76.9162	42.2285	55.99	3.5344	69.4764	85.7012	TCONS_00024758	16	-	86191730	86192470	740	2	XLOC_012042	Intergenic	HumanLincRNACatalog
p2519	1.24938e-09	3.82062e-07	0.90627	66.3024	97.4542	90.4765	97.2247	64.1926	68.9866	ENST00000527329.1	11	-	117886486	117957508	71022	4	ENSG00000255274.3	Antisense	ENSEMBL
p29210	8.74773e-10	0.0178264	0.906449	116.878	138.319	162.646	9.62171	126.414	242.718	ENST00000586395.1	19	-	1952587	1954585	1998	3	ENSG00000180846.4	Intronic	ENSEMBL
p33529	1.65189e-05	1.97432e-10	0.90671	407.069	20.5098	719.642	118.652	410.499	511.047	ENST00000421572.1	22	+	18958095	18978396	20301	4	ENSG00000237517.4	Intergenic	ENSEMBL
p19038	1.01314e-10	3.59795e-07	0.906771	81.3756	27.7502	91.1552	13.0478	64.6975	103.864	TCONS_00022273	13	-	46687932	46695391	7459	2	XLOC_010595	Intergenic	HumanLincRNACatalog
p2284	6.04354e-07	0.594049	0.907251	300.288	311.873	485.11	208.784	388.933	397.784	ENST00000526225.1	11	-	45772656	45773124	468	2	ENSG00000255226.1	Intergenic	ENSEMBL
p13839	2.67387e-10	0.0856295	0.907382	6908.75	3314.55	1898.93	2969.92	3431.13	4598.45	ENST00000515570.1	5	+	114938741	114956356	17615	3	ENSG00000249249.1	Antisense	ENSEMBL
p7768	0.110086	1.04493e-08	0.907616	200.23	246.132	71.9362	101.718	202.603	166.094	ENST00000585702.1	18	-	55628462	55631666	3204	3	ENSG00000267209.1	Intergenic	ENSEMBL
p8282	0.00275258	4.04914e-08	0.907726	116.919	68.1846	147.583	53.2705	146.664	102.054	ENST00000593140.1	19	-	31156180	31159554	3374	2	ENSG00000267760.1	Intergenic	ENSEMBL
p24746	0.159373	1.00919e-10	0.907889	205.226	188.624	112.001	6.72992	258.687	193.839	NR_026874.1	1	-	852952	854817	1865	4	LOC100130417	Intergenic	RefSeq
p3657	1.21575e-05	0.000305024	0.908009	1128.24	1408.42	1275.9	714.959	1222.15	1524.73	ENST00000548257.1	12	+	48744727	48836194	91467	4	ENSG00000257735.1	Antisense	ENSEMBL
p21101	0.131232	0.00679048	0.908164	202.2	250.949	44.2679	21.3174	238.686	191.733	TCONS_00003658	2	+	43055062	43180319	125257	2	XLOC_001446	Intergenic	HumanLincRNACatalog
p24488	0.00350142	0.0110296	0.908747	83.628	65.1326	52.3106	25.6827	27.409	129.631	TCONS_00016074	9	+	95555560	95559556	3996	3	XLOC_007463	Intergenic	HumanLincRNACatalog
p12830	5.53396e-07	2.46754e-12	0.909021	118.181	37.6072	146.512	94.329	149.081	31.3872	ENST00000508961.1	4	+	106621290	106629250	7960	3	ENSG00000249823.1	Intronic	ENSEMBL
p2362	0.00540429	9.00346e-10	0.909244	1028.46	1218.37	789.065	628.782	912.46	1219.13	ENST00000530805.1	11	-	66032247	66033137	890	3	ENSG00000254855.1	Antisense	ENSEMBL
p26937	9.62255e-11	1.19513e-15	0.909258	1245.98	197.737	215.509	63.6029	757.624	687.434	HIT000284266	X	+	47430989	47431326	337	1	HIX0016762	Antisense	H-InvDB
p373	1.06865e-05	1.63953e-08	0.909713	64.0413	27.3931	84.2819	34.8276	86.0886	38.9353	ENST00000457719.1	1	-	119802887	119869926	67039	3	ENSG00000227712.1	Intergenic	ENSEMBL
p13923	3.7289e-07	5.3729e-10	0.909839	63.8683	65.173	37.2525	42.2858	53.1348	55.88	ENST00000443800.1	5	+	141783765	142051566	267801	4	ENSG00000231185.2	Antisense	ENSEMBL
p22408	0.00704659	0.301631	0.910345	1397.67	1165.42	396.362	326.327	934.909	1432.89	TCONS_00008693	4	-	185395885	185397029	1144	2	XLOC_004206	Divergent	HumanLincRNACatalog
p5651	0.836056	8.55015e-13	0.910622	60.7774	59.4147	71.6945	99.0395	57.2299	18.4668	ENST00000563592.1	15	+	73075175	73090540	15365	3	ENSG00000260898.1	Antisense	ENSEMBL
p1939	1.47342e-05	1.95213e-07	0.910828	1037.48	1425.26	51.9134	517.564	257.973	1514.88	ENST00000434533.1	10	+	47186202	47192185	5983	2	ENSG00000224919.1	Antisense	ENSEMBL
p26366	0.0160068	3.05926e-09	0.911321	301.141	374.688	463.322	282.806	396.48	358.846	uc003oev.3	6	+	33551475	33556803	5328	6	GGNBP1	Intergenic	UCSC
p11519	0.895927	0.573942	0.911891	725.261	848.651	316.334	81.7491	661.63	980.319	ENST00000470236.1	3	-	136561298	136580896	19598	3	ENSG00000239213.1	Antisense	ENSEMBL
p8079	1.03959e-05	3.42773e-07	0.9119	65.8257	24.1292	48.8683	8.11395	77.8971	40.5818	ENST00000600589.1	18	+	74402045	74403498	1453	1	ENSG00000229055.3	Intergenic	ENSEMBL
p1857	1.81742e-08	1.90369e-05	0.911954	304.475	261.753	490.956	221.293	215.99	526.82	ENST00000428853.2	10	+	11072296	11072831	535	2	ENSG00000229206.2	Intronic	ENSEMBL
p10409	0.234266	5.49697e-07	0.912608	321.736	496.088	331.138	490.109	257.219	301.225	ENST00000412178.1	20	-	30155509	30161066	5557	3	ENSG00000230613.1	Antisense	ENSEMBL
p25188	0.0014987	5.63417e-09	0.913249	59.7832	33.1887	36.8512	7.62432	69.8259	41.1107	XR_109601.1	20	+	39609425	39653120	43695	3	LOC100128988	Intergenic	RefSeq
p16587	8.23465e-08	0.275985	0.913729	118.043	179.846	84.0103	19.2127	142.913	186.827	ENST00000415302.1	9	-	110189520	110190683	1163	2	ENSG00000226825.1	Intergenic	ENSEMBL
p27654	0.00073101	0.591977	0.913993	6216.67	3518.51	3656.24	3638.17	2061.61	6539.87	uc.203-	6	-	163991703	163991906	203	1	uc.203-	Antisense	UCR
p18487	2.78553e-05	1.35297e-09	0.914083	85.6614	36.656	79.4385	28.4939	68.8997	87.028	TCONS_00019385	11	+	72964637	72970234	5597	2	XLOC_009208	Intergenic	HumanLincRNACatalog
p23215	0.15083	2.42651e-07	0.914193	1104.93	1323.28	784.478	567.121	890.103	1479.79	TCONS_00012168	6	-	41137778	41145579	7801	2	XLOC_005716	Intergenic	HumanLincRNACatalog
p18377	1.18056e-08	3.37074e-07	0.914533	199.881	239.328	248.43	270.857	58.0565	299.956	TCONS_00019777	11	-	118935017	118938411	3394	2	XLOC_009576	Divergent	HumanLincRNACatalog
p28989	0.0378046	6.7696e-16	0.914652	1416.34	715.82	468.282	848.845	168.753	1360.9	ENST00000415104.1	1	+	148598397	148599531	1134	2	ENSG00000237253.1	Intergenic	ENSEMBL
p19468	3.12275e-10	0.000110753	0.914764	60.9359	82.9816	97.0919	37.5579	55.7373	127.172	TCONS_00022531	14	+	66219256	66220716	1460	2	XLOC_010855	Intergenic	HumanLincRNACatalog
p26180	5.26181e-11	5.5107e-12	0.914977	763.226	778.651	954.951	280.423	513.601	1490.52	uc003apb.1	22	-	36633472	36635231	1759	1	AX747758	Intronic	UCSC
p12341	3.56952e-10	3.83652e-11	0.915259	51.1484	25.6298	24.2741	29.1935	30.241	33.0545	ENST00000513871.1	4	-	78315644	78415440	99796	3	ENSG00000249036.1	Intergenic	ENSEMBL
p18948	1.37679e-06	4.67705e-08	0.915358	220.169	106.017	286.918	187.077	34.6458	339.487	TCONS_00020609	12	+	124574281	124576008	1727	2	XLOC_009926	Intronic	HumanLincRNACatalog
p19509	0.00113875	4.12508e-06	0.915509	88.1698	28.4655	17.0515	9.55936	63.2996	49.5325	TCONS_00022616	14	+	96107824	96108855	1031	2	XLOC_010918	Intergenic	HumanLincRNACatalog
p11841	3.55031e-09	5.54337e-08	0.915966	63.4983	21.401	42.8866	66.1352	2.32758	48.5848	ENST00000466225.2	3	+	64568826	64572897	4071	2	ENSG00000241158.2	Intronic	ENSEMBL
p11152	9.28911e-08	8.31968e-07	0.915992	127.165	92.6033	175.923	182.93	29.6048	149.915	ENST00000430525.1	22	+	28315471	28389493	74022	3	ENSG00000235954.2	Antisense	ENSEMBL
p16624	6.03561e-07	7.40639e-08	0.916371	105.281	16.3031	57.8554	0.615793	16.0502	147.767	ENST00000432418.1	9	-	129370391	129374798	4407	2	ENSG00000224842.2	Intergenic	ENSEMBL
p17175	0.000204393	6.37914e-14	0.91654	126.179	180.489	157.996	186.997	87.503	151.383	ENST00000435093.1	X	+	43808977	43828866	19889	5	ENSG00000236276.1	Antisense	ENSEMBL
p2157	5.81015e-07	2.6279e-06	0.916597	115.64	175.646	104.304	198.219	35.6585	128.719	ENST00000415809.1	11	-	3875547	3876739	1192	2	ENSG00000228661.1	Divergent	ENSEMBL
p20633	3.70316e-08	1.92656e-12	0.916655	104.626	54.369	82.3715	44.5387	82.1965	94.5143	TCONS_00027368	19	-	44388161	44405837	17676	2	XLOC_013350	Intergenic	HumanLincRNACatalog
p15966	1.76932e-06	3.96257e-08	0.916847	692.48	295.774	885.834	416.811	844.5	456.94	ENST00000517908.1	8	-	142136389	142140060	3671	2	ENSG00000253210.1	Antisense	ENSEMBL
p23734	0.705971	0.114784	0.916922	5212.13	1061.72	4245.55	1815.89	1982.36	5847.21	TCONS_00013288	7	+	389256	391503	2247	3	XLOC_005955	Intergenic	HumanLincRNACatalog
p33743	0.646254	5.57945e-12	0.917002	1146.01	676.352	263.037	512.311	182.017	1217.99	uc001gic.1	1	+	171763732	171766852	3120	1	AK094818	Antisense	UCSC
p23180	1.08353e-10	1.04152e-11	0.917903	210.468	35.6384	196.445	20.5607	45.017	340.641	TCONS_00012092	6	-	16126536	16129130	2594	2	XLOC_005622	Divergent	HumanLincRNACatalog
p27823	0.00108463	3.56055e-14	0.917937	66.7987	41.4148	47.6823	75.1555	26.2748	41.6722	uc.461-	X	-	24864796	24865193	397	1	uc.461-	Intronic	UCR
p5816	1.4724e-05	2.75063e-10	0.918502	117.32	49.405	39.9272	6.69892	85.7661	97.3456	ENST00000565937.1	16	-	2144830	2147027	2197	2	ENSG00000261123.1	Intronic	ENSEMBL
p17056	1.0967e-06	4.03898e-07	0.91917	1078.53	674.93	1317.01	1.56009	1376.09	1444.63	ENST00000456301.1	X	-	100258820	100262962	4142	2	ENSG00000228609.1	Intergenic	ENSEMBL
p173	4.1495e-07	4.16215e-06	0.919899	104.46	69.7347	189.515	114.271	110.781	109.525	ENST00000446167.1	1	-	44410041	44411974	1933	2	ENSG00000237950.1	Divergent	ENSEMBL
p25693	0.475982	0.000149977	0.919962	337.987	265.953	111.978	160.741	180.362	317.515	uc001edc.1	1	+	113499036	113542118	43082	3	BC047723	Divergent	UCSC
p12655	0.0372529	1.28224e-05	0.920086	110.224	180.423	83.4438	49.2278	193.327	101.641	ENST00000515188.1	4	+	25610332	25621087	10755	2	ENSG00000248545.1	Intergenic	ENSEMBL
p23273	1.44142e-05	0.194978	0.920115	58.0288	57.4617	95.2931	96.6574	66.1051	31.1825	TCONS_00012271	6	-	125633312	125634852	1540	2	XLOC_005826	Intergenic	HumanLincRNACatalog
p1594	0.00217217	0.0021009	0.920165	1434.55	1245.01	799.326	898.383	399.034	1903.73	ENST00000505718.1	10	-	49718567	49719632	1065	2	ENSG00000248682.1	Intronic	ENSEMBL
p15605	1.16092e-10	0.012918	0.920883	658.791	643.122	987.924	492.819	171.498	1444.36	ENST00000602711.1	8	-	11703662	11703900	238	1	ENSG00000269899.1	Intronic	ENSEMBL
p13080	4.43153e-06	4.19678e-08	0.921121	216.317	187.834	273.475	89.3347	227.738	307.104	ENST00000514078.1	5	-	9629557	9712490	82933	2	ENSG00000249781.1	Antisense	ENSEMBL
p23959	3.47534e-10	1.66664e-07	0.921496	137.151	81.1974	182.958	29.7363	138.72	201.346	TCONS_00015000	8	-	49428327	49429763	1436	2	XLOC_007080	Intergenic	HumanLincRNACatalog
p24661	9.89236e-09	8.15518e-09	0.921981	281.035	290.126	428.431	5.58179	497.93	418.094	TCONS_00017114	X	+	404881	420768	15887	2	XLOC_007910	Intergenic	HumanLincRNACatalog
p26815	2.75447e-08	0.000169884	0.922133	118.476	157.459	111.43	122.375	98.6814	136.145	eHIT000017922	4	+	76744174	76746529	2355	2	HIX0205238	Intergenic	H-InvDB
p14028	1.49899e-09	1.06662e-09	0.922388	137.59	137.895	188.098	108.781	126.8	192.022	ENST00000515513.1	5	+	173763297	173953457	190160	5	ENSG00000249306.1	Intergenic	ENSEMBL
p9773	4.21308e-07	0.00026685	0.922566	95.0477	3.54387	175.355	132.565	32.4225	87.7463	ENST00000418836.2	2	+	42104213	42105095	882	2	ENSG00000214691.6	Intergenic	ENSEMBL
p17089	6.16749e-10	3.53922e-12	0.922792	89.3864	3.32708	96.8761	16.3236	67.4233	91.2048	ENST00000416873.1	X	-	134257166	134257532	366	2	ENSG00000223809.1	Intergenic	ENSEMBL
p33702	0.00778847	5.63308e-06	0.923028	323.697	351.107	396.407	490.791	62.2233	435.743	NR_037162.1	3	+	9851643	9878040	26397	11	TTLL3	Antisense	RefSeq
p12015	0.0428971	9.29235e-09	0.923289	203.836	119.377	276.926	167.023	134.869	252.209	ENST00000481334.1	3	+	148029933	148117743	87810	3	ENSG00000242440.1	Intergenic	ENSEMBL
p13162	1.322e-10	4.95844e-10	0.923486	341.901	416.6	339.282	34.8236	371.249	607.715	ENST00000503179.1	5	-	44776857	44808861	32004	3	ENSG00000251141.1	Divergent	ENSEMBL
p5966	0.000611274	0.395283	0.923487	210.012	184.392	243.513	126.038	116.772	346.298	ENST00000569039.1	16	-	29820249	29831687	11438	4	ENSG00000261962.1	Antisense	ENSEMBL
p26458	6.1008e-05	5.66253e-11	0.923748	67.1148	27.2956	50.302	49.8195	55.3865	28.4718	uc003xqr.4	8	-	50047179	50047788	609	1	BC042029	Intergenic	UCSC
p15037	0.02171	0.0197054	0.923759	101.938	155.026	59.3832	181.382	29.0735	81.773	ENST00000450686.1	7	-	104590761	104653491	62730	3	ENSG00000228393.3	Intergenic	ENSEMBL
p24856	1.39946e-05	1.04713e-05	0.923772	100.06	88.295	190.908	6.96371	120.605	222.783	XR_158862.1	10	+	31610938	31647608	36670	3	LOC100996668	Intronic	RefSeq
p2521	7.33057e-05	0.188594	0.923788	4966.84	2054.55	1296.43	122.29	3503.89	4057.72	ENST00000525992.2	11	-	118390099	118401285	11186	3	ENSG00000255435.2	Antisense	ENSEMBL
p20133	1.0764e-07	5.9424e-12	0.924031	1017.63	1385.6	1175.59	473.84	1421.84	1411.26	TCONS_00025555	17	-	7967150	7968061	911	2	XLOC_012383	Intergenic	HumanLincRNACatalog
p10925	3.12944e-07	2.18496e-11	0.924525	114.359	62.1629	139.376	45.8984	108.564	137.594	ENST00000446649.1	21	+	47571527	47572561	1034	2	ENSG00000237338.1	Antisense	ENSEMBL
p21540	1.03063e-10	0.000802948	0.924553	1414.57	1445.73	1465.62	253.054	1495.79	2250.7	TCONS_00028183	20	+	46431522	46440897	9375	2	XLOC_013542	Intergenic	HumanLincRNACatalog
p23283	0.0851827	0.0354047	0.924639	110.521	90.1132	57.2364	48.7492	80.9227	108.765	TCONS_00012300	6	-	139777986	139795737	17751	4	XLOC_005856	Intergenic	HumanLincRNACatalog
p28503	2.13728e-08	3.01749e-09	0.925258	125.429	120.539	121.692	136.013	34.5821	169.586	ASO1931	None	None	None	None	#VALUE!	None	ASO1931	Intergenic	RNAdb
p13053	9.90491e-07	8.505e-07	0.925278	94.0389	150.879	36.0657	151.757	22.8427	85.3881	ENST00000559410.1	5	-	3596324	3600302	3978	2	ENSG00000259603.1	Antisense	ENSEMBL
p23150	1.93908e-08	2.39751e-07	0.925443	414.164	308.963	430.512	171.14	130.694	765.793	TCONS_00012046	6	-	2272910	2273285	375	2	XLOC_005578	Intergenic	HumanLincRNACatalog
p11897	1.25663e-10	0.0017869	0.925444	3195.72	2582.79	3562.18	2028.05	4464.5	2151.74	ENST00000463143.1	3	+	106959538	107045548	86010	3	ENSG00000243701.1	Intergenic	ENSEMBL
p26017	1.70637e-06	1.7099e-11	0.925671	79.8035	18.6439	68.2853	15.9326	48.9474	89.4596	uc021tqh.1	17	+	12890338	12892242	1904	1	DQ574806	Intronic	UCSC
p10287	0.036857	0.693535	0.925693	681.441	625.223	354.856	301.18	325.165	911.712	ENST00000455128.1	2	+	231751220	231758789	7569	2	ENSG00000232520.1	Intergenic	ENSEMBL
p13862	0.0663082	0.0100642	0.925817	98.0362	137.974	174.835	175.161	112.64	92.5664	ENST00000510570.1	5	+	123805283	123805594	311	1	ENSG00000250438.1	Intergenic	ENSEMBL
p29602	0.0442196	0.971475	0.926223	1065.71	1106.67	1407.26	966.808	775.434	1573.31	TCONS_00018766	10	+	81426555	81436343	9788	3	XLOC_008528	Intergenic	HumanLincRNACatalog
p6120	1.00961e-08	9.76478e-10	0.926307	1145.96	354.468	672.329	1213.43	118.894	680.313	ENST00000569032.1	16	-	77235370	77283854	48484	2	ENSG00000261063.1	Antisense	ENSEMBL
p16874	0.0465826	2.37051e-07	0.926627	344.369	379.406	378.638	308.098	364.991	348.437	ENST00000527128.1	9	+	100000730	100054275	53545	12	ENSG00000254876.1	Intergenic	ENSEMBL
p12137	0.167753	2.86663e-05	0.926859	98.931	160.516	153.885	167.705	161.779	53.6165	ENST00000490001.1	3	+	181670160	181718050	47890	7	ENSG00000242512.3	Intergenic	ENSEMBL
p10399	0.00732241	2.59661e-06	0.928178	326.441	214.982	434.679	4.20239	471.118	430.676	ENST00000416563.1	20	-	26113522	26114834	1312	2	ENSG00000230440.1	Intergenic	ENSEMBL
p25740	0.00320522	0.291522	0.928282	652.312	415.912	313.914	836.149	15.9308	430.932	uc001igd.3	10	+	1094996	1096202	1206	1	BC046483	Antisense	UCSC
p22453	0.00316932	0.00150598	0.928749	97.8726	15.3592	181.216	137.04	43.8133	92.6154	TCONS_00007993	4	+	11723920	11773404	49484	5	XLOC_003457	Intergenic	HumanLincRNACatalog
p7625	3.01222e-05	1.96854e-08	0.929032	78.957	59.463	9.48619	33.4158	2.60645	101.387	ENST00000582531.1	18	-	10323128	10372377	49249	6	ENSG00000264876.1	Intergenic	ENSEMBL
p12178	9.42002e-07	0.000438819	0.929097	78.6109	65.2031	94.5863	80.3068	72.9214	68.2688	ENST00000439479.1	3	+	194426276	194427693	1417	2	ENSG00000233987.1	Intergenic	ENSEMBL
p1194	5.59023e-08	0.233742	0.929363	3236.64	4192.67	3864.16	3288.98	4466.02	2740.75	ENST00000439719.1	1	+	149245049	149245801	752	2	ENSG00000223779.4	Intergenic	ENSEMBL
p9408	0.487326	9.94739e-09	0.929731	93.3373	30.6296	154.212	193.356	13.0028	52.2726	ENST00000457834.1	2	-	171201308	171207621	6313	2	ENSG00000231898.3	Intronic	ENSEMBL
p20609	0.000156953	4.66365e-08	0.929815	207.076	6.80027	273.663	2.62302	168.959	281.739	TCONS_00027275	19	-	28263986	28285209	21223	4	XLOC_013282	Intergenic	HumanLincRNACatalog
p4867	0.230421	3.92399e-05	0.929826	166.733	54.8476	64.0343	133.725	4.34881	127.498	ENST00000553944.1	14	+	69446757	69448270	1513	2	ENSG00000259062.1	Divergent	ENSEMBL
p16883	2.20047e-06	3.38778e-10	0.929889	759.404	473.657	827.639	496.488	428.8	990.934	ENST00000415465.1	9	+	111463649	111465372	1723	2	ENSG00000231678.1	Intergenic	ENSEMBL
p7276	4.70663e-05	4.63489e-08	0.930383	87.5156	61.8825	53.5283	37.6387	40.6451	110.515	ENST00000579154.1	17	+	27271813	27272412	599	1	ENSG00000265908.1	Intronic	ENSEMBL
p13844	1.8119e-07	0.747511	0.930399	297.581	394.001	331.146	221.938	109.991	619.615	ENST00000508640.1	5	+	115785323	115831817	46494	2	ENSG00000248445.1	Antisense	ENSEMBL
p21155	3.31007e-09	2.01082e-05	0.930451	17743	35065.4	26464.5	38076.1	21731.7	13951.7	TCONS_00002935	2	+	74378364	74381319	2955	2	XLOC_001532	Intergenic	HumanLincRNACatalog
p9614	4.48927e-06	3.1465e-13	0.930495	81.0363	46.519	43.6239	63.8651	6.43314	88.9832	ENST00000439270.1	2	-	242750204	242751718	1514	3	ENSG00000224272.2	Antisense	ENSEMBL
p13084	0.0115264	0.0184957	0.930904	98.2132	148.364	118.249	142.541	123.828	73.2487	ENST00000513037.1	5	-	10441401	10441904	503	2	ENSG00000250600.1	Divergent	ENSEMBL
p1747	0.00188213	0.809524	0.931062	283.4	190.765	425.151	268.377	136.524	432.418	ENST00000448834.1	10	-	115470439	115479091	8652	3	ENSG00000234393.1	Intronic	ENSEMBL
p6292	1.58386e-06	8.74036e-11	0.931361	50.0841	36.1483	21.4288	55.2909	17.5985	27.3821	ENST00000575792.1	16	+	14417150	14420141	2991	2	ENSG00000262454.1	Intergenic	ENSEMBL
p7418	4.63717e-05	1.09244e-11	0.931674	58.2202	8.61288	32.5433	5.06977	43.4273	44.0893	ENST00000451776.1	17	+	48212950	48223541	10591	4	ENSG00000236472.1	Antisense	ENSEMBL
p14349	7.07537e-07	0.149531	0.931952	312.142	400.026	361.249	217.757	329.592	453.024	ENST00000445585.1	6	-	140177240	140198528	21288	2	ENSG00000225148.1	Intergenic	ENSEMBL
p2443	2.5093e-09	4.6349e-09	0.932498	10596.2	4316.54	372.859	1146.78	4783.65	8323.32	ENST00000602381.1	11	-	82895532	82902139	6607	2	ENSG00000247137.3	Antisense	ENSEMBL
p11063	9.0632e-06	1.28818e-13	0.932905	116.028	113.305	164.253	198.839	46.0463	122.294	ENST00000449652.1	22	-	51174252	51176567	2315	2	ENSG00000225929.1	Divergent	ENSEMBL
p15305	0.0478802	0.999991	0.933022	201.637	85.7353	111.612	176.282	59.8472	136.132	ENST00000419103.1	7	+	30028215	30065276	37061	3	ENSG00000227014.1	Antisense	ENSEMBL
p27398	0.000404101	8.95526e-07	0.93309	65.316	45.0754	6.83257	19.9374	33.0396	56.4035	uc.88-	2	-	162095041	162095353	312	1	uc.88-	Intergenic	UCR
p4149	0.000324474	3.06583e-12	0.933223	98.9274	198.295	117.789	170.395	116.462	100.441	ENST00000422510.1	13	+	21579295	21592261	12966	2	ENSG00000233851.1	Intronic	ENSEMBL
p8827	0.00364652	4.51047e-08	0.933634	663.806	732.822	614.278	130.449	807.425	939.576	ENST00000526996.1	19	+	51918977	51919900	923	2	ENSG00000255441.1	Antisense	ENSEMBL
p13671	6.82542e-09	4.23222e-07	0.934094	17603.1	78268.5	31900.3	17881.5	65887.6	35581.8	ENST00000511712.1	5	+	44753050	44765846	12796	3	ENSG00000248779.1	Intergenic	ENSEMBL
p13323	8.61758e-05	0.370654	0.934357	92.6761	88.8378	187.519	59.2356	178.74	106.833	ENST00000503650.1	5	-	103819904	104728671	908767	3	ENSG00000251574.2	Intergenic	ENSEMBL
p7607	1.08222e-10	2.04163e-06	0.934441	286.678	436.187	355.862	127.085	417.202	463.72	ENST00000581798.1	18	-	5381639	5385329	3690	2	ENSG00000266288.1	Intergenic	ENSEMBL
p28276	0.0920027	1.93951e-10	0.934964	392.848	296.371	584.07	480.74	347.621	362.117	ASO1648	None	None	None	None	#VALUE!	None	ASO1648	Antisense	RNAdb
p18538	0.00011486	7.8899e-12	0.935955	93.1795	111.003	38.3014	127.69	12.5144	86.7497	TCONS_00019480	11	+	115605577	115628362	22785	2	XLOC_009283	Intergenic	HumanLincRNACatalog
p3964	0.0796973	5.70173e-08	0.936595	104.979	91.1379	135.609	219.012	51.6159	40.0645	ENST00000435725.2	13	-	25767244	25784433	17189	2	ENSG00000225105.2	Intergenic	ENSEMBL
p4986	4.32545e-09	1.68012e-10	0.936951	3565.09	2103.85	3267.61	521.71	1593.21	6258.19	ENST00000553301.1	14	+	101005275	101006746	1471	2	ENSG00000259031.1	Antisense	ENSEMBL
p22309	0.000301295	0.0762931	0.937369	77.6078	5.17014	33.587	52.9632	1.241	54.8727	TCONS_00008498	4	-	65792315	65803551	11236	2	XLOC_003971	Intergenic	HumanLincRNACatalog
p28139	5.68138e-08	9.24979e-09	0.938171	87.7698	77.0058	47.6297	44.6528	32.9794	121.64	int-HOXB3-66	17	+	43988742	43989611	869	1	int-HOXB3-66	Intronic	HOX Loci
p25304	0.357481	2.69043e-12	0.938185	104.343	116.281	46.1494	112.979	66.3288	70.9751	NR_034077.1	4	-	83814604	83822069	7465	4	THAP9-AS1	Antisense	RefSeq
p33908	0.0462906	1.23212e-06	0.938331	2573.63	1793.38	399.313	1901.87	241.501	2329.01	uc.49-	2	-	33813408	33813615	207	1	uc.49-	Antisense	UCR
p14010	2.28217e-10	0.850233	0.93857	210.118	249.272	96.9962	168.491	14.125	339.591	ENST00000521471.1	5	+	169758432	169760764	2332	3	ENSG00000235172.3	Intergenic	ENSEMBL
p23332	0.0287747	1.20086e-06	0.938846	309.923	369.406	472.944	393.261	234.693	453.852	TCONS_00012836	6	-	170453079	170454248	1169	2	XLOC_005944	Intergenic	HumanLincRNACatalog
p1106	0.821041	2.36321e-15	0.938866	313.14	222.278	463.42	349.975	271.076	316.724	ENST00000554749.1	1	+	110600961	110605177	4216	1	ENSG00000258634.2	Antisense	ENSEMBL
p24759	3.35149e-05	9.37646e-07	0.939008	114.37	49.8244	184.757	76.6951	91.8871	159.086	XR_159046.1	1	-	91485752	91487282	1530	2	LOC100996620	Intronic	RefSeq
p9727	0.000176475	1.99891e-06	0.940163	84.5628	48.8556	99.5206	94.1555	5.63153	119.214	ENST00000424364.2	2	+	33066080	33127190	61110	6	ENSG00000230876.2	Intergenic	ENSEMBL
p3480	3.48124e-08	0.113689	0.940176	109.93	159.855	114.68	78.8711	83.0477	199.547	ENST00000537032.1	12	-	132241510	132242592	1082	2	ENSG00000255933.1	Intronic	ENSEMBL
p13647	0.00227175	0.0110956	0.941253	83.3509	53.918	44.6436	62.3183	71.057	37.8503	ENST00000513039.2	5	+	38025798	38184034	158236	3	ENSG00000250003.2	Intergenic	ENSEMBL
p22950	2.3292e-08	0.000608559	0.941611	97.4479	175.033	119.865	136.871	131.888	100.677	TCONS_00010654	5	+	29164517	29172276	7759	4	XLOC_004325	Intergenic	HumanLincRNACatalog
p8762	0.00702492	1.37284e-06	0.941664	6483.61	3862.98	2477.55	3217.96	465.419	8392.65	ENST00000595395.1	19	+	42055887	42061832	5945	5	ENSG00000268027.1	Intergenic	ENSEMBL
p23230	2.16161e-06	0.497456	0.942211	66.9372	12.8394	99.3889	44.7645	78.801	45.2462	TCONS_00012745	6	-	53611698	53658505	46807	2	XLOC_005748	Intergenic	HumanLincRNACatalog
p14453	7.29092e-08	1.2446e-08	0.942282	66.6229	7.32633	38.2758	14.4966	33.2462	58.0049	ENST00000440848.1	6	+	2637169	2640235	3066	2	ENSG00000228718.1	Intergenic	ENSEMBL
p22218	0.00470196	3.53675e-07	0.942312	1001.84	795.579	197.023	681.1	0.463742	1197.82	TCONS_00006331	3	+	184429981	184433265	3284	2	XLOC_002951	Divergent	HumanLincRNACatalog
p24107	0.99509	5.48965e-05	0.942752	165.37	152.327	176.429	102.628	196.268	166.942	TCONS_00015245	8	+	19103236	19103881	645	2	XLOC_006731	Intergenic	HumanLincRNACatalog
p21680	2.71941e-07	9.03304e-11	0.943588	75.7192	58.9465	86.1069	29.0914	77.107	102.12	TCONS_00029212	21	+	35553026	35561387	8361	3	XLOC_013923	Intergenic	HumanLincRNACatalog
p1791	0.00333661	1.16403e-07	0.943913	61.2761	67.4551	19.6227	23.0032	81.3388	35.6911	ENST00000428178.1	10	-	131498979	131499526	547	3	ENSG00000237224.2	Intronic	ENSEMBL
p23039	1.14254e-05	0.328763	0.943949	405.573	93.2582	509.566	396.987	0.757698	554.131	TCONS_00010054	5	+	108804804	108812483	7679	3	XLOC_004502	Intergenic	HumanLincRNACatalog
p10632	7.10057e-06	2.75589e-07	0.944138	200.938	276.973	19.2861	157.358	58.1097	253.956	ENST00000448374.1	20	+	57090554	57099784	9230	4	ENSG00000231290.1	Divergent	ENSEMBL
p21730	9.64113e-11	3.01137e-08	0.944232	3164.63	170.306	4882.08	800.592	152.831	6805.35	TCONS_00029886	22	-	29227138	29227916	778	2	XLOC_014334	Intergenic	HumanLincRNACatalog
p1357	4.86157e-09	0.00235612	0.944244	83.7061	8.70185	90.7865	8.55978	80.5663	83.8542	ENST00000443636.1	1	+	209541006	209553035	12029	5	ENSG00000231648.1	Intergenic	ENSEMBL
p5288	4.13373e-12	6.92311e-10	0.944455	5171.39	2776.43	2388.33	2185.79	4416.16	3160.09	ENST00000558297.1	15	-	79529222	79576287	47065	4	ENSG00000259234.1	Antisense	ENSEMBL
p24197	0.000368711	1.73798e-08	0.944482	77.3749	3.39338	82.8326	57.4417	50.4482	46.6281	TCONS_00015327	8	+	99057942	99059896	1954	2	XLOC_006878	Divergent	HumanLincRNACatalog
p795	3.71062e-05	0.0306299	0.944586	60.7889	30.6692	93.3048	46.7621	82.8004	44.9621	ENST00000423197.1	1	+	4472110	4484747	12637	6	ENSG00000235054.1	Intergenic	ENSEMBL
p15617	0.000700805	0.0673804	0.944947	989.614	1236.65	699.04	813.801	384.497	1565.96	ENST00000521025.1	8	-	22471420	22474170	2750	1	ENSG00000253200.1	Antisense	ENSEMBL
p7642	4.96926e-07	3.48255e-11	0.945036	60.1453	1.2589	42.091	11.8501	38.5379	47.4187	ENST00000586278.1	18	-	13203772	13216366	12594	2	ENSG00000267239.1	Intergenic	ENSEMBL
p1714	0.000399567	0.460722	0.945039	88.312	2.52201	31.3545	4.20142	49.5683	61.7032	ENST00000452391.1	10	-	101411745	101413662	1917	2	ENSG00000229278.1	Intergenic	ENSEMBL
p4518	0.159708	1.81891e-06	0.945046	10990.9	2859.62	1638.4	1215.2	789.837	12632.7	ENST00000555275.1	14	-	58733606	58764840	31234	4	ENSG00000257621.2	Antisense	ENSEMBL
p5679	1.04515e-10	6.00576e-09	0.945328	313.777	132.717	461.859	229.839	78.8029	550.05	ENST00000558691.1	15	+	77934105	77941582	7477	3	ENSG00000259666.1	Intergenic	ENSEMBL
p56	1.11496e-10	1.47366e-07	0.945389	167.534	6.67675	54.8942	166.098	11.7495	38.7451	ENST00000442889.1	1	-	6843951	6844903	952	3	ENSG00000237436.1	Divergent	ENSEMBL
p5333	2.19026e-10	4.57185e-11	0.945454	99.9469	59.5903	169.402	101.452	46.9948	162.55	ENST00000558389.1	15	-	91139071	91139679	608	2	ENSG00000259212.1	Intronic	ENSEMBL
p28113	2.76246e-07	0.025931	0.945518	89.4938	97.7708	19.0676	57.8179	60.2039	77.0689	hox-HOXC6-266	12	+	52697102	52697956	854	1	hox-HOXC6-266	Antisense	HOX Loci
p9589	7.12348e-08	0.00016062	0.945556	227.332	229.611	198.944	216.078	36.0931	368.007	ENST00000434572.1	2	-	235796012	235797170	1158	2	ENSG00000235726.1	Intergenic	ENSEMBL
p2934	0.0002005	2.39918e-05	0.945864	215.362	73.082	200.3	98.693	226.57	137.023	ENST00000532168.1	11	+	112151208	112162495	11287	2	ENSG00000250303.2	Intergenic	ENSEMBL
p33713	1.40473e-08	6.04961e-06	0.946278	218.614	30.9301	184.578	161.981	181.308	67.5114	NR_073063.1	6	+	31865561	31913449	47888	14	C2	Antisense	RefSeq
p19171	2.69349e-09	1.29416e-07	0.946345	4513.26	1559.05	1717.5	1975.35	1862.68	3533.83	TCONS_00021748	13	+	32035641	32057434	21793	3	XLOC_010340	Intergenic	HumanLincRNACatalog
p24001	6.74428e-10	0.981938	0.946452	99.0579	150.966	143.853	147.893	68.0939	156.798	TCONS_00015083	8	-	91516513	91516880	367	2	XLOC_007148	Intergenic	HumanLincRNACatalog
p15731	6.69876e-09	1.2993e-08	0.946668	95.5099	139.248	134.037	152.167	69.3047	127.654	ENST00000505627.2	8	-	62671652	62678528	6876	2	ENSG00000251127.2	Intergenic	ENSEMBL
p8744	0.00167553	2.0515e-09	0.947057	78.6482	44.6152	18.4939	71.9706	15.9531	46.3284	ENST00000602255.1	19	+	39228923	39230503	1580	1	ENSG00000267892.1	Antisense	ENSEMBL
p25965	2.59737e-05	0.000101913	0.94774	110.369	81.9091	142.319	101.898	96.1507	119.062	uc002edq.3	16	-	33298267	33319211	20944	4	BC041879	Intergenic	UCSC
p27321	5.48431e-08	1.44083e-11	0.948022	81.8686	87.4904	22.7107	46.5741	65.4859	70.0264	uc.426+	18	+	23915591	23915853	262	1	uc.426+	Intronic	UCR
p5401	5.08611e-11	1.31097e-10	0.94825	51.1921	75.3739	9.03441	61.1806	8.2865	59.116	ENST00000559569.1	15	-	99936817	99941520	4703	2	ENSG00000259760.1	Intergenic	ENSEMBL
p3898	9.7726e-11	9.79185e-12	0.948288	137.581	118.351	178.835	45.4342	130.522	236.328	ENST00000506255.1	12	+	123565930	123569291	3361	3	ENSG00000251497.2	Intronic	ENSEMBL
p1485	1.0228e-10	2.3602e-07	0.948364	3752.44	4884.31	349.849	2549.66	3526.02	2446.89	ENST00000442008.2	10	-	5566938	5567705	767	2	ENSG00000256462.1	Antisense	ENSEMBL
p9376	0.36194	8.92046e-06	0.948436	138.19	178.63	30.3737	146.76	51.2942	131.237	ENST00000424322.1	2	-	154278320	154449801	171481	2	ENSG00000227400.2	Antisense	ENSEMBL
p24365	0.00308157	6.66125e-10	0.948447	170.525	33.9931	2.61832	50.5035	1.76648	144.188	TCONS_00016476	9	-	126101092	126102106	1014	2	XLOC_007848	Intergenic	HumanLincRNACatalog
p16929	9.06011e-06	2.54597e-08	0.948609	135.594	76.2686	49.3553	95.4105	78.9992	73.3843	ENST00000599172.1	9	+	131938085	131938941	856	2	ENSG00000268050.1	Antisense	ENSEMBL
p717	0.00156644	7.08248e-05	0.948663	409.714	40.6767	487.158	214.456	69.5956	605.366	ENST00000458325.1	1	-	239870423	239882419	11996	3	ENSG00000233355.2	Intronic	ENSEMBL
p29868	6.67953e-06	0.514339	0.948832	57.9797	88.9216	3.41566	45.1235	47.8315	49.6705	TCONS_00007281	3	-	150452255	150455302	3047	3	XLOC_003284	Intergenic	HumanLincRNACatalog
p17740	0.000818432	4.99203e-06	0.94902	87.6361	50.6516	74.176	94.5875	28.8421	78.2026	TCONS_00001036	1	+	94798874	94808287	9413	3	XLOC_000301	Intergenic	HumanLincRNACatalog
p25748	0.000242279	0.451396	0.949209	341.549	400.989	197.025	280.683	70.1255	541.032	uc001ius.1	10	+	29745064	29746228	1164	1	AX747507	Divergent	UCSC
p27051	0.00858119	4.81944e-08	0.94932	307.265	421.957	325.973	399.947	28.5144	573.256	uc.298-	10	-	102447657	102448016	359	1	uc.298-	Intergenic	UCR
p2421	1.15409e-06	3.59045e-06	0.949389	213.423	106.539	256.039	101.992	139.908	304.949	ENST00000531538.1	11	-	75921999	75927069	5070	3	ENSG00000255362.1	Intergenic	ENSEMBL
p10933	1.42316e-10	3.88459e-10	0.949721	212.844	41.0635	293.524	87.5093	77.3621	355.036	ENST00000442434.1	21	+	47882383	47889219	6836	4	ENSG00000223692.1	Intronic	ENSEMBL
p23761	3.27047e-06	0.000288916	0.949811	4061.11	4221.72	4435.97	3096.39	1839.12	7144.95	TCONS_00012989	7	+	30586781	30590397	3616	2	XLOC_006037	Intergenic	HumanLincRNACatalog
p33807	0.00279358	3.80248e-09	0.949861	10796.8	274.017	1011.46	1281.45	1852.11	8342.96	uc010gdr.1	20	+	29612305	29631629	19324	6	FRG1B	Intergenic	UCSC
p17976	7.80272e-10	0.00475471	0.950272	36565.1	98211.8	47181	67000.2	45893.6	60015.6	TCONS_00018545	10	-	81136764	81137298	534	2	XLOC_008866	Intergenic	HumanLincRNACatalog
p11440	4.73417e-09	4.49387e-11	0.950575	124.688	158.266	198.968	99.7277	190.434	167.941	ENST00000477210.1	3	-	106828787	106959485	130698	4	ENSG00000242759.1	Intergenic	ENSEMBL
p19617	5.07923e-05	3.78001e-09	0.951861	2756.93	4417.64	2446.96	746.996	4794.77	3616.59	TCONS_00023746	15	-	79000311	79020109	19798	2	XLOC_011540	Intergenic	HumanLincRNACatalog
p13784	0.253961	3.58498e-09	0.951956	215.41	95.74	216.87	22.7549	260.199	219.698	ENST00000502934.1	5	+	91495353	91742351	246998	5	ENSG00000250049.1	Intergenic	ENSEMBL
p2182	0.0884681	4.76682e-13	0.95209	89.8238	10.8376	89.101	88.6489	28.2966	63.7253	ENST00000526646.1	11	-	8056992	8061265	4273	2	ENSG00000254921.1	Antisense	ENSEMBL
p23082	0.350457	2.32739e-05	0.952836	412.887	593.482	703.615	549.372	632.248	447.713	TCONS_00010141	5	+	151098089	151105861	7772	2	XLOC_004606	Intergenic	HumanLincRNACatalog
p21193	0.988623	1.77835e-08	0.952911	99.9333	175.178	56.9108	58.3982	171.143	86.8471	TCONS_00003820	2	+	113436286	113438656	2370	3	XLOC_001628	Intergenic	HumanLincRNACatalog
p7946	9.18506e-05	7.47743e-12	0.95368	127.449	50.1942	148.841	39.0022	129.025	143.335	ENST00000578701.1	18	+	24445270	24770662	325392	4	ENSG00000260372.2	Antisense	ENSEMBL
p2366	3.30095e-05	0.452416	0.953761	199.693	196.414	285.351	88.4452	292.919	268.584	ENST00000527092.1	11	-	66240960	66247702	6742	4	ENSG00000255517.2	Antisense	ENSEMBL
p2100	9.52751e-08	3.02421e-05	0.954025	1038.69	887.86	14.3569	134.793	189.557	1527.33	ENST00000434792.1	10	+	106083126	106086762	3636	3	ENSG00000228261.1	Intronic	ENSEMBL
p26073	2.97546e-08	4.2188e-07	0.954125	111.813	144.746	181.589	108.999	160.959	148.089	uc002oeu.2	19	+	37288451	37294910	6459	3	LOC284408	Intergenic	UCSC
p23336	0.00523036	0.00363275	0.954261	2539	2859.36	3276.79	2067	2182.18	4029.18	TCONS_00012841	6	-	171045432	171046759	1327	2	XLOC_005951	Intergenic	HumanLincRNACatalog
p16030	1.40624e-07	1.14804e-09	0.954401	116.105	24.8739	192.034	155.81	2.58558	159.433	ENST00000530099.2	8	+	11973291	11979872	6581	2	ENSG00000255052.3	Divergent	ENSEMBL
p21234	0.0607511	0.00212314	0.954652	94.4462	194.648	47.9891	128.183	128.024	65.5905	TCONS_00003883	2	+	136846225	136869280	23055	2	XLOC_001684	Intergenic	HumanLincRNACatalog
p29120	2.42798e-10	2.31806e-09	0.955193	74.8851	82.1078	20.4017	27.7824	15.832	125.832	ENST00000558578.1	15	-	80631548	80634115	2567	3	ENSG00000259361.1	Intergenic	ENSEMBL
p9611	0.000236824	0.00060098	0.955196	340.269	289.972	393.877	12.6384	495.708	469.887	ENST00000417267.1	2	-	242694207	242695155	948	2	ENSG00000234793.1	Intronic	ENSEMBL
p14593	0.0239073	0.000270712	0.955229	224.274	119.844	234.869	152.17	162.556	238.339	ENST00000438676.1	6	+	75994729	76006283	11554	3	ENSG00000225793.1	Divergent	ENSEMBL
p11895	0.520736	0.0065611	0.955982	331.59	38.6353	410.832	136.301	272.38	337.995	ENST00000498624.1	3	+	101679229	101715376	36147	3	ENSG00000241280.1	Intergenic	ENSEMBL
p33659	1.83197e-09	7.30794e-13	0.956152	63.8205	62.9883	53.2227	2.23478	80.3387	89.5639	NR_046332.1	11	+	1431672	1483919	52247	20	BRSK2	Antisense	RefSeq
p28667	0.0011335	5.524e-08	0.956342	93.2232	113.52	182.914	159.25	127.068	86.3264	ASO3932	None	None	None	None	#VALUE!	None	ASO3932	Intronic	RNAdb
p4134	3.84217e-10	0.182239	0.956589	397.57	756.234	536.907	487.8	401.473	728.042	ENST00000425483.1	13	-	114583504	114584459	955	2	ENSG00000226921.1	Intergenic	ENSEMBL
p12419	6.04354e-09	0.00147633	0.9569	49.3753	23.3052	71.1106	48.0415	67.7588	21.7935	ENST00000503597.1	4	-	117411231	117412356	1125	2	ENSG00000250791.1	Intergenic	ENSEMBL
p24272	4.18274e-07	3.20452e-06	0.957249	136.798	164.047	79.8773	157.347	20.5804	186.518	TCONS_00016269	9	-	11143875	11194381	50506	4	XLOC_007645	Intergenic	HumanLincRNACatalog
p24500	0.00231979	0.293821	0.957409	127.575	6.43658	196.326	192.643	9.40367	114.221	TCONS_00016096	9	+	102293803	102299385	5582	3	XLOC_007488	Intergenic	HumanLincRNACatalog
p20707	0.167602	1.15396e-06	0.95797	58.7138	34.5089	38.6438	10.428	96.3666	19.5296	TCONS_00027004	19	+	35704059	35706780	2721	2	XLOC_013049	Intergenic	HumanLincRNACatalog
p7122	9.80706e-07	2.20489e-12	0.958143	102.779	190.971	98.5104	177.445	1.04467	197.352	ENST00000571815.1	17	+	1992974	2004854	11880	2	ENSG00000262810.1	Intronic	ENSEMBL
p3256	0.00126326	6.49609e-10	0.95887	66.6828	50.3325	57.7337	39.101	92.4408	36.0197	ENST00000543387.1	12	-	67834777	67836339	1562	2	ENSG00000256172.1	Intergenic	ENSEMBL
p16014	0.0760057	2.25558e-10	0.959279	216.064	264.48	187.404	78.4966	294.581	267.671	ENST00000520017.1	8	+	8998933	9002945	4012	3	ENSG00000254340.1	Antisense	ENSEMBL
p27854	3.02551e-08	1.11543e-11	0.959371	287.283	371.299	326.92	422.233	150.952	372.278	uc.470+	X	+	25401215	25401556	341	1	uc.470+	Intergenic	UCR
p1497	9.27553e-07	0.0131848	0.959449	1323.23	1344.73	424.946	49.9976	414.061	2503.43	ENST00000419836.1	10	-	9800745	9801200	455	2	ENSG00000228636.1	Intergenic	ENSEMBL
p4034	4.00388e-09	1.62346e-05	0.959761	87.3196	77.5143	31.4484	50.1189	42.756	95.5092	ENST00000566370.1	13	-	46870579	46871979	1400	1	ENSG00000261097.1	Intergenic	ENSEMBL
p13826	0.00944086	0.0136244	0.959793	167.636	70.6558	134.762	61.9023	86.7307	209.422	ENST00000504004.1	5	+	111563979	111593006	29027	4	ENSG00000251076.1	Antisense	ENSEMBL
p6041	0.00023246	5.20866e-10	0.959882	60.235	14.4306	96.982	27.5449	89.0964	48.1202	ENST00000565441.1	16	-	56217637	56220218	2581	2	ENSG00000261013.1	Intergenic	ENSEMBL
p7268	3.3435e-10	2.72726e-06	0.960197	3895.82	3254.99	2875.5	3359.88	3496.8	2770.55	ENST00000583787.1	17	+	26960223	26961758	1535	3	ENSG00000264044.1	Antisense	ENSEMBL
p349	0.0851084	0.938234	0.96046	107.873	155.023	5.40751	15.5305	131.22	110.944	ENST00000421943.1	1	-	113236309	113239243	2934	3	ENSG00000225075.1	Antisense	ENSEMBL
p15355	0.00501724	0.0539362	0.960736	94.0744	85.9152	115.075	55.428	159.567	68.4848	ENST00000450544.1	7	+	63361200	63378372	17172	4	ENSG00000226581.1	Intergenic	ENSEMBL
p3456	9.98355e-06	5.39521e-07	0.961053	92.5291	165.971	128.459	148.209	123.968	99.7111	ENST00000536330.1	12	-	127759011	127768828	9817	4	ENSG00000256292.1	Intergenic	ENSEMBL
p7631	1.96067e-09	4.7843e-11	0.961374	112.341	103.966	82.3965	100.164	65.5362	121.466	ENST00000586453.1	18	-	11810404	11811483	1079	2	ENSG00000267455.1	Intronic	ENSEMBL
p23459	9.71426e-10	0.00201802	0.96237	295.438	405.611	318.341	118.352	133.605	729.074	TCONS_00011845	6	+	58182219	58187271	5052	2	XLOC_005332	Intergenic	HumanLincRNACatalog
p22290	1.50607e-10	0.000927785	0.962964	204.269	277.764	273.19	237.714	212.013	277.526	TCONS_00007730	4	-	25866802	25867423	621	2	XLOC_003911	Intergenic	HumanLincRNACatalog
p20578	0.00123064	9.5682e-08	0.963443	96.8471	27.1442	178.251	44.4455	150.035	96.7131	TCONS_00026651	18	+	74242367	74270086	27719	2	XLOC_012726	Intergenic	HumanLincRNACatalog
p22479	0.000340546	0.0333902	0.963769	81.2359	84.9303	34.6547	4.06531	82.6972	106.782	TCONS_00008035	4	+	32226644	32230663	4019	3	XLOC_003498	Intergenic	HumanLincRNACatalog
p26064	6.14392e-07	2.18469e-08	0.964306	226.569	257.383	34.1237	33.4074	134.431	331.745	uc021upf.1	19	+	11348125	11348957	832	2	UNQ599/PRO1185	Antisense	UCSC
p19475	0.75503	2.89544e-12	0.964377	103.436	58.8759	131.992	95.2093	107.667	80.9438	TCONS_00022548	14	+	71148353	71166840	18487	2	XLOC_010866	Intergenic	HumanLincRNACatalog
p27986	1.05574e-09	0.000184117	0.964494	65.3822	21.5269	52.1205	28.7025	31.1469	74.2439	nc-HOXB4-167	17	+	44011228	44011577	349	1	nc-HOXB4-167	Intronic	HOX Loci
p28807	0.178299	2.75124e-09	0.964663	1119.18	462.17	1009.05	43.309	1284.26	1171.29	LIT3484	None	None	None	None	#VALUE!	None	LIT3484	Antisense	RNAdb
p11735	2.02929e-06	0.3053	0.964958	1348.35	138.053	780.526	703.146	802.329	682.019	ENST00000593741.1	3	+	18505821	18571886	66065	6	ENSG00000228956.3	Intergenic	ENSEMBL
p8320	1.93485e-05	1.25561e-12	0.96521	61.059	75.8639	32.0412	57.7743	43.4695	61.8421	ENST00000585356.1	19	-	36803968	36822609	18641	6	ENSG00000232677.2	Intergenic	ENSEMBL
p8199	0.212892	2.72801e-09	0.965735	221.963	48.6049	61.8087	37.413	64.8352	218.74	ENST00000591038.1	19	-	16297086	16300269	3183	2	ENSG00000267033.1	Intronic	ENSEMBL
p1397	7.60168e-07	0.0744934	0.966977	116.417	189.634	8.59306	154.97	23.7682	125.515	ENST00000441835.1	1	+	222763166	222765828	2662	2	ENSG00000225265.1	Antisense	ENSEMBL
p7910	0.000328591	1.24766e-09	0.967018	66.4631	84.2864	18.6929	14.1526	87.5072	62.1939	ENST00000591853.1	18	+	12081538	12085266	3728	3	ENSG00000267722.1	Intergenic	ENSEMBL
p21139	6.16847e-08	6.19453e-09	0.967253	85.7979	57.4975	65.4109	36.4414	65.9286	99.5017	TCONS_00002704	2	+	66305393	66311772	6379	3	XLOC_001506	Intergenic	HumanLincRNACatalog
p28721	1.8518e-06	2.98979e-05	0.967322	107.575	172.261	34.5622	142.329	16.7752	145.019	LIT2214	None	None	None	None	#VALUE!	None	LIT2214	Antisense	RNAdb
p1155	5.55129e-07	4.60788e-14	0.967969	291.763	478.268	493.161	93.923	403.102	725.706	ENST00000424820.1	1	+	143347957	143365041	17084	7	ENSG00000242569.1	Intergenic	ENSEMBL
p12707	0.709389	3.08208e-05	0.96805	1336.31	762.477	1072.21	873.694	860.811	1335.18	ENST00000441504.1	4	+	53578664	53579296	632	2	ENSG00000226950.2	Intergenic	ENSEMBL
p1912	1.86322e-11	4.10462e-05	0.968578	1220.15	256.5	825.451	1228.08	250.237	751.449	ENST00000426283.1	10	+	36727543	36728725	1182	2	ENSG00000237002.1	Intergenic	ENSEMBL
p4316	1.93485e-05	4.66917e-06	0.968633	89.4676	16.2737	87.073	76.1261	14.2577	96.3825	ENST00000444795.1	13	+	104077549	104080035	2486	2	ENSG00000234551.1	Intergenic	ENSEMBL
p10684	2.28735e-05	3.41597e-15	0.968935	319.458	417.437	341.971	119.107	492.994	433.25	ENST00000443479.1	21	-	21265592	21272069	6477	3	ENSG00000233480.1	Intergenic	ENSEMBL
p16253	0.0218436	5.31565e-06	0.969041	228.066	73.1152	297.038	117.332	144.066	318.302	ENST00000521953.1	8	+	82066564	82076834	10270	3	ENSG00000253214.1	Intergenic	ENSEMBL
p28430	8.77041e-05	2.71683e-07	0.969149	106.362	167.927	40.1166	56.31	82.0086	166.387	ASO3668	None	None	None	None	#VALUE!	None	ASO3668	Antisense	RNAdb
p10401	0.000413402	9.81805e-14	0.969341	75.6235	11.9791	88.0634	38.2162	85.0925	46.9715	ENST00000601850.1	20	-	26168267	26180161	11894	4	ENSG00000227195.2	Intergenic	ENSEMBL
p9710	0.128663	0.00171312	0.969456	203.158	260.931	131.535	202.092	255.933	119.406	ENST00000434897.1	2	+	25194994	25262563	67569	3	ENSG00000224165.1	Divergent	ENSEMBL
p5283	1.90192e-10	0.000154919	0.969652	204.447	296.829	147.481	98.4584	188.92	341.691	ENST00000560872.1	15	-	79484048	79576167	92119	2	ENSG00000259234.1	Antisense	ENSEMBL
p10674	2.70638e-08	8.79319e-14	0.969698	84.8655	76.7763	47.245	12.306	92.7434	97.5076	ENST00000430064.1	21	-	18235194	18246011	10817	4	ENSG00000232886.1	Intergenic	ENSEMBL
p26349	1.89601e-06	9.74518e-07	0.969741	98.1981	119.861	125.321	22.0856	171.784	139.121	uc003qxa.1	6	-	170060912	170063234	2322	1	AK128656	Antisense	UCSC
p11109	1.84332e-11	4.36522e-06	0.970039	3464.6	4583.48	1792.75	1232.05	1814.94	6498.99	ENST00000412149.1	22	+	22648097	22649159	1062	2	ENSG00000234630.1	Intergenic	ENSEMBL
p22639	1.68812e-05	1.70732e-06	0.970173	97.2189	172.126	108.328	85.1915	173.177	108.04	TCONS_00008378	4	+	189081180	189082222	1042	3	XLOC_003832	Intergenic	HumanLincRNACatalog
p2856	3.32021e-09	9.36583e-06	0.970675	137.533	110.828	88.3708	141.695	0.937267	184.225	ENST00000527012.1	11	+	77561649	77562557	908	2	ENSG00000254691.1	Intronic	ENSEMBL
p6291	3.28603e-10	3.57954e-14	0.971706	116.729	141.734	76.6418	129.931	55.6993	139.993	ENST00000570945.1	16	+	14396144	14420210	24066	2	ENSG00000262454.1	Intergenic	ENSEMBL
p7480	1.01717e-10	7.26902e-07	0.972975	1019.26	874.339	1195.49	682.152	547.116	1776.34	ENST00000585484.1	17	+	66624294	66675747	51453	5	ENSG00000267659.1	Intergenic	ENSEMBL
p21473	5.72423e-09	2.02399e-06	0.973164	102.251	14.5971	184.955	94.5038	51.8596	147.34	TCONS_00028463	20	-	61405256	61408237	2981	3	XLOC_013837	Intergenic	HumanLincRNACatalog
p22257	0.276808	9.75063e-06	0.973285	678.387	578.538	872.677	278.973	988.886	804.851	TCONS_00009007	4	-	1573435	1582249	8814	2	XLOC_003853	Intergenic	HumanLincRNACatalog
p29078	0.0552729	0.369653	0.97358	200.433	259.014	142.112	31.7722	226.131	327.763	ENST00000602918.1	12	+	123848414	123850334	1920	1	ENSG00000256092.2	Intergenic	ENSEMBL
p11385	1.13413e-05	9.31605e-07	0.973647	1011.03	1331.28	283.469	293	892.921	1370.66	ENST00000472761.1	3	-	52330672	52332930	2258	2	ENSG00000242797.1	Intergenic	ENSEMBL
p10394	0.000524541	7.59535e-10	0.973751	81.6281	29.3499	91.2182	56.6803	49.0232	91.1853	ENST00000450971.1	20	-	23635861	23637027	1166	2	ENSG00000225056.1	Intergenic	ENSEMBL
p29694	0.00164726	5.84935e-08	0.97405	74.2846	36.5838	72.6241	76.8842	59.7866	42.0601	TCONS_00023210	15	-	100884661	100890923	6262	2	XLOC_011609	Intergenic	HumanLincRNACatalog
p6300	0.00010017	2.87146e-09	0.974058	195.871	230.508	207.588	70.7979	288.546	258.176	ENST00000573856.1	16	+	15978885	15980015	1130	2	ENSG00000262171.1	Intronic	ENSEMBL
p30300	2.53835e-06	8.13182e-13	0.974283	1429.34	350.454	1275.55	1196.33	618.668	1161.78	ASO3903	None	None	None	None	#VALUE!	None	ASO3903	Antisense	RNAdb
p8081	0.000614184	2.01791e-07	0.974566	210.362	264.97	109.157	145.665	151.158	272.799	ENST00000583889.1	18	+	74688897	74690817	1920	2	ENSG00000266844.1	Antisense	ENSEMBL
p10308	0.719318	6.765e-07	0.974643	340.833	178.478	324.002	90.9299	382.171	348.828	ENST00000446029.1	2	+	240547391	240552533	5142	2	ENSG00000227459.1	Intergenic	ENSEMBL
p27163	5.54803e-13	0.0294966	0.974836	1024.2	852.663	278.562	256.921	4.64391	1839.62	uc.352-	13	-	72694164	72694364	200	1	uc.352-	Intergenic	UCR
p15865	0.0034736	1.24298e-12	0.974839	60.3093	53.3448	61.3422	40.3707	97.2746	32.9479	ENST00000521102.1	8	-	104169217	104184255	15038	3	ENSG00000247081.3	Intronic	ENSEMBL
p5548	2.65211e-10	8.94066e-10	0.975069	222.025	30.421	230.43	73.648	68.0594	329.13	ENST00000560705.1	15	+	45997275	46141083	143808	5	ENSG00000259200.1	Intergenic	ENSEMBL
p3566	2.90814e-09	4.42687e-11	0.975401	118.497	104.023	33.126	9.75852	77.5933	162.006	ENST00000543515.1	12	+	13080691	13133309	52618	3	ENSG00000247498.3	Antisense	ENSEMBL
p20893	1.73885e-07	1.09034e-09	0.976194	76.9688	38.5065	71.9227	33.58	58.1487	91.2081	TCONS_00005220	2	-	105424032	105461633	37601	4	XLOC_002241	Intergenic	HumanLincRNACatalog
p21523	0.00423958	5.67603e-14	0.976464	222.596	140.017	255.993	201.332	151.842	250.873	TCONS_00028516	20	+	22666306	22671142	4836	2	XLOC_013486	Intergenic	HumanLincRNACatalog
p16623	0.816159	1.32147e-07	0.976608	136.963	125.154	183.697	154.301	186.773	94.3113	ENST00000451449.2	9	-	129351872	129375979	24107	3	ENSG00000224842.2	Divergent	ENSEMBL
p19048	0.340006	7.90403e-06	0.976622	219.934	221.431	172.56	204.385	218.083	177.105	TCONS_00021656	13	-	53263721	53274883	11162	2	XLOC_010622	Intergenic	HumanLincRNACatalog
p20363	0.000456034	5.67362e-12	0.976765	63.9477	69.7027	23.8561	93.2347	36.7273	23.8848	TCONS_00025520	17	+	77791521	77793387	1866	2	XLOC_012333	Intergenic	HumanLincRNACatalog
p19133	5.5369e-05	3.94992e-12	0.976777	1144.58	703.414	467.649	91.9762	370.325	1799.56	TCONS_00022128	13	-	113804992	113807530	2538	2	XLOC_010736	Intergenic	HumanLincRNACatalog
p19350	1.21852e-09	3.83005e-07	0.976852	66.6814	46.4538	98.3301	42.0451	95.5314	68.9937	TCONS_00022805	14	-	78122342	78123921	1579	2	XLOC_011082	Intergenic	HumanLincRNACatalog
p23167	0.0428788	1.91713e-05	0.976976	1278.69	383.302	1437.11	1076.15	704.716	1246.89	TCONS_00011443	6	-	6758510	6759524	1014	2	XLOC_005596	Intergenic	HumanLincRNACatalog
p26021	3.49012e-09	0.0467481	0.977422	6092.31	992.721	3385.85	3190.17	1801.92	5242.38	uc010cqz.3	17	+	20328041	20334521	6480	5	AK310665	Intergenic	UCSC
p23081	0.00836793	0.00194802	0.977607	135.904	144.974	29.073	133.049	44.3582	125.603	TCONS_00010140	5	+	149810791	149821794	11003	2	XLOC_004603	Intergenic	HumanLincRNACatalog
p29180	0.241324	3.91799e-11	0.977656	1235.23	996.25	410.446	795.703	412.424	1374.76	ENST00000573167.1	17	-	79003501	79008501	5000	2	ENSG00000226137.3	Divergent	ENSEMBL
p17275	6.37931e-05	8.0507e-10	0.978695	46.2971	0.919004	24.8565	37.6977	6.57245	26.2669	ENST00000438239.1	X	+	152617486	152625568	8082	3	ENSG00000243768.1	Antisense	ENSEMBL
p21658	5.19968e-05	2.47636e-05	0.978718	46.2945	41.9145	78.2598	87.7095	50.3597	24.8568	TCONS_00028965	21	+	11169665	11172046	2381	2	XLOC_013856	Intergenic	HumanLincRNACatalog
p6428	9.67677e-11	2.74573e-11	0.978894	216.813	51.5229	280.58	238.884	246.829	51.6177	ENST00000557953.1	16	+	54273604	54274566	962	2	ENSG00000259759.1	Intergenic	ENSEMBL
p18037	1.5875e-06	0.0362282	0.978998	1026.49	647.93	1376.21	250.871	1262.98	1472.71	TCONS_00018082	10	+	995366	998124	2758	2	XLOC_008337	Intergenic	HumanLincRNACatalog
p27587	9.44869e-06	0.000333251	0.979058	107.611	77.4564	87.1728	111.662	21.7467	133.131	uc.166-	5	-	87961804	87962114	310	1	uc.166-	Intergenic	UCR
p8330	0.0103401	6.51081e-12	0.979097	1435.37	280.674	686.134	479.334	662.017	1210.61	ENST00000587645.1	19	-	37619580	37632542	12962	3	ENSG00000267437.1	Antisense	ENSEMBL
p3251	0.000435872	0.00179152	0.979436	2536.99	3410.52	1875.35	1283.99	3939.45	2438.53	ENST00000536412.1	12	-	66645524	66651214	5690	4	ENSG00000256072.1	Antisense	ENSEMBL
p26373	1.73083e-07	0.860371	0.979565	61.2847	9.37654	79.2448	74.1655	9.44043	63.2367	uc003ppu.3	6	+	99872797	99875596	2799	1	DQ599242	Antisense	UCSC
p24908	1.04716e-08	0.00122438	0.979599	398.985	706.693	505.858	676.12	742.292	160.245	NR_028408.1	12	-	46119502	46121704	2202	1	LOC400027	Intergenic	RefSeq
p30013	5.48472e-12	0.00178399	0.979881	86.1553	28.3286	77.7817	55.2829	9.79424	123.32	TCONS_00016901	9	-	139158250	139166849	8599	5	XLOC_007895	Intergenic	HumanLincRNACatalog
p19396	0.452499	8.62185e-09	0.980047	334.477	287.32	344.671	346.643	266.912	333.63	TCONS_00023178	14	-	105536958	105539070	2112	2	XLOC_011152	Intergenic	HumanLincRNACatalog
p12132	8.8168e-10	2.78126e-10	0.98007	93.5123	20.5701	174.59	112.495	50.9687	119.456	ENST00000593549.1	3	+	181417382	181457618	40236	4	ENSG00000242808.2	Antisense	ENSEMBL
p21921	2.62421e-09	1.58639e-07	0.980186	689.197	893.298	682.288	757.195	316.97	1145.74	TCONS_00006634	3	-	126006729	126011709	4980	3	XLOC_003235	Intergenic	HumanLincRNACatalog
p7443	0.723645	5.26602e-10	0.980303	4861.1	4484.63	2512.67	3151.79	2847.27	5625.76	ENST00000579527.1	17	+	56402810	56430647	27837	5	ENSG00000265148.1	Antisense	ENSEMBL
p18812	2.57478e-06	4.85589e-06	0.980622	125.303	127.301	24.8464	52.1553	85.2906	134.627	TCONS_00021089	12	+	28724087	28726463	2376	2	XLOC_009695	Intergenic	HumanLincRNACatalog
p17044	0.101399	9.43877e-15	0.981276	296.652	403.868	142.649	205.975	351.418	269.988	ENST00000602420.1	X	-	73289192	73513307	224115	5	ENSG00000230590.2	Intergenic	ENSEMBL
p17326	1.0804e-10	1.58753e-17	0.981347	166.506	121.169	199.609	75.5917	110.855	291.748	ENST00000453955.1	Y	+	8572512	8573324	812	2	ENSG00000232419.1	Intergenic	ENSEMBL
p5591	7.1062e-08	3.18457e-07	0.982196	205.588	189.544	283.774	171.153	234.468	261.198	ENST00000452467.1	15	+	59182165	59186281	4116	2	ENSG00000225798.1	Antisense	ENSEMBL
p3579	0.739087	6.15816e-06	0.982477	1259.11	1210.06	693.217	575.786	796.461	1734.73	ENST00000542401.1	12	+	14720924	14772689	51765	5	ENSG00000256751.1	Antisense	ENSEMBL
p2474	8.53877e-08	2.52436e-07	0.982916	64.1074	84.7825	14.2841	87.584	8.8012	64.0011	ENST00000526310.1	11	-	102100581	102101653	1072	2	ENSG00000254422.1	Antisense	ENSEMBL
p17080	1.89317e-09	3.99133e-07	0.983256	118.018	162.362	140.488	152.41	107.029	154.382	ENST00000451431.1	X	-	130115563	130173820	58257	2	ENSG00000228659.1	Intergenic	ENSEMBL
p20908	4.97731e-07	1.52063e-12	0.983305	81.9325	78.8117	42.8501	42.0788	82.364	75.7523	TCONS_00004379	2	-	111099474	111103519	4045	2	XLOC_002264	Intergenic	HumanLincRNACatalog
p6859	0.0130369	1.13151e-12	0.983357	210.323	209.391	221.133	297.288	102.778	230.115	ENST00000586376.1	17	-	43268297	43299132	30835	3	ENSG00000267121.1	Divergent	ENSEMBL
p11809	0.749128	9.09268e-11	0.983537	65.9999	53.3671	47.5431	94.561	31.5262	38.075	ENST00000478366.1	3	+	52857950	52859330	1380	3	ENSG00000239799.1	Antisense	ENSEMBL
p1210	0.470382	0.334348	0.983908	610.956	660.001	512.117	121.793	916.791	715.797	ENST00000434182.1	1	+	151814352	151822861	8509	3	ENSG00000234614.1	Antisense	ENSEMBL
p16153	9.62637e-11	1.25016e-06	0.98391	108.057	62.1051	187.474	187.14	4.37591	160.366	ENST00000521660.1	8	+	49533024	49536455	3431	2	ENSG00000253455.1	Intergenic	ENSEMBL
p28551	2.96752e-06	9.56984e-14	0.984296	715.635	965.223	588.251	194.19	527.646	1511.64	ASO2039	None	None	None	None	#VALUE!	None	ASO2039	Antisense	RNAdb
p615	7.5139e-06	2.46281e-12	0.984378	7462.23	2307.31	2286.34	3614.05	1122.58	7130.91	ENST00000597497.1	1	-	207726067	207779900	53833	4	ENSG00000236911.2	Antisense	ENSEMBL
p19641	3.01597e-09	1.47233e-05	0.985535	3016.32	3055.49	3456.69	3556.95	811.094	5022.62	TCONS_00023779	15	-	90064941	90067256	2315	2	XLOC_011573	Intergenic	HumanLincRNACatalog
p6407	0.558268	1.16556e-11	0.985841	82.4297	19.0653	68.1553	17.7262	71.9527	77.5694	ENST00000602304.1	16	+	50746754	50747500	746	1	ENSG00000270120.1	Intronic	ENSEMBL
p26447	0.303938	5.41119e-08	0.985986	682.726	360.348	876.295	127.535	637.626	1127.31	uc010loj.2	7	+	142364571	142499111	134540	3	TCRVB	Antisense	UCSC
p2561	2.67987e-09	0.00176362	0.986005	403.621	678.48	417.12	395.211	487.145	595.885	ENST00000531241.1	11	-	124614529	124616233	1704	3	ENSG00000255045.1	Antisense	ENSEMBL
p22722	2.26074e-05	2.79499e-06	0.986221	98.0616	18.1567	80.5232	16.8968	90.6503	86.4834	TCONS_00010345	5	-	55830960	55832351	1391	2	XLOC_004831	Intergenic	HumanLincRNACatalog
p21712	1.05658e-07	6.75209e-12	0.986294	74.8008	90.6222	2.20867	24.6923	48.2033	92.4386	TCONS_00029055	21	+	46222007	46224012	2005	2	XLOC_013973	Divergent	HumanLincRNACatalog
p29067	9.69688e-11	0.73867	0.98643	169.507	54.5259	191.967	24.5436	35.0729	350.739	ENST00000542980.1	12	-	131474682	131478521	3839	3	ENSG00000256151.1	Antisense	ENSEMBL
p9284	2.14098e-08	5.40818e-10	0.986445	78.5956	19.7315	78.5698	0.210276	71.3737	102.915	ENST00000376593.2	2	-	111855921	111871762	15841	3	ENSG00000204581.2	Intronic	ENSEMBL
p26674	2.27977e-05	6.84936e-15	0.986793	84.933	28.8695	0.732008	10.4878	34.8994	67.6346	HIT000320908	14	-	50329253	50329627	374	1	HIX0038048	Intergenic	H-InvDB
p20149	0.00234908	5.04843e-06	0.987126	204.64	171.239	219.76	194.541	152.813	240.617	TCONS_00025602	17	-	27337874	27339680	1806	2	XLOC_012430	Intergenic	HumanLincRNACatalog
p3838	0.598183	0.00101205	0.987167	93.9498	158.251	110.043	177.292	113.133	67.171	ENST00000546714.1	12	+	108130365	108153745	23380	5	ENSG00000258136.1	Antisense	ENSEMBL
p6562	1.90557e-11	2.16729e-05	0.987749	135.155	148.699	82.0287	62.4643	101.441	197.496	ENST00000599486.1	16	+	86320032	86326995	6963	3	ENSG00000268532.1	Intergenic	ENSEMBL
p26678	2.78893e-10	7.65941e-05	0.987779	77.5894	11.9648	76.3855	53.4064	12.4143	98.091	HIT000389501	14	-	105349762	105350498	736	2	HIX0172398	Antisense	H-InvDB
p23555	0.0136976	0.000107869	0.988178	87.9441	12.0257	70.7796	45.8188	11.8903	111.022	TCONS_00012614	6	+	144606290	144609320	3030	2	XLOC_005492	Intergenic	HumanLincRNACatalog
p15157	0.0228777	0.0525003	0.988333	323.031	13.0455	250.256	255.888	41.4447	282.158	ENST00000461019.1	7	-	149564860	149570934	6074	4	ENSG00000204934.6	Antisense	ENSEMBL
p19945	5.38132e-12	7.57979e-06	0.988722	103.344	169.357	199.468	193.815	129.041	143.987	TCONS_00024743	16	-	82578751	82609064	30313	3	XLOC_012025	Intergenic	HumanLincRNACatalog
p25832	5.54373e-06	6.25547e-07	0.988739	169.209	82.0229	3.76888	18.3542	47.3493	186.425	uc009zdx.1	12	+	2229490	2229863	373	1	AK308652	Antisense	UCSC
p18395	2.43578e-07	4.40009e-05	0.98901	113.44	193.276	55.6873	145.168	94.5698	118.683	TCONS_00020154	11	-	130270904	130271852	948	2	XLOC_009604	Intergenic	HumanLincRNACatalog
p21542	6.07579e-07	2.2437e-11	0.989181	688.257	356.443	709.059	234.639	585.674	914.471	TCONS_00028556	20	+	46579553	46582691	3138	3	XLOC_013544	Intergenic	HumanLincRNACatalog
p33346	4.68952e-09	0.147845	0.989323	115.049	161.603	25.7326	183.475	90.1147	25.5663	ENST00000507727.1	1	-	95448744	95492759	44015	3	ENSG00000250094.1	Antisense	ENSEMBL
p4153	9.19939e-05	1.05821e-09	0.989549	126.428	168.323	197.366	150.636	187.96	148.378	ENST00000424756.1	13	+	21872277	21878694	6417	3	ENSG00000244054.1	Intergenic	ENSEMBL
p28526	0.0121613	8.65554e-11	0.989725	195.982	197.693	85.9286	118.021	125.215	231.439	ASO1698	None	None	None	None	#VALUE!	None	ASO1698	Intergenic	RNAdb
p7264	3.42621e-05	2.45995e-06	0.989732	100.8	65.6163	144.724	39.0259	182.135	86.7849	ENST00000556050.1	17	+	26926150	26933928	7778	3	ENSG00000227543.3	Divergent	ENSEMBL
p4875	0.555388	7.95398e-05	0.989983	97.4327	33.3772	130.707	83.732	122.548	52.6177	ENST00000554032.1	14	+	71276921	71282108	5187	2	ENSG00000259153.1	Intergenic	ENSEMBL
p6717	1.58475e-09	1.34892e-07	0.990172	88.2009	97.058	58.7682	88.4618	50.5096	102.657	ENST00000583062.1	17	-	18079878	18088067	8189	2	ENSG00000266677.1	Antisense	ENSEMBL
p117	0.224925	2.45977e-21	0.99026	767.738	264.298	959.956	319.781	958.454	694.356	ENST00000442055.1	1	-	26143239	26146263	3024	4	ENSG00000228172.1	Antisense	ENSEMBL
p18570	1.9369e-10	2.93001e-05	0.990284	93.5345	128.833	158.836	194.517	83.2096	99.7732	TCONS_00019544	11	+	133913045	133914138	1093	2	XLOC_009342	Intergenic	HumanLincRNACatalog
p11208	0.254431	3.25046e-12	0.990348	767.767	168.797	932.218	432.556	330.442	1087.75	ENST00000416406.1	22	+	39135007	39145046	10039	2	ENSG00000225450.1	Antisense	ENSEMBL
p22619	9.62898e-11	8.05305e-06	0.990507	114.99	91.3698	108.063	76.3008	56.1627	178.974	TCONS_00008357	4	+	184687062	184688453	1391	2	XLOC_003804	Intergenic	HumanLincRNACatalog
p3345	0.109202	9.71657e-06	0.990517	93.1001	56.9379	106.35	130.428	63.5732	59.9554	ENST00000549036.1	12	-	101432197	101432872	675	2	ENSG00000258007.1	Intronic	ENSEMBL
p6865	1.75314e-07	0.000747541	0.990612	1174.24	494.347	1038.94	1191.6	653.727	836.788	ENST00000589518.1	17	-	43324633	43325210	577	2	ENSG00000233483.2	Antisense	ENSEMBL
p19718	9.00251e-09	0.000427636	0.990984	94.8709	138.978	118.147	120.714	132.036	96.0709	TCONS_00023323	15	+	26111018	26122343	11325	2	XLOC_011188	Intergenic	HumanLincRNACatalog
p33820	0.968763	1.99685e-05	0.99146	1013.12	1159.85	1136.91	1014.36	1337.76	929.502	uc021yjh.1	5	-	179264275	179267825	3550	1	AK095057	Antisense	UCSC
p4284	4.42487e-05	1.29222e-05	0.99149	83.3662	33.0631	81.7476	76.9949	26.0042	93.4912	ENST00000427918.1	13	+	80446720	80492079	45359	6	ENSG00000229175.1	Intergenic	ENSEMBL
p12112	0.000262289	7.94144e-07	0.991539	49.7081	23.3052	71.1106	48.0415	67.7588	27.1042	ENST00000461063.2	3	+	180707568	180893607	186039	4	ENSG00000242808.2	Divergent	ENSEMBL
p6315	1.1571e-07	2.04246e-11	0.99228	85.5394	81.1942	66.4821	45.1125	77.5226	108.78	ENST00000575612.1	16	+	21132078	21141429	9351	3	ENSG00000263331.1	Antisense	ENSEMBL
p29890	8.67004e-07	0.147481	0.992385	97.5746	130.74	82.3544	123.91	96.943	87.4506	TCONS_00008603	4	-	145122622	145134247	11625	3	XLOC_004108	Intergenic	HumanLincRNACatalog
p17214	0.0378996	1.81407e-16	0.992424	196.18	160.971	272.31	295.464	160.637	168.592	ENST00000431616.1	X	+	102024088	102139094	115006	5	ENSG00000223546.2	Intergenic	ENSEMBL
p30183	1.95597e-09	0.0340135	0.992437	50.6047	64.3056	1.75214	39.8706	46.9916	28.9179	uc001hpx.3	1	+	226271655	226277994	6339	4	BC032899	Intergenic	UCSC
p14489	1.94065e-11	0.711029	0.992635	40.3882	19.2816	51.1457	48.296	37.7397	23.9636	ENST00000567753.1	6	+	22221009	22222624	1615	1	ENSG00000261568.1	Intergenic	ENSEMBL
p27916	0.000685712	0.327187	0.992932	106.951	164.97	61.8397	140.69	90.0963	100.615	hox-HOXB9-90	17	+	44053567	44053836	269	1	hox-HOXB9-90	Intronic	HOX Loci
p603	2.06492e-08	0.000478079	0.992947	1077.45	832.817	835.552	202.604	808.842	1715.01	ENST00000421449.1	1	-	201785981	201798346	12365	3	ENSG00000231871.1	Antisense	ENSEMBL
p16901	0.964908	0.00642589	0.993231	703.522	836.378	656.444	791.193	528.993	861.291	ENST00000447891.1	9	+	123607151	123616651	9500	3	ENSG00000226752.2	Intergenic	ENSEMBL
p927	3.14291e-06	0.229398	0.993326	84.4665	88.3967	48.077	51.1072	90.1503	78.208	ENST00000452785.1	1	+	46599042	46604753	5711	3	ENSG00000227857.1	Divergent	ENSEMBL
p24280	0.555023	0.000158459	0.993905	308.827	149.772	381.112	469.5	124.747	240.347	TCONS_00016750	9	-	29197834	29213394	15560	2	XLOC_007662	Antisense	HumanLincRNACatalog
p6696	7.04721e-06	2.31928e-11	0.993916	77.7627	38.9382	26.3157	1.94904	79.3776	60.8198	ENST00000453339.2	17	-	15179878	15182794	2916	3	ENSG00000237377.2	Intergenic	ENSEMBL
p1413	8.79001e-05	0.224742	0.994157	95.3459	80.0119	41.1569	30.9005	82.0092	102.34	ENST00000440540.1	1	+	226335703	226342772	7069	2	ENSG00000234478.1	Antisense	ENSEMBL
p12974	1.57073e-05	0.237114	0.994245	64.9212	11.4496	40.8859	11.2641	48.9733	56.3446	ENST00000512831.1	4	+	163661819	163663200	1381	2	ENSG00000248431.1	Intergenic	ENSEMBL
p10964	1.54012e-10	5.00944e-06	0.994433	73.9901	49.9853	92.2131	35.4091	57.8067	121.769	ENST00000427813.2	22	-	24834243	24891042	56799	8	ENSG00000178803.6	Antisense	ENSEMBL
p29299	0.0233843	8.70374e-06	0.994562	3282.15	3170.9	1965.69	3317.58	850.256	4205.12	ENST00000425497.1	20	+	48884022	48896332	12310	4	ENSG00000224397.1	Antisense	ENSEMBL
p12149	1.80978e-09	0.0568783	0.994775	65.9396	32.3438	44.1519	53.3326	11.2942	77.0642	ENST00000453370.1	3	+	185796958	185798736	1778	2	ENSG00000234197.1	Antisense	ENSEMBL
p23854	1.54717e-05	0.214105	0.995156	408.767	555.333	763.143	2.10789	589.911	1126.86	TCONS_00013598	7	+	130600708	130606911	6203	2	XLOC_006252	Intergenic	HumanLincRNACatalog
p1649	7.38256e-09	4.04851e-05	0.995277	98.4916	139.258	68.1903	151.216	37.7024	115.577	ENST00000421256.1	10	-	81390510	81391942	1432	2	ENSG00000226676.1	Intergenic	ENSEMBL
p9059	1.47478e-07	6.33653e-08	0.995285	75.979	34.979	70.4794	58.0103	62.6633	59.9084	ENST00000421563.1	2	-	23598099	23604170	6071	4	ENSG00000235497.1	Intergenic	ENSEMBL
p12009	9.49853e-12	0.000195641	0.995326	2913	2241.49	4891.88	678.218	3852.11	5469.1	ENST00000467198.1	3	+	147657790	147660801	3011	2	ENSG00000239922.1	Intergenic	ENSEMBL
p25743	1.0037e-10	3.73127e-07	0.995616	706.42	638.825	310.661	619.624	655.258	373.764	uc001iqe.3	10	+	18967048	18970568	3520	1	AK022915	Divergent	UCSC
p21420	5.32094e-10	7.12607e-08	0.996062	310.185	487.232	221.75	307.328	261.666	446.161	TCONS_00028384	20	-	37062992	37063976	984	2	XLOC_013739	Intergenic	HumanLincRNACatalog
p14145	3.73649e-05	0.0309857	0.996248	5041.42	2157.09	4761.12	3692.18	1040.89	7181.69	ENST00000602861.1	6	-	30260110	30264014	3904	2	ENSG00000231074.3	Intergenic	ENSEMBL
p19085	2.10412e-06	6.88204e-10	0.996611	58.9167	62.2444	39.5191	71.8192	35.9905	52.3259	TCONS_00022073	13	-	85456664	85458427	1763	2	XLOC_010676	Intergenic	HumanLincRNACatalog
p22444	9.05648e-08	8.95093e-08	0.996764	1102.23	525.682	389.301	149.849	41.9125	1818.92	TCONS_00007979	4	+	10069733	10073254	3521	2	XLOC_003449	Intergenic	HumanLincRNACatalog
p6646	0.00038538	0.000256646	0.997009	96.8157	24.4204	192.775	184.88	44.4337	83.7576	ENST00000416958.1	17	-	4400688	4402969	2281	2	ENSG00000229782.1	Antisense	ENSEMBL
p23663	0.00289696	1.30064e-06	0.997016	197.929	236.637	228.45	187.212	240.581	233.245	TCONS_00013823	7	-	62441008	62453054	12046	2	XLOC_006462	Intergenic	HumanLincRNACatalog
p2930	0.326793	0.19694	0.997487	93.0401	181.024	132.899	183.832	161.74	60.3683	ENST00000527804.1	11	+	103816275	103817274	999	2	ENSG00000255548.1	Intronic	ENSEMBL
p17207	0.000287856	0.00034419	0.997515	124.083	59.4451	184.399	111.674	14.0192	241.318	ENST00000444482.1	X	+	73168807	73169393	586	2	ENSG00000228906.1	Intergenic	ENSEMBL
p5786	9.74611e-11	1.93647e-09	0.997636	1134.7	958.763	1117.71	148.015	1063.61	1991.96	ENST00000565879.1	16	-	597184	603847	6663	2	ENSG00000261691.1	Antisense	ENSEMBL
p8896	7.85126e-13	0.9776	0.998366	2587.36	3651.12	3284.71	1799.42	2699.84	5008.36	ENST00000592090.1	2	-	305624	306491	867	2	ENSG00000235779.2	Intergenic	ENSEMBL
p7197	0.0689175	4.28597e-05	0.998882	1386.22	1074.62	783.721	856.205	748.629	1636.1	ENST00000581718.1	17	+	16342350	16373685	31335	4	ENSG00000175061.11	Antisense	ENSEMBL
p24554	0.0217612	0.0127233	0.999052	83.5601	71.4336	3.6466	24.8693	42.3164	91.3041	TCONS_00016167	9	+	130919331	130921865	2534	2	XLOC_007577	Divergent	HumanLincRNACatalog
p5410	0.000186722	7.91024e-11	0.999257	117.65	191.446	48.6201	94.883	130.015	132.552	ENST00000560839.1	15	+	20978412	20980200	1788	2	ENSG00000259443.1	Intergenic	ENSEMBL
p18863	0.000642655	0.119167	0.999464	101.354	42.3513	124.774	135.078	57.4342	75.8225	TCONS_00020459	12	+	67788394	67815084	26690	2	XLOC_009790	Intergenic	HumanLincRNACatalog
p33718	2.46123e-07	0.102617	0.999519	1210.42	1351.58	547.619	369.928	797.152	1941.05	NR_015343.2	7	+	5111690	5112854	1164	3	LOC389458	Antisense	RefSeq
p19980	3.33389e-11	2.92062e-06	0.999673	642.726	461.976	755.888	133.435	533.883	1192.66	TCONS_00024308	16	+	432113	434542	2429	2	XLOC_011618	Divergent	HumanLincRNACatalog
p4392	0.0231017	1.00409e-11	0.999755	2577.45	3141.43	202.135	861.629	2638.57	2419.36	ENST00000555045.1	14	-	24408821	24423375	14554	3	ENSG00000215256.3	Antisense	ENSEMBL
p10	9.62215e-11	2.16368e-16	1	4.39025	4.39025	4.39025	4.39025	4.39025	4.39025	ENST00000440196.2	1	-	529832	530597	765	2	ENSG00000239664.2	Intergenic	ENSEMBL
p1007	0.924543	7.61231e-08	1	4.39025	4.39025	4.39025	4.39025	4.39025	4.39025	ENST00000450461.1	1	+	71514537	71532867	18330	2	ENSG00000235079.1	Antisense	ENSEMBL
p1015	0.00335042	2.40154e-09	1	4.39025	4.39025	4.39025	4.39025	4.39025	4.39025	ENST00000600103.1	1	+	71667770	71873362	205592	8	ENSG00000229956.4	Antisense	ENSEMBL
p1018	9.14039e-08	4.13002e-18	1	4.39025	4.39025	4.39025	4.39025	4.39025	4.39025	ENST00000587306.1	1	+	71873315	71934193	60878	3	ENSG00000229956.4	Intronic	ENSEMBL
p102	0.000860073	0.503148	1	4.39025	4.39025	4.39025	4.39025	4.39025	4.39025	ENST00000451424.1	1	-	20969149	20978686	9537	3	ENSG00000117242.7	Antisense	ENSEMBL
p1022	0.00522554	1.42639e-18	1	4.39025	4.39025	4.39025	4.39025	4.39025	4.39025	ENST00000591654.1	1	+	71929091	71955586	26495	6	ENSG00000229956.4	Intronic	ENSEMBL
p1039	0.000184352	2.28871e-15	1	4.39025	4.39025	4.39025	4.39025	4.39025	4.39025	ENST00000436742.1	1	+	78695282	78759574	64292	6	ENSG00000237413.1	Intergenic	ENSEMBL
p1041	0.321696	1.06979e-09	1	4.39025	4.39025	4.39025	4.39025	4.39025	4.39025	ENST00000418041.1	1	+	81001439	81112473	111034	3	ENSG00000234184.1	Intergenic	ENSEMBL
p1044	0.0221151	2.35464e-05	1	4.39025	4.39025	4.39025	4.39025	4.39025	4.39025	ENST00000439024.1	1	+	81970783	81971981	1198	2	ENSG00000227960.1	Intergenic	ENSEMBL
p1052	5.47163e-06	8.96978e-19	1	4.39025	4.39025	4.39025	4.39025	4.39025	4.39025	ENST00000587165.1	1	+	87597737	87627820	30083	3	ENSG00000267272.1	Intergenic	ENSEMBL
p1054	9.42481e-06	0.00273881	1	4.39025	4.39025	4.39025	4.39025	4.39025	4.39025	ENST00000429074.1	1	+	90095283	90141945	46662	4	ENSG00000230735.1	Antisense	ENSEMBL
p1056	2.96479e-09	1.26215e-09	1	4.39025	4.39025	4.39025	4.39025	4.39025	4.39025	ENST00000425185.1	1	+	91317315	91319843	2528	2	ENSG00000225446.1	Intergenic	ENSEMBL
p1057	0.00281132	1.41306e-08	1	4.39025	4.39025	4.39025	4.39025	4.39025	4.39025	ENST00000564442.1	1	+	92864530	92867613	3083	1	ENSG00000261311.1	Intergenic	ENSEMBL
p1060	3.25236e-07	8.19723e-11	1	4.39025	4.39025	4.39025	4.39025	4.39025	4.39025	ENST00000417401.1	1	+	94057806	94071130	13324	3	ENSG00000224093.1	Antisense	ENSEMBL
p1061	1.13388e-11	1.87146e-12	1	4.39025	4.39025	4.39025	4.39025	4.39025	4.39025	ENST00000412628.1	1	+	94059941	94066319	6378	2	ENSG00000224093.1	Intronic	ENSEMBL
p1072	1.0472e-10	3.5097e-14	1	4.39025	4.39025	4.39025	4.39025	4.39025	4.39025	ENST00000422980.1	1	+	97561478	97788511	227033	5	ENSG00000232878.1	Antisense	ENSEMBL
p1073	3.60141e-07	5.9864e-10	1	4.39025	4.39025	4.39025	4.39025	4.39025	4.39025	ENST00000431362.1	1	+	98262476	98263424	948	2	ENSG00000235777.1	Intronic	ENSEMBL
p1078	1.25379e-08	4.29291e-17	1	4.39025	4.39025	4.39025	4.39025	4.39025	4.39025	ENST00000414686.1	1	+	101461028	101461816	788	2	ENSG00000235795.1	Intronic	ENSEMBL
p1079	0.000164894	0.324396	1	4.39025	4.39025	4.39025	4.39025	4.39025	4.39025	ENST00000453011.1	1	+	101491433	101546118	54685	5	ENSG00000233184.1	Divergent	ENSEMBL
p108	5.58147e-08	3.74987e-05	1	4.39025	4.39025	4.39025	4.39025	4.39025	4.39025	ENST00000427796.1	1	-	24086871	24104777	17906	4	ENSG00000236810.1	Antisense	ENSEMBL
p1082	0.837206	2.0121e-15	1	4.39025	4.39025	4.39025	4.39025	4.39025	4.39025	ENST00000561748.1	1	+	101708713	101709305	592	1	ENSG00000260940.1	Intergenic	ENSEMBL
p1085	7.95667e-06	0.0182316	1	4.39025	4.39025	4.39025	4.39025	4.39025	4.39025	ENST00000444327.1	1	+	101815604	101855859	40255	2	ENSG00000231671.1	Intergenic	ENSEMBL
p1092	2.55742e-11	5.21667e-22	1	4.39025	4.39025	4.39025	4.39025	4.39025	4.39025	ENST00000438318.1	1	+	108507064	108537229	30165	3	ENSG00000230489.1	Antisense	ENSEMBL
p1093	0.206342	5.57238e-07	1	4.39025	4.39025	4.39025	4.39025	4.39025	4.39025	ENST00000564063.1	1	+	108742547	108744113	1566	1	ENSG00000260879.1	Antisense	ENSEMBL
p11	1.84049e-10	2.07576e-05	1	4.39025	4.39025	4.39025	4.39025	4.39025	4.39025	ENST00000357876.5	1	-	529838	532878	3040	2	ENSG00000239664.2	Intergenic	ENSEMBL
p1107	0.0194287	6.90797e-19	1	4.39025	4.39025	4.39025	4.39025	4.39025	4.39025	ENST00000596959.1	1	+	110603483	110603939	456	1	ENSG00000258634.2	Antisense	ENSEMBL
p1111	0.00275224	2.24908e-07	1	4.39025	4.39025	4.39025	4.39025	4.39025	4.39025	ENST00000587691.1	1	+	110950461	110955120	4659	2	ENSG00000224699.3	Antisense	ENSEMBL
p1117	0.00470324	2.39082e-07	1	4.39025	4.39025	4.39025	4.39025	4.39025	4.39025	ENST00000524935.1	1	+	112282474	112289235	6761	2	ENSG00000227811.2	Intronic	ENSEMBL
p1119	1.34069e-08	3.49476e-15	1	4.39025	4.39025	4.39025	4.39025	4.39025	4.39025	ENST00000508462.1	1	+	112999439	113006078	6639	2	ENSG00000248201.1	Antisense	ENSEMBL
p112	1.45548e-05	0.00498082	1	4.39025	4.39025	4.39025	4.39025	4.39025	4.39025	ENST00000577528.1	1	-	24865291	24882515	17224	3	ENSG00000264443.1	Divergent	ENSEMBL
p1123	1.80055e-13	6.70334e-14	1	4.39025	4.39025	4.39025	4.39025	4.39025	4.39025	ENST00000428411.1	1	+	113499082	113511609	12527	3	ENSG00000226419.1	Divergent	ENSEMBL
p1125	0.000214361	0.612223	1	4.39025	4.39025	4.39025	4.39025	4.39025	4.39025	ENST00000429398.1	1	+	114355000	114366118	11118	4	ENSG00000231128.1	Antisense	ENSEMBL
p1128	0.0936546	0.00186881	1	4.39025	4.39025	4.39025	4.39025	4.39025	4.39025	ENST00000419536.1	1	+	114399256	114443859	44603	5	ENSG00000226167.1	Antisense	ENSEMBL
p1129	3.19527e-08	4.9408e-07	1	4.39025	4.39025	4.39025	4.39025	4.39025	4.39025	ENST00000448680.1	1	+	115642292	115645279	2987	2	ENSG00000233730.1	Intergenic	ENSEMBL
p1137	1.98791e-10	0.026389	1	4.39025	4.39025	4.39025	4.39025	4.39025	4.39025	ENST00000445565.1	1	+	119689031	119689656	625	2	ENSG00000231365.1	Intergenic	ENSEMBL
p1141	0.212588	0.00500145	1	4.39025	4.39025	4.39025	4.39025	4.39025	4.39025	ENST00000457996.1	1	+	120925633	120933000	7367	2	ENSG00000233029.3	Antisense	ENSEMBL
p1150	0.00124208	0.00463761	1	4.39025	4.39025	4.39025	4.39025	4.39025	4.39025	ENST00000447407.1	1	+	143119060	143231756	112696	4	ENSG00000230850.2	Intergenic	ENSEMBL
p1165	0.427505	4.28974e-09	1	4.39025	4.39025	4.39025	4.39025	4.39025	4.39025	ENST00000457439.1	1	+	143687151	143713485	26334	4	ENSG00000231734.3	Intergenic	ENSEMBL
p1166	0.00822681	6.59099e-09	1	4.39025	4.39025	4.39025	4.39025	4.39025	4.39025	ENST00000426533.1	1	+	143687157	143712593	25436	7	ENSG00000231734.3	Intergenic	ENSEMBL
p1168	9.62473e-11	2.63545e-17	1	4.39025	4.39025	4.39025	4.39025	4.39025	4.39025	ENST00000532137.1	1	+	144858173	144865800	7627	3	ENSG00000255148.1	Intronic	ENSEMBL
p1172	3.07436e-07	2.53586e-12	1	4.39025	4.39025	4.39025	4.39025	4.39025	4.39025	ENST00000415065.1	1	+	145541592	145542229	637	2	ENSG00000244619.1	Intronic	ENSEMBL
p1175	1.13589e-05	2.70009e-05	1	4.39025	4.39025	4.39025	4.39025	4.39025	4.39025	ENST00000431525.1	1	+	147169913	147171461	1548	2	ENSG00000227139.1	Intergenic	ENSEMBL
p1176	1.53547e-06	1.56947e-15	1	4.39025	4.39025	4.39025	4.39025	4.39025	4.39025	ENST00000428911.1	1	+	147229425	147230517	1092	2	ENSG00000234482.1	Antisense	ENSEMBL
p119	4.72629e-14	2.87004e-17	1	4.39025	4.39025	4.39025	4.39025	4.39025	4.39025	ENST00000448923.1	1	-	26496982	26498312	1330	3	ENSG00000236782.1	Antisense	ENSEMBL
p1191	0.409142	0.00544737	1	4.39025	4.39025	4.39025	4.39025	4.39025	4.39025	ENST00000443018.1	1	+	149230715	149232554	1839	2	ENSG00000232721.1	Intergenic	ENSEMBL
p1204	0.0165614	4.30911e-09	1	4.39025	4.39025	4.39025	4.39025	4.39025	4.39025	ENST00000434112.1	1	+	151512991	151534331	21340	2	ENSG00000232536.1	Intronic	ENSEMBL
p1207	1.00662e-10	1.21675e-06	1	4.39025	4.39025	4.39025	4.39025	4.39025	4.39025	ENST00000601684.1	1	+	151728016	151732387	4371	2	ENSG00000269621.1	Antisense	ENSEMBL
p1213	6.45725e-11	0.403826	1	4.39025	4.39025	4.39025	4.39025	4.39025	4.39025	ENST00000420707.1	1	+	152161826	152313586	151760	9	ENSG00000237975.2	Antisense	ENSEMBL
p1218	0.000118338	5.77859e-08	1	4.39025	4.39025	4.39025	4.39025	4.39025	4.39025	ENST00000444515.1	1	+	152627952	152629280	1328	3	ENSG00000176075.6	Intergenic	ENSEMBL
p122	0.00346718	0.00284362	1	4.39025	4.39025	4.39025	4.39025	4.39025	4.39025	ENST00000425205.1	1	-	27555596	27560843	5247	3	ENSG00000224311.1	Divergent	ENSEMBL
p1221	2.33535e-07	0.172912	1	4.39025	4.39025	4.39025	4.39025	4.39025	4.39025	ENST00000413826.1	1	+	153653276	153654268	992	2	ENSG00000244484.1	Antisense	ENSEMBL
p1235	0.000237183	0.000575191	1	4.39025	4.39025	4.39025	4.39025	4.39025	4.39025	ENST00000453692.1	1	+	157661551	157666249	4698	2	ENSG00000227217.1	Antisense	ENSEMBL
p1247	0.000327345	1.82918e-17	1	4.39025	4.39025	4.39025	4.39025	4.39025	4.39025	ENST00000437833.1	1	+	161337811	161341754	3943	2	ENSG00000235477.1	Divergent	ENSEMBL
p126	0.567024	0.0100602	1	4.39025	4.39025	4.39025	4.39025	4.39025	4.39025	ENST00000474814.1	1	-	28905050	28908383	3333	3	ENSG00000197989.8	Antisense	ENSEMBL
p127	0.327783	1.99743e-07	1	4.39025	4.39025	4.39025	4.39025	4.39025	4.39025	ENST00000464115.1	1	-	28906846	28908365	1519	3	ENSG00000197989.8	Intergenic	ENSEMBL
p1274	1.07728e-07	2.84868e-09	1	4.39025	4.39025	4.39025	4.39025	4.39025	4.39025	ENST00000414890.1	1	+	174866094	174867133	1039	2	ENSG00000223525.1	Intronic	ENSEMBL
p1277	0.328974	1.17924e-12	1	4.39025	4.39025	4.39025	4.39025	4.39025	4.39025	ENST00000426030.2	1	+	175986412	175987896	1484	2	ENSG00000228686.2	Intronic	ENSEMBL
p1278	4.68578e-08	2.78028e-12	1	4.39025	4.39025	4.39025	4.39025	4.39025	4.39025	ENST00000456125.1	1	+	176176783	176198466	21683	3	ENSG00000236021.1	Divergent	ENSEMBL
p1279	0.0109181	3.28898e-14	1	4.39025	4.39025	4.39025	4.39025	4.39025	4.39025	ENST00000454327.1	1	+	176477903	176478979	1076	2	ENSG00000230220.1	Intronic	ENSEMBL
p128	2.45084e-09	2.57467e-05	1	4.39025	4.39025	4.39025	4.39025	4.39025	4.39025	ENST00000461832.1	1	-	28906870	28908369	1499	3	ENSG00000197989.8	Intergenic	ENSEMBL
p129	4.81922e-06	3.18709e-08	1	4.39025	4.39025	4.39025	4.39025	4.39025	4.39025	ENST00000418471.1	1	-	29196994	29203848	6854	3	ENSG00000233427.1	Intergenic	ENSEMBL
p1332	3.31317e-12	1.48258e-05	1	4.39025	4.39025	4.39025	4.39025	4.39025	4.39025	ENST00000414927.1	1	+	201862969	201869106	6137	3	ENSG00000223774.1	Antisense	ENSEMBL
p1337	1.00755e-10	2.06422e-07	1	4.39025	4.39025	4.39025	4.39025	4.39025	4.39025	ENST00000553157.1	1	+	202780081	202781284	1203	2	ENSG00000228288.2	Intergenic	ENSEMBL
p1339	9.62769e-11	0.0501888	1	4.39025	4.39025	4.39025	4.39025	4.39025	4.39025	ENST00000433008.1	1	+	203256897	203257662	765	3	ENSG00000231507.1	Intergenic	ENSEMBL
p1345	1.64846e-08	6.98367e-15	1	4.39025	4.39025	4.39025	4.39025	4.39025	4.39025	ENST00000444037.1	1	+	204595902	204598840	2938	2	ENSG00000240219.1	Intronic	ENSEMBL
p1351	2.31046e-06	1.24435e-05	1	4.39025	4.39025	4.39025	4.39025	4.39025	4.39025	ENST00000562504.1	1	+	206677280	206677789	509	1	ENSG00000261000.1	Intergenic	ENSEMBL
p1362	9.84021e-11	1.91581e-20	1	4.39025	4.39025	4.39025	4.39025	4.39025	4.39025	ENST00000534914.1	1	+	211556144	211570206	14062	5	ENSG00000153363.8	Intergenic	ENSEMBL
p1378	3.12166e-08	0.250915	1	4.39025	4.39025	4.39025	4.39025	4.39025	4.39025	ENST00000447949.1	1	+	212530759	212531695	936	2	ENSG00000229832.1	Intronic	ENSEMBL
p138	5.01782e-10	2.4483e-12	1	4.39025	4.39025	4.39025	4.39025	4.39025	4.39025	ENST00000453837.1	1	-	32307619	32321169	13550	2	ENSG00000203620.2	Intergenic	ENSEMBL
p1381	0.598563	0.0239862	1	4.39025	4.39025	4.39025	4.39025	4.39025	4.39025	ENST00000417161.1	1	+	213665643	213719790	54147	2	ENSG00000225233.1	Intergenic	ENSEMBL
p1396	0.000387423	4.02601e-12	1	4.39025	4.39025	4.39025	4.39025	4.39025	4.39025	ENST00000441160.1	1	+	222139751	222158306	18555	3	ENSG00000228437.1	Intergenic	ENSEMBL
p1399	0.00321731	0.139051	1	4.39025	4.39025	4.39025	4.39025	4.39025	4.39025	ENST00000413074.1	1	+	222763303	222766374	3071	2	ENSG00000225265.1	Divergent	ENSEMBL
p1401	0.397042	0.614668	1	4.39025	4.39025	4.39025	4.39025	4.39025	4.39025	ENST00000457955.1	1	+	222988388	223010571	22183	5	ENSG00000228106.1	Antisense	ENSEMBL
p1402	0.528475	1.65811e-06	1	4.39025	4.39025	4.39025	4.39025	4.39025	4.39025	ENST00000444858.1	1	+	222988392	223010726	22334	4	ENSG00000228106.1	Antisense	ENSEMBL
p1403	0.465981	0.078021	1	4.39025	4.39025	4.39025	4.39025	4.39025	4.39025	ENST00000435378.1	1	+	222988401	223010724	22323	5	ENSG00000228106.1	Antisense	ENSEMBL
p1407	1.01978e-10	5.64167e-05	1	4.39025	4.39025	4.39025	4.39025	4.39025	4.39025	ENST00000446145.1	1	+	223354485	223361496	7011	3	ENSG00000226601.1	Intergenic	ENSEMBL
p1409	9.6227e-11	1.02452e-06	1	4.39025	4.39025	4.39025	4.39025	4.39025	4.39025	ENST00000420350.1	1	+	224407314	224415745	8431	3	ENSG00000237101.1	Antisense	ENSEMBL
p141	1.40004e-06	0.607234	1	4.39025	4.39025	4.39025	4.39025	4.39025	4.39025	ENST00000373604.4	1	-	32670369	32671786	1417	2	ENSG00000224066.1	Antisense	ENSEMBL
p1414	4.92813e-06	0.00656853	1	4.39025	4.39025	4.39025	4.39025	4.39025	4.39025	ENST00000453525.1	1	+	226856597	226864046	7449	2	ENSG00000228548.1	Intronic	ENSEMBL
p1417	1.01389e-10	0.541784	1	4.39025	4.39025	4.39025	4.39025	4.39025	4.39025	ENST00000445817.1	1	+	227581291	227618736	37445	4	ENSG00000234277.2	Intergenic	ENSEMBL
p1432	9.63953e-11	7.27187e-07	1	4.39025	4.39025	4.39025	4.39025	4.39025	4.39025	ENST00000436039.1	1	+	234742753	234745229	2476	2	ENSG00000228830.1	Antisense	ENSEMBL
p1447	1.89166e-07	0.96117	1	4.39025	4.39025	4.39025	4.39025	4.39025	4.39025	ENST00000413994.1	1	+	241587697	241596792	9095	2	ENSG00000225554.1	Intergenic	ENSEMBL
p145	0.450069	2.87051e-14	1	4.39025	4.39025	4.39025	4.39025	4.39025	4.39025	ENST00000542839.1	1	-	35227026	35253698	26672	2	ENSG00000255811.1	Antisense	ENSEMBL
p1460	0.00024411	1.63137e-16	1	4.39025	4.39025	4.39025	4.39025	4.39025	4.39025	ENST00000582218.1	1	+	247803350	247827145	23795	2	ENSG00000235749.2	Intergenic	ENSEMBL
p15	9.62669e-11	2.03375e-07	1	4.39025	4.39025	4.39025	4.39025	4.39025	4.39025	ENST00000448605.2	1	-	639064	741274	102210	3	ENSG00000230021.2	Intergenic	ENSEMBL
p150	0.00177405	0.0324416	1	4.39025	4.39025	4.39025	4.39025	4.39025	4.39025	ENST00000444348.1	1	-	36035415	36043330	7915	3	ENSG00000239636.1	Antisense	ENSEMBL
p152	0.997607	0.291974	1	4.39025	4.39025	4.39025	4.39025	4.39025	4.39025	ENST00000433474.1	1	-	38265391	38266551	1160	2	ENSG00000233728.1	Antisense	ENSEMBL
p154	1.04354e-08	5.61684e-14	1	4.39025	4.39025	4.39025	4.39025	4.39025	4.39025	ENST00000289890.7	1	-	39715509	39723321	7812	3	ENSG00000226438.1	Antisense	ENSEMBL
p158	6.41419e-06	1.11492e-13	1	4.39025	4.39025	4.39025	4.39025	4.39025	4.39025	ENST00000450713.1	1	-	40958828	40974333	15505	2	ENSG00000238287.1	Antisense	ENSEMBL
p161	2.72039e-12	0.00855863	1	4.39025	4.39025	4.39025	4.39025	4.39025	4.39025	ENST00000440100.1	1	-	41134760	41153260	18500	5	ENSG00000237899.1	Intergenic	ENSEMBL
p168	4.26644e-09	3.2066e-07	1	4.39025	4.39025	4.39025	4.39025	4.39025	4.39025	ENST00000396885.2	1	-	43913446	43914315	869	2	ENSG00000229372.1	Antisense	ENSEMBL
p169	3.65735e-09	0.0183405	1	4.39025	4.39025	4.39025	4.39025	4.39025	4.39025	ENST00000434346.1	1	-	44167767	44170140	2373	3	ENSG00000236200.1	Antisense	ENSEMBL
p171	3.27038e-07	0.4973	1	4.39025	4.39025	4.39025	4.39025	4.39025	4.39025	ENST00000418149.1	1	-	44169984	44173001	3017	2	ENSG00000236200.1	Antisense	ENSEMBL
p17335	1.47943e-10	0.0685274	1	4.39025	4.39025	4.39025	4.39025	4.39025	4.39025	TCONS_00001368	1	-	843464	845308	1844	2	XLOC_000669	Intergenic	HumanLincRNACatalog
p17337	0.0287497	1.27475e-14	1	4.39025	4.39025	4.39025	4.39025	4.39025	4.39025	TCONS_00000073	1	-	852952	854817	1865	4	XLOC_000670	Intergenic	HumanLincRNACatalog
p17339	0.0348694	0.128968	1	4.39025	4.39025	4.39025	4.39025	4.39025	4.39025	TCONS_00000455	1	-	2143961	2152175	8214	2	XLOC_000677	Antisense	HumanLincRNACatalog
p17346	9.84548e-11	0.00723729	1	4.39025	4.39025	4.39025	4.39025	4.39025	4.39025	TCONS_00000077	1	-	5621768	5728315	106547	3	XLOC_000688	Intergenic	HumanLincRNACatalog
p17354	1.0024e-10	0.518923	1	4.39025	4.39025	4.39025	4.39025	4.39025	4.39025	TCONS_00000470	1	-	13983805	13987033	3228	2	XLOC_000707	Intergenic	HumanLincRNACatalog
p17358	0.00166361	0.254734	1	4.39025	4.39025	4.39025	4.39025	4.39025	4.39025	TCONS_00001406	1	-	16123396	16126839	3443	2	XLOC_000721	Intergenic	HumanLincRNACatalog
p17360	4.09388e-09	4.07713e-12	1	4.39025	4.39025	4.39025	4.39025	4.39025	4.39025	TCONS_00001409	1	-	18335985	18337010	1025	2	XLOC_000724	Intergenic	HumanLincRNACatalog
p17361	3.43206e-06	2.52784e-16	1	4.39025	4.39025	4.39025	4.39025	4.39025	4.39025	TCONS_00000078	1	-	20687597	20732187	44590	4	XLOC_000730	Intergenic	HumanLincRNACatalog
p17370	2.94643e-08	6.50691e-09	1	4.39025	4.39025	4.39025	4.39025	4.39025	4.39025	TCONS_00000483	1	-	23940282	23945957	5675	2	XLOC_000738	Intergenic	HumanLincRNACatalog
p17373	1.18793e-07	2.22383e-05	1	4.39025	4.39025	4.39025	4.39025	4.39025	4.39025	TCONS_00000490	1	-	25579797	25594376	14579	2	XLOC_000746	Intergenic	HumanLincRNACatalog
p17383	2.35599e-09	2.16616e-08	1	4.39025	4.39025	4.39025	4.39025	4.39025	4.39025	TCONS_00001450	1	-	33603693	33606476	2783	2	XLOC_000780	Intergenic	HumanLincRNACatalog
p17392	1.15482e-05	1.31463e-07	1	4.39025	4.39025	4.39025	4.39025	4.39025	4.39025	TCONS_00001482	1	-	45762365	45771260	8895	2	XLOC_000816	Intergenic	HumanLincRNACatalog
p17393	0.00177325	7.32704e-07	1	4.39025	4.39025	4.39025	4.39025	4.39025	4.39025	TCONS_00000513	1	-	45769862	45771290	1428	2	XLOC_000816	Intergenic	HumanLincRNACatalog
p17397	0.0712405	0.000836219	1	4.39025	4.39025	4.39025	4.39025	4.39025	4.39025	TCONS_00001485	1	-	47873216	47874257	1041	2	XLOC_000822	Intergenic	HumanLincRNACatalog
p17398	2.57586e-07	2.0849e-12	1	4.39025	4.39025	4.39025	4.39025	4.39025	4.39025	TCONS_00001488	1	-	47971931	47973315	1384	2	XLOC_000824	Intergenic	HumanLincRNACatalog
p17402	2.45723e-05	0.0532317	1	4.39025	4.39025	4.39025	4.39025	4.39025	4.39025	TCONS_00001491	1	-	50731520	50745851	14331	2	XLOC_000831	Intergenic	HumanLincRNACatalog
p17403	2.44028e-07	2.22271e-12	1	4.39025	4.39025	4.39025	4.39025	4.39025	4.39025	TCONS_00001492	1	-	50782664	50786783	4119	3	XLOC_000832	Intergenic	HumanLincRNACatalog
p17406	2.55398e-08	3.15522e-05	1	4.39025	4.39025	4.39025	4.39025	4.39025	4.39025	TCONS_00001494	1	-	51442716	51443912	1196	2	XLOC_000833	Intergenic	HumanLincRNACatalog
p17432	0.000476655	9.06788e-16	1	4.39025	4.39025	4.39025	4.39025	4.39025	4.39025	TCONS_00001552	1	-	85063634	85086673	23039	3	XLOC_000895	Intergenic	HumanLincRNACatalog
p17455	0.000826887	3.39278e-12	1	4.39025	4.39025	4.39025	4.39025	4.39025	4.39025	TCONS_00001587	1	-	93792164	93806036	13872	5	XLOC_000918	Intergenic	HumanLincRNACatalog
p17465	0.0209817	3.44264e-06	1	4.39025	4.39025	4.39025	4.39025	4.39025	4.39025	TCONS_00001608	1	-	100728862	100731675	2813	3	XLOC_000939	Divergent	HumanLincRNACatalog
p17468	2.26716e-06	0.00305514	1	4.39025	4.39025	4.39025	4.39025	4.39025	4.39025	TCONS_00001611	1	-	102775824	102830793	54969	2	XLOC_000943	Intergenic	HumanLincRNACatalog
p17486	1.59788e-10	4.0314e-06	1	4.39025	4.39025	4.39025	4.39025	4.39025	4.39025	TCONS_00001648	1	-	120615907	120619716	3809	2	XLOC_000986	Intergenic	HumanLincRNACatalog
p17487	0.00782963	8.11997e-07	1	4.39025	4.39025	4.39025	4.39025	4.39025	4.39025	TCONS_00001662	1	-	146644429	146645134	705	2	XLOC_001002	Divergent	HumanLincRNACatalog
p17495	6.47878e-05	0.962936	1	4.39025	4.39025	4.39025	4.39025	4.39025	4.39025	TCONS_00002485	1	-	154442112	154445591	3479	2	XLOC_001035	Divergent	HumanLincRNACatalog
p175	3.10121e-07	0.0135016	1	4.39025	4.39025	4.39025	4.39025	4.39025	4.39025	ENST00000412378.1	1	-	44410045	44412223	2178	2	ENSG00000237950.1	Divergent	ENSEMBL
p17517	0.0614779	0.00459349	1	4.39025	4.39025	4.39025	4.39025	4.39025	4.39025	TCONS_00001741	1	-	182667343	182667678	335	2	XLOC_001117	Intergenic	HumanLincRNACatalog
p17518	2.68383e-08	1.23128e-07	1	4.39025	4.39025	4.39025	4.39025	4.39025	4.39025	TCONS_00001745	1	-	183118843	183119157	314	2	XLOC_001120	Intergenic	HumanLincRNACatalog
p17535	1.50826e-10	2.11648e-09	1	4.39025	4.39025	4.39025	4.39025	4.39025	4.39025	TCONS_00001775	1	-	203395869	203398365	2496	2	XLOC_001160	Intergenic	HumanLincRNACatalog
p17536	3.41147e-10	1.98652e-08	1	4.39025	4.39025	4.39025	4.39025	4.39025	4.39025	TCONS_00001776	1	-	203507262	203525190	17928	2	XLOC_001162	Intergenic	HumanLincRNACatalog
p17540	4.08974e-06	0.000133913	1	4.39025	4.39025	4.39025	4.39025	4.39025	4.39025	TCONS_00001789	1	-	207574927	207589566	14639	3	XLOC_001178	Intergenic	HumanLincRNACatalog
p17554	1.31041e-07	0.564241	1	4.39025	4.39025	4.39025	4.39025	4.39025	4.39025	TCONS_00002581	1	-	212808799	212811197	2398	2	XLOC_001195	Intergenic	HumanLincRNACatalog
p17557	6.98354e-06	1.98117e-05	1	4.39025	4.39025	4.39025	4.39025	4.39025	4.39025	TCONS_00001814	1	-	213107181	213108781	1600	3	XLOC_001198	Intergenic	HumanLincRNACatalog
p17571	9.62227e-11	0.0177865	1	4.39025	4.39025	4.39025	4.39025	4.39025	4.39025	TCONS_00001840	1	-	224623156	224624723	1567	2	XLOC_001227	Intergenic	HumanLincRNACatalog
p17576	0.0107779	0.714316	1	4.39025	4.39025	4.39025	4.39025	4.39025	4.39025	TCONS_00001854	1	-	229027197	229033564	6367	2	XLOC_001242	Intergenic	HumanLincRNACatalog
p17585	9.66837e-11	1.00419e-10	1	4.39025	4.39025	4.39025	4.39025	4.39025	4.39025	TCONS_00002622	1	-	234852451	234855189	2738	2	XLOC_001264	Intergenic	HumanLincRNACatalog
p17589	0.161703	0.00259361	1	4.39025	4.39025	4.39025	4.39025	4.39025	4.39025	TCONS_00001887	1	-	235108773	235116431	7658	2	XLOC_001266	Intergenic	HumanLincRNACatalog
p17590	0.105611	1.97068e-06	1	4.39025	4.39025	4.39025	4.39025	4.39025	4.39025	TCONS_00001888	1	-	235115912	235116505	593	2	XLOC_001266	Intergenic	HumanLincRNACatalog
p17592	0.0792535	9.84495e-08	1	4.39025	4.39025	4.39025	4.39025	4.39025	4.39025	TCONS_00001895	1	-	242692665	242693831	1166	2	XLOC_001280	Intergenic	HumanLincRNACatalog
p17595	1.37134e-10	1.78052e-05	1	4.39025	4.39025	4.39025	4.39025	4.39025	4.39025	TCONS_00001898	1	-	244210525	244212010	1485	2	XLOC_001286	Divergent	HumanLincRNACatalog
p17596	0.00461787	7.10854e-09	1	4.39025	4.39025	4.39025	4.39025	4.39025	4.39025	TCONS_00001899	1	-	244393072	244401962	8890	2	XLOC_001288	Intergenic	HumanLincRNACatalog
p17599	7.38168e-11	0.000487106	1	4.39025	4.39025	4.39025	4.39025	4.39025	4.39025	TCONS_00000124	1	+	529832	530595	763	2	XLOC_000004	Intergenic	HumanLincRNACatalog
p17602	7.88245e-07	4.89721e-05	1	4.39025	4.39025	4.39025	4.39025	4.39025	4.39025	TCONS_00000779	1	+	756410	758975	2565	2	XLOC_000008	Intergenic	HumanLincRNACatalog
p17605	0.000242724	0.00300002	1	4.39025	4.39025	4.39025	4.39025	4.39025	4.39025	TCONS_00000803	1	+	1533412	1536058	2646	2	XLOC_000019	Antisense	HumanLincRNACatalog
p17607	0.105992	2.29438e-14	1	4.39025	4.39025	4.39025	4.39025	4.39025	4.39025	TCONS_00000137	1	+	1535818	1545864	10046	4	XLOC_000019	Divergent	HumanLincRNACatalog
p17611	1.80047e-06	4.90579e-16	1	4.39025	4.39025	4.39025	4.39025	4.39025	4.39025	TCONS_00001923	1	+	2693738	2695364	1626	2	XLOC_000026	Intronic	HumanLincRNACatalog
p17639	6.23908e-06	4.63587e-09	1	4.39025	4.39025	4.39025	4.39025	4.39025	4.39025	TCONS_00001961	1	+	25367663	25373839	6176	3	XLOC_000099	Intergenic	HumanLincRNACatalog
p17647	0.475494	0.0134853	1	4.39025	4.39025	4.39025	4.39025	4.39025	4.39025	TCONS_00000877	1	+	30184548	30185414	866	2	XLOC_000115	Intergenic	HumanLincRNACatalog
p17660	2.28216e-07	0.000971231	1	4.39025	4.39025	4.39025	4.39025	4.39025	4.39025	TCONS_00001989	1	+	39508263	39509883	1620	2	XLOC_000152	Intergenic	HumanLincRNACatalog
p17666	1.56607e-05	0.362789	1	4.39025	4.39025	4.39025	4.39025	4.39025	4.39025	TCONS_00002017	1	+	45672403	45683543	11140	2	XLOC_000167	Divergent	HumanLincRNACatalog
p17670	0.0218184	2.477e-06	1	4.39025	4.39025	4.39025	4.39025	4.39025	4.39025	TCONS_00000930	1	+	47645093	47645573	480	2	XLOC_000175	Intergenic	HumanLincRNACatalog
p17680	0.00278357	9.52731e-06	1	4.39025	4.39025	4.39025	4.39025	4.39025	4.39025	TCONS_00002032	1	+	53905447	53905770	323	2	XLOC_000198	Intergenic	HumanLincRNACatalog
p17683	5.2966e-10	4.09786e-10	1	4.39025	4.39025	4.39025	4.39025	4.39025	4.39025	TCONS_00000949	1	+	55461469	55462838	1369	2	XLOC_000205	Intergenic	HumanLincRNACatalog
p17707	0.000208554	9.13356e-09	1	4.39025	4.39025	4.39025	4.39025	4.39025	4.39025	TCONS_00000984	1	+	73315919	73320112	4193	2	XLOC_000255	Intergenic	HumanLincRNACatalog
p17713	9.99705e-11	0.0116737	1	4.39025	4.39025	4.39025	4.39025	4.39025	4.39025	TCONS_00002073	1	+	78689325	78717247	27922	3	XLOC_000264	Intergenic	HumanLincRNACatalog
p17733	1.69272e-09	7.56902e-06	1	4.39025	4.39025	4.39025	4.39025	4.39025	4.39025	TCONS_00001024	1	+	90251626	90253148	1522	2	XLOC_000291	Intergenic	HumanLincRNACatalog
p17763	6.21957e-06	0.0102626	1	4.39025	4.39025	4.39025	4.39025	4.39025	4.39025	TCONS_00001086	1	+	106993297	106995113	1816	3	XLOC_000329	Intergenic	HumanLincRNACatalog
p17768	3.00177e-07	2.06252e-06	1	4.39025	4.39025	4.39025	4.39025	4.39025	4.39025	TCONS_00000272	1	+	110825155	110825722	567	2	XLOC_000341	Intergenic	HumanLincRNACatalog
p17782	0.903653	0.00400961	1	4.39025	4.39025	4.39025	4.39025	4.39025	4.39025	TCONS_00001136	1	+	142618921	142625251	6330	3	XLOC_000377	Intergenic	HumanLincRNACatalog
p17788	1.1702e-07	8.31543e-11	1	4.39025	4.39025	4.39025	4.39025	4.39025	4.39025	TCONS_00001141	1	+	148556479	148558168	1689	2	XLOC_000390	Divergent	HumanLincRNACatalog
p17790	1.72547e-05	0.0520264	1	4.39025	4.39025	4.39025	4.39025	4.39025	4.39025	TCONS_00000305	1	+	149591178	149592306	1128	2	XLOC_000397	Intergenic	HumanLincRNACatalog
p17793	0.00887656	2.40224e-08	1	4.39025	4.39025	4.39025	4.39025	4.39025	4.39025	TCONS_00002162	1	+	150505132	150509639	4507	2	XLOC_000403	Intergenic	HumanLincRNACatalog
p178	0.000312744	0.414902	1	4.39025	4.39025	4.39025	4.39025	4.39025	4.39025	ENST00000428791.1	1	-	45224795	45241482	16687	3	ENSG00000225721.1	Antisense	ENSEMBL
p17806	1.36517e-07	0.0893333	1	4.39025	4.39025	4.39025	4.39025	4.39025	4.39025	TCONS_00001208	1	+	178621016	178631642	10626	2	XLOC_000474	Intergenic	HumanLincRNACatalog
p17810	6.52219e-06	7.18003e-06	1	4.39025	4.39025	4.39025	4.39025	4.39025	4.39025	TCONS_00001212	1	+	180864245	180869874	5629	2	XLOC_000478	Intergenic	HumanLincRNACatalog
p17811	0.024953	1.89292e-13	1	4.39025	4.39025	4.39025	4.39025	4.39025	4.39025	TCONS_00001215	1	+	181904061	181906113	2052	2	XLOC_000482	Intergenic	HumanLincRNACatalog
p17813	0.000670845	5.27598e-08	1	4.39025	4.39025	4.39025	4.39025	4.39025	4.39025	TCONS_00001218	1	+	184090199	184091540	1341	2	XLOC_000490	Intergenic	HumanLincRNACatalog
p17817	7.82653e-12	0.0119585	1	4.39025	4.39025	4.39025	4.39025	4.39025	4.39025	TCONS_00002202	1	+	185532299	185590112	57813	2	XLOC_000495	Intergenic	HumanLincRNACatalog
p17824	1.35463e-06	9.48222e-08	1	4.39025	4.39025	4.39025	4.39025	4.39025	4.39025	TCONS_00001233	1	+	200380828	200384659	3831	2	XLOC_000515	Intergenic	HumanLincRNACatalog
p17832	0.0471068	0.00265075	1	4.39025	4.39025	4.39025	4.39025	4.39025	4.39025	TCONS_00001253	1	+	207589902	207597521	7619	2	XLOC_000541	Intergenic	HumanLincRNACatalog
p17848	0.000154576	0.194364	1	4.39025	4.39025	4.39025	4.39025	4.39025	4.39025	TCONS_00001278	1	+	219391857	219467786	75929	2	XLOC_000566	Intergenic	HumanLincRNACatalog
p17862	8.84154e-07	7.64192e-07	1	4.39025	4.39025	4.39025	4.39025	4.39025	4.39025	TCONS_00001323	1	+	230450245	230451789	1544	2	XLOC_000605	Intergenic	HumanLincRNACatalog
p17869	0.354443	1.68115e-09	1	4.39025	4.39025	4.39025	4.39025	4.39025	4.39025	TCONS_00002259	1	+	232979122	233001203	22081	3	XLOC_000618	Intergenic	HumanLincRNACatalog
p17870	2.73501e-06	0.0320901	1	4.39025	4.39025	4.39025	4.39025	4.39025	4.39025	TCONS_00001329	1	+	232979122	233033391	54269	4	XLOC_000618	Intergenic	HumanLincRNACatalog
p17877	0.000632203	9.70098e-14	1	4.39025	4.39025	4.39025	4.39025	4.39025	4.39025	TCONS_00001340	1	+	238588740	238608261	19521	2	XLOC_000635	Intergenic	HumanLincRNACatalog
p17885	6.81372e-06	1.27094e-05	1	4.39025	4.39025	4.39025	4.39025	4.39025	4.39025	TCONS_00001355	1	+	246952826	246955790	2964	3	XLOC_000643	Intergenic	HumanLincRNACatalog
p17889	4.71933e-09	1.33147e-05	1	4.39025	4.39025	4.39025	4.39025	4.39025	4.39025	TCONS_00001362	1	+	247549930	247556961	7031	2	XLOC_000647	Intergenic	HumanLincRNACatalog
p181	9.70799e-09	4.00244e-05	1	4.39025	4.39025	4.39025	4.39025	4.39025	4.39025	ENST00000416581.1	1	-	46912344	46915376	3032	3	ENSG00000224863.1	Intergenic	ENSEMBL
p195	0.0401761	0.000286731	1	4.39025	4.39025	4.39025	4.39025	4.39025	4.39025	ENST00000449958.1	1	-	53832339	53833917	1578	2	ENSG00000230138.1	Intergenic	ENSEMBL
p199	1.1975e-06	0.00509266	1	4.39025	4.39025	4.39025	4.39025	4.39025	4.39025	ENST00000458389.1	1	-	55314137	55316072	1935	2	ENSG00000244324.1	Antisense	ENSEMBL
p204	5.33225e-10	1.94548e-05	1	4.39025	4.39025	4.39025	4.39025	4.39025	4.39025	ENST00000424592.1	1	-	59304119	59316926	12807	3	ENSG00000231740.1	Intergenic	ENSEMBL
p206	0.761535	5.28166e-05	1	4.39025	4.39025	4.39025	4.39025	4.39025	4.39025	ENST00000427292.1	1	-	59361516	59362375	859	2	ENSG00000232453.1	Intergenic	ENSEMBL
p213	5.08094e-08	0.0581432	1	4.39025	4.39025	4.39025	4.39025	4.39025	4.39025	ENST00000587839.1	1	-	59598378	59612499	14121	2	ENSG00000224609.2	Intergenic	ENSEMBL
p214	0.00087455	1.90521e-17	1	4.39025	4.39025	4.39025	4.39025	4.39025	4.39025	ENST00000443012.1	1	-	60220418	60254854	34436	2	ENSG00000226883.1	Antisense	ENSEMBL
p24747	0.0141612	5.87326e-08	1	4.39025	4.39025	4.39025	4.39025	4.39025	4.39025	NR_037844.1	1	-	2487207	2488450	1243	2	LOC100133445	Antisense	RefSeq
p24754	2.69537e-08	7.58358e-07	1	4.39025	4.39025	4.39025	4.39025	4.39025	4.39025	XR_158754.1	1	-	23610848	23612375	1527	2	LOC100996511	Intergenic	RefSeq
p24760	4.95156e-05	0.0921527	1	4.39025	4.39025	4.39025	4.39025	4.39025	4.39025	XR_110480.2	1	-	100730236	100731701	1465	3	LOC100506007	Divergent	RefSeq
p24765	0.290401	7.95447e-06	1	4.39025	4.39025	4.39025	4.39025	4.39025	4.39025	NR_003005.1	1	-	155895748	155895877	129	1	SCARNA4	Intronic	RefSeq
p24766	1.27719e-07	0.102639	1	4.39025	4.39025	4.39025	4.39025	4.39025	4.39025	NR_028105.1	1	-	160209011	160232318	23307	4	DCAF8	Antisense	RefSeq
p24771	0.0230729	7.28011e-08	1	4.39025	4.39025	4.39025	4.39025	4.39025	4.39025	XR_108307.2	1	-	172362877	172384514	21637	3	LOC100505991	Antisense	RefSeq
p24773	1.5262e-07	0.00231111	1	4.39025	4.39025	4.39025	4.39025	4.39025	4.39025	NR_002998.1	1	-	175937532	175937676	144	1	SCARNA3	Intronic	RefSeq
p24782	2.98632e-09	0.195824	1	4.39025	4.39025	4.39025	4.39025	4.39025	4.39025	NR_038845.1	1	-	219254314	219347130	92816	5	LOC643723	Divergent	RefSeq
p24789	0.0279597	7.04833e-05	1	4.39025	4.39025	4.39025	4.39025	4.39025	4.39025	NR_047526.1	1	+	762970	778984	16014	3	LOC643837	Intergenic	RefSeq
p24790	1.65451e-05	6.19443e-10	1	4.39025	4.39025	4.39025	4.39025	4.39025	4.39025	NR_040065.1	1	+	4000671	4012643	11972	3	LOC728716	Intergenic	RefSeq
p24792	9.71483e-11	0.000231736	1	4.39025	4.39025	4.39025	4.39025	4.39025	4.39025	XR_108366.1	1	+	17520820	17521393	573	1	LOC400743	Intergenic	RefSeq
p24794	0.00794954	0.0269954	1	4.39025	4.39025	4.39025	4.39025	4.39025	4.39025	NR_023918.1	1	+	22351706	22357716	6010	2	LINC00339	Intergenic	RefSeq
p24796	0.189577	0.0016509	1	4.39025	4.39025	4.39025	4.39025	4.39025	4.39025	NR_024270.1	1	+	45769581	45771291	1710	1	LOC400752	Intergenic	RefSeq
p24800	9.0448e-09	1.17504e-07	1	4.39025	4.39025	4.39025	4.39025	4.39025	4.39025	XR_110482.1	1	+	101491433	101546991	55558	5	LOC100506051	Divergent	RefSeq
p24809	0.551008	7.52104e-14	1	4.39025	4.39025	4.39025	4.39025	4.39025	4.39025	NR_024237.1	1	+	151810944	151816641	5697	4	LOC100132111	Antisense	RefSeq
p24810	0.0657853	3.77853e-16	1	4.39025	4.39025	4.39025	4.39025	4.39025	4.39025	XR_108362.1	1	+	157995344	158001611	6267	2	KIRREL-IT1	Intronic	RefSeq
p24813	1.83793e-10	0.00337879	1	4.39025	4.39025	4.39025	4.39025	4.39025	4.39025	XR_158745.1	1	+	168217905	168222263	4358	2	LOC100996595	Intergenic	RefSeq
p24816	6.08497e-06	6.64142e-05	1	4.39025	4.39025	4.39025	4.39025	4.39025	4.39025	XR_108328.3	1	+	201963424	201964692	1268	2	LOC100506636	Intronic	RefSeq
p251	3.54231e-07	0.491744	1	4.39025	4.39025	4.39025	4.39025	4.39025	4.39025	ENST00000597757.1	1	-	78347043	78353374	6331	2	ENSG00000235927.2	Divergent	ENSEMBL
p25636	1.97848e-08	3.08583e-11	1	4.39025	4.39025	4.39025	4.39025	4.39025	4.39025	uc001bbe.1	1	-	19398603	19402005	3402	1	AX747516	Antisense	UCSC
p25638	1.22522e-05	1.41995e-09	1	4.39025	4.39025	4.39025	4.39025	4.39025	4.39025	uc001ben.1	1	-	21602542	21604868	2326	1	AX747766	Intronic	UCSC
p25642	1.99552e-05	3.86237e-08	1	4.39025	4.39025	4.39025	4.39025	4.39025	4.39025	uc001bxa.1	1	-	33607471	33608831	1360	1	AX747064	Intergenic	UCSC
p25643	4.84239e-06	0.991839	1	4.39025	4.39025	4.39025	4.39025	4.39025	4.39025	uc021oly.1	1	-	40222853	40225715	2862	1	AB075489	Intronic	UCSC
p25646	0.0180878	3.92866e-17	1	4.39025	4.39025	4.39025	4.39025	4.39025	4.39025	uc001ctg.1	1	-	52302636	52305398	2762	1	AK090844	Intronic	UCSC
p25647	1.42168e-10	0.00184758	1	4.39025	4.39025	4.39025	4.39025	4.39025	4.39025	uc001cyw.1	1	-	58933598	58934677	1079	1	AX746780	Intergenic	UCSC
p25660	5.19309e-10	1.11703e-13	1	4.39025	4.39025	4.39025	4.39025	4.39025	4.39025	uc010pmp.1	1	-	173387087	173430501	43414	2	BC136808	Intergenic	UCSC
p25661	7.42005e-09	7.8177e-07	1	4.39025	4.39025	4.39025	4.39025	4.39025	4.39025	uc001gwj.1	1	-	201332423	201333316	893	1	AK055533	Antisense	UCSC
p25670	4.79893e-10	6.1107e-07	1	4.39025	4.39025	4.39025	4.39025	4.39025	4.39025	uc001hto.1	1	-	229589676	229591617	1941	1	AX747652	Intronic	UCSC
p25675	8.42303e-09	0.335732	1	4.39025	4.39025	4.39025	4.39025	4.39025	4.39025	uc001aiu.1	1	+	2112574	2114663	2089	1	AX747530	Intronic	UCSC
p25679	0.362628	0.00277837	1	4.39025	4.39025	4.39025	4.39025	4.39025	4.39025	uc010oaz.1	1	+	11900375	11907674	7299	4	NPPA-AS1	Antisense	UCSC
p25685	6.21228e-13	0.00272968	1	4.39025	4.39025	4.39025	4.39025	4.39025	4.39025	uc001bzm.1	1	+	36391432	36395210	3778	1	AK025726	Intergenic	UCSC
p25686	0.0514667	0.00153971	1	4.39025	4.39025	4.39025	4.39025	4.39025	4.39025	uc001chr.3	1	+	43144356	43147330	2974	2	AF086102	Divergent	UCSC
p25687	4.37855e-05	0.774644	1	4.39025	4.39025	4.39025	4.39025	4.39025	4.39025	uc001cij.1	1	+	43323292	43354460	31168	4	BC043541	Intergenic	UCSC
p25689	0.00280431	4.5325e-09	1	4.39025	4.39025	4.39025	4.39025	4.39025	4.39025	uc001djh.1	1	+	84543635	84546350	2715	1	BC037304	Antisense	UCSC
p25690	5.8654e-07	3.09611e-06	1	4.39025	4.39025	4.39025	4.39025	4.39025	4.39025	uc001dqe.1	1	+	94317792	94319887	2095	1	AX746627	Intergenic	UCSC
p25691	1.99388e-05	2.1054e-11	1	4.39025	4.39025	4.39025	4.39025	4.39025	4.39025	uc001ebn.1	1	+	112256829	112259310	2481	1	AK023457	Divergent	UCSC
p25694	1.30693e-07	0.0125938	1	4.39025	4.39025	4.39025	4.39025	4.39025	4.39025	uc001eho.1	1	+	119683047	119694031	10984	4	BC063600	Antisense	UCSC
p25697	9.76686e-11	1.53665e-05	1	4.39025	4.39025	4.39025	4.39025	4.39025	4.39025	uc021ouz.1	1	+	145500506	145501669	1163	1	AK123675	Intronic	UCSC
p25704	7.68341e-08	1.53734e-06	1	4.39025	4.39025	4.39025	4.39025	4.39025	4.39025	uc001gdo.3	1	+	165738165	165744685	6520	3	BC071770	Divergent	UCSC
p25710	0.000510007	2.37164e-08	1	4.39025	4.39025	4.39025	4.39025	4.39025	4.39025	uc001gqz.1	1	+	184727265	184730133	2868	1	AX747662	Intergenic	UCSC
p25711	0.00188943	8.74757e-07	1	4.39025	4.39025	4.39025	4.39025	4.39025	4.39025	uc001hbc.3	1	+	204485506	204596131	110625	33	MDM4	Antisense	UCSC
p25712	9.629e-11	3.10136e-06	1	4.39025	4.39025	4.39025	4.39025	4.39025	4.39025	uc001hns.1	1	+	222906202	222908533	2331	1	AK025140	Divergent	UCSC
p263	0.0114133	2.0747e-14	1	4.39025	4.39025	4.39025	4.39025	4.39025	4.39025	ENST00000565575.1	1	-	87169184	87170145	961	1	ENSG00000261737.1	Divergent	ENSEMBL
p26584	1.79948e-05	2.51842e-06	1	4.39025	4.39025	4.39025	4.39025	4.39025	4.39025	HIT000218957	1	-	100924260	100924592	332	1	HIX0029731	Intronic	H-InvDB
p26591	5.29575e-07	0.451392	1	4.39025	4.39025	4.39025	4.39025	4.39025	4.39025	HIT000078763	1	-	227884732	227885408	676	2	HIX0028603	Intergenic	H-InvDB
p26594	3.85661e-06	1.3096e-06	1	4.39025	4.39025	4.39025	4.39025	4.39025	4.39025	HIT000095376	1	+	17028040	17032089	4049	3	HIX0029283	Intergenic	H-InvDB
p26597	1.45835e-05	2.20331e-09	1	4.39025	4.39025	4.39025	4.39025	4.39025	4.39025	HIT000217202	1	+	89647180	89647394	214	1	HIX0029728	Antisense	H-InvDB
p26600	3.3078e-05	6.60648e-09	1	4.39025	4.39025	4.39025	4.39025	4.39025	4.39025	HIT000078377	1	+	184431526	184431933	407	1	HIX0029052	Intronic	H-InvDB
p269	0.247215	1.4877e-06	1	4.39025	4.39025	4.39025	4.39025	4.39025	4.39025	ENST00000443562.1	1	-	90048799	90097750	48951	5	ENSG00000231999.2	Antisense	ENSEMBL
p26953	3.99035e-15	0.52545	1	4.39025	4.39025	4.39025	4.39025	4.39025	4.39025	uc.2-	1	-	10732542	10732749	207	1	uc.2-	Intronic	UCR
p26964	1.77257e-10	0.462014	1	4.39025	4.39025	4.39025	4.39025	4.39025	4.39025	uc.14-	1	-	38495003	38495216	213	1	uc.14-	Intergenic	UCR
p26973	2.27854e-08	4.70206e-15	1	4.39025	4.39025	4.39025	4.39025	4.39025	4.39025	uc.23-	1	-	51035776	51036005	229	1	uc.23-	Intronic	UCR
p26985	5.04322e-10	1.57476e-14	1	4.39025	4.39025	4.39025	4.39025	4.39025	4.39025	uc.36-	1	-	109240427	109240691	264	1	uc.36-	Intronic	UCR
p26989	4.4365e-11	2.2421e-13	1	4.39025	4.39025	4.39025	4.39025	4.39025	4.39025	uc.40-	1	-	164637961	164638208	247	1	uc.40-	Intronic	UCR
p26990	0.0011356	7.76437e-15	1	4.39025	4.39025	4.39025	4.39025	4.39025	4.39025	uc.41-	1	-	213598766	213598982	216	1	uc.41-	Intergenic	UCR
p26999	1.06319e-10	6.32519e-10	1	4.39025	4.39025	4.39025	4.39025	4.39025	4.39025	uc.6+	1	+	10795120	10795421	301	1	uc.6+	Intronic	UCR
p27001	0.0394331	0.000233235	1	4.39025	4.39025	4.39025	4.39025	4.39025	4.39025	uc.8+	1	+	10851817	10852033	216	1	uc.8+	Intronic	UCR
p27004	9.16584e-06	8.47268e-07	1	4.39025	4.39025	4.39025	4.39025	4.39025	4.39025	uc.12+	1	+	35650226	35650427	201	1	uc.12+	Intronic	UCR
p27006	0.460184	2.16075e-12	1	4.39025	4.39025	4.39025	4.39025	4.39025	4.39025	uc.14+	1	+	38495003	38495216	213	1	uc.14+	Intergenic	UCR
p27015	5.47298e-06	7.41746e-09	1	4.39025	4.39025	4.39025	4.39025	4.39025	4.39025	uc.23+	1	+	51035776	51036005	229	1	uc.23+	Intronic	UCR
p27020	0.0330475	5.92984e-12	1	4.39025	4.39025	4.39025	4.39025	4.39025	4.39025	uc.28+	1	+	70696712	70697067	355	1	uc.28+	Intronic	UCR
p27026	0.000262171	2.00057e-05	1	4.39025	4.39025	4.39025	4.39025	4.39025	4.39025	uc.36+	1	+	109240427	109240691	264	1	uc.36+	Intronic	UCR
p27033	0.00557647	0.00254221	1	4.39025	4.39025	4.39025	4.39025	4.39025	4.39025	uc.43+	1	+	243896034	243896291	257	1	uc.43+	Intronic	UCR
p27035	9.23903e-09	6.14337e-10	1	4.39025	4.39025	4.39025	4.39025	4.39025	4.39025	uc.46+	1	+	245017602	245017819	217	1	uc.46+	Antisense	UCR
p271	1.41042e-10	0.707798	1	4.39025	4.39025	4.39025	4.39025	4.39025	4.39025	ENST00000526694.1	1	-	90091819	90098306	6487	3	ENSG00000231999.2	Divergent	ENSEMBL
p278	0.0955815	3.71975e-07	1	4.39025	4.39025	4.39025	4.39025	4.39025	4.39025	ENST00000413606.1	1	-	93727742	93811388	83646	7	ENSG00000223745.2	Antisense	ENSEMBL
p279	1.29296e-09	0.948938	1	4.39025	4.39025	4.39025	4.39025	4.39025	4.39025	ENST00000414430.1	1	-	93730228	93780826	50598	4	ENSG00000223745.2	Antisense	ENSEMBL
p285	0.237455	0.167814	1	4.39025	4.39025	4.39025	4.39025	4.39025	4.39025	ENST00000449305.1	1	-	93804485	93811340	6855	5	ENSG00000223745.2	Divergent	ENSEMBL
p287	0.129969	2.20037e-08	1	4.39025	4.39025	4.39025	4.39025	4.39025	4.39025	ENST00000445076.1	1	-	93804495	93811384	6889	3	ENSG00000223745.2	Divergent	ENSEMBL
p28926	0.207542	1.3541e-06	1	4.39025	4.39025	4.39025	4.39025	4.39025	4.39025	ENST00000430109.1	1	-	1365918	1369953	4035	2	ENSG00000225285.1	Divergent	ENSEMBL
p28946	9.65914e-06	1.30065e-13	1	4.39025	4.39025	4.39025	4.39025	4.39025	4.39025	ENST00000437515.1	1	-	121102016	121139765	37749	4	ENSG00000230806.1	Antisense	ENSEMBL
p28951	0.757095	0.0239998	1	4.39025	4.39025	4.39025	4.39025	4.39025	4.39025	ENST00000422036.1	1	-	144276397	144311493	35096	5	ENSG00000235398.2	Intronic	ENSEMBL
p28955	9.9516e-05	3.82504e-12	1	4.39025	4.39025	4.39025	4.39025	4.39025	4.39025	ENST00000482381.1	1	-	146126403	146136197	9794	3	ENSG00000227733.3	Intronic	ENSEMBL
[truncated: 6,436 more rows]

## Sheet: Sheet1
ProbeName	FDR	P	FC(abs)	Mean signal intensities in sample 1	Mean signal intensities in sample 4	Mean signal intensities in sample 5	Mean signal intensities in sample 2	Mean signal intensities in sample 3	Mean signal intensities in sample 6	lncRNA ID	Chrosome	Strand	Start	End	Length	exoncount	gene	class	database
p5577	2.23538e-10	7.90976e-11	0.14551	341.244	44.22	632.934	75.6833	38.731	33.7724	ENST00000560613.1	15	+	52430624	52432443	1819	2	ENSG00000259709.1	Intronic	ENSEMBL
p15332	1.92409e-07	4.22208e-10	0.14859	407.632	776.786	221.151	29.0642	121.714	58.0752	ENST00000450016.1	7	+	44888657	44889164	507	2	ENSG00000234183.1	Divergent	ENSEMBL
p22861	0.0764331	0.0036112	0.185144	85.4599	175.219	56.1196	4.54962	5.46244	48.6414	TCONS_00011104	5	-	180253867	180255255	1388	2	XLOC_005110	Intergenic	HumanLincRNACatalog
p26400	8.03394e-07	1.21529e-05	0.238593	1100.63	1018.8	2309.05	712.181	28.1217	316.302	uc010lfo.1	7	-	96607658	96641361	33703	2	DLX6-AS1	Antisense	UCSC
p14054	5.29809e-05	1.33544e-06	0.239227	62.1425	598.822	183.218	29.331	139.898	32.7225	ENST00000514793.1	5	+	179085236	179091433	6197	3	ENSG00000250999.1	Intergenic	ENSEMBL
p1310	0.0134604	5.41699e-06	0.247269	124.077	466.089	60.2922	17.8009	113.427	29.6099	ENST00000424735.1	1	+	190448135	190449865	1730	2	ENSG00000237457.2	Intergenic	ENSEMBL
p30329	0.00266123	1.7642e-07	0.251706	1020.57	699.655	383.074	288.508	59.9358	180.969	NR_034002.1	13	-	113621797	113622952	1155	1	MCF2L-AS1	Divergent	RefSeq
p15416	9.6222e-11	0.0176314	0.260018	1109.28	835.467	2488.66	171.479	66.2769	915.009	ENST00000376482.3	7	+	99728586	99738062	9476	2	ENSG00000235077.1	Intergenic	ENSEMBL
p20984	6.94798e-06	0.0286541	0.262613	92.7272	164.845	119.569	1.31382	31.026	66.7023	TCONS_00004578	2	-	217929530	217931700	2170	2	XLOC_002488	Intergenic	HumanLincRNACatalog
p15299	2.36338e-05	0.901974	0.311954	148.13	1344.39	60.1382	346.436	16.547	121.373	ENST00000518886.1	7	+	27286986	27290112	3126	2	ENSG00000253324.1	Divergent	ENSEMBL
p8905	0.00212241	1.46553e-07	4.00572	299.218	41.3281	7.56458	494.933	496.526	402.973	ENST00000415700.1	2	-	780347	863877	83530	3	ENSG00000237667.1	Intergenic	ENSEMBL
p10851	1.36791e-06	0.000263614	4.19257	726.251	95.8073	36.4325	465.861	887.186	2246.24	ENST00000429843.1	21	+	30868366	30872706	4340	2	ENSG00000234293.1	Intergenic	ENSEMBL
p1286	7.03163e-06	0.0124202	4.41432	98.6496	173.383	57.2583	347.114	225.853	880.625	ENST00000434447.1	1	+	180875786	180878302	2516	4	ENSG00000225857.1	Intergenic	ENSEMBL
p12048	9.62215e-11	0.000737179	4.85472	1216.24	295.715	1482.48	3118.09	1333.84	10085.2	ENST00000472913.1	3	+	155203591	155204910	1319	2	ENSG00000242925.1	Intronic	ENSEMBL
p30194	1.66198e-08	2.87929e-12	5.33579	1096.83	183.866	687.076	5327.85	1395.16	3776.63	uc001vdo.1	13	-	50556687	50699677	142990	14	DLEU2	Antisense	UCSC
p33689	9.62409e-11	2.67457e-10	5.45692	1843.68	147.367	955.599	6680.89	8195.84	1202.9	NR_047652.1	19	+	1076632	1086627	9995	13	HMHA1	Antisense	RefSeq
p2863	0.664291	2.76998e-05	6.58151	2361.01	62.2105	625.696	6981.36	8378.07	4707.06	ENST00000527321.1	11	+	77850860	77852968	2108	2	ENSG00000246174.3	Divergent	ENSEMBL
p30187	2.99478e-08	3.18691e-06	6.71775	709.495	52.0851	131.906	4024.76	1024.81	952.645	uc001ldk.2	10	+	119806331	119815736	9405	4	CASC2	Divergent	UCSC
p1335	7.07517e-09	5.25719e-13	7.28682	127.29	36.1151	116.023	861.7	632.347	542.097	ENST00000428573.1	1	+	202573395	202574421	1026	2	ENSG00000226862.1	Antisense	ENSEMBL
p25579	9.82175e-08	2.79108e-06	7.39614	486.913	71.1714	134.845	1631.48	2461.44	1032.08	NR_027294.1	9	+	38621084	38623281	2197	2	FAM201A	Divergent	RefSeq
