# Supplementary material for: Long Noncoding RNA FAM201A Mediates the Radiosensitivity of Esophageal Squamous Cell Cancer by Regulating ATM and mTOR Expression via miR-101
Source: Front Genet. 2018 Dec 5;9:611. doi: 10.3389/fgene.2018.00611 (PMC6292217; doi:10.3389/fgene.2018.00611)
Supplement: File S1 — Results of lncRNA chip microarray. [file Data_Sheet_1.ZIP › Supplementary File/Supplementary file 1--Results of lncRNA chip microarray/12002_2017_06_lncRNA raw-data.xls]

## Sheet: lncRNA
# Fold Change cut-off: 2.0 , p<0.05
# Condition pairs: sample2,3,6 vs sample1,4,5
# Column A: ProbeName, it represents probe name.
# Column B: FDR, corrected p-value calcualted by Multiple Testing Correction.
# Column C: P-value calculated from Paired T -Test.
# Column D: Fold change, the absolute ratio (no log scale) of intensities between two conditions.
# Column E: geometric mean of intensity of each probe in sample1
# Column F: geometric mean of intensity of each probe in sample4
# Column G: geometric mean of intensity of each probe in sample5
# Column H: geometric mean of intensity of each probe in sample2
# Column I: geometric mean of intensity of each probe in sample3
# Column J: geometric mean of intensity of each probe in sample6
# Column K~T: Annotations to each probe, including database_ID/chromosome_location, lncRNA_strand, start and end position, length, gene symbol, lncRNA class DATABASE source.
ProbeName	FDR	P	FC(abs)	Mean signal intensities in sample 1	Mean signal intensities in sample 4	Mean signal intensities in sample 5	Mean signal intensities in sample 2	Mean signal intensities in sample 3	Mean signal intensities in sample 6	lncRNA ID	Chrosome	Strand	Start	End	Length	exoncount	gene	class	database
p10	9.62215e-11	2.16368e-16	1	4.39025	4.39025	4.39025	4.39025	4.39025	4.39025	ENST00000440196.2	1	-	529832	530597	765	2	ENSG00000239664.2	Intergenic	ENSEMBL
p1007	0.924543	7.61231e-08	1	4.39025	4.39025	4.39025	4.39025	4.39025	4.39025	ENST00000450461.1	1	+	71514537	71532867	18330	2	ENSG00000235079.1	Antisense	ENSEMBL
p1010	0.000889568	0.000137563	0.828898	63.0702	38.6259	48.3776	6.53692	67.604	50.2548	ENST00000599146.1	1	+	71547032	71873367	326335	9	ENSG00000229956.4	Antisense	ENSEMBL
p1013	8.54606e-06	3.44586e-26	0.752351	61.5392	65.056	80.3517	23.0829	97.6574	34.9564	ENST00000594152.1	1	+	71547049	71873367	326318	6	ENSG00000229956.4	Antisense	ENSEMBL
p1015	0.00335042	2.40154e-09	1	4.39025	4.39025	4.39025	4.39025	4.39025	4.39025	ENST00000600103.1	1	+	71667770	71873362	205592	8	ENSG00000229956.4	Antisense	ENSEMBL
p1018	9.14039e-08	4.13002e-18	1	4.39025	4.39025	4.39025	4.39025	4.39025	4.39025	ENST00000587306.1	1	+	71873315	71934193	60878	3	ENSG00000229956.4	Intronic	ENSEMBL
p102	0.000860073	0.503148	1	4.39025	4.39025	4.39025	4.39025	4.39025	4.39025	ENST00000451424.1	1	-	20969149	20978686	9537	3	ENSG00000117242.7	Antisense	ENSEMBL
p1022	0.00522554	1.42639e-18	1	4.39025	4.39025	4.39025	4.39025	4.39025	4.39025	ENST00000591654.1	1	+	71929091	71955586	26495	6	ENSG00000229956.4	Intronic	ENSEMBL
p1039	0.000184352	2.28871e-15	1	4.39025	4.39025	4.39025	4.39025	4.39025	4.39025	ENST00000436742.1	1	+	78695282	78759574	64292	6	ENSG00000237413.1	Intergenic	ENSEMBL
p1041	0.321696	1.06979e-09	1	4.39025	4.39025	4.39025	4.39025	4.39025	4.39025	ENST00000418041.1	1	+	81001439	81112473	111034	3	ENSG00000234184.1	Intergenic	ENSEMBL
p1043	0.000213941	0.000594838	1.87602	396.554	7.53033	433.698	759.125	752.878	59.6919	ENST00000443565.1	1	+	81106968	81112473	5505	3	ENSG00000234184.1	Intergenic	ENSEMBL
p1044	0.0221151	2.35464e-05	1	4.39025	4.39025	4.39025	4.39025	4.39025	4.39025	ENST00000439024.1	1	+	81970783	81971981	1198	2	ENSG00000227960.1	Intergenic	ENSEMBL
p1046	0.0110153	1.45049e-12	0.651637	136.723	162.891	92.5877	104.305	0.953976	150.314	ENST00000419658.1	1	+	83373244	83463244	90000	4	ENSG00000230817.1	Intergenic	ENSEMBL
p105	0.000537939	5.99775e-07	1.35217	164.846	119.221	32.3024	54.5666	190.391	182.828	ENST00000427154.1	1	-	23346639	23414551	67912	2	ENSG00000240553.1	Antisense	ENSEMBL
p1052	5.47163e-06	8.96978e-19	1	4.39025	4.39025	4.39025	4.39025	4.39025	4.39025	ENST00000587165.1	1	+	87597737	87627820	30083	3	ENSG00000267272.1	Intergenic	ENSEMBL
p1054	9.42481e-06	0.00273881	1	4.39025	4.39025	4.39025	4.39025	4.39025	4.39025	ENST00000429074.1	1	+	90095283	90141945	46662	4	ENSG00000230735.1	Antisense	ENSEMBL
p1056	2.96479e-09	1.26215e-09	1	4.39025	4.39025	4.39025	4.39025	4.39025	4.39025	ENST00000425185.1	1	+	91317315	91319843	2528	2	ENSG00000225446.1	Intergenic	ENSEMBL
p1057	0.00281132	1.41306e-08	1	4.39025	4.39025	4.39025	4.39025	4.39025	4.39025	ENST00000564442.1	1	+	92864530	92867613	3083	1	ENSG00000261311.1	Intergenic	ENSEMBL
p1060	3.25236e-07	8.19723e-11	1	4.39025	4.39025	4.39025	4.39025	4.39025	4.39025	ENST00000417401.1	1	+	94057806	94071130	13324	3	ENSG00000224093.1	Antisense	ENSEMBL
p1061	1.13388e-11	1.87146e-12	1	4.39025	4.39025	4.39025	4.39025	4.39025	4.39025	ENST00000412628.1	1	+	94059941	94066319	6378	2	ENSG00000224093.1	Intronic	ENSEMBL
p1067	2.22348e-11	0.000214526	1.00377	283.644	292.885	305.768	217.706	94.395	573.523	ENST00000434207.1	1	+	95585702	95604110	18408	2	ENSG00000231992.1	Intronic	ENSEMBL
p1072	1.0472e-10	3.5097e-14	1	4.39025	4.39025	4.39025	4.39025	4.39025	4.39025	ENST00000422980.1	1	+	97561478	97788511	227033	5	ENSG00000232878.1	Antisense	ENSEMBL
p1073	3.60141e-07	5.9864e-10	1	4.39025	4.39025	4.39025	4.39025	4.39025	4.39025	ENST00000431362.1	1	+	98262476	98263424	948	2	ENSG00000235777.1	Intronic	ENSEMBL
p1078	1.25379e-08	4.29291e-17	1	4.39025	4.39025	4.39025	4.39025	4.39025	4.39025	ENST00000414686.1	1	+	101461028	101461816	788	2	ENSG00000235795.1	Intronic	ENSEMBL
p1079	0.000164894	0.324396	1	4.39025	4.39025	4.39025	4.39025	4.39025	4.39025	ENST00000453011.1	1	+	101491433	101546118	54685	5	ENSG00000233184.1	Divergent	ENSEMBL
p108	5.58147e-08	3.74987e-05	1	4.39025	4.39025	4.39025	4.39025	4.39025	4.39025	ENST00000427796.1	1	-	24086871	24104777	17906	4	ENSG00000236810.1	Antisense	ENSEMBL
p1082	0.837206	2.0121e-15	1	4.39025	4.39025	4.39025	4.39025	4.39025	4.39025	ENST00000561748.1	1	+	101708713	101709305	592	1	ENSG00000260940.1	Intergenic	ENSEMBL
p1085	7.95667e-06	0.0182316	1	4.39025	4.39025	4.39025	4.39025	4.39025	4.39025	ENST00000444327.1	1	+	101815604	101855859	40255	2	ENSG00000231671.1	Intergenic	ENSEMBL
p1088	0.275485	0.0919643	1.28258	1053.1	583.301	152.558	1087.41	165.376	1041.69	ENST00000418362.1	1	+	104615644	104619709	4065	2	ENSG00000215869.3	Intergenic	ENSEMBL
p109	2.40494e-06	1.04096e-17	1.23498	327.918	257.787	167.791	408.793	61.097	460.665	ENST00000447961.1	1	-	24098100	24098887	787	3	ENSG00000236810.1	Intergenic	ENSEMBL
p1092	2.55742e-11	5.21667e-22	1	4.39025	4.39025	4.39025	4.39025	4.39025	4.39025	ENST00000438318.1	1	+	108507064	108537229	30165	3	ENSG00000230489.1	Antisense	ENSEMBL
p1093	0.206342	5.57238e-07	1	4.39025	4.39025	4.39025	4.39025	4.39025	4.39025	ENST00000564063.1	1	+	108742547	108744113	1566	1	ENSG00000260879.1	Antisense	ENSEMBL
p11	1.84049e-10	2.07576e-05	1	4.39025	4.39025	4.39025	4.39025	4.39025	4.39025	ENST00000357876.5	1	-	529838	532878	3040	2	ENSG00000239664.2	Intergenic	ENSEMBL
p1100	0.00119434	2.04722e-19	1.25757	1112.95	257.502	1462.51	675.301	964.271	1923.08	ENST00000436416.1	1	+	110138846	110140403	1557	2	ENSG00000225113.1	Divergent	ENSEMBL
p1106	0.821041	2.36321e-15	0.938866	313.14	222.278	463.42	349.975	271.076	316.724	ENST00000554749.1	1	+	110600961	110605177	4216	1	ENSG00000258634.2	Antisense	ENSEMBL
p1107	0.0194287	6.90797e-19	1	4.39025	4.39025	4.39025	4.39025	4.39025	4.39025	ENST00000596959.1	1	+	110603483	110603939	456	1	ENSG00000258634.2	Antisense	ENSEMBL
p1111	0.00275224	2.24908e-07	1	4.39025	4.39025	4.39025	4.39025	4.39025	4.39025	ENST00000587691.1	1	+	110950461	110955120	4659	2	ENSG00000224699.3	Antisense	ENSEMBL
p1116	6.17384e-05	1.62336e-19	1.16251	1311.1	72.0745	343.553	481.723	392.214	1133.39	ENST00000440689.1	1	+	111486088	111495470	9382	2	ENSG00000232811.1	Antisense	ENSEMBL
p1117	0.00470324	2.39082e-07	1	4.39025	4.39025	4.39025	4.39025	4.39025	4.39025	ENST00000524935.1	1	+	112282474	112289235	6761	2	ENSG00000227811.2	Intronic	ENSEMBL
p1118	0.000462567	0.16893	1.14672	81.3775	83.7091	15.8417	66.5935	96.0682	44.8119	ENST00000441125.1	1	+	112451957	112452783	826	3	ENSG00000237556.1	Intronic	ENSEMBL
p1119	1.34069e-08	3.49476e-15	1	4.39025	4.39025	4.39025	4.39025	4.39025	4.39025	ENST00000508462.1	1	+	112999439	113006078	6639	2	ENSG00000248201.1	Antisense	ENSEMBL
p112	1.45548e-05	0.00498082	1	4.39025	4.39025	4.39025	4.39025	4.39025	4.39025	ENST00000577528.1	1	-	24865291	24882515	17224	3	ENSG00000264443.1	Divergent	ENSEMBL
p1121	1.19808e-08	0.497134	1.4507	714.158	858.552	344.536	424.881	955.283	1401.19	ENST00000416193.1	1	+	113499036	113506694	7658	3	ENSG00000226419.1	Divergent	ENSEMBL
p1123	1.80055e-13	6.70334e-14	1	4.39025	4.39025	4.39025	4.39025	4.39025	4.39025	ENST00000428411.1	1	+	113499082	113511609	12527	3	ENSG00000226419.1	Divergent	ENSEMBL
p1125	0.000214361	0.612223	1	4.39025	4.39025	4.39025	4.39025	4.39025	4.39025	ENST00000429398.1	1	+	114355000	114366118	11118	4	ENSG00000231128.1	Antisense	ENSEMBL
p1126	0.00889789	7.58568e-05	0.861386	79.0163	88.8663	79.239	92.9388	63.4273	56.5009	ENST00000418238.1	1	+	114355229	114358098	2869	3	ENSG00000231128.1	Antisense	ENSEMBL
p1127	4.57769e-06	1.04798e-05	0.644204	106.31	120.641	68.7235	41.1089	7.16721	142.198	ENST00000448199.1	1	+	114366034	114371793	5759	2	ENSG00000231128.1	Antisense	ENSEMBL
p1128	0.0936546	0.00186881	1	4.39025	4.39025	4.39025	4.39025	4.39025	4.39025	ENST00000419536.1	1	+	114399256	114443859	44603	5	ENSG00000226167.1	Antisense	ENSEMBL
p1129	3.19527e-08	4.9408e-07	1	4.39025	4.39025	4.39025	4.39025	4.39025	4.39025	ENST00000448680.1	1	+	115642292	115645279	2987	2	ENSG00000233730.1	Intergenic	ENSEMBL
p1137	1.98791e-10	0.026389	1	4.39025	4.39025	4.39025	4.39025	4.39025	4.39025	ENST00000445565.1	1	+	119689031	119689656	625	2	ENSG00000231365.1	Intergenic	ENSEMBL
p1141	0.212588	0.00500145	1	4.39025	4.39025	4.39025	4.39025	4.39025	4.39025	ENST00000457996.1	1	+	120925633	120933000	7367	2	ENSG00000233029.3	Antisense	ENSEMBL
p1142	1.99037e-10	1.33386e-09	1.09098	634.571	445.795	108.013	599.119	379.296	318.077	ENST00000602412.1	1	+	121133255	121134581	1326	1	ENSG00000269996.1	Intergenic	ENSEMBL
p1144	0.715464	4.88956e-11	1.34078	87.9167	8.90411	9.04732	32.6777	63.0893	46.1791	ENST00000445260.1	1	+	121166922	121171134	4212	3	ENSG00000231429.1	Intergenic	ENSEMBL
p1150	0.00124208	0.00463761	1	4.39025	4.39025	4.39025	4.39025	4.39025	4.39025	ENST00000447407.1	1	+	143119060	143231756	112696	4	ENSG00000230850.2	Intergenic	ENSEMBL
p1151	0.058751	1.00938e-14	1.13571	295.96	467.579	124.753	341.111	366.263	301.467	ENST00000428930.1	1	+	143119060	143232318	113258	3	ENSG00000230850.2	Intergenic	ENSEMBL
p1153	4.12941e-08	0.375121	1.54473	3223.38	4358.76	1478.02	2157.53	3680.91	8157.05	ENST00000424474.1	1	+	143154492	143169960	15468	2	ENSG00000237291.1	Intergenic	ENSEMBL
p1155	5.55129e-07	4.60788e-14	0.967969	291.763	478.268	493.161	93.923	403.102	725.706	ENST00000424820.1	1	+	143347957	143365041	17084	7	ENSG00000242569.1	Intergenic	ENSEMBL
p116	2.90827e-12	0.0764937	0.5741	40.0013	33.3916	43.7808	21.3188	12.3938	33.5568	ENST00000436991.1	1	-	25971034	25985602	14568	2	ENSG00000233478.1	Intronic	ENSEMBL
p1165	0.427505	4.28974e-09	1	4.39025	4.39025	4.39025	4.39025	4.39025	4.39025	ENST00000457439.1	1	+	143687151	143713485	26334	4	ENSG00000231734.3	Intergenic	ENSEMBL
p1166	0.00822681	6.59099e-09	1	4.39025	4.39025	4.39025	4.39025	4.39025	4.39025	ENST00000426533.1	1	+	143687157	143712593	25436	7	ENSG00000231734.3	Intergenic	ENSEMBL
p1168	9.62473e-11	2.63545e-17	1	4.39025	4.39025	4.39025	4.39025	4.39025	4.39025	ENST00000532137.1	1	+	144858173	144865800	7627	3	ENSG00000255148.1	Intronic	ENSEMBL
p117	0.224925	2.45977e-21	0.99026	767.738	264.298	959.956	319.781	958.454	694.356	ENST00000442055.1	1	-	26143239	26146263	3024	4	ENSG00000228172.1	Antisense	ENSEMBL
p1172	3.07436e-07	2.53586e-12	1	4.39025	4.39025	4.39025	4.39025	4.39025	4.39025	ENST00000415065.1	1	+	145541592	145542229	637	2	ENSG00000244619.1	Intronic	ENSEMBL
p1175	1.13589e-05	2.70009e-05	1	4.39025	4.39025	4.39025	4.39025	4.39025	4.39025	ENST00000431525.1	1	+	147169913	147171461	1548	2	ENSG00000227139.1	Intergenic	ENSEMBL
p1176	1.53547e-06	1.56947e-15	1	4.39025	4.39025	4.39025	4.39025	4.39025	4.39025	ENST00000428911.1	1	+	147229425	147230517	1092	2	ENSG00000234482.1	Antisense	ENSEMBL
p1177	6.54387e-06	0.641827	1.00232	62.1916	56.1095	14.2646	77.5613	7.83696	47.4744	ENST00000426504.1	1	+	147249699	147261065	11366	2	ENSG00000234190.1	Intergenic	ENSEMBL
p1181	5.19641e-06	0.822574	0.859466	85.6085	1.14994	88.59	45.3128	31.8941	73.499	ENST00000597931.1	1	+	147635155	147647162	12007	3	ENSG00000232265.2	Intronic	ENSEMBL
p119	4.72629e-14	2.87004e-17	1	4.39025	4.39025	4.39025	4.39025	4.39025	4.39025	ENST00000448923.1	1	-	26496982	26498312	1330	3	ENSG00000236782.1	Antisense	ENSEMBL
p1191	0.409142	0.00544737	1	4.39025	4.39025	4.39025	4.39025	4.39025	4.39025	ENST00000443018.1	1	+	149230715	149232554	1839	2	ENSG00000232721.1	Intergenic	ENSEMBL
p1192	0.000243966	0.00237837	1.04856	1421.53	1023.09	978.187	1073.03	304.922	2211.06	ENST00000457216.2	1	+	149239530	149245181	5651	4	ENSG00000223779.4	Intergenic	ENSEMBL
p1194	5.59023e-08	0.233742	0.929363	3236.64	4192.67	3864.16	3288.98	4466.02	2740.75	ENST00000439719.1	1	+	149245049	149245801	752	2	ENSG00000223779.4	Intergenic	ENSEMBL
p1204	0.0165614	4.30911e-09	1	4.39025	4.39025	4.39025	4.39025	4.39025	4.39025	ENST00000434112.1	1	+	151512991	151534331	21340	2	ENSG00000232536.1	Intronic	ENSEMBL
p1206	0.00215459	0.0244251	1.28708	211.346	43.8979	187.336	63.6341	192.074	313.928	ENST00000457548.1	1	+	151673501	151680862	7361	2	ENSG00000227045.1	Antisense	ENSEMBL
p1207	1.00662e-10	1.21675e-06	1	4.39025	4.39025	4.39025	4.39025	4.39025	4.39025	ENST00000601684.1	1	+	151728016	151732387	4371	2	ENSG00000269621.1	Antisense	ENSEMBL
p1209	2.89283e-09	3.95594e-07	1.47666	314.312	231.505	108.651	139.184	356.077	471.167	ENST00000601909.1	1	+	151770529	151771078	549	1	ENSG00000269489.1	Intergenic	ENSEMBL
p1210	0.470382	0.334348	0.983908	610.956	660.001	512.117	121.793	916.791	715.797	ENST00000434182.1	1	+	151814352	151822861	8509	3	ENSG00000234614.1	Antisense	ENSEMBL
p1211	0.366797	6.76594e-06	1.17852	88.4284	38.3354	51.835	79.5198	87.576	43.3864	ENST00000429230.1	1	+	152095009	152097541	2532	2	ENSG00000226716.1	Intergenic	ENSEMBL
p1213	6.45725e-11	0.403826	1	4.39025	4.39025	4.39025	4.39025	4.39025	4.39025	ENST00000420707.1	1	+	152161826	152313586	151760	9	ENSG00000237975.2	Antisense	ENSEMBL
p1218	0.000118338	5.77859e-08	1	4.39025	4.39025	4.39025	4.39025	4.39025	4.39025	ENST00000444515.1	1	+	152627952	152629280	1328	3	ENSG00000176075.6	Intergenic	ENSEMBL
p122	0.00346718	0.00284362	1	4.39025	4.39025	4.39025	4.39025	4.39025	4.39025	ENST00000425205.1	1	-	27555596	27560843	5247	3	ENSG00000224311.1	Divergent	ENSEMBL
p1221	2.33535e-07	0.172912	1	4.39025	4.39025	4.39025	4.39025	4.39025	4.39025	ENST00000413826.1	1	+	153653276	153654268	992	2	ENSG00000244484.1	Antisense	ENSEMBL
p1223	4.69661e-07	0.000441962	1.13308	614.162	835.057	343.073	18.0672	921.027	1091.72	ENST00000506037.1	1	+	155108372	155109607	1235	2	ENSG00000250784.1	Antisense	ENSEMBL
p1235	0.000237183	0.000575191	1	4.39025	4.39025	4.39025	4.39025	4.39025	4.39025	ENST00000453692.1	1	+	157661551	157666249	4698	2	ENSG00000227217.1	Antisense	ENSEMBL
p1245	4.84697e-07	0.000130792	1.27202	703.547	919.418	158.798	570.137	95.829	1600.48	ENST00000588034.1	1	+	160643311	160653698	10387	3	ENSG00000228863.3	Antisense	ENSEMBL
p1247	0.000327345	1.82918e-17	1	4.39025	4.39025	4.39025	4.39025	4.39025	4.39025	ENST00000437833.1	1	+	161337811	161341754	3943	2	ENSG00000235477.1	Divergent	ENSEMBL
p1254	2.16338e-13	9.24655e-10	1.07544	300.809	223.719	93.9867	70.9069	54.9283	539.338	ENST00000426178.1	1	+	165187651	165188284	633	2	ENSG00000238022.1	Intronic	ENSEMBL
p126	0.567024	0.0100602	1	4.39025	4.39025	4.39025	4.39025	4.39025	4.39025	ENST00000474814.1	1	-	28905050	28908383	3333	3	ENSG00000197989.8	Antisense	ENSEMBL
p1260	6.00165e-06	3.41272e-17	0.839643	62.9846	42.1528	20.7603	28.9282	27.2314	49.5494	ENST00000451992.1	1	+	167596621	167599911	3290	2	ENSG00000241666.1	Antisense	ENSEMBL
p127	0.327783	1.99743e-07	1	4.39025	4.39025	4.39025	4.39025	4.39025	4.39025	ENST00000464115.1	1	-	28906846	28908365	1519	3	ENSG00000197989.8	Intergenic	ENSEMBL
p1274	1.07728e-07	2.84868e-09	1	4.39025	4.39025	4.39025	4.39025	4.39025	4.39025	ENST00000414890.1	1	+	174866094	174867133	1039	2	ENSG00000223525.1	Intronic	ENSEMBL
p1277	0.328974	1.17924e-12	1	4.39025	4.39025	4.39025	4.39025	4.39025	4.39025	ENST00000426030.2	1	+	175986412	175987896	1484	2	ENSG00000228686.2	Intronic	ENSEMBL
p1278	4.68578e-08	2.78028e-12	1	4.39025	4.39025	4.39025	4.39025	4.39025	4.39025	ENST00000456125.1	1	+	176176783	176198466	21683	3	ENSG00000236021.1	Divergent	ENSEMBL
p1279	0.0109181	3.28898e-14	1	4.39025	4.39025	4.39025	4.39025	4.39025	4.39025	ENST00000454327.1	1	+	176477903	176478979	1076	2	ENSG00000230220.1	Intronic	ENSEMBL
p128	2.45084e-09	2.57467e-05	1	4.39025	4.39025	4.39025	4.39025	4.39025	4.39025	ENST00000461832.1	1	-	28906870	28908369	1499	3	ENSG00000197989.8	Intergenic	ENSEMBL
p1286	7.03163e-06	0.0124202	4.41432	98.6496	173.383	57.2583	347.114	225.853	880.625	ENST00000434447.1	1	+	180875786	180878302	2516	4	ENSG00000225857.1	Intergenic	ENSEMBL
p129	4.81922e-06	3.18709e-08	1	4.39025	4.39025	4.39025	4.39025	4.39025	4.39025	ENST00000418471.1	1	-	29196994	29203848	6854	3	ENSG00000233427.1	Intergenic	ENSEMBL
p1290	0.00128833	4.83107e-13	1.79925	84.3265	0.685537	63.3882	96.2509	84.9064	85.8515	ENST00000367563.3	1	+	182376755	182383950	7195	4	ENSG00000203729.4	Intergenic	ENSEMBL
p130	2.72452e-06	0.149445	1.89792	85.8222	31.0868	5.06121	25.1634	97.9675	108.359	ENST00000413004.1	1	-	29471005	29473506	2501	3	ENSG00000225750.1	Divergent	ENSEMBL
p1308	3.81441e-08	2.75378e-12	1.29331	87.8941	19.8963	66.0825	55.8628	99.4232	69.5852	ENST00000452178.1	1	+	190234027	190331400	97373	5	ENSG00000225811.1	Antisense	ENSEMBL
p131	1.25075e-05	3.90554e-13	1.81542	4.39025	4.39025	4.39025	4.39025	4.39025	15.1299	ENST00000417651.1	1	-	29656131	29676626	20495	3	ENSG00000230523.1	Intergenic	ENSEMBL
p1310	0.0134604	5.41699e-06	0.247269	124.077	466.089	60.2922	17.8009	113.427	29.6099	ENST00000424735.1	1	+	190448135	190449865	1730	2	ENSG00000237457.2	Intergenic	ENSEMBL
p1330	0.536447	3.131e-06	1.75247	10188.7	70.2793	634.039	3771.48	2716.52	12601.7	ENST00000454651.1	1	+	201476368	201502736	26368	2	ENSG00000224536.1	Antisense	ENSEMBL
p1332	3.31317e-12	1.48258e-05	1	4.39025	4.39025	4.39025	4.39025	4.39025	4.39025	ENST00000414927.1	1	+	201862969	201869106	6137	3	ENSG00000223774.1	Antisense	ENSEMBL
p1335	7.07517e-09	5.25719e-13	7.28682	127.29	36.1151	116.023	861.7	632.347	542.097	ENST00000428573.1	1	+	202573395	202574421	1026	2	ENSG00000226862.1	Antisense	ENSEMBL
p1337	1.00755e-10	2.06422e-07	1	4.39025	4.39025	4.39025	4.39025	4.39025	4.39025	ENST00000553157.1	1	+	202780081	202781284	1203	2	ENSG00000228288.2	Intergenic	ENSEMBL
p1339	9.62769e-11	0.0501888	1	4.39025	4.39025	4.39025	4.39025	4.39025	4.39025	ENST00000433008.1	1	+	203256897	203257662	765	3	ENSG00000231507.1	Intergenic	ENSEMBL
p1345	1.64846e-08	6.98367e-15	1	4.39025	4.39025	4.39025	4.39025	4.39025	4.39025	ENST00000444037.1	1	+	204595902	204598840	2938	2	ENSG00000240219.1	Intronic	ENSEMBL
p1351	2.31046e-06	1.24435e-05	1	4.39025	4.39025	4.39025	4.39025	4.39025	4.39025	ENST00000562504.1	1	+	206677280	206677789	509	1	ENSG00000261000.1	Intergenic	ENSEMBL
p1357	4.86157e-09	0.00235612	0.944244	83.7061	8.70185	90.7865	8.55978	80.5663	83.8542	ENST00000443636.1	1	+	209541006	209553035	12029	5	ENSG00000231648.1	Intergenic	ENSEMBL
p1362	9.84021e-11	1.91581e-20	1	4.39025	4.39025	4.39025	4.39025	4.39025	4.39025	ENST00000534914.1	1	+	211556144	211570206	14062	5	ENSG00000153363.8	Intergenic	ENSEMBL
p1368	4.50105e-06	7.04308e-08	0.5913	61.1792	74.5088	9.30794	22.3831	30.7798	32.5733	ENST00000412871.1	1	+	211813036	211827923	14887	2	ENSG00000227764.1	Intergenic	ENSEMBL
p1372	1.16949e-07	0.0702902	1.57434	46.7097	27.9017	34.3114	89.5459	64.6823	17.2529	ENST00000457272.1	1	+	212003187	212019783	16596	4	ENSG00000229258.1	Antisense	ENSEMBL
p1378	3.12166e-08	0.250915	1	4.39025	4.39025	4.39025	4.39025	4.39025	4.39025	ENST00000447949.1	1	+	212530759	212531695	936	2	ENSG00000229832.1	Intronic	ENSEMBL
p138	5.01782e-10	2.4483e-12	1	4.39025	4.39025	4.39025	4.39025	4.39025	4.39025	ENST00000453837.1	1	-	32307619	32321169	13550	2	ENSG00000203620.2	Intergenic	ENSEMBL
p1380	0.00950297	2.2189e-14	1.0544	64.4607	8.72138	13.4926	26.9888	16.0121	48.3889	ENST00000564287.1	1	+	212731174	212733073	1899	1	ENSG00000260805.1	Intergenic	ENSEMBL
p1381	0.598563	0.0239862	1	4.39025	4.39025	4.39025	4.39025	4.39025	4.39025	ENST00000417161.1	1	+	213665643	213719790	54147	2	ENSG00000225233.1	Intergenic	ENSEMBL
p139	1.33626e-10	4.55718e-05	1.02472	1376	1312.64	1410.67	199.039	1082.17	2919.43	ENST00000602889.1	1	-	32317513	32387442	69929	2	ENSG00000269967.1	Antisense	ENSEMBL
p1396	0.000387423	4.02601e-12	1	4.39025	4.39025	4.39025	4.39025	4.39025	4.39025	ENST00000441160.1	1	+	222139751	222158306	18555	3	ENSG00000228437.1	Intergenic	ENSEMBL
p1397	7.60168e-07	0.0744934	0.966977	116.417	189.634	8.59306	154.97	23.7682	125.515	ENST00000441835.1	1	+	222763166	222765828	2662	2	ENSG00000225265.1	Antisense	ENSEMBL
p1399	0.00321731	0.139051	1	4.39025	4.39025	4.39025	4.39025	4.39025	4.39025	ENST00000413074.1	1	+	222763303	222766374	3071	2	ENSG00000225265.1	Divergent	ENSEMBL
p1401	0.397042	0.614668	1	4.39025	4.39025	4.39025	4.39025	4.39025	4.39025	ENST00000457955.1	1	+	222988388	223010571	22183	5	ENSG00000228106.1	Antisense	ENSEMBL
p1402	0.528475	1.65811e-06	1	4.39025	4.39025	4.39025	4.39025	4.39025	4.39025	ENST00000444858.1	1	+	222988392	223010726	22334	4	ENSG00000228106.1	Antisense	ENSEMBL
p1403	0.465981	0.078021	1	4.39025	4.39025	4.39025	4.39025	4.39025	4.39025	ENST00000435378.1	1	+	222988401	223010724	22323	5	ENSG00000228106.1	Antisense	ENSEMBL
p1406	6.14317e-06	3.74234e-13	0.867715	62.8224	91.7482	9.94352	59.4012	21.0214	62.3288	ENST00000435108.1	1	+	223317390	223318296	906	2	ENSG00000236846.1	Divergent	ENSEMBL
p1407	1.01978e-10	5.64167e-05	1	4.39025	4.39025	4.39025	4.39025	4.39025	4.39025	ENST00000446145.1	1	+	223354485	223361496	7011	3	ENSG00000226601.1	Intergenic	ENSEMBL
p1408	0.0549239	0.000593232	1.17492	4425.64	4860.45	362.627	4179.59	2073.49	5083.44	ENST00000449219.1	1	+	224183658	224197405	13747	4	ENSG00000185495.6	Intergenic	ENSEMBL
p1409	9.6227e-11	1.02452e-06	1	4.39025	4.39025	4.39025	4.39025	4.39025	4.39025	ENST00000420350.1	1	+	224407314	224415745	8431	3	ENSG00000237101.1	Antisense	ENSEMBL
p141	1.40004e-06	0.607234	1	4.39025	4.39025	4.39025	4.39025	4.39025	4.39025	ENST00000373604.4	1	-	32670369	32671786	1417	2	ENSG00000224066.1	Antisense	ENSEMBL
p1413	8.79001e-05	0.224742	0.994157	95.3459	80.0119	41.1569	30.9005	82.0092	102.34	ENST00000440540.1	1	+	226335703	226342772	7069	2	ENSG00000234478.1	Antisense	ENSEMBL
p1414	4.92813e-06	0.00656853	1	4.39025	4.39025	4.39025	4.39025	4.39025	4.39025	ENST00000453525.1	1	+	226856597	226864046	7449	2	ENSG00000228548.1	Intronic	ENSEMBL
p1417	1.01389e-10	0.541784	1	4.39025	4.39025	4.39025	4.39025	4.39025	4.39025	ENST00000445817.1	1	+	227581291	227618736	37445	4	ENSG00000234277.2	Intergenic	ENSEMBL
p142	0.000127479	9.2284e-09	1.26296	223.475	56.9577	213.372	240.113	64.8241	318.719	ENST00000421616.1	1	-	32671098	32672415	1317	4	ENSG00000224066.1	Antisense	ENSEMBL
p1422	0.107338	0.977409	1.46448	64.329	35.7468	13.7969	39.2866	93.4787	33.9989	ENST00000417605.1	1	+	229644247	229650019	5772	3	ENSG00000223635.1	Divergent	ENSEMBL
p1426	1.05728e-06	0.0466853	1.7437	771.537	873.579	610.206	456.036	714.74	2761.82	ENST00000456782.1	1	+	232061579	232080979	19400	4	ENSG00000226758.1	Intronic	ENSEMBL
p143	3.50045e-11	4.41454e-08	1.97041	170.766	2.67822	158.829	171.223	170.852	312.639	ENST00000448134.1	1	-	32814794	32816264	1470	2	ENSG00000233775.1	Intergenic	ENSEMBL
p1432	9.63953e-11	7.27187e-07	1	4.39025	4.39025	4.39025	4.39025	4.39025	4.39025	ENST00000436039.1	1	+	234742753	234745229	2476	2	ENSG00000228830.1	Antisense	ENSEMBL
p1446	3.49167e-09	3.98201e-16	0.84663	76.4142	96.7074	82.1922	47.2575	36.2696	132.629	ENST00000444330.1	1	+	241587591	241596628	9037	3	ENSG00000225554.1	Intergenic	ENSEMBL
p1447	1.89166e-07	0.96117	1	4.39025	4.39025	4.39025	4.39025	4.39025	4.39025	ENST00000413994.1	1	+	241587697	241596792	9095	2	ENSG00000225554.1	Intergenic	ENSEMBL
p145	0.450069	2.87051e-14	1	4.39025	4.39025	4.39025	4.39025	4.39025	4.39025	ENST00000542839.1	1	-	35227026	35253698	26672	2	ENSG00000255811.1	Antisense	ENSEMBL
p1455	1.47649e-13	1.08102e-08	1.53682	1174.98	1358.06	172.745	995.679	1037.62	2124.98	ENST00000417786.1	1	+	246769174	246771404	2230	2	ENSG00000225300.1	Intronic	ENSEMBL
p1460	0.00024411	1.63137e-16	1	4.39025	4.39025	4.39025	4.39025	4.39025	4.39025	ENST00000582218.1	1	+	247803350	247827145	23795	2	ENSG00000235749.2	Intergenic	ENSEMBL
p147	3.07751e-08	0.0298918	1.47078	610.899	268.851	328.425	589.692	91.5487	1095.72	ENST00000311990.4	1	-	35441299	35444307	3008	3	ENSG00000241014.1	Intergenic	ENSEMBL
p149	3.37658e-08	0.000306092	1.82614	212.856	117.316	122.061	281.59	232.524	311.725	ENST00000425881.1	1	-	36035413	36039348	3935	2	ENSG00000239636.1	Antisense	ENSEMBL
p15	9.62669e-11	2.03375e-07	1	4.39025	4.39025	4.39025	4.39025	4.39025	4.39025	ENST00000448605.2	1	-	639064	741274	102210	3	ENSG00000230021.2	Intergenic	ENSEMBL
p150	0.00177405	0.0324416	1	4.39025	4.39025	4.39025	4.39025	4.39025	4.39025	ENST00000444348.1	1	-	36035415	36043330	7915	3	ENSG00000239636.1	Antisense	ENSEMBL
p152	0.997607	0.291974	1	4.39025	4.39025	4.39025	4.39025	4.39025	4.39025	ENST00000433474.1	1	-	38265391	38266551	1160	2	ENSG00000233728.1	Antisense	ENSEMBL
p154	1.04354e-08	5.61684e-14	1	4.39025	4.39025	4.39025	4.39025	4.39025	4.39025	ENST00000289890.7	1	-	39715509	39723321	7812	3	ENSG00000226438.1	Antisense	ENSEMBL
p155	6.98073e-05	0.461773	1.05693	339.03	127.969	466.423	191.741	394.386	400.433	ENST00000431553.1	1	-	39987951	40007513	19562	3	ENSG00000182109.3	Antisense	ENSEMBL
p158	6.41419e-06	1.11492e-13	1	4.39025	4.39025	4.39025	4.39025	4.39025	4.39025	ENST00000450713.1	1	-	40958828	40974333	15505	2	ENSG00000238287.1	Antisense	ENSEMBL
p160	7.84978e-11	1.60324e-06	1.40811	685.593	163.817	88.1926	800.742	111.879	407.626	ENST00000437060.1	1	-	40981425	40982846	1421	2	ENSG00000238186.1	Antisense	ENSEMBL
p161	2.72039e-12	0.00855863	1	4.39025	4.39025	4.39025	4.39025	4.39025	4.39025	ENST00000440100.1	1	-	41134760	41153260	18500	5	ENSG00000237899.1	Intergenic	ENSEMBL
p167	1.30165e-06	7.41602e-17	1.01618	164.552	101.348	130.081	186.293	180.703	35.3929	ENST00000424948.1	1	-	43820354	43824329	3975	3	ENSG00000234694.1	Divergent	ENSEMBL
p168	4.26644e-09	3.2066e-07	1	4.39025	4.39025	4.39025	4.39025	4.39025	4.39025	ENST00000396885.2	1	-	43913446	43914315	869	2	ENSG00000229372.1	Antisense	ENSEMBL
p169	3.65735e-09	0.0183405	1	4.39025	4.39025	4.39025	4.39025	4.39025	4.39025	ENST00000434346.1	1	-	44167767	44170140	2373	3	ENSG00000236200.1	Antisense	ENSEMBL
p171	3.27038e-07	0.4973	1	4.39025	4.39025	4.39025	4.39025	4.39025	4.39025	ENST00000418149.1	1	-	44169984	44173001	3017	2	ENSG00000236200.1	Antisense	ENSEMBL
p173	4.1495e-07	4.16215e-06	0.919899	104.46	69.7347	189.515	114.271	110.781	109.525	ENST00000446167.1	1	-	44410041	44411974	1933	2	ENSG00000237950.1	Divergent	ENSEMBL
p17334	2.5136e-06	0.743271	1.80928	637.628	467.772	276.335	790.233	361.218	1348.5	TCONS_00001367	1	-	757785	759075	1290	2	XLOC_000667	Intergenic	HumanLincRNACatalog
p17335	1.47943e-10	0.0685274	1	4.39025	4.39025	4.39025	4.39025	4.39025	4.39025	TCONS_00001368	1	-	843464	845308	1844	2	XLOC_000669	Intergenic	HumanLincRNACatalog
p17337	0.0287497	1.27475e-14	1	4.39025	4.39025	4.39025	4.39025	4.39025	4.39025	TCONS_00000073	1	-	852952	854817	1865	4	XLOC_000670	Intergenic	HumanLincRNACatalog
p17339	0.0348694	0.128968	1	4.39025	4.39025	4.39025	4.39025	4.39025	4.39025	TCONS_00000455	1	-	2143961	2152175	8214	2	XLOC_000677	Antisense	HumanLincRNACatalog
p17346	9.84548e-11	0.00723729	1	4.39025	4.39025	4.39025	4.39025	4.39025	4.39025	TCONS_00000077	1	-	5621768	5728315	106547	3	XLOC_000688	Intergenic	HumanLincRNACatalog
p17347	2.40043e-06	1.25517e-06	1.06003	63.2736	75.7021	27.292	41.6746	90.0291	44.5447	TCONS_00001384	1	-	8062788	8067529	4741	2	XLOC_000695	Intergenic	HumanLincRNACatalog
p17354	1.0024e-10	0.518923	1	4.39025	4.39025	4.39025	4.39025	4.39025	4.39025	TCONS_00000470	1	-	13983805	13987033	3228	2	XLOC_000707	Intergenic	HumanLincRNACatalog
p17358	0.00166361	0.254734	1	4.39025	4.39025	4.39025	4.39025	4.39025	4.39025	TCONS_00001406	1	-	16123396	16126839	3443	2	XLOC_000721	Intergenic	HumanLincRNACatalog
p17360	4.09388e-09	4.07713e-12	1	4.39025	4.39025	4.39025	4.39025	4.39025	4.39025	TCONS_00001409	1	-	18335985	18337010	1025	2	XLOC_000724	Intergenic	HumanLincRNACatalog
p17361	3.43206e-06	2.52784e-16	1	4.39025	4.39025	4.39025	4.39025	4.39025	4.39025	TCONS_00000078	1	-	20687597	20732187	44590	4	XLOC_000730	Intergenic	HumanLincRNACatalog
p17362	9.62776e-11	1.75997e-05	1.38323	298.778	380.542	153.826	221.432	413.72	517.279	TCONS_00002304	1	-	20699433	20704252	4819	2	XLOC_000730	Intergenic	HumanLincRNACatalog
p17368	4.32968e-05	0.367809	1.55373	125.466	30.7765	45.7539	122.968	78.3863	112.494	TCONS_00001417	1	-	23877740	23878134	394	2	XLOC_000736	Intergenic	HumanLincRNACatalog
p17369	6.17739e-05	3.74802e-09	0.70064	78.2997	48.1822	90.9547	57.6681	36.2922	58.3846	TCONS_00001418	1	-	23878412	23881254	2842	2	XLOC_000737	Intergenic	HumanLincRNACatalog
p17370	2.94643e-08	6.50691e-09	1	4.39025	4.39025	4.39025	4.39025	4.39025	4.39025	TCONS_00000483	1	-	23940282	23945957	5675	2	XLOC_000738	Intergenic	HumanLincRNACatalog
p17372	0.407475	0.000176701	0.527518	8436.88	3294.61	4667.62	81.6013	1672.32	6896.91	TCONS_00000487	1	-	24863137	24865371	2234	2	XLOC_000744	Antisense	HumanLincRNACatalog
p17373	1.18793e-07	2.22383e-05	1	4.39025	4.39025	4.39025	4.39025	4.39025	4.39025	TCONS_00000490	1	-	25579797	25594376	14579	2	XLOC_000746	Intergenic	HumanLincRNACatalog
p17383	2.35599e-09	2.16616e-08	1	4.39025	4.39025	4.39025	4.39025	4.39025	4.39025	TCONS_00001450	1	-	33603693	33606476	2783	2	XLOC_000780	Intergenic	HumanLincRNACatalog
p17384	1.59899e-06	3.0166e-05	0.545765	117.305	197.103	104.718	65.7592	20.3774	142.608	TCONS_00001451	1	-	35081179	35083207	2028	2	XLOC_000781	Intergenic	HumanLincRNACatalog
p17392	1.15482e-05	1.31463e-07	1	4.39025	4.39025	4.39025	4.39025	4.39025	4.39025	TCONS_00001482	1	-	45762365	45771260	8895	2	XLOC_000816	Intergenic	HumanLincRNACatalog
p17393	0.00177325	7.32704e-07	1	4.39025	4.39025	4.39025	4.39025	4.39025	4.39025	TCONS_00000513	1	-	45769862	45771290	1428	2	XLOC_000816	Intergenic	HumanLincRNACatalog
p17397	0.0712405	0.000836219	1	4.39025	4.39025	4.39025	4.39025	4.39025	4.39025	TCONS_00001485	1	-	47873216	47874257	1041	2	XLOC_000822	Intergenic	HumanLincRNACatalog
p17398	2.57586e-07	2.0849e-12	1	4.39025	4.39025	4.39025	4.39025	4.39025	4.39025	TCONS_00001488	1	-	47971931	47973315	1384	2	XLOC_000824	Intergenic	HumanLincRNACatalog
p17402	2.45723e-05	0.0532317	1	4.39025	4.39025	4.39025	4.39025	4.39025	4.39025	TCONS_00001491	1	-	50731520	50745851	14331	2	XLOC_000831	Intergenic	HumanLincRNACatalog
p17403	2.44028e-07	2.22271e-12	1	4.39025	4.39025	4.39025	4.39025	4.39025	4.39025	TCONS_00001492	1	-	50782664	50786783	4119	3	XLOC_000832	Intergenic	HumanLincRNACatalog
p17406	2.55398e-08	3.15522e-05	1	4.39025	4.39025	4.39025	4.39025	4.39025	4.39025	TCONS_00001494	1	-	51442716	51443912	1196	2	XLOC_000833	Intergenic	HumanLincRNACatalog
p17413	0.0881513	0.493149	1.10947	125.016	43.5438	114.967	62.9637	113.477	138.123	TCONS_00001505	1	-	57109276	57110681	1405	2	XLOC_000846	Divergent	HumanLincRNACatalog
p17415	1.08401e-07	0.0222007	1.73492	110.951	76.6481	2.30219	34.6486	179.109	115.705	TCONS_00001508	1	-	59760716	59762053	1337	2	XLOC_000852	Divergent	HumanLincRNACatalog
p17417	4.19422e-07	4.33439e-12	1.7832	108.995	2.53364	60.6867	150.684	40.2123	116.198	TCONS_00001510	1	-	60429955	60433906	3951	2	XLOC_000854	Intergenic	HumanLincRNACatalog
p17432	0.000476655	9.06788e-16	1	4.39025	4.39025	4.39025	4.39025	4.39025	4.39025	TCONS_00001552	1	-	85063634	85086673	23039	3	XLOC_000895	Intergenic	HumanLincRNACatalog
p17450	1.63283e-07	5.81399e-06	1.6191	1354.07	571.545	290.721	276.795	1355.09	1956.59	TCONS_00001578	1	-	90978719	90998992	20273	2	XLOC_000914	Intergenic	HumanLincRNACatalog
p17455	0.000826887	3.39278e-12	1	4.39025	4.39025	4.39025	4.39025	4.39025	4.39025	TCONS_00001587	1	-	93792164	93806036	13872	5	XLOC_000918	Intergenic	HumanLincRNACatalog
p17460	0.000543586	0.0740962	0.75827	62.5633	90.0893	89.2926	80.1286	65.7035	37.6276	TCONS_00001601	1	-	95781383	95783970	2587	3	XLOC_000927	Intergenic	HumanLincRNACatalog
p17465	0.0209817	3.44264e-06	1	4.39025	4.39025	4.39025	4.39025	4.39025	4.39025	TCONS_00001608	1	-	100728862	100731675	2813	3	XLOC_000939	Divergent	HumanLincRNACatalog
p17468	2.26716e-06	0.00305514	1	4.39025	4.39025	4.39025	4.39025	4.39025	4.39025	TCONS_00001611	1	-	102775824	102830793	54969	2	XLOC_000943	Intergenic	HumanLincRNACatalog
p17476	1.15256e-10	3.11097e-09	0.562125	195.535	275.771	194.175	86.5607	8.39364	279.129	TCONS_00001623	1	-	109621257	109627542	6285	3	XLOC_000951	Intergenic	HumanLincRNACatalog
p17486	1.59788e-10	4.0314e-06	1	4.39025	4.39025	4.39025	4.39025	4.39025	4.39025	TCONS_00001648	1	-	120615907	120619716	3809	2	XLOC_000986	Intergenic	HumanLincRNACatalog
p17487	0.00782963	8.11997e-07	1	4.39025	4.39025	4.39025	4.39025	4.39025	4.39025	TCONS_00001662	1	-	146644429	146645134	705	2	XLOC_001002	Divergent	HumanLincRNACatalog
p17490	5.70178e-07	1.38535e-14	1.14907	20864.9	95565.1	22614.4	97266.6	44088.1	18417.7	TCONS_00002468	1	-	148933290	148951501	18211	2	XLOC_001009	Intergenic	HumanLincRNACatalog
p17495	6.47878e-05	0.962936	1	4.39025	4.39025	4.39025	4.39025	4.39025	4.39025	TCONS_00002485	1	-	154442112	154445591	3479	2	XLOC_001035	Divergent	HumanLincRNACatalog
p175	3.10121e-07	0.0135016	1	4.39025	4.39025	4.39025	4.39025	4.39025	4.39025	ENST00000412378.1	1	-	44410045	44412223	2178	2	ENSG00000237950.1	Divergent	ENSEMBL
p17517	0.0614779	0.00459349	1	4.39025	4.39025	4.39025	4.39025	4.39025	4.39025	TCONS_00001741	1	-	182667343	182667678	335	2	XLOC_001117	Intergenic	HumanLincRNACatalog
p17518	2.68383e-08	1.23128e-07	1	4.39025	4.39025	4.39025	4.39025	4.39025	4.39025	TCONS_00001745	1	-	183118843	183119157	314	2	XLOC_001120	Intergenic	HumanLincRNACatalog
p17535	1.50826e-10	2.11648e-09	1	4.39025	4.39025	4.39025	4.39025	4.39025	4.39025	TCONS_00001775	1	-	203395869	203398365	2496	2	XLOC_001160	Intergenic	HumanLincRNACatalog
p17536	3.41147e-10	1.98652e-08	1	4.39025	4.39025	4.39025	4.39025	4.39025	4.39025	TCONS_00001776	1	-	203507262	203525190	17928	2	XLOC_001162	Intergenic	HumanLincRNACatalog
p17540	4.08974e-06	0.000133913	1	4.39025	4.39025	4.39025	4.39025	4.39025	4.39025	TCONS_00001789	1	-	207574927	207589566	14639	3	XLOC_001178	Intergenic	HumanLincRNACatalog
p17541	1.83073e-09	0.450766	2.2683	708.245	813.524	97.6283	930.28	696.442	2046.55	TCONS_00002573	1	-	207978670	207980881	2211	2	XLOC_001181	Intergenic	HumanLincRNACatalog
p17542	0.00237325	0.0858224	1.01971	59.4256	62.9946	13.2604	46.0637	63.0631	29.2281	TCONS_00001791	1	-	208442558	208443453	895	2	XLOC_001183	Intergenic	HumanLincRNACatalog
p17551	0.0018889	9.30101e-05	0.762401	134.946	86.1647	195.734	138.497	34.6423	144.663	TCONS_00001810	1	-	212802452	212811835	9383	4	XLOC_001195	Intergenic	HumanLincRNACatalog
p17554	1.31041e-07	0.564241	1	4.39025	4.39025	4.39025	4.39025	4.39025	4.39025	TCONS_00002581	1	-	212808799	212811197	2398	2	XLOC_001195	Intergenic	HumanLincRNACatalog
p17557	6.98354e-06	1.98117e-05	1	4.39025	4.39025	4.39025	4.39025	4.39025	4.39025	TCONS_00001814	1	-	213107181	213108781	1600	3	XLOC_001198	Intergenic	HumanLincRNACatalog
p17569	5.01285e-05	8.92113e-07	1.59244	770.213	39.6998	837.516	19.0484	671.65	1932.74	TCONS_00001838	1	-	224151307	224159470	8163	2	XLOC_001223	Intergenic	HumanLincRNACatalog
p17571	9.62227e-11	0.0177865	1	4.39025	4.39025	4.39025	4.39025	4.39025	4.39025	TCONS_00001840	1	-	224623156	224624723	1567	2	XLOC_001227	Intergenic	HumanLincRNACatalog
p17576	0.0107779	0.714316	1	4.39025	4.39025	4.39025	4.39025	4.39025	4.39025	TCONS_00001854	1	-	229027197	229033564	6367	2	XLOC_001242	Intergenic	HumanLincRNACatalog
p17578	0.000531286	1.57014e-06	1.13431	103.947	57.3615	102.632	148.412	33.3988	117.58	TCONS_00001864	1	-	230774213	230776446	2233	2	XLOC_001249	Intergenic	HumanLincRNACatalog
p17580	2.11906e-08	0.00774337	1.60699	170.063	11.3967	137.283	21.8574	48.3273	442.031	TCONS_00001869	1	-	231658906	231664321	5415	3	XLOC_001257	Divergent	HumanLincRNACatalog
p17585	9.66837e-11	1.00419e-10	1	4.39025	4.39025	4.39025	4.39025	4.39025	4.39025	TCONS_00002622	1	-	234852451	234855189	2738	2	XLOC_001264	Intergenic	HumanLincRNACatalog
p17589	0.161703	0.00259361	1	4.39025	4.39025	4.39025	4.39025	4.39025	4.39025	TCONS_00001887	1	-	235108773	235116431	7658	2	XLOC_001266	Intergenic	HumanLincRNACatalog
p17590	0.105611	1.97068e-06	1	4.39025	4.39025	4.39025	4.39025	4.39025	4.39025	TCONS_00001888	1	-	235115912	235116505	593	2	XLOC_001266	Intergenic	HumanLincRNACatalog
p17592	0.0792535	9.84495e-08	1	4.39025	4.39025	4.39025	4.39025	4.39025	4.39025	TCONS_00001895	1	-	242692665	242693831	1166	2	XLOC_001280	Intergenic	HumanLincRNACatalog
p17595	1.37134e-10	1.78052e-05	1	4.39025	4.39025	4.39025	4.39025	4.39025	4.39025	TCONS_00001898	1	-	244210525	244212010	1485	2	XLOC_001286	Divergent	HumanLincRNACatalog
p17596	0.00461787	7.10854e-09	1	4.39025	4.39025	4.39025	4.39025	4.39025	4.39025	TCONS_00001899	1	-	244393072	244401962	8890	2	XLOC_001288	Intergenic	HumanLincRNACatalog
p17599	7.38168e-11	0.000487106	1	4.39025	4.39025	4.39025	4.39025	4.39025	4.39025	TCONS_00000124	1	+	529832	530595	763	2	XLOC_000004	Intergenic	HumanLincRNACatalog
p176	9.62325e-11	0.949855	0.753528	60.8721	83.3504	84.6864	18.6361	46.9999	106.853	ENST00000414156.1	1	-	44709079	44709945	866	2	ENSG00000233602.1	Intronic	ENSEMBL
p17601	1.72792e-07	0.000177812	1.80896	763.613	293.148	710.051	705.689	801.304	1689.1	TCONS_00001909	1	+	756055	757301	1246	2	XLOC_000008	Intergenic	HumanLincRNACatalog
p17602	7.88245e-07	4.89721e-05	1	4.39025	4.39025	4.39025	4.39025	4.39025	4.39025	TCONS_00000779	1	+	756410	758975	2565	2	XLOC_000008	Intergenic	HumanLincRNACatalog
p17603	1.7335e-09	0.000595759	2.26188	997.853	250.996	822.001	1100.99	1299.84	2283.19	TCONS_00000796	1	+	840486	841186	700	2	XLOC_000010	Intergenic	HumanLincRNACatalog
p17604	0.00110791	1.88617e-07	0.822501	1368.48	898.631	1269.52	952.409	345.007	1611.46	TCONS_00000799	1	+	1210338	1214764	4426	3	XLOC_000015	Intergenic	HumanLincRNACatalog
p17605	0.000242724	0.00300002	1	4.39025	4.39025	4.39025	4.39025	4.39025	4.39025	TCONS_00000803	1	+	1533412	1536058	2646	2	XLOC_000019	Antisense	HumanLincRNACatalog
p17607	0.105992	2.29438e-14	1	4.39025	4.39025	4.39025	4.39025	4.39025	4.39025	TCONS_00000137	1	+	1535818	1545864	10046	4	XLOC_000019	Divergent	HumanLincRNACatalog
p17610	0.112055	1.81163e-07	1.5268	1173.14	124.07	812.566	457.743	1415.94	1347.52	TCONS_00001917	1	+	2482705	2483281	576	2	XLOC_000022	Intergenic	HumanLincRNACatalog
p17611	1.80047e-06	4.90579e-16	1	4.39025	4.39025	4.39025	4.39025	4.39025	4.39025	TCONS_00001923	1	+	2693738	2695364	1626	2	XLOC_000026	Intronic	HumanLincRNACatalog
p17616	0.0256985	0.0398083	1.42366	76.3161	50.4984	47.1194	92.3676	99.2774	55.9785	TCONS_00000825	1	+	4472567	4484721	12154	5	XLOC_000033	Intergenic	HumanLincRNACatalog
p17617	0.000621673	7.87383e-18	0.741628	738.892	885.429	353.761	262.829	109.847	1094.32	TCONS_00001927	1	+	4482999	4484708	1709	2	XLOC_000033	Intergenic	HumanLincRNACatalog
p17624	8.58751e-05	0.00425374	1.38501	170.094	64.6898	47.1587	0.924076	163.372	226.196	TCONS_00000838	1	+	11418036	11424587	6551	4	XLOC_000051	Intergenic	HumanLincRNACatalog
p17627	1.23508e-05	1.27136e-09	0.628103	76.2169	52.1849	28.928	32.9569	4.49217	61.3703	TCONS_00000841	1	+	13997964	14001403	3439	2	XLOC_000056	Intergenic	HumanLincRNACatalog
p17633	0.399128	1.72585e-09	1.18678	206.898	92.5119	98.4992	14.4545	256.322	201.454	TCONS_00000855	1	+	19658089	19660931	2842	2	XLOC_000076	Intergenic	HumanLincRNACatalog
p17639	6.23908e-06	4.63587e-09	1	4.39025	4.39025	4.39025	4.39025	4.39025	4.39025	TCONS_00001961	1	+	25367663	25373839	6176	3	XLOC_000099	Intergenic	HumanLincRNACatalog
p17647	0.475494	0.0134853	1	4.39025	4.39025	4.39025	4.39025	4.39025	4.39025	TCONS_00000877	1	+	30184548	30185414	866	2	XLOC_000115	Intergenic	HumanLincRNACatalog
p17660	2.28216e-07	0.000971231	1	4.39025	4.39025	4.39025	4.39025	4.39025	4.39025	TCONS_00001989	1	+	39508263	39509883	1620	2	XLOC_000152	Intergenic	HumanLincRNACatalog
p17664	1.12609e-06	2.22852e-08	1.49825	64.3133	15.6099	36.6213	72.7018	67.9951	33.9163	TCONS_00000921	1	+	43610069	43610856	787	2	XLOC_000162	Intergenic	HumanLincRNACatalog
p17666	1.56607e-05	0.362789	1	4.39025	4.39025	4.39025	4.39025	4.39025	4.39025	TCONS_00002017	1	+	45672403	45683543	11140	2	XLOC_000167	Divergent	HumanLincRNACatalog
p17670	0.0218184	2.477e-06	1	4.39025	4.39025	4.39025	4.39025	4.39025	4.39025	TCONS_00000930	1	+	47645093	47645573	480	2	XLOC_000175	Intergenic	HumanLincRNACatalog
p17680	0.00278357	9.52731e-06	1	4.39025	4.39025	4.39025	4.39025	4.39025	4.39025	TCONS_00002032	1	+	53905447	53905770	323	2	XLOC_000198	Intergenic	HumanLincRNACatalog
p17683	5.2966e-10	4.09786e-10	1	4.39025	4.39025	4.39025	4.39025	4.39025	4.39025	TCONS_00000949	1	+	55461469	55462838	1369	2	XLOC_000205	Intergenic	HumanLincRNACatalog
p17688	1.17992e-05	4.85565e-12	1.21209	617.223	151.558	764.785	545.09	304.279	1009.45	TCONS_00000953	1	+	56441022	56483498	42476	2	XLOC_000211	Intergenic	HumanLincRNACatalog
p17697	0.999991	1.27624e-10	1.92999	287.653	46.5249	161.141	277.214	389.707	289.04	TCONS_00000965	1	+	60612851	60614325	1474	2	XLOC_000224	Intergenic	HumanLincRNACatalog
p17700	5.78156e-05	2.84612e-14	0.81711	84.9203	94.7544	6.70044	4.59114	49.2726	98.4254	TCONS_00000968	1	+	62102823	62113990	11167	2	XLOC_000227	Intergenic	HumanLincRNACatalog
p17707	0.000208554	9.13356e-09	1	4.39025	4.39025	4.39025	4.39025	4.39025	4.39025	TCONS_00000984	1	+	73315919	73320112	4193	2	XLOC_000255	Intergenic	HumanLincRNACatalog
p17712	2.19394e-09	8.91118e-10	1.23627	84.5639	45.0494	68.9571	79.0258	49.3803	117.081	TCONS_00000998	1	+	77686608	77686969	361	2	XLOC_000263	Intergenic	HumanLincRNACatalog
p17713	9.99705e-11	0.0116737	1	4.39025	4.39025	4.39025	4.39025	4.39025	4.39025	TCONS_00002073	1	+	78689325	78717247	27922	3	XLOC_000264	Intergenic	HumanLincRNACatalog
p17715	7.22998e-09	0.00155946	1.61681	62.2297	16.2413	33.986	33.0023	95.5665	53.253	TCONS_00001000	1	+	78690957	78716742	25785	2	XLOC_000264	Intergenic	HumanLincRNACatalog
p17721	0.162527	3.64264e-05	1.88654	103.799	13.302	108.312	170.188	141.804	113.257	TCONS_00002080	1	+	81001444	81109980	108536	2	XLOC_000268	Intergenic	HumanLincRNACatalog
p17731	0.200021	7.66885e-13	1.15551	77.2519	74.1154	79.8152	83.4498	92.5385	91.146	TCONS_00001018	1	+	89510012	89512879	2867	2	XLOC_000283	Intergenic	HumanLincRNACatalog
p17732	1.20853e-06	8.30576e-05	1.74211	619.706	358.076	299.53	351.493	944.573	929.149	TCONS_00001023	1	+	90224275	90227625	3350	2	XLOC_000290	Intergenic	HumanLincRNACatalog
p17733	1.69272e-09	7.56902e-06	1	4.39025	4.39025	4.39025	4.39025	4.39025	4.39025	TCONS_00001024	1	+	90251626	90253148	1522	2	XLOC_000291	Intergenic	HumanLincRNACatalog
p17740	0.000818432	4.99203e-06	0.94902	87.6361	50.6516	74.176	94.5875	28.8421	78.2026	TCONS_00001036	1	+	94798874	94808287	9413	3	XLOC_000301	Intergenic	HumanLincRNACatalog
p17763	6.21957e-06	0.0102626	1	4.39025	4.39025	4.39025	4.39025	4.39025	4.39025	TCONS_00001086	1	+	106993297	106995113	1816	3	XLOC_000329	Intergenic	HumanLincRNACatalog
p17768	3.00177e-07	2.06252e-06	1	4.39025	4.39025	4.39025	4.39025	4.39025	4.39025	TCONS_00000272	1	+	110825155	110825722	567	2	XLOC_000341	Intergenic	HumanLincRNACatalog
p17773	4.11333e-08	2.22899e-12	1.02416	103.789	107.459	113.659	119.665	61.9181	151.174	TCONS_00002142	1	+	117647168	117647504	336	2	XLOC_000363	Intergenic	HumanLincRNACatalog
p17776	0.730179	7.9318e-14	1.30982	6976.98	2927.85	500.931	2497.7	1442.01	9690.01	TCONS_00001130	1	+	120388520	120389383	863	2	XLOC_000371	Intergenic	HumanLincRNACatalog
p17782	0.903653	0.00400961	1	4.39025	4.39025	4.39025	4.39025	4.39025	4.39025	TCONS_00001136	1	+	142618921	142625251	6330	3	XLOC_000377	Intergenic	HumanLincRNACatalog
p17783	0.187437	0.401615	0.580601	285.244	205.441	332.543	194.973	34.7475	248.247	TCONS_00001137	1	+	143231331	143232085	754	2	XLOC_000380	Intergenic	HumanLincRNACatalog
p17788	1.1702e-07	8.31543e-11	1	4.39025	4.39025	4.39025	4.39025	4.39025	4.39025	TCONS_00001141	1	+	148556479	148558168	1689	2	XLOC_000390	Divergent	HumanLincRNACatalog
p17789	1.06921e-09	0.00308283	2.20831	219.425	28.1098	42.2862	157.865	184.602	297.546	TCONS_00000301	1	+	149186302	149187373	1071	2	XLOC_000392	Intergenic	HumanLincRNACatalog
p17790	1.72547e-05	0.0520264	1	4.39025	4.39025	4.39025	4.39025	4.39025	4.39025	TCONS_00000305	1	+	149591178	149592306	1128	2	XLOC_000397	Intergenic	HumanLincRNACatalog
p17793	0.00887656	2.40224e-08	1	4.39025	4.39025	4.39025	4.39025	4.39025	4.39025	TCONS_00002162	1	+	150505132	150509639	4507	2	XLOC_000403	Intergenic	HumanLincRNACatalog
p17797	2.91191e-05	1.41038e-05	1.78393	106.934	118.514	24.9162	99.082	142.15	205.401	TCONS_00001179	1	+	161265663	161266179	516	2	XLOC_000440	Intergenic	HumanLincRNACatalog
p178	0.000312744	0.414902	1	4.39025	4.39025	4.39025	4.39025	4.39025	4.39025	ENST00000428791.1	1	-	45224795	45241482	16687	3	ENSG00000225721.1	Antisense	ENSEMBL
p17802	3.18325e-14	0.0203914	0.541234	57.6512	63.5118	85.1315	10.189	38.077	63.3875	TCONS_00001190	1	+	168756186	168758111	1925	2	XLOC_000455	Intergenic	HumanLincRNACatalog
p17806	1.36517e-07	0.0893333	1	4.39025	4.39025	4.39025	4.39025	4.39025	4.39025	TCONS_00001208	1	+	178621016	178631642	10626	2	XLOC_000474	Intergenic	HumanLincRNACatalog
p17808	0.0207257	0.0517302	0.607576	60.7632	87.0848	84.9614	7.54728	92.0409	41.8612	TCONS_00001210	1	+	180100863	180103986	3123	2	XLOC_000476	Intergenic	HumanLincRNACatalog
p17810	6.52219e-06	7.18003e-06	1	4.39025	4.39025	4.39025	4.39025	4.39025	4.39025	TCONS_00001212	1	+	180864245	180869874	5629	2	XLOC_000478	Intergenic	HumanLincRNACatalog
p17811	0.024953	1.89292e-13	1	4.39025	4.39025	4.39025	4.39025	4.39025	4.39025	TCONS_00001215	1	+	181904061	181906113	2052	2	XLOC_000482	Intergenic	HumanLincRNACatalog
p17813	0.000670845	5.27598e-08	1	4.39025	4.39025	4.39025	4.39025	4.39025	4.39025	TCONS_00001218	1	+	184090199	184091540	1341	2	XLOC_000490	Intergenic	HumanLincRNACatalog
p17814	1.65694e-10	2.18787e-12	1.50189	135.937	100.883	40.0034	60.8362	120.292	234.631	TCONS_00001219	1	+	184632074	184634810	2736	2	XLOC_000492	Intergenic	HumanLincRNACatalog
p17815	2.63834e-05	0.00351063	2.21695	165.249	198.413	32.4058	130.359	174.221	573.483	TCONS_00001220	1	+	184746599	184748797	2198	2	XLOC_000493	Intergenic	HumanLincRNACatalog
p17817	7.82653e-12	0.0119585	1	4.39025	4.39025	4.39025	4.39025	4.39025	4.39025	TCONS_00002202	1	+	185532299	185590112	57813	2	XLOC_000495	Intergenic	HumanLincRNACatalog
p17818	7.77975e-12	6.50022e-14	1.29594	1013.23	1168.09	628.786	843.66	834.753	1963.3	TCONS_00001225	1	+	189118916	189119860	944	2	XLOC_000502	Intergenic	HumanLincRNACatalog
p17821	0.0115237	6.44222e-05	1.9536	1285.75	103.542	335.179	1177.55	578.817	1612.56	TCONS_00001228	1	+	190447610	190463251	15641	3	XLOC_000505	Divergent	HumanLincRNACatalog
p17823	0.125859	2.54013e-05	1.25095	6616.58	3573.75	2.96096	1203.65	2807.78	8739.85	TCONS_00001232	1	+	195450555	195469368	18813	2	XLOC_000511	Intergenic	HumanLincRNACatalog
p17824	1.35463e-06	9.48222e-08	1	4.39025	4.39025	4.39025	4.39025	4.39025	4.39025	TCONS_00001233	1	+	200380828	200384659	3831	2	XLOC_000515	Intergenic	HumanLincRNACatalog
p17831	0.640099	0.000104652	0.897988	60.3009	23.4885	70.3665	45.5417	59.6604	33.2281	TCONS_00001252	1	+	207558528	207560344	1816	2	XLOC_000540	Intergenic	HumanLincRNACatalog
p17832	0.0471068	0.00265075	1	4.39025	4.39025	4.39025	4.39025	4.39025	4.39025	TCONS_00001253	1	+	207589902	207597521	7619	2	XLOC_000541	Intergenic	HumanLincRNACatalog
p17842	0.00356698	0.00867701	0.800415	58.4206	92.0522	73.3663	44.3535	85.6524	49.1584	TCONS_00001268	1	+	212733388	212734736	1348	2	XLOC_000555	Intergenic	HumanLincRNACatalog
p17846	0.10259	1.5402e-05	1.37121	92.6313	39.3105	145.125	197.851	141.78	40.2878	TCONS_00001277	1	+	219092222	219098202	5980	3	XLOC_000565	Intergenic	HumanLincRNACatalog
p17848	0.000154576	0.194364	1	4.39025	4.39025	4.39025	4.39025	4.39025	4.39025	TCONS_00001278	1	+	219391857	219467786	75929	2	XLOC_000566	Intergenic	HumanLincRNACatalog
p17851	0.00171393	3.39082e-12	1.08774	135.362	179.266	1.97491	46.1143	135.449	162.818	TCONS_00001281	1	+	219616119	219618818	2699	2	XLOC_000567	Intergenic	HumanLincRNACatalog
p17862	8.84154e-07	7.64192e-07	1	4.39025	4.39025	4.39025	4.39025	4.39025	4.39025	TCONS_00001323	1	+	230450245	230451789	1544	2	XLOC_000605	Intergenic	HumanLincRNACatalog
p17869	0.354443	1.68115e-09	1	4.39025	4.39025	4.39025	4.39025	4.39025	4.39025	TCONS_00002259	1	+	232979122	233001203	22081	3	XLOC_000618	Intergenic	HumanLincRNACatalog
p17870	2.73501e-06	0.0320901	1	4.39025	4.39025	4.39025	4.39025	4.39025	4.39025	TCONS_00001329	1	+	232979122	233033391	54269	4	XLOC_000618	Intergenic	HumanLincRNACatalog
p17876	1.18165e-06	3.31077e-13	1.67503	164.893	156.306	34.1066	175.548	170.881	248.716	TCONS_00002269	1	+	237070343	237080231	9888	3	XLOC_000633	Intergenic	HumanLincRNACatalog
p17877	0.000632203	9.70098e-14	1	4.39025	4.39025	4.39025	4.39025	4.39025	4.39025	TCONS_00001340	1	+	238588740	238608261	19521	2	XLOC_000635	Intergenic	HumanLincRNACatalog
p17885	6.81372e-06	1.27094e-05	1	4.39025	4.39025	4.39025	4.39025	4.39025	4.39025	TCONS_00001355	1	+	246952826	246955790	2964	3	XLOC_000643	Intergenic	HumanLincRNACatalog
p17887	0.00480347	8.50931e-11	1.37428	1307.63	1098.32	376.498	1260.95	995.971	1566.95	TCONS_00002272	1	+	247496211	247556671	60460	2	XLOC_000647	Intergenic	HumanLincRNACatalog
p17889	4.71933e-09	1.33147e-05	1	4.39025	4.39025	4.39025	4.39025	4.39025	4.39025	TCONS_00001362	1	+	247549930	247556961	7031	2	XLOC_000647	Intergenic	HumanLincRNACatalog
p180	6.34697e-16	1.48579e-14	2.16045	1425	421.304	430.063	833.196	1190.61	2894.16	ENST00000506599.1	1	-	46641157	46642150	993	2	ENSG00000250719.1	Intronic	ENSEMBL
p181	9.70799e-09	4.00244e-05	1	4.39025	4.39025	4.39025	4.39025	4.39025	4.39025	ENST00000416581.1	1	-	46912344	46915376	3032	3	ENSG00000224863.1	Intergenic	ENSEMBL
p185	1.35051e-10	0.129724	1.13758	50.6363	20.5958	69.3369	95.6014	38.7868	25.5198	ENST00000455238.1	1	-	48544458	48547868	3410	2	ENSG00000231413.1	Intergenic	ENSEMBL
p195	0.0401761	0.000286731	1	4.39025	4.39025	4.39025	4.39025	4.39025	4.39025	ENST00000449958.1	1	-	53832339	53833917	1578	2	ENSG00000230138.1	Intergenic	ENSEMBL
p198	0.00376238	1.07496e-09	0.902842	88.969	22.5568	25.4945	39.9242	41.67	42.1135	ENST00000416119.1	1	-	55087149	55094111	6962	2	ENSG00000230728.1	Intronic	ENSEMBL
p199	1.1975e-06	0.00509266	1	4.39025	4.39025	4.39025	4.39025	4.39025	4.39025	ENST00000458389.1	1	-	55314137	55316072	1935	2	ENSG00000244324.1	Antisense	ENSEMBL
p204	5.33225e-10	1.94548e-05	1	4.39025	4.39025	4.39025	4.39025	4.39025	4.39025	ENST00000424592.1	1	-	59304119	59316926	12807	3	ENSG00000231740.1	Intergenic	ENSEMBL
p206	0.761535	5.28166e-05	1	4.39025	4.39025	4.39025	4.39025	4.39025	4.39025	ENST00000427292.1	1	-	59361516	59362375	859	2	ENSG00000232453.1	Intergenic	ENSEMBL
p213	5.08094e-08	0.0581432	1	4.39025	4.39025	4.39025	4.39025	4.39025	4.39025	ENST00000587839.1	1	-	59598378	59612499	14121	2	ENSG00000224609.2	Intergenic	ENSEMBL
p214	0.00087455	1.90521e-17	1	4.39025	4.39025	4.39025	4.39025	4.39025	4.39025	ENST00000443012.1	1	-	60220418	60254854	34436	2	ENSG00000226883.1	Antisense	ENSEMBL
p22	2.49807e-11	1.38037e-12	1.25696	1228.92	1143.84	5.8135	437.996	298.898	2252.88	ENST00000432961.1	1	-	852749	853914	1165	2	ENSG00000223764.1	Intergenic	ENSEMBL
p233	4.33844e-05	2.30695e-06	0.839143	60.2467	24.0462	69.0424	41.6995	60.5903	26.3803	ENST00000435739.1	1	-	65745138	65772204	27066	2	ENSG00000229294.1	Intronic	ENSEMBL
p24746	0.159373	1.00919e-10	0.907889	205.226	188.624	112.001	6.72992	258.687	193.839	NR_026874.1	1	-	852952	854817	1865	4	LOC100130417	Intergenic	RefSeq
p24747	0.0141612	5.87326e-08	1	4.39025	4.39025	4.39025	4.39025	4.39025	4.39025	NR_037844.1	1	-	2487207	2488450	1243	2	LOC100133445	Antisense	RefSeq
p24754	2.69537e-08	7.58358e-07	1	4.39025	4.39025	4.39025	4.39025	4.39025	4.39025	XR_158754.1	1	-	23610848	23612375	1527	2	LOC100996511	Intergenic	RefSeq
p24759	3.35149e-05	9.37646e-07	0.939008	114.37	49.8244	184.757	76.6951	91.8871	159.086	XR_159046.1	1	-	91485752	91487282	1530	2	LOC100996620	Intronic	RefSeq
p24760	4.95156e-05	0.0921527	1	4.39025	4.39025	4.39025	4.39025	4.39025	4.39025	XR_110480.2	1	-	100730236	100731701	1465	3	LOC100506007	Divergent	RefSeq
p24762	7.64901e-11	0.0758838	1.08324	24027.6	38981.6	74320.4	72795.5	61616.4	14349.6	NR_027646.1	1	-	116935486	116961244	25758	3	ATP1A1OS	Antisense	RefSeq
p24765	0.290401	7.95447e-06	1	4.39025	4.39025	4.39025	4.39025	4.39025	4.39025	NR_003005.1	1	-	155895748	155895877	129	1	SCARNA4	Intronic	RefSeq
p24766	1.27719e-07	0.102639	1	4.39025	4.39025	4.39025	4.39025	4.39025	4.39025	NR_028105.1	1	-	160209011	160232318	23307	4	DCAF8	Antisense	RefSeq
p24769	0.000405016	0.0326515	2.05104	1397.3	487.695	135.324	883.742	1130.03	2129.98	NR_038397.1	1	-	172107723	172113975	6252	1	DNM3OS	Intronic	RefSeq
p24771	0.0230729	7.28011e-08	1	4.39025	4.39025	4.39025	4.39025	4.39025	4.39025	XR_108307.2	1	-	172362877	172384514	21637	3	LOC100505991	Antisense	RefSeq
p24772	8.00314e-06	0.000630813	1.26436	108.284	11.7456	85.2776	44.6213	44.224	170.736	NR_037845.1	1	-	173204198	173446294	242096	3	LOC100506023	Divergent	RefSeq
p24773	1.5262e-07	0.00231111	1	4.39025	4.39025	4.39025	4.39025	4.39025	4.39025	NR_002998.1	1	-	175937532	175937676	144	1	SCARNA3	Intronic	RefSeq
p24782	2.98632e-09	0.195824	1	4.39025	4.39025	4.39025	4.39025	4.39025	4.39025	NR_038845.1	1	-	219254314	219347130	92816	5	LOC643723	Divergent	RefSeq
p24789	0.0279597	7.04833e-05	1	4.39025	4.39025	4.39025	4.39025	4.39025	4.39025	NR_047526.1	1	+	762970	778984	16014	3	LOC643837	Intergenic	RefSeq
p24790	1.65451e-05	6.19443e-10	1	4.39025	4.39025	4.39025	4.39025	4.39025	4.39025	NR_040065.1	1	+	4000671	4012643	11972	3	LOC728716	Intergenic	RefSeq
p24792	9.71483e-11	0.000231736	1	4.39025	4.39025	4.39025	4.39025	4.39025	4.39025	XR_108366.1	1	+	17520820	17521393	573	1	LOC400743	Intergenic	RefSeq
p24793	3.85e-05	8.24777e-11	0.816955	111.146	41.283	135.859	74.0984	32.8884	128.532	XR_108368.1	1	+	19725372	19727708	2336	1	LOC644083	Intronic	RefSeq
p24794	0.00794954	0.0269954	1	4.39025	4.39025	4.39025	4.39025	4.39025	4.39025	NR_023918.1	1	+	22351706	22357716	6010	2	LINC00339	Intergenic	RefSeq
p24796	0.189577	0.0016509	1	4.39025	4.39025	4.39025	4.39025	4.39025	4.39025	NR_024270.1	1	+	45769581	45771291	1710	1	LOC400752	Intergenic	RefSeq
p24800	9.0448e-09	1.17504e-07	1	4.39025	4.39025	4.39025	4.39025	4.39025	4.39025	XR_110482.1	1	+	101491433	101546991	55558	5	LOC100506051	Divergent	RefSeq
p24809	0.551008	7.52104e-14	1	4.39025	4.39025	4.39025	4.39025	4.39025	4.39025	NR_024237.1	1	+	151810944	151816641	5697	4	LOC100132111	Antisense	RefSeq
p24810	0.0657853	3.77853e-16	1	4.39025	4.39025	4.39025	4.39025	4.39025	4.39025	XR_108362.1	1	+	157995344	158001611	6267	2	KIRREL-IT1	Intronic	RefSeq
p24811	0.0127951	3.58549e-05	0.793031	2601.99	777.164	1925.78	849.87	534.174	2822.94	NR_047648.1	1	+	161551128	161571010	19882	7	FCGR2C	Antisense	RefSeq
p24813	1.83793e-10	0.00337879	1	4.39025	4.39025	4.39025	4.39025	4.39025	4.39025	XR_158745.1	1	+	168217905	168222263	4358	2	LOC100996595	Intergenic	RefSeq
p24816	6.08497e-06	6.64142e-05	1	4.39025	4.39025	4.39025	4.39025	4.39025	4.39025	XR_108328.3	1	+	201963424	201964692	1268	2	LOC100506636	Intronic	RefSeq
p249	0.000129296	1.70885e-05	1.03662	135.599	2.71396	170.005	97.1995	94.0018	128.407	ENST00000436206.1	1	-	77811730	77815270	3540	2	ENSG00000233099.1	Intronic	ENSEMBL
p251	3.54231e-07	0.491744	1	4.39025	4.39025	4.39025	4.39025	4.39025	4.39025	ENST00000597757.1	1	-	78347043	78353374	6331	2	ENSG00000235927.2	Divergent	ENSEMBL
p25636	1.97848e-08	3.08583e-11	1	4.39025	4.39025	4.39025	4.39025	4.39025	4.39025	uc001bbe.1	1	-	19398603	19402005	3402	1	AX747516	Antisense	UCSC
p25638	1.22522e-05	1.41995e-09	1	4.39025	4.39025	4.39025	4.39025	4.39025	4.39025	uc001ben.1	1	-	21602542	21604868	2326	1	AX747766	Intronic	UCSC
p25642	1.99552e-05	3.86237e-08	1	4.39025	4.39025	4.39025	4.39025	4.39025	4.39025	uc001bxa.1	1	-	33607471	33608831	1360	1	AX747064	Intergenic	UCSC
p25643	4.84239e-06	0.991839	1	4.39025	4.39025	4.39025	4.39025	4.39025	4.39025	uc021oly.1	1	-	40222853	40225715	2862	1	AB075489	Intronic	UCSC
p25646	0.0180878	3.92866e-17	1	4.39025	4.39025	4.39025	4.39025	4.39025	4.39025	uc001ctg.1	1	-	52302636	52305398	2762	1	AK090844	Intronic	UCSC
p25647	1.42168e-10	0.00184758	1	4.39025	4.39025	4.39025	4.39025	4.39025	4.39025	uc001cyw.1	1	-	58933598	58934677	1079	1	AX746780	Intergenic	UCSC
p25660	5.19309e-10	1.11703e-13	1	4.39025	4.39025	4.39025	4.39025	4.39025	4.39025	uc010pmp.1	1	-	173387087	173430501	43414	2	BC136808	Intergenic	UCSC
p25661	7.42005e-09	7.8177e-07	1	4.39025	4.39025	4.39025	4.39025	4.39025	4.39025	uc001gwj.1	1	-	201332423	201333316	893	1	AK055533	Antisense	UCSC
p25670	4.79893e-10	6.1107e-07	1	4.39025	4.39025	4.39025	4.39025	4.39025	4.39025	uc001hto.1	1	-	229589676	229591617	1941	1	AX747652	Intronic	UCSC
p25675	8.42303e-09	0.335732	1	4.39025	4.39025	4.39025	4.39025	4.39025	4.39025	uc001aiu.1	1	+	2112574	2114663	2089	1	AX747530	Intronic	UCSC
p25679	0.362628	0.00277837	1	4.39025	4.39025	4.39025	4.39025	4.39025	4.39025	uc010oaz.1	1	+	11900375	11907674	7299	4	NPPA-AS1	Antisense	UCSC
p25685	6.21228e-13	0.00272968	1	4.39025	4.39025	4.39025	4.39025	4.39025	4.39025	uc001bzm.1	1	+	36391432	36395210	3778	1	AK025726	Intergenic	UCSC
p25686	0.0514667	0.00153971	1	4.39025	4.39025	4.39025	4.39025	4.39025	4.39025	uc001chr.3	1	+	43144356	43147330	2974	2	AF086102	Divergent	UCSC
p25687	4.37855e-05	0.774644	1	4.39025	4.39025	4.39025	4.39025	4.39025	4.39025	uc001cij.1	1	+	43323292	43354460	31168	4	BC043541	Intergenic	UCSC
p25689	0.00280431	4.5325e-09	1	4.39025	4.39025	4.39025	4.39025	4.39025	4.39025	uc001djh.1	1	+	84543635	84546350	2715	1	BC037304	Antisense	UCSC
p25690	5.8654e-07	3.09611e-06	1	4.39025	4.39025	4.39025	4.39025	4.39025	4.39025	uc001dqe.1	1	+	94317792	94319887	2095	1	AX746627	Intergenic	UCSC
p25691	1.99388e-05	2.1054e-11	1	4.39025	4.39025	4.39025	4.39025	4.39025	4.39025	uc001ebn.1	1	+	112256829	112259310	2481	1	AK023457	Divergent	UCSC
p25693	0.475982	0.000149977	0.919962	337.987	265.953	111.978	160.741	180.362	317.515	uc001edc.1	1	+	113499036	113542118	43082	3	BC047723	Divergent	UCSC
p25694	1.30693e-07	0.0125938	1	4.39025	4.39025	4.39025	4.39025	4.39025	4.39025	uc001eho.1	1	+	119683047	119694031	10984	4	BC063600	Antisense	UCSC
p25696	7.80321e-10	0.000163651	1.21978	1103.32	1048.01	2.61622	407.592	1339.6	880.142	uc001emi.4	1	+	145004780	145005287	507	1	BC065231	Intronic	UCSC
p25697	9.76686e-11	1.53665e-05	1	4.39025	4.39025	4.39025	4.39025	4.39025	4.39025	uc021ouz.1	1	+	145500506	145501669	1163	1	AK123675	Intronic	UCSC
p25701	1.08674e-10	0.201885	0.649265	4320.95	2855.66	4692.85	1970.55	2884.23	2851.64	uc001esl.4	1	+	149576452	149616786	40334	3	LOC728855	Intergenic	UCSC
p25703	1.01639e-05	5.00637e-09	0.886781	63.1714	2.04101	63.0604	84.9148	7.65229	21.1828	uc009wpd.1	1	+	155105263	155106131	868	1	AK308965	Intronic	UCSC
p25704	7.68341e-08	1.53734e-06	1	4.39025	4.39025	4.39025	4.39025	4.39025	4.39025	uc001gdo.3	1	+	165738165	165744685	6520	3	BC071770	Divergent	UCSC
p25706	1.23046e-10	0.113233	1.29316	136.193	128.663	86.4241	183.584	64.0594	206.617	uc001gkr.1	1	+	175526123	175533005	6882	2	AK093214	Intronic	UCSC
p25707	1.18665e-06	1.76877e-05	1.59429	50.2974	1.04766	30.7717	15.4675	77.2517	38.1991	uc001gks.3	1	+	175526123	175537388	11265	2	BC043291	Intronic	UCSC
p25710	0.000510007	2.37164e-08	1	4.39025	4.39025	4.39025	4.39025	4.39025	4.39025	uc001gqz.1	1	+	184727265	184730133	2868	1	AX747662	Intergenic	UCSC
p25711	0.00188943	8.74757e-07	1	4.39025	4.39025	4.39025	4.39025	4.39025	4.39025	uc001hbc.3	1	+	204485506	204596131	110625	33	MDM4	Antisense	UCSC
p25712	9.629e-11	3.10136e-06	1	4.39025	4.39025	4.39025	4.39025	4.39025	4.39025	uc001hns.1	1	+	222906202	222908533	2331	1	AK025140	Divergent	UCSC
p263	0.0114133	2.0747e-14	1	4.39025	4.39025	4.39025	4.39025	4.39025	4.39025	ENST00000565575.1	1	-	87169184	87170145	961	1	ENSG00000261737.1	Divergent	ENSEMBL
p26579	6.28646e-06	0.000449291	1.01572	1404.26	1338.97	305.747	1214.01	662.572	1220.33	HIT000087984	1	-	16160974	16161280	306	1	HIX0000162	Intergenic	H-InvDB
p26584	1.79948e-05	2.51842e-06	1	4.39025	4.39025	4.39025	4.39025	4.39025	4.39025	HIT000218957	1	-	100924260	100924592	332	1	HIX0029731	Intronic	H-InvDB
p26589	2.80018e-08	0.309565	0.683896	80.3131	94.4527	94.6118	58.7428	51.8163	73.6673	HIT000395572	1	-	200443216	200443559	343	1	HIX0093898	Intergenic	H-InvDB
p26590	2.00218e-10	0.000182073	1.58302	1177.23	581.115	476.456	1010.38	462.631	2064.72	HIT000338598	1	-	201984924	201985322	398	1	HIX0093868	Antisense	H-InvDB
p26591	5.29575e-07	0.451392	1	4.39025	4.39025	4.39025	4.39025	4.39025	4.39025	HIT000078763	1	-	227884732	227885408	676	2	HIX0028603	Intergenic	H-InvDB
p26594	3.85661e-06	1.3096e-06	1	4.39025	4.39025	4.39025	4.39025	4.39025	4.39025	HIT000095376	1	+	17028040	17032089	4049	3	HIX0029283	Intergenic	H-InvDB
p26597	1.45835e-05	2.20331e-09	1	4.39025	4.39025	4.39025	4.39025	4.39025	4.39025	HIT000217202	1	+	89647180	89647394	214	1	HIX0029728	Antisense	H-InvDB
p26598	8.24241e-08	0.000494741	1.64611	338.239	8.62268	365.652	473.05	116.646	583.183	HIT000245015	1	+	154235975	154236277	302	1	HIX0001103	Intronic	H-InvDB
p26600	3.3078e-05	6.60648e-09	1	4.39025	4.39025	4.39025	4.39025	4.39025	4.39025	HIT000078377	1	+	184431526	184431933	407	1	HIX0029052	Intronic	H-InvDB
p26603	0.000170858	0.000357039	0.614598	1167.97	862.285	1002.62	200.721	581.126	1082.15	HIT000338244	1	+	222886169	222887245	1076	2	HIX0001617	Antisense	H-InvDB
p269	0.247215	1.4877e-06	1	4.39025	4.39025	4.39025	4.39025	4.39025	4.39025	ENST00000443562.1	1	-	90048799	90097750	48951	5	ENSG00000231999.2	Antisense	ENSEMBL
p26953	3.99035e-15	0.52545	1	4.39025	4.39025	4.39025	4.39025	4.39025	4.39025	uc.2-	1	-	10732542	10732749	207	1	uc.2-	Intronic	UCR
p26957	9.79986e-11	0.0214317	1.54544	66.1514	64.3039	19.77	80.6438	62.0343	89.4859	uc.6-	1	-	10795120	10795421	301	1	uc.6-	Intronic	UCR
p26959	3.83255e-05	0.00280541	0.608392	57.5681	50.1938	85.2879	7.43436	69.8477	40.168	uc.8-	1	-	10851817	10852033	216	1	uc.8-	Intronic	UCR
p26961	6.01269e-10	0.000690359	1.18896	99.1989	118.651	140.741	127.556	194.799	103.996	uc.10-	1	-	10965573	10965848	275	1	uc.10-	Intergenic	UCR
p26962	1.06738e-07	0.0017508	1.15962	2894.27	3918.45	2244.64	3436.8	968.635	6097.64	uc.12-	1	-	35650226	35650427	201	1	uc.12-	Intronic	UCR
p26964	1.77257e-10	0.462014	1	4.39025	4.39025	4.39025	4.39025	4.39025	4.39025	uc.14-	1	-	38495003	38495216	213	1	uc.14-	Intergenic	UCR
p26971	0.00132557	0.00517972	0.363469	84.8686	82.5913	70.865	41.4839	2.66555	42.4743	uc.21-	1	-	49112985	49113220	235	1	uc.21-	Intronic	UCR
p26973	2.27854e-08	4.70206e-15	1	4.39025	4.39025	4.39025	4.39025	4.39025	4.39025	uc.23-	1	-	51035776	51036005	229	1	uc.23-	Intronic	UCR
p26975	3.91415e-09	0.091403	1.39527	94.3456	35.3231	150.065	157.59	66.4042	166.31	uc.25-	1	-	51166033	51166268	235	1	uc.25-	Intronic	UCR
p26985	5.04322e-10	1.57476e-14	1	4.39025	4.39025	4.39025	4.39025	4.39025	4.39025	uc.36-	1	-	109240427	109240691	264	1	uc.36-	Intronic	UCR
p26989	4.4365e-11	2.2421e-13	1	4.39025	4.39025	4.39025	4.39025	4.39025	4.39025	uc.40-	1	-	164637961	164638208	247	1	uc.40-	Intronic	UCR
p26990	0.0011356	7.76437e-15	1	4.39025	4.39025	4.39025	4.39025	4.39025	4.39025	uc.41-	1	-	213598766	213598982	216	1	uc.41-	Intergenic	UCR
p26992	2.84593e-07	6.41894e-05	1.18178	707.644	74.35	652.189	358.546	108.039	1228.31	uc.43-	1	-	243896034	243896291	257	1	uc.43-	Intronic	UCR
p26999	1.06319e-10	6.32519e-10	1	4.39025	4.39025	4.39025	4.39025	4.39025	4.39025	uc.6+	1	+	10795120	10795421	301	1	uc.6+	Intronic	UCR
p270	5.76975e-09	6.29481e-15	0.53915	95.4796	153.644	189.015	7.71119	23.1338	205.377	ENST00000415584.2	1	-	90090408	90098453	8045	3	ENSG00000231999.2	Divergent	ENSEMBL
p27001	0.0394331	0.000233235	1	4.39025	4.39025	4.39025	4.39025	4.39025	4.39025	uc.8+	1	+	10851817	10852033	216	1	uc.8+	Intronic	UCR
p27004	9.16584e-06	8.47268e-07	1	4.39025	4.39025	4.39025	4.39025	4.39025	4.39025	uc.12+	1	+	35650226	35650427	201	1	uc.12+	Intronic	UCR
p27006	0.460184	2.16075e-12	1	4.39025	4.39025	4.39025	4.39025	4.39025	4.39025	uc.14+	1	+	38495003	38495216	213	1	uc.14+	Intergenic	UCR
p27015	5.47298e-06	7.41746e-09	1	4.39025	4.39025	4.39025	4.39025	4.39025	4.39025	uc.23+	1	+	51035776	51036005	229	1	uc.23+	Intronic	UCR
p27017	1.79749e-06	0.00141463	0.464719	63.1044	32.9611	85.7015	18.186	1.63878	64.6457	uc.25+	1	+	51166033	51166268	235	1	uc.25+	Intronic	UCR
p27020	0.0330475	5.92984e-12	1	4.39025	4.39025	4.39025	4.39025	4.39025	4.39025	uc.28+	1	+	70696712	70697067	355	1	uc.28+	Intronic	UCR
p27023	0.00401046	2.75446e-07	1.16507	62.3755	55.2435	40.4728	67.1119	91.0689	26.0072	uc.31+	1	+	88928017	88928270	253	1	uc.31+	Intergenic	UCR
p27025	3.64252e-07	0.00187884	2.09437	115.408	87.9902	102.056	39.7611	179.09	420.885	uc.35+	1	+	98002281	98002486	205	1	uc.35+	Intronic	UCR
p27026	0.000262171	2.00057e-05	1	4.39025	4.39025	4.39025	4.39025	4.39025	4.39025	uc.36+	1	+	109240427	109240691	264	1	uc.36+	Intronic	UCR
p27033	0.00557647	0.00254221	1	4.39025	4.39025	4.39025	4.39025	4.39025	4.39025	uc.43+	1	+	243896034	243896291	257	1	uc.43+	Intronic	UCR
p27035	9.23903e-09	6.14337e-10	1	4.39025	4.39025	4.39025	4.39025	4.39025	4.39025	uc.46+	1	+	245017602	245017819	217	1	uc.46+	Antisense	UCR
p271	1.41042e-10	0.707798	1	4.39025	4.39025	4.39025	4.39025	4.39025	4.39025	ENST00000526694.1	1	-	90091819	90098306	6487	3	ENSG00000231999.2	Divergent	ENSEMBL
p272	9.6624e-11	4.18757e-06	2.25594	317.25	152.27	50.7361	169.857	351.287	652.521	ENST00000528692.1	1	-	90097434	90098320	886	2	ENSG00000231999.2	Divergent	ENSEMBL
p276	0.0729616	6.86871e-07	1.19155	220.516	225.189	154.821	226.761	226.174	262.622	ENST00000435649.1	1	-	91297081	91317175	20094	2	ENSG00000233593.1	Intergenic	ENSEMBL
p278	0.0955815	3.71975e-07	1	4.39025	4.39025	4.39025	4.39025	4.39025	4.39025	ENST00000413606.1	1	-	93727742	93811388	83646	7	ENSG00000223745.2	Antisense	ENSEMBL
p279	1.29296e-09	0.948938	1	4.39025	4.39025	4.39025	4.39025	4.39025	4.39025	ENST00000414430.1	1	-	93730228	93780826	50598	4	ENSG00000223745.2	Antisense	ENSEMBL
p283	0.0641931	4.82504e-10	0.814076	2975.57	1995.57	4726.4	1006.18	3213.03	3675.34	ENST00000452347.1	1	-	93804251	93811405	7154	5	ENSG00000223745.2	Divergent	ENSEMBL
p285	0.237455	0.167814	1	4.39025	4.39025	4.39025	4.39025	4.39025	4.39025	ENST00000449305.1	1	-	93804485	93811340	6855	5	ENSG00000223745.2	Divergent	ENSEMBL
p287	0.129969	2.20037e-08	1	4.39025	4.39025	4.39025	4.39025	4.39025	4.39025	ENST00000445076.1	1	-	93804495	93811384	6889	3	ENSG00000223745.2	Divergent	ENSEMBL
p28926	0.207542	1.3541e-06	1	4.39025	4.39025	4.39025	4.39025	4.39025	4.39025	ENST00000430109.1	1	-	1365918	1369953	4035	2	ENSG00000225285.1	Divergent	ENSEMBL
p28928	0.408796	0.00387797	0.663403	2700.75	3604.64	2289.65	1002.18	1703.34	2996.46	ENST00000432521.2	1	-	2481721	2485589	3868	2	ENSG00000238164.2	Intergenic	ENSEMBL
p28933	0.361876	4.77143e-06	0.671533	1096.03	1423.02	999.533	1411.39	20.8083	930.641	ENST00000461448.1	1	-	28905049	28908354	3305	4	ENSG00000197989.8	Antisense	ENSEMBL
p28934	3.10319e-06	1.88093e-07	0.884332	3478.35	4475.3	1958.27	3888.14	2396.6	2480.69	ENST00000488745.1	1	-	28905052	28909495	4443	6	ENSG00000197989.8	Antisense	ENSEMBL
p28938	0.0091278	4.99382e-12	1.39413	115.789	90.7853	136.538	94.5714	141.814	241.958	ENST00000415842.1	1	-	65445259	65468159	22900	6	ENSG00000226891.1	Intergenic	ENSEMBL
p28941	0.00909806	0.00295653	1.10898	1221.54	155.237	537.325	818.825	532.596	771.281	ENST00000440778.1	1	-	93775309	93804091	28782	6	ENSG00000223745.2	Intergenic	ENSEMBL
p28946	9.65914e-06	1.30065e-13	1	4.39025	4.39025	4.39025	4.39025	4.39025	4.39025	ENST00000437515.1	1	-	121102016	121139765	37749	4	ENSG00000230806.1	Antisense	ENSEMBL
p28949	4.07752e-06	7.77075e-14	1.4073	393.986	476.415	476.826	527.086	671.974	696.893	ENST00000416367.1	1	-	143236904	143275032	38128	6	ENSG00000225278.2	Intergenic	ENSEMBL
p28951	0.757095	0.0239998	1	4.39025	4.39025	4.39025	4.39025	4.39025	4.39025	ENST00000422036.1	1	-	144276397	144311493	35096	5	ENSG00000235398.2	Intronic	ENSEMBL
p28955	9.9516e-05	3.82504e-12	1	4.39025	4.39025	4.39025	4.39025	4.39025	4.39025	ENST00000482381.1	1	-	146126403	146136197	9794	3	ENSG00000227733.3	Intronic	ENSEMBL
p28956	2.84114e-10	0.000211212	1	4.39025	4.39025	4.39025	4.39025	4.39025	4.39025	ENST00000414848.1	1	-	158101833	158110429	8596	3	ENSG00000231666.1	Intergenic	ENSEMBL
p28959	9.62234e-11	3.13747e-08	0.712584	3996.8	4642.76	3338.1	4516.26	2837.77	1181.05	ENST00000431268.1	1	-	173833038	173837127	4089	8	ENSG00000234741.2	Divergent	ENSEMBL
p28961	0.0397231	7.246e-12	1	4.39025	4.39025	4.39025	4.39025	4.39025	4.39025	ENST00000421505.1	1	-	178060642	178063119	2477	2	ENSG00000224687.1	Antisense	ENSEMBL
p28962	9.79502e-11	3.31702e-13	1	4.39025	4.39025	4.39025	4.39025	4.39025	4.39025	ENST00000367207.3	1	-	204001574	204010393	8819	5	ENSG00000176754.8	Intergenic	ENSEMBL
p28964	4.15912e-09	4.63795e-05	1	4.39025	4.39025	4.39025	4.39025	4.39025	4.39025	ENST00000602529.1	1	-	228462284	228463767	1483	1	ENSG00000269934.1	Antisense	ENSEMBL
p28966	0.00290423	1.77139e-06	1	4.39025	4.39025	4.39025	4.39025	4.39025	4.39025	ENST00000496488.1	1	+	160445	161525	1080	2	ENSG00000241599.1	Intergenic	ENSEMBL
p28968	9.63762e-11	1.3456e-07	1.59473	328.611	378.002	129.339	444.386	75.8534	812.879	ENST00000587530.1	1	+	719749	740507	20758	4	ENSG00000237491.3	Intergenic	ENSEMBL
p28972	0.401696	0.0293543	1	4.39025	4.39025	4.39025	4.39025	4.39025	4.39025	ENST00000416598.2	1	+	58326203	58328887	2684	2	ENSG00000226759.2	Intronic	ENSEMBL
p28974	4.46375e-09	0.0749434	1.84356	64.4997	9.63633	35.0972	92.6514	67.5083	41.2179	ENST00000455406.1	1	+	71547006	71703406	156400	4	ENSG00000229956.4	Divergent	ENSEMBL
p28980	0.00422235	0.00652994	1.04958	126.889	83.3264	97.8366	193.577	6.67237	123.077	ENST00000427471.1	1	+	112452269	112453553	1284	3	ENSG00000237556.1	Intronic	ENSEMBL
p28982	8.92225e-06	8.47231e-05	0.814757	412.784	406.712	391.161	130.931	162.972	692.488	ENST00000421330.1	1	+	143348739	143351483	2744	3	ENSG00000242569.1	Intergenic	ENSEMBL
p28989	0.0378046	6.7696e-16	0.914652	1416.34	715.82	468.282	848.845	168.753	1360.9	ENST00000415104.1	1	+	148598397	148599531	1134	2	ENSG00000237253.1	Intergenic	ENSEMBL
p28991	3.68945e-08	0.121289	1	4.39025	4.39025	4.39025	4.39025	4.39025	4.39025	ENST00000440084.1	1	+	149576160	149641425	65265	7	ENSG00000232151.4	Intergenic	ENSEMBL
p28994	0.684107	0.340816	1	4.39025	4.39025	4.39025	4.39025	4.39025	4.39025	ENST00000441676.1	1	+	222988402	223010726	22324	3	ENSG00000228106.1	Antisense	ENSEMBL
p292	0.00445643	0.00887013	1	4.39025	4.39025	4.39025	4.39025	4.39025	4.39025	ENST00000452922.1	1	-	95123088	95285837	162749	5	ENSG00000224081.3	Divergent	ENSEMBL
p294	0.127237	0.385975	1	4.39025	4.39025	4.39025	4.39025	4.39025	4.39025	ENST00000432162.1	1	-	95138452	95197901	59449	3	ENSG00000224081.3	Intergenic	ENSEMBL
p295	0.00335519	0.0461269	1	4.39025	4.39025	4.39025	4.39025	4.39025	4.39025	ENST00000421997.1	1	-	95138684	95285775	147091	4	ENSG00000224081.3	Divergent	ENSEMBL
p29550	0.00585515	7.60215e-13	1	4.39025	4.39025	4.39025	4.39025	4.39025	4.39025	TCONS_00000075	1	-	2481358	2484284	2926	3	XLOC_000678	Intergenic	HumanLincRNACatalog
p29555	1.40165e-10	0.000399355	1	4.39025	4.39025	4.39025	4.39025	4.39025	4.39025	TCONS_00001570	1	-	90076597	90098553	21956	3	XLOC_000909	Divergent	HumanLincRNACatalog
p29557	9.20112e-08	5.32986e-09	1.45636	81.396	69.235	0.905753	39.8185	91.8722	89.0017	TCONS_00001580	1	-	91248094	91317232	69138	3	XLOC_000915	Intergenic	HumanLincRNACatalog
p29558	0.000199157	0.00172851	1.44889	397.755	518.985	219.423	116.372	791.049	738.76	TCONS_00000020	1	-	93775665	93811368	35703	9	XLOC_000918	Divergent	HumanLincRNACatalog
p29569	3.91506e-09	4.12763e-08	1	4.39025	4.39025	4.39025	4.39025	4.39025	4.39025	TCONS_00000033	1	+	1535818	1543166	7348	3	XLOC_000019	Divergent	HumanLincRNACatalog
p29571	1.72001e-10	0.000431259	1	4.39025	4.39025	4.39025	4.39025	4.39025	4.39025	TCONS_00001929	1	+	5058061	5063844	5783	5	XLOC_000036	Intergenic	HumanLincRNACatalog
p29576	5.58459e-10	2.18174e-07	1	4.39025	4.39025	4.39025	4.39025	4.39025	4.39025	TCONS_00002052	1	+	67987995	67998014	10019	3	XLOC_000236	Intergenic	HumanLincRNACatalog
p29578	0.133732	0.000428396	1	4.39025	4.39025	4.39025	4.39025	4.39025	4.39025	TCONS_00000336	1	+	173831289	173833079	1790	2	XLOC_000467	Intergenic	HumanLincRNACatalog
p296	0.0241756	0.0547295	1.38464	79.618	20.0448	30.5906	95.2546	30.6063	54.4938	ENST00000414374.1	1	-	95144980	95285766	140786	2	ENSG00000224081.3	Divergent	ENSEMBL
p298	1.37105e-09	0.148119	1.00156	115.206	114.063	2.51483	54.4234	48.6569	129.065	ENST00000422162.1	1	-	95302303	95320982	18679	4	ENSG00000237416.2	Antisense	ENSEMBL
p299	1.07394e-10	1.20134e-09	1	4.39025	4.39025	4.39025	4.39025	4.39025	4.39025	ENST00000532087.1	1	-	95308663	95320982	12319	2	ENSG00000237416.2	Antisense	ENSEMBL
p3	0.242254	0.000244363	1.38869	4311.93	2697.09	4599.91	4131.16	4040.72	7949.37	ENST00000490997.1	1	-	142807	146831	4024	3	ENSG00000241860.2	Intergenic	ENSEMBL
p300	0.000982951	6.93592e-05	1.62161	167.684	42.3305	24.2926	140.862	30.9581	208.134	ENST00000419846.1	1	-	95639679	95699535	59856	4	ENSG00000226026.1	Antisense	ENSEMBL
p30031	1.06549e-08	4.84921e-05	1	4.39025	4.39025	4.39025	4.39025	4.39025	4.39025	NR_038914.1	1	-	101092604	101112560	19956	5	LOC100128787	Intergenic	RefSeq
p30034	4.0117e-05	0.000966774	1.20168	4225.17	1077.96	4656.76	3403.08	3859.24	4706.32	NR_027469.1	1	-	143718512	143744587	26075	5	LOC100286793	Intergenic	RefSeq
p30038	4.02307e-12	0.185426	1	4.39025	4.39025	4.39025	4.39025	4.39025	4.39025	NR_036473.1	1	+	28832454	28837404	4950	4	SNHG3	Antisense	RefSeq
p30040	3.11452e-10	0.000293975	1	4.39025	4.39025	4.39025	4.39025	4.39025	4.39025	XR_110481.3	1	+	101547597	101552824	5227	2	LOC100506029	Intergenic	RefSeq
p30177	1.15264e-08	0.00222512	1	4.39025	4.39025	4.39025	4.39025	4.39025	4.39025	uc001eng.1	1	-	145372087	145373798	1711	1	AX747132	Intronic	UCSC
p30178	1.59389e-10	0.0110792	1	4.39025	4.39025	4.39025	4.39025	4.39025	4.39025	uc001ggd.3	1	-	169411875	169429907	18032	6	BC041451	Intergenic	UCSC
p30183	1.95597e-09	0.0340135	0.992437	50.6047	64.3056	1.75214	39.8706	46.9916	28.9179	uc001hpx.3	1	+	226271655	226277994	6339	4	BC032899	Intergenic	UCSC
p307	3.9861e-07	0.0270048	1	4.39025	4.39025	4.39025	4.39025	4.39025	4.39025	ENST00000435311.1	1	-	96719624	96839681	120057	6	ENSG00000231987.1	Intergenic	ENSEMBL
p31	0.0736359	6.94338e-07	1.40976	4730.82	687.162	2240.05	3708.42	2053.68	5033.86	ENST00000420964.1	1	-	2143609	2144013	404	2	ENSG00000243558.1	Antisense	ENSEMBL
p314	0.00958096	0.420882	1	4.39025	4.39025	4.39025	4.39025	4.39025	4.39025	ENST00000438829.1	1	-	99937917	99999571	61654	4	ENSG00000224445.1	Intergenic	ENSEMBL
p315	3.53323e-06	1.03236e-09	1	4.39025	4.39025	4.39025	4.39025	4.39025	4.39025	ENST00000432294.1	1	-	100523545	100550027	26482	2	ENSG00000241073.1	Antisense	ENSEMBL
p32	8.93124e-06	2.12089e-06	1	4.39025	4.39025	4.39025	4.39025	4.39025	4.39025	ENST00000602865.1	1	-	2281852	2284259	2407	1	ENSG00000269896.1	Intronic	ENSEMBL
p323	2.40681e-08	0.000639274	1	4.39025	4.39025	4.39025	4.39025	4.39025	4.39025	ENST00000594455.1	1	-	106143113	106148629	5516	3	ENSG00000230768.2	Intergenic	ENSEMBL
p33342	9.6224e-11	0.0550121	1.20307	709.22	491.166	40.2403	474.775	625.455	392.332	ENST00000598846.1	1	-	1634174	1669127	34953	20	ENSG00000268575.1	Antisense	ENSEMBL
p33346	4.68952e-09	0.147845	0.989323	115.049	161.603	25.7326	183.475	90.1147	25.5663	ENST00000507727.1	1	-	95448744	95492759	44015	3	ENSG00000250094.1	Antisense	ENSEMBL
p33351	0.611135	0.00432565	1	4.39025	4.39025	4.39025	4.39025	4.39025	4.39025	ENST00000420462.1	1	-	149754432	149783312	28880	2	ENSG00000242663.1	Antisense	ENSEMBL
p33355	0.277733	4.48012e-05	1	4.39025	4.39025	4.39025	4.39025	4.39025	4.39025	ENST00000601814.1	1	+	323860	334505	10645	3	ENSG00000237094.5	Intergenic	ENSEMBL
p33356	8.13895e-07	1.40747e-07	1	4.39025	4.39025	4.39025	4.39025	4.39025	4.39025	ENST00000414128.1	1	+	17181901	17185779	3878	3	ENSG00000230239.1	Intergenic	ENSEMBL
p33358	0.350461	0.000939241	1	4.39025	4.39025	4.39025	4.39025	4.39025	4.39025	ENST00000426275.1	1	+	120906608	120935761	29153	2	ENSG00000234998.1	Antisense	ENSEMBL
p33361	0.000276055	0.00143682	1.19542	89.8131	27.1455	52.8327	50.2079	30.8679	121.896	ENST00000431621.1	1	+	143355261	143379903	24642	9	ENSG00000242569.1	Intergenic	ENSEMBL
p33363	1.33941e-07	5.94773e-06	1.76823	40435.8	44610.6	8309.59	25501.9	99256	40317.1	ENST00000420597.1	1	+	148928321	148932920	4599	2	ENSG00000232527.3	Intergenic	ENSEMBL
p33364	1.6808e-06	3.18617e-14	1.62567	41759.3	35100.9	31771.6	76733.7	60471.6	39394.4	ENST00000294715.2	1	+	148928330	148933368	5038	3	ENSG00000232527.3	Intergenic	ENSEMBL
p33367	0.00147994	0.649794	1.05596	204.003	250.739	71.6991	157.396	180.28	218.225	ENST00000451937.1	1	+	209602204	209605752	3548	4	ENSG00000230937.3	Antisense	ENSEMBL
p335	1.23546e-10	1.71496e-11	1.41956	1219.84	506.821	938.257	455.331	1141.11	2186.59	ENST00000440688.1	1	-	110720264	110721341	1077	2	ENSG00000235526.1	Intronic	ENSEMBL
p336	9.65201e-11	0.000561116	1	4.39025	4.39025	4.39025	4.39025	4.39025	4.39025	ENST00000455967.1	1	-	110751455	110752609	1154	2	ENSG00000224965.1	Divergent	ENSEMBL
p33651	6.17741e-07	6.81716e-12	1	4.39025	4.39025	4.39025	4.39025	4.39025	4.39025	NR_028399.1	1	+	231664398	231838307	173909	9	TSNAX-DISC1	Antisense	RefSeq
p33652	1.2592e-07	2.65249e-05	1	4.39025	4.39025	4.39025	4.39025	4.39025	4.39025	NR_028400.1	1	+	231664398	231886365	221967	8	TSNAX-DISC1	Antisense	RefSeq
p337	1.03287e-10	0.000276129	1	4.39025	4.39025	4.39025	4.39025	4.39025	4.39025	ENST00000449169.1	1	-	110828996	110881793	52797	4	ENSG00000227963.1	Divergent	ENSEMBL
p33731	6.55162e-10	0.227169	1	4.39025	4.39025	4.39025	4.39025	4.39025	4.39025	uc021owu.1	1	-	148276555	148279343	2788	4	AF380582	Intronic	UCSC
p33735	9.6237e-11	0.316633	1	4.39025	4.39025	4.39025	4.39025	4.39025	4.39025	uc001aoy.1	1	+	8043018	8045341	2323	1	AX747125	Antisense	UCSC
p33736	0.0195379	7.81092e-10	1	4.39025	4.39025	4.39025	4.39025	4.39025	4.39025	uc021ogj.1	1	+	12568347	12570415	2068	1	AK095438	Antisense	UCSC
p33737	1.24733e-05	0.00151804	1	4.39025	4.39025	4.39025	4.39025	4.39025	4.39025	uc001avl.1	1	+	14146461	14150513	4052	1	AK124197	Antisense	UCSC
p33742	0.0655407	0.000169312	1	4.39025	4.39025	4.39025	4.39025	4.39025	4.39025	uc010plg.2	1	+	167190065	167365664	175599	12	POU2F1	Antisense	UCSC
p33743	0.646254	5.57945e-12	0.917002	1146.01	676.352	263.037	512.311	182.017	1217.99	uc001gic.1	1	+	171763732	171766852	3120	1	AK094818	Antisense	UCSC
p33745	0.000275531	0.888904	1.24497	7375.63	1175.11	2318.71	3387.19	2097.24	8047.75	uc001hog.1	1	+	224189608	224197818	8210	3	AK124970	Intergenic	UCSC
p338	2.01273e-09	0.0029446	1	4.39025	4.39025	4.39025	4.39025	4.39025	4.39025	ENST00000457402.1	1	-	111030301	111032880	2579	2	ENSG00000235407.1	Intergenic	ENSEMBL
p33851	0.171756	1.02608e-09	1.46338	3019.36	1840.01	808.548	736.102	4237.46	3320.78	HIT000083801	1	-	11863084	11865993	2909	2	HIX0019544	Antisense	H-InvDB
p343	0.00311554	0.00441003	1	4.39025	4.39025	4.39025	4.39025	4.39025	4.39025	ENST00000416099.1	1	-	111981261	111983850	2589	2	ENSG00000243960.1	Antisense	ENSEMBL
p344	0.000133212	9.67218e-07	1.63943	98.2148	34.1053	57.2522	101.769	81.6286	127.394	ENST00000441004.1	1	-	112142486	112150946	8460	5	ENSG00000231346.1	Intergenic	ENSEMBL
p346	7.44904e-08	0.000140711	1	4.39025	4.39025	4.39025	4.39025	4.39025	4.39025	ENST00000439736.1	1	-	112396383	112399527	3144	2	ENSG00000232558.1	Intronic	ENSEMBL
p347	2.12986e-08	0.0282915	1	4.39025	4.39025	4.39025	4.39025	4.39025	4.39025	ENST00000427290.1	1	-	112719855	112903150	183295	2	ENSG00000231246.1	Intergenic	ENSEMBL
p349	0.0851084	0.938234	0.96046	107.873	155.023	5.40751	15.5305	131.22	110.944	ENST00000421943.1	1	-	113236309	113239243	2934	3	ENSG00000225075.1	Antisense	ENSEMBL
p350	0.108664	0.0208406	1	4.39025	4.39025	4.39025	4.39025	4.39025	4.39025	ENST00000433505.1	1	-	113362791	113392437	29646	4	ENSG00000215866.2	Intergenic	ENSEMBL
p351	8.01498e-08	2.95924e-16	0.874204	203.831	279.369	239.65	75.7601	192.517	363.642	ENST00000421157.1	1	-	113554308	113615727	61419	3	ENSG00000238198.1	Divergent	ENSEMBL
p354	0.00882398	0.0520667	1	4.39025	4.39025	4.39025	4.39025	4.39025	4.39025	ENST00000450706.1	1	-	114466622	114471880	5258	5	ENSG00000235527.2	Divergent	ENSEMBL
p357	1.98374e-09	0.0924691	1	4.39025	4.39025	4.39025	4.39025	4.39025	4.39025	ENST00000453128.1	1	-	116556433	116560326	3893	3	ENSG00000237993.1	Intronic	ENSEMBL
p36	0.379937	0.00859114	1	4.39025	4.39025	4.39025	4.39025	4.39025	4.39025	ENST00000416860.2	1	-	2481358	2488450	7092	6	ENSG00000238164.2	Antisense	ENSEMBL
p365	1.47616e-06	0.0603166	1.78749	279.439	21.8726	255.811	448.631	412.447	134.773	ENST00000445523.1	1	-	117568103	117602112	34009	4	ENSG00000236137.1	Antisense	ENSEMBL
p366	1.55843e-06	2.97984e-18	1	4.39025	4.39025	4.39025	4.39025	4.39025	4.39025	ENST00000421254.1	1	-	117568918	117575143	6225	2	ENSG00000236137.1	Intronic	ENSEMBL
p367	0.000737771	0.00403654	1.08409	58.8692	10.3115	91.4004	41.2535	86.2922	46.5389	ENST00000440801.1	1	-	118139453	118148333	8880	3	ENSG00000236866.1	Divergent	ENSEMBL
p368	1.78879e-08	1.51965e-07	1	4.39025	4.39025	4.39025	4.39025	4.39025	4.39025	ENST00000425010.1	1	-	118146620	118148392	1772	3	ENSG00000236866.1	Divergent	ENSEMBL
p37	0.00297929	0.0999257	1	4.39025	4.39025	4.39025	4.39025	4.39025	4.39025	ENST00000452793.1	1	-	2485679	2488470	2791	4	ENSG00000238164.2	Antisense	ENSEMBL
p373	1.06865e-05	1.63953e-08	0.909713	64.0413	27.3931	84.2819	34.8276	86.0886	38.9353	ENST00000457719.1	1	-	119802887	119869926	67039	3	ENSG00000227712.1	Intergenic	ENSEMBL
p375	0.000197794	0.000439515	1	4.39025	4.39025	4.39025	4.39025	4.39025	4.39025	ENST00000566949.1	1	-	120451877	120453236	1359	1	ENSG00000261662.1	Divergent	ENSEMBL
p379	0.0164912	0.119799	1.03684	110.627	102.938	14.32	69.2712	38.6746	128.333	ENST00000369381.2	1	-	142620644	142714605	93961	9	ENSG00000203849.5	Intergenic	ENSEMBL
p382	0.000297364	3.09801e-05	1.33603	135.727	67.8856	83.477	161.767	50.2899	171.503	ENST00000422129.1	1	-	143118703	143194342	75639	2	ENSG00000232274.1	Intergenic	ENSEMBL
p384	0.00027898	7.35119e-17	0.698077	59.8051	63.2933	72.659	79.3572	29.1867	28.1098	ENST00000447389.1	1	-	143188794	143196803	8009	4	ENSG00000232274.1	Intergenic	ENSEMBL
p388	6.94555e-06	0.000215449	1	4.39025	4.39025	4.39025	4.39025	4.39025	4.39025	ENST00000422716.1	1	-	143213236	143240439	27203	9	ENSG00000225278.2	Intergenic	ENSEMBL
p39	1.51176e-10	5.38839e-07	0.611454	74.1045	33.5916	85.8483	12.2581	20.882	85.2035	ENST00000429389.1	1	-	2730996	2731563	567	2	ENSG00000231630.1	Intergenic	ENSEMBL
p391	1.44916e-09	1.27718e-05	1	4.39025	4.39025	4.39025	4.39025	4.39025	4.39025	ENST00000423249.1	1	-	143354962	143465438	110476	4	ENSG00000185044.8	Intergenic	ENSEMBL
p392	0.00214204	0.000747235	1	4.39025	4.39025	4.39025	4.39025	4.39025	4.39025	ENST00000424068.1	1	-	143356624	143467304	110680	5	ENSG00000185044.8	Intergenic	ENSEMBL
p394	4.54443e-08	0.00503536	1.36345	196.784	210.43	236.166	57.2345	127.95	692.036	ENST00000436326.1	1	-	143429871	143467644	37773	4	ENSG00000185044.8	Intergenic	ENSEMBL
p396	0.841827	0.0004586	1.10502	3302.17	77.5378	3138.8	327.795	3888.77	2986.49	ENST00000329536.8	1	-	143465379	143467604	2225	2	ENSG00000185044.8	Intergenic	ENSEMBL
p399	0.265783	8.9792e-06	1.10839	2813.99	2721.53	1993.9	739.392	3570.43	4035.71	ENST00000442423.1	1	-	143719662	143721171	1509	2	ENSG00000226637.1	Intergenic	ENSEMBL
p400	1.10297e-06	3.58421e-11	1	4.39025	4.39025	4.39025	4.39025	4.39025	4.39025	ENST00000418192.1	1	-	143743239	143744355	1116	2	ENSG00000223804.1	Intergenic	ENSEMBL
p411	4.78415e-07	4.72137e-05	1	4.39025	4.39025	4.39025	4.39025	4.39025	4.39025	ENST00000421937.2	1	-	145373053	145375672	2619	2	ENSG00000227280.2	Intronic	ENSEMBL
p417	6.08496e-07	2.71961e-14	1	4.39025	4.39025	4.39025	4.39025	4.39025	4.39025	ENST00000598103.1	1	-	145484750	145507857	23107	3	ENSG00000234222.2	Intronic	ENSEMBL
p418	0.638703	3.3856e-11	1	4.39025	4.39025	4.39025	4.39025	4.39025	4.39025	ENST00000598354.1	1	-	145486033	145507857	21824	3	ENSG00000234222.2	Intronic	ENSEMBL
p419	1.43647e-09	0.000387096	1	4.39025	4.39025	4.39025	4.39025	4.39025	4.39025	ENST00000599469.1	1	-	145486042	145507857	21815	5	ENSG00000234222.2	Intronic	ENSEMBL
p42	2.15334e-07	6.11885e-15	1	4.39025	4.39025	4.39025	4.39025	4.39025	4.39025	ENST00000321336.1	1	-	2980635	2984333	3698	2	ENSG00000177133.5	Intergenic	ENSEMBL
p421	0.074742	1.51018e-08	1	4.39025	4.39025	4.39025	4.39025	4.39025	4.39025	ENST00000437207.1	1	-	145486271	145493959	7688	3	ENSG00000234222.2	Intronic	ENSEMBL
p423	0.0367283	5.8215e-11	0.852009	113.944	166.718	193.636	191.683	126.892	85.5309	ENST00000366105.2	1	-	145492838	145493891	1053	2	ENSG00000234222.2	Intronic	ENSEMBL
p425	0.000976416	2.31469e-06	2.10051	755.173	205.592	148.92	577.51	750.342	1003.05	ENST00000412239.1	1	-	145493883	145508218	14335	3	ENSG00000234222.2	Intronic	ENSEMBL
p426	1.83781e-08	0.00131269	1.07035	316.288	300.408	46.8459	193.824	79.067	437.332	ENST00000601726.1	1	-	145493892	145507857	13965	3	ENSG00000234222.2	Intronic	ENSEMBL
p439	1.63364e-07	6.63819e-06	1	4.39025	4.39025	4.39025	4.39025	4.39025	4.39025	ENST00000455718.1	1	-	146473734	146474743	1009	3	ENSG00000234225.1	Intergenic	ENSEMBL
p441	6.06088e-10	1.86895e-07	1	4.39025	4.39025	4.39025	4.39025	4.39025	4.39025	ENST00000428035.1	1	-	147744013	147752855	8842	3	ENSG00000234283.1	Intronic	ENSEMBL
p446	1.88883e-09	4.26204e-05	1.08188	19354.7	53215.6	86880.7	54807.2	99323.9	18375.8	ENST00000447883.2	1	-	149576593	149577296	703	2	ENSG00000233368.2	Intergenic	ENSEMBL
p447	7.63696e-08	0.401698	2.63429	1381.41	6.4423	800.641	330.567	1247.33	4187.23	ENST00000594899.1	1	-	149587501	149587988	487	1	ENSG00000269614.1	Intergenic	ENSEMBL
p450	0.716941	5.96937e-08	1	4.39025	4.39025	4.39025	4.39025	4.39025	4.39025	ENST00000577853.1	1	-	149802875	149804109	1234	1	ENSG00000264207.1	Divergent	ENSEMBL
p451	0.0216687	1.96534e-11	1	4.39025	4.39025	4.39025	4.39025	4.39025	4.39025	ENST00000564237.1	1	-	149816064	149820591	4527	1	ENSG00000261716.1	Intergenic	ENSEMBL
p455	3.68402e-06	2.64844e-15	1	4.39025	4.39025	4.39025	4.39025	4.39025	4.39025	ENST00000512280.1	1	-	151735859	151741977	6118	3	ENSG00000249602.1	Antisense	ENSEMBL
p458	1.56034e-08	3.75295e-05	1	4.39025	4.39025	4.39025	4.39025	4.39025	4.39025	ENST00000446229.1	1	-	153615537	153618305	2768	2	ENSG00000233059.1	Antisense	ENSEMBL
p460	1.50015e-08	0.00467196	1	4.39025	4.39025	4.39025	4.39025	4.39025	4.39025	ENST00000434575.1	1	-	153723458	153724652	1194	2	ENSG00000233222.2	Antisense	ENSEMBL
p468	1.77777e-08	0.00137436	1	4.39025	4.39025	4.39025	4.39025	4.39025	4.39025	ENST00000450199.1	1	-	155289949	155293967	4018	2	ENSG00000225855.2	Antisense	ENSEMBL
p472	5.38225e-05	2.7565e-17	1	4.39025	4.39025	4.39025	4.39025	4.39025	4.39025	ENST00000423422.1	1	-	155955165	155976861	21696	4	ENSG00000241471.1	Intergenic	ENSEMBL
p474	0.00313145	1.83796e-13	1	4.39025	4.39025	4.39025	4.39025	4.39025	4.39025	ENST00000441085.1	1	-	156416203	156426258	10055	4	ENSG00000236947.1	Intergenic	ENSEMBL
p476	1.75433e-08	0.0710448	1	4.39025	4.39025	4.39025	4.39025	4.39025	4.39025	ENST00000448869.1	1	-	156616298	156631216	14918	2	ENSG00000229953.1	Antisense	ENSEMBL
p48	0.000221206	0.469383	1	4.39025	4.39025	4.39025	4.39025	4.39025	4.39025	ENST00000423764.1	1	-	3653712	3663900	10188	5	ENSG00000227372.5	Divergent	ENSEMBL
p486	0.260137	1.30726e-05	1	4.39025	4.39025	4.39025	4.39025	4.39025	4.39025	ENST00000562313.1	1	-	159994742	159996584	1842	1	ENSG00000260766.1	Divergent	ENSEMBL
p487	3.56171e-13	1.48957e-07	1.74022	717.423	375.616	421.406	647.255	590.496	1397.72	ENST00000418602.1	1	-	160171988	160178659	6671	5	ENSG00000227741.1	Antisense	ENSEMBL
p488	2.39755e-06	0.934956	1	4.39025	4.39025	4.39025	4.39025	4.39025	4.39025	ENST00000427339.1	1	-	160901528	160904170	2642	2	ENSG00000232188.1	Intergenic	ENSEMBL
p49	0.460599	4.10457e-05	1.10055	203.277	225.513	83.3433	216.608	176.58	170.443	ENST00000587071.1	1	-	3654638	3659422	4784	4	ENSG00000227372.5	Intergenic	ENSEMBL
p490	0.422059	9.83192e-07	1.30931	169.792	146.018	24.7213	132.474	48.4921	264.894	ENST00000419446.1	1	-	161526079	161526868	789	2	ENSG00000224515.1	Intergenic	ENSEMBL
p491	0.566318	0.0526825	1	4.39025	4.39025	4.39025	4.39025	4.39025	4.39025	ENST00000449604.1	1	-	161607437	161608218	781	2	ENSG00000231813.1	Intergenic	ENSEMBL
p492	0.0786975	1.49407e-06	1	4.39025	4.39025	4.39025	4.39025	4.39025	4.39025	ENST00000453111.1	1	-	161641767	161644614	2847	3	ENSG00000234211.1	Antisense	ENSEMBL
p496	6.78697e-05	0.265179	1.16169	116.373	151.668	48.4229	64.2608	197.625	105.749	ENST00000530241.1	1	-	163122399	163291541	169142	6	ENSG00000232995.2	Antisense	ENSEMBL
p502	3.55294e-08	2.01595e-09	1	4.39025	4.39025	4.39025	4.39025	4.39025	4.39025	ENST00000528689.1	1	-	163270452	163291542	21090	6	ENSG00000232995.2	Antisense	ENSEMBL
p504	1.10346e-10	8.05209e-06	1.7181	701.441	463.237	32.8802	396.647	152.289	1508.59	ENST00000528818.1	1	-	163288627	163291531	2904	2	ENSG00000232995.2	Antisense	ENSEMBL
p505	1.94746e-10	0.0101751	1.29133	343.618	350.925	315.665	308.971	401.603	593.932	ENST00000526176.1	1	-	163289016	163291564	2548	2	ENSG00000232995.2	Antisense	ENSEMBL
p513	4.35705e-08	2.59159e-09	0.579939	58.2626	45.7575	90.269	48.0238	23.8418	40.8102	ENST00000448643.1	1	-	166356963	166421869	64906	3	ENSG00000225325.1	Intergenic	ENSEMBL
p516	1.94963e-10	0.243247	1	4.39025	4.39025	4.39025	4.39025	4.39025	4.39025	ENST00000426709.1	1	-	167145153	167165026	19873	5	ENSG00000231605.1	Intergenic	ENSEMBL
p519	0.751178	0.000181071	1	4.39025	4.39025	4.39025	4.39025	4.39025	4.39025	ENST00000441851.1	1	-	168370066	168391894	21828	4	ENSG00000228697.1	Intergenic	ENSEMBL
p528	6.98845e-10	0.459561	1.62899	195.869	21.8999	73.8236	127.722	89.26	258.017	ENST00000416416.1	1	-	170429593	170486847	57254	2	ENSG00000231407.1	Intergenic	ENSEMBL
p529	6.31298e-07	8.68907e-14	1	4.39025	4.39025	4.39025	4.39025	4.39025	4.39025	ENST00000446102.1	1	-	170430457	170463681	33224	2	ENSG00000231407.1	Intergenic	ENSEMBL
p532	0.00107893	0.000492292	1	4.39025	4.39025	4.39025	4.39025	4.39025	4.39025	ENST00000426090.1	1	-	170556389	170557377	988	2	ENSG00000225545.1	Intergenic	ENSEMBL
p534	3.53389e-05	4.83915e-11	1	4.39025	4.39025	4.39025	4.39025	4.39025	4.39025	ENST00000417354.1	1	-	172109460	172113934	4474	4	ENSG00000230630.1	Intronic	ENSEMBL
p536	1.00558e-10	3.03355e-12	1	4.39025	4.39025	4.39025	4.39025	4.39025	4.39025	ENST00000367716.3	1	-	173386931	173430501	43570	2	ENSG00000203739.3	Intergenic	ENSEMBL
p542	9.62224e-11	0.00730062	1	4.39025	4.39025	4.39025	4.39025	4.39025	4.39025	ENST00000416952.1	1	-	173834305	173837126	2821	6	ENSG00000234741.2	Divergent	ENSEMBL
p544	0.000610183	0.694948	1	4.39025	4.39025	4.39025	4.39025	4.39025	4.39025	ENST00000443799.1	1	-	173834490	173837127	2637	5	ENSG00000234741.2	Divergent	ENSEMBL
p545	1.01034e-10	1.73909e-14	1	4.39025	4.39025	4.39025	4.39025	4.39025	4.39025	ENST00000421068.1	1	-	173834955	173837125	2170	3	ENSG00000234741.2	Divergent	ENSEMBL
p548	3.52912e-07	0.000256015	1	4.39025	4.39025	4.39025	4.39025	4.39025	4.39025	ENST00000419983.1	1	-	174084520	174129142	44622	4	ENSG00000227373.1	Antisense	ENSEMBL
p55	1.06581e-09	2.87835e-06	1	4.39025	4.39025	4.39025	4.39025	4.39025	4.39025	ENST00000419034.1	1	-	6503093	6507066	3973	3	ENSG00000231868.1	Antisense	ENSEMBL
p551	0.061764	0.000164024	1	4.39025	4.39025	4.39025	4.39025	4.39025	4.39025	ENST00000448686.1	1	-	174914659	174918013	3354	2	ENSG00000229531.1	Intronic	ENSEMBL
p552	2.24277e-09	0.00260874	1	4.39025	4.39025	4.39025	4.39025	4.39025	4.39025	ENST00000412357.1	1	-	175172363	175173985	1622	2	ENSG00000230687.1	Intergenic	ENSEMBL
p554	4.87371e-09	5.05496e-05	1	4.39025	4.39025	4.39025	4.39025	4.39025	4.39025	ENST00000426575.1	1	-	175873897	175889649	15752	3	ENSG00000227740.1	Intergenic	ENSEMBL
p556	0.636311	3.1365e-05	1	4.39025	4.39025	4.39025	4.39025	4.39025	4.39025	ENST00000458070.1	1	-	177362814	177566844	204030	4	ENSG00000227579.1	Intergenic	ENSEMBL
p56	1.11496e-10	1.47366e-07	0.945389	167.534	6.67675	54.8942	166.098	11.7495	38.7451	ENST00000442889.1	1	-	6843951	6844903	952	3	ENSG00000237436.1	Divergent	ENSEMBL
p560	1.18465e-10	0.40727	1	4.39025	4.39025	4.39025	4.39025	4.39025	4.39025	ENST00000445098.2	1	-	178465030	178468769	3739	4	ENSG00000188585.6	Intergenic	ENSEMBL
p561	1.04076e-10	3.30108e-06	1	4.39025	4.39025	4.39025	4.39025	4.39025	4.39025	ENST00000569644.1	1	-	179512335	179518057	5722	2	ENSG00000261250.1	Intronic	ENSEMBL
p562	0.127557	4.06944e-05	0.635168	74.3724	84.4512	59.7211	9.58542	75.0691	54.1582	ENST00000442108.1	1	-	179798743	179805259	6516	2	ENSG00000231966.1	Intergenic	ENSEMBL
p564	1.39938e-08	1.15269e-13	1	4.39025	4.39025	4.39025	4.39025	4.39025	4.39025	ENST00000567904.1	1	-	179922318	179923575	1257	1	ENSG00000260360.1	Divergent	ENSEMBL
p566	5.71504e-08	5.19148e-09	2.27314	393.556	425.116	95.5649	609.658	704.015	764.514	ENST00000415414.1	1	-	180238787	180243816	5029	5	ENSG00000230124.2	Antisense	ENSEMBL
p569	1.57433e-10	5.12899e-07	1	4.39025	4.39025	4.39025	4.39025	4.39025	4.39025	ENST00000415647.1	1	-	180918834	180924023	5189	2	ENSG00000232586.1	Intergenic	ENSEMBL
p583	8.57649e-10	1.456e-15	1	4.39025	4.39025	4.39025	4.39025	4.39025	4.39025	ENST00000565520.1	1	-	185300388	185304171	3783	4	ENSG00000261024.1	Intergenic	ENSEMBL
p591	1.88544e-14	1.72403e-09	0.420219	51.3914	1.05964	98.6213	14.4389	5.92919	43.1155	ENST00000422250.1	1	-	197407105	197416599	9494	4	ENSG00000230260.1	Antisense	ENSEMBL
p593	0.000887744	0.0937072	1	4.39025	4.39025	4.39025	4.39025	4.39025	4.39025	ENST00000566394.1	1	-	198626681	198636190	9509	3	ENSG00000261573.1	Intronic	ENSEMBL
p596	0.00167322	1.67617e-09	1	4.39025	4.39025	4.39025	4.39025	4.39025	4.39025	ENST00000436880.2	1	-	198867594	198906558	38964	2	ENSG00000229989.3	Intergenic	ENSEMBL
p598	1.06492e-10	1.38761e-08	1	4.39025	4.39025	4.39025	4.39025	4.39025	4.39025	ENST00000453155.1	1	-	201191240	201192251	1011	2	ENSG00000229821.1	Antisense	ENSEMBL
p600	2.75793e-07	4.054e-13	1.50663	84.0444	47.9554	7.26366	67.8987	21.171	120.749	ENST00000449492.1	1	-	201642232	201643272	1040	2	ENSG00000236390.1	Intronic	ENSEMBL
p602	0.766031	1.06843e-08	1	4.39025	4.39025	4.39025	4.39025	4.39025	4.39025	ENST00000429443.1	1	-	201692421	201706634	14213	2	ENSG00000235121.1	Intronic	ENSEMBL
p603	2.06492e-08	0.000478079	0.992947	1077.45	832.817	835.552	202.604	808.842	1715.01	ENST00000421449.1	1	-	201785981	201798346	12365	3	ENSG00000231871.1	Antisense	ENSEMBL
p605	0.0020785	0.0803577	1	4.39025	4.39025	4.39025	4.39025	4.39025	4.39025	ENST00000564127.1	1	-	202779365	202779957	592	1	ENSG00000260021.1	Intergenic	ENSEMBL
p608	0.00664162	0.00019265	1	4.39025	4.39025	4.39025	4.39025	4.39025	4.39025	ENST00000425698.1	1	-	203269641	203273676	4035	3	ENSG00000233791.1	Divergent	ENSEMBL
p609	1.66257e-13	1.16405e-14	1.00305	753.457	916.104	925.733	607.914	562.385	1432.91	ENST00000432511.1	1	-	203270293	203274387	4094	3	ENSG00000233791.1	Divergent	ENSEMBL
p61	9.74399e-11	0.000542869	1.40289	228.206	130.766	108.358	24.2125	281.718	349.681	ENST00000602640.1	1	-	7753183	7754904	1721	1	ENSG00000270171.1	Intronic	ENSEMBL
p611	0.065705	7.53024e-10	1	4.39025	4.39025	4.39025	4.39025	4.39025	4.39025	ENST00000425896.1	1	-	206214525	206223548	9023	3	ENSG00000226780.1	Divergent	ENSEMBL
p615	7.5139e-06	2.46281e-12	0.984378	7462.23	2307.31	2286.34	3614.05	1122.58	7130.91	ENST00000597497.1	1	-	207726067	207779900	53833	4	ENSG00000236911.2	Antisense	ENSEMBL
p619	5.77906e-11	1.80951e-08	1	4.39025	4.39025	4.39025	4.39025	4.39025	4.39025	ENST00000567538.1	1	-	208800085	208801430	1345	2	ENSG00000259815.1	Intergenic	ENSEMBL
p62	9.63841e-11	0.000102322	1	4.39025	4.39025	4.39025	4.39025	4.39025	4.39025	ENST00000602973.1	1	-	7758362	7758932	570	1	ENSG00000270035.1	Intronic	ENSEMBL
p620	9.66391e-11	0.00278667	0.743748	40.1833	54.172	94.3157	96.0802	18.3065	25.9369	ENST00000424696.2	1	-	209701799	209741018	39219	7	ENSG00000224260.2	Intergenic	ENSEMBL
p621	0.027838	1.58847e-10	1	4.39025	4.39025	4.39025	4.39025	4.39025	4.39025	ENST00000453331.1	1	-	209701885	209720925	19040	6	ENSG00000224260.2	Intergenic	ENSEMBL
p622	1.78549e-05	0.0027879	1.31966	412.244	424.045	483.971	480.33	711.438	550.529	ENST00000438597.1	1	-	211305929	211306716	787	2	ENSG00000234233.1	Intronic	ENSEMBL
p625	1.08573e-05	0.969108	1	4.39025	4.39025	4.39025	4.39025	4.39025	4.39025	ENST00000458662.1	1	-	211889269	211898744	9475	2	ENSG00000226868.1	Intergenic	ENSEMBL
p626	5.16107e-07	2.26862e-06	1.58228	117.826	192.993	65.5826	159.052	42.8956	393.624	ENST00000442146.1	1	-	212472836	212505055	32219	2	ENSG00000234915.1	Antisense	ENSEMBL
p628	1.28624e-10	0.000292558	1	4.39025	4.39025	4.39025	4.39025	4.39025	4.39025	ENST00000427949.1	1	-	212797625	212800113	2488	2	ENSG00000235862.2	Antisense	ENSEMBL
p629	8.21137e-06	0.478357	1	4.39025	4.39025	4.39025	4.39025	4.39025	4.39025	ENST00000446962.1	1	-	212827340	212838776	11436	3	ENSG00000237980.1	Intergenic	ENSEMBL
p630	2.69803e-07	0.013567	1	4.39025	4.39025	4.39025	4.39025	4.39025	4.39025	ENST00000356684.3	1	-	213025449	213031430	5981	2	ENSG00000198468.3	Divergent	ENSEMBL
p639	0.000918981	4.28123e-09	0.510873	61.7056	56.9962	63.7082	5.85533	56.5382	30.7949	ENST00000598091.1	1	-	214139474	214160973	21499	5	ENSG00000230461.3	Divergent	ENSEMBL
p640	1.03063e-10	0.488087	0.768455	61.6093	93.4118	85.3803	77.1144	29.1027	78.5206	ENST00000443622.1	1	-	214517514	214530958	13444	3	ENSG00000228470.1	Antisense	ENSEMBL
p646	7.84726e-06	0.000380886	1.20272	317.488	154.039	385.973	171.936	441.594	417.8	ENST00000441790.1	1	-	219583022	219585283	2261	2	ENSG00000228536.1	Intergenic	ENSEMBL
p66	4.23665e-09	0.0560665	1	4.39025	4.39025	4.39025	4.39025	4.39025	4.39025	ENST00000414948.1	1	-	8935846	8938066	2220	2	ENSG00000236269.1	Intronic	ENSEMBL
p660	4.25005e-08	4.96715e-05	1	4.39025	4.39025	4.39025	4.39025	4.39025	4.39025	ENST00000453760.1	1	-	224396448	224398114	1666	2	ENSG00000232628.1	Intergenic	ENSEMBL
p661	9.62446e-11	9.44336e-12	2.29333	222.371	158.358	11.9582	290.001	224.701	385.861	ENST00000436706.1	1	-	224396448	224400981	4533	2	ENSG00000232628.1	Intergenic	ENSEMBL
p667	9.97317e-05	1.54499e-05	1	4.39025	4.39025	4.39025	4.39025	4.39025	4.39025	ENST00000424332.1	1	-	226028583	226034223	5640	2	ENSG00000242861.1	Antisense	ENSEMBL
p669	0.0265631	3.07556e-05	1	4.39025	4.39025	4.39025	4.39025	4.39025	4.39025	ENST00000443422.1	1	-	226844340	226847371	3031	2	ENSG00000228382.1	Intronic	ENSEMBL
p670	0.0408084	2.50173e-08	1	4.39025	4.39025	4.39025	4.39025	4.39025	4.39025	ENST00000412918.1	1	-	226844380	226862768	18388	2	ENSG00000228382.1	Intronic	ENSEMBL
p674	2.18522e-09	7.87225e-06	1.01793	61.825	71.7149	13.9204	25.2262	73.3596	51.5182	ENST00000602778.1	1	-	228483611	228490699	7088	2	ENSG00000270110.1	Intronic	ENSEMBL
p676	8.55197e-10	4.01272e-12	1.35468	168.118	105.012	93.94	146.662	95.887	254.713	ENST00000433734.1	1	-	229228561	229230652	2091	2	ENSG00000236975.1	Intergenic	ENSEMBL
p688	0.00505306	2.45449e-07	1	4.39025	4.39025	4.39025	4.39025	4.39025	4.39025	ENST00000425412.1	1	-	231662851	231664247	1396	2	ENSG00000233461.1	Divergent	ENSEMBL
p69	3.80989e-09	0.00449505	1	4.39025	4.39025	4.39025	4.39025	4.39025	4.39025	ENST00000415330.2	1	-	9732483	9747613	15130	3	ENSG00000231789.2	Intronic	ENSEMBL
p695	0.039196	1.93496e-15	1	4.39025	4.39025	4.39025	4.39025	4.39025	4.39025	ENST00000451795.1	1	-	234508552	234509339	787	2	ENSG00000231663.1	Antisense	ENSEMBL
p699	0.398895	0.000290391	1	4.39025	4.39025	4.39025	4.39025	4.39025	4.39025	ENST00000418557.1	1	-	235093088	235099746	6658	4	ENSG00000238005.1	Intergenic	ENSEMBL
p7	1.03222e-08	2.34184e-12	1	4.39025	4.39025	4.39025	4.39025	4.39025	4.39025	ENST00000450983.1	1	-	453632	460480	6848	2	ENSG00000236601.1	Intergenic	ENSEMBL
p700	0.860605	1.65817e-15	1.24352	1176.93	885.455	1199.35	362.277	1208.07	2485.67	ENST00000423175.1	1	-	235095409	235098935	3526	3	ENSG00000238005.1	Intergenic	ENSEMBL
p702	0.693677	2.24743e-05	1	4.39025	4.39025	4.39025	4.39025	4.39025	4.39025	ENST00000549744.1	1	-	235115393	235116551	1158	2	ENSG00000258082.1	Intergenic	ENSEMBL
p707	9.62722e-11	0.000942932	1	4.39025	4.39025	4.39025	4.39025	4.39025	4.39025	ENST00000487567.1	1	-	236686368	236687808	1440	1	ENSG00000223776.4	Intronic	ENSEMBL
p71	8.43949e-10	0.529575	3.10185	40.7888	32.0152	38.8636	256.631	64.7278	25.018	ENST00000438401.1	1	-	12882548	12883022	474	2	ENSG00000228338.1	Intergenic	ENSEMBL
p711	0.618823	0.000892622	0.702499	205.866	261.212	111.31	132.478	78.8643	194.975	ENST00000561926.1	1	-	239411107	239414118	3011	1	ENSG00000259776.1	Intergenic	ENSEMBL
p714	0.000620297	0.000805064	1	4.39025	4.39025	4.39025	4.39025	4.39025	4.39025	ENST00000427859.1	1	-	239867191	239882366	15175	5	ENSG00000233355.2	Intronic	ENSEMBL
p715	0.179419	0.00265987	1.46726	2872.83	545.897	3777.26	3103.36	4167.82	3287.18	ENST00000428176.1	1	-	239869621	239870822	1201	2	ENSG00000233355.2	Intronic	ENSEMBL
p717	0.00156644	7.08248e-05	0.948663	409.714	40.6767	487.158	214.456	69.5956	605.366	ENST00000458325.1	1	-	239870423	239882419	11996	3	ENSG00000233355.2	Intronic	ENSEMBL
p718	0.00422912	4.79411e-06	1	4.39025	4.39025	4.39025	4.39025	4.39025	4.39025	ENST00000593855.1	1	-	239870650	239893765	23115	4	ENSG00000233355.2	Intronic	ENSEMBL
p72	9.70236e-11	0.0153506	0.396046	632.259	986.07	827.69	158.756	572.8	237.179	ENST00000441809.2	1	-	13983805	13986405	2600	2	ENSG00000237445.2	Intergenic	ENSEMBL
p721	2.08436e-07	3.06455e-17	1.43521	287.952	246.375	342.597	393.093	458.596	406.885	ENST00000412311.1	1	-	240341138	240342944	1806	3	ENSG00000233735.1	Antisense	ENSEMBL
p723	1.0875e-06	0.149589	1	4.39025	4.39025	4.39025	4.39025	4.39025	4.39025	ENST00000455599.1	1	-	240563970	240564423	453	2	ENSG00000233519.1	Intronic	ENSEMBL
p726	4.41837e-09	0.11142	1	4.39025	4.39025	4.39025	4.39025	4.39025	4.39025	ENST00000425514.1	1	-	242366856	242373825	6969	3	ENSG00000232689.1	Intronic	ENSEMBL
p733	5.00407e-05	3.83511e-11	1	4.39025	4.39025	4.39025	4.39025	4.39025	4.39025	ENST00000415989.1	1	-	243254692	243255892	1200	2	ENSG00000214837.4	Intergenic	ENSEMBL
p734	0.000770114	1.7986e-09	1.0531	4601.68	4426.97	3273.3	4953.38	122.677	7879.09	ENST00000431528.1	1	-	243254767	243255860	1093	3	ENSG00000214837.4	Intergenic	ENSEMBL
p738	4.16321e-10	3.12783e-09	1	4.39025	4.39025	4.39025	4.39025	4.39025	4.39025	ENST00000417120.1	1	-	243956506	243957702	1196	2	ENSG00000228939.1	Intronic	ENSEMBL
p739	0.214171	0.00167112	1	4.39025	4.39025	4.39025	4.39025	4.39025	4.39025	ENST00000441338.1	1	-	244232121	244256328	24207	5	ENSG00000229960.1	Intergenic	ENSEMBL
p741	2.58078e-06	0.000934471	1	4.39025	4.39025	4.39025	4.39025	4.39025	4.39025	ENST00000366527.3	1	-	245003939	245010205	6266	2	ENSG00000188206.5	Antisense	ENSEMBL
p742	0.035765	0.119482	1	4.39025	4.39025	4.39025	4.39025	4.39025	4.39025	ENST00000475997.1	1	-	245008468	245018799	10331	5	ENSG00000188206.5	Antisense	ENSEMBL
p747	1.17031e-10	4.03943e-05	1.80238	227.769	206.727	262.196	161.031	206.155	888.52	ENST00000426929.1	1	-	246484964	246485740	776	2	ENSG00000230184.1	Intronic	ENSEMBL
p752	2.61079e-06	5.52616e-09	0.827836	126.424	87.7665	143.114	48.3322	113.391	134.066	ENST00000446347.1	1	-	247729209	247803505	74296	3	ENSG00000236817.1	Antisense	ENSEMBL
p753	0.0916406	0.000170565	1	4.39025	4.39025	4.39025	4.39025	4.39025	4.39025	ENST00000419891.1	1	-	247875114	247887066	11952	3	ENSG00000239395.1	Antisense	ENSEMBL
p758	0.00114174	0.000312823	1	4.39025	4.39025	4.39025	4.39025	4.39025	4.39025	ENST00000455464.2	1	+	322077	342806	20729	3	ENSG00000237094.5	Intergenic	ENSEMBL
p759	0.0115149	0.000170616	1.24411	8483.09	1731.29	4331.55	1750.31	2770.79	13575.7	ENST00000419160.3	1	+	322671	324955	2284	2	ENSG00000237094.5	Intergenic	ENSEMBL
p76	0.0170897	4.37635e-06	0.623253	78.0669	88.7082	92.4087	7.46175	92.133	61.9424	ENST00000310916.3	1	-	15442448	15478960	36512	6	ENSG00000175147.7	Antisense	ENSEMBL
p763	8.14591e-09	0.00257889	1.9457	1139.79	1050.34	415.056	1416.18	1140.85	2511.88	ENST00000589899.1	1	+	714309	720035	5726	4	ENSG00000237491.3	Intergenic	ENSEMBL
p764	1.19423e-10	4.58141e-07	1	4.39025	4.39025	4.39025	4.39025	4.39025	4.39025	ENST00000429505.1	1	+	714435	740255	25820	3	ENSG00000237491.3	Intergenic	ENSEMBL
p766	9.62536e-11	4.51106e-05	1	4.39025	4.39025	4.39025	4.39025	4.39025	4.39025	ENST00000585768.1	1	+	719749	737256	17507	2	ENSG00000237491.3	Intergenic	ENSEMBL
p767	9.74165e-11	7.41145e-07	1	4.39025	4.39025	4.39025	4.39025	4.39025	4.39025	ENST00000590848.1	1	+	719749	740212	20463	5	ENSG00000237491.3	Intergenic	ENSEMBL
p769	2.03775e-08	6.2753e-05	1.22992	706.766	168.136	772.485	159.989	595.622	1270.54	ENST00000586288.1	1	+	719775	742701	22926	7	ENSG00000237491.3	Intergenic	ENSEMBL
p774	0.356954	0.00118438	1.35649	117.682	35.2441	54.3162	129.419	85.9089	65.7953	ENST00000445118.2	1	+	762987	794826	31839	5	ENSG00000228794.3	Intergenic	ENSEMBL
p775	1.12493e-07	1.03257e-05	1	4.39025	4.39025	4.39025	4.39025	4.39025	4.39025	ENST00000441765.1	1	+	763046	777118	14072	3	ENSG00000228794.3	Intergenic	ENSEMBL
p776	0.000812192	0.000546157	1	4.39025	4.39025	4.39025	4.39025	4.39025	4.39025	ENST00000415295.1	1	+	766984	777400	10416	2	ENSG00000228794.3	Intergenic	ENSEMBL
p777	1.09738e-10	3.51157e-09	1	4.39025	4.39025	4.39025	4.39025	4.39025	4.39025	ENST00000425657.1	1	+	786727	788132	1405	2	ENSG00000228794.3	Intergenic	ENSEMBL
p779	0.0200514	0.000237079	1	4.39025	4.39025	4.39025	4.39025	4.39025	4.39025	ENST00000398216.2	1	+	849550	850351	801	2	ENSG00000241180.1	Intergenic	ENSEMBL
p780	3.25221e-09	0.000303672	1	4.39025	4.39025	4.39025	4.39025	4.39025	4.39025	ENST00000416774.1	1	+	1072396	1079436	7040	3	ENSG00000223823.1	Intergenic	ENSEMBL
p781	0.00115215	1.17327e-12	1	4.39025	4.39025	4.39025	4.39025	4.39025	4.39025	ENST00000434139.1	1	+	1210602	1215800	5198	3	ENSG00000230415.1	Divergent	ENSEMBL
p783	4.2038e-05	1.4009e-16	1.80651	1004.91	776.303	221.048	788.767	866.387	1961.94	ENST00000428932.1	1	+	1355624	1358071	2447	2	ENSG00000225905.1	Antisense	ENSEMBL
p787	0.000812448	0.00467865	1	4.39025	4.39025	4.39025	4.39025	4.39025	4.39025	ENST00000456687.2	1	+	2497848	2508811	10963	4	ENSG00000225931.2	Intergenic	ENSEMBL
p788	0.577821	0.0294315	1	4.39025	4.39025	4.39025	4.39025	4.39025	4.39025	ENST00000424215.1	1	+	2512998	2515972	2974	3	ENSG00000228037.1	Intergenic	ENSEMBL
p789	0.00407988	1.35715e-13	1	4.39025	4.39025	4.39025	4.39025	4.39025	4.39025	ENST00000427302.1	1	+	2564006	2568059	4053	2	ENSG00000237058.1	Antisense	ENSEMBL
p790	0.0139209	0.000628945	1.73791	195.772	167.995	7.62037	156.125	216.492	272.823	ENST00000413332.1	1	+	3816935	3822096	5161	3	ENSG00000236423.1	Divergent	ENSEMBL
p795	3.71062e-05	0.0306299	0.944586	60.7889	30.6692	93.3048	46.7621	82.8004	44.9621	ENST00000423197.1	1	+	4472110	4484747	12637	6	ENSG00000235054.1	Intergenic	ENSEMBL
p796	0.00710768	2.30415e-05	1	4.39025	4.39025	4.39025	4.39025	4.39025	4.39025	ENST00000420522.1	1	+	4631607	4643481	11874	5	ENSG00000232596.1	Intergenic	ENSEMBL
p800	0.000172983	0.316757	1	4.39025	4.39025	4.39025	4.39025	4.39025	4.39025	ENST00000427317.1	1	+	7429002	7430331	1329	2	ENSG00000237402.1	Intronic	ENSEMBL
p801	4.52696e-05	4.29877e-10	1	4.39025	4.39025	4.39025	4.39025	4.39025	4.39025	ENST00000602406.1	1	+	7836442	7836835	393	1	ENSG00000269925.1	Intronic	ENSEMBL
p809	0.00191861	5.23079e-14	0.664527	1167.27	229.98	890.616	304.734	112.722	1102.89	ENST00000454104.1	1	+	9908375	9910212	1837	3	ENSG00000223989.1	Antisense	ENSEMBL
p812	0.00151323	0.00632411	1	4.39025	4.39025	4.39025	4.39025	4.39025	4.39025	ENST00000452378.1	1	+	11128527	11133154	4627	2	ENSG00000226849.1	Antisense	ENSEMBL
p813	0.00100937	2.42552e-08	1	4.39025	4.39025	4.39025	4.39025	4.39025	4.39025	ENST00000447600.1	1	+	11159731	11162108	2377	2	ENSG00000230337.1	Antisense	ENSEMBL
p816	1.20584e-08	2.27944e-13	1	4.39025	4.39025	4.39025	4.39025	4.39025	4.39025	ENST00000446542.1	1	+	11901073	11907741	6668	4	ENSG00000242349.1	Antisense	ENSEMBL
p817	0.0577821	0.00333332	1	4.39025	4.39025	4.39025	4.39025	4.39025	4.39025	ENST00000400892.2	1	+	11903917	11908136	4219	3	ENSG00000242349.1	Antisense	ENSEMBL
p818	5.53079e-09	1.57182e-05	1	4.39025	4.39025	4.39025	4.39025	4.39025	4.39025	ENST00000416696.1	1	+	12587765	12588462	697	2	ENSG00000229484.1	Intergenic	ENSEMBL
p82	2.17979e-05	0.000310666	1	4.39025	4.39025	4.39025	4.39025	4.39025	4.39025	ENST00000418525.1	1	-	16066545	16076391	9846	2	ENSG00000224459.1	Antisense	ENSEMBL
p820	5.54424e-06	3.66061e-05	1	4.39025	4.39025	4.39025	4.39025	4.39025	4.39025	ENST00000424774.1	1	+	16481705	16483824	2119	2	ENSG00000227959.1	Antisense	ENSEMBL
p822	0.0174716	4.53736e-10	1	4.39025	4.39025	4.39025	4.39025	4.39025	4.39025	ENST00000457809.1	1	+	16524348	16524852	504	2	ENSG00000234166.1	Antisense	ENSEMBL
p823	1.8306e-07	0.61619	1.67652	295.016	65.6679	275.505	203.382	398.513	464.69	ENST00000457898.1	1	+	16787442	16794976	7534	2	ENSG00000226029.1	Divergent	ENSEMBL
p825	9.76294e-11	3.75767e-07	1	4.39025	4.39025	4.39025	4.39025	4.39025	4.39025	ENST00000452795.2	1	+	16847188	16848291	1103	2	ENSG00000224174.2	Intergenic	ENSEMBL
p826	9.62455e-11	0.000739333	1	4.39025	4.39025	4.39025	4.39025	4.39025	4.39025	ENST00000438002.1	1	+	17197439	17200574	3135	2	ENSG00000228549.1	Intergenic	ENSEMBL
p832	7.48698e-06	0.0018337	1	4.39025	4.39025	4.39025	4.39025	4.39025	4.39025	ENST00000439577.1	1	+	17733255	17733878	623	2	ENSG00000227751.1	Antisense	ENSEMBL
p838	1.19393e-05	1.26312e-07	1	4.39025	4.39025	4.39025	4.39025	4.39025	4.39025	ENST00000435552.1	1	+	20569587	20571148	1561	2	ENSG00000228105.1	Intergenic	ENSEMBL
p847	0.000445914	2.32638e-07	1	4.39025	4.39025	4.39025	4.39025	4.39025	4.39025	ENST00000420503.1	1	+	22352003	22357293	5290	3	ENSG00000218510.3	Intergenic	ENSEMBL
p848	0.0138095	7.11535e-17	0.604722	137.543	3.27765	184.974	79.7334	30.6222	86.659	ENST00000404210.2	1	+	22352026	22357713	5687	4	ENSG00000218510.3	Intergenic	ENSEMBL
p850	2.2319e-05	3.82638e-08	1	4.39025	4.39025	4.39025	4.39025	4.39025	4.39025	ENST00000452322.1	1	+	22354831	22357105	2274	2	ENSG00000218510.3	Intergenic	ENSEMBL
p851	0.000386148	0.00516845	1	4.39025	4.39025	4.39025	4.39025	4.39025	4.39025	ENST00000431803.2	1	+	22385689	22390692	5003	2	ENSG00000230068.2	Intronic	ENSEMBL
p857	0.553018	0.181174	1.04425	202.581	77.8944	218.328	155.827	194.988	170.063	ENST00000455902.1	1	+	25534629	25535360	731	2	ENSG00000231953.1	Intergenic	ENSEMBL
p858	7.87583e-07	0.0158773	1	4.39025	4.39025	4.39025	4.39025	4.39025	4.39025	ENST00000412797.1	1	+	25907968	25916847	8879	2	ENSG00000225643.1	Intergenic	ENSEMBL
p860	2.82431e-05	0.00369222	1	4.39025	4.39025	4.39025	4.39025	4.39025	4.39025	ENST00000448791.1	1	+	27202623	27204736	2113	2	ENSG00000226698.1	Intergenic	ENSEMBL
p862	2.66117e-14	2.57121e-11	1	4.39025	4.39025	4.39025	4.39025	4.39025	4.39025	ENST00000443579.1	1	+	27852315	27857072	4757	2	ENSG00000237429.1	Intergenic	ENSEMBL
p864	1.21517e-06	3.81477e-17	1.06942	394.427	268.98	203.73	181.594	75.2329	670.507	ENST00000602607.1	1	+	28100368	28100552	184	1	ENSG00000269971.1	Intronic	ENSEMBL
p865	1.06492e-10	1.17567e-07	1	4.39025	4.39025	4.39025	4.39025	4.39025	4.39025	ENST00000602843.1	1	+	28146493	28146852	359	1	ENSG00000270031.1	Intronic	ENSEMBL
p874	1.41842e-09	4.34784e-05	1	4.39025	4.39025	4.39025	4.39025	4.39025	4.39025	ENST00000441046.1	1	+	30613109	30614454	1345	2	ENSG00000233372.1	Intergenic	ENSEMBL
p875	7.89855e-05	3.36087e-07	1	4.39025	4.39025	4.39025	4.39025	4.39025	4.39025	ENST00000420354.1	1	+	30888671	30893955	5284	3	ENSG00000231949.1	Intergenic	ENSEMBL
p876	1.04552e-06	0.000260959	1	4.39025	4.39025	4.39025	4.39025	4.39025	4.39025	ENST00000414763.1	1	+	31191628	31194570	2942	2	ENSG00000186056.4	Antisense	ENSEMBL
p88	0.0271917	3.95169e-08	1	4.39025	4.39025	4.39025	4.39025	4.39025	4.39025	ENST00000420513.1	1	-	16920056	16935145	15089	4	ENSG00000219481.5	Antisense	ENSEMBL
p881	6.10664e-10	5.05999e-08	1	4.39025	4.39025	4.39025	4.39025	4.39025	4.39025	ENST00000412068.1	1	+	31984035	31989846	5811	3	ENSG00000223907.1	Intergenic	ENSEMBL
p887	0.00376667	1.09519e-05	1	4.39025	4.39025	4.39025	4.39025	4.39025	4.39025	ENST00000447478.1	1	+	32398620	32399576	956	2	ENSG00000228634.1	Intronic	ENSEMBL
p888	0.000432709	3.57111e-05	1	4.39025	4.39025	4.39025	4.39025	4.39025	4.39025	ENST00000427524.1	1	+	33452675	33498070	45395	2	ENSG00000236065.2	Antisense	ENSEMBL
p889	1.39679e-08	5.79884e-07	1	4.39025	4.39025	4.39025	4.39025	4.39025	4.39025	ENST00000602618.1	1	+	33726812	33727281	469	1	ENSG00000270115.1	Intronic	ENSEMBL
p890	0.000158339	4.81481e-07	1	4.39025	4.39025	4.39025	4.39025	4.39025	4.39025	ENST00000457957.2	1	+	33772971	33791644	18673	3	ENSG00000225313.2	Antisense	ENSEMBL
p891	0.0174344	0.050901	1	4.39025	4.39025	4.39025	4.39025	4.39025	4.39025	ENST00000432703.1	1	+	33815952	33828846	12894	3	ENSG00000233246.1	Antisense	ENSEMBL
p90	5.83075e-05	0.406998	1.08572	772.691	21.0399	894.099	661.753	618.957	551.795	ENST00000540383.1	1	-	16944750	16957401	12651	7	ENSG00000215908.5	Intergenic	ENSEMBL
p906	0.000437459	0.0735861	1	4.39025	4.39025	4.39025	4.39025	4.39025	4.39025	ENST00000415255.1	1	+	40030831	40038875	8044	4	ENSG00000228060.1	Antisense	ENSEMBL
p91	0.00195351	3.66734e-06	1.13895	729.814	590.06	259.189	269.111	985.675	543.693	ENST00000412962.1	1	-	16944756	16961054	16298	8	ENSG00000215908.5	Intergenic	ENSEMBL
p916	2.54086e-06	5.51825e-10	0.727726	64.3112	6.46313	74.2322	19.1426	28.6816	57.7008	ENST00000440249.1	1	+	42001113	42001539	426	2	ENSG00000230881.1	Intronic	ENSEMBL
p917	1.0052e-10	3.98988e-11	1	4.39025	4.39025	4.39025	4.39025	4.39025	4.39025	ENST00000414339.1	1	+	43144405	43147325	2920	2	ENSG00000234917.1	Divergent	ENSEMBL
p919	0.00288193	0.00244323	1	4.39025	4.39025	4.39025	4.39025	4.39025	4.39025	ENST00000431759.1	1	+	43424719	43449029	24310	4	ENSG00000227533.1	Antisense	ENSEMBL
p925	0.00834574	6.70833e-10	1	4.39025	4.39025	4.39025	4.39025	4.39025	4.39025	ENST00000453688.1	1	+	44516785	44541864	25079	4	ENSG00000230615.1	Intergenic	ENSEMBL
p927	3.14291e-06	0.229398	0.993326	84.4665	88.3967	48.077	51.1072	90.1503	78.208	ENST00000452785.1	1	+	46599042	46604753	5711	3	ENSG00000227857.1	Divergent	ENSEMBL
p928	2.10638e-08	3.28341e-07	1	4.39025	4.39025	4.39025	4.39025	4.39025	4.39025	ENST00000455247.1	1	+	46921494	46948147	26653	2	ENSG00000225667.1	Intergenic	ENSEMBL
p929	8.13715e-07	0.000212363	1	4.39025	4.39025	4.39025	4.39025	4.39025	4.39025	ENST00000602433.1	1	+	47004367	47035927	31560	8	ENSG00000269956.1	Antisense	ENSEMBL
p930	1.23402e-10	5.81829e-06	1.37223	79.56	46.1494	19.7141	92.6261	3.6121	103.316	ENST00000442839.1	1	+	47139707	47157770	18063	3	ENSG00000228237.1	Antisense	ENSEMBL
p935	7.87652e-07	0.331185	1	4.39025	4.39025	4.39025	4.39025	4.39025	4.39025	ENST00000445070.1	1	+	48283737	48285909	2172	2	ENSG00000225028.1	Intronic	ENSEMBL
p937	6.18153e-07	4.25243e-10	1.11456	87.8938	12.7974	98.2801	88.1394	67.3409	66.284	ENST00000439795.1	1	+	48519880	48532873	12993	3	ENSG00000226133.1	Intergenic	ENSEMBL
p942	0.000566008	0.00615388	1.9455	127.155	62.1171	35.8378	86.4323	180.612	170.907	ENST00000422306.1	1	+	51730587	51731705	1118	2	ENSG00000236434.1	Intronic	ENSEMBL
p949	5.20149e-08	0.018032	0.65043	2796.29	4204.03	568.147	2146	430.081	2346.68	ENST00000588291.1	1	+	52259636	52264099	4463	2	ENSG00000266993.1	Antisense	ENSEMBL
p95	7.66203e-10	0.103665	1	4.39025	4.39025	4.39025	4.39025	4.39025	4.39025	ENST00000419667.2	1	-	18493422	18505840	12418	4	ENSG00000230035.2	Intronic	ENSEMBL
p954	2.77e-06	0.460576	1.03062	413.013	643.29	286.359	402.277	407.071	574.42	ENST00000439621.1	1	+	53580247	53584281	4034	2	ENSG00000235563.1	Antisense	ENSEMBL
p96	2.75553e-10	1.66698e-08	1	4.39025	4.39025	4.39025	4.39025	4.39025	4.39025	ENST00000416470.1	1	-	19918295	19923326	5031	2	ENSG00000235185.1	Divergent	ENSEMBL
p967	1.25132e-06	2.07254e-11	0.853248	76.8131	14.6412	81.1094	7.78341	75.4126	64.0436	ENST00000422374.1	1	+	56046709	56200675	153966	3	ENSG00000234810.1	Intergenic	ENSEMBL
p97	0.126292	1.87241e-12	0.827073	97.0894	168.604	187.193	157.66	159.662	57.2478	ENST00000442226.1	1	-	20510734	20512979	2245	2	ENSG00000225986.1	Antisense	ENSEMBL
p976	0.000523575	4.37601e-10	1	4.39025	4.39025	4.39025	4.39025	4.39025	4.39025	ENST00000420811.2	1	+	58326252	58328475	2223	2	ENSG00000226759.2	Intronic	ENSEMBL
p98	0.0661275	5.20088e-12	1	4.39025	4.39025	4.39025	4.39025	4.39025	4.39025	ENST00000444923.1	1	-	20620703	20649680	28977	2	ENSG00000226664.1	Antisense	ENSEMBL
p985	0.0470453	0.0278378	1	4.39025	4.39025	4.39025	4.39025	4.39025	4.39025	ENST00000438195.1	1	+	59486259	59510286	24027	4	ENSG00000230812.1	Intergenic	ENSEMBL
p987	0.895476	2.42534e-08	1	4.39025	4.39025	4.39025	4.39025	4.39025	4.39025	ENST00000424725.1	1	+	60238466	60254520	16054	3	ENSG00000231816.1	Intergenic	ENSEMBL
p991	1.71229e-05	0.487453	1	4.39025	4.39025	4.39025	4.39025	4.39025	4.39025	ENST00000418091.1	1	+	63489877	63491329	1452	2	ENSG00000227485.1	Intergenic	ENSEMBL
p994	8.27721e-05	4.97882e-15	1	4.39025	4.39025	4.39025	4.39025	4.39025	4.39025	ENST00000429871.1	1	+	65952088	65959871	7783	2	ENSG00000237852.1	Intronic	ENSEMBL
p10008	1.62418e-06	1.68187e-07	1	4.39025	4.39025	4.39025	4.39025	4.39025	4.39025	ENST00000437751.1	2	+	132160473	132166622	6149	4	ENSG00000223631.1	Intergenic	ENSEMBL
p10012	0.000438699	0.000800737	1.04085	94.07	78.5222	88.201	36.9936	147.844	86.6102	ENST00000424510.1	2	+	133673129	133689067	15938	2	ENSG00000233729.1	Intronic	ENSEMBL
p10017	4.41805e-06	1.43086e-05	1	4.39025	4.39025	4.39025	4.39025	4.39025	4.39025	ENST00000419808.1	2	+	136742745	136774099	31354	4	ENSG00000231890.2	Antisense	ENSEMBL
p10018	2.69376e-10	2.08851e-09	1	4.39025	4.39025	4.39025	4.39025	4.39025	4.39025	ENST00000444406.1	2	+	136742903	136743706	803	2	ENSG00000231890.2	Antisense	ENSEMBL
p10020	0.000156724	1.63814e-07	1.24012	224.259	149.646	65.2812	42.641	186.119	315.881	ENST00000599018.1	2	+	136751417	136764889	13472	5	ENSG00000231890.2	Intergenic	ENSEMBL
p10028	1.37097e-06	1.00464e-12	1	4.39025	4.39025	4.39025	4.39025	4.39025	4.39025	ENST00000599279.1	2	+	136766612	136774407	7795	3	ENSG00000231890.2	Intergenic	ENSEMBL
p10032	1.16726e-06	2.04295e-11	1	4.39025	4.39025	4.39025	4.39025	4.39025	4.39025	ENST00000412593.1	2	+	139228225	139231502	3277	3	ENSG00000230569.1	Intergenic	ENSEMBL
p10036	2.15269e-06	3.75856e-08	1	4.39025	4.39025	4.39025	4.39025	4.39025	4.39025	ENST00000421326.1	2	+	140227344	140235317	7973	2	ENSG00000229131.1	Intergenic	ENSEMBL
p10042	0.000121882	5.86714e-11	0.803266	137.495	95.5883	197.204	110.392	196.386	38.8568	ENST00000595449.1	2	+	145278172	145279044	872	2	ENSG00000238057.3	Divergent	ENSEMBL
p10061	0.000479244	0.000605385	2.37729	110.339	13.0445	7.09564	11.2549	198.285	100.647	ENST00000420472.1	2	+	145780753	145930242	149489	2	ENSG00000226674.2	Intergenic	ENSEMBL
p10063	7.29297e-05	0.000975248	1	4.39025	4.39025	4.39025	4.39025	4.39025	4.39025	ENST00000596278.1	2	+	145780794	145830713	49919	2	ENSG00000226674.2	Intergenic	ENSEMBL
p10067	9.64276e-11	0.225096	1.85917	1339.17	1294.19	364.608	1348.38	920.681	3304.69	ENST00000450667.1	2	+	147595316	147607878	12562	6	ENSG00000231040.1	Intergenic	ENSEMBL
p10070	8.28495e-10	5.57615e-05	2.86482	326.649	102.458	26.3623	324.252	463.483	517.104	ENST00000437118.1	2	+	151027936	151157594	129658	3	ENSG00000230645.1	Intergenic	ENSEMBL
p10072	1.48521e-09	1.18778e-10	1.30458	321.265	39.2646	492.703	49.4438	472.422	591.242	ENST00000413247.1	2	+	151485410	151491862	6452	5	ENSG00000224048.1	Intergenic	ENSEMBL
p10073	1.13697e-09	2.03042e-15	1.65222	213.075	109.86	61.7525	199.542	83.4472	352.6	ENST00000427615.1	2	+	151485568	151491854	6286	5	ENSG00000224048.1	Intergenic	ENSEMBL
p10074	7.63596e-05	2.46281e-13	1	4.39025	4.39025	4.39025	4.39025	4.39025	4.39025	ENST00000425983.1	2	+	151839019	151859988	20969	4	ENSG00000228064.1	Intergenic	ENSEMBL
p10084	0.892796	9.42786e-06	1	4.39025	4.39025	4.39025	4.39025	4.39025	4.39025	ENST00000436506.1	2	+	162101265	162103965	2700	3	ENSG00000227403.1	Intergenic	ENSEMBL
p10090	9.63408e-11	0.00117892	0.763413	125.02	192.861	61.49	2.41876	97.632	189.566	ENST00000414885.1	2	+	165697258	165705844	8586	2	ENSG00000233255.1	Antisense	ENSEMBL
p10092	2.52893e-05	7.4572e-14	1	4.39025	4.39025	4.39025	4.39025	4.39025	4.39025	ENST00000425688.1	2	+	166651360	166666520	15160	3	ENSG00000235192.1	Divergent	ENSEMBL
p10097	0.000202242	0.00156967	1.18962	76.3429	31.4049	95.0347	97.1883	86.4109	57.6341	ENST00000595268.1	2	+	166872189	166916968	44779	4	ENSG00000236107.3	Antisense	ENSEMBL
p10101	0.0505498	3.81927e-05	1	4.39025	4.39025	4.39025	4.39025	4.39025	4.39025	ENST00000432133.1	2	+	169957252	169957720	468	2	ENSG00000235321.1	Intergenic	ENSEMBL
p10102	0.223215	1.57725e-09	1	4.39025	4.39025	4.39025	4.39025	4.39025	4.39025	ENST00000429172.1	2	+	171627622	171634252	6630	5	ENSG00000239467.1	Intergenic	ENSEMBL
p10108	6.62213e-10	0.283667	1	4.39025	4.39025	4.39025	4.39025	4.39025	4.39025	ENST00000420866.1	2	+	175190754	175195371	4617	3	ENSG00000231453.1	Intergenic	ENSEMBL
p10111	0.0100529	1.50757e-13	1	4.39025	4.39025	4.39025	4.39025	4.39025	4.39025	ENST00000417038.1	2	+	175352130	175353028	898	2	ENSG00000226853.1	Divergent	ENSEMBL
p10115	1.41484e-07	0.9083	0.891862	116.856	77.4329	160.922	59.2442	126.305	131.25	ENST00000449168.1	2	+	176032631	176033250	619	2	ENSG00000229750.1	Antisense	ENSEMBL
p10117	3.62256e-07	2.32771e-05	1	4.39025	4.39025	4.39025	4.39025	4.39025	4.39025	ENST00000438963.1	2	+	176122069	176307696	185627	2	ENSG00000229066.1	Intergenic	ENSEMBL
p10120	1.42358e-10	4.50321e-06	1	4.39025	4.39025	4.39025	4.39025	4.39025	4.39025	ENST00000428541.1	2	+	178129086	178130243	1157	2	ENSG00000222043.2	Antisense	ENSEMBL
p10123	0.0524552	8.26191e-07	1	4.39025	4.39025	4.39025	4.39025	4.39025	4.39025	ENST00000420672.1	2	+	179278665	179295551	16886	3	ENSG00000223960.1	Divergent	ENSEMBL
p10126	8.48729e-05	6.20862e-05	1	4.39025	4.39025	4.39025	4.39025	4.39025	4.39025	ENST00000415236.1	2	+	179278749	179297009	18260	4	ENSG00000223960.1	Antisense	ENSEMBL
p10128	0.725218	3.85807e-11	1.01026	1010.84	1249.38	1473.09	982.27	1404.81	1384.54	ENST00000589434.1	2	+	179387941	179403980	16039	3	ENSG00000237298.2	Antisense	ENSEMBL
p10130	0.205445	0.000232651	1	4.39025	4.39025	4.39025	4.39025	4.39025	4.39025	ENST00000588804.1	2	+	179388018	179403519	15501	5	ENSG00000237298.2	Antisense	ENSEMBL
p10134	2.37961e-09	0.0656025	0.651546	127.758	194.447	175.225	45.2017	25.722	253.175	ENST00000592600.1	2	+	179388018	179449716	61698	2	ENSG00000237298.2	Antisense	ENSEMBL
p10139	0.46669	0.803883	1	4.39025	4.39025	4.39025	4.39025	4.39025	4.39025	ENST00000592182.1	2	+	179392719	179403497	10778	4	ENSG00000237298.2	Antisense	ENSEMBL
p10140	2.80976e-06	0.315311	1.65617	223.839	58.1723	169.104	2.60351	275.103	469.417	ENST00000589842.1	2	+	179393466	179401804	8338	4	ENSG00000237298.2	Antisense	ENSEMBL
p10141	9.69257e-07	1.64424e-06	1	4.39025	4.39025	4.39025	4.39025	4.39025	4.39025	ENST00000588257.1	2	+	179393466	179401854	8388	5	ENSG00000237298.2	Antisense	ENSEMBL
p10142	5.87032e-06	1.84708e-08	1.69049	401.926	88.9957	141.595	50.6321	268.587	750.046	ENST00000591867.1	2	+	179393466	179402185	8719	5	ENSG00000237298.2	Antisense	ENSEMBL
p10144	0.178831	5.91622e-10	1	4.39025	4.39025	4.39025	4.39025	4.39025	4.39025	ENST00000588244.1	2	+	179393466	179403556	10090	6	ENSG00000237298.2	Antisense	ENSEMBL
p10145	0.0451939	9.50364e-13	1.98153	1264.36	80.1968	54.5568	791.435	457.445	1523.51	ENST00000450692.2	2	+	179393466	179403645	10179	4	ENSG00000237298.2	Antisense	ENSEMBL
p10148	4.01912e-06	0.0318519	1.44896	217.201	265.748	205.321	295.999	265.019	436.26	ENST00000586452.1	2	+	179393466	179469529	76063	7	ENSG00000237298.2	Antisense	ENSEMBL
p10149	0.00990722	0.518509	1	4.39025	4.39025	4.39025	4.39025	4.39025	4.39025	ENST00000590807.1	2	+	179393466	179509228	115762	6	ENSG00000237298.2	Antisense	ENSEMBL
p10150	0.0334798	0.00301553	1	4.39025	4.39025	4.39025	4.39025	4.39025	4.39025	ENST00000438095.1	2	+	179404842	179447390	42548	4	ENSG00000237298.2	Antisense	ENSEMBL
p10151	3.44551e-05	0.00594878	0.656993	168.736	99.0062	188.528	59.1544	6.13454	234.478	ENST00000590932.1	2	+	179406473	179462408	55935	2	ENSG00000237298.2	Antisense	ENSEMBL
p10153	2.99879e-09	4.85998e-10	1	4.39025	4.39025	4.39025	4.39025	4.39025	4.39025	ENST00000589907.1	2	+	179449300	179497163	47863	3	ENSG00000237298.2	Antisense	ENSEMBL
p10154	2.13904e-09	0.379344	1.16516	1035.04	1260.2	1332.66	1491.66	375.21	2360.21	ENST00000589234.1	2	+	179455884	179479002	23118	5	ENSG00000237298.2	Antisense	ENSEMBL
p10163	2.70299e-09	2.11051e-06	1.1386	57.9955	9.18212	84.7867	76.862	63.7931	32.372	ENST00000584485.1	2	+	179637673	179639402	1729	2	ENSG00000237298.2	Antisense	ENSEMBL
p10168	0.0208701	9.75258e-08	1	4.39025	4.39025	4.39025	4.39025	4.39025	4.39025	ENST00000435411.1	2	+	181988563	182264286	275723	5	ENSG00000234663.1	Intergenic	ENSEMBL
p10170	1.71109e-10	3.03514e-10	1	4.39025	4.39025	4.39025	4.39025	4.39025	4.39025	ENST00000424655.1	2	+	181988668	182207038	218370	4	ENSG00000234663.1	Intergenic	ENSEMBL
p10173	2.17472e-05	0.000174462	1	4.39025	4.39025	4.39025	4.39025	4.39025	4.39025	ENST00000453517.1	2	+	187867946	188392007	524061	4	ENSG00000224063.1	Antisense	ENSEMBL
p10187	6.14382e-08	6.11143e-08	1	4.39025	4.39025	4.39025	4.39025	4.39025	4.39025	ENST00000594798.1	2	+	192899509	192908909	9400	2	ENSG00000233766.2	Intronic	ENSEMBL
p10197	1.10823e-05	0.767777	1	4.39025	4.39025	4.39025	4.39025	4.39025	4.39025	ENST00000433933.1	2	+	197124837	197128928	4091	2	ENSG00000229056.1	Intronic	ENSEMBL
p10199	0.00155479	1.91811e-07	1	4.39025	4.39025	4.39025	4.39025	4.39025	4.39025	ENST00000442984.1	2	+	198176116	198177464	1348	2	ENSG00000225979.1	Divergent	ENSEMBL
p10204	1.20504e-06	0.305442	1	4.39025	4.39025	4.39025	4.39025	4.39025	4.39025	ENST00000446911.1	2	+	200333608	200334876	1268	2	ENSG00000225953.2	Intronic	ENSEMBL
p10205	0.000164639	3.16702e-08	1.15407	79.8285	0.244213	27.0506	5.12342	72.1697	46.3352	ENST00000416200.1	2	+	200334618	200341658	7040	2	ENSG00000225953.2	Antisense	ENSEMBL
p10207	8.70467e-09	0.00908471	1	4.39025	4.39025	4.39025	4.39025	4.39025	4.39025	ENST00000419243.1	2	+	200472790	200495438	22648	5	ENSG00000238217.1	Intergenic	ENSEMBL
p10210	6.94374e-08	9.27415e-11	0.806686	281.559	452.174	175.152	235.125	346.827	151.233	ENST00000568571.1	2	+	201689395	201692061	2666	1	ENSG00000260006.1	Divergent	ENSEMBL
p10212	0.000597009	0.0156146	1.1576	3846.67	1818.98	2490.43	4262.49	365.324	4813.69	ENST00000332935.6	2	+	201828021	201843705	15684	2	ENSG00000183308.6	Antisense	ENSEMBL
p10216	5.74085e-06	1.35043e-08	2.07548	1044.02	384.263	161.241	988.893	1426.87	883.268	ENST00000422116.1	2	+	206854308	206865582	11274	3	ENSG00000225610.1	Antisense	ENSEMBL
p10218	0.635403	0.826148	0.902822	1249.64	907.92	522.574	805.662	208.949	1405.07	ENST00000435627.1	2	+	206950245	206950880	635	2	ENSG00000227946.1	Antisense	ENSEMBL
p10219	0.175232	0.000369831	0.848705	668.875	175.737	952.639	660.828	20.3273	844.181	ENST00000453039.1	2	+	206980270	206987047	6777	2	ENSG00000231955.1	Divergent	ENSEMBL
p10220	5.63908e-08	0.00148789	1.55259	197.329	38.5434	243.421	292.241	207.672	244.235	ENST00000415029.1	2	+	207504796	207506006	1210	2	ENSG00000231653.1	Intergenic	ENSEMBL
p10223	5.27735e-07	0.00292032	1	4.39025	4.39025	4.39025	4.39025	4.39025	4.39025	ENST00000454444.1	2	+	208091672	208093032	1360	2	ENSG00000225916.1	Intergenic	ENSEMBL
p10224	0.0414613	8.63649e-07	1	4.39025	4.39025	4.39025	4.39025	4.39025	4.39025	ENST00000440326.1	2	+	208104373	208110312	5939	2	ENSG00000229647.1	Intergenic	ENSEMBL
p10226	0.371696	0.730269	1	4.39025	4.39025	4.39025	4.39025	4.39025	4.39025	ENST00000429730.1	2	+	208527098	208531748	4650	2	ENSG00000224137.1	Intergenic	ENSEMBL
p10228	1.9209e-08	0.340202	1.69914	748.533	207.733	843.528	514.117	931.787	1612.2	ENST00000452057.1	2	+	210895456	210929080	33624	4	ENSG00000229127.1	Antisense	ENSEMBL
p10229	1.7938e-10	0.10263	1	4.39025	4.39025	4.39025	4.39025	4.39025	4.39025	ENST00000412065.1	2	+	211036241	211095107	58866	3	ENSG00000231294.1	Antisense	ENSEMBL
p10235	0.871916	0.0335949	1	4.39025	4.39025	4.39025	4.39025	4.39025	4.39025	ENST00000437261.1	2	+	213775726	213784533	8807	3	ENSG00000223373.1	Intergenic	ENSEMBL
p10241	2.21138e-05	0.00137748	1.17915	204.535	273.961	149.183	90.9261	297.198	352.002	ENST00000412951.1	2	+	216300975	216301715	740	2	ENSG00000230695.1	Divergent	ENSEMBL
p10243	1.14252e-08	0.0110056	1.43916	1118.92	208.688	966.674	453.462	862.806	1985.58	ENST00000414756.1	2	+	216341389	216344971	3582	2	ENSG00000228618.1	Intergenic	ENSEMBL
p10245	5.62821e-08	0.0569657	1	4.39025	4.39025	4.39025	4.39025	4.39025	4.39025	ENST00000417485.2	2	+	216410920	216578618	167698	8	ENSG00000237525.2	Intergenic	ENSEMBL
p10254	1.79009e-08	3.56734e-16	0.819387	85.1124	90.7012	50.8112	67.5097	25.0787	93.105	ENST00000451711.1	2	+	217732734	217733879	1145	2	ENSG00000227021.1	Intergenic	ENSEMBL
p10260	1.71153e-08	1.88869e-06	0.723309	94.6844	196.816	91.3015	106.916	55.221	114.747	ENST00000598002.1	2	+	219840954	219841469	515	2	ENSG00000236445.2	Intergenic	ENSEMBL
p10263	0.000347458	8.01082e-09	0.676904	202.652	273.522	151.989	54.7102	138.076	232.42	ENST00000417355.1	2	+	220163723	220168852	5129	3	ENSG00000230432.1	Antisense	ENSEMBL
p10264	9.89882e-11	0.00344912	1	4.39025	4.39025	4.39025	4.39025	4.39025	4.39025	ENST00000420563.1	2	+	220253217	220268355	15138	2	ENSG00000229525.1	Divergent	ENSEMBL
p10265	2.10464e-07	9.41039e-10	0.779684	102.035	104.947	149.58	148.959	29.3424	99.7041	ENST00000597192.1	2	+	220423804	220424348	544	1	ENSG00000269068.1	Antisense	ENSEMBL
p10268	2.37253e-09	0.0117832	1.51525	204.153	72.7874	181.019	199.428	181.161	313.333	ENST00000442416.1	2	+	220594831	220602464	7633	2	ENSG00000235667.1	Intergenic	ENSEMBL
p10269	0.0321287	0.317103	1	4.39025	4.39025	4.39025	4.39025	4.39025	4.39025	ENST00000432993.1	2	+	220970376	221315499	345123	4	ENSG00000239498.1	Intergenic	ENSEMBL
p10277	1.09182e-08	8.09633e-09	1	4.39025	4.39025	4.39025	4.39025	4.39025	4.39025	ENST00000567305.1	2	+	227668751	227669777	1026	1	ENSG00000261379.1	Intergenic	ENSEMBL
p10281	9.64529e-11	3.63093e-10	1	4.39025	4.39025	4.39025	4.39025	4.39025	4.39025	ENST00000600787.1	2	+	231036838	231038277	1439	2	ENSG00000225963.2	Antisense	ENSEMBL
p10284	0.00371747	0.00649536	1.56627	729.777	81.0018	482.197	236.416	487.171	1301.56	ENST00000456542.1	2	+	231067825	231099681	31856	5	ENSG00000243565.1	Antisense	ENSEMBL
p10285	0.0273563	0.000104194	1	4.39025	4.39025	4.39025	4.39025	4.39025	4.39025	ENST00000441657.1	2	+	231068339	231078874	10535	3	ENSG00000243565.1	Antisense	ENSEMBL
p10287	0.036857	0.693535	0.925693	681.441	625.223	354.856	301.18	325.165	911.712	ENST00000455128.1	2	+	231751220	231758789	7569	2	ENSG00000232520.1	Intergenic	ENSEMBL
p10289	0.653315	0.342257	1	4.39025	4.39025	4.39025	4.39025	4.39025	4.39025	ENST00000454890.1	2	+	231773566	231774817	1251	2	ENSG00000230385.1	Antisense	ENSEMBL
p10290	1.0846e-09	0.141666	1.53298	171.166	4.01247	67.1873	91.9914	38.1596	241.39	ENST00000568958.1	2	+	231916754	231917352	598	1	ENSG00000261829.1	Intergenic	ENSEMBL
p10296	0.0144474	0.000241642	0.327879	115.105	732.506	110.245	208.671	3.16696	102.222	ENST00000565664.1	2	+	235131481	235132585	1104	1	ENSG00000261298.1	Intergenic	ENSEMBL
p10308	0.719318	6.765e-07	0.974643	340.833	178.478	324.002	90.9299	382.171	348.828	ENST00000446029.1	2	+	240547391	240552533	5142	2	ENSG00000227459.1	Intergenic	ENSEMBL
p10309	0.00035842	1.99004e-06	1.43762	169.777	11.6402	103.364	30.0453	135.236	244.126	ENST00000567853.1	2	+	240656649	240657232	583	1	ENSG00000259889.1	Intergenic	ENSEMBL
p10312	0.735498	3.21253e-11	1	4.39025	4.39025	4.39025	4.39025	4.39025	4.39025	ENST00000433036.1	2	+	242629828	242633704	3876	2	ENSG00000228989.1	Intergenic	ENSEMBL
p10313	4.50569e-06	0.00247178	1	4.39025	4.39025	4.39025	4.39025	4.39025	4.39025	ENST00000442867.1	2	+	242786531	242787188	657	2	ENSG00000235151.1	Intergenic	ENSEMBL
p10314	1.7983e-08	0.00187337	1	4.39025	4.39025	4.39025	4.39025	4.39025	4.39025	ENST00000430555.1	2	+	242823513	242908591	85078	4	ENSG00000233806.2	Intergenic	ENSEMBL
p10320	1.27141e-09	0.0346072	1	4.39025	4.39025	4.39025	4.39025	4.39025	4.39025	ENST00000416204.1	2	+	242913150	242914050	900	3	ENSG00000233806.2	Intergenic	ENSEMBL
p20741	1.00864e-05	1.54147e-06	0.769584	50.6821	28.4561	81.9541	69.3931	19.126	35.4549	TCONS_00005051	2	-	292147	293374	1227	2	XLOC_001926	Intergenic	HumanLincRNACatalog
p20743	0.0889966	0.438436	1	4.39025	4.39025	4.39025	4.39025	4.39025	4.39025	TCONS_00004095	2	-	697152	714338	17186	2	XLOC_001931	Intergenic	HumanLincRNACatalog
p20745	4.01547e-05	0.0637658	1	4.39025	4.39025	4.39025	4.39025	4.39025	4.39025	TCONS_00005059	2	-	895984	897649	1665	3	XLOC_001937	Intergenic	HumanLincRNACatalog
p20746	0.00532177	0.000123567	1	4.39025	4.39025	4.39025	4.39025	4.39025	4.39025	TCONS_00004098	2	-	2614075	2617131	3056	2	XLOC_001943	Intergenic	HumanLincRNACatalog
p20749	4.79604e-08	1.58843e-11	1.25028	47.0383	2.04606	46.4141	29.8511	63.2028	26.3457	TCONS_00002738	2	-	4007505	4021609	14104	4	XLOC_001954	Intergenic	HumanLincRNACatalog
p20752	2.47113e-06	3.88757e-09	1.81443	99.3808	69.371	94.0683	196.287	183.007	97.5755	TCONS_00004108	2	-	5758526	5831361	72835	7	XLOC_001958	Intergenic	HumanLincRNACatalog
p20758	1.36299e-10	5.40808e-12	1	4.39025	4.39025	4.39025	4.39025	4.39025	4.39025	TCONS_00005068	2	-	5817039	5831306	14267	3	XLOC_001958	Intergenic	HumanLincRNACatalog
p20772	5.50883e-05	3.08026e-06	0.761925	1370.62	1191.36	244.253	424.075	563.429	1150.64	TCONS_00004128	2	-	8200516	8427679	227163	2	XLOC_001974	Intergenic	HumanLincRNACatalog
p20774	1.18603e-12	2.74723e-06	1	4.39025	4.39025	4.39025	4.39025	4.39025	4.39025	TCONS_00005086	2	-	8500096	8502719	2623	2	XLOC_001974	Intergenic	HumanLincRNACatalog
p20778	6.66909e-05	2.34387e-10	1.11924	50.5203	7.0112	95.3075	98.7122	49.8821	22.4698	TCONS_00004148	2	-	12675861	12805597	129736	2	XLOC_001990	Intergenic	HumanLincRNACatalog
p20783	0.967072	3.16806e-06	1	4.39025	4.39025	4.39025	4.39025	4.39025	4.39025	TCONS_00004156	2	-	16636334	16659842	23508	3	XLOC_002002	Intergenic	HumanLincRNACatalog
p20789	0.000543865	0.0248929	2.41794	104.578	7.09322	105.865	198.844	198.204	128.945	TCONS_00004173	2	-	21320550	21322019	1469	2	XLOC_002013	Intergenic	HumanLincRNACatalog
p20793	0.000166231	0.00254271	0.854459	110.99	184.584	132.994	195.306	28.293	142.594	TCONS_00004183	2	-	23957294	23958476	1182	2	XLOC_002024	Intergenic	HumanLincRNACatalog
p20800	8.88284e-09	0.466192	1	4.39025	4.39025	4.39025	4.39025	4.39025	4.39025	TCONS_00005127	2	-	30515649	30523357	7708	3	XLOC_002040	Intergenic	HumanLincRNACatalog
p20803	0.25048	0.525838	1	4.39025	4.39025	4.39025	4.39025	4.39025	4.39025	TCONS_00004196	2	-	31935274	31990384	55110	3	XLOC_002042	Intergenic	HumanLincRNACatalog
p20806	9.48436e-06	0.000415352	1	4.39025	4.39025	4.39025	4.39025	4.39025	4.39025	TCONS_00004205	2	-	36581907	36582636	729	2	XLOC_002048	Divergent	HumanLincRNACatalog
p20807	0.0241507	5.61315e-09	1	4.39025	4.39025	4.39025	4.39025	4.39025	4.39025	TCONS_00004206	2	-	38054229	38056485	2256	2	XLOC_002049	Intergenic	HumanLincRNACatalog
p20808	0.477671	9.46239e-07	0.902197	62.2172	74.6596	26.564	86.0724	36.0839	25.2995	TCONS_00004207	2	-	38095167	38103451	8284	3	XLOC_002049	Intergenic	HumanLincRNACatalog
p20810	4.13808e-06	7.94838e-12	1	4.39025	4.39025	4.39025	4.39025	4.39025	4.39025	TCONS_00004213	2	-	39010341	39012094	1753	2	XLOC_002055	Intergenic	HumanLincRNACatalog
p20814	1.4553e-06	0.000903738	1	4.39025	4.39025	4.39025	4.39025	4.39025	4.39025	TCONS_00004220	2	-	42619551	42640866	21315	2	XLOC_002064	Intergenic	HumanLincRNACatalog
p20817	2.2308e-10	1.63512e-13	1.3962	6499.28	3099.6	887.117	1214	2340.82	11085.8	TCONS_00004223	2	-	43028633	43037770	9137	2	XLOC_002066	Intergenic	HumanLincRNACatalog
p20820	0.00292509	4.62238e-05	1	4.39025	4.39025	4.39025	4.39025	4.39025	4.39025	TCONS_00003262	2	-	43228461	43233380	4919	2	XLOC_002067	Intergenic	HumanLincRNACatalog
p20824	1.00417e-10	0.000100337	2.05546	73.901	46.9545	4.90338	50.2929	81.6861	126.513	TCONS_00004236	2	-	44475175	44476732	1557	2	XLOC_002073	Intergenic	HumanLincRNACatalog
p20827	1.04547e-06	1.58058e-05	1	4.39025	4.39025	4.39025	4.39025	4.39025	4.39025	TCONS_00003270	2	-	45158315	45162578	4263	2	XLOC_002075	Intergenic	HumanLincRNACatalog
p20829	0.0138583	0.514427	1	4.39025	4.39025	4.39025	4.39025	4.39025	4.39025	TCONS_00004238	2	-	45401698	45402931	1233	2	XLOC_002078	Intergenic	HumanLincRNACatalog
p20830	1.37388e-07	4.28587e-06	1	4.39025	4.39025	4.39025	4.39025	4.39025	4.39025	TCONS_00004239	2	-	45528403	45550518	22115	2	XLOC_002078	Intergenic	HumanLincRNACatalog
p20832	0.172071	1.08495e-15	1	4.39025	4.39025	4.39025	4.39025	4.39025	4.39025	TCONS_00004240	2	-	45875881	45877964	2083	2	XLOC_002080	Intergenic	HumanLincRNACatalog
p20833	0.000262361	0.113288	1	4.39025	4.39025	4.39025	4.39025	4.39025	4.39025	TCONS_00004241	2	-	46520808	46523596	2788	2	XLOC_002081	Divergent	HumanLincRNACatalog
p20841	1.48369e-10	0.00055912	1.72067	113.297	29.8696	108.172	104.206	154.664	173.599	TCONS_00003286	2	-	55852072	55858573	6501	2	XLOC_002099	Intergenic	HumanLincRNACatalog
p20843	4.49921e-09	1.01795e-12	1	4.39025	4.39025	4.39025	4.39025	4.39025	4.39025	TCONS_00004261	2	-	57541337	57542640	1303	2	XLOC_002102	Intergenic	HumanLincRNACatalog
p20847	0.0918963	0.117368	1	4.39025	4.39025	4.39025	4.39025	4.39025	4.39025	TCONS_00004269	2	-	61367899	61372076	4177	2	XLOC_002111	Divergent	HumanLincRNACatalog
p20848	2.951e-07	0.86703	1	4.39025	4.39025	4.39025	4.39025	4.39025	4.39025	TCONS_00004271	2	-	61971121	61992046	20925	2	XLOC_002113	Intergenic	HumanLincRNACatalog
p20852	9.67722e-09	4.42613e-08	1	4.39025	4.39025	4.39025	4.39025	4.39025	4.39025	TCONS_00004279	2	-	62838914	62889751	50837	5	XLOC_002117	Intergenic	HumanLincRNACatalog
p20860	2.49514e-05	0.0578487	1	4.39025	4.39025	4.39025	4.39025	4.39025	4.39025	TCONS_00005170	2	-	65681084	65683653	2569	3	XLOC_002134	Intergenic	HumanLincRNACatalog
p20861	2.7627e-09	0.00120018	1	4.39025	4.39025	4.39025	4.39025	4.39025	4.39025	TCONS_00004299	2	-	69135046	69145027	9981	3	XLOC_002148	Intergenic	HumanLincRNACatalog
p20872	1.63875e-06	0.771255	1.25171	225.402	84.2624	220.489	8.24708	298.841	356.509	TCONS_00004317	2	-	79107907	79108749	842	2	XLOC_002177	Intergenic	HumanLincRNACatalog
p20878	1.10077e-09	5.3999e-13	0.80335	63.4684	91.7666	69.2714	13.1734	95.4941	71.6896	TCONS_00004324	2	-	85958822	85967668	8846	2	XLOC_002191	Intergenic	HumanLincRNACatalog
p20883	6.62873e-09	0.111067	1.53476	337.407	105.974	311.084	79.9785	150.853	927.089	TCONS_00005195	2	-	88986734	88989760	3026	3	XLOC_002198	Intergenic	HumanLincRNACatalog
p20887	0.335938	0.00433824	0.789504	210.812	250.205	146.737	129.39	154.683	195.752	TCONS_00004347	2	-	99384248	99388552	4304	4	XLOC_002221	Intergenic	HumanLincRNACatalog
p20888	5.99406e-06	0.860924	1.33312	715.535	226.679	191.467	971.579	121.702	418.056	TCONS_00005211	2	-	99388254	99388552	298	2	XLOC_002221	Intergenic	HumanLincRNACatalog
p20893	1.73885e-07	1.09034e-09	0.976194	76.9688	38.5065	71.9227	33.58	58.1487	91.2081	TCONS_00005220	2	-	105424032	105461633	37601	4	XLOC_002241	Intergenic	HumanLincRNACatalog
p20894	1.14118e-09	1.34272e-08	1.48974	61.9878	48.9569	56.4654	39.0446	78.2237	132.129	TCONS_00004363	2	-	105719307	105720606	1299	2	XLOC_002243	Intergenic	HumanLincRNACatalog
p20897	9.80458e-11	1.66173e-08	1	4.39025	4.39025	4.39025	4.39025	4.39025	4.39025	TCONS_00004365	2	-	105950390	105952068	1678	2	XLOC_002245	Intergenic	HumanLincRNACatalog
p20903	0.0552011	2.07471e-06	1	4.39025	4.39025	4.39025	4.39025	4.39025	4.39025	TCONS_00004371	2	-	108683754	108684693	939	2	XLOC_002256	Intergenic	HumanLincRNACatalog
p20904	9.59148e-05	1.10453e-10	1	4.39025	4.39025	4.39025	4.39025	4.39025	4.39025	TCONS_00004374	2	-	108845323	108848661	3338	2	XLOC_002258	Intergenic	HumanLincRNACatalog
p20908	4.97731e-07	1.52063e-12	0.983305	81.9325	78.8117	42.8501	42.0788	82.364	75.7523	TCONS_00004379	2	-	111099474	111103519	4045	2	XLOC_002264	Intergenic	HumanLincRNACatalog
p20910	0.106793	0.30226	1	4.39025	4.39025	4.39025	4.39025	4.39025	4.39025	TCONS_00005230	2	-	113399509	113403306	3797	3	XLOC_002275	Divergent	HumanLincRNACatalog
p20912	0.386607	0.446427	1.38058	220.993	258.812	2.41323	289.262	208.59	167.887	TCONS_00005231	2	-	113401533	113401955	422	2	XLOC_002275	Intergenic	HumanLincRNACatalog
p20915	6.90831e-10	0.333691	1.72434	410.505	219.495	352.456	774.882	745.814	173.394	TCONS_00003380	2	-	114464369	114467816	3447	2	XLOC_002282	Intergenic	HumanLincRNACatalog
p20917	4.76698e-06	1.78202e-09	1	4.39025	4.39025	4.39025	4.39025	4.39025	4.39025	TCONS_00004414	2	-	114727054	114729927	2873	2	XLOC_002286	Intergenic	HumanLincRNACatalog
p20918	2.70821e-05	2.426e-07	1.17595	61.9762	33.2818	8.24857	30.6201	63.7641	27.3342	TCONS_00004415	2	-	114799665	114800908	1243	2	XLOC_002287	Intergenic	HumanLincRNACatalog
p20930	9.81207e-11	1.3703e-09	1	4.39025	4.39025	4.39025	4.39025	4.39025	4.39025	TCONS_00004437	2	-	128193815	128228064	34249	3	XLOC_002310	Intergenic	HumanLincRNACatalog
p20932	2.39605e-06	5.45542e-12	1	4.39025	4.39025	4.39025	4.39025	4.39025	4.39025	TCONS_00004443	2	-	130324222	130351825	27603	2	XLOC_002317	Intergenic	HumanLincRNACatalog
p20935	8.34518e-07	0.00248245	1.04991	404.858	60.2661	285.589	331.938	260.818	195.428	TCONS_00004445	2	-	132227280	132229929	2649	2	XLOC_002323	Intergenic	HumanLincRNACatalog
p20944	3.13647e-07	1.67048e-10	0.749965	83.4632	28.0103	28.7022	24.724	1.44097	78.962	TCONS_00005257	2	-	157173939	157174852	913	2	XLOC_002366	Intergenic	HumanLincRNACatalog
p20955	0.205788	0.0219577	1	4.39025	4.39025	4.39025	4.39025	4.39025	4.39025	TCONS_00005278	2	-	173188077	173190935	2858	2	XLOC_002392	Intergenic	HumanLincRNACatalog
p20962	0.0133239	0.000574414	1	4.39025	4.39025	4.39025	4.39025	4.39025	4.39025	TCONS_00005286	2	-	183536803	183537875	1072	2	XLOC_002420	Intergenic	HumanLincRNACatalog
p20971	0.701847	0.000776097	1	4.39025	4.39025	4.39025	4.39025	4.39025	4.39025	TCONS_00005309	2	-	200625342	200638457	13115	2	XLOC_002452	Intergenic	HumanLincRNACatalog
p20972	2.78056e-05	0.00209535	1	4.39025	4.39025	4.39025	4.39025	4.39025	4.39025	TCONS_00004545	2	-	200677313	200684474	7161	2	XLOC_002452	Intergenic	HumanLincRNACatalog
p20976	0.00155483	0.685959	1.36682	1289.88	927.705	129.515	256.233	1197.68	1754.16	TCONS_00004561	2	-	206853274	206854321	1047	2	XLOC_002471	Intergenic	HumanLincRNACatalog
p20977	0.784831	7.67928e-05	0.37119	110.556	173.578	54.6018	60.8427	1.41999	63.4729	TCONS_00005329	2	-	208050932	208102779	51847	3	XLOC_002473	Intergenic	HumanLincRNACatalog
p20982	3.38238e-09	2.49164e-12	1	4.39025	4.39025	4.39025	4.39025	4.39025	4.39025	TCONS_00004576	2	-	217726273	217730405	4132	3	XLOC_002486	Intergenic	HumanLincRNACatalog
p20983	7.42183e-09	0.336767	1	4.39025	4.39025	4.39025	4.39025	4.39025	4.39025	TCONS_00004577	2	-	217927046	217931700	4654	3	XLOC_002488	Intergenic	HumanLincRNACatalog
p20984	6.94798e-06	0.0286541	0.262613	92.7272	164.845	119.569	1.31382	31.026	66.7023	TCONS_00004578	2	-	217929530	217931700	2170	2	XLOC_002488	Intergenic	HumanLincRNACatalog
p20987	8.63192e-10	0.00218631	1	4.39025	4.39025	4.39025	4.39025	4.39025	4.39025	TCONS_00004594	2	-	221670538	221677166	6628	2	XLOC_002498	Intergenic	HumanLincRNACatalog
p20994	0.000150425	3.01991e-09	1	4.39025	4.39025	4.39025	4.39025	4.39025	4.39025	TCONS_00002781	2	-	231852213	231860746	8533	5	XLOC_002517	Divergent	HumanLincRNACatalog
p21001	1.15367e-06	1.87984e-05	1	4.39025	4.39025	4.39025	4.39025	4.39025	4.39025	TCONS_00004625	2	-	239841035	239842252	1217	3	XLOC_002539	Intergenic	HumanLincRNACatalog
p21003	1.21104e-10	6.33655e-15	1	4.39025	4.39025	4.39025	4.39025	4.39025	4.39025	TCONS_00004627	2	-	240832072	240834891	2819	2	XLOC_002541	Intergenic	HumanLincRNACatalog
p21007	9.73432e-11	0.000123449	1.13507	221.329	240.651	50.6552	130.385	122.66	328.835	TCONS_00005365	2	-	242486137	242492258	6121	2	XLOC_002552	Intergenic	HumanLincRNACatalog
p21008	0.00285177	1.25877e-11	1.31363	98.6526	66.1743	61.5645	69.2505	169.639	58.5052	TCONS_00004641	2	-	242671428	242673870	2442	2	XLOC_002554	Divergent	HumanLincRNACatalog
p21009	0.246261	5.27875e-07	0.894377	984.049	1324.38	441.209	959.588	352.083	1147.55	TCONS_00004646	2	-	242835751	242843498	7747	3	XLOC_002558	Intergenic	HumanLincRNACatalog
p21016	9.64029e-11	3.64825e-18	1.26081	115.172	167.855	28.4663	145.282	55.1103	192.341	TCONS_00004654	2	+	198353	210331	11978	4	XLOC_001300	Intergenic	HumanLincRNACatalog
p21026	1.37268e-10	4.98721e-06	1	4.39025	4.39025	4.39025	4.39025	4.39025	4.39025	TCONS_00003544	2	+	1753645	1757701	4056	3	XLOC_001317	Intergenic	HumanLincRNACatalog
p21027	1.01885e-08	0.00949123	1	4.39025	4.39025	4.39025	4.39025	4.39025	4.39025	TCONS_00004671	2	+	1754992	1757189	2197	2	XLOC_001317	Intergenic	HumanLincRNACatalog
p21029	0.000668706	0.454163	0.605399	309.362	418.35	459.991	100.436	326.935	291.663	TCONS_00003550	2	+	3606077	3609391	3314	2	XLOC_001323	Divergent	HumanLincRNACatalog
p21035	1.05529e-10	2.70845e-08	1	4.39025	4.39025	4.39025	4.39025	4.39025	4.39025	TCONS_00003554	2	+	6134307	6142071	7764	2	XLOC_001327	Intergenic	HumanLincRNACatalog
p21036	2.21612e-06	4.59517e-05	1	4.39025	4.39025	4.39025	4.39025	4.39025	4.39025	TCONS_00004684	2	+	7213466	7215379	1913	2	XLOC_001329	Intergenic	HumanLincRNACatalog
p21037	0.774761	6.93147e-09	1.38824	288.75	107.375	137.325	121.524	333.873	285.162	TCONS_00004689	2	+	7865832	7870454	4622	2	XLOC_001331	Intergenic	HumanLincRNACatalog
p21038	2.52568e-07	0.000501575	1	4.39025	4.39025	4.39025	4.39025	4.39025	4.39025	TCONS_00004690	2	+	8806772	8810423	3651	2	XLOC_001333	Intergenic	HumanLincRNACatalog
p21039	0.00615972	1.22045e-11	1	4.39025	4.39025	4.39025	4.39025	4.39025	4.39025	TCONS_00003558	2	+	9144181	9148968	4787	3	XLOC_001334	Divergent	HumanLincRNACatalog
p21044	0.042341	0.00152236	1.21417	339.289	431.086	278.852	456.654	492.373	324.911	TCONS_00003568	2	+	10589580	10592413	2833	2	XLOC_001342	Intergenic	HumanLincRNACatalog
p21046	0.045327	1.44737e-06	1	4.39025	4.39025	4.39025	4.39025	4.39025	4.39025	TCONS_00002818	2	+	10702420	10706471	4051	2	XLOC_001343	Intergenic	HumanLincRNACatalog
p21048	9.93565e-05	0.715927	0.862146	65.1478	69.5389	11.3223	54.0052	18.6562	53.2197	TCONS_00003577	2	+	11547408	11561393	13985	3	XLOC_001351	Intergenic	HumanLincRNACatalog
p21051	4.36952e-09	2.39408e-08	1	4.39025	4.39025	4.39025	4.39025	4.39025	4.39025	TCONS_00004702	2	+	13322093	13353685	31592	2	XLOC_001356	Intergenic	HumanLincRNACatalog
p21055	9.67763e-11	4.11221e-14	0.667008	202.38	275.187	235.498	104.381	51.251	319.988	TCONS_00003586	2	+	15922617	15926006	3389	3	XLOC_001363	Intergenic	HumanLincRNACatalog
p21057	1.69615e-05	3.09122e-05	1.01138	115.269	62.139	112.219	159.742	19.9452	113.237	TCONS_00002838	2	+	16704457	16710706	6249	3	XLOC_001369	Intergenic	HumanLincRNACatalog
p21060	0.361246	0.00427881	0.518966	89.2611	77.6843	58.5446	58.4004	0.597699	58.0235	TCONS_00003590	2	+	18825463	19125152	299689	3	XLOC_001374	Intergenic	HumanLincRNACatalog
p21065	9.63743e-11	0.000292924	1.38001	223.534	166.879	136.515	118.981	127.803	480.383	TCONS_00003593	2	+	20082401	20084658	2257	3	XLOC_001379	Intergenic	HumanLincRNACatalog
p21071	1.28492e-10	0.0205906	1	4.39025	4.39025	4.39025	4.39025	4.39025	4.39025	TCONS_00003604	2	+	25224399	25258424	34025	2	XLOC_001398	Intergenic	HumanLincRNACatalog
p21073	0.000448296	0.0267329	1	4.39025	4.39025	4.39025	4.39025	4.39025	4.39025	TCONS_00003611	2	+	27938768	27977766	38998	4	XLOC_001406	Intergenic	HumanLincRNACatalog
p21084	0.253749	0.00244814	1	4.39025	4.39025	4.39025	4.39025	4.39025	4.39025	TCONS_00004742	2	+	31494728	31496423	1695	2	XLOC_001415	Intergenic	HumanLincRNACatalog
p21086	1.23037e-08	1.1701e-06	1	4.39025	4.39025	4.39025	4.39025	4.39025	4.39025	TCONS_00003626	2	+	33050393	33061781	11388	2	XLOC_001418	Intergenic	HumanLincRNACatalog
p21093	0.00126394	2.61978e-09	1	4.39025	4.39025	4.39025	4.39025	4.39025	4.39025	TCONS_00003637	2	+	37716638	37764397	47759	2	XLOC_001429	Intergenic	HumanLincRNACatalog
p21095	2.42581e-10	0.707693	1.3069	109.146	120.626	45.9957	133.091	70.0668	157.243	TCONS_00004750	2	+	38095118	38099030	3912	2	XLOC_001432	Intergenic	HumanLincRNACatalog
p21101	0.131232	0.00679048	0.908164	202.2	250.949	44.2679	21.3174	238.686	191.733	TCONS_00003658	2	+	43055062	43180319	125257	2	XLOC_001446	Intergenic	HumanLincRNACatalog
p21103	9.62253e-11	1.27295e-11	2.04146	6252.12	2218.54	2481.2	519.555	4054.99	17783.3	TCONS_00003661	2	+	43357102	43358647	1545	2	XLOC_001448	Intergenic	HumanLincRNACatalog
p21106	9.34364e-06	0.000367944	1	4.39025	4.39025	4.39025	4.39025	4.39025	4.39025	TCONS_00004770	2	+	45401106	45402546	1440	2	XLOC_001453	Intergenic	HumanLincRNACatalog
p21110	6.60989e-08	0.572508	1	4.39025	4.39025	4.39025	4.39025	4.39025	4.39025	TCONS_00004778	2	+	46656286	46667434	11148	3	XLOC_001455	Intergenic	HumanLincRNACatalog
p21111	2.76579e-05	4.89147e-14	1	4.39025	4.39025	4.39025	4.39025	4.39025	4.39025	TCONS_00004781	2	+	46874504	46877634	3130	2	XLOC_001457	Intergenic	HumanLincRNACatalog
p21112	5.1913e-09	8.17348e-05	1	4.39025	4.39025	4.39025	4.39025	4.39025	4.39025	TCONS_00004782	2	+	46874504	46877634	3130	2	XLOC_001457	Intergenic	HumanLincRNACatalog
p21115	3.34837e-11	0.000118759	1.74901	135.529	91.857	86.1213	156.19	191.78	200.357	TCONS_00003670	2	+	47090677	47102328	11651	2	XLOC_001460	Intergenic	HumanLincRNACatalog
p21122	1.93936e-08	0.00294484	1	4.39025	4.39025	4.39025	4.39025	4.39025	4.39025	TCONS_00003691	2	+	56750279	56816630	66351	3	XLOC_001482	Intergenic	HumanLincRNACatalog
p21125	9.70014e-11	0.663681	1.02642	99.2075	175.586	68.4911	134.154	61.417	156.784	TCONS_00003696	2	+	58503173	58521679	18506	3	XLOC_001485	Intergenic	HumanLincRNACatalog
p21129	0.000112978	5.05981e-06	1	4.39025	4.39025	4.39025	4.39025	4.39025	4.39025	TCONS_00003709	2	+	64501018	64518697	17679	2	XLOC_001496	Intergenic	HumanLincRNACatalog
p21132	4.92102e-10	0.000244384	1	4.39025	4.39025	4.39025	4.39025	4.39025	4.39025	TCONS_00003711	2	+	65158444	65161625	3181	2	XLOC_001499	Intergenic	HumanLincRNACatalog
p21134	9.72638e-11	0.0045782	1	4.39025	4.39025	4.39025	4.39025	4.39025	4.39025	TCONS_00002909	2	+	65677486	65682831	5345	2	XLOC_001501	Intergenic	HumanLincRNACatalog
p21139	6.16847e-08	6.19453e-09	0.967253	85.7979	57.4975	65.4109	36.4414	65.9286	99.5017	TCONS_00002704	2	+	66305393	66311772	6379	3	XLOC_001506	Intergenic	HumanLincRNACatalog
p21148	4.44887e-07	4.1888e-14	0.651418	51.3225	63.8972	11.9066	60.3768	1.05374	21.3818	TCONS_00004811	2	+	67793632	67801094	7462	4	XLOC_001515	Intergenic	HumanLincRNACatalog
p21151	9.62261e-11	0.000873834	1	4.39025	4.39025	4.39025	4.39025	4.39025	4.39025	TCONS_00003731	2	+	71923939	72005321	81382	2	XLOC_001526	Intergenic	HumanLincRNACatalog
p21153	1.32044e-08	0.342404	1	4.39025	4.39025	4.39025	4.39025	4.39025	4.39025	TCONS_00003733	2	+	74375212	74378011	2799	2	XLOC_001532	Divergent	HumanLincRNACatalog
p21155	3.31007e-09	2.01082e-05	0.930451	17743	35065.4	26464.5	38076.1	21731.7	13951.7	TCONS_00002935	2	+	74378364	74381319	2955	2	XLOC_001532	Intergenic	HumanLincRNACatalog
p21156	8.7674e-05	0.000419091	1	4.39025	4.39025	4.39025	4.39025	4.39025	4.39025	TCONS_00003738	2	+	75145003	75170618	25615	4	XLOC_001537	Intergenic	HumanLincRNACatalog
p21160	6.27577e-05	6.84991e-06	1	4.39025	4.39025	4.39025	4.39025	4.39025	4.39025	TCONS_00003746	2	+	78339184	78354877	15693	2	XLOC_001543	Intergenic	HumanLincRNACatalog
p21166	6.21043e-09	0.000917633	1.20051	634.716	815.523	381.513	532.093	395.914	1271.03	TCONS_00003752	2	+	85190234	85194331	4097	2	XLOC_001550	Intergenic	HumanLincRNACatalog
p21167	0.972077	1.07076e-05	1	4.39025	4.39025	4.39025	4.39025	4.39025	4.39025	TCONS_00004835	2	+	85938745	85943145	4400	2	XLOC_001556	Intergenic	HumanLincRNACatalog
p21170	1.11483e-10	5.96239e-09	1	4.39025	4.39025	4.39025	4.39025	4.39025	4.39025	TCONS_00003757	2	+	86116375	86132077	15702	2	XLOC_001558	Divergent	HumanLincRNACatalog
p21172	2.37741e-07	7.68511e-05	1	4.39025	4.39025	4.39025	4.39025	4.39025	4.39025	TCONS_00004837	2	+	86116544	86118325	1781	2	XLOC_001558	Divergent	HumanLincRNACatalog
p21173	1.45317e-09	5.91074e-06	1	4.39025	4.39025	4.39025	4.39025	4.39025	4.39025	TCONS_00004838	2	+	86128681	86132015	3334	2	XLOC_001558	Intergenic	HumanLincRNACatalog
p21175	1.00796e-10	4.23192e-10	1	4.39025	4.39025	4.39025	4.39025	4.39025	4.39025	TCONS_00004841	2	+	89108796	89113264	4468	3	XLOC_001564	Intergenic	HumanLincRNACatalog
p21177	0.000119713	1.32e-06	1.17048	982.278	332.908	899.255	553.186	309.963	1728.81	TCONS_00004852	2	+	96477741	96479705	1964	2	XLOC_001576	Intergenic	HumanLincRNACatalog
p21180	7.27681e-10	0.00952616	1	4.39025	4.39025	4.39025	4.39025	4.39025	4.39025	TCONS_00003794	2	+	101356410	101363828	7418	3	XLOC_001591	Intergenic	HumanLincRNACatalog
p21184	6.95437e-06	0.00926013	1	4.39025	4.39025	4.39025	4.39025	4.39025	4.39025	TCONS_00003801	2	+	102661124	102674449	13325	3	XLOC_001596	Intergenic	HumanLincRNACatalog
p21187	2.68455e-07	1.11867e-12	1	4.39025	4.39025	4.39025	4.39025	4.39025	4.39025	TCONS_00003811	2	+	107159392	107160717	1325	2	XLOC_001613	Intergenic	HumanLincRNACatalog
p21193	0.988623	1.77835e-08	0.952911	99.9333	175.178	56.9108	58.3982	171.143	86.8471	TCONS_00003820	2	+	113436286	113438656	2370	3	XLOC_001628	Intergenic	HumanLincRNACatalog
p21194	2.57068e-09	0.299028	1	4.39025	4.39025	4.39025	4.39025	4.39025	4.39025	TCONS_00003822	2	+	113696551	113698598	2047	2	XLOC_001630	Intergenic	HumanLincRNACatalog
p21198	1.94208e-08	5.71823e-06	1	4.39025	4.39025	4.39025	4.39025	4.39025	4.39025	TCONS_00002982	2	+	114269930	114272888	2958	3	XLOC_001631	Intergenic	HumanLincRNACatalog
p21203	4.2635e-08	0.675418	1	4.39025	4.39025	4.39025	4.39025	4.39025	4.39025	TCONS_00003828	2	+	118802953	118816029	13076	3	XLOC_001637	Intergenic	HumanLincRNACatalog
p21204	2.85255e-10	1.13928e-07	1	4.39025	4.39025	4.39025	4.39025	4.39025	4.39025	TCONS_00003829	2	+	118982819	118983456	637	2	XLOC_001638	Intergenic	HumanLincRNACatalog
p21205	0.00767317	2.15994e-05	1	4.39025	4.39025	4.39025	4.39025	4.39025	4.39025	TCONS_00003831	2	+	121060713	121085650	24937	2	XLOC_001640	Intergenic	HumanLincRNACatalog
p21207	7.84328e-06	0.859123	1	4.39025	4.39025	4.39025	4.39025	4.39025	4.39025	TCONS_00003833	2	+	121334544	121335384	840	2	XLOC_001641	Intergenic	HumanLincRNACatalog
p21213	0.690695	2.13389e-06	0.566563	313.248	220.084	214	39.744	35.0585	348.609	TCONS_00003843	2	+	123223598	123229226	5628	2	XLOC_001649	Intergenic	HumanLincRNACatalog
p21223	1.8142e-10	0.371683	1	4.39025	4.39025	4.39025	4.39025	4.39025	4.39025	TCONS_00002721	2	+	129622178	129626301	4123	3	XLOC_001666	Intergenic	HumanLincRNACatalog
p21228	2.42227e-10	1.02735e-05	1.41045	106.429	189.004	24.4731	106.392	190.572	154.248	TCONS_00004888	2	+	132160477	132167680	7203	4	XLOC_001674	Intergenic	HumanLincRNACatalog
p21229	3.19357e-10	4.08282e-05	2.25006	412.072	345.574	3.15428	588.848	466.551	656.448	TCONS_00004889	2	+	132301071	132302891	1820	2	XLOC_001676	Intergenic	HumanLincRNACatalog
p21231	9.62228e-11	0.00192183	1	4.39025	4.39025	4.39025	4.39025	4.39025	4.39025	TCONS_00004897	2	+	132795680	132796357	677	2	XLOC_001679	Intergenic	HumanLincRNACatalog
p21233	1.19382e-06	5.50629e-11	1	4.39025	4.39025	4.39025	4.39025	4.39025	4.39025	TCONS_00003879	2	+	133094896	133096192	1296	2	XLOC_001680	Intergenic	HumanLincRNACatalog
p21234	0.0607511	0.00212314	0.954652	94.4462	194.648	47.9891	128.183	128.024	65.5905	TCONS_00003883	2	+	136846225	136869280	23055	2	XLOC_001684	Intergenic	HumanLincRNACatalog
p21239	2.47529e-07	0.00314169	1.4708	3002.63	3248.28	1482.97	3985.85	1192.89	6196.22	TCONS_00004912	2	+	150143481	150146685	3204	3	XLOC_001701	Intergenic	HumanLincRNACatalog
p21251	7.61827e-07	1.91186e-05	1	4.39025	4.39025	4.39025	4.39025	4.39025	4.39025	TCONS_00003921	2	+	160761404	160763529	2125	2	XLOC_001726	Divergent	HumanLincRNACatalog
p21265	4.70841e-09	0.11196	1	4.39025	4.39025	4.39025	4.39025	4.39025	4.39025	TCONS_00003937	2	+	172345083	172347291	2208	2	XLOC_001752	Intergenic	HumanLincRNACatalog
p21273	4.12528e-09	0.850774	1	4.39025	4.39025	4.39025	4.39025	4.39025	4.39025	TCONS_00003951	2	+	177714313	177722672	8359	4	XLOC_001768	Intergenic	HumanLincRNACatalog
p21277	9.62263e-11	1.92662e-08	1	4.39025	4.39025	4.39025	4.39025	4.39025	4.39025	TCONS_00004960	2	+	181940168	181941195	1027	2	XLOC_001775	Intergenic	HumanLincRNACatalog
p21287	0.00024699	0.968408	0.762654	117.449	123.383	138.917	55.0931	104.236	130.289	TCONS_00004969	2	+	192479790	192502235	22445	3	XLOC_001787	Intergenic	HumanLincRNACatalog
p21294	9.83439e-11	9.88161e-08	1	4.39025	4.39025	4.39025	4.39025	4.39025	4.39025	TCONS_00003998	2	+	207744135	207799719	55584	4	XLOC_001823	Intergenic	HumanLincRNACatalog
p21298	0.000385285	4.03713e-13	1	4.39025	4.39025	4.39025	4.39025	4.39025	4.39025	TCONS_00004000	2	+	207790672	207798146	7474	3	XLOC_001823	Intergenic	HumanLincRNACatalog
p21305	0.0666911	0.0327555	0.585146	81.8677	93.7907	93.8929	50.8627	45.8088	61.0555	TCONS_00004010	2	+	215674994	215698897	23903	2	XLOC_001836	Divergent	HumanLincRNACatalog
p21307	1.73114e-10	0.653536	1.11576	45.1369	10.7947	18.3999	17.0277	18.1054	47.8033	TCONS_00004013	2	+	216341369	216351340	9971	2	XLOC_001847	Intergenic	HumanLincRNACatalog
p21308	1.32467e-06	0.000259727	1	4.39025	4.39025	4.39025	4.39025	4.39025	4.39025	TCONS_00003100	2	+	216395169	216410249	15080	5	XLOC_001848	Intergenic	HumanLincRNACatalog
p21314	0.0378287	0.115143	1	4.39025	4.39025	4.39025	4.39025	4.39025	4.39025	TCONS_00004018	2	+	217384917	217394310	9393	2	XLOC_001856	Intergenic	HumanLincRNACatalog
p21317	1.58282e-09	1.2593e-11	1.05387	87.667	79.17	56.3264	64.7064	88.5144	81.9634	TCONS_00004023	2	+	217664301	217668255	3954	2	XLOC_001861	Intergenic	HumanLincRNACatalog
p21321	0.000469055	6.48208e-07	1	4.39025	4.39025	4.39025	4.39025	4.39025	4.39025	TCONS_00005018	2	+	219838968	219842709	3741	2	XLOC_001866	Intergenic	HumanLincRNACatalog
p21325	0.000184562	2.51567e-13	1	4.39025	4.39025	4.39025	4.39025	4.39025	4.39025	TCONS_00005022	2	+	219840980	219842709	1729	3	XLOC_001866	Intergenic	HumanLincRNACatalog
p21331	1.8023e-10	0.000191581	1	4.39025	4.39025	4.39025	4.39025	4.39025	4.39025	TCONS_00004035	2	+	221605023	221605403	380	2	XLOC_001873	Intergenic	HumanLincRNACatalog
p21339	1.36904e-10	0.441303	1	4.39025	4.39025	4.39025	4.39025	4.39025	4.39025	TCONS_00004043	2	+	224904214	224907185	2971	2	XLOC_001882	Divergent	HumanLincRNACatalog
p21341	1.79394e-06	7.45725e-12	0.582061	58.9893	52.7037	39.7319	59.5837	0.431519	28.1233	TCONS_00004050	2	+	229554324	229579362	25038	3	XLOC_001892	Intergenic	HumanLincRNACatalog
p21343	0.00730436	3.3616e-07	1	4.39025	4.39025	4.39025	4.39025	4.39025	4.39025	TCONS_00003127	2	+	235017359	235018125	766	3	XLOC_001901	Intergenic	HumanLincRNACatalog
p21344	1.31474e-05	2.05905e-13	1	4.39025	4.39025	4.39025	4.39025	4.39025	4.39025	TCONS_00004057	2	+	235591336	235632116	40780	4	XLOC_001903	Intergenic	HumanLincRNACatalog
p21350	5.01942e-11	1.8947e-10	2.19396	62.8519	34.3077	5.15449	58.2569	92.5198	73.6965	TCONS_00005041	2	+	239463184	239468090	4906	2	XLOC_001916	Intergenic	HumanLincRNACatalog
p21351	5.32194e-10	2.48194e-06	1.4809	205.159	29.8088	279.41	44.8059	256.419	460.517	TCONS_00005044	2	+	241625506	241627900	2394	3	XLOC_001920	Intergenic	HumanLincRNACatalog
p25123	9.65577e-11	1.91713e-11	1.62319	114.025	163.534	134.834	50.3727	148.094	470.927	XR_109965.3	2	-	28371421	28429828	58407	3	LOC100505736	Intronic	RefSeq
p25138	4.11872e-08	0.000153324	1.31466	1035.29	843.859	1192.22	676.547	1498.42	1862.83	XR_109905.2	2	-	111964387	112005818	41431	2	LOC100505634	Intergenic	RefSeq
p25141	4.54583e-09	0.00096738	1	4.39025	4.39025	4.39025	4.39025	4.39025	4.39025	NR_034130.1	2	-	114735245	114737561	2316	1	LOC100499194	Intergenic	RefSeq
p25147	1.26515e-09	2.27125e-14	1	4.39025	4.39025	4.39025	4.39025	4.39025	4.39025	NR_045375.1	2	-	166713984	166728451	14467	4	LOC100506124	Intergenic	RefSeq
p25152	4.36952e-09	0.00012342	1	4.39025	4.39025	4.39025	4.39025	4.39025	4.39025	XR_108383.1	2	-	237964069	237964827	758	2	LOC93463	Intergenic	RefSeq
p25156	0.000128004	9.14574e-10	1	4.39025	4.39025	4.39025	4.39025	4.39025	4.39025	NR_027251.1	2	+	43454349	43455994	1645	1	LOC100129726	Divergent	RefSeq
p25163	0.064227	2.39136e-11	1.33577	657.07	591.837	208.847	957.746	152.929	836.554	XR_109927.1	2	+	102599926	102601567	1641	3	LOC100506328	Intergenic	RefSeq
p25165	9.64634e-11	0.0033219	1	4.39025	4.39025	4.39025	4.39025	4.39025	4.39025	NR_037857.1	2	+	122407229	122486136	78907	4	LOC254128	Antisense	RefSeq
p25167	0.106738	4.46433e-05	1.79422	215.506	31.8572	139.369	216.321	198.437	279.125	XR_109895.1	2	+	132440057	132442392	2335	2	LOC100507474	Intergenic	RefSeq
p26087	7.7921e-05	0.160402	0.861675	66.9458	81.28	91.056	59.5598	69.1124	77.5108	uc002rxj.1	2	-	53990097	53992017	1920	1	AX747197	Intronic	UCSC
p26091	0.204202	2.37305e-12	1	4.39025	4.39025	4.39025	4.39025	4.39025	4.39025	uc021vkt.1	2	-	89156873	89630175	473302	300	abParts	Intergenic	UCSC
p26096	1.17169e-09	0.0107055	1	4.39025	4.39025	4.39025	4.39025	4.39025	4.39025	uc002twl.1	2	-	148692827	148694932	2105	1	AK055257	Antisense	UCSC
p26102	1.24673e-08	0.0609282	0.355688	1076.77	973.435	1241.92	94.3742	349.761	726.837	uc002vbd.1	2	-	206983254	206984146	892	1	AX747742	Intergenic	UCSC
p26105	0.000588795	0.439232	1	4.39025	4.39025	4.39025	4.39025	4.39025	4.39025	uc002vvl.1	2	-	235361542	235363353	1811	1	AX748264	Intergenic	UCSC
p26109	1.36332e-07	5.55111e-06	1	4.39025	4.39025	4.39025	4.39025	4.39025	4.39025	uc010fcy.1	2	+	65663844	66299751	635907	10	FLJ16124	Intergenic	UCSC
p26110	0.106196	8.56131e-10	1	4.39025	4.39025	4.39025	4.39025	4.39025	4.39025	uc002shv.1	2	+	71410052	71411508	1456	1	AF090102	Antisense	UCSC
p26114	4.13035e-06	4.67792e-11	1.69427	304.555	240.25	65.2058	445.847	112.895	474.78	uc002sut.1	2	+	96080755	96082345	1590	1	AX747836	Intergenic	UCSC
p26118	6.83022e-10	3.14845e-09	1	4.39025	4.39025	4.39025	4.39025	4.39025	4.39025	uc002thg.1	2	+	112249106	112249838	732	1	AX747531	Intergenic	UCSC
p26119	0.00087148	9.64807e-10	0.746102	305.172	76.561	144.39	108.586	92.6709	191.285	uc002tji.1	2	+	113963502	113966973	3471	1	AK123617	Intergenic	UCSC
p26120	0.839413	5.56277e-09	0.871001	215.739	151.621	175.371	254.928	66.4892	151.302	uc010fkt.3	2	+	113993106	114024580	31474	5	LOC654433	Antisense	UCSC
p26130	3.1515e-09	0.549947	1.31825	135.765	94.2681	139.583	139.778	151.072	196.396	uc002vvr.1	2	+	235904746	235905261	515	1	BC148242	Intronic	UCSC
p26132	1.86138e-08	0.000616281	0.861452	219.751	298.227	61.2107	149.387	0.0954705	349.46	uc002vwe.1	2	+	237478467	237480261	1794	1	AK023507	Antisense	UCSC
p26134	0.000182211	6.82149e-16	1.69495	3111.05	1813.3	453.531	3282.58	2786.92	3045.71	uc010zph.2	2	+	243064437	243081022	16585	2	LOC728323	Intergenic	UCSC
p26749	3.13389e-06	1.29477e-12	0.745378	64.4332	72.0111	82.6293	30.4256	95.2872	37.5798	HIT000067566	2	-	66793322	66793943	621	1	HIX0030115	Intronic	H-InvDB
p26750	9.73796e-11	0.817453	1	4.39025	4.39025	4.39025	4.39025	4.39025	4.39025	HIT000487365	2	-	85886445	85888635	2190	2	HIX0002227	Antisense	H-InvDB
p26751	0.00373348	3.6866e-08	1	4.39025	4.39025	4.39025	4.39025	4.39025	4.39025	HIT000393314_03	2	-	87257798	87258284	486	1	HIX0002242	Intergenic	H-InvDB
p26756	8.21773e-06	0.013897	1.43881	84.3116	41.5026	30.7423	94.5283	29.3511	101.375	HIT000067251	2	+	62230725	62231273	548	1	HIX0030109	Intronic	H-InvDB
p26761	1.76559e-10	0.43315	1.62026	5779.21	2136.39	2173.65	2218.28	4288.44	9840.54	eHIT000015328	2	+	112896646	112897862	1216	4	HIX0203994	Intronic	H-InvDB
p26763	2.99807e-07	8.32898e-16	1	4.39025	4.39025	4.39025	4.39025	4.39025	4.39025	eHIT000014526	2	+	242627303	242629418	2115	2	HIX0203982	Divergent	H-InvDB
p27362	0.000612985	1.27267e-09	0.631358	4764.12	2616.59	2836.33	541.156	1686.77	4222.68	uc.50-	2	-	38976300	38976522	222	1	uc.50-	Intronic	UCR
p27370	0.00489112	1.45675e-12	1.00193	85.086	76.507	19.3549	24.8975	99.9302	56.4697	uc.58-	2	-	60297962	60298165	203	1	uc.58-	Intergenic	UCR
p27373	4.38002e-08	8.29638e-05	0.668908	99.0342	173.768	10.975	6.71898	83.7841	99.3175	uc.62-	2	-	60780681	60780915	234	1	uc.62-	Divergent	UCR
p27380	0.006887	6.0654e-13	1	4.39025	4.39025	4.39025	4.39025	4.39025	4.39025	uc.69-	2	-	144112109	144112410	301	1	uc.69-	Intronic	UCR
p27383	3.23943e-07	3.34561e-11	2.90102	282.815	92.3963	33.3825	296.284	481.667	407.387	uc.72-	2	-	144714971	144715378	407	1	uc.72-	Intronic	UCR
p27385	0.000622096	2.96085e-07	1	4.39025	4.39025	4.39025	4.39025	4.39025	4.39025	uc.74-	2	-	144825962	144826500	538	1	uc.74-	Intronic	UCR
p27386	0.031561	0.0014846	1	4.39025	4.39025	4.39025	4.39025	4.39025	4.39025	uc.76-	2	-	145161132	145161467	335	1	uc.76-	Intronic	UCR
p27389	0.0838364	5.93775e-06	1	4.39025	4.39025	4.39025	4.39025	4.39025	4.39025	uc.79-	2	-	145197176	145197471	295	1	uc.79-	Intronic	UCR
p27390	0.345503	0.374557	1	4.39025	4.39025	4.39025	4.39025	4.39025	4.39025	uc.80-	2	-	145200851	145201145	294	1	uc.80-	Intronic	UCR
p27398	0.000404101	8.95526e-07	0.93309	65.316	45.0754	6.83257	19.9374	33.0396	56.4035	uc.88-	2	-	162095041	162095353	312	1	uc.88-	Intergenic	UCR
p27399	0.00274846	0.0446934	1.60292	103.396	43.9859	28.4558	31.8256	134.279	115.749	uc.89-	2	-	162238672	162238979	307	1	uc.89-	Intronic	UCR
p27401	1.06993e-09	0.000275953	1	4.39025	4.39025	4.39025	4.39025	4.39025	4.39025	uc.91-	2	-	163045021	163045228	207	1	uc.91-	Intronic	UCR
p27406	0.00591385	3.85845e-09	1	4.39025	4.39025	4.39025	4.39025	4.39025	4.39025	uc.96-	2	-	172820673	172820934	261	1	uc.96-	Intronic	UCR
p27414	2.18359e-06	7.6256e-16	1.10144	94.8005	127.62	105.413	5.27141	169.677	186.139	uc.105-	2	-	174989786	174990009	223	1	uc.105-	Intronic	UCR
p27416	2.70267e-05	3.52658e-12	1	4.39025	4.39025	4.39025	4.39025	4.39025	4.39025	uc.107-	2	-	175207607	175207844	237	1	uc.107-	Intergenic	UCR
p27420	0.480968	1.24887e-07	1.01048	87.0325	20.8159	78.6775	43.4352	93.1711	51.8743	uc.47+	2	+	7774650	7774877	227	1	uc.47+	Intergenic	UCR
p27421	0.743448	1.00401e-12	1	4.39025	4.39025	4.39025	4.39025	4.39025	4.39025	uc.48+	2	+	20478332	20478630	298	1	uc.48+	Intronic	UCR
p27423	1.14656e-10	1.77927e-10	0.497206	4543.65	3721.65	1246.96	1875.92	407.246	2446.38	uc.50+	2	+	38976300	38976522	222	1	uc.50+	Intronic	UCR
p27431	3.98636e-05	3.15512e-08	1.24454	62.815	41.3835	8.27273	5.0039	90.1203	44.8508	uc.58+	2	+	60297962	60298165	203	1	uc.58+	Intergenic	UCR
p27434	0.0676356	0.000548958	1.11308	1389.35	548.553	760.689	653.816	1002.47	1347.47	uc.61+	2	+	60687572	60687898	326	1	uc.61+	Intronic	UCR
p27437	5.28238e-10	1.58661e-12	1.1449	73.7899	74.3207	82.87	88.1103	94.3879	81.9522	uc.64+	2	+	63194090	63194335	245	1	uc.64+	Intronic	UCR
p27441	0.00198627	1.65833e-06	2.47552	225.886	68.6757	13.3442	109.425	138.911	513.89	uc.68+	2	+	143914721	143914976	255	1	uc.68+	Intronic	UCR
p27442	0.00136096	3.23766e-05	1	4.39025	4.39025	4.39025	4.39025	4.39025	4.39025	uc.69+	2	+	144112109	144112410	301	1	uc.69+	Intronic	UCR
p27446	2.823e-06	7.75711e-09	1.53108	106.164	65.0903	26.933	48.6142	86.4335	168.393	uc.73+	2	+	144762312	144762513	201	1	uc.73+	Intronic	UCR
p27447	0.000611495	0.00534818	1	4.39025	4.39025	4.39025	4.39025	4.39025	4.39025	uc.74+	2	+	144825962	144826500	538	1	uc.74+	Intronic	UCR
p27450	0.172483	5.91297e-09	1	4.39025	4.39025	4.39025	4.39025	4.39025	4.39025	uc.77+	2	+	145185764	145186060	296	1	uc.77+	Intronic	UCR
p27452	0.99043	1.90177e-05	1	4.39025	4.39025	4.39025	4.39025	4.39025	4.39025	uc.79+	2	+	145197176	145197471	295	1	uc.79+	Intronic	UCR
p27457	5.78098e-06	0.000300535	1	4.39025	4.39025	4.39025	4.39025	4.39025	4.39025	uc.84+	2	+	157194705	157194914	209	1	uc.84+	Intergenic	UCR
p27461	0.264503	7.62567e-05	1	4.39025	4.39025	4.39025	4.39025	4.39025	4.39025	uc.88+	2	+	162095041	162095353	312	1	uc.88+	Intergenic	UCR
p27463	8.53704e-11	0.000597321	1	4.39025	4.39025	4.39025	4.39025	4.39025	4.39025	uc.91+	2	+	163045021	163045228	207	1	uc.91+	Intronic	UCR
p27468	5.25213e-06	0.000385585	1.483	217.55	224.969	30.287	155.52	163.244	382.406	uc.96+	2	+	172820673	172820934	261	1	uc.96+	Intronic	UCR
p27469	9.62323e-11	0.000761025	1	4.39025	4.39025	4.39025	4.39025	4.39025	4.39025	uc.97+	2	+	172822630	172823072	442	1	uc.97+	Antisense	UCR
p27476	4.94679e-09	0.0114931	1	4.39025	4.39025	4.39025	4.39025	4.39025	4.39025	uc.104+	2	+	174986933	174987149	216	1	uc.104+	Intronic	UCR
p27477	1.63867e-09	3.69416e-11	0.406716	65.1711	34.6876	79.0086	4.37578	8.0215	60.3509	uc.105+	2	+	174989786	174990009	223	1	uc.105+	Intronic	UCR
p27478	2.12954e-06	0.000185676	1	4.39025	4.39025	4.39025	4.39025	4.39025	4.39025	uc.106+	2	+	175025422	175025628	206	1	uc.106+	Intronic	UCR
p27480	0.0378862	0.00191238	0.641593	222.214	276.312	218.145	219.002	67.3761	173.433	uc.108+	2	+	176940356	176940730	374	1	uc.108+	Intergenic	UCR
p27482	1.52226e-10	9.6319e-05	1.4272	95.215	155.028	39.1466	147.371	112.872	152.772	uc.110+	2	+	237071381	237071624	243	1	uc.110+	Intergenic	UCR
p27924	0.520748	7.23417e-07	1.42018	38950.3	52419.5	7262.54	72496.1	22530.4	45049.5	hox-HOXD11-33	2	+	176798134	176798453	319	1	hox-HOXD11-33	Intronic	HOX Loci
p27925	7.95728e-09	9.80471e-05	1	4.39025	4.39025	4.39025	4.39025	4.39025	4.39025	hox-HOXD12-32	2	+	176790688	176790797	109	1	hox-HOXD12-32	Antisense	HOX Loci
p27927	4.48039e-09	4.02213e-11	1.84955	1111.04	862.063	292.294	1318.12	1176.04	1695.82	hox-HOXD8-40	2	+	176820784	176821253	469	1	hox-HOXD8-40	Intronic	HOX Loci
p28070	5.04395e-12	0.0528265	1	4.39025	4.39025	4.39025	4.39025	4.39025	4.39025	nc-HOXD10-11	2	+	176803074	176803193	119	1	nc-HOXD10-11	Antisense	HOX Loci
p28071	1.36496e-07	6.66153e-06	1	4.39025	4.39025	4.39025	4.39025	4.39025	4.39025	nc-HOXD10-12	2	+	176803294	176803453	159	1	nc-HOXD10-12	Intronic	HOX Loci
p28074	6.27623e-06	0.0043521	1.45713	1167.35	22.4492	538.458	330.136	1261.43	926.732	nc-HOXD10-15	2	+	176806874	176807005	131	1	nc-HOXD10-15	Intronic	HOX Loci
p28075	0.156154	0.000653198	1	4.39025	4.39025	4.39025	4.39025	4.39025	4.39025	nc-HOXD10-7	2	+	176799824	176800213	389	1	nc-HOXD10-7	Intronic	HOX Loci
p28076	6.21677e-06	0.000604134	0.518629	99.3569	162.915	129.625	59.1447	31.7979	112.306	nc-HOXD10-8	2	+	176800324	176802113	1789	1	nc-HOXD10-8	Antisense	HOX Loci
p28080	0.0172364	0.0017155	1	4.39025	4.39025	4.39025	4.39025	4.39025	4.39025	nc-HOXD13-2	2	+	176782666	176782855	189	1	nc-HOXD13-2	Intergenic	HOX Loci
p28083	0.131936	0.0012921	1	4.39025	4.39025	4.39025	4.39025	4.39025	4.39025	nc-HOXD1-48	2	+	176871979	176872118	139	1	nc-HOXD1-48	Intergenic	HOX Loci
p28084	6.44487e-08	4.21506e-05	1.47156	1224.5	880.269	820.818	1432.02	764.809	2108.33	nc-HOXD3-37	2	+	176843485	176843654	169	1	nc-HOXD3-37	Intronic	HOX Loci
p28087	7.15048e-08	3.00048e-10	1	4.39025	4.39025	4.39025	4.39025	4.39025	4.39025	nc-HOXD3-41	2	+	176850965	176851094	129	1	nc-HOXD3-41	Intronic	HOX Loci
p28089	1.58789e-08	1.57994e-06	1.08406	96.7047	188.012	89.6735	49.6693	197.678	158.514	nc-HOXD3-43	2	+	176852745	176853114	369	1	nc-HOXD3-43	Intronic	HOX Loci
p28090	0.00741929	0.483361	0.888	4056.95	2906.34	4474	1109.19	3073.31	5973.83	nc-HOXD3-44	2	+	176853205	176853304	99	1	nc-HOXD3-44	Intronic	HOX Loci
p28097	1.20233e-06	0.014469	2.02807	167.635	111.176	37.2411	180.33	153.172	307.471	nc-HOXD4-28	2	+	176831434	176831683	249	1	nc-HOXD4-28	Intronic	HOX Loci
p28098	1.08766e-12	0.85762	1	4.39025	4.39025	4.39025	4.39025	4.39025	4.39025	nc-HOXD4-29	2	+	176832462	176832751	289	1	nc-HOXD4-29	Intronic	HOX Loci
p28099	3.52373e-07	1.39805e-08	0.678349	63.4404	8.4352	93.0155	46.1059	25.2509	40.497	nc-HOXD4-30	2	+	176835385	176835494	109	1	nc-HOXD4-30	Antisense	HOX Loci
p28105	0.000627148	4.62986e-07	1.77301	401.268	178.935	206.492	84.7511	729.745	580.322	nc-HOXD4-36	2	+	176841355	176841618	263	1	nc-HOXD4-36	Intronic	HOX Loci
p28187	9.62222e-11	0.0952845	1	4.39025	4.39025	4.39025	4.39025	4.39025	4.39025	int-HOXD3-4	2	+	176861153	176861292	139	1	int-HOXD3-4	Intronic	HOX Loci
p29230	0.000327197	1.69141e-05	1	4.39025	4.39025	4.39025	4.39025	4.39025	4.39025	ENST00000590678.1	2	-	305840	309183	3343	2	ENSG00000235779.2	Intergenic	ENSEMBL
p29239	0.00197863	6.46178e-07	1	4.39025	4.39025	4.39025	4.39025	4.39025	4.39025	ENST00000434020.1	2	-	43324883	43329829	4946	2	ENSG00000230587.1	Intergenic	ENSEMBL
p29245	0.706387	1.558e-05	1.12023	213.597	154.896	256.333	177.551	171.03	351.369	ENST00000435880.2	2	-	70189394	70314147	124753	11	ENSG00000179818.7	Antisense	ENSEMBL
p29246	0.30231	0.0109645	1	4.39025	4.39025	4.39025	4.39025	4.39025	4.39025	ENST00000596259.1	2	-	70190385	70191906	1521	2	ENSG00000179818.7	Divergent	ENSEMBL
p29247	1.54957e-10	0.0246911	1.56373	210.051	154.354	138.615	294.404	121.717	370.467	ENST00000424748.1	2	-	70321025	70322298	1273	2	ENSG00000226505.1	Intergenic	ENSEMBL
p29249	3.47666e-05	5.8734e-06	1	4.39025	4.39025	4.39025	4.39025	4.39025	4.39025	ENST00000439192.1	2	-	74185096	74208560	23464	2	ENSG00000237883.1	Antisense	ENSEMBL
p29253	4.97693e-07	3.78315e-08	1	4.39025	4.39025	4.39025	4.39025	4.39025	4.39025	ENST00000416758.1	2	-	114285144	114300249	15105	3	ENSG00000231943.3	Intergenic	ENSEMBL
p29255	0.292259	0.492612	1.54759	1163.61	521.524	799.227	1383.16	978.528	1483.1	ENST00000454312.1	2	-	154278129	154306334	28205	3	ENSG00000227400.2	Intergenic	ENSEMBL
p29257	9.31589e-11	0.242688	1	4.39025	4.39025	4.39025	4.39025	4.39025	4.39025	ENST00000440016.2	2	-	176986338	177001741	15403	4	ENSG00000237380.2	Antisense	ENSEMBL
p29265	9.71073e-11	0.0132624	1	4.39025	4.39025	4.39025	4.39025	4.39025	4.39025	ENST00000433669.1	2	+	20068651	20077296	8645	6	ENSG00000228784.1	Intergenic	ENSEMBL
p29266	1.36467e-10	0.00708464	1.24664	57.6234	92.9442	34.1835	58.859	94.4366	77.0225	ENST00000430105.1	2	+	24437249	24444385	7136	3	ENSG00000242628.1	Antisense	ENSEMBL
p29273	0.762075	2.8846e-06	1	4.39025	4.39025	4.39025	4.39025	4.39025	4.39025	ENST00000436293.2	2	+	113993845	114024587	30742	6	ENSG00000189223.8	Antisense	ENSEMBL
p29775	1.74175e-06	0.230203	1.43638	197.165	22.5792	229.15	253.971	108.577	282.233	TCONS_00005053	2	-	739587	740177	590	3	XLOC_001933	Intergenic	HumanLincRNACatalog
p29776	2.22107e-08	6.32002e-17	1	4.39025	4.39025	4.39025	4.39025	4.39025	4.39025	TCONS_00005057	2	-	747657	748673	1016	3	XLOC_001935	Intergenic	HumanLincRNACatalog
p29779	0.00581016	1.25505e-10	1.72286	40.5708	24.5942	38.3846	46.5734	83.4077	48.4202	TCONS_00002661	2	-	8147901	8468549	320648	9	XLOC_001974	Intergenic	HumanLincRNACatalog
p29780	0.000734692	3.05808e-15	1	4.39025	4.39025	4.39025	4.39025	4.39025	4.39025	TCONS_00004140	2	-	10174463	10177284	2821	2	XLOC_001984	Intergenic	HumanLincRNACatalog
p29781	4.17938e-08	6.39362e-06	0.842376	43.4421	58.44	28.5109	36.7199	44.39	28.73	TCONS_00004165	2	-	20724749	20739937	15188	4	XLOC_002010	Intergenic	HumanLincRNACatalog
p29782	1.24995e-08	1.57415e-09	1.73661	75.7466	39.4508	4.90656	6.04968	83.4821	119.043	TCONS_00005103	2	-	20733946	20739861	5915	3	XLOC_002010	Intergenic	HumanLincRNACatalog
p29783	6.27509e-10	6.9995e-06	1	4.39025	4.39025	4.39025	4.39025	4.39025	4.39025	TCONS_00005105	2	-	20737348	20739861	2513	3	XLOC_002010	Intergenic	HumanLincRNACatalog
p29788	2.27049e-09	1.92101e-08	1	4.39025	4.39025	4.39025	4.39025	4.39025	4.39025	TCONS_00005192	2	-	86130445	86131926	1481	2	XLOC_002192	Intergenic	HumanLincRNACatalog
p29796	0.0255322	0.0926508	1.28915	1049.89	400.693	1327.39	1086.37	1169.32	1325.53	TCONS_00004564	2	-	208041220	208104420	63200	4	XLOC_002473	Intergenic	HumanLincRNACatalog
p29801	0.000549698	0.00736045	1	4.39025	4.39025	4.39025	4.39025	4.39025	4.39025	TCONS_00003534	2	+	663813	666523	2710	2	XLOC_001309	Intergenic	HumanLincRNACatalog
p29804	8.98979e-10	3.76415e-08	1	4.39025	4.39025	4.39025	4.39025	4.39025	4.39025	TCONS_00002797	2	+	2875862	2876529	667	2	XLOC_001320	Intergenic	HumanLincRNACatalog
p29805	0.964908	0.0433413	0.360367	79.9626	79.6414	62.715	42.3521	8.08337	29.6809	TCONS_00003569	2	+	10589730	10597755	8025	4	XLOC_001342	Intergenic	HumanLincRNACatalog
p29809	1.69171e-10	3.29315e-06	0.804286	75.242	56.5913	80.151	54.4985	25.248	90.7495	TCONS_00003616	2	+	27938797	27978571	39774	5	XLOC_001406	Intergenic	HumanLincRNACatalog
p29813	0.714738	1.63963e-12	1	4.39025	4.39025	4.39025	4.39025	4.39025	4.39025	TCONS_00003671	2	+	48133930	48135298	1368	2	XLOC_001464	Divergent	HumanLincRNACatalog
p29815	9.66909e-08	0.0335144	1.94933	299.385	167.116	51.1904	281.468	165.448	562.234	TCONS_00002945	2	+	86116402	86119375	2973	3	XLOC_001558	Divergent	HumanLincRNACatalog
p29818	3.93476e-09	0.000128405	1.36179	300.058	340.321	220.222	396.201	42.3439	733.415	TCONS_00002718	2	+	114737145	114740835	3690	2	XLOC_001634	Intergenic	HumanLincRNACatalog
p30103	4.60292e-05	6.09897e-07	1	4.39025	4.39025	4.39025	4.39025	4.39025	4.39025	XR_171079.1	2	-	105880846	105883230	2384	1	LOC644617	Divergent	RefSeq
p30109	1.08727e-05	8.48491e-05	1	4.39025	4.39025	4.39025	4.39025	4.39025	4.39025	NR_045634.1	2	+	74375107	74379516	4409	2	BOLA3-AS1	Divergent	RefSeq
p33505	1.01544e-12	5.38411e-05	1	4.39025	4.39025	4.39025	4.39025	4.39025	4.39025	ENST00000505973.1	2	+	27805912	27858041	52129	18	ENSG00000259080.1	Antisense	ENSEMBL
p33510	9.62645e-11	4.52429e-11	0.464939	8219.68	4854.76	2883.37	2270.09	813.448	4335.86	ENST00000442524.1	2	+	234263219	234301045	37826	4	ENSG00000243637.1	Antisense	ENSEMBL
p33693	2.84424e-10	1.64788e-06	0.770403	4234.06	2693.04	3047.3	175.031	4930.57	2578.69	NR_038099.1	2	-	111203459	111230652	27193	9	LIMS3L	Antisense	RefSeq
p33800	0.00062069	0.290775	1	4.39025	4.39025	4.39025	4.39025	4.39025	4.39025	uc021vxq.1	2	+	227859553	227861591	2038	1	AX748395	Antisense	UCSC
p33869	0.00497005	0.382494	1	4.39025	4.39025	4.39025	4.39025	4.39025	4.39025	HIT000394698	2	-	166060335	166060604	269	1	HIX0002557	Antisense	H-InvDB
p33870	4.70659e-10	0.0225656	1	4.39025	4.39025	4.39025	4.39025	4.39025	4.39025	HIT000394689	2	-	167005556	167005787	231	1	HIX0002563	Antisense	H-InvDB
p33872	0.000102516	0.055249	1	4.39025	4.39025	4.39025	4.39025	4.39025	4.39025	HIT000218060	2	+	218989997	218999569	9572	4	HIX0023999	Antisense	H-InvDB
p33908	0.0462906	1.23212e-06	0.938331	2573.63	1793.38	399.313	1901.87	241.501	2329.01	uc.49-	2	-	33813408	33813615	207	1	uc.49-	Antisense	UCR
p8896	7.85126e-13	0.9776	0.998366	2587.36	3651.12	3284.71	1799.42	2699.84	5008.36	ENST00000592090.1	2	-	305624	306491	867	2	ENSG00000235779.2	Intergenic	ENSEMBL
p8902	0.0015366	1.01263e-06	1	4.39025	4.39025	4.39025	4.39025	4.39025	4.39025	ENST00000439196.1	2	-	692082	693235	1153	2	ENSG00000233970.1	Intergenic	ENSEMBL
p8905	0.00212241	1.46553e-07	4.00572	299.218	41.3281	7.56458	494.933	496.526	402.973	ENST00000415700.1	2	-	780347	863877	83530	3	ENSG00000237667.1	Intergenic	ENSEMBL
p8912	5.98773e-05	9.65693e-06	1	4.39025	4.39025	4.39025	4.39025	4.39025	4.39025	ENST00000457467.1	2	-	1344815	1350340	5525	2	ENSG00000233553.1	Intronic	ENSEMBL
p8914	8.09359e-07	0.0411441	2.34096	118.105	42.2337	14.6331	147.263	102.728	159.61	ENST00000419028.2	2	-	1576325	1584083	7758	2	ENSG00000231482.2	Intergenic	ENSEMBL
p8920	4.37805e-10	0.0010865	1	4.39025	4.39025	4.39025	4.39025	4.39025	4.39025	ENST00000425776.1	2	-	3135352	3136877	1525	2	ENSG00000236760.1	Intergenic	ENSEMBL
p8921	9.64534e-11	0.302484	1	4.39025	4.39025	4.39025	4.39025	4.39025	4.39025	ENST00000419347.1	2	-	3135756	3149551	13795	2	ENSG00000236760.1	Intergenic	ENSEMBL
p8922	9.62262e-11	1.22272e-09	1.34874	397.334	526.49	248.599	206.486	55.3832	1319.43	ENST00000454977.1	2	-	3302111	3305236	3125	2	ENSG00000224885.1	Intronic	ENSEMBL
p8924	1.35901e-07	0.123278	0.793905	203.415	210.927	279.11	140.366	150.373	259.796	ENST00000439547.1	2	-	3579573	3581372	1799	3	ENSG00000242282.2	Intergenic	ENSEMBL
p8925	4.78841e-08	1.79792e-08	0.846554	227.701	64.8278	216.092	49.4057	93.2028	287.966	ENST00000416463.1	2	-	3579578	3581733	2155	3	ENSG00000242282.2	Intergenic	ENSEMBL
p8926	8.56039e-07	1.09382e-08	1	4.39025	4.39025	4.39025	4.39025	4.39025	4.39025	ENST00000423704.1	2	-	3579579	3580960	1381	2	ENSG00000242282.2	Intergenic	ENSEMBL
p8928	9.62215e-11	5.26778e-05	1	4.39025	4.39025	4.39025	4.39025	4.39025	4.39025	ENST00000456450.1	2	-	3650986	3651832	846	2	ENSG00000237370.1	Intronic	ENSEMBL
p8930	1.40751e-07	0.0106959	1.08571	79.6169	2.80026	20.0818	9.40077	19.354	82.5289	ENST00000592948.1	2	-	4005689	4007887	2198	2	ENSG00000237401.2	Intergenic	ENSEMBL
p8932	3.63925e-10	0.0161908	1	4.39025	4.39025	4.39025	4.39025	4.39025	4.39025	ENST00000588264.1	2	-	4006856	4007887	1031	3	ENSG00000237401.2	Intergenic	ENSEMBL
p8934	0.00615212	0.00188526	1.16425	84.6511	21.8599	70.091	69.2225	74.6504	61.7363	ENST00000588796.1	2	-	4007683	4021626	13943	3	ENSG00000237401.2	Intergenic	ENSEMBL
p8951	1.35862e-14	1.84678e-05	0.883611	625.675	741.421	814.948	574.41	121.998	1231.67	ENST00000592565.1	2	-	6757945	6774055	16110	3	ENSG00000236172.2	Intergenic	ENSEMBL
p8970	0.00292225	2.99323e-06	1	4.39025	4.39025	4.39025	4.39025	4.39025	4.39025	ENST00000588330.1	2	-	6775965	6789461	13496	6	ENSG00000236172.2	Intergenic	ENSEMBL
p8971	4.07834e-05	6.74629e-05	1	4.39025	4.39025	4.39025	4.39025	4.39025	4.39025	ENST00000593269.1	2	-	6776192	6778937	2745	5	ENSG00000236172.2	Intergenic	ENSEMBL
p8973	1.76449e-05	6.08393e-06	1	4.39025	4.39025	4.39025	4.39025	4.39025	4.39025	ENST00000586129.1	2	-	6776764	6790379	13615	6	ENSG00000236172.2	Intergenic	ENSEMBL
p8981	8.85019e-05	0.000256527	1	4.39025	4.39025	4.39025	4.39025	4.39025	4.39025	ENST00000431336.1	2	-	6779254	6790651	11397	2	ENSG00000236172.2	Intergenic	ENSEMBL
p8989	0.000335585	1.83005e-11	1	4.39025	4.39025	4.39025	4.39025	4.39025	4.39025	ENST00000424179.1	2	-	6869299	6871358	2059	3	ENSG00000205837.3	Intergenic	ENSEMBL
p8995	0.195716	0.202571	1	4.39025	4.39025	4.39025	4.39025	4.39025	4.39025	ENST00000437589.1	2	-	7057162	7058810	1648	2	ENSG00000228203.1	Antisense	ENSEMBL
p9007	0.00726614	5.22487e-12	1.97207	203.143	105.25	55.4036	262.336	223.965	231.13	ENST00000412712.1	2	-	8806765	8818464	11699	4	ENSG00000235092.1	Intergenic	ENSEMBL
p9017	8.35151e-07	7.15281e-08	1	4.39025	4.39025	4.39025	4.39025	4.39025	4.39025	ENST00000590373.1	2	-	11264883	11272947	8064	2	ENSG00000145063.10	Divergent	ENSEMBL
p9019	8.52817e-05	7.86437e-05	1	4.39025	4.39025	4.39025	4.39025	4.39025	4.39025	ENST00000430897.1	2	-	11497640	11505762	8122	2	ENSG00000230952.1	Intergenic	ENSEMBL
p9022	0.0036664	5.5483e-09	1	4.39025	4.39025	4.39025	4.39025	4.39025	4.39025	ENST00000431500.2	2	-	11881122	11885427	4305	3	ENSG00000230790.2	Intronic	ENSEMBL
p9026	1.04192e-06	1.29128e-06	0.730426	171.053	139.483	190.896	157.69	7.33467	201.234	ENST00000417751.1	2	-	13850655	14541087	690432	5	ENSG00000230448.1	Intergenic	ENSEMBL
p9029	2.0479e-06	0.00322462	1	4.39025	4.39025	4.39025	4.39025	4.39025	4.39025	ENST00000448379.1	2	-	15941870	15951001	9131	2	ENSG00000237326.1	Intergenic	ENSEMBL
p9036	0.000114612	0.0954218	1.19657	201.024	82.0336	155.621	188.51	100.844	235.556	ENST00000439745.1	2	-	16408294	16409462	1168	2	ENSG00000231266.1	Intergenic	ENSEMBL
p9042	3.2959e-10	0.000218026	1.17064	60.6462	40.167	17.5456	36.3768	25.6029	76.5757	ENST00000449124.1	2	-	19244621	19546509	301888	5	ENSG00000236204.1	Intergenic	ENSEMBL
p9051	1.42726e-12	2.48704e-07	1	4.39025	4.39025	4.39025	4.39025	4.39025	4.39025	ENST00000435682.1	2	-	21910305	21933495	23190	3	ENSG00000229621.1	Intergenic	ENSEMBL
p9059	1.47478e-07	6.33653e-08	0.995285	75.979	34.979	70.4794	58.0103	62.6633	59.9084	ENST00000421563.1	2	-	23598099	23604170	6071	4	ENSG00000235497.1	Intergenic	ENSEMBL
p9063	3.24928e-11	0.0667066	1.04157	207.532	261.316	46.5074	26.9367	137.045	372.797	ENST00000429717.1	2	-	24422707	24424567	1860	2	ENSG00000223754.1	Intergenic	ENSEMBL
p9064	9.88412e-09	0.0321872	1.14546	57.718	23.9909	55.2871	91.0608	13.1128	52.7493	ENST00000431557.1	2	-	25592041	25598714	6673	2	ENSG00000235072.1	Intergenic	ENSEMBL
p9068	1.50928e-10	0.00052595	1	4.39025	4.39025	4.39025	4.39025	4.39025	4.39025	ENST00000423923.1	2	-	27236677	27237429	752	2	ENSG00000205500.4	Intronic	ENSEMBL
p9072	0.208977	2.50008e-14	1	4.39025	4.39025	4.39025	4.39025	4.39025	4.39025	ENST00000431376.1	2	-	28856147	28887406	31259	2	ENSG00000230730.1	Antisense	ENSEMBL
p9083	1.26094e-06	7.08415e-06	1.80675	84.7852	16.2096	4.5417	18.5525	86.1049	86.0203	ENST00000414796.1	2	-	35223344	35225227	1883	3	ENSG00000237320.1	Intergenic	ENSEMBL
p9084	0.754937	0.43112	1.71237	410.128	362.575	465.613	708.013	681.597	730.852	ENST00000413792.1	2	-	38053389	38056575	3186	3	ENSG00000237803.1	Intergenic	ENSEMBL
p9092	5.05975e-09	4.99274e-11	0.820133	99.8601	145.221	159.635	22.8317	118.848	190.242	ENST00000446277.1	2	-	38895829	38898563	2734	4	ENSG00000232518.1	Intronic	ENSEMBL
p9093	1.33866e-05	0.0242421	1	4.39025	4.39025	4.39025	4.39025	4.39025	4.39025	ENST00000594472.1	2	-	39219419	39220977	1558	2	ENSG00000229692.2	Intronic	ENSEMBL
p9096	0.0266931	1.52296e-09	1.46666	127.795	136.09	5.3145	192.564	65.2511	137.009	ENST00000422013.2	2	-	42370377	42397371	26994	4	ENSG00000224875.2	Antisense	ENSEMBL
p9099	0.616544	6.18043e-07	1	4.39025	4.39025	4.39025	4.39025	4.39025	4.39025	ENST00000457457.2	2	-	43228494	43233200	4706	3	ENSG00000224739.2	Intergenic	ENSEMBL
p9101	3.77907e-09	1.31569e-07	1	4.39025	4.39025	4.39025	4.39025	4.39025	4.39025	ENST00000449766.1	2	-	43259639	43266686	7047	4	ENSG00000231826.1	Intergenic	ENSEMBL
p9108	2.60625e-09	0.276629	1.05313	728.9	650.725	243.699	182.315	516.949	1010.31	ENST00000430847.2	2	-	45157115	45162498	5383	2	ENSG00000259439.1	Intergenic	ENSEMBL
p9117	8.0603e-06	2.61826e-11	1.14104	77.9603	77.5296	43.4514	16.2487	74.3465	136.405	ENST00000444077.1	2	-	46305153	46305967	814	2	ENSG00000232696.1	Intronic	ENSEMBL
p9125	2.74813e-10	3.89801e-05	2.12851	224.782	57.3157	64.1381	67.2737	54.7441	614.95	ENST00000419035.1	2	-	47441087	47572105	131018	3	ENSG00000234690.2	Intergenic	ENSEMBL
p9132	6.44062e-11	0.0145423	1.11401	87.8573	52.6411	14.2034	3.75691	43.4246	125.157	ENST00000431130.2	2	-	54772504	54773814	1310	2	ENSG00000234943.2	Intronic	ENSEMBL
p9135	0.00620561	3.68239e-11	1.07004	4079.68	2460.58	3981.42	3801.8	2393.59	5063.2	ENST00000366153.2	2	-	55441522	55443262	1740	2	ENSG00000203327.2	Intronic	ENSEMBL
p9140	4.07083e-08	0.301504	1.08299	46.847	42.2024	21.643	15.2264	75.1937	29.4589	ENST00000443306.1	2	-	59465850	59476807	10957	3	ENSG00000233891.3	Intergenic	ENSEMBL
p9145	0.000335176	0.00646615	1.02978	1138.28	1145.14	161.602	321.635	1082.62	1113.57	ENST00000457668.1	2	-	60577729	60580151	2422	2	ENSG00000228590.1	Intergenic	ENSEMBL
p9146	1.60207e-09	1.15622e-05	1	4.39025	4.39025	4.39025	4.39025	4.39025	4.39025	ENST00000453476.1	2	-	60586350	60618510	32160	2	ENSG00000223929.1	Intergenic	ENSEMBL
p9164	1.3612e-07	0.000351678	1	4.39025	4.39025	4.39025	4.39025	4.39025	4.39025	ENST00000441630.1	2	-	64622353	64680932	58579	4	ENSG00000223935.1	Divergent	ENSEMBL
p9171	5.05454e-07	3.61667e-06	0.890518	100.857	30.7005	81.5235	16.4977	56.4517	116.803	ENST00000600508.1	2	-	65669188	65683462	14274	4	ENSG00000234255.3	Intergenic	ENSEMBL
p9175	7.50904e-12	8.27187e-09	1.10231	87.1593	85.0971	12.7385	34.2838	73.3018	96.3366	ENST00000420724.1	2	-	65816699	65867311	50612	4	ENSG00000235725.1	Intergenic	ENSEMBL
p9179	0.326027	0.335396	1	4.39025	4.39025	4.39025	4.39025	4.39025	4.39025	ENST00000454595.1	2	-	66666574	66668968	2394	2	ENSG00000244522.1	Antisense	ENSEMBL
p9189	9.74521e-09	0.00013061	1.25913	109.293	64.07	86.7156	60.5572	72.9503	193.965	ENST00000415342.1	2	-	69927323	69940979	13656	2	ENSG00000231024.1	Intergenic	ENSEMBL
p9190	0.288341	4.39872e-13	1	4.39025	4.39025	4.39025	4.39025	4.39025	4.39025	ENST00000457076.1	2	-	70190519	70314452	123933	4	ENSG00000179818.7	Divergent	ENSEMBL
p9191	0.264784	0.00845413	1	4.39025	4.39025	4.39025	4.39025	4.39025	4.39025	ENST00000413436.1	2	-	70190594	70314944	124350	7	ENSG00000179818.7	Antisense	ENSEMBL
p9194	0.00419861	0.000607905	1	4.39025	4.39025	4.39025	4.39025	4.39025	4.39025	ENST00000594376.1	2	-	70220997	70280917	59920	4	ENSG00000179818.7	Intergenic	ENSEMBL
p9197	0.000140567	0.000146187	1	4.39025	4.39025	4.39025	4.39025	4.39025	4.39025	ENST00000429599.2	2	-	70258985	70313405	54420	6	ENSG00000179818.7	Intergenic	ENSEMBL
p9198	2.30544e-09	6.33616e-13	1.66246	12728.5	4321.13	430.036	4714.01	2976.46	21368.7	ENST00000444410.1	2	-	70259360	70314147	54787	7	ENSG00000179818.7	Divergent	ENSEMBL
p9199	0.0463519	1.22752e-07	1	4.39025	4.39025	4.39025	4.39025	4.39025	4.39025	ENST00000458698.1	2	-	70273653	70314436	40783	5	ENSG00000179818.7	Divergent	ENSEMBL
p9202	2.59555e-08	5.31527e-16	1.8159	216.927	210.895	140.515	232.503	296.485	503.056	ENST00000602091.1	2	-	70277942	70287238	9296	2	ENSG00000179818.7	Intergenic	ENSEMBL
p9203	9.96798e-08	2.08299e-10	1	4.39025	4.39025	4.39025	4.39025	4.39025	4.39025	ENST00000437019.1	2	-	70310711	70313313	2602	2	ENSG00000179818.7	Intergenic	ENSEMBL
p9206	0.334714	0.222636	1	4.39025	4.39025	4.39025	4.39025	4.39025	4.39025	ENST00000453130.1	2	-	71174669	71221879	47210	4	ENSG00000258881.1	Antisense	ENSEMBL
p9209	0.57552	2.32418e-06	2.46758	104.689	36.6759	44.2869	194.033	199.46	64.6172	ENST00000479098.1	2	-	74725814	74726494	680	2	ENSG00000258821.1	Intronic	ENSEMBL
p9210	0.00883968	0.281316	2.50878	165.503	14.2746	34.3893	163.921	184.824	188.552	ENST00000418001.1	2	-	75146681	75151973	5292	2	ENSG00000236209.1	Intergenic	ENSEMBL
p9212	0.000553565	4.75555e-09	0.404013	87.7454	72.1916	96.6281	34.3704	6.17945	63.1058	ENST00000443301.1	2	-	79720841	79727970	7129	5	ENSG00000229385.1	Intergenic	ENSEMBL
p9213	0.0109416	0.00190044	1	4.39025	4.39025	4.39025	4.39025	4.39025	4.39025	ENST00000418621.1	2	-	80255137	80257677	2540	3	ENSG00000224731.1	Intronic	ENSEMBL
p9214	6.79563e-08	1.09625e-06	1	4.39025	4.39025	4.39025	4.39025	4.39025	4.39025	ENST00000430876.1	2	-	80802237	80843663	41426	3	ENSG00000237031.2	Antisense	ENSEMBL
p9215	9.67739e-11	9.32761e-21	1	4.39025	4.39025	4.39025	4.39025	4.39025	4.39025	ENST00000596887.1	2	-	80806021	80832758	26737	2	ENSG00000237031.2	Antisense	ENSEMBL
p9227	0.0595335	7.34316e-05	1	4.39025	4.39025	4.39025	4.39025	4.39025	4.39025	ENST00000430694.1	2	-	89156708	89165653	8945	3	ENSG00000231486.3	Intergenic	ENSEMBL
p9228	8.63545e-05	0.0563731	0.756771	95.3506	96.0884	148.267	161.434	34.588	61.0577	ENST00000448734.1	2	-	95690937	95692454	1517	3	ENSG00000233850.1	Antisense	ENSEMBL
p9229	4.96993e-09	5.23021e-08	1.17617	62.1919	18.941	90.9746	23.8046	96.036	82.5864	ENST00000442200.1	2	-	95717139	95718921	1782	2	ENSG00000231062.1	Intronic	ENSEMBL
p9238	4.77483e-06	3.62072e-06	1	4.39025	4.39025	4.39025	4.39025	4.39025	4.39025	ENST00000593408.1	2	-	98081850	98088912	7062	5	ENSG00000230606.4	Intergenic	ENSEMBL
p9240	1.71259e-07	7.21612e-10	1	4.39025	4.39025	4.39025	4.39025	4.39025	4.39025	ENST00000431244.1	2	-	98088088	98088849	761	2	ENSG00000230606.4	Intergenic	ENSEMBL
p9245	2.13754e-06	0.000194003	1.87733	305.681	70.0302	307.137	404.419	458.529	418.982	ENST00000443030.1	2	-	101338682	101339344	662	2	ENSG00000228488.1	Intergenic	ENSEMBL
p9246	2.01104e-11	2.44517e-13	1	4.39025	4.39025	4.39025	4.39025	4.39025	4.39025	ENST00000433012.1	2	-	101592087	101593623	1536	2	ENSG00000230140.1	Intronic	ENSEMBL
p9250	4.44577e-06	0.680663	1	4.39025	4.39025	4.39025	4.39025	4.39025	4.39025	ENST00000431897.1	2	-	103583865	103600887	17022	4	ENSG00000224095.1	Intergenic	ENSEMBL
p9259	1.10946e-09	1.37403e-08	1.15351	77.7908	87.4691	74.0951	76.0193	97.2173	102.863	ENST00000447876.1	2	-	105424030	105469641	45611	4	ENSG00000233639.1	Intergenic	ENSEMBL
p9276	0.000674944	2.54826e-14	1	4.39025	4.39025	4.39025	4.39025	4.39025	4.39025	ENST00000424355.1	2	-	108665655	108669211	3556	3	ENSG00000231221.1	Intergenic	ENSEMBL
p9277	5.27432e-10	0.132627	0.538016	46.0693	81.1672	94.0753	84.3639	2.22604	32.4793	ENST00000445083.1	2	-	108784203	108834297	50094	5	ENSG00000225328.1	Intergenic	ENSEMBL
p9279	3.76112e-09	0.162147	1	4.39025	4.39025	4.39025	4.39025	4.39025	4.39025	ENST00000440975.1	2	-	109128144	109150638	22494	2	ENSG00000214184.3	Divergent	ENSEMBL
p9284	2.14098e-08	5.40818e-10	0.986445	78.5956	19.7315	78.5698	0.210276	71.3737	102.915	ENST00000376593.2	2	-	111855921	111871762	15841	3	ENSG00000204581.2	Intronic	ENSEMBL
p9286	1.37627e-06	0.05756	1	4.39025	4.39025	4.39025	4.39025	4.39025	4.39025	ENST00000439362.1	2	-	111965352	112252625	287273	6	ENSG00000172965.7	Intergenic	ENSEMBL
p9289	0.352836	0.0261183	1.7031	1067.68	144.414	456.345	638.317	452.877	1750.33	ENST00000451884.1	2	-	112005726	112123291	117565	3	ENSG00000172965.7	Intergenic	ENSEMBL
p9290	2.76324e-09	4.93777e-10	0.575957	5198.18	3821.43	2504.98	1695.31	926.716	4015.64	ENST00000409569.2	2	-	112186885	112252663	65778	2	ENSG00000172965.7	Intergenic	ENSEMBL
p9291	7.52403e-09	3.23206e-08	0.704494	6574.46	4719.69	4853.95	4094.12	1816.73	5465.4	ENST00000419736.1	2	-	112186888	112252628	65740	4	ENSG00000172965.7	Intergenic	ENSEMBL
p9292	3.16696e-10	5.41617e-06	1.01798	5394.75	581.959	3404.64	1904.57	3881.57	3763.89	ENST00000308604.5	2	-	112186895	112252565	65670	3	ENSG00000172965.7	Intergenic	ENSEMBL
p9295	9.68658e-11	0.00632429	1	4.39025	4.39025	4.39025	4.39025	4.39025	4.39025	ENST00000439494.1	2	-	112227214	112237838	10624	4	ENSG00000172965.7	Intergenic	ENSEMBL
p9297	4.20789e-09	2.05044e-05	2.2016	102.96	38.2498	36.1769	85.0857	160.904	144.545	ENST00000446590.1	2	-	113929111	113932914	3803	2	ENSG00000234174.1	Antisense	ENSEMBL
p9298	0.66368	3.83374e-06	2.04408	705.815	250.373	322.855	915.354	836.132	862.982	ENST00000438409.1	2	-	113931179	113932937	1758	2	ENSG00000234174.1	Antisense	ENSEMBL
p9300	1.32262e-07	3.27461e-08	1.17868	93.6098	144.372	46.1971	89.9212	143.58	101.454	ENST00000416105.1	2	-	114286496	114300235	13739	4	ENSG00000231943.3	Intergenic	ENSEMBL
p9301	0.00131932	0.000307187	1	4.39025	4.39025	4.39025	4.39025	4.39025	4.39025	ENST00000424612.1	2	-	114435278	114461655	26377	3	ENSG00000227359.1	Intergenic	ENSEMBL
p9302	2.66285e-05	0.795899	1	4.39025	4.39025	4.39025	4.39025	4.39025	4.39025	ENST00000435407.1	2	-	114586966	114588696	1730	2	ENSG00000244063.1	Intergenic	ENSEMBL
p9305	8.75679e-07	1.95448e-11	1	4.39025	4.39025	4.39025	4.39025	4.39025	4.39025	ENST00000450325.1	2	-	114879850	114880870	1020	2	ENSG00000235242.1	Intergenic	ENSEMBL
p9308	0.0018519	0.0460489	1	4.39025	4.39025	4.39025	4.39025	4.39025	4.39025	ENST00000448663.1	2	-	115888511	115918768	30257	5	ENSG00000235026.1	Intronic	ENSEMBL
p9311	2.88373e-10	4.11117e-05	1	4.39025	4.39025	4.39025	4.39025	4.39025	4.39025	ENST00000414886.1	2	-	118889703	118943962	54259	4	ENSG00000226856.1	Intergenic	ENSEMBL
p9316	1.16599e-10	8.34919e-07	1.50383	166.121	128.22	127.62	90.9908	181.954	361.612	ENST00000556770.1	2	-	119706881	119710559	3678	2	ENSG00000259094.1	Intronic	ENSEMBL
p9322	8.54111e-08	1.47703e-12	1	4.39025	4.39025	4.39025	4.39025	4.39025	4.39025	ENST00000421820.1	2	-	121466838	121468093	1255	2	ENSG00000229774.1	Intergenic	ENSEMBL
p9332	0.00607574	1.80345e-09	1.30393	60.1212	0.170288	8.25253	61.1727	10.9101	17.2936	ENST00000450531.1	2	-	130626765	130635126	8361	2	ENSG00000229536.1	Intergenic	ENSEMBL
p9334	1.13195e-05	9.94135e-07	0.712439	61.6711	87.5254	75.3507	86.3487	34.0606	39.5669	ENST00000448777.1	2	-	131501110	131513452	12342	2	ENSG00000229797.1	Antisense	ENSEMBL
p9343	7.62878e-09	0.367583	1	4.39025	4.39025	4.39025	4.39025	4.39025	4.39025	ENST00000392929.2	2	-	135493033	135676240	183207	4	ENSG00000224043.3	Antisense	ENSEMBL
p9344	0.00568576	0.0548892	0.587045	86.5321	56.2241	83.8712	41.8324	47.9544	43.2538	ENST00000537615.1	2	-	135624631	135676176	51545	5	ENSG00000224043.3	Antisense	ENSEMBL
p9348	0.000200855	2.25234e-06	1	4.39025	4.39025	4.39025	4.39025	4.39025	4.39025	ENST00000431985.1	2	-	139175853	139259268	83415	4	ENSG00000228043.1	Divergent	ENSEMBL
p9353	2.0894e-07	0.562792	1.33836	1055.99	1258.91	456.454	1220.37	1186	1302.69	ENST00000549032.1	2	-	144052989	144238358	185369	4	ENSG00000228655.2	Antisense	ENSEMBL
p9354	9.62377e-11	0.0023692	1	4.39025	4.39025	4.39025	4.39025	4.39025	4.39025	ENST00000546678.1	2	-	144053154	144329674	276520	3	ENSG00000257640.1	Antisense	ENSEMBL
p9355	3.36804e-09	0.217141	3.46453	1286.59	182.324	1196.83	1222.24	945.914	7067.41	ENST00000442794.1	2	-	144072002	144238350	166348	4	ENSG00000228655.2	Antisense	ENSEMBL
p9357	3.21385e-08	0.000142482	1.38519	312.992	265.777	227.891	116.236	215.484	785.656	ENST00000553076.1	2	-	144276435	144355571	79136	5	ENSG00000258268.1	Antisense	ENSEMBL
p9367	1.57443e-05	9.15889e-07	1	4.39025	4.39025	4.39025	4.39025	4.39025	4.39025	ENST00000601658.1	2	-	149624038	149646351	22313	4	ENSG00000231079.2	Antisense	ENSEMBL
p9368	7.39237e-05	0.0100247	1	4.39025	4.39025	4.39025	4.39025	4.39025	4.39025	ENST00000446781.2	2	-	149635443	149643156	7713	2	ENSG00000231079.2	Intronic	ENSEMBL
p9370	1.92448e-11	1.43513e-08	1	4.39025	4.39025	4.39025	4.39025	4.39025	4.39025	ENST00000433174.1	2	-	150672977	150714199	41222	2	ENSG00000162947.4	Intergenic	ENSEMBL
p9373	3.85503e-07	1.98938e-08	1	4.39025	4.39025	4.39025	4.39025	4.39025	4.39025	ENST00000421624.1	2	-	151451615	151476581	24966	2	ENSG00000232359.1	Intergenic	ENSEMBL
p9376	0.36194	8.92046e-06	0.948436	138.19	178.63	30.3737	146.76	51.2942	131.237	ENST00000424322.1	2	-	154278320	154449801	171481	2	ENSG00000227400.2	Antisense	ENSEMBL
p9377	9.87719e-11	3.52137e-07	1	4.39025	4.39025	4.39025	4.39025	4.39025	4.39025	ENST00000443901.1	2	-	155552973	155554329	1356	2	ENSG00000235949.1	Divergent	ENSEMBL
p9384	0.0774614	1.17899e-10	1	4.39025	4.39025	4.39025	4.39025	4.39025	4.39025	ENST00000418770.1	2	-	160527222	160568529	41307	3	ENSG00000226266.1	Divergent	ENSEMBL
p9389	0.000285577	2.00576e-05	1	4.39025	4.39025	4.39025	4.39025	4.39025	4.39025	ENST00000457108.1	2	-	166689557	166695608	6051	3	ENSG00000232411.1	Intergenic	ENSEMBL
p9394	1.32753e-10	9.35765e-07	0.596899	1145.71	944.562	637.769	48.7418	936.976	642.645	ENST00000425636.2	2	-	169628462	169642939	14477	3	ENSG00000227617.3	Antisense	ENSEMBL
p9395	9.62236e-11	0.00220153	0.627162	1300.56	852.141	886.609	56.0282	1146.12	703.995	ENST00000594941.1	2	-	169630864	169642907	12043	6	ENSG00000227617.3	Antisense	ENSEMBL
p9398	1.1591e-10	0.496167	1	4.39025	4.39025	4.39025	4.39025	4.39025	4.39025	ENST00000599755.1	2	-	169631330	169642939	11609	4	ENSG00000227617.3	Antisense	ENSEMBL
p9408	0.487326	9.94739e-09	0.929731	93.3373	30.6296	154.212	193.356	13.0028	52.2726	ENST00000457834.1	2	-	171201308	171207621	6313	2	ENSG00000231898.3	Intronic	ENSEMBL
p9414	0.0002657	0.000109793	1.29074	201.525	128.079	191.971	292.271	145.628	235.322	ENST00000451730.1	2	-	171672802	171673682	880	2	ENSG00000235934.1	Antisense	ENSEMBL
p9416	0.000913733	0.0105742	1.3487	291.76	383.707	43.7978	199.327	474.588	296.157	ENST00000455988.1	2	-	171672914	171674547	1633	3	ENSG00000235934.1	Antisense	ENSEMBL
p9419	5.90751e-05	0.283864	1	4.39025	4.39025	4.39025	4.39025	4.39025	4.39025	ENST00000417539.1	2	-	173329874	173330740	866	2	ENSG00000232788.1	Antisense	ENSEMBL
p9421	0.271344	0.00369486	1	4.39025	4.39025	4.39025	4.39025	4.39025	4.39025	ENST00000450443.1	2	-	173368166	173421324	53158	3	ENSG00000225205.1	Antisense	ENSEMBL
p9423	9.12993e-05	0.000626036	1	4.39025	4.39025	4.39025	4.39025	4.39025	4.39025	ENST00000444919.1	2	-	173417342	173421136	3794	2	ENSG00000225205.1	Antisense	ENSEMBL
p9427	6.56383e-06	0.0293798	1	4.39025	4.39025	4.39025	4.39025	4.39025	4.39025	ENST00000435328.1	2	-	173587913	173600934	13021	4	ENSG00000228016.1	Antisense	ENSEMBL
p9434	4.5185e-07	2.23557e-08	1.10642	94.6793	119.753	97.7957	115.699	117.343	112.414	ENST00000413969.1	2	-	177041183	177053686	12503	3	ENSG00000224189.2	Antisense	ENSEMBL
p9435	1.00099e-06	3.07974e-11	1	4.39025	4.39025	4.39025	4.39025	4.39025	4.39025	ENST00000552156.1	2	-	177041199	177042811	1612	4	ENSG00000224189.2	Intergenic	ENSEMBL
p9440	1.67408e-05	0.0130213	1.12799	76.2878	31.1003	52.0158	19.581	63.7848	96.44	ENST00000431455.1	2	-	177389606	177396411	6805	4	ENSG00000236231.1	Intergenic	ENSEMBL
p9443	2.13431e-09	0.000332747	1	4.39025	4.39025	4.39025	4.39025	4.39025	4.39025	ENST00000438143.1	2	-	177588995	177630839	41844	4	ENSG00000230552.1	Intergenic	ENSEMBL
p9447	0.00147462	0.00226129	1	4.39025	4.39025	4.39025	4.39025	4.39025	4.39025	ENST00000432925.1	2	-	177710720	177714156	3436	2	ENSG00000227098.1	Intergenic	ENSEMBL
p9450	2.74244e-07	8.162e-07	1	4.39025	4.39025	4.39025	4.39025	4.39025	4.39025	ENST00000441205.1	2	-	177855569	178029244	173675	6	ENSG00000236501.1	Intergenic	ENSEMBL
p9452	4.0225e-09	0.0764756	1	4.39025	4.39025	4.39025	4.39025	4.39025	4.39025	ENST00000430416.1	2	-	178148241	178187892	39651	5	ENSG00000213963.2	Intergenic	ENSEMBL
p9453	2.4289e-08	0.021487	1	4.39025	4.39025	4.39025	4.39025	4.39025	4.39025	ENST00000443132.1	2	-	178175454	178179646	4192	3	ENSG00000213963.2	Intergenic	ENSEMBL
p9462	4.91547e-06	0.494303	1	4.39025	4.39025	4.39025	4.39025	4.39025	4.39025	ENST00000413954.1	2	-	183960150	183972431	12281	2	ENSG00000224643.1	Antisense	ENSEMBL
p9478	0.000277159	1.04396e-07	0.8667	308.331	376.379	354.172	267.548	5.17789	627.673	ENST00000413911.1	2	-	191745522	191746785	1263	2	ENSG00000235852.1	Antisense	ENSEMBL
p9488	1.1007e-09	1.399e-05	1.92747	65.4728	24.1312	20.3696	96.0484	69.2883	46.6339	ENST00000440609.1	2	-	199417918	199637080	219162	3	ENSG00000225421.1	Intergenic	ENSEMBL
p9489	3.37478e-05	2.36118e-07	0.58785	76.334	75.4529	18.2047	15.5944	14.8848	69.4504	ENST00000456031.1	2	-	199747296	199936514	189218	3	ENSG00000231557.1	Intergenic	ENSEMBL
p9490	3.03145e-08	5.64553e-13	1	4.39025	4.39025	4.39025	4.39025	4.39025	4.39025	ENST00000601136.1	2	-	200732118	200773881	41763	3	ENSG00000232732.4	Intergenic	ENSEMBL
p9495	2.20819e-09	6.45667e-06	1	4.39025	4.39025	4.39025	4.39025	4.39025	4.39025	ENST00000597051.1	2	-	200758805	200773881	15076	3	ENSG00000232732.4	Intergenic	ENSEMBL
p9497	1.1937e-06	0.0208439	0.856854	199.224	106.928	268.218	193.798	66.1378	232.215	ENST00000600062.1	2	-	200759287	200761969	2682	2	ENSG00000232732.4	Intergenic	ENSEMBL
p9498	6.50406e-07	2.82665e-11	1	4.39025	4.39025	4.39025	4.39025	4.39025	4.39025	ENST00000594069.1	2	-	200759291	200774611	15320	3	ENSG00000232732.4	Intergenic	ENSEMBL
p9499	7.39008e-05	0.000128372	1.04045	65.4912	62.5568	96.3725	11.9516	90.5046	131.042	ENST00000593967.1	2	-	200773055	200773881	826	2	ENSG00000232732.4	Intergenic	ENSEMBL
p9501	0.405497	4.92769e-06	1	4.39025	4.39025	4.39025	4.39025	4.39025	4.39025	ENST00000598453.1	2	-	202008858	202015880	7022	5	ENSG00000226312.3	Antisense	ENSEMBL
p9502	0.21722	0.00720718	1	4.39025	4.39025	4.39025	4.39025	4.39025	4.39025	ENST00000594911.1	2	-	202008862	202015883	7021	7	ENSG00000226312.3	Antisense	ENSEMBL
p9503	8.91975e-07	5.59423e-11	1.52158	1091.14	1093.54	965.65	16.2439	1289.7	3487.55	ENST00000595372.1	2	-	202013596	202015883	2287	3	ENSG00000226312.3	Antisense	ENSEMBL
p9505	0.0513298	0.00277382	1.70129	1393.34	178.805	232.832	406.433	307.001	2357.36	ENST00000593896.1	2	-	202014578	202015883	1305	2	ENSG00000226312.3	Intronic	ENSEMBL
p9515	0.000383822	2.78852e-06	1	4.39025	4.39025	4.39025	4.39025	4.39025	4.39025	ENST00000428777.1	2	-	207985607	207986768	1161	2	ENSG00000237892.1	Intronic	ENSEMBL
p9518	0.0180975	6.68087e-06	1	4.39025	4.39025	4.39025	4.39025	4.39025	4.39025	ENST00000412387.1	2	-	208104844	208394519	289675	5	ENSG00000223725.2	Divergent	ENSEMBL
p9520	0.0112756	0.9301	0.567736	80.0281	87.7693	84.9076	22.5946	14.5763	106.299	ENST00000421964.1	2	-	208733305	208734639	1334	2	ENSG00000225111.1	Intronic	ENSEMBL
p9521	0.118215	2.56801e-05	1.05784	94.0608	109.098	28.8025	83.6288	109.08	52.6679	ENST00000415387.1	2	-	213446080	213886269	440189	5	ENSG00000225332.2	Antisense	ENSEMBL
p9526	9.39915e-06	6.02606e-06	1	4.39025	4.39025	4.39025	4.39025	4.39025	4.39025	ENST00000457625.2	2	-	216444129	216447358	3229	2	ENSG00000227981.2	Intergenic	ENSEMBL
p9537	9.62642e-11	8.79428e-11	1.32513	166.268	160.626	16.3641	27.3431	56.0723	371.446	ENST00000438978.1	2	-	217351493	217363469	11976	2	ENSG00000232485.2	Divergent	ENSEMBL
p9540	1.97215e-06	1.3797e-11	1	4.39025	4.39025	4.39025	4.39025	4.39025	4.39025	ENST00000421907.1	2	-	217731054	217732536	1482	2	ENSG00000237479.1	Intergenic	ENSEMBL
p9542	7.93907e-06	0.00155944	0.448218	66.7832	45.251	65.8569	26.5655	3.51675	49.6518	ENST00000411433.1	2	-	219191611	219222689	31078	4	ENSG00000237281.1	Antisense	ENSEMBL
p9545	1.26296e-10	4.04188e-12	2.32596	5563.94	2131.62	551.877	4357.26	4571.93	10254.1	ENST00000431827.1	2	-	220289792	220290906	1114	2	ENSG00000234638.1	Antisense	ENSEMBL
p9548	0.00336995	0.00530759	1	4.39025	4.39025	4.39025	4.39025	4.39025	4.39025	ENST00000596829.1	2	-	220411932	220412380	448	1	ENSG00000268896.1	Antisense	ENSEMBL
p9549	9.9542e-11	6.79846e-06	1.37698	650.224	405.932	523.62	28.1135	729.138	1418.07	ENST00000455896.1	2	-	220489780	220491415	1635	2	ENSG00000228973.1	Divergent	ENSEMBL
p9551	2.75215e-10	0.000130719	1	4.39025	4.39025	4.39025	4.39025	4.39025	4.39025	ENST00000587099.1	2	-	223181960	223183372	1412	1	ENSG00000267034.1	Intergenic	ENSEMBL
p9556	3.81601e-08	0.00835406	1	4.39025	4.39025	4.39025	4.39025	4.39025	4.39025	ENST00000439598.2	2	-	228085767	228189880	104113	14	ENSG00000236432.2	Antisense	ENSEMBL
p9562	6.8296e-05	3.778e-09	0.595389	61.9772	98.452	93.5541	49.5993	69.2852	32.3344	ENST00000442062.1	2	-	229548252	229549296	1044	2	ENSG00000228226.1	Intergenic	ENSEMBL
p9565	0.000681949	0.0402495	0.584721	1065.33	1045.59	1216.94	233.381	248.903	1463.58	ENST00000415174.1	2	-	231555635	231565244	9609	4	ENSG00000226125.1	Intergenic	ENSEMBL
p9566	3.18832e-05	0.194159	0.762232	109.39	159.567	169.058	32.7127	179.773	121.383	ENST00000414876.1	2	-	231849082	231860746	11664	6	ENSG00000238062.1	Divergent	ENSEMBL
p9575	2.93016e-10	1.03517e-06	1.55643	301.008	166.828	53.2806	45.9679	42.1287	722.983	ENST00000441266.1	2	-	233244344	233246384	2040	3	ENSG00000224516.1	Antisense	ENSEMBL
p9580	0.580724	0.000339266	1	4.39025	4.39025	4.39025	4.39025	4.39025	4.39025	ENST00000600482.1	2	-	233449023	233460646	11623	2	ENSG00000237126.2	Divergent	ENSEMBL
p9582	9.6268e-11	5.75568e-05	0.759772	46.2083	59.0192	76.5079	25.5168	13.815	98.7456	ENST00000596622.1	2	-	233460476	233476681	16205	4	ENSG00000237126.2	Antisense	ENSEMBL
p9585	8.5784e-07	0.00911873	1	4.39025	4.39025	4.39025	4.39025	4.39025	4.39025	ENST00000439336.1	2	-	234602079	234617345	15266	2	ENSG00000224814.1	Intronic	ENSEMBL
p9588	0.000174403	0.0173711	1	4.39025	4.39025	4.39025	4.39025	4.39025	4.39025	ENST00000413842.1	2	-	235790922	235797446	6524	4	ENSG00000235726.1	Intergenic	ENSEMBL
p9589	7.12348e-08	0.00016062	0.945556	227.332	229.611	198.944	216.078	36.0931	368.007	ENST00000434572.1	2	-	235796012	235797170	1158	2	ENSG00000235726.1	Intergenic	ENSEMBL
p9591	4.23764e-13	0.35014	1	4.39025	4.39025	4.39025	4.39025	4.39025	4.39025	ENST00000418430.1	2	-	237968076	237994460	26384	2	ENSG00000227252.1	Antisense	ENSEMBL
p9595	2.2173e-07	0.437451	1	4.39025	4.39025	4.39025	4.39025	4.39025	4.39025	ENST00000447880.1	2	-	239335717	239336370	653	2	ENSG00000229915.1	Antisense	ENSEMBL
p9600	1.11502e-10	0.575658	0.62224	50.3725	87.6949	64.6592	5.81139	92.1065	28.2267	ENST00000457178.1	2	-	241166976	241195452	28476	3	ENSG00000227479.1	Intergenic	ENSEMBL
p9602	0.0591536	0.00106254	1.51108	97.7559	15.1965	167.857	193.651	197.41	33.2643	ENST00000418218.1	2	-	241894033	241906868	12835	9	ENSG00000233392.1	Intergenic	ENSEMBL
p9603	0.0862467	2.88937e-08	1	4.39025	4.39025	4.39025	4.39025	4.39025	4.39025	ENST00000457369.1	2	-	241894440	241898771	4331	5	ENSG00000233392.1	Intergenic	ENSEMBL
p9606	4.04328e-07	0.0377953	1	4.39025	4.39025	4.39025	4.39025	4.39025	4.39025	ENST00000425183.1	2	-	241949461	241950161	700	2	ENSG00000229996.1	Intronic	ENSEMBL
p9607	0.000344241	0.00270992	1.13395	6542.85	3784.46	1049.81	1732.11	2747.73	8421.27	ENST00000458377.1	2	-	241955015	242003533	48518	3	ENSG00000225521.1	Antisense	ENSEMBL
p9611	0.000236824	0.00060098	0.955196	340.269	289.972	393.877	12.6384	495.708	469.887	ENST00000417267.1	2	-	242694207	242695155	948	2	ENSG00000234793.1	Intronic	ENSEMBL
p9613	0.0265617	0.102956	1	4.39025	4.39025	4.39025	4.39025	4.39025	4.39025	ENST00000413820.1	2	-	242749406	242751732	2326	2	ENSG00000224272.2	Antisense	ENSEMBL
p9614	4.48927e-06	3.1465e-13	0.930495	81.0363	46.519	43.6239	63.8651	6.43314	88.9832	ENST00000439270.1	2	-	242750204	242751718	1514	3	ENSG00000224272.2	Antisense	ENSEMBL
p9618	1.0216e-06	1.50022e-12	0.563827	106.72	89.3736	128.018	1.28044	52.6438	128.819	ENST00000567549.1	2	-	243029504	243030608	1104	1	ENSG00000261186.1	Intergenic	ENSEMBL
p9619	1.63825e-09	0.00484753	0.69659	199.568	123.932	289.847	58.0135	94.1957	275.042	ENST00000437798.1	2	+	197568	202605	5037	2	ENSG00000227061.1	Intergenic	ENSEMBL
p9621	0.000167266	7.36458e-10	1	4.39025	4.39025	4.39025	4.39025	4.39025	4.39025	ENST00000427831.1	2	+	286566	301515	14949	4	ENSG00000228643.1	Antisense	ENSEMBL
p9625	2.73714e-10	2.72167e-14	1.44755	98.7673	118.094	113.596	167.808	181.293	129.251	ENST00000449119.1	2	+	421056	422156	1100	2	ENSG00000226277.1	Intergenic	ENSEMBL
p9630	0.0904683	0.331681	1	4.39025	4.39025	4.39025	4.39025	4.39025	4.39025	ENST00000435573.1	2	+	680080	697371	17291	3	ENSG00000233296.1	Intergenic	ENSEMBL
p9631	1.56826e-05	7.69731e-10	1	4.39025	4.39025	4.39025	4.39025	4.39025	4.39025	ENST00000431542.1	2	+	741976	749856	7880	2	ENSG00000231173.1	Intergenic	ENSEMBL
p9634	0.00261481	2.26426e-05	1	4.39025	4.39025	4.39025	4.39025	4.39025	4.39025	ENST00000454530.1	2	+	3160526	3161568	1042	3	ENSG00000226649.1	Intergenic	ENSEMBL
p9639	1.04651e-10	1.51592e-05	1	4.39025	4.39025	4.39025	4.39025	4.39025	4.39025	ENST00000456327.1	2	+	6072818	6120819	48001	5	ENSG00000232044.3	Intergenic	ENSEMBL
p9645	0.350009	3.17203e-09	0.799202	74.1029	80.0479	68.5962	98.6102	61.4427	17.967	ENST00000419713.1	2	+	7561401	7590385	28984	6	ENSG00000229727.2	Intergenic	ENSEMBL
p9647	0.0230179	0.0799816	1	4.39025	4.39025	4.39025	4.39025	4.39025	4.39025	ENST00000450695.1	2	+	7561422	7562966	1544	3	ENSG00000229727.2	Intergenic	ENSEMBL
p9650	0.00836698	5.28655e-11	1	4.39025	4.39025	4.39025	4.39025	4.39025	4.39025	ENST00000442864.1	2	+	8279531	8283399	3868	2	ENSG00000229740.1	Intergenic	ENSEMBL
p9651	0.00772281	0.185952	0.783357	100.119	162.735	128.754	71.1375	131.882	103.749	ENST00000495580.1	2	+	9243568	9244710	1142	3	ENSG00000242136.1	Intergenic	ENSEMBL
p9659	6.26701e-09	3.02007e-10	1	4.39025	4.39025	4.39025	4.39025	4.39025	4.39025	ENST00000483023.1	2	+	9814151	9848542	34391	5	ENSG00000244260.1	Intergenic	ENSEMBL
p9663	0.101805	0.273004	1	4.39025	4.39025	4.39025	4.39025	4.39025	4.39025	ENST00000404616.2	2	+	10592444	10595678	3234	4	ENSG00000217258.2	Intergenic	ENSEMBL
p9664	0.00151214	6.75019e-05	0.810418	303.599	198.414	135.142	58.3282	133.709	324.324	ENST00000414538.1	2	+	10729291	10744956	15665	4	ENSG00000234818.1	Antisense	ENSEMBL
p9668	9.63068e-11	0.00105852	1	4.39025	4.39025	4.39025	4.39025	4.39025	4.39025	ENST00000453100.1	2	+	11539179	11542384	3205	2	ENSG00000224177.2	Intergenic	ENSEMBL
p9675	0.00370732	1.63335e-07	1	4.39025	4.39025	4.39025	4.39025	4.39025	4.39025	ENST00000412606.1	2	+	12454442	12701391	246949	4	ENSG00000224184.1	Intergenic	ENSEMBL
p9676	0.157652	5.11469e-05	0.622125	304.912	324.459	366.208	211.378	52.0398	355.956	ENST00000414086.1	2	+	12739112	12745271	6159	4	ENSG00000223360.1	Intergenic	ENSEMBL
p9684	3.15536e-13	1.04412e-07	1	4.39025	4.39025	4.39025	4.39025	4.39025	4.39025	ENST00000442387.2	2	+	16213519	16221239	7720	3	ENSG00000236289.2	Intergenic	ENSEMBL
p9689	2.18931e-10	0.0196822	1	4.39025	4.39025	4.39025	4.39025	4.39025	4.39025	ENST00000431697.1	2	+	18966072	18969018	2946	2	ENSG00000224626.1	Intergenic	ENSEMBL
p9693	4.54065e-09	0.0224062	1	4.39025	4.39025	4.39025	4.39025	4.39025	4.39025	ENST00000456119.1	2	+	20068651	20072291	3640	5	ENSG00000228784.1	Intergenic	ENSEMBL
p9695	7.03931e-10	1.0143e-09	1	4.39025	4.39025	4.39025	4.39025	4.39025	4.39025	ENST00000452342.2	2	+	20251894	20254257	2363	2	ENSG00000223734.2	Divergent	ENSEMBL
p9696	0.0322187	0.00217224	1.13279	74.0157	56.7638	11.2687	84.9273	12.3437	63.6395	ENST00000448241.1	2	+	20650802	20652708	1906	2	ENSG00000228950.1	Intergenic	ENSEMBL
p9702	9.05522e-08	1.10474e-05	1.01544	64.6365	62.5022	58.8568	46.1131	82.3092	60.4456	ENST00000451511.1	2	+	21618947	21626046	7099	2	ENSG00000231204.1	Intergenic	ENSEMBL
p9703	0.898017	0.0505244	1	4.39025	4.39025	4.39025	4.39025	4.39025	4.39025	ENST00000417609.1	2	+	21619454	21626046	6592	2	ENSG00000231204.1	Intergenic	ENSEMBL
p9707	3.25077e-08	0.820221	1	4.39025	4.39025	4.39025	4.39025	4.39025	4.39025	ENST00000413254.1	2	+	24437249	24439163	1914	2	ENSG00000242628.1	Antisense	ENSEMBL
p9710	0.128663	0.00171312	0.969456	203.158	260.931	131.535	202.092	255.933	119.406	ENST00000434897.1	2	+	25194994	25262563	67569	3	ENSG00000224165.1	Divergent	ENSEMBL
p9712	0.127034	0.443969	1.36021	415.044	426.75	342.388	677.475	571.875	361.387	ENST00000421842.1	2	+	25195051	25195699	648	2	ENSG00000224165.1	Divergent	ENSEMBL
p9715	0.000210456	1.4049e-06	2.97148	138.049	6.14069	28.5007	198.953	168.927	145.266	ENST00000411862.1	2	+	27283905	27284683	778	2	ENSG00000229122.1	Intronic	ENSEMBL
p9727	0.000176475	1.99891e-06	0.940163	84.5628	48.8556	99.5206	94.1555	5.63153	119.214	ENST00000424364.2	2	+	33066080	33127190	61110	6	ENSG00000230876.2	Intergenic	ENSEMBL
p9732	1.58699e-06	4.26259e-07	1.49139	92.7713	101.416	74.2395	127.942	184.175	88.2119	ENST00000422558.1	2	+	34608854	34860407	251553	3	ENSG00000226785.1	Intergenic	ENSEMBL
p9738	4.20332e-10	0.0023641	1	4.39025	4.39025	4.39025	4.39025	4.39025	4.39025	ENST00000585391.1	2	+	35056444	35389031	332587	6	ENSG00000226994.2	Intergenic	ENSEMBL
p9740	8.39783e-05	2.21189e-05	1	4.39025	4.39025	4.39025	4.39025	4.39025	4.39025	ENST00000587791.1	2	+	35093460	35399975	306515	5	ENSG00000226994.2	Intergenic	ENSEMBL
p9741	2.2176e-07	0.457692	1.97507	314.509	138.736	154.474	201.491	453.857	544.943	ENST00000587255.1	2	+	35384664	35395415	10751	5	ENSG00000226994.2	Intergenic	ENSEMBL
p9743	2.77777e-08	0.00106814	1.02079	1066.96	1414.43	383.891	1027.42	1155.27	742.148	ENST00000438935.2	2	+	37440609	37443336	2727	3	ENSG00000243788.2	Antisense	ENSEMBL
p9745	7.32451e-06	0.000126565	1	4.39025	4.39025	4.39025	4.39025	4.39025	4.39025	ENST00000419425.1	2	+	37827278	37873841	46563	5	ENSG00000236213.1	Antisense	ENSEMBL
p9754	0.0923069	1.97023e-10	1	4.39025	4.39025	4.39025	4.39025	4.39025	4.39025	ENST00000443038.1	2	+	39664509	39743909	79400	2	ENSG00000231312.2	Divergent	ENSEMBL
p9756	6.2712e-05	4.18515e-09	1	4.39025	4.39025	4.39025	4.39025	4.39025	4.39025	ENST00000445520.1	2	+	39664571	39701899	37328	4	ENSG00000231312.2	Divergent	ENSEMBL
p9764	1.08684e-06	7.23255e-05	1.66532	216.35	17.8851	102.466	111.33	64.7331	384.653	ENST00000439606.1	2	+	40269489	40332562	63073	4	ENSG00000227028.2	Intergenic	ENSEMBL
p9767	0.549788	7.99948e-10	1	4.39025	4.39025	4.39025	4.39025	4.39025	4.39025	ENST00000435515.1	2	+	40342168	40481718	139550	4	ENSG00000227028.2	Antisense	ENSEMBL
p9768	0.952468	9.65084e-05	1	4.39025	4.39025	4.39025	4.39025	4.39025	4.39025	ENST00000427354.1	2	+	40437104	40482198	45094	3	ENSG00000227028.2	Intronic	ENSEMBL
p9769	0.9103	0.801209	1.17752	672.791	533.527	865.86	114.541	575.879	1749.62	ENST00000413479.1	2	+	40447282	40481903	34621	4	ENSG00000227028.2	Intronic	ENSEMBL
p9770	0.725874	0.0167619	1	4.39025	4.39025	4.39025	4.39025	4.39025	4.39025	ENST00000417875.1	2	+	40478562	40481686	3124	3	ENSG00000227028.2	Intronic	ENSEMBL
p9771	9.25745e-08	0.00214983	0.712442	59.2981	68.1351	80.1295	5.62575	65.4923	76.7583	ENST00000420187.1	2	+	40973626	40994592	20966	4	ENSG00000233128.1	Intergenic	ENSEMBL
p9772	1.13367e-10	1.96721e-09	0.669172	11976.6	1766.84	3669.91	1051.63	3244.15	7356.78	ENST00000431359.1	2	+	41370919	41383954	13035	3	ENSG00000241522.1	Intergenic	ENSEMBL
p9773	4.21308e-07	0.00026685	0.922566	95.0477	3.54387	175.355	132.565	32.4225	87.7463	ENST00000418836.2	2	+	42104213	42105095	882	2	ENSG00000214691.6	Intergenic	ENSEMBL
p9783	1.49069e-10	1.09373e-05	1	4.39025	4.39025	4.39025	4.39025	4.39025	4.39025	ENST00000439182.2	2	+	47754909	47762338	7429	2	ENSG00000235760.3	Intronic	ENSEMBL
p9785	0.0389527	0.883304	0.604589	66.962	53.293	88.8695	45.2786	56.0972	25.0586	ENST00000432064.1	2	+	48132816	48134774	1958	2	ENSG00000233230.1	Antisense	ENSEMBL
p9792	1.38495e-10	5.34553e-15	1.35073	612.217	822.813	387.328	355.719	264.148	1841.66	ENST00000422521.2	2	+	54198244	54293184	94940	5	ENSG00000239235.3	Divergent	ENSEMBL
p9793	7.10403e-06	0.00268404	1.39857	103.213	32.3957	168.182	183.444	111.478	129.952	ENST00000366287.4	2	+	55535627	55541797	6170	2	ENSG00000240401.3	Antisense	ENSEMBL
p9794	0.890985	0.000396192	1	4.39025	4.39025	4.39025	4.39025	4.39025	4.39025	ENST00000599475.1	2	+	55541217	55567446	26229	2	ENSG00000240401.3	Antisense	ENSEMBL
p9798	2.44763e-06	1.78707e-07	1	4.39025	4.39025	4.39025	4.39025	4.39025	4.39025	ENST00000452840.1	2	+	58655472	59290901	635429	12	ENSG00000233723.3	Intergenic	ENSEMBL
p9800	1.93614e-09	0.0198151	1	4.39025	4.39025	4.39025	4.39025	4.39025	4.39025	ENST00000449448.2	2	+	58655519	59231127	575608	5	ENSG00000233723.3	Intergenic	ENSEMBL
p9806	6.02147e-08	1.12564e-06	1.11014	3926.26	741.538	3255.49	1573.56	3729.79	3492.57	ENST00000589496.1	2	+	61153043	61155287	2244	1	ENSG00000267520.1	Intergenic	ENSEMBL
p9807	0.000254893	0.00113332	1	4.39025	4.39025	4.39025	4.39025	4.39025	4.39025	ENST00000425779.1	2	+	62095566	62113217	17651	2	ENSG00000236498.1	Antisense	ENSEMBL
p9808	3.50671e-05	0.00929605	1	4.39025	4.39025	4.39025	4.39025	4.39025	4.39025	ENST00000416845.1	2	+	62690261	62691205	944	2	ENSG00000228541.1	Intergenic	ENSEMBL
p9809	2.14813e-06	5.96086e-06	1	4.39025	4.39025	4.39025	4.39025	4.39025	4.39025	ENST00000438115.1	2	+	64370372	64456739	86367	5	ENSG00000225889.2	Antisense	ENSEMBL
p9810	3.01782e-05	1.19876e-10	1.33333	6767.13	2101.73	1782.43	4598.71	3723.83	5879.11	ENST00000413030.2	2	+	64434108	64478489	44381	4	ENSG00000225889.2	Intergenic	ENSEMBL
p9813	1.81936e-07	0.190821	1	4.39025	4.39025	4.39025	4.39025	4.39025	4.39025	ENST00000436950.1	2	+	64455586	64475672	20086	4	ENSG00000225889.2	Intergenic	ENSEMBL
p9814	0.0279734	2.70462e-05	0.836947	4456.54	995.002	3277.67	2905.46	794.719	3605.71	ENST00000451350.1	2	+	64455601	64479993	24392	4	ENSG00000225889.2	Intergenic	ENSEMBL
p9825	0.000113693	0.933916	0.787687	58.1087	42.563	20.9352	37.7927	31.6896	26.3058	ENST00000449673.1	2	+	66554492	66556116	1624	3	ENSG00000225815.2	Intergenic	ENSEMBL
p9836	8.27077e-10	0.000161745	1.50388	399.619	366.011	428.037	690.766	484.877	619.489	ENST00000594329.1	2	+	67314144	67485098	170954	6	ENSG00000230906.2	Intergenic	ENSEMBL
p9845	0.276333	0.0958899	1	4.39025	4.39025	4.39025	4.39025	4.39025	4.39025	ENST00000418066.2	2	+	69871556	70008692	137136	4	ENSG00000234198.2	Antisense	ENSEMBL
p9847	0.018468	8.43251e-15	2.16424	284.261	130.339	87.3478	458.851	328.038	299.447	ENST00000445084.1	2	+	70528582	70529204	622	2	ENSG00000233849.1	Antisense	ENSEMBL
p9848	0.000862087	0.387193	1.17161	74.9242	9.62749	92.3813	71.9636	88.6207	46.7121	ENST00000452525.1	2	+	70630065	70649810	19745	4	ENSG00000229229.1	Intergenic	ENSEMBL
p9852	6.57775e-05	7.2406e-11	1	4.39025	4.39025	4.39025	4.39025	4.39025	4.39025	ENST00000441587.2	2	+	73683890	73686611	2721	2	ENSG00000230002.2	Intronic	ENSEMBL
p9853	0.299183	0.000109995	1	4.39025	4.39025	4.39025	4.39025	4.39025	4.39025	ENST00000441217.1	2	+	74212258	74213470	1212	2	ENSG00000235499.1	Intergenic	ENSEMBL
p9856	2.3759e-14	0.000986994	2.18209	307.518	151.579	220.829	389.35	488.438	605.875	ENST00000418990.1	2	+	74612622	74618554	5932	2	ENSG00000237737.1	Intronic	ENSEMBL
p9857	3.959e-07	0.13813	1.36198	98.8436	23.5596	38.0341	108.952	23.5061	86.0545	ENST00000427343.1	2	+	74612629	74619360	6731	3	ENSG00000237737.1	Antisense	ENSEMBL
p9859	1.90969e-08	0.000102367	1	4.39025	4.39025	4.39025	4.39025	4.39025	4.39025	ENST00000548978.2	2	+	74729721	74731805	2084	2	ENSG00000257702.2	Antisense	ENSEMBL
p9870	4.0471e-10	0.230722	1	4.39025	4.39025	4.39025	4.39025	4.39025	4.39025	ENST00000448431.1	2	+	83749937	83750626	689	2	ENSG00000232548.1	Intergenic	ENSEMBL
p9873	2.99615e-08	0.0050741	1	4.39025	4.39025	4.39025	4.39025	4.39025	4.39025	ENST00000366278.2	2	+	86042252	86052514	10262	3	ENSG00000229498.1	Intergenic	ENSEMBL
p9874	9.686e-11	3.68335e-07	1	4.39025	4.39025	4.39025	4.39025	4.39025	4.39025	ENST00000455121.3	2	+	86116402	86118103	1701	2	ENSG00000232504.4	Divergent	ENSEMBL
p9876	0.000128346	5.12282e-08	0.837055	61.7614	80.0083	31.9004	71.3842	15.4296	58.5576	ENST00000439077.1	2	+	86789197	86844564	55367	3	ENSG00000228363.2	Intronic	ENSEMBL
p9892	0.000152164	0.253156	1	4.39025	4.39025	4.39025	4.39025	4.39025	4.39025	ENST00000458149.3	2	+	98286238	98319167	32929	9	ENSG00000228486.3	Intergenic	ENSEMBL
p9894	0.00149087	0.0516031	0.812197	342.934	135.617	350.504	145.265	159.387	368.704	ENST00000596529.1	2	+	98286255	98305456	19201	6	ENSG00000228486.3	Intergenic	ENSEMBL
p9897	1.56797e-09	0.15803	1.35116	216.589	205.245	10.8332	84.5193	152.342	347.741	ENST00000601499.1	2	+	98286255	98317674	31419	7	ENSG00000228486.3	Intergenic	ENSEMBL
p9899	0.000161133	3.38491e-10	0.743777	195.854	289.152	184.152	105.378	167.994	224.332	ENST00000599435.1	2	+	98286255	98319424	33169	6	ENSG00000228486.3	Intergenic	ENSEMBL
p9906	1.27533e-06	2.70428e-09	1.44517	137.736	62.9584	123.329	113.494	188.237	166.537	ENST00000594273.1	2	+	98290790	98311041	20251	5	ENSG00000228486.3	Intergenic	ENSEMBL
p9907	0.544505	0.000224809	1	4.39025	4.39025	4.39025	4.39025	4.39025	4.39025	ENST00000445382.2	2	+	98292283	98319487	27204	5	ENSG00000228486.3	Intergenic	ENSEMBL
p9909	0.139468	9.1629e-09	1.30188	93.6402	41.5871	182.812	162.199	191.95	59.8991	ENST00000596740.1	2	+	98310918	98319503	8585	4	ENSG00000228486.3	Intergenic	ENSEMBL
p9910	1.32843e-05	3.30738e-09	0.67533	169.979	194.202	174.153	51.217	143.777	168.559	ENST00000413274.1	2	+	98963457	98967603	4146	2	ENSG00000227987.1	Intronic	ENSEMBL
p9912	0.0987274	4.40621e-13	0.578859	64.1763	15.6512	83.1461	43.7786	24.3811	26.1791	ENST00000452354.1	2	+	100824715	100867946	43231	3	ENSG00000232084.1	Intergenic	ENSEMBL
p9914	9.09941e-05	0.0241469	0.766239	138.53	147.899	164.488	164.695	10.9295	169.886	ENST00000430586.1	2	+	101439122	101463682	24560	3	ENSG00000232034.1	Intronic	ENSEMBL
p9917	0.382768	0.00294508	0.837883	759.093	994.238	900.722	864.877	311.461	1047.45	ENST00000450893.1	2	+	103055172	103056935	1763	3	ENSG00000234389.1	Intronic	ENSEMBL
p9932	3.03455e-08	2.0401e-08	1	4.39025	4.39025	4.39025	4.39025	4.39025	4.39025	ENST00000452037.1	2	+	105760580	105761370	790	2	ENSG00000226508.1	Intergenic	ENSEMBL
p9933	1.35745e-09	2.24531e-06	1	4.39025	4.39025	4.39025	4.39025	4.39025	4.39025	ENST00000438148.1	2	+	105760599	105761882	1283	3	ENSG00000226508.1	Intergenic	ENSEMBL
p9940	8.86164e-10	4.12048e-11	1.10077	218.326	18.8842	222.515	38.589	156.635	310.828	ENST00000422203.2	2	+	107978737	108022716	43979	3	ENSG00000225588.2	Intergenic	ENSEMBL
p9946	0.965451	0.0934494	1.35728	4800.98	2491.22	3827.57	4528	4059.79	6504.86	ENST00000419650.1	2	+	108370600	108428804	58204	4	ENSG00000232991.1	Intergenic	ENSEMBL
p9951	9.66679e-11	2.22695e-05	1	4.39025	4.39025	4.39025	4.39025	4.39025	4.39025	ENST00000456683.2	2	+	111206818	111208641	1823	3	ENSG00000227574.2	Intergenic	ENSEMBL
p9953	2.00571e-08	0.29878	1	4.39025	4.39025	4.39025	4.39025	4.39025	4.39025	ENST00000438897.1	2	+	112022859	112037457	14598	2	ENSG00000229118.1	Intergenic	ENSEMBL
p9954	0.288884	1.91238e-07	1	4.39025	4.39025	4.39025	4.39025	4.39025	4.39025	ENST00000455309.1	2	+	112248849	112268567	19718	2	ENSG00000240350.1	Intergenic	ENSEMBL
p9956	9.62608e-11	0.0002661	1.98644	710.554	453.885	216.329	577.881	689.923	1475.01	ENST00000414784.1	2	+	113346616	113372008	25392	2	ENSG00000243389.1	Antisense	ENSEMBL
p9957	2.28574e-07	0.00572325	2.13856	205.931	1.80224	148.78	143.648	296.29	322.488	ENST00000436885.1	2	+	113348372	113349516	1144	2	ENSG00000228251.1	Intergenic	ENSEMBL
p9959	0.0679812	0.000315252	1.22052	311.139	246.337	149.889	147.953	349.585	365.818	ENST00000456685.1	2	+	113969098	113997267	28169	6	ENSG00000189223.8	Antisense	ENSEMBL
p9960	0.714168	0.0255876	1	4.39025	4.39025	4.39025	4.39025	4.39025	4.39025	ENST00000437551.1	2	+	113993103	113998402	5299	3	ENSG00000189223.8	Intronic	ENSEMBL
p9961	0.0274133	8.6411e-11	0.703744	227.755	139.615	168.434	69.3941	9.18057	298.495	ENST00000451179.1	2	+	113993106	114023747	30641	5	ENSG00000189223.8	Antisense	ENSEMBL
p9963	3.8254e-10	6.70177e-14	1	4.39025	4.39025	4.39025	4.39025	4.39025	4.39025	ENST00000431844.2	2	+	113993116	113993934	818	2	ENSG00000189223.8	Intronic	ENSEMBL
p9965	0.833821	2.8075e-10	1	4.39025	4.39025	4.39025	4.39025	4.39025	4.39025	ENST00000333145.5	2	+	113993116	114024581	31465	6	ENSG00000189223.8	Antisense	ENSEMBL
p9967	0.00020378	0.00137941	1	4.39025	4.39025	4.39025	4.39025	4.39025	4.39025	ENST00000553319.1	2	+	113998306	113998987	681	2	ENSG00000258395.1	Intronic	ENSEMBL
p9973	1.45864e-06	5.37322e-06	0.62518	87.2734	89.9759	65.8523	43.7448	20.5079	87.7295	ENST00000439955.1	2	+	118593925	118595780	1855	3	ENSG00000236255.1	Intergenic	ENSEMBL
p9975	4.83099e-07	0.0238002	0.826292	52.0139	42.6635	70.3403	70.7866	47.8921	17.674	ENST00000413179.1	2	+	118753185	118754186	1001	2	ENSG00000235066.2	Antisense	ENSEMBL
p9981	8.01469e-07	1.13034e-06	0.459719	87.999	67.4214	74.302	6.90891	32.6289	66.0699	ENST00000413602.1	2	+	120234023	120244922	10899	2	ENSG00000231013.1	Antisense	ENSEMBL
p9985	0.00282079	3.56769e-07	1	4.39025	4.39025	4.39025	4.39025	4.39025	4.39025	ENST00000577914.1	2	+	122287997	122290281	2284	2	ENSG00000265451.1	Intronic	ENSEMBL
p9987	0.953331	5.80959e-05	1.30118	196.767	154.967	170.199	214.289	244.248	220.59	ENST00000414554.1	2	+	122407225	122408257	1032	3	ENSG00000236859.1	Divergent	ENSEMBL
p9988	0.00243784	3.44274e-05	1.33955	125.269	119.373	67.6612	164.853	154.251	99.2421	ENST00000419902.1	2	+	122407675	122485784	78109	4	ENSG00000236859.1	Antisense	ENSEMBL
p9991	3.4337e-07	1.50219e-08	2.36717	118.728	15.2485	42.4856	196.056	78.2431	143.417	ENST00000435895.1	2	+	122548040	122553932	5892	5	ENSG00000224655.1	Intergenic	ENSEMBL
p11242	3.08685e-05	0.121413	1.52802	106.294	163.473	1.42106	172.838	124.957	116.586	ENST00000417612.1	3	-	405052	427478	22426	3	ENSG00000234661.1	Antisense	ENSEMBL
p11246	0.000104501	1.19013e-06	1	4.39025	4.39025	4.39025	4.39025	4.39025	4.39025	ENST00000420000.2	3	-	3292370	3668980	376610	5	ENSG00000223727.2	Intergenic	ENSEMBL
p11252	0.00707962	9.34248e-09	0.457749	99.28	2.64698	131.635	72.522	3.82676	30.5639	ENST00000441386.2	3	-	4940363	5021622	81259	3	ENSG00000235831.2	Antisense	ENSEMBL
p11253	4.41757e-09	1.49069e-13	1.54737	170.383	195.489	37.2388	36.7394	150.785	436.236	ENST00000439325.1	3	-	5198589	5229014	30425	4	ENSG00000233912.1	Antisense	ENSEMBL
p11261	3.26912e-05	0.826127	1.08365	62.5423	69.7125	52.1417	77.6946	84.9877	37.1397	ENST00000424366.1	3	-	6781224	6847114	65890	5	ENSG00000226258.2	Intergenic	ENSEMBL
p11268	4.37122e-06	0.290952	1.20444	102.343	32.4044	142.348	96.4467	106.347	130.952	ENST00000446281.1	3	-	7996325	8543284	546959	6	ENSG00000227110.2	Divergent	ENSEMBL
p11269	0.00342651	3.4922e-07	1	4.39025	4.39025	4.39025	4.39025	4.39025	4.39025	ENST00000420095.1	3	-	8262833	8543341	280508	4	ENSG00000227110.2	Divergent	ENSEMBL
p11271	5.79899e-10	1.06519e-07	1.47323	110.245	189.413	16.791	48.837	138.195	279.171	ENST00000439407.1	3	-	8540294	8653610	113316	4	ENSG00000227110.2	Antisense	ENSEMBL
p11275	0.431954	0.00590815	1.45373	101.764	97.5866	1.53303	182.152	33.5486	76.3297	ENST00000518331.1	3	-	9379285	9404987	25702	2	ENSG00000254485.1	Antisense	ENSEMBL
p11277	0.0648239	5.98058e-12	1.04725	165.878	165.289	64.5921	83.6532	178.242	152.564	ENST00000517687.1	3	-	9397455	9404662	7207	2	ENSG00000254485.1	Divergent	ENSEMBL
p11280	3.95438e-13	0.0202913	1.45664	3445.45	2754.99	685.862	217.386	3560.58	6252.89	ENST00000520629.1	3	-	9427505	9438307	10802	4	ENSG00000206573.4	Antisense	ENSEMBL
p11282	1.16792e-07	6.2162e-08	1.00292	297.765	8.7435	384.823	220.654	65.484	407.209	ENST00000521267.1	3	-	9431043	9438289	7246	4	ENSG00000206573.4	Intergenic	ENSEMBL
p11284	0.000128017	0.000663862	1	4.39025	4.39025	4.39025	4.39025	4.39025	4.39025	ENST00000522221.1	3	-	9431598	9433506	1908	2	ENSG00000206573.4	Intergenic	ENSEMBL
p11290	0.0282525	1.15885e-06	0.63805	111.56	174.01	105.862	99.5186	55.5824	94.6519	ENST00000602768.1	3	-	9854445	9854781	336	1	ENSG00000269886.1	Antisense	ENSEMBL
p11291	0.1596	0.0133199	1	4.39025	4.39025	4.39025	4.39025	4.39025	4.39025	ENST00000426698.1	3	-	10049986	10052798	2812	2	ENSG00000206567.5	Antisense	ENSEMBL
p11294	1.77183e-07	3.65128e-10	1.7233	117.392	0.661584	107.217	193.771	50.8754	143.563	ENST00000419591.1	3	-	10667705	10668492	787	2	ENSG00000224771.1	Intergenic	ENSEMBL
p11299	1.61991e-07	1.32154e-05	0.855699	114.9	113.873	15.6904	69.0476	7.34962	132.79	ENST00000424112.2	3	-	13518481	13521553	3072	2	ENSG00000244502.2	Divergent	ENSEMBL
p11300	9.88206e-13	0.425744	1	4.39025	4.39025	4.39025	4.39025	4.39025	4.39025	ENST00000525575.1	3	-	14313872	14345345	31473	2	ENSG00000255021.1	Intergenic	ENSEMBL
p11301	4.72252e-08	8.84662e-11	1	4.39025	4.39025	4.39025	4.39025	4.39025	4.39025	ENST00000502417.1	3	-	14389950	14394068	4118	3	ENSG00000251576.1	Intergenic	ENSEMBL
p11307	0.000108065	0.0171733	1	4.39025	4.39025	4.39025	4.39025	4.39025	4.39025	ENST00000597949.1	3	-	15477677	15482073	4396	3	ENSG00000249786.2	Antisense	ENSEMBL
p11311	9.62721e-11	0.0217213	1	4.39025	4.39025	4.39025	4.39025	4.39025	4.39025	ENST00000593876.1	3	-	15480705	15484984	4279	3	ENSG00000249786.2	Antisense	ENSEMBL
p11312	4.17938e-08	0.116835	0.669624	671.491	288.625	85.7781	177.603	14.0241	508.729	ENST00000594820.1	3	-	15480705	15485576	4871	3	ENSG00000249786.2	Antisense	ENSEMBL
p11318	6.39263e-06	1.30393e-11	1.97749	102.64	48.4091	95.9082	170.176	191.616	126.564	ENST00000432505.1	3	-	24141464	24144729	3265	2	ENSG00000224074.3	Intergenic	ENSEMBL
p11323	1.97648e-06	8.48854e-06	1	4.39025	4.39025	4.39025	4.39025	4.39025	4.39025	ENST00000437506.1	3	-	28039034	28070094	31060	3	ENSG00000235493.1	Intergenic	ENSEMBL
p11335	7.2155e-10	3.67354e-11	1.10072	2829.56	4545.85	2390.46	753.966	4454.09	5541.45	ENST00000438136.1	3	-	37795179	37903229	108050	4	ENSG00000235257.3	Antisense	ENSEMBL
p11336	4.88856e-06	2.88859e-13	1	4.39025	4.39025	4.39025	4.39025	4.39025	4.39025	ENST00000450990.1	3	-	37832241	37903239	70998	5	ENSG00000235257.3	Antisense	ENSEMBL
p11337	0.00562765	3.28718e-07	1	4.39025	4.39025	4.39025	4.39025	4.39025	4.39025	ENST00000420870.1	3	-	37832355	37903265	70910	6	ENSG00000235257.3	Antisense	ENSEMBL
p11342	1.38979e-08	0.694149	1.5841	110.475	97.5796	124.198	199.591	197.715	129.016	ENST00000441531.1	3	-	38492517	38496311	3794	2	ENSG00000229589.1	Antisense	ENSEMBL
p11343	1.39316e-09	0.000197546	1	4.39025	4.39025	4.39025	4.39025	4.39025	4.39025	ENST00000439293.1	3	-	40355292	40494677	139385	3	ENSG00000223797.1	Antisense	ENSEMBL
p11344	0.000454469	9.67443e-06	1	4.39025	4.39025	4.39025	4.39025	4.39025	4.39025	ENST00000425156.1	3	-	40432441	40494796	62355	4	ENSG00000223797.1	Antisense	ENSEMBL
p11352	7.68473e-10	3.64566e-09	3.3339	111.782	31.8238	21.1744	107.644	149.25	292.467	ENST00000593621.1	3	-	42555096	42573554	18458	7	ENSG00000232354.2	Antisense	ENSEMBL
p11357	0.00943757	0.557515	1	4.39025	4.39025	4.39025	4.39025	4.39025	4.39025	ENST00000449063.1	3	-	42846695	42893920	47225	2	ENSG00000235288.1	Antisense	ENSEMBL
p11361	0.00351365	4.91098e-06	0.790041	983.351	144.802	569.007	133.322	99.4856	1108.02	ENST00000416124.1	3	-	44462618	44465499	2881	2	ENSG00000225873.1	Intergenic	ENSEMBL
p11369	1.14726e-10	0.463991	2.22574	136.295	31.1302	21.8141	169.066	14.2322	237.898	ENST00000398957.1	3	-	47643204	47646167	2963	2	ENSG00000214773.1	Intronic	ENSEMBL
p11371	3.60994e-12	0.000486604	1.88791	3621.44	3126.88	409.347	3091.56	3269.87	7151.58	ENST00000435578.1	3	-	48482188	48488060	5872	3	ENSG00000244380.1	Antisense	ENSEMBL
p11374	1.66043e-05	1.28043e-12	0.406904	655.417	692.828	782.283	121.53	173.237	572.152	ENST00000452042.1	3	-	49022481	49027421	4940	2	ENSG00000223343.1	Antisense	ENSEMBL
p11378	7.07439e-14	1.57624e-06	1	4.39025	4.39025	4.39025	4.39025	4.39025	4.39025	ENST00000563780.1	3	-	49721912	49722416	504	2	ENSG00000259970.1	Antisense	ENSEMBL
p11380	2.28091e-08	1.00067e-07	1	4.39025	4.39025	4.39025	4.39025	4.39025	4.39025	ENST00000425674.1	3	-	50155597	50193453	37856	2	ENSG00000235016.1	Antisense	ENSEMBL
p11382	1.11567e-09	4.47212e-06	1.10797	138.799	87.8276	133.31	152.117	80.0747	166.609	ENST00000481576.1	3	-	52322595	52323292	697	1	ENSG00000242797.1	Intronic	ENSEMBL
p11383	4.73859e-11	0.00495257	1.35338	199.443	205.33	181.467	234.742	270.479	288.187	ENST00000493616.1	3	-	52322598	52333040	10442	3	ENSG00000242797.1	Antisense	ENSEMBL
p11385	1.13413e-05	9.31605e-07	0.973647	1011.03	1331.28	283.469	293	892.921	1370.66	ENST00000472761.1	3	-	52330672	52332930	2258	2	ENSG00000242797.1	Intergenic	ENSEMBL
p11386	6.08603e-08	0.00017048	1	4.39025	4.39025	4.39025	4.39025	4.39025	4.39025	ENST00000560076.1	3	-	53338286	53381570	43284	7	ENSG00000162290.11	Antisense	ENSEMBL
p11393	3.95145e-10	2.08156e-09	0.851294	733.867	643.125	620.497	443.52	878.917	378.013	ENST00000488720.1	3	-	58148273	58156363	8090	2	ENSG00000244161.1	Antisense	ENSEMBL
p11396	2.62436e-07	0.0012805	1	4.39025	4.39025	4.39025	4.39025	4.39025	4.39025	ENST00000486137.1	3	-	59450055	59496404	46349	2	ENSG00000242545.1	Intergenic	ENSEMBL
p11404	0.00127792	0.0764725	0.68112	169.157	184.092	155.853	73.3373	66.598	206.824	ENST00000485805.1	3	-	64064036	64073039	9003	4	ENSG00000189196.4	Intergenic	ENSEMBL
p11405	6.60468e-13	2.40349e-07	1	4.39025	4.39025	4.39025	4.39025	4.39025	4.39025	ENST00000485770.1	3	-	64430157	64431152	995	2	ENSG00000243993.1	Intergenic	ENSEMBL
p11410	2.49981e-08	0.00102052	1.63794	313.26	337.671	394.684	158.997	420.552	1133.11	ENST00000498714.1	3	-	71619405	71623608	4203	2	ENSG00000242094.1	Intronic	ENSEMBL
p11416	0.868679	2.80259e-07	1.6279	396.118	727.35	128.678	594.062	656.159	788.142	ENST00000464271.1	3	-	72110083	72149606	39523	3	ENSG00000241163.2	Intergenic	ENSEMBL
p11417	2.30608e-07	0.116147	1.97034	227.389	75.0113	218.002	84.8118	205.243	735.317	ENST00000462492.1	3	-	72141579	72150020	8441	3	ENSG00000241163.2	Intergenic	ENSEMBL
p11437	1.10167e-05	2.53614e-06	1	4.39025	4.39025	4.39025	4.39025	4.39025	4.39025	ENST00000490324.2	3	-	101542636	101543842	1206	2	ENSG00000249474.1	Antisense	ENSEMBL
p11440	4.73417e-09	4.49387e-11	0.950575	124.688	158.266	198.968	99.7277	190.434	167.941	ENST00000477210.1	3	-	106828787	106959485	130698	4	ENSG00000242759.1	Intergenic	ENSEMBL
p11444	3.7875e-06	1.62267e-05	1	4.39025	4.39025	4.39025	4.39025	4.39025	4.39025	ENST00000599431.1	3	-	106991476	107099497	108021	3	ENSG00000239828.2	Antisense	ENSEMBL
p11463	5.41261e-08	0.0192948	0.649897	40.9001	87.7585	50.7797	51.9064	17.1621	47.5479	ENST00000474711.1	3	-	110246328	110248429	2101	4	ENSG00000240895.1	Intergenic	ENSEMBL
p11474	5.61614e-08	0.000274629	1	4.39025	4.39025	4.39025	4.39025	4.39025	4.39025	ENST00000490139.1	3	-	112861196	112886666	25470	4	ENSG00000243795.1	Intergenic	ENSEMBL
p11476	0.79831	0.00012793	1	4.39025	4.39025	4.39025	4.39025	4.39025	4.39025	ENST00000570269.1	3	-	114033347	114035026	1679	1	ENSG00000259976.1	Intergenic	ENSEMBL
p11478	0.00245023	8.89153e-12	0.629453	74.3003	30.9371	98.0144	43.2199	30.2966	54.421	ENST00000462528.1	3	-	117401760	117407708	5948	2	ENSG00000241213.1	Intergenic	ENSEMBL
p11482	9.19216e-09	2.5415e-10	1	4.39025	4.39025	4.39025	4.39025	4.39025	4.39025	ENST00000466292.1	3	-	119033139	119041607	8468	2	ENSG00000241155.1	Intronic	ENSEMBL
p11485	1.03224e-09	2.30616e-10	1.53279	408.509	252.411	795.441	359.476	702.264	1170.55	ENST00000601985.1	3	-	125546080	125592691	46611	4	ENSG00000241288.2	Intergenic	ENSEMBL
p11488	1.69792e-09	0.0167451	1.08535	113.205	88.4782	56.8659	25.322	7.48917	247.806	ENST00000599176.1	3	-	125579509	125581916	2407	2	ENSG00000241288.2	Intergenic	ENSEMBL
p11489	9.71576e-11	7.22238e-12	1	4.39025	4.39025	4.39025	4.39025	4.39025	4.39025	ENST00000600280.1	3	-	125579657	125581916	2259	3	ENSG00000241288.2	Intergenic	ENSEMBL
p11494	0.000421728	6.8756e-08	1.35195	992.139	942.706	450.539	500.578	844.891	1879.45	ENST00000567253.1	3	-	128578558	128579369	811	1	ENSG00000261159.1	Intergenic	ENSEMBL
p11495	0.000309892	8.26386e-06	1	4.39025	4.39025	4.39025	4.39025	4.39025	4.39025	ENST00000498297.1	3	-	128580155	128590383	10228	5	ENSG00000231305.3	Intergenic	ENSEMBL
p11504	1.59936e-05	6.80971e-06	2.81521	211.804	80.8017	94.2675	43.9103	282.472	762.749	ENST00000441345.2	3	-	131048931	131080441	31510	2	ENSG00000250608.1	Antisense	ENSEMBL
p11506	1.59131e-08	1.67271e-05	1.06736	88.936	89.5842	36.1546	68.0518	45.103	115.981	ENST00000505219.1	3	-	131197940	131198077	137	1	ENSG00000249020.1	Intronic	ENSEMBL
p11509	5.43321e-10	1.46717e-08	1.55927	114.417	43.9991	81.8644	72.9894	120.867	180.808	ENST00000505721.1	3	-	132965269	132976032	10763	3	ENSG00000251011.1	Intronic	ENSEMBL
p11515	1.0098e-10	1.52494e-06	1.38853	97.6214	120.186	32.8715	153.658	74.6175	119.801	ENST00000459861.1	3	-	135092636	135158664	66028	4	ENSG00000240086.1	Intergenic	ENSEMBL
p11517	4.23387e-06	0.0111473	1.04313	88.284	42.3872	59.204	55.9933	60.7444	81.3264	ENST00000461864.1	3	-	136560567	136580879	20312	3	ENSG00000239213.1	Antisense	ENSEMBL
p11519	0.895927	0.573942	0.911891	725.261	848.651	316.334	81.7491	661.63	980.319	ENST00000470236.1	3	-	136561298	136580896	19598	3	ENSG00000239213.1	Antisense	ENSEMBL
p11520	9.74074e-11	0.000152598	1.00032	1150.18	876.962	1105.41	135.612	1077.47	1920.45	ENST00000462176.2	3	-	136677966	136701038	23072	2	ENSG00000249407.1	Antisense	ENSEMBL
p11522	1.51772e-08	8.30323e-06	1	4.39025	4.39025	4.39025	4.39025	4.39025	4.39025	ENST00000483650.1	3	-	138656749	138662845	6096	3	ENSG00000244578.1	Divergent	ENSEMBL
p11527	0.000611785	0.000161102	1	4.39025	4.39025	4.39025	4.39025	4.39025	4.39025	ENST00000483759.2	3	-	140179841	140181667	1826	2	ENSG00000251058.1	Intronic	ENSEMBL
p11537	1.15593e-05	0.000677987	1.13758	64.6027	18.9378	67.4146	17.2663	94.6887	59.768	ENST00000490375.1	3	-	145784130	145786972	2842	2	ENSG00000240032.1	Divergent	ENSEMBL
p11538	1.32372e-06	4.20547e-14	1	4.39025	4.39025	4.39025	4.39025	4.39025	4.39025	ENST00000473299.1	3	-	146627471	147088443	460972	6	ENSG00000243620.1	Intergenic	ENSEMBL
p11549	5.78494e-05	6.34967e-11	1	4.39025	4.39025	4.39025	4.39025	4.39025	4.39025	ENST00000482382.1	3	-	151835961	151869513	33552	2	ENSG00000239941.1	Intergenic	ENSEMBL
p11551	0.0216493	0.0228328	0.563779	93.2833	197.491	54.2405	51.102	76.2606	67.1495	ENST00000487827.1	3	-	152874299	152879564	5265	2	ENSG00000244268.1	Divergent	ENSEMBL
p11557	6.72607e-13	9.23653e-08	1.83402	198.233	252.001	21.5888	273.23	221.345	370.755	ENST00000498604.1	3	-	154229323	154257098	27775	2	ENSG00000243861.1	Intergenic	ENSEMBL
p11564	1.49817e-05	2.32263e-05	1	4.39025	4.39025	4.39025	4.39025	4.39025	4.39025	ENST00000492937.1	3	-	156389650	156392167	2517	2	ENSG00000243926.1	Divergent	ENSEMBL
p11565	0.00880523	3.47184e-05	1	4.39025	4.39025	4.39025	4.39025	4.39025	4.39025	ENST00000478005.1	3	-	156389652	156391722	2070	2	ENSG00000243926.1	Divergent	ENSEMBL
p11566	0.877603	1.42633e-09	0.657772	104.541	151.759	114.2	104.492	77.682	61.531	ENST00000463449.1	3	-	156389710	156390659	949	2	ENSG00000243926.1	Intergenic	ENSEMBL
p11568	0.520745	1.32748e-08	1	4.39025	4.39025	4.39025	4.39025	4.39025	4.39025	ENST00000488584.1	3	-	156467789	156469308	1519	3	ENSG00000240875.1	Intergenic	ENSEMBL
p11569	0.00277009	0.093203	0.643672	103.94	60.8826	89.9563	22.8014	53.2415	87.9512	ENST00000473352.1	3	-	156470851	156534851	64000	2	ENSG00000240875.1	Intergenic	ENSEMBL
p11570	7.92167e-07	0.476391	1.21641	59.2608	12.1995	79.8215	70.8574	50.382	62.7815	ENST00000471357.1	3	-	156799455	156840793	41338	4	ENSG00000243629.1	Intergenic	ENSEMBL
p11572	0.00353286	0.573199	1.2522	198.426	60.0628	107.655	189.692	39.3002	229.493	ENST00000488999.1	3	-	157734004	157806772	72768	5	ENSG00000242536.1	Intergenic	ENSEMBL
p11585	0.000116662	0.00692297	1.06435	117.842	149.845	113.523	197.578	70.9044	137.258	ENST00000492553.1	3	-	162917364	163021110	103746	8	ENSG00000241369.1	Intergenic	ENSEMBL
p11595	2.17551e-09	2.04334e-05	0.631721	44.0889	78.4587	38.9716	29.0188	10.5092	62.5071	ENST00000470523.2	3	-	167584287	167588765	4478	3	ENSG00000244706.2	Intergenic	ENSEMBL
p11597	0.000452875	8.41023e-06	1	4.39025	4.39025	4.39025	4.39025	4.39025	4.39025	ENST00000602385.1	3	-	169482307	169482848	541	1	ENSG00000270141.1	Intergenic	ENSEMBL
p11598	2.08684e-07	4.68467e-09	1	4.39025	4.39025	4.39025	4.39025	4.39025	4.39025	ENST00000602342.1	3	-	169494979	169498122	3143	1	ENSG00000269984.1	Antisense	ENSEMBL
p11599	8.79125e-08	0.0388942	0.802861	74.8335	97.5491	16.08	76.5569	25.5482	49.2042	ENST00000487580.1	3	-	169657140	169684028	26888	2	ENSG00000239219.2	Divergent	ENSEMBL
p11601	8.68804e-05	0.414854	1	4.39025	4.39025	4.39025	4.39025	4.39025	4.39025	ENST00000600502.1	3	-	169666826	169683902	17076	3	ENSG00000239219.2	Divergent	ENSEMBL
p11603	0.000513691	0.421106	0.628379	94.1815	79.0206	42.529	16.8268	21.2466	97.4875	ENST00000479626.1	3	-	169696323	169703503	7180	2	ENSG00000240373.1	Antisense	ENSEMBL
p11621	1.06481e-06	1.77729e-06	1	4.39025	4.39025	4.39025	4.39025	4.39025	4.39025	ENST00000418585.1	3	-	178052809	178103164	50355	3	ENSG00000223930.1	Intergenic	ENSEMBL
p11623	0.000186202	2.16583e-08	0.673828	93.8964	144.138	150.916	167.356	1.72275	93.0073	ENST00000437488.1	3	-	178244292	178578140	333848	8	ENSG00000237978.1	Antisense	ENSEMBL
p11639	0.0010555	0.0684817	0.487231	78.6348	98.4422	49.3973	59.6149	7.38724	43.3431	ENST00000431427.1	3	-	183812905	183822966	10061	3	ENSG00000238020.1	Antisense	ENSEMBL
p11647	9.67208e-11	0.0299514	0.857325	57.9898	54.8361	76.7811	92.4951	7.8363	62.2235	ENST00000455926.1	3	-	186359303	186383492	24189	3	ENSG00000236524.1	Antisense	ENSEMBL
p11649	4.005e-07	2.94797e-14	0.662569	165.263	66.1645	133.008	26.7965	25.736	188.931	ENST00000354642.2	3	-	186452558	186463919	11361	5	ENSG00000197099.3	Antisense	ENSEMBL
p11650	1.89616e-08	1.35301e-09	1	4.39025	4.39025	4.39025	4.39025	4.39025	4.39025	ENST00000596632.1	3	-	186461493	186471544	10051	3	ENSG00000197099.3	Antisense	ENSEMBL
p11652	0.00571676	3.50188e-05	1.28075	1281.33	420.323	682.433	891.199	265	1897.22	ENST00000577781.1	3	-	186499568	186501968	2400	1	ENSG00000263826.1	Antisense	ENSEMBL
p11653	6.58004e-07	0.0214779	1.68899	21851.6	2691.53	94721.8	83717.9	81377.7	36341.7	ENST00000422718.1	3	-	186569674	186573912	4238	3	ENSG00000226482.1	Antisense	ENSEMBL
p11654	0.00654717	1.93731e-08	1.059	64.2594	64.6203	90.5998	97.6719	87.1369	47.6207	ENST00000356133.3	3	-	186914877	186925417	10540	5	ENSG00000198491.3	Antisense	ENSEMBL
p11660	4.98398e-10	4.94172e-07	1.30643	81.904	27.3255	91.1841	83.6364	43.7591	134.431	ENST00000434996.1	3	-	188280025	188286454	6429	2	ENSG00000224563.1	Intronic	ENSEMBL
p11673	9.71525e-11	0.000375029	2.18255	50.672	6.8642	32.4071	67.1164	93.7605	35.4282	ENST00000420947.1	3	-	193733231	193775468	42237	5	ENSG00000230102.2	Intergenic	ENSEMBL
p11675	1.69935e-10	3.60868e-06	1	4.39025	4.39025	4.39025	4.39025	4.39025	4.39025	ENST00000593326.1	3	-	193760912	193766916	6004	3	ENSG00000230102.2	Intergenic	ENSEMBL
p11690	9.83512e-11	8.58362e-13	1.37735	93.983	75.0288	34.427	16.0884	120.354	143.764	ENST00000455557.1	3	-	194217052	194222232	5180	2	ENSG00000244675.1	Intergenic	ENSEMBL
p11692	2.96076e-05	5.4974e-13	1	4.39025	4.39025	4.39025	4.39025	4.39025	4.39025	ENST00000419899.1	3	-	195001451	195003470	2019	2	ENSG00000229325.1	Intronic	ENSEMBL
p11695	0.41833	0.0175436	1	4.39025	4.39025	4.39025	4.39025	4.39025	4.39025	ENST00000570130.1	3	-	195676058	195679566	3508	1	ENSG00000260261.1	Intergenic	ENSEMBL
p11696	0.333051	4.8121e-09	0.709881	225.482	205.838	188.886	81.1757	91.4415	267.656	ENST00000441644.1	3	-	196358368	196359458	1090	2	ENSG00000232065.1	Intergenic	ENSEMBL
p11699	3.0032e-05	0.749717	1	4.39025	4.39025	4.39025	4.39025	4.39025	4.39025	ENST00000424493.1	3	-	197387435	197392628	5193	2	ENSG00000236833.1	Intergenic	ENSEMBL
p11700	6.65857e-06	2.7437e-06	1	4.39025	4.39025	4.39025	4.39025	4.39025	4.39025	ENST00000454526.1	3	-	197557555	197558167	612	2	ENSG00000234136.1	Antisense	ENSEMBL
p11701	5.56066e-07	6.96575e-12	0.516057	77.7179	16.4894	96.4997	14.5786	28.6972	55.1397	ENST00000423460.1	3	-	197765191	197766105	914	3	ENSG00000232832.1	Antisense	ENSEMBL
p11705	3.35334e-06	0.0730396	0.85406	3479.78	4951.49	1375.95	2416.99	660.116	5298.86	ENST00000423193.1	3	+	898806	899774	968	2	ENSG00000224239.1	Intergenic	ENSEMBL
p11708	3.87169e-08	0.0405087	0.691847	104.354	143.114	62.5053	49.8683	47.304	117.282	ENST00000435651.1	3	+	6190170	6407572	217402	3	ENSG00000226022.1	Intergenic	ENSEMBL
p11721	0.404894	1.60311e-07	1	4.39025	4.39025	4.39025	4.39025	4.39025	4.39025	ENST00000431558.1	3	+	9989087	9996471	7384	4	ENSG00000230082.1	Antisense	ENSEMBL
p11723	1.23844e-10	0.252454	1	4.39025	4.39025	4.39025	4.39025	4.39025	4.39025	ENST00000439539.1	3	+	10327471	10334334	6863	4	ENSG00000240288.1	Antisense	ENSEMBL
p11725	6.12396e-08	0.313477	1	4.39025	4.39025	4.39025	4.39025	4.39025	4.39025	ENST00000438915.1	3	+	13692195	13788126	95931	2	ENSG00000224514.1	Intergenic	ENSEMBL
p11728	6.97397e-08	8.20339e-06	1	4.39025	4.39025	4.39025	4.39025	4.39025	4.39025	ENST00000420195.1	3	+	15295690	15306000	10310	3	ENSG00000224660.1	Antisense	ENSEMBL
p11733	9.85459e-11	7.61732e-06	1	4.39025	4.39025	4.39025	4.39025	4.39025	4.39025	ENST00000598149.1	3	+	18486728	18511194	24466	5	ENSG00000228956.3	Intergenic	ENSEMBL
p11734	0.000206219	0.0282121	0.545835	309.294	375.151	484.861	100.629	12.0846	525.534	ENST00000438418.2	3	+	18504171	18505831	1660	2	ENSG00000228956.3	Intergenic	ENSEMBL
p11735	2.02929e-06	0.3053	0.964958	1348.35	138.053	780.526	703.146	802.329	682.019	ENST00000593741.1	3	+	18505821	18571886	66065	6	ENSG00000228956.3	Intergenic	ENSEMBL
p11736	1.17889e-06	0.0133632	1	4.39025	4.39025	4.39025	4.39025	4.39025	4.39025	ENST00000598740.1	3	+	18507474	18569130	61656	3	ENSG00000228956.3	Intergenic	ENSEMBL
p11737	0.0109336	0.791837	1	4.39025	4.39025	4.39025	4.39025	4.39025	4.39025	ENST00000596850.1	3	+	18507474	18571541	64067	5	ENSG00000228956.3	Intergenic	ENSEMBL
p11742	0.0715479	0.023541	1	4.39025	4.39025	4.39025	4.39025	4.39025	4.39025	ENST00000595865.1	3	+	18507474	18633262	125788	8	ENSG00000228956.3	Intergenic	ENSEMBL
p11744	0.000670015	0.0338429	1	4.39025	4.39025	4.39025	4.39025	4.39025	4.39025	ENST00000599762.1	3	+	18507474	18645733	138259	7	ENSG00000228956.3	Intergenic	ENSEMBL
p11746	0.00739617	3.53297e-06	1.21806	300.517	176.709	373.579	402.794	213.843	419.697	ENST00000593444.1	3	+	18507483	18571646	64163	5	ENSG00000228956.3	Intergenic	ENSEMBL
p11748	0.0689324	0.000439076	0.692088	307.1	403.493	414.761	104.312	312.412	362.12	ENST00000425799.2	3	+	18735378	18959184	223806	8	ENSG00000228956.3	Intergenic	ENSEMBL
p11750	0.263674	2.7414e-13	1	4.39025	4.39025	4.39025	4.39025	4.39025	4.39025	ENST00000448208.1	3	+	20215735	20227919	12184	3	ENSG00000237485.1	Antisense	ENSEMBL
p11751	0.954333	3.06536e-08	1	4.39025	4.39025	4.39025	4.39025	4.39025	4.39025	ENST00000441442.1	3	+	20215777	20227607	11830	4	ENSG00000237485.1	Antisense	ENSEMBL
p11756	5.82154e-07	0.00055745	1.19309	73.3154	43.4178	46.2886	73.4419	24.3131	96.7446	ENST00000436306.1	3	+	21998627	22021320	22693	4	ENSG00000223351.1	Intergenic	ENSEMBL
p11765	1.45587e-08	9.98356e-05	1.29393	136.63	141.569	67.7328	90.4799	167.449	189.684	ENST00000443912.1	3	+	28617901	28799028	181127	4	ENSG00000228214.1	Intergenic	ENSEMBL
p11766	5.49216e-05	0.649118	1	4.39025	4.39025	4.39025	4.39025	4.39025	4.39025	ENST00000445077.1	3	+	28617918	28799086	181168	3	ENSG00000228214.1	Intergenic	ENSEMBL
p11768	6.23407e-09	0.634905	1	4.39025	4.39025	4.39025	4.39025	4.39025	4.39025	ENST00000561507.1	3	+	30739152	30741068	1916	1	ENSG00000261468.1	Intergenic	ENSEMBL
p11770	1.23258e-09	0.205532	0.795082	73.3201	55.5142	62.5241	61.9621	12.9787	77.2048	ENST00000458127.1	3	+	31745597	31746462	865	2	ENSG00000232490.2	Intronic	ENSEMBL
p11771	1.76435e-10	1.05856e-12	1	4.39025	4.39025	4.39025	4.39025	4.39025	4.39025	ENST00000418728.2	3	+	31745708	31763068	17360	4	ENSG00000232490.2	Intronic	ENSEMBL
p11773	1.26962e-09	4.102e-10	0.511172	42.3628	59.8582	34.7172	37.9047	5.50363	26.5906	ENST00000436598.1	3	+	31750813	31763144	12331	4	ENSG00000232490.2	Intronic	ENSEMBL
p11774	2.20576e-07	0.174125	1.36682	399.954	157.079	436.164	526.42	301.745	529.356	ENST00000417313.2	3	+	31752098	31763066	10968	3	ENSG00000232490.2	Intronic	ENSEMBL
p11777	4.24783e-06	0.0574121	0.644502	98.3047	139.977	143.15	25.3829	120.474	99.976	ENST00000455974.1	3	+	34244735	34310303	65568	2	ENSG00000236452.1	Intergenic	ENSEMBL
p11779	3.59445e-12	5.78912e-08	1.2249	342.413	281.838	482.571	430.764	298.241	626.743	ENST00000412811.1	3	+	40807697	40904117	96420	3	ENSG00000231873.1	Intergenic	ENSEMBL
p11780	3.75197e-09	0.000756618	1	4.39025	4.39025	4.39025	4.39025	4.39025	4.39025	ENST00000423165.1	3	+	42744144	42746120	1976	2	ENSG00000230970.2	Antisense	ENSEMBL
p11786	3.09922e-06	6.41736e-08	0.831782	320.188	272.823	320.051	53.6386	271.264	434.565	ENST00000427258.1	3	+	44940669	44942417	1748	2	ENSG00000235845.1	Intronic	ENSEMBL
p11790	1.83611e-06	4.05736e-07	1.0065	115.37	147.451	177.037	112.112	182.303	148.303	ENST00000435419.1	3	+	48885004	48885926	922	2	ENSG00000224424.7	Antisense	ENSEMBL
p11792	0.00149851	4.17752e-06	1	4.39025	4.39025	4.39025	4.39025	4.39025	4.39025	ENST00000412171.2	3	+	48885369	48886887	1518	2	ENSG00000224424.7	Divergent	ENSEMBL
p11793	0.52346	0.00379416	1.23406	75.147	23.8503	17.5165	50.0727	72.73	20.9827	ENST00000416209.2	3	+	48885389	48889414	4025	2	ENSG00000224424.7	Divergent	ENSEMBL
p11795	5.38561e-06	0.000904978	1	4.39025	4.39025	4.39025	4.39025	4.39025	4.39025	ENST00000435478.1	3	+	49936734	49941190	4456	2	ENSG00000230698.1	Antisense	ENSEMBL
p11800	3.51624e-09	2.1888e-08	1.00754	101.074	164.26	150.29	67.913	170.356	180.49	ENST00000454314.1	3	+	50306596	50311111	4515	7	ENSG00000012171.13	Antisense	ENSEMBL
p11804	0.0199159	0.112261	1.04114	200.686	185.263	172.624	211.974	150.902	218.675	ENST00000416295.1	3	+	50312064	50313875	1811	5	ENSG00000012171.13	Antisense	ENSEMBL
p11807	5.73369e-09	2.90234e-08	1	4.39025	4.39025	4.39025	4.39025	4.39025	4.39025	ENST00000483834.1	3	+	52273273	52275113	1840	2	ENSG00000243224.1	Divergent	ENSEMBL
p11809	0.749128	9.09268e-11	0.983537	65.9999	53.3671	47.5431	94.561	31.5262	38.075	ENST00000478366.1	3	+	52857950	52859330	1380	3	ENSG00000239799.1	Antisense	ENSEMBL
p11812	0.00096126	0.0179359	1	4.39025	4.39025	4.39025	4.39025	4.39025	4.39025	ENST00000469484.1	3	+	55521726	55522336	610	2	ENSG00000244586.1	Divergent	ENSEMBL
p11819	9.62222e-11	0.00204265	3.00317	619.195	719.094	6.48056	894.282	906.888	2237.41	ENST00000464125.1	3	+	58592806	58620167	27361	4	ENSG00000244383.1	Antisense	ENSEMBL
p11827	1.14561e-08	0.00469843	1	4.39025	4.39025	4.39025	4.39025	4.39025	4.39025	ENST00000472046.1	3	+	63989697	63997824	8127	3	ENSG00000239653.1	Antisense	ENSEMBL
p11828	1.03467e-05	3.78593e-05	2.18627	1440.6	910.861	175.205	1340.51	384.63	3798.82	ENST00000462717.1	3	+	63997639	64001922	4283	2	ENSG00000243410.1	Antisense	ENSEMBL
p11836	0.00475899	0.00208251	1	4.39025	4.39025	4.39025	4.39025	4.39025	4.39025	ENST00000474313.1	3	+	64547386	64572995	25609	2	ENSG00000241158.2	Antisense	ENSEMBL
p11840	4.37805e-08	3.81693e-06	1	4.39025	4.39025	4.39025	4.39025	4.39025	4.39025	ENST00000597944.1	3	+	64568826	64569589	763	1	ENSG00000241158.2	Intronic	ENSEMBL
p11841	3.55031e-09	5.54337e-08	0.915966	63.4983	21.401	42.8866	66.1352	2.32758	48.5848	ENST00000466225.2	3	+	64568826	64572897	4071	2	ENSG00000241158.2	Intronic	ENSEMBL
p11849	3.58581e-05	0.0128258	1	4.39025	4.39025	4.39025	4.39025	4.39025	4.39025	ENST00000464420.1	3	+	67705120	67797534	92414	4	ENSG00000241316.2	Divergent	ENSEMBL
p11851	1.08749e-06	0.00160224	1	4.39025	4.39025	4.39025	4.39025	4.39025	4.39025	ENST00000496640.2	3	+	67718670	67801093	82423	6	ENSG00000241316.2	Intergenic	ENSEMBL
p11855	0.00393729	8.74134e-06	0.906034	220.882	183.915	184.379	54.426	206.592	272.796	ENST00000596659.1	3	+	69063314	69066658	3344	2	ENSG00000244513.2	Divergent	ENSEMBL
p11857	4.97381e-11	0.209919	1	4.39025	4.39025	4.39025	4.39025	4.39025	4.39025	ENST00000601511.1	3	+	69063314	69084303	20989	4	ENSG00000244513.2	Antisense	ENSEMBL
p11858	0.0316496	2.53218e-09	1	4.39025	4.39025	4.39025	4.39025	4.39025	4.39025	ENST00000599467.1	3	+	69063314	69084610	21296	2	ENSG00000244513.2	Antisense	ENSEMBL
p11869	2.08517e-08	0.0010946	1	4.39025	4.39025	4.39025	4.39025	4.39025	4.39025	ENST00000498832.1	3	+	73857751	73952017	94266	4	ENSG00000242741.1	Intergenic	ENSEMBL
p11872	0.0355589	3.14483e-11	0.613717	105.801	157.416	169.356	104.542	36.5758	124.36	ENST00000484679.1	3	+	78316089	78340341	24252	3	ENSG00000240241.1	Intergenic	ENSEMBL
p11875	0.0021517	1.33791e-08	1	4.39025	4.39025	4.39025	4.39025	4.39025	4.39025	ENST00000473938.1	3	+	80814047	80838505	24458	5	ENSG00000242781.1	Intergenic	ENSEMBL
p11882	0.00647011	0.420191	1	4.39025	4.39025	4.39025	4.39025	4.39025	4.39025	ENST00000485219.1	3	+	88206038	88217879	11841	2	ENSG00000244150.1	Antisense	ENSEMBL
p11885	0.487452	0.261739	0.827146	215.246	207.662	258.064	257.668	54.1462	251.449	ENST00000466089.1	3	+	94657117	94708914	51797	5	ENSG00000239589.1	Intergenic	ENSEMBL
p11895	0.520736	0.0065611	0.955982	331.59	38.6353	410.832	136.301	272.38	337.995	ENST00000498624.1	3	+	101679229	101715376	36147	3	ENSG00000241280.1	Intergenic	ENSEMBL
p11896	9.28703e-06	2.92124e-08	1	4.39025	4.39025	4.39025	4.39025	4.39025	4.39025	ENST00000466734.1	3	+	106959538	106967195	7657	2	ENSG00000243701.1	Intergenic	ENSEMBL
p11897	1.25663e-10	0.0017869	0.925444	3195.72	2582.79	3562.18	2028.05	4464.5	2151.74	ENST00000463143.1	3	+	106959538	107045548	86010	3	ENSG00000243701.1	Intergenic	ENSEMBL
p11898	1.9911e-09	0.31907	1	4.39025	4.39025	4.39025	4.39025	4.39025	4.39025	ENST00000490441.1	3	+	106959538	107045811	86273	4	ENSG00000243701.1	Intergenic	ENSEMBL
p11908	0.00455951	9.76157e-06	1	4.39025	4.39025	4.39025	4.39025	4.39025	4.39025	ENST00000496067.2	3	+	112521324	112531666	10342	3	ENSG00000242770.2	Intergenic	ENSEMBL
p11916	0.0846864	0.0263186	1	4.39025	4.39025	4.39025	4.39025	4.39025	4.39025	ENST00000481773.1	3	+	113933159	113954241	21082	3	ENSG00000241490.1	Antisense	ENSEMBL
p11917	0.000165043	1.53354e-09	1.41222	339.413	351.428	127.697	457.974	62.5926	635.387	ENST00000493033.1	3	+	113933237	113955051	21814	2	ENSG00000241490.1	Antisense	ENSEMBL
p11919	2.66718e-06	0.0719792	1	4.39025	4.39025	4.39025	4.39025	4.39025	4.39025	ENST00000475939.1	3	+	114070681	114107817	37136	9	ENSG00000241560.1	Antisense	ENSEMBL
p11923	3.33276e-08	0.0209884	1.87225	83.8087	11.6665	39.816	89.6065	50.5773	113.115	ENST00000465249.1	3	+	114172439	114238979	66540	3	ENSG00000242290.1	Antisense	ENSEMBL
p11927	1.17801e-10	0.902001	1	4.39025	4.39025	4.39025	4.39025	4.39025	4.39025	ENST00000459855.1	3	+	114970042	115004194	34152	5	ENSG00000242880.1	Intergenic	ENSEMBL
p11931	0.0645931	1.612e-05	1	4.39025	4.39025	4.39025	4.39025	4.39025	4.39025	ENST00000477805.1	3	+	116428625	116442428	13803	3	ENSG00000243197.2	Intergenic	ENSEMBL
p11941	0.0012592	2.52836e-05	0.805129	217.375	212.989	86.7081	55.9529	113.794	246.563	ENST00000485898.1	3	+	119814476	119817634	3158	2	ENSG00000242622.1	Intergenic	ENSEMBL
p11950	4.58854e-07	1.36465e-08	1	4.39025	4.39025	4.39025	4.39025	4.39025	4.39025	ENST00000507924.1	3	+	125803169	125814192	11023	3	ENSG00000250012.1	Intronic	ENSEMBL
p11955	3.73774e-07	2.67274e-10	1	4.39025	4.39025	4.39025	4.39025	4.39025	4.39025	ENST00000479610.1	3	+	127208395	127209630	1235	4	ENSG00000240562.1	Intergenic	ENSEMBL
p11956	1.16112e-07	4.3417e-06	1	4.39025	4.39025	4.39025	4.39025	4.39025	4.39025	ENST00000485218.1	3	+	127794652	127797899	3247	2	ENSG00000239608.1	Intergenic	ENSEMBL
p11958	1.67013e-10	1.40811e-08	2.78121	2726.11	2788.71	357.908	1474.02	1879.62	12979.6	ENST00000464242.1	3	+	128208054	128216209	8155	3	ENSG00000244300.2	Antisense	ENSEMBL
p11961	0.00138961	2.023e-15	0.768401	76.77	79.3688	36.9849	85.7722	9.41963	53.2046	ENST00000511998.1	3	+	129034234	129037154	2920	4	ENSG00000206417.4	Antisense	ENSEMBL
p11963	3.70478e-06	0.74384	1.22257	697.43	165.707	922.513	623.252	575.457	984.374	ENST00000537780.1	3	+	129037036	129042342	5306	3	ENSG00000206417.4	Intergenic	ENSEMBL
p11965	9.72351e-11	0.227855	1	4.39025	4.39025	4.39025	4.39025	4.39025	4.39025	ENST00000507856.1	3	+	129831392	129838273	6881	2	ENSG00000249846.1	Intergenic	ENSEMBL
p11966	9.93932e-08	0.0184742	1.51013	93.9725	130.738	121.456	193.248	155.294	174.213	ENST00000504808.1	3	+	129831494	129838359	6865	3	ENSG00000249846.1	Intergenic	ENSEMBL
p11975	0.0350818	0.0074088	1	4.39025	4.39025	4.39025	4.39025	4.39025	4.39025	ENST00000512622.1	3	+	139108671	139142235	33564	2	ENSG00000248932.1	Divergent	ENSEMBL
p11976	2.35629e-09	0.00476055	1	4.39025	4.39025	4.39025	4.39025	4.39025	4.39025	ENST00000510068.1	3	+	139108679	139171082	62403	4	ENSG00000248932.1	Divergent	ENSEMBL
p11977	1.2587e-10	0.00160697	1	4.39025	4.39025	4.39025	4.39025	4.39025	4.39025	ENST00000515247.1	3	+	139108681	139302161	193480	5	ENSG00000248932.1	Antisense	ENSEMBL
p11981	6.54509e-08	0.000552788	1	4.39025	4.39025	4.39025	4.39025	4.39025	4.39025	ENST00000504735.1	3	+	139556061	139578736	22675	3	ENSG00000251471.1	Intergenic	ENSEMBL
p11983	0.000115833	0.0001136	1	4.39025	4.39025	4.39025	4.39025	4.39025	4.39025	ENST00000513802.1	3	+	140691585	140692097	512	2	ENSG00000248773.1	Intronic	ENSEMBL
p11984	1.0811e-10	0.0205112	2.10086	329.378	390.763	89.3637	245.105	177.114	1278.44	ENST00000507770.1	3	+	141243974	141244963	989	2	ENSG00000250170.1	Intronic	ENSEMBL
p11990	5.03303e-14	0.706315	1.28585	214.076	97.6032	151.452	36.8762	151.092	407.546	ENST00000598139.1	3	+	142683338	142709429	26091	2	ENSG00000241570.3	Intergenic	ENSEMBL
p11993	0.0157945	9.32946e-05	0.860537	117.099	181.796	49.4347	70.2617	119.697	109.792	ENST00000600150.1	3	+	142683338	142735213	51875	6	ENSG00000269192.1	Antisense	ENSEMBL
p11997	0.00402422	1.95441e-11	0.863231	61.0532	13.2638	84.5752	78.3678	7.69579	51.0971	ENST00000479030.1	3	+	143061087	143065913	4826	4	ENSG00000240012.1	Intronic	ENSEMBL
p12009	9.49853e-12	0.000195641	0.995326	2913	2241.49	4891.88	678.218	3852.11	5469.1	ENST00000467198.1	3	+	147657790	147660801	3011	2	ENSG00000239922.1	Intergenic	ENSEMBL
p12010	1.08197e-06	1.62518e-08	1	4.39025	4.39025	4.39025	4.39025	4.39025	4.39025	ENST00000490465.1	3	+	147795945	147805816	9871	2	ENSG00000241131.1	Intergenic	ENSEMBL
p12011	9.62299e-11	2.46708e-05	3.15977	3872.26	325.313	2746.99	4272.62	4796.65	12873.9	ENST00000476987.1	3	+	147810961	147845020	34059	4	ENSG00000241792.1	Intergenic	ENSEMBL
p12012	4.26061e-10	0.273593	0.848619	60.8899	25.3232	91.5272	35.2031	63.5393	52.0914	ENST00000477153.1	3	+	147878697	147944382	65685	3	ENSG00000244650.2	Intergenic	ENSEMBL
p12015	0.0428971	9.29235e-09	0.923289	203.836	119.377	276.926	167.023	134.869	252.209	ENST00000481334.1	3	+	148029933	148117743	87810	3	ENSG00000242440.1	Intergenic	ENSEMBL
p12023	0.0735199	6.76266e-07	0.406764	125.68	179.758	187.987	84.1282	5.04302	111.536	ENST00000471176.2	3	+	149694541	149697115	2574	3	ENSG00000242791.2	Intergenic	ENSEMBL
p12025	2.29351e-08	2.15251e-05	1	4.39025	4.39025	4.39025	4.39025	4.39025	4.39025	ENST00000487840.1	3	+	149757000	149931401	174401	3	ENSG00000243944.1	Intergenic	ENSEMBL
p12027	5.58771e-10	1.23125e-07	1.29396	100.016	1.16849	163.638	72.1305	145.918	124.623	ENST00000489690.1	3	+	149815818	149931513	115695	3	ENSG00000243944.1	Intergenic	ENSEMBL
p12030	5.25505e-11	0.19545	1	4.39025	4.39025	4.39025	4.39025	4.39025	4.39025	ENST00000471093.1	3	+	150421350	150437775	16425	3	ENSG00000240137.1	Antisense	ENSEMBL
p12032	2.03959e-09	1.8134e-07	1	4.39025	4.39025	4.39025	4.39025	4.39025	4.39025	ENST00000463755.1	3	+	150425753	150437782	12029	3	ENSG00000240137.1	Intergenic	ENSEMBL
p12033	7.50652e-05	5.71007e-06	1	4.39025	4.39025	4.39025	4.39025	4.39025	4.39025	ENST00000461943.1	3	+	150479723	150480325	602	2	ENSG00000244265.1	Antisense	ENSEMBL
p12035	1.12418e-10	0.00501647	1.44081	1146.06	792.231	138.963	940.634	75.3759	1976.92	ENST00000469268.1	3	+	150608422	150756605	148183	3	ENSG00000243273.1	Antisense	ENSEMBL
p12048	9.62215e-11	0.000737179	4.85472	1216.24	295.715	1482.48	3118.09	1333.84	10085.2	ENST00000472913.1	3	+	155203591	155204910	1319	2	ENSG00000242925.1	Intronic	ENSEMBL
p12052	3.2664e-07	0.332204	1	4.39025	4.39025	4.39025	4.39025	4.39025	4.39025	ENST00000480817.1	3	+	156881240	156886922	5682	2	ENSG00000241770.1	Intergenic	ENSEMBL
p12053	2.41951e-10	1.98337e-09	0.593656	41.3512	48.4959	92.5236	20.2802	28.5309	59.4543	ENST00000460796.1	3	+	156893011	156957753	64742	2	ENSG00000243176.1	Intergenic	ENSEMBL
p12054	0.000122479	0.981533	1	4.39025	4.39025	4.39025	4.39025	4.39025	4.39025	ENST00000487238.1	3	+	156893057	157099054	205997	3	ENSG00000243176.1	Antisense	ENSEMBL
p12055	1.24686e-09	4.78224e-06	1.18973	403.315	106.406	686.893	389.27	285.159	749.218	ENST00000488040.1	3	+	156893135	157003080	109945	3	ENSG00000243176.1	Antisense	ENSEMBL
p12062	1.9814e-07	1.62716e-06	1	4.39025	4.39025	4.39025	4.39025	4.39025	4.39025	ENST00000473595.1	3	+	161144214	161166030	21816	4	ENSG00000240567.1	Intergenic	ENSEMBL
p12069	0.00942552	4.15119e-08	1.26077	85.8692	92.4167	52.9569	89.2656	86.9187	115.36	ENST00000475324.1	3	+	167584422	167601170	16748	7	ENSG00000240292.1	Intergenic	ENSEMBL
p12084	1.05954e-10	8.13576e-07	1.02846	85.0934	47.0456	32.3805	39.0161	47.0706	83.1151	ENST00000468232.1	3	+	170128299	170136403	8104	4	ENSG00000242578.1	Divergent	ENSEMBL
p12089	1.34842e-09	0.079912	1	4.39025	4.39025	4.39025	4.39025	4.39025	4.39025	ENST00000454723.2	3	+	176762648	176765711	3063	2	ENSG00000231310.2	Antisense	ENSEMBL
p12090	2.63071e-09	9.12068e-08	1	4.39025	4.39025	4.39025	4.39025	4.39025	4.39025	ENST00000425388.1	3	+	177012229	177041206	28977	2	ENSG00000203645.2	Intergenic	ENSEMBL
p12100	0.00348765	0.345659	0.82986	62.1566	70.5332	36.384	32.8239	59.7605	47.7231	ENST00000441018.1	3	+	178137045	178175091	38046	2	ENSG00000223941.1	Intergenic	ENSEMBL
p12102	1.61138e-09	6.16927e-09	1	4.39025	4.39025	4.39025	4.39025	4.39025	4.39025	ENST00000600539.1	3	+	179114748	179116979	2231	2	ENSG00000242539.2	Antisense	ENSEMBL
p12103	9.09973e-09	1.20243e-06	1	4.39025	4.39025	4.39025	4.39025	4.39025	4.39025	ENST00000598857.1	3	+	179115120	179116103	983	2	ENSG00000242539.2	Antisense	ENSEMBL
p12104	9.03928e-06	4.15863e-06	1	4.39025	4.39025	4.39025	4.39025	4.39025	4.39025	ENST00000495081.2	3	+	179115495	179116471	976	2	ENSG00000242539.2	Antisense	ENSEMBL
p12111	3.12037e-06	2.37863e-07	1.14981	169.7	67.8472	95.6477	123.309	52.7689	207.032	ENST00000487240.1	3	+	180707557	180775032	67475	3	ENSG00000242808.2	Antisense	ENSEMBL
p12112	0.000262289	7.94144e-07	0.991539	49.7081	23.3052	71.1106	48.0415	67.7588	27.1042	ENST00000461063.2	3	+	180707568	180893607	186039	4	ENSG00000242808.2	Divergent	ENSEMBL
p12118	0.000358334	0.000613615	1.00828	60.1698	12.692	52.6715	54.8372	38.7429	32.993	ENST00000595313.1	3	+	181268542	181348792	80250	6	ENSG00000242808.2	Intergenic	ENSEMBL
p12120	0.000130786	6.52606e-06	1	4.39025	4.39025	4.39025	4.39025	4.39025	4.39025	ENST00000598867.1	3	+	181268581	181389400	120819	3	ENSG00000242808.2	Intergenic	ENSEMBL
p12125	7.56895e-05	0.0690034	1	4.39025	4.39025	4.39025	4.39025	4.39025	4.39025	ENST00000476125.1	3	+	181328396	181428083	99687	4	ENSG00000242808.2	Intergenic	ENSEMBL
p12126	0.000439591	0.0839012	0.792119	84.3723	49.426	15.567	8.88501	39.5098	69.9203	ENST00000477928.1	3	+	181417280	181457867	40587	2	ENSG00000242808.2	Antisense	ENSEMBL
p12130	0.00348474	2.72061e-09	1.0982	664.408	829.635	516.785	613.433	720.427	874.43	ENST00000600801.1	3	+	181417382	181457458	40076	4	ENSG00000242808.2	Antisense	ENSEMBL
p12132	8.8168e-10	2.78126e-10	0.98007	93.5123	20.5701	174.59	112.495	50.9687	119.456	ENST00000593549.1	3	+	181417382	181457618	40236	4	ENSG00000242808.2	Antisense	ENSEMBL
p12136	0.0816626	0.00140887	0.464517	85.3664	33.4314	6.71884	20.8721	7.87034	29.5622	ENST00000600750.1	3	+	181670136	181690285	20149	5	ENSG00000242512.3	Intergenic	ENSEMBL
p12137	0.167753	2.86663e-05	0.926859	98.931	160.516	153.885	167.705	161.779	53.6165	ENST00000490001.1	3	+	181670160	181718050	47890	7	ENSG00000242512.3	Intergenic	ENSEMBL
p12138	0.00704079	6.51258e-07	1	4.39025	4.39025	4.39025	4.39025	4.39025	4.39025	ENST00000467313.1	3	+	181670161	181691133	20972	5	ENSG00000242512.3	Intergenic	ENSEMBL
p12147	9.32446e-09	3.69044e-05	1.26349	89.6851	24.4446	54.3498	36.7621	63.7366	112.373	ENST00000444571.1	3	+	184880658	184898371	17713	4	ENSG00000223358.1	Intergenic	ENSEMBL
p12149	1.80978e-09	0.0568783	0.994775	65.9396	32.3438	44.1519	53.3326	11.2942	77.0642	ENST00000453370.1	3	+	185796958	185798736	1778	2	ENSG00000234197.1	Antisense	ENSEMBL
p12155	0.297326	0.00907496	1.12879	723.328	322.409	642.383	498.709	359.923	1046.9	ENST00000450760.1	3	+	187461473	187463208	1735	2	ENSG00000223401.1	Antisense	ENSEMBL
p12157	0.00123768	4.7451e-09	1.82223	61.7296	10.2131	1.03545	82.7831	12.9197	37.2802	ENST00000417384.1	3	+	187514042	187522925	8883	3	ENSG00000224049.1	Intergenic	ENSEMBL
p12160	2.46116e-06	5.59868e-10	1	4.39025	4.39025	4.39025	4.39025	4.39025	4.39025	ENST00000439804.1	3	+	191275112	191308145	33033	4	ENSG00000223812.1	Intergenic	ENSEMBL
p12161	0.00443323	0.000783076	0.776645	89.2479	72.5651	26.6595	18.5615	52.0042	75.8104	ENST00000438488.1	3	+	191286323	191291298	4975	3	ENSG00000223812.1	Intergenic	ENSEMBL
p12162	3.06835e-07	0.633218	1	4.39025	4.39025	4.39025	4.39025	4.39025	4.39025	ENST00000452657.1	3	+	191747668	191754031	6363	3	ENSG00000232353.1	Intergenic	ENSEMBL
p12169	9.63309e-11	2.30992e-05	1.70659	284.035	206.418	362.161	439.808	298.347	716.905	ENST00000426459.1	3	+	193271200	193272701	1501	3	ENSG00000225473.1	Antisense	ENSEMBL
p12174	1.08035e-09	2.04611e-11	1.26091	51.8982	94.7622	43.1563	97.1249	86.8524	55.3635	ENST00000448892.1	3	+	194208182	194239008	30826	3	ENSG00000233058.1	Intergenic	ENSEMBL
p12175	4.42661e-06	0.0460219	1	4.39025	4.39025	4.39025	4.39025	4.39025	4.39025	ENST00000437597.1	3	+	194218687	194231376	12689	2	ENSG00000233058.1	Intergenic	ENSEMBL
p12176	0.000277232	2.60388e-09	1	4.39025	4.39025	4.39025	4.39025	4.39025	4.39025	ENST00000453671.1	3	+	194304739	194310989	6250	4	ENSG00000231770.1	Antisense	ENSEMBL
p12178	9.42002e-07	0.000438819	0.929097	78.6109	65.2031	94.5863	80.3068	72.9214	68.2688	ENST00000439479.1	3	+	194426276	194427693	1417	2	ENSG00000233987.1	Intergenic	ENSEMBL
p12182	4.48039e-09	0.00266375	1	4.39025	4.39025	4.39025	4.39025	4.39025	4.39025	ENST00000415410.1	3	+	194500957	194502106	1149	2	ENSG00000240295.1	Intergenic	ENSEMBL
p12185	0.490641	8.10634e-10	0.688513	87.2109	60.0598	40.5974	61.9727	5.64511	61.7319	ENST00000447975.1	3	+	194868599	194873519	4920	2	ENSG00000230266.1	Intronic	ENSEMBL
p12191	0.00302759	0.00786428	1.60882	316.913	401.428	75.6156	283.426	480.249	513.662	ENST00000452844.1	3	+	195384935	195390980	6045	5	ENSG00000242086.3	Intergenic	ENSEMBL
p12192	0.000373645	6.15441e-05	1.00841	2766.72	4304.78	216.275	526.462	2278.19	4544.45	ENST00000429897.1	3	+	195384935	195415733	30798	14	ENSG00000242086.3	Intergenic	ENSEMBL
p12193	4.21345e-05	3.17027e-09	1	4.39025	4.39025	4.39025	4.39025	4.39025	4.39025	ENST00000453324.1	3	+	195384943	195398662	13719	7	ENSG00000242086.3	Intergenic	ENSEMBL
p12196	0.0228635	0.859376	1	4.39025	4.39025	4.39025	4.39025	4.39025	4.39025	ENST00000598992.1	3	+	195414691	195426041	11350	4	ENSG00000242086.3	Intergenic	ENSEMBL
p12199	5.82789e-06	7.15882e-08	1.22077	674.259	348.238	564.044	32.9283	741.748	1162.12	ENST00000458180.1	3	+	195634946	195638128	3182	2	ENSG00000224614.1	Antisense	ENSEMBL
p12200	1.43466e-10	0.000126739	1.02473	747.511	740.985	326.309	336.868	328.327	1194.48	ENST00000448113.1	3	+	195638919	195640857	1938	2	ENSG00000226155.1	Intergenic	ENSEMBL
p12202	0.000158303	0.405066	1	4.39025	4.39025	4.39025	4.39025	4.39025	4.39025	ENST00000457079.1	3	+	195869506	195887761	18255	3	ENSG00000224652.1	Intergenic	ENSEMBL
p12203	7.00064e-07	7.08826e-07	1	4.39025	4.39025	4.39025	4.39025	4.39025	4.39025	ENST00000425275.1	3	+	195977419	195978525	1106	2	ENSG00000228028.1	Intronic	ENSEMBL
p12204	0.117444	0.000635755	0.895456	329.453	47.2275	386.3	136.322	323.148	223.746	ENST00000420226.1	3	+	196045200	196050544	5344	2	ENSG00000235897.1	Antisense	ENSEMBL
p12208	9.95723e-11	9.26498e-10	0.8704	6076.31	1560.45	1645.38	2979.55	536.005	4563.61	ENST00000442941.1	3	+	196158255	196159401	1146	2	ENSG00000225822.3	Antisense	ENSEMBL
p12211	9.6251e-11	0.00672619	0.894751	997.903	740.772	523.774	425.226	1202	397.099	ENST00000602845.1	3	+	196669493	196670411	918	1	ENSG00000270170.1	Divergent	ENSEMBL
p12215	2.87484e-07	0.0304994	1	4.39025	4.39025	4.39025	4.39025	4.39025	4.39025	ENST00000420213.1	3	+	197185275	197193976	8701	2	ENSG00000237167.1	Intergenic	ENSEMBL
p21821	6.09508e-09	0.00741463	1.69698	138.644	39.2468	69.0801	174.185	67.2975	177.622	TCONS_00006396	3	-	2139210	2139848	638	2	XLOC_003017	Divergent	HumanLincRNACatalog
p21823	0.0431583	3.55839e-07	1.25774	291.292	62.8098	383.456	261.475	333.621	332.564	TCONS_00006399	3	-	4521578	4534821	13243	2	XLOC_003021	Divergent	HumanLincRNACatalog
p21843	6.96866e-06	4.98212e-06	1	4.39025	4.39025	4.39025	4.39025	4.39025	4.39025	TCONS_00006466	3	-	33002604	33016096	13492	2	XLOC_003077	Intergenic	HumanLincRNACatalog
p21847	0.00393943	7.60484e-08	1	4.39025	4.39025	4.39025	4.39025	4.39025	4.39025	TCONS_00005763	3	-	40503866	40508645	4779	2	XLOC_003092	Divergent	HumanLincRNACatalog
p21850	0.301394	4.53328e-07	1	4.39025	4.39025	4.39025	4.39025	4.39025	4.39025	TCONS_00006500	3	-	44462624	44464380	1756	2	XLOC_003104	Intergenic	HumanLincRNACatalog
p21855	4.46795e-06	3.15326e-13	1.11908	127.323	132.877	186.932	42.996	196.805	260.576	TCONS_00006513	3	-	53112199	53120488	8289	2	XLOC_003130	Intergenic	HumanLincRNACatalog
p21861	3.08773e-06	3.94904e-08	0.881207	210.437	225.47	85.7829	43.5399	115.288	300.889	TCONS_00007180	3	-	64928164	64961877	33713	2	XLOC_003149	Intergenic	HumanLincRNACatalog
p21864	3.63983e-07	0.932352	1.37401	78.3092	3.46272	85.2761	76.8668	44.5947	108.063	TCONS_00006527	3	-	66831271	66874793	43522	2	XLOC_003152	Intergenic	HumanLincRNACatalog
p21868	9.62875e-11	0.0324901	1.93269	114.49	58.7985	101.787	44.9413	164.303	322.393	TCONS_00007189	3	-	72712457	72713404	947	2	XLOC_003162	Intergenic	HumanLincRNACatalog
p21876	1.47346e-05	0.000518595	0.777376	80.2301	87.3236	72.046	34.1545	48.0861	104.019	TCONS_00006553	3	-	86954826	86959897	5071	4	XLOC_003177	Intergenic	HumanLincRNACatalog
p21877	4.07847e-09	1.61002e-05	1	4.39025	4.39025	4.39025	4.39025	4.39025	4.39025	TCONS_00007196	3	-	96335998	96337060	1062	2	XLOC_003181	Intergenic	HumanLincRNACatalog
p21881	2.05084e-05	4.34053e-08	1	4.39025	4.39025	4.39025	4.39025	4.39025	4.39025	TCONS_00006566	3	-	102383381	102392850	9469	3	XLOC_003194	Intergenic	HumanLincRNACatalog
p21890	0.0128568	0.00856192	0.830835	77.154	3.57509	94.2528	31.259	73.7366	40.3855	TCONS_00006578	3	-	106404384	106436169	31785	4	XLOC_003200	Intergenic	HumanLincRNACatalog
p21901	0.000193917	0.0594568	1.8193	1336.03	1058.77	987.867	1296.47	1271.38	3586.25	TCONS_00006590	3	-	106828780	106928374	99594	3	XLOC_003204	Intergenic	HumanLincRNACatalog
p21904	0.000989655	3.42799e-09	0.815034	1013.21	984.508	1458.58	565.523	1472.72	778.76	TCONS_00006598	3	-	107560789	107597182	36393	10	XLOC_003208	Intergenic	HumanLincRNACatalog
p21907	1.8985e-10	5.53854e-07	1	4.39025	4.39025	4.39025	4.39025	4.39025	4.39025	TCONS_00006601	3	-	107732833	107757940	25107	4	XLOC_003209	Intergenic	HumanLincRNACatalog
p21914	3.56671e-09	0.00276577	1	4.39025	4.39025	4.39025	4.39025	4.39025	4.39025	TCONS_00006618	3	-	117397616	117410046	12430	4	XLOC_003222	Intergenic	HumanLincRNACatalog
p21916	9.70225e-10	0.000191006	1	4.39025	4.39025	4.39025	4.39025	4.39025	4.39025	TCONS_00006619	3	-	120084473	120086653	2180	3	XLOC_003225	Intergenic	HumanLincRNACatalog
p21920	3.0959e-08	2.69319e-07	1.19656	58.5304	11.936	98.7495	79.8649	61.7769	60.8345	TCONS_00007245	3	-	124788639	124798378	9739	4	XLOC_003228	Intergenic	HumanLincRNACatalog
p21921	2.62421e-09	1.58639e-07	0.980186	689.197	893.298	682.288	757.195	316.97	1145.74	TCONS_00006634	3	-	126006729	126011709	4980	3	XLOC_003235	Intergenic	HumanLincRNACatalog
p21925	0.0275247	0.131012	1.78709	81.77	6.02198	20.3748	56.8115	84.3415	52.1505	TCONS_00006636	3	-	126011855	126020383	8528	2	XLOC_003235	Intergenic	HumanLincRNACatalog
p21928	0.00600098	2.65889e-09	0.499905	81.8384	76.7844	9.8309	12.8848	21.9553	49.3707	TCONS_00006646	3	-	127199570	127241404	41834	4	XLOC_003240	Intergenic	HumanLincRNACatalog
p21936	0.0109419	0.000609407	1	4.39025	4.39025	4.39025	4.39025	4.39025	4.39025	TCONS_00005825	3	-	128719319	128720388	1069	3	XLOC_003245	Divergent	HumanLincRNACatalog
p21937	0.0594157	6.72424e-09	1.14658	1137.53	537.745	1215.02	1331.2	449.871	1532.89	TCONS_00005826	3	-	128719476	128720388	912	2	XLOC_003245	Divergent	HumanLincRNACatalog
p21944	0.19903	5.47402e-10	1.01424	410.598	757.954	331.845	709.206	321.992	490.572	TCONS_00006666	3	-	134294593	134299804	5211	2	XLOC_003262	Divergent	HumanLincRNACatalog
p21945	1.31783e-05	0.000129581	1.01066	125.697	108.36	122.037	85.4874	134.139	140.266	TCONS_00006667	3	-	134979869	135098660	118791	3	XLOC_003263	Divergent	HumanLincRNACatalog
p21950	2.00092e-10	5.10648e-09	0.606972	114.317	118.725	43.6039	37.5126	71.2147	59.189	TCONS_00006679	3	-	148164072	148173245	9173	3	XLOC_003276	Intergenic	HumanLincRNACatalog
p21955	1.21886e-10	5.40689e-07	1	4.39025	4.39025	4.39025	4.39025	4.39025	4.39025	TCONS_00006693	3	-	156800898	156819880	18982	2	XLOC_003303	Intergenic	HumanLincRNACatalog
p21956	1.04558e-08	0.0932729	1.0899	305.335	112.563	331.378	304.283	99.1287	413.225	TCONS_00006704	3	-	166641737	166643655	1918	2	XLOC_003318	Intergenic	HumanLincRNACatalog
p21963	8.45136e-10	0.000110549	1	4.39025	4.39025	4.39025	4.39025	4.39025	4.39025	TCONS_00006716	3	-	181138037	181160296	22259	4	XLOC_003343	Intergenic	HumanLincRNACatalog
p21970	0.171695	4.33289e-07	1	4.39025	4.39025	4.39025	4.39025	4.39025	4.39025	TCONS_00007319	3	-	182698646	182703735	5089	2	XLOC_003351	Divergent	HumanLincRNACatalog
p21975	0.0666911	2.7273e-05	1	4.39025	4.39025	4.39025	4.39025	4.39025	4.39025	TCONS_00006729	3	-	187553659	187574106	20447	2	XLOC_003364	Intergenic	HumanLincRNACatalog
p21976	1.44684e-05	1.43508e-08	1.2351	342.192	414.033	99.2758	137.214	456.671	462.747	TCONS_00006730	3	-	187676547	187679189	2642	2	XLOC_003365	Intergenic	HumanLincRNACatalog
p21979	0.000297902	3.63482e-09	0.768375	65.6285	87.8208	99.8485	92.0686	50.3772	52.1819	TCONS_00006736	3	-	191466401	191467882	1481	2	XLOC_003374	Intergenic	HumanLincRNACatalog
p21984	1.32179e-09	0.139384	1	4.39025	4.39025	4.39025	4.39025	4.39025	4.39025	TCONS_00007329	3	-	194019282	194023812	4530	2	XLOC_003385	Intergenic	HumanLincRNACatalog
p21985	9.7613e-06	0.748002	1	4.39025	4.39025	4.39025	4.39025	4.39025	4.39025	TCONS_00006756	3	-	194021489	194023848	2359	2	XLOC_003385	Intergenic	HumanLincRNACatalog
p21988	0.0219197	2.02297e-08	1.07143	1396.32	427.428	966.995	157.645	877.741	1954.69	TCONS_00007353	3	-	195725734	195731964	6230	2	XLOC_003397	Intergenic	HumanLincRNACatalog
p21992	9.33508e-10	0.00050206	1.04023	990.909	1333.01	1234.97	503.435	1465.62	1733.01	TCONS_00006771	3	-	197363337	197374168	10831	3	XLOC_003405	Intergenic	HumanLincRNACatalog
p21994	0.00212592	0.552257	1	4.39025	4.39025	4.39025	4.39025	4.39025	4.39025	TCONS_00006773	3	-	197374633	197381275	6642	2	XLOC_003406	Intergenic	HumanLincRNACatalog
p22006	2.32179e-07	0.00118988	1.59694	305.929	64.9587	210.614	364.84	107.995	455.785	TCONS_00006784	3	+	14266656	14272219	5563	3	XLOC_002581	Intergenic	HumanLincRNACatalog
p22025	1.46634e-05	0.0123293	1	4.39025	4.39025	4.39025	4.39025	4.39025	4.39025	TCONS_00006813	3	+	34200864	34476811	275947	5	XLOC_002612	Intergenic	HumanLincRNACatalog
p22026	0.000404735	0.00345793	1.02982	59.7683	78.5042	45.3655	90.2674	43.6211	55.2251	TCONS_00005982	3	+	34200899	34477097	276198	7	XLOC_002612	Intergenic	HumanLincRNACatalog
p22031	0.000791777	4.07475e-07	1.32694	77.5042	44.2337	33.5229	85.9872	77.5853	42.4498	TCONS_00006816	3	+	34598079	34604551	6472	3	XLOC_002612	Intergenic	HumanLincRNACatalog
p22033	0.124246	0.00196898	1	4.39025	4.39025	4.39025	4.39025	4.39025	4.39025	TCONS_00005988	3	+	38864385	38866732	2347	2	XLOC_002615	Intergenic	HumanLincRNACatalog
p22035	0.00288768	1.35291e-08	0.670995	75.2409	31.6849	89.4379	84.1803	1.73667	45.842	TCONS_00005990	3	+	39221226	39223012	1786	2	XLOC_002616	Intergenic	HumanLincRNACatalog
p22036	2.70333e-07	0.0173632	1	4.39025	4.39025	4.39025	4.39025	4.39025	4.39025	TCONS_00005991	3	+	39244495	39246970	2475	2	XLOC_002617	Intergenic	HumanLincRNACatalog
p22039	0.000465611	5.43048e-07	1	4.39025	4.39025	4.39025	4.39025	4.39025	4.39025	TCONS_00006817	3	+	39299896	39300682	786	2	XLOC_002618	Intergenic	HumanLincRNACatalog
p22041	3.36008e-10	4.92367e-11	1	4.39025	4.39025	4.39025	4.39025	4.39025	4.39025	TCONS_00005996	3	+	40684764	40685532	768	2	XLOC_002621	Intergenic	HumanLincRNACatalog
p22044	1.71756e-10	0.0314576	1	4.39025	4.39025	4.39025	4.39025	4.39025	4.39025	TCONS_00006001	3	+	43156199	43168213	12014	2	XLOC_002628	Intergenic	HumanLincRNACatalog
p22048	1.08497e-10	0.360245	1	4.39025	4.39025	4.39025	4.39025	4.39025	4.39025	TCONS_00006010	3	+	47205720	47211101	5381	2	XLOC_002636	Divergent	HumanLincRNACatalog
p22056	0.451003	0.00673917	0.901156	197.133	153.76	176.7	260.989	17.888	196.566	TCONS_00006852	3	+	52279001	52279536	535	2	XLOC_002653	Divergent	HumanLincRNACatalog
p22057	5.11235e-11	0.910651	1.45835	2576.11	281.636	1533.81	754.834	1912.53	3737.06	TCONS_00006853	3	+	52312782	52314314	1532	2	XLOC_002654	Divergent	HumanLincRNACatalog
p22062	3.8016e-09	2.78609e-05	1.04156	200.79	241.415	120.223	52.9043	209.689	323.207	TCONS_00006040	3	+	61284243	61299032	14789	3	XLOC_002680	Intergenic	HumanLincRNACatalog
p22069	0.000135314	0.000218359	1	4.39025	4.39025	4.39025	4.39025	4.39025	4.39025	TCONS_00006084	3	+	67891018	67939460	48442	3	XLOC_002693	Intergenic	HumanLincRNACatalog
p22074	0.0133963	8.68559e-07	1	4.39025	4.39025	4.39025	4.39025	4.39025	4.39025	TCONS_00006091	3	+	71834485	71835668	1183	3	XLOC_002701	Divergent	HumanLincRNACatalog
p22077	0.647388	6.38652e-06	0.68807	615.897	872.221	891.742	115.08	144.252	1378.18	TCONS_00006888	3	+	71834784	71837924	3140	3	XLOC_002701	Divergent	HumanLincRNACatalog
p22081	8.87855e-06	0.0665284	1.76633	63.3077	40.9221	16.103	82.5158	81.5025	48.5297	TCONS_00006097	3	+	74955610	74956762	1152	3	XLOC_002708	Intergenic	HumanLincRNACatalog
p22093	1.4538e-08	0.0886152	1.20573	63.5991	34.515	65.8478	53.7021	86.986	57.0049	TCONS_00006107	3	+	81043033	81146631	103598	3	XLOC_002717	Intergenic	HumanLincRNACatalog
p22106	0.752876	0.0533245	1	4.39025	4.39025	4.39025	4.39025	4.39025	4.39025	TCONS_00006915	3	+	96336028	96336495	467	2	XLOC_002730	Intergenic	HumanLincRNACatalog
p22107	0.180719	2.03932e-06	1	4.39025	4.39025	4.39025	4.39025	4.39025	4.39025	TCONS_00006916	3	+	96336044	96336983	939	2	XLOC_002730	Intergenic	HumanLincRNACatalog
p22109	0.530183	5.11922e-08	1	4.39025	4.39025	4.39025	4.39025	4.39025	4.39025	TCONS_00006918	3	+	96336527	96337036	509	2	XLOC_002730	Intergenic	HumanLincRNACatalog
p22114	0.173751	0.00113186	0.526758	205.068	213.969	183.403	143.874	1.53008	171.935	TCONS_00006136	3	+	101713657	101715502	1845	2	XLOC_002741	Intergenic	HumanLincRNACatalog
p22115	2.30652e-09	2.36665e-05	1	4.39025	4.39025	4.39025	4.39025	4.39025	4.39025	TCONS_00006137	3	+	102444624	102446410	1786	2	XLOC_002742	Intergenic	HumanLincRNACatalog
p22120	4.57047e-09	0.00275958	1.4934	170.989	67.2028	35.4212	20.8536	81.5324	306.228	TCONS_00006140	3	+	106959574	107004434	44860	3	XLOC_002746	Intergenic	HumanLincRNACatalog
p22126	0.953483	3.38539e-06	1.07398	95.6721	69.2217	26.2967	28.4344	130.697	46.2037	TCONS_00006163	3	+	116638698	116651245	12547	2	XLOC_002769	Intergenic	HumanLincRNACatalog
p22130	7.74369e-06	0.00950407	1.2316	74.256	19.4147	80.0797	40.2667	89.0835	84.6399	TCONS_00006167	3	+	117376775	117381146	4371	2	XLOC_002772	Intergenic	HumanLincRNACatalog
p22137	1.83547e-06	6.21392e-06	0.897099	63.204	91.3618	91.8752	88.6535	84.2656	48.1628	TCONS_00006176	3	+	119817721	119824125	6404	2	XLOC_002779	Intergenic	HumanLincRNACatalog
p22138	4.0514e-09	0.00856404	0.672056	79.6153	89.8806	83.5029	64.5508	35.1603	70.3182	TCONS_00006187	3	+	122998229	122998762	533	2	XLOC_002788	Intergenic	HumanLincRNACatalog
p22143	3.42903e-11	0.00489781	1	4.39025	4.39025	4.39025	4.39025	4.39025	4.39025	TCONS_00006200	3	+	125934370	125966235	31865	2	XLOC_002796	Intergenic	HumanLincRNACatalog
p22144	4.8312e-05	0.208844	1	4.39025	4.39025	4.39025	4.39025	4.39025	4.39025	TCONS_00006201	3	+	125985644	126010400	24756	2	XLOC_002797	Intergenic	HumanLincRNACatalog
p22145	0.915908	0.494398	0.538162	75.4525	98.6858	64.5139	61.2707	24.3235	42.8394	TCONS_00006202	3	+	126006617	126010330	3713	2	XLOC_002797	Intergenic	HumanLincRNACatalog
p22147	0.209153	9.17725e-10	1.1482	640.961	513.988	266.766	455.45	431.876	745.082	TCONS_00006963	3	+	127256955	127259967	3012	3	XLOC_002803	Intergenic	HumanLincRNACatalog
p22153	0.0874312	0.820216	1.12479	164.627	175.017	110.417	154.683	100.41	251.132	TCONS_00006222	3	+	128949392	128955149	5757	3	XLOC_002813	Intergenic	HumanLincRNACatalog
p22165	4.45028e-07	0.18392	1	4.39025	4.39025	4.39025	4.39025	4.39025	4.39025	TCONS_00007002	3	+	148658604	148673471	14867	2	XLOC_002863	Intergenic	HumanLincRNACatalog
p22166	0.000127068	8.2121e-09	1	4.39025	4.39025	4.39025	4.39025	4.39025	4.39025	TCONS_00006262	3	+	148942374	148944122	1748	3	XLOC_002865	Intergenic	HumanLincRNACatalog
p22167	4.01087e-06	0.000254328	1.16812	409.92	249.671	796.991	343.346	796.914	561.199	TCONS_00007003	3	+	148943133	148944127	994	2	XLOC_002865	Intergenic	HumanLincRNACatalog
p22169	0.0456401	0.0590088	1	4.39025	4.39025	4.39025	4.39025	4.39025	4.39025	TCONS_00006267	3	+	149756946	149758445	1499	3	XLOC_002870	Intergenic	HumanLincRNACatalog
p22180	0.00165403	4.69109e-06	1	4.39025	4.39025	4.39025	4.39025	4.39025	4.39025	TCONS_00007011	3	+	153480917	153482081	1164	2	XLOC_002884	Intergenic	HumanLincRNACatalog
p22186	0.343477	0.000501819	1	4.39025	4.39025	4.39025	4.39025	4.39025	4.39025	TCONS_00006290	3	+	158586272	158602973	16701	3	XLOC_002897	Intergenic	HumanLincRNACatalog
p22200	0.807275	0.116217	0.562015	124.86	82.8271	177.227	9.84362	116.06	90.424	TCONS_00006313	3	+	174176207	174177068	861	2	XLOC_002925	Intergenic	HumanLincRNACatalog
p22215	2.35196e-06	5.75898e-11	0.419323	100.382	181.935	128.266	26.3025	21.941	123.923	TCONS_00007050	3	+	184119379	184168918	49539	3	XLOC_002949	Intergenic	HumanLincRNACatalog
p22218	0.00470196	3.53675e-07	0.942312	1001.84	795.579	197.023	681.1	0.463742	1197.82	TCONS_00006331	3	+	184429981	184433265	3284	2	XLOC_002951	Divergent	HumanLincRNACatalog
p22239	3.40754e-07	0.573608	1.07153	113.803	129.221	144.178	104.206	167.834	142.861	TCONS_00006356	3	+	193796216	193809948	13732	2	XLOC_002975	Intergenic	HumanLincRNACatalog
p22246	1.1268e-10	0.00259004	1	4.39025	4.39025	4.39025	4.39025	4.39025	4.39025	TCONS_00006375	3	+	195362628	195363268	640	2	XLOC_002995	Intergenic	HumanLincRNACatalog
p22250	1.17504e-07	0.077029	1	4.39025	4.39025	4.39025	4.39025	4.39025	4.39025	TCONS_00006377	3	+	195370820	195377621	6801	2	XLOC_002996	Intergenic	HumanLincRNACatalog
p22254	2.02319e-07	0.0124397	1	4.39025	4.39025	4.39025	4.39025	4.39025	4.39025	TCONS_00007086	3	+	196417083	196420127	3044	2	XLOC_003007	Intergenic	HumanLincRNACatalog
p25239	3.65641e-11	5.33272e-07	1.01532	211.563	237.442	227.692	176.498	103.664	406.904	XR_110031.3	3	-	11603075	11605949	2874	1	LOC100133039	Intronic	RefSeq
p25242	0.000647045	0.0402591	1	4.39025	4.39025	4.39025	4.39025	4.39025	4.39025	XR_110046.1	3	-	25424591	25426418	1827	2	LOC100505947	Intergenic	RefSeq
p25247	0.000403029	8.6456e-07	0.443911	1370.58	809.041	1237.21	350.52	94.3113	1071.93	NR_033947.1	3	-	45719656	45730374	10718	3	LIMD1-AS1	Antisense	RefSeq
p25248	5.42849e-06	0.00976071	1	4.39025	4.39025	4.39025	4.39025	4.39025	4.39025	NR_027331.1	3	-	52096109	52099128	3019	1	C3orf74	Intergenic	RefSeq
p25250	4.34225e-09	0.000690962	1.99271	116.338	13.7194	134.412	124.959	168.273	233.78	XR_171084.1	3	-	53061674	53079338	17664	3	LOC101059928	Intronic	RefSeq
p25256	0.104541	1.98173e-08	1.53658	1357.52	210.575	887.863	1219.51	810.762	1743.51	XR_158772.1	3	-	132088065	132099299	11234	2	LOC100996371	Divergent	RefSeq
p25272	2.84785e-07	0.00131775	1.09951	102.254	89.0968	157.707	170.295	93.4809	120.016	NR_046701.1	3	+	64089145	64092034	2889	4	PRICKLE2-AS2	Intronic	RefSeq
p25275	1.75671e-05	1.63716e-08	1	4.39025	4.39025	4.39025	4.39025	4.39025	4.39025	XR_158766.1	3	+	119814476	119818200	3724	2	LOC100996310	Intergenic	RefSeq
p25276	3.58236e-06	0.00152921	1.57497	408.457	211.628	42.2651	738.98	11.3648	292.838	NR_024618.1	3	+	122605359	122611263	5904	1	LOC100129550	Intergenic	RefSeq
p25277	2.05827e-10	0.000148039	1	4.39025	4.39025	4.39025	4.39025	4.39025	4.39025	XR_171034.1	3	+	125985644	126010368	24724	3	LOC644662	Intergenic	RefSeq
p25283	0.0124748	2.70543e-05	0.615142	220.901	203.047	218.12	67.8242	88.2524	238.886	XR_158774.1	3	+	139108650	139163446	54796	4	LOC100507291	Divergent	RefSeq
p25292	0.656606	7.351e-08	1.35365	324.028	326.881	21.7025	499.044	169.364	242.075	NR_024388.1	3	+	196669493	196670884	1391	1	LOC152217	Divergent	RefSeq
p26207	1.84654e-05	0.0143042	1.949	706.575	949.719	722.283	975.181	340.982	3319.68	uc003dpb.1	3	-	72084669	72149578	64909	7	AK097190	Intergenic	UCSC
p26209	0.0943883	5.33818e-12	1	4.39025	4.39025	4.39025	4.39025	4.39025	4.39025	uc003eda.1	3	-	119388380	119389600	1220	1	AK095366	Antisense	UCSC
p26210	0.224836	3.14422e-08	1	4.39025	4.39025	4.39025	4.39025	4.39025	4.39025	uc003edb.1	3	-	119389610	119391185	1575	2	AK095366	Intronic	UCSC
p26215	3.39248e-10	4.69656e-09	1	4.39025	4.39025	4.39025	4.39025	4.39025	4.39025	uc003fgn.1	3	-	169858399	169859958	1559	1	AY940074	Intronic	UCSC
p26218	1.50667e-06	7.88008e-07	1	4.39025	4.39025	4.39025	4.39025	4.39025	4.39025	uc011bsy.2	3	-	195370803	195371637	834	1	BC044310	Intergenic	UCSC
p26219	2.36965e-14	2.31047e-06	0.899878	1386.2	191.026	1392.76	1344.74	471.987	855.904	uc003fwf.1	3	-	195961239	195964785	3546	1	AF088041	Divergent	UCSC
p26221	9.62216e-11	0.158799	1	4.39025	4.39025	4.39025	4.39025	4.39025	4.39025	uc021wsk.1	3	+	4792016	4792369	353	1	EGOT	Intronic	UCSC
p26222	0.80582	4.99569e-08	2.03236	1059.6	52.7903	585.319	999.59	1194.74	1256.02	uc003bsv.1	3	+	9802397	9805087	2690	1	AX748417	Intronic	UCSC
p26224	1.61e-05	2.57944e-08	1.05294	202.354	226.31	233.011	154.594	102.914	439.193	uc003bwe.1	3	+	11577722	11580151	2429	1	AX748267	Intronic	UCSC
p26225	1.70647e-10	0.000790528	1	4.39025	4.39025	4.39025	4.39025	4.39025	4.39025	uc010hec.1	3	+	13652923	13653534	611	1	BC152379	Intronic	UCSC
p26228	0.199478	6.52576e-06	1.74166	329.57	318.829	35.2119	445.054	438.108	307.459	uc003cri.3	3	+	47455557	47457107	1550	2	BC067356	Antisense	UCSC
p26235	0.00137695	6.88394e-10	1.16162	78.1197	3.11957	81.3818	58.5507	53.6788	76.6751	uc003dwj.3	3	+	107149776	107182759	32983	3	BC042024	Intergenic	UCSC
p26238	3.98265e-06	0.886205	0.836855	106.832	45.5131	15.9991	14.4131	17.1963	109.27	uc011biz.1	3	+	119187784	119209565	21781	10	POGLUT1	Antisense	UCSC
p26244	4.82812e-09	0.00205031	1.22579	79.2033	70.5261	77.6817	75.3964	93.045	110.316	uc011btt.2	3	+	195869625	195887761	18136	3	LOC401109	Intergenic	UCSC
p26804	1.79584e-06	1.0694e-05	1.57924	125.017	91.6594	30.886	65.462	191.984	133.515	HIT000220665	3	-	178466874	178577328	110454	3	HIX0030737	Antisense	H-InvDB
p27494	4.44584e-07	1.98015e-08	0.725748	87.0566	98.0927	82.2423	26.297	39.3097	128.452	uc.483-	3	-	17592728	17593130	402	1	uc.483-	Intronic	UCR
p27501	3.11547e-08	0.00132563	1	4.39025	4.39025	4.39025	4.39025	4.39025	4.39025	uc.118-	3	-	70872091	70872310	219	1	uc.118-	Intergenic	UCR
p27503	2.29732e-05	5.29259e-09	1	4.39025	4.39025	4.39025	4.39025	4.39025	4.39025	uc.120-	3	-	114435038	114435308	270	1	uc.120-	Intronic	UCR
p27504	1.50038e-05	2.72615e-07	1.21776	110.505	25.3938	131.836	66.0957	26.5922	233.35	uc.121-	3	-	114575473	114575766	293	1	uc.121-	Intronic	UCR
p27514	6.84174e-08	0.00015821	1	4.39025	4.39025	4.39025	4.39025	4.39025	4.39025	uc.131-	3	-	157990039	157990246	207	1	uc.131-	Intronic	UCR
p27516	2.20724e-10	1.20004e-07	1.37791	114.284	22.678	51.0409	25.0268	47.3823	186.641	uc.133-	3	-	158026477	158026754	277	1	uc.133-	Intronic	UCR
p27521	0.000307336	2.17846e-08	1	4.39025	4.39025	4.39025	4.39025	4.39025	4.39025	uc.111+	3	+	9471460	9471756	296	1	uc.111+	Intronic	UCR
p27524	1.02956e-11	8.37098e-11	2.86034	665.896	40.2697	286.294	912.839	705.61	1220.32	uc.113+	3	+	18676403	18676650	247	1	uc.113+	Intergenic	UCR
p27526	5.4917e-10	0.000448158	1.06598	59.7808	95.8495	16.9856	75.4817	40.5865	67.9375	uc.115+	3	+	19034157	19034376	219	1	uc.115+	Intergenic	UCR
p27530	4.14056e-06	1.45271e-12	1	4.39025	4.39025	4.39025	4.39025	4.39025	4.39025	uc.119+	3	+	114433466	114433767	301	1	uc.119+	Intronic	UCR
p27532	1.9965e-08	0.0324849	1.32468	287.718	450.384	308.041	360.498	265.668	759.634	uc.121+	3	+	114575473	114575766	293	1	uc.121+	Intronic	UCR
p27533	9.6222e-11	1.03787e-06	1	4.39025	4.39025	4.39025	4.39025	4.39025	4.39025	uc.122+	3	+	114611890	114612105	215	1	uc.122+	Intronic	UCR
p27549	6.5159e-10	0.00836246	0.394535	2859.56	2124.3	4055	1290.68	382.768	1892.7	uc.138+	3	+	185649295	185649714	419	1	uc.138+	Intronic	UCR
p29338	1.44414e-05	0.0476048	1	4.39025	4.39025	4.39025	4.39025	4.39025	4.39025	ENST00000422481.1	3	-	14562198	14567490	5292	3	ENSG00000144596.7	Antisense	ENSEMBL
p29339	4.3924e-07	0.000361387	1	4.39025	4.39025	4.39025	4.39025	4.39025	4.39025	ENST00000421598.1	3	-	49586738	49591799	5061	3	ENSG00000226913.1	Divergent	ENSEMBL
p29349	0.096625	0.000133285	1.11189	95.2066	17.596	166.641	153.054	86.7695	70.8872	ENST00000453180.1	3	-	174797096	174833032	35936	4	ENSG00000230292.1	Antisense	ENSEMBL
p29351	5.81273e-10	0.205835	1	4.39025	4.39025	4.39025	4.39025	4.39025	4.39025	ENST00000475197.1	3	+	10326102	10327430	1328	1	ENSG00000231177.4	Divergent	ENSEMBL
p29352	3.11214e-10	2.05756e-10	2.7096	3238.31	2027.79	315.93	3156.07	4816.28	7152.71	ENST00000436602.1	3	+	15298961	15300563	1602	3	ENSG00000224660.1	Antisense	ENSEMBL
p29354	1.42791e-06	1.78441e-08	2.54198	65.7281	1.87315	4.69333	31.8562	97.0372	54.8776	ENST00000568686.1	3	+	44158790	44163857	5067	1	ENSG00000261786.1	Intergenic	ENSEMBL
p29355	2.0858e-05	0.00757362	1	4.39025	4.39025	4.39025	4.39025	4.39025	4.39025	ENST00000439898.1	3	+	50297734	50300790	3056	2	ENSG00000230454.1	Divergent	ENSEMBL
p29367	0.26321	0.0164955	1.0505	8084.78	2788.65	3773.98	4614.09	442.896	10330.2	ENST00000539717.1	3	+	195384937	195400708	15771	8	ENSG00000242086.3	Intergenic	ENSEMBL
p29368	4.95491e-07	3.37828e-06	1	4.39025	4.39025	4.39025	4.39025	4.39025	4.39025	ENST00000451982.2	3	+	195408149	195428368	20219	6	ENSG00000242086.3	Intergenic	ENSEMBL
p29370	1.38095e-07	3.17414e-06	1	4.39025	4.39025	4.39025	4.39025	4.39025	4.39025	ENST00000594446.1	3	+	195435024	195460249	25225	5	ENSG00000242086.3	Antisense	ENSEMBL
p29860	4.09019e-09	0.000150127	1	4.39025	4.39025	4.39025	4.39025	4.39025	4.39025	TCONS_00007118	3	-	13691791	13695339	3548	2	XLOC_003052	Intergenic	HumanLincRNACatalog
p29868	6.67953e-06	0.514339	0.948832	57.9797	88.9216	3.41566	45.1235	47.8315	49.6705	TCONS_00007281	3	-	150452255	150455302	3047	3	XLOC_003284	Intergenic	HumanLincRNACatalog
p29869	1.51432e-09	0.000168697	1.98149	88.2271	39.9484	2.27007	89.911	33.94	134.625	TCONS_00007315	3	-	181091677	181160296	68619	4	XLOC_003343	Intergenic	HumanLincRNACatalog
p30124	5.71148e-11	4.34295e-10	1	4.39025	4.39025	4.39025	4.39025	4.39025	4.39025	NR_027038.1	3	-	151980404	151987415	7011	2	LOC401093	Antisense	RefSeq
p30126	5.43096e-09	0.678156	1	4.39025	4.39025	4.39025	4.39025	4.39025	4.39025	XR_158775.1	3	+	139108658	139163446	54788	4	LOC100507291	Divergent	RefSeq
p30224	0.00208695	0.00273456	1.74696	81.9892	10.1503	42.9493	92.0668	53.4228	90.5058	uc011aws.2	3	-	25900022	25913973	13951	7	LOC285326	Intergenic	UCSC
p30271	0.141805	0.00238645	1	4.39025	4.39025	4.39025	4.39025	4.39025	4.39025	HIT000469042	3	-	10332510	10332804	294	1	HIX0003050	Intronic	H-InvDB
p30352	0.87047	0.794846	1	4.39025	4.39025	4.39025	4.39025	4.39025	4.39025	ENST00000565554.1	3	+	150181244	150184218	2974	1	ENSG00000261050.1	Intergenic	ENSEMBL
p33543	0.0293701	0.0945545	1	4.39025	4.39025	4.39025	4.39025	4.39025	4.39025	ENST00000437616.1	3	-	10049109	10052860	3751	3	ENSG00000206567.5	Antisense	ENSEMBL
p33544	0.918208	0.000243173	1	4.39025	4.39025	4.39025	4.39025	4.39025	4.39025	ENST00000454232.1	3	-	10049145	10052893	3748	3	ENSG00000206567.5	Antisense	ENSEMBL
p33545	9.93972e-11	0.0129928	1.07484	101.11	64.93	72.2587	64.8968	23.1187	168.117	ENST00000430219.1	3	-	14532677	14554366	21689	11	ENSG00000144596.7	Antisense	ENSEMBL
p33551	0.839077	0.000480099	1.37795	78.7822	23.5073	18.4697	33.167	56.6416	76.5918	ENST00000419213.1	3	+	50304989	50308889	3900	7	ENSG00000012171.13	Antisense	ENSEMBL
p33552	0.00325174	4.74483e-08	1	4.39025	4.39025	4.39025	4.39025	4.39025	4.39025	ENST00000454939.1	3	+	50306305	50314570	8265	16	ENSG00000012171.13	Antisense	ENSEMBL
p33554	0.22422	0.00565218	1	4.39025	4.39025	4.39025	4.39025	4.39025	4.39025	ENST00000418576.1	3	+	50310590	50314307	3717	11	ENSG00000012171.13	Antisense	ENSEMBL
p33555	1.06541e-06	0.000424341	0.506154	7983.14	2788.64	4639.52	360.649	1036.75	6403.1	ENST00000460744.1	3	+	111011565	111261149	249584	5	ENSG00000241177.1	Antisense	ENSEMBL
p33557	0.264392	0.529166	1	4.39025	4.39025	4.39025	4.39025	4.39025	4.39025	ENST00000425425.1	3	+	195384963	195391159	6196	4	ENSG00000242086.3	Intergenic	ENSEMBL
p33558	0.00151885	0.020195	2.4106	1371.61	154.345	194.227	1023.91	850.783	2271.99	ENST00000599566.1	3	+	195435024	195452058	17034	3	ENSG00000242086.3	Antisense	ENSEMBL
p33559	0.000279819	0.00547828	1	4.39025	4.39025	4.39025	4.39025	4.39025	4.39025	ENST00000595086.1	3	+	195435024	195460422	25398	4	ENSG00000242086.3	Antisense	ENSEMBL
p33701	6.20927e-09	0.30527	1	4.39025	4.39025	4.39025	4.39025	4.39025	4.39025	NR_024022.1	3	+	4345296	4358949	13653	3	SETMAR	Antisense	RefSeq
p33702	0.00778847	5.63308e-06	0.923028	323.697	351.107	396.407	490.791	62.2233	435.743	NR_037162.1	3	+	9851643	9878040	26397	11	TTLL3	Antisense	RefSeq
p33814	1.37343e-09	6.48252e-07	1	4.39025	4.39025	4.39025	4.39025	4.39025	4.39025	uc021wsx.1	3	-	10059174	10061778	2604	1	FW339974	Intergenic	UCSC
p33815	9.63846e-11	0.00114591	1	4.39025	4.39025	4.39025	4.39025	4.39025	4.39025	uc003est.1	3	-	138372859	138374624	1765	1	BC045790	Antisense	UCSC
p33816	1.50788e-09	7.69689e-06	1	4.39025	4.39025	4.39025	4.39025	4.39025	4.39025	uc021xie.1	3	+	183527224	183530409	3185	1	AX747114	Antisense	UCSC
p12216	0.000439365	0.0315096	1.4125	170.047	76.1362	89.4402	135.28	123.201	215.587	ENST00000598370.1	4	-	646638	647049	411	1	ENSG00000242686.2	Intronic	ENSEMBL
p12218	7.52898e-11	0.175899	1	4.39025	4.39025	4.39025	4.39025	4.39025	4.39025	ENST00000468356.1	4	-	647011	649434	2423	4	ENSG00000242686.2	Antisense	ENSEMBL
p12219	4.0264e-09	0.000533736	1.8041	106.082	79.8765	43.6021	149.427	115.651	149.074	ENST00000489312.1	4	-	647522	649266	1744	2	ENSG00000242686.2	Antisense	ENSEMBL
p12220	0.000432758	0.410494	1	4.39025	4.39025	4.39025	4.39025	4.39025	4.39025	ENST00000502923.1	4	-	716063	717823	1760	2	ENSG00000248416.1	Intronic	ENSEMBL
p12224	0.00383597	3.08399e-08	1.60212	4600.6	3329.81	127.148	1765.75	4769.57	6373.85	ENST00000503185.1	4	-	773936	775637	1701	2	ENSG00000249592.1	Intergenic	ENSEMBL
p12225	1.03224e-10	0.494551	1.53007	1378.49	803.183	872.978	819.086	910.801	2943.94	ENST00000503405.1	4	-	774033	775637	1604	2	ENSG00000249592.1	Intergenic	ENSEMBL
p12227	0.00359785	2.48911e-07	1	4.39025	4.39025	4.39025	4.39025	4.39025	4.39025	ENST00000466692.1	4	-	1575788	1581980	6192	2	ENSG00000244459.2	Intergenic	ENSEMBL
p12231	1.23981e-08	7.88821e-06	1.28409	1429.87	463.861	1265.42	1250	712.32	2094.3	ENST00000515487.1	4	-	4477847	4483427	5580	4	ENSG00000248221.1	Intronic	ENSEMBL
p12234	5.34097e-05	0.000268563	2.02178	96.6921	118.561	11.2034	169.43	195.121	93.2946	ENST00000504402.1	4	-	7096297	7105056	8759	3	ENSG00000245562.2	Intergenic	ENSEMBL
p12238	2.82629e-08	3.66481e-06	0.709302	202.52	270.608	251.975	107.09	83.0672	324.159	ENST00000515186.1	4	-	8455136	8456669	1533	2	ENSG00000251186.1	Antisense	ENSEMBL
p12240	5.9277e-07	0.7365	0.797263	201.5	262.846	241.171	236.552	20.0965	305.834	ENST00000557144.1	4	-	8860440	8862553	2113	2	ENSG00000258507.1	Intergenic	ENSEMBL
p12241	0.0045528	0.365323	0.840888	1014.15	997.565	1411.47	951.123	961.303	966.089	ENST00000561486.1	4	-	10069712	10074643	4931	2	ENSG00000261490.1	Intergenic	ENSEMBL
p12247	1.55193e-07	6.67635e-10	1	4.39025	4.39025	4.39025	4.39025	4.39025	4.39025	ENST00000500394.2	4	-	14911584	15003669	92085	8	ENSG00000247624.2	Divergent	ENSEMBL
p12250	0.00205327	8.59628e-08	0.90354	137.895	182.724	74.5038	89.72	181.839	85.4508	ENST00000513384.1	4	-	15008070	15229584	221514	5	ENSG00000249252.1	Antisense	ENSEMBL
p12251	0.00567513	4.9901e-05	1.35801	1394.56	655.487	938.879	982.141	713.536	2363.3	ENST00000515495.1	4	-	15359764	15421656	61892	4	ENSG00000251379.1	Intronic	ENSEMBL
p12254	1.59921e-06	0.0382823	1	4.39025	4.39025	4.39025	4.39025	4.39025	4.39025	ENST00000511010.1	4	-	17589089	17616194	27105	3	ENSG00000249502.1	Antisense	ENSEMBL
p12256	7.73491e-09	0.00500475	1.25079	81.3353	49.8257	68.0921	92.5959	75.1334	81.4947	ENST00000505347.1	4	-	19173957	19458617	284660	3	ENSG00000248238.1	Intergenic	ENSEMBL
p12258	0.63496	0.00446433	1	4.39025	4.39025	4.39025	4.39025	4.39025	4.39025	ENST00000507666.1	4	-	23724884	23735202	10318	4	ENSG00000251292.1	Intergenic	ENSEMBL
p12261	0.000591033	4.10476e-06	1.40509	327.528	228.168	12.7514	154.371	205.086	439.261	ENST00000506878.1	4	-	27135617	27141673	6056	3	ENSG00000251080.1	Intergenic	ENSEMBL
p12269	3.37546e-08	9.33548e-07	1	4.39025	4.39025	4.39025	4.39025	4.39025	4.39025	ENST00000514877.1	4	-	34125127	34271369	146242	4	ENSG00000248685.1	Intergenic	ENSEMBL
p12276	2.84792e-05	4.12079e-10	1	4.39025	4.39025	4.39025	4.39025	4.39025	4.39025	ENST00000515128.1	4	-	36550505	36584352	33847	2	ENSG00000248215.1	Intergenic	ENSEMBL
p12277	0.00571005	1.55512e-11	0.877548	303.073	474.517	229.233	291.063	76.6758	515.798	ENST00000503034.1	4	-	37589708	37590497	789	2	ENSG00000248936.1	Antisense	ENSEMBL
p12281	1.33438e-10	0.0725762	1	4.39025	4.39025	4.39025	4.39025	4.39025	4.39025	ENST00000504219.1	4	-	38621310	38626196	4886	2	ENSG00000231160.4	Intergenic	ENSEMBL
p12284	0.630156	6.15031e-10	1.02497	118.316	7.31463	167.243	165.994	40.3852	93.808	ENST00000510073.1	4	-	41255899	41258738	2839	2	ENSG00000251173.1	Divergent	ENSEMBL
p12302	8.45748e-10	4.4548e-06	1	4.39025	4.39025	4.39025	4.39025	4.39025	4.39025	ENST00000510637.1	4	-	56232767	56251747	18980	4	ENSG00000249700.3	Antisense	ENSEMBL
p12306	0.000101313	0.170098	1.00693	100.175	53.8413	88.7183	140.156	22.6817	81.5791	ENST00000602820.1	4	-	57827092	57827539	447	1	ENSG00000269949.1	Intergenic	ENSEMBL
p12341	3.56952e-10	3.83652e-11	0.915259	51.1484	25.6298	24.2741	29.1935	30.241	33.0545	ENST00000513871.1	4	-	78315644	78415440	99796	3	ENSG00000249036.1	Intergenic	ENSEMBL
p12343	1.9384e-09	2.67261e-08	1	4.39025	4.39025	4.39025	4.39025	4.39025	4.39025	ENST00000503589.1	4	-	81104433	81111323	6890	2	ENSG00000248719.1	Antisense	ENSEMBL
p12349	0.00488797	8.75023e-10	1.59045	109.821	100.863	5.19748	184.708	97.9223	60.7185	ENST00000504520.1	4	-	83814638	83822113	7475	5	ENSG00000251022.1	Antisense	ENSEMBL
p12351	1.80602e-12	2.15167e-10	0.772182	5128.83	2688.79	1341.95	3712.19	448.915	2911.75	ENST00000512932.1	4	-	83815402	83821712	6310	3	ENSG00000251022.1	Divergent	ENSEMBL
p12352	1.23223e-11	0.000722618	2.15591	3220.91	617.191	876.627	4004.85	4165.69	1993.99	ENST00000511271.1	4	-	83815947	83821719	5772	4	ENSG00000251022.1	Divergent	ENSEMBL
p12355	0.101089	3.08436e-06	1.61213	665.096	49.2376	872.736	913.438	969.58	675.551	ENST00000509007.1	4	-	83820697	83821712	1015	3	ENSG00000251022.1	Divergent	ENSEMBL
p12357	5.70186e-05	0.000109358	1.11009	1131.2	65.4133	1276.01	728.643	1108.51	907.687	ENST00000503704.1	4	-	83820975	83821722	747	2	ENSG00000251022.1	Divergent	ENSEMBL
p12364	9.22187e-11	2.69423e-08	1	4.39025	4.39025	4.39025	4.39025	4.39025	4.39025	ENST00000564854.1	4	-	86933448	86935027	1579	1	ENSG00000261496.1	Intergenic	ENSEMBL
p12365	1.74406e-10	0.633792	1.27366	215.051	296.15	254.581	270.599	185.502	519.244	ENST00000506274.1	4	-	88140675	88161466	20791	2	ENSG00000250163.1	Antisense	ENSEMBL
p12372	2.43815e-08	0.0783265	1.66314	196.473	136.285	79.6573	32.858	257.813	395.231	ENST00000502518.1	4	-	93189917	93198226	8309	2	ENSG00000249152.1	Intergenic	ENSEMBL
p12376	0.00973521	0.493865	1.01108	127.655	139.951	103.619	73.1266	175.374	126.836	ENST00000510795.1	4	-	95664950	95678684	13734	3	ENSG00000249599.1	Divergent	ENSEMBL
p12380	1.14494e-05	2.12881e-07	1	4.39025	4.39025	4.39025	4.39025	4.39025	4.39025	ENST00000508578.1	4	-	100515955	100547070	31115	4	ENSG00000248676.1	Antisense	ENSEMBL
p12385	0.00928499	0.457276	0.539786	99.3277	154.476	9.55026	22.1475	81.8942	38.1131	ENST00000512915.1	4	-	103339873	103371167	31294	4	ENSG00000248161.1	Intergenic	ENSEMBL
p12387	4.06207e-09	0.000157772	1	4.39025	4.39025	4.39025	4.39025	4.39025	4.39025	ENST00000563833.1	4	-	103421997	103422476	479	1	ENSG00000260651.1	Divergent	ENSEMBL
p12389	9.62716e-11	5.69858e-08	1	4.39025	4.39025	4.39025	4.39025	4.39025	4.39025	ENST00000515127.1	4	-	105575030	105887950	312920	6	ENSG00000248242.1	Intergenic	ENSEMBL
p12391	0.0131672	4.14692e-11	1	4.39025	4.39025	4.39025	4.39025	4.39025	4.39025	ENST00000515414.1	4	-	106092510	106099220	6710	5	ENSG00000251586.1	Intronic	ENSEMBL
p12399	4.29532e-10	0.000855975	1.44889	709.389	851.036	416.571	838.636	550.342	1475.47	ENST00000509984.1	4	-	109477256	109541551	64295	3	ENSG00000234492.4	Divergent	ENSEMBL
p12414	0.0643613	0.00619749	1	4.39025	4.39025	4.39025	4.39025	4.39025	4.39025	ENST00000508959.1	4	-	113900745	113993118	92373	3	ENSG00000248152.1	Intronic	ENSEMBL
p12419	6.04354e-09	0.00147633	0.9569	49.3753	23.3052	71.1106	48.0415	67.7588	21.7935	ENST00000503597.1	4	-	117411231	117412356	1125	2	ENSG00000250791.1	Intergenic	ENSEMBL
p12431	1.73726e-08	1.25146e-09	1.11248	62.0483	17.968	97.4394	58.8982	83.5654	54.9528	ENST00000565254.1	4	-	128761352	128765195	3843	1	ENSG00000261668.1	Intergenic	ENSEMBL
p12436	0.000244283	0.0571005	0.825685	58.3451	86.8284	65.4819	36.851	91.9513	45.1327	ENST00000509105.1	4	-	130669271	130692636	23365	6	ENSG00000246876.2	Intergenic	ENSEMBL
p12438	0.0105293	0.963488	1.83314	209.389	83.9897	152.39	258.044	113.064	446.048	ENST00000510592.1	4	-	132851185	132897107	45922	3	ENSG00000251555.1	Intergenic	ENSEMBL
p12442	0.317592	2.66558e-05	1	4.39025	4.39025	4.39025	4.39025	4.39025	4.39025	ENST00000506897.1	4	-	133996465	134017981	21516	5	ENSG00000250241.1	Intergenic	ENSEMBL
p12459	2.67981e-05	3.03601e-06	1	4.39025	4.39025	4.39025	4.39025	4.39025	4.39025	ENST00000505454.1	4	-	138566418	138576328	9910	4	ENSG00000250126.1	Intergenic	ENSEMBL
p12461	0.00349194	4.31716e-07	1	4.39025	4.39025	4.39025	4.39025	4.39025	4.39025	ENST00000514600.1	4	-	138948575	139051839	103264	11	ENSG00000248307.1	Intergenic	ENSEMBL
p12464	2.78864e-06	0.000507339	1.71575	85.4569	1.6698	33.0999	56.809	64.4515	85.018	ENST00000512536.1	4	-	139019343	139051863	32520	4	ENSG00000248307.1	Intergenic	ENSEMBL
p12474	3.52238e-05	3.01124e-10	1	4.39025	4.39025	4.39025	4.39025	4.39025	4.39025	ENST00000506645.1	4	-	142240603	142244716	4113	2	ENSG00000248810.1	Intergenic	ENSEMBL
p12475	1.4342e-07	1.40446e-08	1.65091	654.97	769.232	403.586	989.264	221.354	1806.89	ENST00000509161.1	4	-	142242282	142247161	4879	2	ENSG00000248810.1	Intergenic	ENSEMBL
p12489	1.43384e-10	6.55716e-09	0.616738	58.1802	12.412	96.1696	24.4226	19.376	59.0497	ENST00000515703.1	4	-	147031974	147032869	895	3	ENSG00000248809.1	Intergenic	ENSEMBL
p12502	0.000278286	0.000209044	1	4.39025	4.39025	4.39025	4.39025	4.39025	4.39025	ENST00000508847.1	4	-	152328702	152329987	1285	2	ENSG00000251611.1	Divergent	ENSEMBL
p12510	6.79691e-05	5.80422e-06	1	4.39025	4.39025	4.39025	4.39025	4.39025	4.39025	ENST00000513660.2	4	-	156207313	156208288	975	2	ENSG00000249924.2	Intergenic	ENSEMBL
p12515	1.22348e-07	1.30218e-08	2.356	2737.16	19.7724	1686.68	2756.77	3028.02	4684.39	ENST00000514134.1	4	-	167309852	167447271	137419	4	ENSG00000249675.1	Intergenic	ENSEMBL
p12518	0.520345	0.000136918	1.06909	137.124	97.6163	120.292	174.556	96.9568	108.048	ENST00000507842.1	4	-	169569046	169569738	692	3	ENSG00000249623.1	Intronic	ENSEMBL
p12526	0.711778	0.151029	0.7602	322.996	73.9925	313.756	11.9975	162.053	366.258	ENST00000507803.1	4	-	174243356	174250845	7489	3	ENSG00000248774.1	Antisense	ENSEMBL
p12529	6.81026e-06	0.00177737	0.487453	61.3716	84.5497	72.1017	8.80677	52.9866	44.4825	ENST00000502956.1	4	-	174817544	174833046	15502	4	ENSG00000250043.1	Intergenic	ENSEMBL
p12531	0.00131709	0.00716885	1	4.39025	4.39025	4.39025	4.39025	4.39025	4.39025	ENST00000503325.1	4	-	174903769	174912012	8243	3	ENSG00000251216.1	Intergenic	ENSEMBL
p12540	9.8073e-11	0.000552779	1	4.39025	4.39025	4.39025	4.39025	4.39025	4.39025	ENST00000506984.1	4	-	176379439	176387848	8409	3	ENSG00000249945.1	Intergenic	ENSEMBL
p12558	9.64886e-11	0.605879	1	4.39025	4.39025	4.39025	4.39025	4.39025	4.39025	ENST00000513255.1	4	-	183693717	183695084	1367	2	ENSG00000248694.1	Antisense	ENSEMBL
p12560	3.55203e-06	3.13449e-08	1.15671	96.8625	110.779	77.1299	137.836	80.5536	111.008	ENST00000457303.3	4	-	184416090	184425647	9557	3	ENSG00000232648.3	Divergent	ENSEMBL
p12562	0.00443229	1.09221e-07	1.62582	124.224	104.207	125.474	196.668	92.2237	286.493	ENST00000511465.1	4	-	185262842	185269065	6223	2	ENSG00000180712.3	Intergenic	ENSEMBL
p12577	0.000222348	0.0137033	0.651769	632.372	509.147	909.329	335.234	182.418	819.028	ENST00000513304.1	4	+	124403	127532	3129	2	ENSG00000250312.2	Intronic	ENSEMBL
p12579	0.00149116	2.67773e-07	1	4.39025	4.39025	4.39025	4.39025	4.39025	4.39025	ENST00000510175.1	4	+	124419	157779	33360	2	ENSG00000250312.2	Antisense	ENSEMBL
p12580	0.20947	7.98974e-05	1	4.39025	4.39025	4.39025	4.39025	4.39025	4.39025	ENST00000503095.1	4	+	1021465	1022760	1295	2	ENSG00000250259.1	Divergent	ENSEMBL
p12582	0.135575	3.23774e-06	1	4.39025	4.39025	4.39025	4.39025	4.39025	4.39025	ENST00000507044.1	4	+	1243087	1244234	1147	2	ENSG00000196810.4	Divergent	ENSEMBL
p12583	1.45565e-06	0.803119	1	4.39025	4.39025	4.39025	4.39025	4.39025	4.39025	ENST00000578730.1	4	+	1243238	1282079	38841	3	ENSG00000196810.4	Divergent	ENSEMBL
p12587	0.574875	0.432993	1	4.39025	4.39025	4.39025	4.39025	4.39025	4.39025	ENST00000505364.1	4	+	1246778	1259951	13173	2	ENSG00000196810.4	Intergenic	ENSEMBL
p12593	7.79013e-07	0.0588782	1	4.39025	4.39025	4.39025	4.39025	4.39025	4.39025	ENST00000382849.2	4	+	2420700	2430972	10272	3	ENSG00000206113.2	Antisense	ENSEMBL
p12596	5.84629e-06	1.83433e-07	2.12867	338.529	130.469	29.6944	408.98	229.73	422.84	ENST00000505731.1	4	+	2936625	2949400	12775	5	ENSG00000249673.1	Antisense	ENSEMBL
p12597	0.166233	0.0617166	0.760879	3448.82	2859.89	4574.21	3987.03	733.497	3560.06	ENST00000507999.1	4	+	2936666	2942231	5565	5	ENSG00000249673.1	Antisense	ENSEMBL
p12598	0.00469299	0.76322	1	4.39025	4.39025	4.39025	4.39025	4.39025	4.39025	ENST00000515194.1	4	+	2937272	2952794	15522	4	ENSG00000249673.1	Antisense	ENSEMBL
p12600	1.04165e-08	5.97327e-07	1.50085	64.5129	40.6247	24.9578	86.706	27.2956	81.2514	ENST00000602641.1	4	+	3546281	3550315	4034	3	ENSG00000270090.1	Intergenic	ENSEMBL
p12606	5.82438e-06	4.62705e-11	1	4.39025	4.39025	4.39025	4.39025	4.39025	4.39025	ENST00000502693.1	4	+	4543966	4639631	95665	3	ENSG00000247708.2	Divergent	ENSEMBL
p12610	0.000122726	1.07127e-05	1	4.39025	4.39025	4.39025	4.39025	4.39025	4.39025	ENST00000441093.1	4	+	6997067	7000685	3618	2	ENSG00000187904.3	Antisense	ENSEMBL
p12632	0.35575	0.000195238	1	4.39025	4.39025	4.39025	4.39025	4.39025	4.39025	ENST00000505628.1	4	+	14236872	14244436	7564	3	ENSG00000249988.1	Intergenic	ENSEMBL
p12650	1.59504e-10	3.37804e-06	1	4.39025	4.39025	4.39025	4.39025	4.39025	4.39025	ENST00000503394.1	4	+	23107124	23125110	17986	5	ENSG00000249645.1	Intergenic	ENSEMBL
p12652	2.37164e-10	0.0965751	1.49359	1069.45	563.016	474.335	160.672	953.56	2032.47	ENST00000499715.2	4	+	23764549	23770248	5699	2	ENSG00000250137.1	Intergenic	ENSEMBL
p12655	0.0372529	1.28224e-05	0.920086	110.224	180.423	83.4438	49.2278	193.327	101.641	ENST00000515188.1	4	+	25610332	25621087	10755	2	ENSG00000248545.1	Intergenic	ENSEMBL
p12657	0.000167076	9.83538e-05	1	4.39025	4.39025	4.39025	4.39025	4.39025	4.39025	ENST00000512873.1	4	+	27219100	27283847	64747	6	ENSG00000249699.1	Intergenic	ENSEMBL
p12665	0.00319935	0.00080104	1	4.39025	4.39025	4.39025	4.39025	4.39025	4.39025	ENST00000513211.1	4	+	31999018	32157028	158010	3	ENSG00000251129.1	Intergenic	ENSEMBL
p12668	1.72705e-07	0.455586	1.74003	282.818	33.0688	257.951	354.532	288.986	354.976	ENST00000504795.1	4	+	33852212	33893771	41559	4	ENSG00000250723.1	Intergenic	ENSEMBL
p12680	9.62244e-11	0.000617654	1	4.39025	4.39025	4.39025	4.39025	4.39025	4.39025	ENST00000501725.2	4	+	37080203	37112665	32462	3	ENSG00000247810.2	Intergenic	ENSEMBL
p12681	1.16961e-07	6.13711e-05	1	4.39025	4.39025	4.39025	4.39025	4.39025	4.39025	ENST00000503465.1	4	+	38368534	38387380	18846	2	ENSG00000248227.1	Intergenic	ENSEMBL
p12682	2.2898e-10	2.28132e-09	1	4.39025	4.39025	4.39025	4.39025	4.39025	4.39025	ENST00000507056.1	4	+	38511387	38519677	8290	3	ENSG00000249667.1	Intergenic	ENSEMBL
p12684	0.308302	1.73485e-10	1.85611	756.41	365.568	406.848	738.823	712.471	1386.37	ENST00000507579.1	4	+	39135532	39137228	1696	2	ENSG00000249685.1	Intergenic	ENSEMBL
p12687	0.331089	7.85301e-09	1	4.39025	4.39025	4.39025	4.39025	4.39025	4.39025	ENST00000526807.1	4	+	39654823	39668264	13441	2	ENSG00000255458.1	Intergenic	ENSEMBL
p12689	0.976767	3.90667e-06	1	4.39025	4.39025	4.39025	4.39025	4.39025	4.39025	ENST00000567102.1	4	+	40168294	40169451	1157	1	ENSG00000260296.1	Intergenic	ENSEMBL
p12692	0.00690418	3.35062e-11	2.09866	109.695	2.97026	60.5763	114.513	53.2804	195.782	ENST00000514187.1	4	+	40428135	40429602	1467	2	ENSG00000250893.1	Antisense	ENSEMBL
p12701	4.18628e-09	6.22117e-06	1.54746	641.792	196.139	36.1605	56.9288	26.9575	1268.74	ENST00000507639.1	4	+	44018877	44022273	3396	2	ENSG00000251350.1	Intergenic	ENSEMBL
p12702	0.619727	4.47584e-12	1	4.39025	4.39025	4.39025	4.39025	4.39025	4.39025	ENST00000512678.1	4	+	44019078	44024080	5002	2	ENSG00000251350.1	Intergenic	ENSEMBL
p12707	0.709389	3.08208e-05	0.96805	1336.31	762.477	1072.21	873.694	860.811	1335.18	ENST00000441504.1	4	+	53578664	53579296	632	2	ENSG00000226950.2	Intergenic	ENSEMBL
p12711	0.0348211	0.00848823	1	4.39025	4.39025	4.39025	4.39025	4.39025	4.39025	ENST00000504048.1	4	+	53811832	53814919	3087	2	ENSG00000248115.1	Intronic	ENSEMBL
p12744	0.00540845	1.44593e-09	1.2982	170.4	182.873	23.0518	147.679	158.104	182.76	ENST00000507117.1	4	+	66536326	66563747	27421	2	ENSG00000250846.2	Divergent	ENSEMBL
p12746	2.73759e-09	0.000150115	1	4.39025	4.39025	4.39025	4.39025	4.39025	4.39025	ENST00000507344.1	4	+	66724478	66725922	1444	2	ENSG00000251527.1	Intergenic	ENSEMBL
p12755	0.342183	1.74151e-12	0.892909	332.884	71.6221	475.721	476.282	142.403	167.278	ENST00000504301.1	4	+	70047817	70080193	32376	5	ENSG00000250696.1	Antisense	ENSEMBL
p12760	0.330808	1.84403e-05	1.1042	79.9673	91.3695	20.6042	94.0083	71.9664	45.9669	ENST00000508147.1	4	+	74375915	74394439	18524	2	ENSG00000250436.1	Intergenic	ENSEMBL
p12764	3.88111e-09	0.000164071	1	4.39025	4.39025	4.39025	4.39025	4.39025	4.39025	ENST00000438151.2	4	+	76751903	76753858	1955	1	ENSG00000229717.2	Intergenic	ENSEMBL
p12766	2.04177e-10	1.01121e-10	1.26682	60.4197	9.98299	40.4055	83.4621	3.47906	53.4325	ENST00000515589.1	4	+	77157421	77177613	20192	2	ENSG00000248325.1	Intronic	ENSEMBL
p12768	6.91365e-05	1.32529e-05	1	4.39025	4.39025	4.39025	4.39025	4.39025	4.39025	ENST00000503259.1	4	+	79567056	79584458	17402	3	ENSG00000251442.1	Intergenic	ENSEMBL
p12769	0.000111887	3.94035e-08	1	4.39025	4.39025	4.39025	4.39025	4.39025	4.39025	ENST00000507802.1	4	+	79567147	79602049	34902	4	ENSG00000251442.1	Intergenic	ENSEMBL
p12770	0.000197415	4.83239e-07	1	4.39025	4.39025	4.39025	4.39025	4.39025	4.39025	ENST00000514130.1	4	+	79567242	79584298	17056	4	ENSG00000251442.1	Intergenic	ENSEMBL
p12772	0.0157667	0.0352505	0.810271	320.777	52.3208	381.846	99.3922	362.883	149.434	ENST00000510667.1	4	+	79892901	80229626	336725	4	ENSG00000249307.1	Intergenic	ENSEMBL
p12776	8.84437e-07	0.0175952	1	4.39025	4.39025	4.39025	4.39025	4.39025	4.39025	ENST00000437737.3	4	+	80132834	80166686	33852	2	ENSG00000249307.1	Intergenic	ENSEMBL
p12779	0.0475773	4.80549e-08	1	4.39025	4.39025	4.39025	4.39025	4.39025	4.39025	ENST00000515544.1	4	+	80413746	80497612	83866	4	ENSG00000250334.1	Intergenic	ENSEMBL
p12783	5.49054e-07	3.39033e-05	0.744077	98.7871	195.535	80.1181	133.813	37.7655	107.034	ENST00000514836.1	4	+	80748688	80798924	50236	3	ENSG00000251321.1	Intergenic	ENSEMBL
p12791	2.60479e-10	2.89184e-09	1	4.39025	4.39025	4.39025	4.39025	4.39025	4.39025	ENST00000506864.1	4	+	90472506	90612524	140018	4	ENSG00000251095.2	Intergenic	ENSEMBL
p12801	1.23408e-06	0.000468205	0.809009	104.655	65.5581	108.768	2.45943	90.2021	133.037	ENST00000517407.1	4	+	98041851	98056210	14359	2	ENSG00000253170.1	Intergenic	ENSEMBL
p12807	0.0169404	1.16509e-07	1	4.39025	4.39025	4.39025	4.39025	4.39025	4.39025	ENST00000506160.1	4	+	100082940	100202398	119458	5	ENSG00000246090.2	Antisense	ENSEMBL
p12817	0.00879946	0.00394617	1	4.39025	4.39025	4.39025	4.39025	4.39025	4.39025	ENST00000513793.1	4	+	104177315	104374815	197500	4	ENSG00000248740.1	Intergenic	ENSEMBL
p12829	1.72429e-06	4.28288e-06	1	4.39025	4.39025	4.39025	4.39025	4.39025	4.39025	ENST00000510406.1	4	+	106616680	106629242	12562	6	ENSG00000249823.1	Antisense	ENSEMBL
p12830	5.53396e-07	2.46754e-12	0.909021	118.181	37.6072	146.512	94.329	149.081	31.3872	ENST00000508961.1	4	+	106621290	106629250	7960	3	ENSG00000249823.1	Intronic	ENSEMBL
p12833	0.0294839	0.000129532	1	4.39025	4.39025	4.39025	4.39025	4.39025	4.39025	ENST00000508266.1	4	+	109092926	109094924	1998	2	ENSG00000232021.2	Intergenic	ENSEMBL
p12836	0.0735542	8.61421e-07	1	4.39025	4.39025	4.39025	4.39025	4.39025	4.39025	ENST00000508286.1	4	+	109094574	109097586	3012	3	ENSG00000232021.2	Intergenic	ENSEMBL
p12844	7.65104e-06	3.89272e-09	1.03626	223.568	172.29	176.714	91.6647	264.035	237.633	ENST00000420701.1	4	+	118281780	118293754	11974	4	ENSG00000228358.1	Intergenic	ENSEMBL
p12848	0.00622141	4.37403e-10	1	4.39025	4.39025	4.39025	4.39025	4.39025	4.39025	ENST00000600624.1	4	+	118492909	118610279	117370	4	ENSG00000236922.4	Intergenic	ENSEMBL
p12852	3.39209e-07	1.28337e-05	1.11961	1027.38	1251.24	1435.24	1399.9	503.294	2254.87	ENST00000506942.1	4	+	120377504	120378432	928	2	ENSG00000250950.1	Intergenic	ENSEMBL
p12858	0.0360289	1.20787e-08	0.690427	77.0607	86.5854	79.4798	65.1592	73.9649	28.7367	ENST00000506100.1	4	+	121560244	121571943	11699	2	ENSG00000249409.1	Intergenic	ENSEMBL
p12859	8.04395e-07	6.67569e-06	1	4.39025	4.39025	4.39025	4.39025	4.39025	4.39025	ENST00000505556.1	4	+	121560263	121571951	11688	2	ENSG00000249409.1	Intergenic	ENSEMBL
p12865	1.46949e-08	0.314505	1	4.39025	4.39025	4.39025	4.39025	4.39025	4.39025	ENST00000511919.1	4	+	124571445	124851509	280064	6	ENSG00000249464.1	Intergenic	ENSEMBL
p12871	0.000284176	0.263898	0.798935	66.1464	74.8335	96.5127	93.1849	55.2531	41.3031	ENST00000509834.2	4	+	129214087	129396151	182064	5	ENSG00000251432.2	Intergenic	ENSEMBL
p12885	1.57251e-05	0.000156627	0.873536	137.929	126.459	186.684	93.077	172.727	128.224	ENST00000503009.1	4	+	135345021	135379007	33986	3	ENSG00000251291.1	Intergenic	ENSEMBL
p12886	1.55399e-09	0.895011	1	4.39025	4.39025	4.39025	4.39025	4.39025	4.39025	ENST00000504882.1	4	+	135680553	135738444	57891	5	ENSG00000249000.1	Intergenic	ENSEMBL
p12888	1.06819e-06	7.54116e-06	0.85594	3262.28	2940.41	4454.09	1903.58	1362.77	5855.21	ENST00000514526.1	4	+	135988387	136018813	30426	4	ENSG00000248434.1	Intergenic	ENSEMBL
p12895	3.95931e-11	2.8501e-05	0.718475	126.75	191.225	142.155	85.5584	70.2546	174.778	ENST00000510767.1	4	+	139010167	139099331	89164	7	ENSG00000250033.1	Antisense	ENSEMBL
p12897	0.156481	0.0002921	0.897289	78.1017	30.2886	3.66391	49.4445	23.4806	27.6198	ENST00000514752.1	4	+	139026872	139090561	63689	2	ENSG00000250033.1	Antisense	ENSEMBL
p12902	0.0784228	0.000404172	1	4.39025	4.39025	4.39025	4.39025	4.39025	4.39025	ENST00000510736.1	4	+	139230895	139345303	114408	4	ENSG00000251372.1	Intergenic	ENSEMBL
p12908	1.06944e-09	9.77052e-07	1	4.39025	4.39025	4.39025	4.39025	4.39025	4.39025	ENST00000514766.1	4	+	143435598	143440136	4538	2	ENSG00000251248.1	Intronic	ENSEMBL
p12909	4.09277e-10	0.0736058	1	4.39025	4.39025	4.39025	4.39025	4.39025	4.39025	ENST00000509497.1	4	+	143487171	143582103	94932	3	ENSG00000249806.1	Intronic	ENSEMBL
p12910	4.39353e-05	2.48117e-05	0.581086	1037.81	531.041	1308.07	448.346	881.786	341.607	ENST00000499587.2	4	+	144621409	144786225	164816	7	ENSG00000246448.2	Antisense	ENSEMBL
p12911	0.540368	1.16568e-05	1.56827	118.192	118.09	51.7169	177.291	182.621	91.7476	ENST00000509873.1	4	+	144833483	144903607	70124	7	ENSG00000251600.1	Intergenic	ENSEMBL
p12916	6.67591e-07	0.000202063	1.44813	168.842	106.412	75.4313	152.363	161.01	194.465	ENST00000504710.1	4	+	146520260	146521704	1444	2	ENSG00000248686.1	Intergenic	ENSEMBL
p12925	1.46686e-05	1.25932e-10	1	4.39025	4.39025	4.39025	4.39025	4.39025	4.39025	ENST00000504874.1	4	+	149614183	149615475	1292	2	ENSG00000250357.1	Intergenic	ENSEMBL
p12927	0.000753304	0.466512	1.13366	79.134	57.3511	3.96227	51.9937	47.7022	59.5231	ENST00000505781.1	4	+	150587208	150632301	45093	3	ENSG00000250905.1	Intergenic	ENSEMBL
p12929	2.26808e-06	1.08644e-06	1	4.39025	4.39025	4.39025	4.39025	4.39025	4.39025	ENST00000507934.1	4	+	151500240	151502697	2457	2	ENSG00000249690.1	Intronic	ENSEMBL
p12933	1.00288e-10	2.74799e-06	1.48238	83.6413	45.5155	43.9841	86.8069	62.5037	107.35	ENST00000515329.1	4	+	152877142	152890533	13391	2	ENSG00000251249.1	Intergenic	ENSEMBL
p12938	7.52628e-07	0.0229475	2.24768	638.46	3.23317	490.398	481.783	99.4557	1963.34	ENST00000515789.1	4	+	153587519	153591259	3740	2	ENSG00000248571.1	Intronic	ENSEMBL
p12939	1.06774e-07	0.000203416	1	4.39025	4.39025	4.39025	4.39025	4.39025	4.39025	ENST00000515232.1	4	+	153955362	154012317	56955	5	ENSG00000249022.1	Intergenic	ENSEMBL
p12941	0.00058768	3.44488e-05	0.595316	164.677	100.398	151.334	161.631	5.27681	80.9868	ENST00000598252.1	4	+	156226118	156281498	55380	5	ENSG00000250910.2	Antisense	ENSEMBL
p12942	3.03286e-10	1.49276e-07	1	4.39025	4.39025	4.39025	4.39025	4.39025	4.39025	ENST00000595229.1	4	+	156226123	156272319	46196	5	ENSG00000250910.2	Antisense	ENSEMBL
p12945	0.359525	1.16711e-05	0.693792	169.319	162.812	10.8533	119.409	18.5007	100.05	ENST00000593486.1	4	+	156226149	156267521	41372	5	ENSG00000250910.2	Antisense	ENSEMBL
p12946	1.55716e-06	4.64294e-10	0.892221	61.5708	87.0989	14.239	73.7374	13.2428	58.3704	ENST00000597939.1	4	+	156226149	156275526	49377	4	ENSG00000250910.2	Antisense	ENSEMBL
p12967	0.107063	6.39526e-08	0.654504	88.6541	5.05372	52.2493	11.6516	22.0228	61.8551	ENST00000503611.1	4	+	159091903	159124029	32126	6	ENSG00000248429.1	Antisense	ENSEMBL
p12974	1.57073e-05	0.237114	0.994245	64.9212	11.4496	40.8859	11.2641	48.9733	56.3446	ENST00000512831.1	4	+	163661819	163663200	1381	2	ENSG00000248431.1	Intergenic	ENSEMBL
p12981	0.000950104	3.44974e-06	0.395125	108.98	183.833	138.712	56.9242	21.3177	92.2645	ENST00000507838.1	4	+	166605790	166683930	78140	6	ENSG00000249500.1	Intergenic	ENSEMBL
p12987	0.00259895	0.015667	0.627749	75.7393	26.4315	88.2399	46.3591	23.658	49.5129	ENST00000509548.2	4	+	171264239	171293462	29223	3	ENSG00000251061.2	Intergenic	ENSEMBL
p12991	0.532015	0.000803198	1	4.39025	4.39025	4.39025	4.39025	4.39025	4.39025	ENST00000503198.1	4	+	174451609	174460625	9016	4	ENSG00000237125.4	Divergent	ENSEMBL
p12992	5.66225e-10	1.37612e-09	1	4.39025	4.39025	4.39025	4.39025	4.39025	4.39025	ENST00000505032.1	4	+	174451612	174452489	877	3	ENSG00000237125.4	Divergent	ENSEMBL
p12995	0.0608914	3.6841e-07	1.2849	62.6971	25.5309	1.05343	23.8144	63.6203	27.2828	ENST00000503309.1	4	+	174451625	174455228	3603	3	ENSG00000237125.4	Divergent	ENSEMBL
p12997	6.69246e-08	1.23108e-06	1	4.39025	4.39025	4.39025	4.39025	4.39025	4.39025	ENST00000504740.1	4	+	174451629	174504247	52618	4	ENSG00000237125.4	Divergent	ENSEMBL
p13004	8.81538e-05	8.17082e-07	1.59482	60.4575	4.23258	27.0486	85.7107	22.0882	38.5076	ENST00000509194.1	4	+	177590771	177627299	36528	2	ENSG00000248388.1	Antisense	ENSEMBL
p13011	1.90688e-10	5.76803e-06	1	4.39025	4.39025	4.39025	4.39025	4.39025	4.39025	ENST00000509017.1	4	+	185973049	186028402	55353	9	ENSG00000250754.1	Intergenic	ENSEMBL
p13017	9.93091e-12	8.37733e-11	1.75878	203.024	82.5307	265.851	286.864	289.523	393.414	ENST00000507644.1	4	+	187812430	187813520	1090	2	ENSG00000250829.1	Intergenic	ENSEMBL
p13024	0.000604582	1.72695e-06	1.91988	138.604	90.1276	14.3145	166.852	161.091	138.678	ENST00000509212.1	4	+	188571620	188581521	9901	2	ENSG00000249642.1	Intergenic	ENSEMBL
p13030	1.03269e-10	3.6303e-05	1	4.39025	4.39025	4.39025	4.39025	4.39025	4.39025	ENST00000503458.1	4	+	189376778	189523060	146282	4	ENSG00000249378.1	Intergenic	ENSEMBL
p22255	3.98105e-06	2.21538e-06	1.21227	1122.84	413.374	306.568	755.892	825.184	652.875	TCONS_00009003	4	-	1282935	1283492	557	2	XLOC_003849	Divergent	HumanLincRNACatalog
p22257	0.276808	9.75063e-06	0.973285	678.387	578.538	872.677	278.973	988.886	804.851	TCONS_00009007	4	-	1573435	1582249	8814	2	XLOC_003853	Intergenic	HumanLincRNACatalog
p22261	2.28432e-08	0.00228916	1	4.39025	4.39025	4.39025	4.39025	4.39025	4.39025	TCONS_00008410	4	-	2037933	2043486	5553	2	XLOC_003854	Divergent	HumanLincRNACatalog
p22263	1.5251e-08	0.00172841	1.57027	94.6453	85.5173	120.69	190.668	107.859	173.893	TCONS_00009012	4	-	4562119	4577700	15581	5	XLOC_003863	Intergenic	HumanLincRNACatalog
p22265	9.62744e-11	6.56414e-05	1	4.39025	4.39025	4.39025	4.39025	4.39025	4.39025	TCONS_00009018	4	-	4567820	4577798	9978	3	XLOC_003863	Intergenic	HumanLincRNACatalog
p22270	2.36274e-10	0.00767376	1.10014	2616.63	2056.84	3603.38	1159.36	3885.71	4060.64	TCONS_00009024	4	-	7099079	7105186	6107	2	XLOC_003872	Intergenic	HumanLincRNACatalog
p22277	1.98684e-08	6.24178e-05	0.825944	2665.95	3960.63	3312.61	828.228	3275.19	4105.8	TCONS_00008437	4	-	12471481	12611001	139520	3	XLOC_003883	Intergenic	HumanLincRNACatalog
p22287	1.0732e-05	0.000134246	1.09175	212.093	65.2163	216.289	23.3705	262.16	253.357	TCONS_00008450	4	-	25432809	25436119	3310	2	XLOC_003909	Intergenic	HumanLincRNACatalog
p22290	1.50607e-10	0.000927785	0.962964	204.269	277.764	273.19	237.714	212.013	277.526	TCONS_00007730	4	-	25866802	25867423	621	2	XLOC_003911	Intergenic	HumanLincRNACatalog
p22295	2.49354e-06	4.38471e-06	1.13657	95.104	5.48088	123.056	2.85584	131.315	120.013	TCONS_00008457	4	-	32441609	32561930	120321	2	XLOC_003919	Intergenic	HumanLincRNACatalog
p22298	5.46104e-10	1.02829e-06	1.46676	87.9841	58.3971	9.29428	73.0388	64.8536	90.4456	TCONS_00008465	4	-	38278023	38281503	3480	2	XLOC_003926	Intergenic	HumanLincRNACatalog
p22308	1.14856e-06	0.24782	0.864223	126.124	165.197	22.4676	109.28	11.4514	150.453	TCONS_00009065	4	-	64329175	64339851	10676	3	XLOC_003970	Intergenic	HumanLincRNACatalog
p22309	0.000301295	0.0762931	0.937369	77.6078	5.17014	33.587	52.9632	1.241	54.8727	TCONS_00008498	4	-	65792315	65803551	11236	2	XLOC_003971	Intergenic	HumanLincRNACatalog
p22312	1.29345e-09	4.35393e-06	1	4.39025	4.39025	4.39025	4.39025	4.39025	4.39025	TCONS_00008503	4	-	75850937	75857875	6938	2	XLOC_003982	Divergent	HumanLincRNACatalog
p22319	0.000109062	2.06109e-05	0.888592	195.358	253.383	270.821	127.22	293.66	218.517	TCONS_00009085	4	-	90466474	90472453	5979	2	XLOC_004016	Intergenic	HumanLincRNACatalog
p22336	0.0058624	0.0931999	0.556145	164.517	152.64	199.582	23.9409	62.1482	201.292	TCONS_00008565	4	-	122484905	122486182	1277	2	XLOC_004059	Intergenic	HumanLincRNACatalog
p22339	0.0820197	1.15565e-05	1	4.39025	4.39025	4.39025	4.39025	4.39025	4.39025	TCONS_00007820	4	-	125263313	125299036	35723	3	XLOC_004063	Intergenic	HumanLincRNACatalog
p22344	0.000365896	6.11233e-05	1	4.39025	4.39025	4.39025	4.39025	4.39025	4.39025	TCONS_00008580	4	-	137499810	137503256	3446	2	XLOC_004089	Intergenic	HumanLincRNACatalog
p22357	0.00357737	4.42496e-05	1.02602	83.6902	57.2972	41.6174	68.7937	73.3214	45.2412	TCONS_00008606	4	-	146502619	146509110	6491	2	XLOC_004112	Intergenic	HumanLincRNACatalog
p22368	0.00107869	0.000245356	1.44258	73.9464	73.0788	18.0794	98.164	86.2316	53.7806	TCONS_00009151	4	-	157545913	157563439	17526	3	XLOC_004135	Intergenic	HumanLincRNACatalog
p22369	4.05871e-10	4.9555e-06	1	4.39025	4.39025	4.39025	4.39025	4.39025	4.39025	TCONS_00009152	4	-	157555694	157563834	8140	2	XLOC_004135	Intergenic	HumanLincRNACatalog
p22372	3.21464e-05	3.65595e-06	1	4.39025	4.39025	4.39025	4.39025	4.39025	4.39025	TCONS_00008636	4	-	162021046	162046045	24999	3	XLOC_004141	Intergenic	HumanLincRNACatalog
p22381	0.00233385	0.380814	1	4.39025	4.39025	4.39025	4.39025	4.39025	4.39025	TCONS_00008650	4	-	174374163	174442111	67948	3	XLOC_004166	Intergenic	HumanLincRNACatalog
p22383	9.63008e-11	1.27524e-05	1.75056	341.667	134.467	62.4538	80.9523	14.8871	846.989	TCONS_00008664	4	-	176366444	176372576	6132	2	XLOC_004177	Intergenic	HumanLincRNACatalog
p22384	4.23273e-07	4.73996e-10	1	4.39025	4.39025	4.39025	4.39025	4.39025	4.39025	TCONS_00008665	4	-	177567676	177592811	25135	2	XLOC_004180	Intergenic	HumanLincRNACatalog
p22396	0.488472	0.343839	0.815471	104.997	140.011	51.7277	21.3965	181.058	39.5254	TCONS_00009185	4	-	184270285	184271991	1706	2	XLOC_004198	Intergenic	HumanLincRNACatalog
p22400	0.00208715	0.226831	1.08636	1086.58	945.869	139.19	520.973	488.216	1349.98	TCONS_00009186	4	-	185192862	185198481	5619	3	XLOC_004202	Intergenic	HumanLincRNACatalog
p22402	1.67555e-06	0.000220131	2.11767	321.379	316.325	124.564	159.014	412.753	1042.46	TCONS_00008689	4	-	185286351	185303530	17179	6	XLOC_004205	Intergenic	HumanLincRNACatalog
p22403	6.23313e-07	4.18314e-11	1	4.39025	4.39025	4.39025	4.39025	4.39025	4.39025	TCONS_00009189	4	-	185289387	185303530	14143	5	XLOC_004205	Intergenic	HumanLincRNACatalog
p22404	0.000262785	1.74803e-07	1.31773	309.068	389.067	449.794	293.865	375.627	843.163	TCONS_00009190	4	-	185289387	185303530	14143	6	XLOC_004205	Intergenic	HumanLincRNACatalog
p22406	7.6307e-05	1.7583e-08	1	4.39025	4.39025	4.39025	4.39025	4.39025	4.39025	TCONS_00008691	4	-	185290346	185303524	13178	5	XLOC_004205	Intergenic	HumanLincRNACatalog
p22407	0.0184466	0.00135693	1	4.39025	4.39025	4.39025	4.39025	4.39025	4.39025	TCONS_00008692	4	-	185299886	185303530	3644	2	XLOC_004205	Intergenic	HumanLincRNACatalog
p22408	0.00704659	0.301631	0.910345	1397.67	1165.42	396.362	326.327	934.909	1432.89	TCONS_00008693	4	-	185395885	185397029	1144	2	XLOC_004206	Divergent	HumanLincRNACatalog
p22409	0.0126465	5.65365e-06	1	4.39025	4.39025	4.39025	4.39025	4.39025	4.39025	TCONS_00009191	4	-	185396286	185407002	10716	2	XLOC_004206	Divergent	HumanLincRNACatalog
p22419	7.3126e-06	6.77845e-07	1	4.39025	4.39025	4.39025	4.39025	4.39025	4.39025	TCONS_00008716	4	-	190200224	190201335	1111	2	XLOC_004229	Intergenic	HumanLincRNACatalog
p22425	5.25426e-10	1.57547e-05	1.68808	61.0447	1.57148	44.714	71.7948	68.3408	41.0465	TCONS_00007952	4	+	1031540	1045258	13718	2	XLOC_003417	Intergenic	HumanLincRNACatalog
p22427	1.76349e-07	0.00017732	1	4.39025	4.39025	4.39025	4.39025	4.39025	4.39025	TCONS_00007955	4	+	1548568	1555291	6723	2	XLOC_003422	Intergenic	HumanLincRNACatalog
p22436	0.0327048	0.670791	1	4.39025	4.39025	4.39025	4.39025	4.39025	4.39025	TCONS_00007381	4	+	4763531	4789101	25570	3	XLOC_003433	Intergenic	HumanLincRNACatalog
p22444	9.05648e-08	8.95093e-08	0.996764	1102.23	525.682	389.301	149.849	41.9125	1818.92	TCONS_00007979	4	+	10069733	10073254	3521	2	XLOC_003449	Intergenic	HumanLincRNACatalog
p22448	0.00221396	1.16045e-08	0.490253	97.9204	28.4428	192.133	43.6602	40.4947	71.9888	TCONS_00007988	4	+	11315541	11352918	37377	5	XLOC_003455	Intergenic	HumanLincRNACatalog
[truncated: 6,449 more rows]
