# Supplementary material for: Long Noncoding RNA FAM201A Mediates the Radiosensitivity of Esophageal Squamous Cell Cancer by Regulating ATM and mTOR Expression via miR-101
Source: Front Genet. 2018 Dec 5;9:611. doi: 10.3389/fgene.2018.00611 (PMC6292217; doi:10.3389/fgene.2018.00611)
Supplement: File S1 — Results of lncRNA chip microarray. [file Data_Sheet_1.ZIP › Supplementary File/Supplementary file 2--Results of PCR of candidate lncRNAs/Raw data of candidated lncRNA.xlsx]

## Sheet: Sheet1
CASC2
	ΔCт	ΔΔCт	value	average	SE	P value
781148	5.10836	0	1	1.67916	0.370806
883857	6.01911	0.910758	0.531906
884517	4.88515	-0.22321	1.16733							CASC2
898656	5.97854	0.870184	0.547077							911259	倪政华	不敏感
911259	3.11741	-1.99095	3.97498							923727	李华传
SD-1	4.47364	-0.634718	1.55263							896357	李惠光
SD-2	4.66338	-0.444975	1.36129
SD-3	5.03338	-0.0749786	1.05335							872963	陈德源	敏感
SD-4	4.2009	-0.907451	1.87573
SD-5	5.11433	0.00597197	0.995869
SD-6	2.61229	-2.49607	5.64145							DLX6-AS1
SD-7	3.59761	-1.51075	2.84958							887183	陈性建	不敏感
SD-8	4.82916	-0.279191	1.21351
SD-9	5.19073	0.082379	0.944499							924611	施时官	敏感
PD-1	6.1726	1.06425	0.478223							861900	吴孝善
924611	6.80658	1.69822	0.308166	0.66877	0.120794	0.00665034				928062	徐文牵
910717	7.93635	2.828	0.140828							912756	郑元森
908382	7.77378	2.66542	0.157626
911696	8.62829	3.51994	0.0871753
914636	5.94047	0.832111	0.561707
PR-1	3.79014	-1.31821	2.49357							FAM201A
PR-2	5.70355	0.595196	0.661954							919311	陈志建	不敏感
PR-3	4.82486	-0.283497	1.21714							923727	李华传
PR-4	5.83761	0.729253	0.603216							918866	唐锦椿
PR-5	5.72087	0.612515	0.654056
PR-6	6.00266	0.894303	0.538007							861900	吴孝善	敏感
PR-7	6.96543	1.85708	0.276035
PR-8	5.91805	0.809695	0.570503
PR-9	4.90379	-0.204567	1.15234
PR-10	6.10903	1.00067	0.499768
PR-11	5.49249	0.384139	0.766236
PR-12	6.84159	1.73323	0.300777
PR-13	5.79823	0.689872	0.619909
PR-14	5.94119	0.83283	0.561427
CR-1	4.83937	-0.268986	1.20496
DLX6-AS1
	ΔCт	ΔΔCт	value	average	SE	P value
781148	7.06395	0	1	2.47176	1.02207
883857	6.60177	-0.462179	1.37762
884517	7.02046	-0.043482	1.0306
898656	9.36733	2.30338	0.202587
911259	7.89847	0.834524	0.560768
SD-1	6.12592	-0.938027	1.91591
SD-2	7.98572	0.92177	0.527861
SD-3	7.98033	0.916386	0.529835
SD-4	8.80888	1.74493	0.298348
SD-5	7.18522	0.121275	0.919375
SD-6	4.77556	-2.28838	4.88509
SD-7	5.07257	-1.99138	3.97617
SD-8	6.65387	-0.410072	1.32875
SD-9	5.68087	-1.38308	2.60824
PD-1	3.07161	-3.99234	15.9153
924611	3.56687	-3.49707	11.2908	8.08287	2.18409	0.0440733
910717	5.80558	-1.25836	2.39224
908382	6.78791	-0.276035	1.21086
911696	5.55237	-1.51158	2.85122
914636	4.20322	-2.86072	7.26378
PR-1	6.35113	-0.712817	1.639
PR-2	4.11907	-2.94488	7.7001
PR-3	3.6148	-3.44915	10.9219
PR-4	5.88443	-1.17952	2.26501
PR-5	3.85643	-3.20752	9.23761
PR-6	5.96124	-1.1027	2.14757
PR-7	5.03492	-2.02903	4.08129
PR-8	7.22067	0.156724	0.89706
PR-9	2.29054	-4.7734	27.3488
PR-10	1.78269	-5.28125	38.888
PR-11	5.39143	-1.67251	3.18769
PR-12	3.00024	-4.0637	16.7223
PR-13	8.13969	1.07575	0.474425
PR-14	5.68908	-1.37487	2.59344
CR-1	3.96899	-3.09496	8.54427
FAM201A
	ΔCт	ΔΔCт	value	average	SE	P value
781148	6.12485	0	1	0.987584	0.183562
883857	5.84348	-0.281376	1.21535
884517	7.79106	1.66621	0.31508
898656	6.9019	0.777051	0.583558
911259	6.04808	-0.0767774	1.05466
SD-1	6.49223	0.367381	0.775189
SD-2	7.29075	1.1659	0.445686
SD-3	8.00613	1.88127	0.271444
SD-4	6.84383	0.718973	0.60753
SD-5	5.15043	-0.974421	1.96485
SD-6	4.794	-1.33085	2.51551
SD-7	6.04104	-0.083808	1.05981
SD-8	7.09503	0.970174	0.510445
SD-9	4.99864	-1.12622	2.18286
PD-1	7.80623	1.68138	0.311785
924611	8.92365	2.7988	0.143707	0.436797	0.106795	0.00977818
910717	7.0967	0.971851	0.509852
908382	9.06812	2.94326	0.130014
911696	7.02319	0.898339	0.536504
914636	8.99	2.86515	0.137247
PR-1	7.03855	0.913699	0.530822
PR-2	8.93915	2.8143	0.142171
PR-3	9.82761	3.70276	0.0767994
PR-4	6.90287	0.778019	0.583167
PR-5	10.0328	3.908	0.0666156
PR-6	9.31624	3.19139	0.10947
PR-7	7.67662	1.55176	0.341093
PR-8	7.22067	1.09582	0.467871
PR-9	5.08062	-1.04424	2.06227
PR-10	8.86998	2.74513	0.149153
PR-11	7.29365	1.1688	0.444792
PR-12	6.28545	0.160597	0.894655
PR-13	8.74708	2.62222	0.162417
PR-14	8.96355	2.8387	0.139787
CR-1	5.97751	-0.147342	1.10753
DLEU2
	ΔCт	ΔΔCт	value	average	SE	P value
781148	8.38397	0	1	2.19363	0.575447
883857	6.5658	-1.81817	3.52634
884517	8.94493	0.560963	0.677849
898656	9.07587	0.691901	0.619038
911259	6.97085	-1.41311	2.66312
SD-1	7.72587	-0.658098	1.578
SD-2	7.61123	-0.772735	1.70851
SD-3	8.24575	-0.138217	1.10054
SD-4	6.92775	-1.45622	2.74388
SD-5	8.21601	-0.167956	1.12347
SD-6	6.58149	-1.80247	3.48818
SD-7	5.14705	-3.23692	9.42777
SD-8	7.80353	-0.580436	1.4953
SD-9	8.2234	-0.16056	1.11772
PD-1	9.03958	0.655612	0.634806
924611	9.63631	1.25234	0.419766	2.78146	0.616087	0.503641
910717	8.08238	-0.301582	1.23249
908382	8.5161	0.132132	0.912482
911696	7.64758	-0.736382	1.66599
914636	7.12075	-1.26322	2.40031
PR-1	8.43621	0.0522434	0.964435
PR-2	5.75656	-2.6274	6.17913
PR-3	7.62501	-0.758951	1.69226
PR-4	6.95041	-1.43356	2.70112
PR-5	6.9931	-1.39086	2.62235
PR-6	8.93431	0.550344	0.682857
PR-7	7.61907	-0.764898	1.69925
PR-8	9.86029	1.47633	0.359402
PR-9	5.16646	-3.2175	9.30176
PR-10	6.17887	-2.20509	4.61104
PR-11	5.2606	-3.12337	8.7142
PR-12	7.9573	-0.426664	1.34412
PR-13	9.77309	1.38912	0.381797
PR-14	5.70977	-2.67419	6.38282
CR-1	7.93855	-0.445419	1.36171
MCF2L-AS1
	ΔCт	ΔΔCт	value	average	SE	P value
781148	8.22003	0	1	1.36705	0.312545
883857	7.87092	-0.349118	1.27378
884517	9.85727	1.63723	0.321473
898656	6.95454	-1.26549	2.40409
911259	5.92642	-2.29362	4.90283
SD-1	8.69791	0.477879	0.718032
SD-2	9.99957	1.77953	0.291278
SD-3	7.12277	-1.09726	2.13948
SD-4	10.0227	1.80266	0.286645
SD-5	8.34303	0.122996	0.918278
SD-6	7.4539	-0.766137	1.70071
SD-7	8.2515	0.0314691	0.978423
SD-8	7.10798	-1.11206	2.16153
SD-9	10.1307	1.91068	0.265967
PD-1	8.02684	-0.193194	1.14329
924611	8.74582	0.525783	0.694582	2.19378	0.475269	0.186749
910717	8.78619	0.566155	0.675415
908382	4.8942	-3.32584	10.0271
911696	6.80447	-1.41557	2.66764
914636	7.15237	-1.06766	2.09603
PR-1	7.32477	-0.895264	1.85995
PR-2	8.63361	0.413571	0.750763
PR-3	6.89532	-1.32472	2.50484
PR-4	8.10089	-0.119147	1.08609
PR-5	7.12291	-1.09713	2.13928
PR-6	6.21707	-2.00297	4.00824
PR-7	8.60834	0.388306	0.764026
PR-8	7.22067	-0.999365	1.99912
PR-9	6.8933	-1.32674	2.50835
PR-10	9.06838	0.848345	0.555421
PR-11	6.26763	-1.95241	3.8702
PR-12	9.23452	1.01448	0.495007
PR-13	7.91512	-0.304913	1.23534
PR-14	6.74859	-1.47145	2.773
CR-1	7.99938	-0.220658	1.16527

## Sheet: Sheet2
CASC2
	ΔCт	ΔΔCт	value	average	SE	P value
781148	5.10836	0	1	1.67916	0.370806
883857	6.01911	0.910758	0.531906
884517	4.88515	-0.22321	1.16733
898656	5.97854	0.870184	0.547077
911259	3.11741	-1.99095	3.97498
SD-1	4.47364	-0.634718	1.55263
SD-2	4.66338	-0.444975	1.36129
SD-3	5.03338	-0.0749786	1.05335
SD-4	4.2009	-0.907451	1.87573
SD-5	5.11433	0.00597197	0.995869
SD-6	2.61229	-2.49607	5.64145
SD-7	3.59761	-1.51075	2.84958
SD-8	4.82916	-0.279191	1.21351
SD-9	5.19073	0.082379	0.944499
PD-1	6.1726	1.06425	0.478223
924611	6.80658	1.69822	0.308166	0.66877	0.120794	0.00665034
910717	7.93635	2.828	0.140828
908382	7.77378	2.66542	0.157626
911696	8.62829	3.51994	0.0871753
914636	5.94047	0.832111	0.561707
PR-1	3.79014	-1.31821	2.49357
PR-2	5.70355	0.595196	0.661954
PR-3	4.82486	-0.283497	1.21714
PR-4	5.83761	0.729253	0.603216
PR-5	5.72087	0.612515	0.654056
PR-6	6.00266	0.894303	0.538007
PR-7	6.96543	1.85708	0.276035
PR-8	5.91805	0.809695	0.570503
PR-9	4.90379	-0.204567	1.15234
PR-10	6.10903	1.00067	0.499768
PR-11	5.49249	0.384139	0.766236
PR-12	6.84159	1.73323	0.300777
PR-13	5.79823	0.689872	0.619909
PR-14	5.94119	0.83283	0.561427
CR-1	4.83937	-0.268986	1.20496
DLX6-AS1
	ΔCт	ΔΔCт	value	average	SE	P value
781148	7.06395	0	1	2.47176	1.02207
883857	6.60177	-0.462179	1.37762
884517	7.02046	-0.043482	1.0306
898656	9.36733	2.30338	0.202587
911259	7.89847	0.834524	0.560768
SD-1	6.12592	-0.938027	1.91591
SD-2	7.98572	0.92177	0.527861
SD-3	7.98033	0.916386	0.529835
SD-4	8.80888	1.74493	0.298348
SD-5	7.18522	0.121275	0.919375
SD-6	4.77556	-2.28838	4.88509
SD-7	5.07257	-1.99138	3.97617
SD-8	6.65387	-0.410072	1.32875
SD-9	5.68087	-1.38308	2.60824
PD-1	3.07161	-3.99234	15.9153
924611	3.56687	-3.49707	11.2908	8.08287	2.18409	0.0440733
910717	5.80558	-1.25836	2.39224
908382	6.78791	-0.276035	1.21086
911696	5.55237	-1.51158	2.85122
914636	4.20322	-2.86072	7.26378
PR-1	6.35113	-0.712817	1.639
PR-2	4.11907	-2.94488	7.7001
PR-3	3.6148	-3.44915	10.9219
PR-4	5.88443	-1.17952	2.26501
PR-5	3.85643	-3.20752	9.23761
PR-6	5.96124	-1.1027	2.14757
PR-7	5.03492	-2.02903	4.08129
PR-8	7.22067	0.156724	0.89706
PR-9	2.29054	-4.7734	27.3488
PR-10	1.78269	-5.28125	38.888
PR-11	5.39143	-1.67251	3.18769
PR-12	3.00024	-4.0637	16.7223
PR-13	8.13969	1.07575	0.474425
PR-14	5.68908	-1.37487	2.59344
CR-1	3.96899	-3.09496	8.54427
FAM201A
	ΔCт	ΔΔCт	value	average	SE	P value
781148	6.12485	0	1	0.987584	0.183562
883857	5.84348	-0.281376	1.21535
884517	7.79106	1.66621	0.31508
898656	6.9019	0.777051	0.583558
911259	6.04808	-0.0767774	1.05466
SD-1	6.49223	0.367381	0.775189
SD-2	7.29075	1.1659	0.445686
SD-3	8.00613	1.88127	0.271444
SD-4	6.84383	0.718973	0.60753
SD-5	5.15043	-0.974421	1.96485
SD-6	4.794	-1.33085	2.51551
SD-7	6.04104	-0.083808	1.05981
SD-8	7.09503	0.970174	0.510445
SD-9	4.99864	-1.12622	2.18286
PD-1	7.80623	1.68138	0.311785
924611	8.92365	2.7988	0.143707	0.436797	0.106795	0.00977818
910717	7.0967	0.971851	0.509852
908382	9.06812	2.94326	0.130014
911696	7.02319	0.898339	0.536504
914636	8.99	2.86515	0.137247
PR-1	7.03855	0.913699	0.530822
PR-2	8.93915	2.8143	0.142171
PR-3	9.82761	3.70276	0.0767994
PR-4	6.90287	0.778019	0.583167
PR-5	10.0328	3.908	0.0666156
PR-6	9.31624	3.19139	0.10947
PR-7	7.67662	1.55176	0.341093
PR-8	7.22067	1.09582	0.467871
PR-9	5.08062	-1.04424	2.06227
PR-10	8.86998	2.74513	0.149153
PR-11	7.29365	1.1688	0.444792
PR-12	6.28545	0.160597	0.894655
PR-13	8.74708	2.62222	0.162417
PR-14	8.96355	2.8387	0.139787
CR-1	5.97751	-0.147342	1.10753
