# Supplementary material for: Long Noncoding RNA FAM201A Mediates the Radiosensitivity of Esophageal Squamous Cell Cancer by Regulating ATM and mTOR Expression via miR-101
Source: Front Genet. 2018 Dec 5;9:611. doi: 10.3389/fgene.2018.00611 (PMC6292217; doi:10.3389/fgene.2018.00611)
Supplement: File S1 — Results of lncRNA chip microarray. [file Data_Sheet_1.ZIP › Supplementary File/Supplementary file 3--FAM201A as a novel lncRNA with potential function in Radiosensitivity/Supplementary file --Youden index.xlsx]

## Sheet: FAM201A-Youden value
FAM201A							CASC2
	Positive if Greater Than or Equal Toa	Sensitivity	1 - Specificity	Specificity	Youden index	maximum of Youden index		Positive if Greater Than or Equal Toa	Sensitivity	1 - Specificity	Specificity	Youden index	maximum of Youden index
	3.794	1	1	0	0	0.517		1.61229	1	1	0	0	0.6
	4.89632	1	0.933	0.067	0.067			2.86485	1	0.933	0.067	0.067
	5.03963	1	0.867	0.133	0.133			3.35751	1	0.867	0.133	0.133
	5.11552	0.95	0.867	0.133	0.083			3.69388	1	0.8	0.2	0.2
	5.49695	0.95	0.8	0.2	0.15			3.99553	0.95	0.8	0.2	0.15
	5.91049	0.95	0.733	0.267	0.217			4.33727	0.95	0.733	0.267	0.217
	6.00928	0.9	0.733	0.267	0.167			4.56851	0.95	0.667	0.333	0.283
	6.04456	0.9	0.667	0.333	0.233			4.74412	0.95	0.6	0.4	0.35
	6.08646	0.9	0.6	0.4	0.3			4.82701	0.9	0.6	0.4	0.3
	6.20515	0.9	0.533	0.467	0.367			4.83427	0.9	0.533	0.467	0.367
	6.38884	0.85	0.533	0.467	0.317			4.86226	0.85	0.533	0.467	0.317
	6.66803	0.85	0.467	0.533	0.383			4.89447	0.85	0.467	0.533	0.383
	6.87287	0.85	0.4	0.6	0.45			4.96858	0.8	0.467	0.533	0.333
	6.90239	0.85	0.333	0.667	0.517			5.07087	0.8	0.4	0.6	0.4
	6.96303	0.8	0.333	0.667	0.467			5.11134	0.8	0.333	0.667	0.467
	7.03087	0.75	0.333	0.667	0.417			5.15253	0.8	0.267	0.733	0.533
	7.06679	0.7	0.333	0.667	0.367			5.34162	0.8	0.2	0.8	0.6
	7.09586	0.7	0.267	0.733	0.433			5.59802	0.75	0.2	0.8	0.55
	7.15869	0.65	0.267	0.733	0.383			5.71221	0.7	0.2	0.8	0.5
	7.25571	0.6	0.267	0.733	0.333			5.75955	0.65	0.2	0.8	0.45
	7.2922	0.6	0.2	0.8	0.4			5.81792	0.6	0.2	0.8	0.4
	7.48513	0.55	0.2	0.8	0.35			5.87783	0.55	0.2	0.8	0.35
	7.73384	0.5	0.2	0.8	0.3			5.92926	0.5	0.2	0.8	0.3
	7.79864	0.5	0.133	0.867	0.367			5.94083	0.45	0.2	0.8	0.25
	7.90618	0.5	0.067	0.933	0.433			5.95986	0.4	0.2	0.8	0.2
	8.3766	0.5	0	1	0.5			5.9906	0.4	0.133	0.867	0.267
	8.80853	0.45	0	1	0.45			6.01089	0.35	0.133	0.867	0.217
	8.89682	0.4	0	1	0.4			6.06407	0.35	0.067	0.933	0.283
	8.9314	0.35	0	1	0.35			6.14081	0.3	0.067	0.933	0.233
	8.95135	0.3	0	1	0.3			6.48959	0.3	0	1	0.3
	8.97678	0.25	0	1	0.25			6.82408	0.25	0	1	0.25
	9.02906	0.2	0	1	0.2			6.90351	0.2	0	1	0.2
	9.19218	0.15	0	1	0.15			7.36961	0.15	0	1	0.15
	9.57193	0.1	0	1	0.1			7.85506	0.1	0	1	0.1
	9.93023	0.05	0	1	0.05			8.28232	0.05	0	1	0.05
	11.0328	0	0	1	0			9.62829	0	0	1	0
