# Supplementary material for: Long Noncoding RNA FAM201A Mediates the Radiosensitivity of Esophageal Squamous Cell Cancer by Regulating ATM and mTOR Expression via miR-101
Source: Front Genet. 2018 Dec 5;9:611. doi: 10.3389/fgene.2018.00611 (PMC6292217; doi:10.3389/fgene.2018.00611)
Supplement: File S1 — Results of lncRNA chip microarray. [file Data_Sheet_1.ZIP › Supplementary File/Supplementary file 3--FAM201A as a novel lncRNA with potential function in Radiosensitivity/Supplementaty file--clinical characters and lncRNAs.xlsx]

## Sheet: 原始数据不能修改
CASC2
	ΔCт	ΔΔCт	value	average	SE	P value
781148	5.10836	0	1	1.67916	0.370806
883857	6.01911	0.910758	0.531906
884517	4.88515	-0.22321	1.16733							CASC2
898656	5.97854	0.870184	0.547077							911259	倪政华	不敏感
911259	3.11741	-1.99095	3.97498							923727	李华传
SD-1	4.47364	-0.634718	1.55263							896357	李惠光
SD-2	4.66338	-0.444975	1.36129
SD-3	5.03338	-0.0749786	1.05335							872963	陈德源	敏感
SD-4	4.2009	-0.907451	1.87573
SD-5	5.11433	0.00597197	0.995869
SD-6	2.61229	-2.49607	5.64145							DLX6-AS1
SD-7	3.59761	-1.51075	2.84958							887183	陈性建	不敏感
SD-8	4.82916	-0.279191	1.21351
SD-9	5.19073	0.082379	0.944499							924611	施时官	敏感
PD-1	6.1726	1.06425	0.478223							861900	吴孝善
924611	6.80658	1.69822	0.308166	0.66877	0.120794	0.00665034				928062	徐文牵
910717	7.93635	2.828	0.140828							912756	郑元森
908382	7.77378	2.66542	0.157626
911696	8.62829	3.51994	0.0871753
914636	5.94047	0.832111	0.561707
PR-1	3.79014	-1.31821	2.49357							FAM201A
PR-2	5.70355	0.595196	0.661954							919311	陈志建	不敏感
PR-3	4.82486	-0.283497	1.21714							923727	李华传
PR-4	5.83761	0.729253	0.603216							918866	唐锦椿
PR-5	5.72087	0.612515	0.654056
PR-6	6.00266	0.894303	0.538007							861900	吴孝善	敏感
PR-7	6.96543	1.85708	0.276035
PR-8	5.91805	0.809695	0.570503
PR-9	4.90379	-0.204567	1.15234
PR-10	6.10903	1.00067	0.499768
PR-11	5.49249	0.384139	0.766236
PR-12	6.84159	1.73323	0.300777
PR-13	5.79823	0.689872	0.619909
PR-14	5.94119	0.83283	0.561427
CR-1	4.83937	-0.268986	1.20496
DLX6-AS1
	ΔCт	ΔΔCт	value	average	SE	P value
781148	7.06395	0	1	2.47176	1.02207
883857	6.60177	-0.462179	1.37762
884517	7.02046	-0.043482	1.0306
898656	9.36733	2.30338	0.202587
911259	7.89847	0.834524	0.560768
SD-1	6.12592	-0.938027	1.91591
SD-2	7.98572	0.92177	0.527861
SD-3	7.98033	0.916386	0.529835
SD-4	8.80888	1.74493	0.298348
SD-5	7.18522	0.121275	0.919375
SD-6	4.77556	-2.28838	4.88509
SD-7	5.07257	-1.99138	3.97617
SD-8	6.65387	-0.410072	1.32875
SD-9	5.68087	-1.38308	2.60824
PD-1	3.07161	-3.99234	15.9153
924611	3.56687	-3.49707	11.2908	8.08287	2.18409	0.0440733
910717	5.80558	-1.25836	2.39224
908382	6.78791	-0.276035	1.21086
911696	5.55237	-1.51158	2.85122
914636	4.20322	-2.86072	7.26378
PR-1	6.35113	-0.712817	1.639
PR-2	4.11907	-2.94488	7.7001
PR-3	3.6148	-3.44915	10.9219
PR-4	5.88443	-1.17952	2.26501
PR-5	3.85643	-3.20752	9.23761
PR-6	5.96124	-1.1027	2.14757
PR-7	5.03492	-2.02903	4.08129
PR-8	7.22067	0.156724	0.89706
PR-9	2.29054	-4.7734	27.3488
PR-10	1.78269	-5.28125	38.888
PR-11	5.39143	-1.67251	3.18769
PR-12	3.00024	-4.0637	16.7223
PR-13	8.13969	1.07575	0.474425
PR-14	5.68908	-1.37487	2.59344
CR-1	3.96899	-3.09496	8.54427
FAM201A
	ΔCт	ΔΔCт	value	average	SE	P value
781148	6.12485	0	1	0.987584	0.183562		781148	潘爱娇	PD-2
883857	5.84348	-0.281376	1.21535				883857	李德调	PD-3
884517	7.79106	1.66621	0.31508				884517	柯燕玲	PD-4
898656	6.9019	0.777051	0.583558				898656	林其同	PD-5
911259	6.04808	-0.0767774	1.05466				911259	倪政华	PD-6
SD-1	6.49223	0.367381	0.775189				874111	蔡敦满	SD-1
SD-2	7.29075	1.1659	0.445686				931034	陈财康	SD-2
SD-3	8.00613	1.88127	0.271444				833976	陈聪儿	SD-3
SD-4	6.84383	0.718973	0.60753				920396	陈印度	SD-4
SD-5	5.15043	-0.974421	1.96485				919311	陈志建	SD-5
SD-6	4.794	-1.33085	2.51551				923727	李华传	SD-6
SD-7	6.04104	-0.083808	1.05981				896357	李惠光	SD-7
SD-8	7.09503	0.970174	0.510445				910499	廖国昌	SD-8
SD-9	4.99864	-1.12622	2.18286				918866	唐锦椿	SD-9
PD-1	7.80623	1.68138	0.311785				914542	庄美蓉	PD-1
924611	8.92365	2.7988	0.143707	0.436797	0.106795	0.00977818	924611	施时官	PR-15
910717	7.0967	0.971851	0.509852				910717	陈秋奎	PR-16
908382	9.06812	2.94326	0.130014				908382	倪朝茂	PR-17
911696	7.02319	0.898339	0.536504				911696	陈秀快	PR-18
914636	8.99	2.86515	0.137247				914636	郑仙宝	PR-19
PR-1	7.03855	0.913699	0.530822				872963	陈德源	PR-1
PR-2	8.93915	2.8143	0.142171				879976	陈梅琼	PR-2
PR-3	9.82761	3.70276	0.0767994				922713	胡义春	PR-3
PR-4	6.90287	0.778019	0.583167				914314	江宗芳	PR-4
PR-5	10.0328	3.908	0.0666156				876935	林世铿	PR-5
PR-6	9.31624	3.19139	0.10947				905313	王鸿明	PR-6
PR-7	7.67662	1.55176	0.341093				890718	温玉哥	PR-7
PR-8	7.22067	1.09582	0.467871				916390	吴庆辉	PR-8
PR-9	5.08062	-1.04424	2.06227				861900	吴孝善	PR-9
PR-10	8.86998	2.74513	0.149153				928062	徐文牵	PR-10
PR-11	7.29365	1.1688	0.444792				880762	张平	PR-11
PR-12	6.28545	0.160597	0.894655				912756	郑元森	PR-12
PR-13	8.74708	2.62222	0.162417				914542	庄美蓉	PR-13
PR-14	8.96355	2.8387	0.139787				917763	龚永亭	PR-14
CR-1	5.97751	-0.147342	1.10753				890974	吴宝护	CR-1
DLEU2
	ΔCт	ΔΔCт	value	average	SE	P value
781148	8.38397	0	1	2.19363	0.575447
883857	6.5658	-1.81817	3.52634
884517	8.94493	0.560963	0.677849
898656	9.07587	0.691901	0.619038
911259	6.97085	-1.41311	2.66312
SD-1	7.72587	-0.658098	1.578
SD-2	7.61123	-0.772735	1.70851
SD-3	8.24575	-0.138217	1.10054
SD-4	6.92775	-1.45622	2.74388
SD-5	8.21601	-0.167956	1.12347
SD-6	6.58149	-1.80247	3.48818
SD-7	5.14705	-3.23692	9.42777
SD-8	7.80353	-0.580436	1.4953
SD-9	8.2234	-0.16056	1.11772
PD-1	9.03958	0.655612	0.634806
924611	9.63631	1.25234	0.419766	2.78146	0.616087	0.503641
910717	8.08238	-0.301582	1.23249
908382	8.5161	0.132132	0.912482
911696	7.64758	-0.736382	1.66599
914636	7.12075	-1.26322	2.40031
PR-1	8.43621	0.0522434	0.964435
PR-2	5.75656	-2.6274	6.17913
PR-3	7.62501	-0.758951	1.69226
PR-4	6.95041	-1.43356	2.70112
PR-5	6.9931	-1.39086	2.62235
PR-6	8.93431	0.550344	0.682857
PR-7	7.61907	-0.764898	1.69925
PR-8	9.86029	1.47633	0.359402
PR-9	5.16646	-3.2175	9.30176
PR-10	6.17887	-2.20509	4.61104
PR-11	5.2606	-3.12337	8.7142
PR-12	7.9573	-0.426664	1.34412
PR-13	9.77309	1.38912	0.381797
PR-14	5.70977	-2.67419	6.38282
CR-1	7.93855	-0.445419	1.36171
MCF2L-AS1
	ΔCт	ΔΔCт	value	average	SE	P value
781148	8.22003	0	1	1.36705	0.312545
883857	7.87092	-0.349118	1.27378
884517	9.85727	1.63723	0.321473
898656	6.95454	-1.26549	2.40409
911259	5.92642	-2.29362	4.90283
SD-1	8.69791	0.477879	0.718032
SD-2	9.99957	1.77953	0.291278
SD-3	7.12277	-1.09726	2.13948
SD-4	10.0227	1.80266	0.286645
SD-5	8.34303	0.122996	0.918278
SD-6	7.4539	-0.766137	1.70071
SD-7	8.2515	0.0314691	0.978423
SD-8	7.10798	-1.11206	2.16153
SD-9	10.1307	1.91068	0.265967
PD-1	8.02684	-0.193194	1.14329
924611	8.74582	0.525783	0.694582	2.19378	0.475269	0.186749
910717	8.78619	0.566155	0.675415
908382	4.8942	-3.32584	10.0271
911696	6.80447	-1.41557	2.66764
914636	7.15237	-1.06766	2.09603
PR-1	7.32477	-0.895264	1.85995
PR-2	8.63361	0.413571	0.750763
PR-3	6.89532	-1.32472	2.50484
PR-4	8.10089	-0.119147	1.08609
PR-5	7.12291	-1.09713	2.13928
PR-6	6.21707	-2.00297	4.00824
PR-7	8.60834	0.388306	0.764026
PR-8	7.22067	-0.999365	1.99912
PR-9	6.8933	-1.32674	2.50835
PR-10	9.06838	0.848345	0.555421
PR-11	6.26763	-1.95241	3.8702
PR-12	9.23452	1.01448	0.495007
PR-13	7.91512	-0.304913	1.23534
PR-14	6.74859	-1.47145	2.773
CR-1	7.99938	-0.220658	1.16527

## Sheet: lncRAN及临床资料
ΔCт-DLX6-AS1	ΔCт-CASC2	ΔCт-FAM201A	FAM201A-expression	caseno	疗效	response	response-1	name	cT-stage	cN-stage	cM-stage	疗效	放疗敏感性分类（1 CR+PR,2 SD+PD)	性别	肿瘤位置	是否死亡	初诊日期	死亡日期	死亡原因	是否复发或转移	复发或转移日期	复发、转移部位	是否复发	复发日期	是否转移	转移日期	总生存时间	无复发转移生存时间	无复发生存时间	无转移生存时间
4.77556	2.61229	4.794	high	874111	SD	SD-1	SD	蔡敦满	3	1	0	3	2	1	3	0	2015-11-27	2017-12-30	无	0	2017-12-30	无	0	2017-12-30	0	2017-12-30	25.1	25.1	25.1	25.1
5.68087	5.19073	4.99864	high	931034	SD	SD-2	SD	陈财康	2	0	0	3	2	1	1	0	2017-01-16	2017-10-28	无	0	2017-10-28	无	0	2017-10-28	0	2017-10-28	9.4	9.4	9.4	9.4
2.29054	4.90379	5.08062	high	833976	SD	SD-3	SD	陈聪儿	4	1	0	3	2	1	1	0	2016-02-16	2017-12-30	无	0	2017-12-30	无	0	2017-12-30	0	2017-12-30	22.4667	22.4667	22.4667	22.4667
7.18522	5.11433	5.15043	high	872963	PR	PR-1	PR	陈德源	4	2	0	2	1	1	1	0	2015-11-19	2017-12-26	无	1	2017-12-26	淋巴结复发，腹膜后淋巴结转移	0	2017-12-26	1	2017-12-26	25.2333	25.2333	25.2333	25.2333
6.60177	6.01911	5.84348	high	879976	PR	PR-2	PR	陈梅琼	3	1	0	2	1	2	1	0	2016-01-13	2017-12-30	无	0	2017-12-30	无	0	2017-12-30	0	2017-12-30	23.5667	23.5667	23.5667	23.5667
3.96899	4.83937	5.97751	high	910717	PR	PR-16	PR	陈秋奎	3	3	0	2	1	1	2	1	2016/08/22	2017-12-01	转移	1	2017-12-01	转移	0	2017-12-01	1	2017-12-01	15.3	15.3	15.3	15.3
5.07257	3.59761	6.04104	high	911696	PD	PR-18	PR	陈性建	4	2	0	4	2	1	3	1	2016-03-10	2017-04-30	转移	1	2017-04-30	转移	0	2017-04-30	1	2017-04-30	13.6667	13.6667	13.6667	13.6667
7.89847	3.11741	6.04808	high	920396	PR	SD-4	SD	陈秀快	4	1	0	2	1	2	1	0	2016-08-19	2017-12-24	无	0	2017-12-24	无	0	2017-12-24	0	2017-12-24	16.1667	16.1667	16.1667	16.1667
7.06395	5.10836	6.12485	high	919311	SD	SD-5	SD	陈印度	4	2	0	3	2	1	3	0	2016-11-02	2017-12-07	无	0	2017-12-07	无	0	2017-12-07	0	2017-12-07	13.1667	13.1667	13.1667	13.1667
3.00024	6.84159	6.28545	high	917763	SD	PR-14	PR	陈志建	3	1	0	3	2	1	4	0	2016-10-25	2017-12-17	无	0	2017-12-17	无	0	2017-12-17	0	2017-12-17	13.7333	13.7333	13.7333	13.7333
6.12592	4.47364	6.49223	high	922713	PR	PR-3	PR	龚永亭	3	1	0	2	1	1	3	1	2016-10-14	2017-04-30	转移	1	2017-04-30	转移	0	2017-04-30	1	2017-04-30	6.53333	6.53333	6.53333	6.53333
8.80888	4.2009	6.84383	high	914314	PR	PR-4	PR	胡义春	4	2	0	2	1	1	3	0	2016-11-17	2017-11-01		0	2017-11-01	无	0	2017-11-01	0	2017-11-01	11.4667	11.4667	11.4667	11.4667
9.36733	5.97854	6.9019	high	884517	PR	PD-4	PD	江宗芳	2	0	0	2	1	1	4	0	2016-09-18	2016-12-01	无	0	2016-12-01	无	0	2016-12-01	0	2016-12-01	2.43333	2.43333	2.43333	2.43333
5.88443	5.83761	6.90287	low	883857	PD	PD-3	PD	柯燕玲	4	1	0	4	2	2	2	1	2016-02-22	2017-02-10	转移	1	2016-08-13	双肺、肝	0	2017-02-10	1	2016-08-13	11.6	5.7	11.6	5.7
5.55237	8.62829	7.02319	low	923727	PD	SD-6	SD	李德调	4	2	0	4	2	1	1	1	2016-02-17	2017-04-02	复发	1	2017-04-02	复发	1	2017-04-02	0	2017-04-02	13.5	13.5	13.5	13.5
6.35113	3.79014	7.03855	low	896357	SD	SD-7	SD	李华传	3	0	0	3	2	1	3	0	2016/11/24	2017-06-18	无	0	2017-06-18	无	0	2017-06-18	0	2017-06-18	6.8	6.8	6.8	6.8
6.65387	4.82916	7.09503	low	910499	SD	SD-8	SD	李惠光	3	1	0	3	2	1	2	0	2016-11-18	2017-04-12	无	0	2017-04-12	无	0	2017-04-12	0	2017-04-12	4.8	4.8	4.8	4.8
5.80558	7.93635	7.0967	low	898656	SD	PD-5	PD	廖国昌	4	1	1	3	2	1	2	0	2016-08-20	2017-01-12	无	0	2017-01-12	无	0	2017-01-12	0	2017-01-12	4.73333	4.73333	4.73333	4.73333
7.22067	5.91805	7.22067	low	876935	PD	PR-5	PR	林其同	3	2	0	4	2	1	2	0	2016-05-29	2017-11-05	无	0	2017-11-05	无	0	2017-11-05	0	2017-11-05	17.2	17.2	17.2	17.2
7.98572	4.66338	7.29075	low	908382	PR	PR-17	PR	林世铿	4	1	0	2	1	1	2	0	2015-12-19	2017-08-10	无	0	2017-08-10	无	0	2017-08-10	0	2017-08-10	19.7	19.7	19.7	19.7
5.39143	5.49249	7.29365	low	911259	PR	PD-6	PD	倪朝茂	3	1	0	2	1	1	3	1	2016-08-05	2017-11-11	复发	1	2017-11-11	复发	1	2017-11-11	0	2017-11-11	15.2	15.2	15.2	15.2
5.03492	6.96543	7.67662	low	781148	PD	PD-2	PD	倪政华	4	3	0	4	2	1	3	1	2016/8/25	2017-11-01	复发	1	2017-11-01	复发	1	2017-11-01	0	2017-11-01	14.2	14.2	14.2	14.2
7.02046	4.88515	7.79106	low	924611	PD	PR-15	PR	潘爱娇	3	0	1	4	2	2	2	1	2016-01-11	2016-11-01	复发	1	2016-06-05	野外复发	1	2016-06-05	0	2016-06-05	9.66667	4.8	4.8	4.8
3.07161	6.1726	7.80623	low	918866	PR	SD-9	SD	施时官	4	3	0	2	1	1	3	0	2016/11/30	2017-01-20	无	0	2017-01-20	无	0	2017-01-20	0	2017-01-20	1.66667	1.66667	1.66667	1.66667
7.98033	5.03338	8.00613	low	905313	SD	PR-6	PR	唐锦椿	3	2	0	3	2	1	3	0	2016/10/23	2017-01-23	无	0	2017-01-23	无	0	2017-01-23	0	2017-01-23	3	3	3	3
8.13969	5.79823	8.74708	low	890718	PR	PR-7	PR	王鸿明	3	1	0	2	1	1	3	1	2016-07-15	2017-06-10	复发	1	2017-06-10	复发	1	2017-06-10	0	2017-06-10	10.8333	10.8333	10.8333	10.8333
1.78269	6.10903	8.86998	low	890974	PR	CR-1	CR	温玉哥	4	0	0	2	1	2	1	0	2016-04-05	2017-09-12	无	0	2017-09-12	无	0	2017-09-12	0	2017-09-12	17.2333	17.2333	17.2333	17.2333
3.56687	6.80658	8.92365	low	916390	CR	PR-8	PR	吴宝护	3	1	0	1	1	2	3	0	2016-04-06	2017-09-10	无	0	2017-09-10	无	0	2017-09-10	0	2017-09-10	17.1333	17.1333	17.1333	17.1333
4.11907	5.70355	8.93915	low	861900	PR	PR-9	PR	吴庆辉	3	2	0	2	1	1	4	0	2016-10-07	2017-12-16	无	0	2017-12-16	无	0	2017-12-16	0	2017-12-16	14.3	14.3	14.3	14.3
5.68908	5.94119	8.96355	low	928062	PR	PR-10	PR	吴孝善	3	1	0	2	1	1	3	1	2015-08-26	2017-01-10	转移	1	2017-01-10	转移	0	2017-01-10	1	2017-01-10	16.4667	16.4667	16.4667	16.4667
4.20322	5.94047	8.99	low	880762	PR	PR-11	PR	徐文牵	4	2	0	2	1	1	2	1	2016/12/24	2017-02-08	转移	1	2017-02-08	双侧锁骨上淋巴结转移	0	2017-02-08	1	2017-02-08	1.46667	1.46667	1.46667	1.46667
6.78791	7.77378	9.06812	low	914636	PR	PR-19	PR	张平	4	2	0	2	1	1	3	1	2016-01-19	2017-10-10	复发	1	2017-10-10	复发	1	2017-10-10	0	2017-10-10	20.7	20.7	20.7	20.7
5.96124	6.00266	9.31624	low	912756	PR	PR-12	PR	郑仙宝	4	1	0	2	1	1	2	0	2016-09-19	2017-12-23	无	0	2017-12-23	无	0	2017-12-23	0	2017-12-23	15.1333	15.1333	15.1333	15.1333
3.6148	4.82486	9.82761	low	914542	PR	PD-1	PD	郑元森	4	1	0	2	1	1	2	0	2016-09-05	2016-12-27	无	0	2016-12-27	无	0	2016-12-27	0	2016-12-27	3.73333	3.73333	3.73333	3.73333
3.85643	5.72087	10.0328	low	914542	PR	PR-13	PR	庄美蓉	3	2	0	2	1	2	3	0	2016-09-19	2017-02-20	无	0	2017-02-20	无	0	2017-02-20	0	2017-02-20	5.03333	5.03333	5.03333	5.03333

## Sheet: FAM201A-Youden value
FAM201A
	Positive if Greater Than or Equal Toa	Sensitivity	1 - Specificity	Specificity	约登值	最大约登值
	3.794	1	1	0	0	0.517
	4.89632	1	0.933	0.067	0.067
	5.03963	1	0.867	0.133	0.133
	5.11552	0.95	0.867	0.133	0.083
	5.49695	0.95	0.8	0.2	0.15
	5.91049	0.95	0.733	0.267	0.217
	6.00928	0.9	0.733	0.267	0.167
	6.04456	0.9	0.667	0.333	0.233
	6.08646	0.9	0.6	0.4	0.3
	6.20515	0.9	0.533	0.467	0.367
	6.38884	0.85	0.533	0.467	0.317
	6.66803	0.85	0.467	0.533	0.383
	6.87287	0.85	0.4	0.6	0.45
	6.90239	0.85	0.333	0.667	0.517
	6.96303	0.8	0.333	0.667	0.467
	7.03087	0.75	0.333	0.667	0.417
	7.06679	0.7	0.333	0.667	0.367
	7.09586	0.7	0.267	0.733	0.433
	7.15869	0.65	0.267	0.733	0.383
	7.25571	0.6	0.267	0.733	0.333
	7.2922	0.6	0.2	0.8	0.4
	7.48513	0.55	0.2	0.8	0.35
	7.73384	0.5	0.2	0.8	0.3
	7.79864	0.5	0.133	0.867	0.367
	7.90618	0.5	0.067	0.933	0.433
	8.3766	0.5	0	1	0.5
	8.80853	0.45	0	1	0.45
	8.89682	0.4	0	1	0.4
	8.9314	0.35	0	1	0.35
	8.95135	0.3	0	1	0.3
	8.97678	0.25	0	1	0.25
	9.02906	0.2	0	1	0.2
	9.19218	0.15	0	1	0.15
	9.57193	0.1	0	1	0.1
	9.93023	0.05	0	1	0.05
	11.0328	0	0	1	0

## Sheet: Sheet2
CASC2								DLX6-AS1								FAM201A
	ΔCт	ΔΔCт	value	average	SE	P value			ΔCт	ΔΔCт	value	average	SE	P value			ΔCт	ΔΔCт	value	average	SE	P value
RR	5.10836	0	1	1.67916	0.370806			RR	7.06395	0	1	2.47176	1.02207			RR	6.12485	0	1	0.987584	0.183562		781148	潘爱娇	PD-2
RR	6.01911	0.910758	0.531906					RR	6.60177	-0.462179	1.37762					RR	5.84348	-0.281376	1.21535				883857	李德调	PD-3
RR	4.88515	-0.22321	1.16733					RR	7.02046	-0.043482	1.0306					RR	7.79106	1.66621	0.31508				884517	柯燕玲	PD-4
RR	5.97854	0.870184	0.547077					RR	9.36733	2.30338	0.202587					RR	6.9019	0.777051	0.583558				898656	林其同	PD-5
RR	3.11741	-1.99095	3.97498					RR	7.89847	0.834524	0.560768					RR	6.04808	-0.0767774	1.05466				911259	倪政华	PD-6
RR	4.47364	-0.634718	1.55263					RR	6.12592	-0.938027	1.91591					RR	6.49223	0.367381	0.775189				874111	蔡敦满	SD-1
RR	4.66338	-0.444975	1.36129					RR	7.98572	0.92177	0.527861					RR	7.29075	1.1659	0.445686				931034	陈财康	SD-2
RR	5.03338	-0.0749786	1.05335					RR	7.98033	0.916386	0.529835					RR	8.00613	1.88127	0.271444				833976	陈聪儿	SD-3
RR	4.2009	-0.907451	1.87573					RR	8.80888	1.74493	0.298348					RR	6.84383	0.718973	0.60753				920396	陈印度	SD-4
RR	5.11433	0.00597197	0.995869					RR	7.18522	0.121275	0.919375					RR	5.15043	-0.974421	1.96485				919311	陈志建	SD-5
RR	2.61229	-2.49607	5.64145					RR	4.77556	-2.28838	4.88509					RR	4.794	-1.33085	2.51551				923727	李华传	SD-6
RR	3.59761	-1.51075	2.84958					RR	5.07257	-1.99138	3.97617					RR	6.04104	-0.083808	1.05981				896357	李惠光	SD-7
RR	4.82916	-0.279191	1.21351					RR	6.65387	-0.410072	1.32875					RR	7.09503	0.970174	0.510445				910499	廖国昌	SD-8
RR	5.19073	0.082379	0.944499					RR	5.68087	-1.38308	2.60824					RR	4.99864	-1.12622	2.18286				918866	唐锦椿	SD-9
RR	6.1726	1.06425	0.478223					RR	3.07161	-3.99234	15.9153					RR	7.80623	1.68138	0.311785				914542	庄美蓉	PD-1
RS	6.80658	1.69822	0.308166	0.66877	0.120794	0.00665034		RS	3.56687	-3.49707	11.2908	8.08287	2.18409	0.0440733		RS	8.92365	2.7988	0.143707	0.436797	0.106795	0.00977818	924611	施时官	PR-15
RS	7.93635	2.828	0.140828					RS	5.80558	-1.25836	2.39224					RS	7.0967	0.971851	0.509852				910717	陈秋奎	PR-16
RS	7.77378	2.66542	0.157626					RS	6.78791	-0.276035	1.21086					RS	9.06812	2.94326	0.130014				908382	倪朝茂	PR-17
RS	8.62829	3.51994	0.0871753					RS	5.55237	-1.51158	2.85122					RS	7.02319	0.898339	0.536504				911696	陈秀快	PR-18
RS	5.94047	0.832111	0.561707					RS	4.20322	-2.86072	7.26378					RS	8.99	2.86515	0.137247				914636	郑仙宝	PR-19
RS	3.79014	-1.31821	2.49357					RS	6.35113	-0.712817	1.639					RS	7.03855	0.913699	0.530822				872963	陈德源	PR-1
RS	5.70355	0.595196	0.661954					RS	4.11907	-2.94488	7.7001					RS	8.93915	2.8143	0.142171				879976	陈梅琼	PR-2
RS	4.82486	-0.283497	1.21714					RS	3.6148	-3.44915	10.9219					RS	9.82761	3.70276	0.0767994				922713	胡义春	PR-3
RS	5.83761	0.729253	0.603216					RS	5.88443	-1.17952	2.26501					RS	6.90287	0.778019	0.583167				914314	江宗芳	PR-4
RS	5.72087	0.612515	0.654056					RS	3.85643	-3.20752	9.23761					RS	10.0328	3.908	0.0666156				876935	林世铿	PR-5
RS	6.00266	0.894303	0.538007					RS	5.96124	-1.1027	2.14757					RS	9.31624	3.19139	0.10947				905313	王鸿明	PR-6
RS	6.96543	1.85708	0.276035					RS	5.03492	-2.02903	4.08129					RS	7.67662	1.55176	0.341093				890718	温玉哥	PR-7
RS	5.91805	0.809695	0.570503					RS	7.22067	0.156724	0.89706					RS	7.22067	1.09582	0.467871				916390	吴庆辉	PR-8
RS	4.90379	-0.204567	1.15234					RS	2.29054	-4.7734	27.3488					RS	5.08062	-1.04424	2.06227				861900	吴孝善	PR-9
RS	6.10903	1.00067	0.499768					RS	1.78269	-5.28125	38.888					RS	8.86998	2.74513	0.149153				928062	徐文牵	PR-10
RS	5.49249	0.384139	0.766236					RS	5.39143	-1.67251	3.18769					RS	7.29365	1.1688	0.444792				880762	张平	PR-11
RS	6.84159	1.73323	0.300777					RS	3.00024	-4.0637	16.7223					RS	6.28545	0.160597	0.894655				912756	郑元森	PR-12
RS	5.79823	0.689872	0.619909					RS	8.13969	1.07575	0.474425					RS	8.74708	2.62222	0.162417				914542	庄美蓉	PR-13
RS	5.94119	0.83283	0.561427					RS	5.68908	-1.37487	2.59344					RS	8.96355	2.8387	0.139787				917763	龚永亭	PR-14
RS	4.83937	-0.268986	1.20496					RS	3.96899	-3.09496	8.54427					RS	5.97751	-0.147342	1.10753				890974	吴宝护	CR-1

## Sheet: Sheet7
C	D	F
2.61229	4.77556	4.794
5.19073	5.68087	4.99864
4.90379	2.29054	5.08062
5.11433	7.18522	5.15043
6.01911	6.60177	5.84348
4.83937	3.96899	5.97751
3.59761	5.07257	6.04104
3.11741	7.89847	6.04808
5.10836	7.06395	6.12485
6.84159	3.00024	6.28545
4.47364	6.12592	6.49223
4.2009	8.80888	6.84383
5.97854	9.36733	6.9019
5.83761	5.88443	6.90287
8.62829	5.55237	7.02319
3.79014	6.35113	7.03855
4.82916	6.65387	7.09503
7.93635	5.80558	7.0967
5.91805	7.22067	7.22067
4.66338	7.98572	7.29075
5.49249	5.39143	7.29365
6.96543	5.03492	7.67662
4.88515	7.02046	7.79106
6.1726	3.07161	7.80623
5.03338	7.98033	8.00613
5.79823	8.13969	8.74708
6.10903	1.78269	8.86998
6.80658	3.56687	8.92365
5.70355	4.11907	8.93915
5.94119	5.68908	8.96355
5.94047	4.20322	8.99
7.77378	6.78791	9.06812
6.00266	5.96124	9.31624
4.82486	3.6148	9.82761
5.72087	3.85643	10.0328

## Sheet: Sheet4
SD-6	4.794	4.794	0.0360463				923727	李华传		SD-1	6.49223	6.49223	0.0111082				874111	蔡敦满	SD-1	蔡敦满
SD-9	4.99864	4.99864	0.0312796				918866	唐锦椿		SD-2	7.29075	7.29075	0.00638652				931034	陈财康	SD-2	蔡玉兰
PR-9	5.08062	5.08062	0.0295517				861900	吴孝善		SD-3	8.00613	8.00613	0.0038897				833976	陈聪儿	SD-3	陈财康
SD-5	5.15043	5.15043	0.0281557				919311	陈志建		PR-1	7.03855	7.03855	0.0076065				872963	陈德源	PR-1	陈聪儿
883857	5.84348	5.84348	0.0174156				883857	李德调		PR-2	8.93915	8.93915	0.00203726				879976	陈梅琼	PR-2	陈德源
CR-1	5.97751	5.97751	0.0158705				890974	吴宝护		910717	7.0967	7.0967	0.007306				910717	陈秋奎	PR-16	陈梅琼
SD-7	6.04104	6.04104	0.0151867				896357	李惠光		911696	7.02319	7.02319	0.00768792				911696	陈秀快	PR-18	陈秋奎
911259	6.04808	6.04808	0.0151129				911259	倪政华		SD-4	6.84383	6.84383	0.00870569				920396	陈印度	SD-4	陈性建
781148	6.12485	6.12485	0.0143297	0.00816431	0.000701264		781148	潘爱娇		SD-5	5.15043	5.15043	0.0281557				919311	陈志建	SD-5	陈秀快
PR-12	6.28545	6.28545	0.0128201				912756	郑元森		PR-14	8.96355	8.96355	0.0020031				917763	龚永亭	PR-14	陈印度
SD-1	6.49223	6.49223	0.0111082				874111	蔡敦满		PR-3	9.82761	9.82761	0.00110051				922713	胡义春	PR-3	陈志建
SD-4	6.84383	6.84383	0.00870569				920396	陈印度		PR-4	6.90287	6.90287	0.00835658				914314	江宗芳	PR-4	龚永亭
898656	6.9019	6.9019	0.00836219				898656	林其同		884517	7.79106	7.79106	0.00451499				884517	柯燕玲	PD-4	胡义春
PR-4	6.90287	6.90287	0.00835658				914314	江宗芳		883857	5.84348	5.84348	0.0174156				883857	李德调	PD-3	江宗芳
911696	7.02319	7.02319	0.00768792				911696	陈秀快		SD-6	4.794	4.794	0.0360463				923727	李华传	SD-6	柯燕玲
PR-1	7.03855	7.03855	0.0076065				872963	陈德源		SD-7	6.04104	6.04104	0.0151867				896357	李惠光	SD-7	李德调
SD-8	7.09503	7.09503	0.00731449				910499	廖国昌		SD-8	7.09503	7.09503	0.00731449				910499	廖国昌	SD-8	李华传
910717	7.0967	7.0967	0.007306				910717	陈秋奎		898656	6.9019	6.9019	0.00836219				898656	林其同	PD-5	李惠光
PR-8	7.22067	7.22067	0.00670443				916390	吴庆辉		PR-5	10.0328	10.0328	0.000954578				876935	林世铿	PR-5	廖国昌
SD-2	7.29075	7.29075	0.00638652				931034	陈财康		908382	9.06812	9.06812	0.00186305				908382	倪朝茂	PR-17	林其同
PR-11	7.29365	7.29365	0.00637372				880762	张平		911259	6.04808	6.04808	0.0151129				911259	倪政华	PD-6	林世铿
PR-7	7.67662	7.67662	0.00488774				890718	温玉哥		781148	6.12485	6.12485	0.0143297	0.00973889	0.00257743		781148	潘爱娇	PD-2	林宗黎
884517	7.79106	7.79106	0.00451499				884517	柯燕玲		924611	8.92365	8.92365	0.00205927	0.00938575	0.00230282	0.626328	924611	施时官	PR-15	倪朝茂
PD-1	7.80623	7.80623	0.00446777				914542	庄美蓉		SD-9	4.99864	4.99864	0.0312796				918866	唐锦椿	SD-9	倪政华
SD-3	8.00613	8.00613	0.0038897				833976	陈聪儿		PR-6	9.31624	9.31624	0.00156867				905313	王鸿明	PR-6	潘爱娇
PR-13	8.74708	8.74708	0.00232738				914542	庄美蓉		PR-7	7.67662	7.67662	0.00488774				890718	温玉哥	PR-7	施时官
PR-10	8.86998	8.86998	0.00213732				928062	徐文牵		CR-1	5.97751	5.97751	0.0158705				890974	吴宝护	CR-1	唐锦椿
924611	8.92365	8.92365	0.00205927	0.00169414	9.87213e-05	0.000751276	924611	施时官		PR-8	7.22067	7.22067	0.00670443				916390	吴庆辉	PR-8	王鸿明
PR-2	8.93915	8.93915	0.00203726				879976	陈梅琼		PR-9	5.08062	5.08062	0.0295517				861900	吴孝善	PR-9	王植林
PR-14	8.96355	8.96355	0.0020031				917763	龚永亭		PR-10	8.86998	8.86998	0.00213732				928062	徐文牵	PR-10	魏伦雄
914636	8.99	8.99	0.0019667				914636	郑仙宝		PR-11	7.29365	7.29365	0.00637372				880762	张平	PR-11	温玉哥
908382	9.06812	9.06812	0.00186305				908382	倪朝茂		914636	8.99	8.99	0.0019667				914636	郑仙宝	PR-19	吴宝护
PR-6	9.31624	9.31624	0.00156867				905313	王鸿明		PR-12	6.28545	6.28545	0.0128201				912756	郑元森	PR-12	吴庆辉
PR-3	9.82761	9.82761	0.00110051				922713	胡义春		PD-1	7.80623	7.80623	0.00446777				914542	庄美蓉	PD-1	吴孝善
PR-5	10.0328	10.0328	0.000954578				876935	林世铿		PR-13	8.74708	8.74708	0.00232738				914542	庄美蓉	PR-13	徐文牵
	ΔCт	ΔΔCт	value	average	SE	P value					ΔCт	ΔΔCт	value	average	SE	P value				许荣国
FAM201A							casw no.			FAM201A							casw no.			张梅英
																				张平
																				郑仙宝
																				郑元森
																				庄美蓉

## Sheet: 整理后的数据
CASC2							response
	ΔCт	ΔΔCт	value	average	SE	P value		case no.
781148	5.10836	0	1	1.67916	0.370806		PD-2	1
883857	6.01911	0.910758	0.531906				PD-3	2
884517	4.88515	-0.22321	1.16733				PD-4	3
898656	5.97854	0.870184	0.547077				PD-5	4
911259	3.11741	-1.99095	3.97498				PD-6	5
SD-1	4.47364	-0.634718	1.55263				SD-1	6
SD-2	4.66338	-0.444975	1.36129				SD-2	7
SD-3	5.03338	-0.0749786	1.05335				SD-3	8
SD-4	4.2009	-0.907451	1.87573				SD-4	9
SD-5	5.11433	0.00597197	0.995869				SD-5	10
SD-6	2.61229	-2.49607	5.64145				SD-6	11
SD-7	3.59761	-1.51075	2.84958				SD-7	12
SD-8	4.82916	-0.279191	1.21351				SD-8	13
SD-9	5.19073	0.082379	0.944499				SD-9	14
PD-1	6.1726	1.06425	0.478223				PD-1	15
924611	6.80658	1.69822	0.308166	0.66877	0.120794	0.00665034	PR-15	16
910717	7.93635	2.828	0.140828				PR-16	17
908382	7.77378	2.66542	0.157626				PR-17	18
911696	8.62829	3.51994	0.0871753				PR-18	19
914636	5.94047	0.832111	0.561707				PR-19	20
PR-1	3.79014	-1.31821	2.49357				PR-1	21
PR-2	5.70355	0.595196	0.661954				PR-2	22
PR-3	4.82486	-0.283497	1.21714				PR-3	23
PR-4	5.83761	0.729253	0.603216				PR-4	24
PR-5	5.72087	0.612515	0.654056				PR-5	25
PR-6	6.00266	0.894303	0.538007				PR-6	26
PR-7	6.96543	1.85708	0.276035				PR-7	27
PR-8	5.91805	0.809695	0.570503				PR-8	28
PR-9	4.90379	-0.204567	1.15234				PR-9	29
PR-10	6.10903	1.00067	0.499768				PR-10	30
PR-11	5.49249	0.384139	0.766236				PR-11	31
PR-12	6.84159	1.73323	0.300777				PR-12	32
PR-13	5.79823	0.689872	0.619909				PR-13	33
PR-14	5.94119	0.83283	0.561427				PR-14	34
CR-1	4.83937	-0.268986	1.20496				CR-1	35
DLX6-AS1							response
	ΔCт	ΔΔCт	value	average	SE	P value
781148	7.06395	0	1	2.47176	1.02207		PD-2	1
883857	6.60177	-0.462179	1.37762				PD-3	2
884517	7.02046	-0.043482	1.0306				PD-4	3
898656	9.36733	2.30338	0.202587				PD-5	4
911259	7.89847	0.834524	0.560768				PD-6	5
SD-1	6.12592	-0.938027	1.91591				SD-1	6
SD-2	7.98572	0.92177	0.527861				SD-2	7
SD-3	7.98033	0.916386	0.529835				SD-3	8
SD-4	8.80888	1.74493	0.298348				SD-4	9
SD-5	7.18522	0.121275	0.919375				SD-5	10
SD-6	4.77556	-2.28838	4.88509				SD-6	11
SD-7	5.07257	-1.99138	3.97617				SD-7	12
SD-8	6.65387	-0.410072	1.32875				SD-8	13
SD-9	5.68087	-1.38308	2.60824				SD-9	14
PD-1	3.07161	-3.99234	15.9153				PD-1	15
924611	3.56687	-3.49707	11.2908	8.08287	2.18409	0.0440733	PR-15	16
910717	5.80558	-1.25836	2.39224				PR-16	17
908382	6.78791	-0.276035	1.21086				PR-17	18
911696	5.55237	-1.51158	2.85122				PR-18	19
914636	4.20322	-2.86072	7.26378				PR-19	20
PR-1	6.35113	-0.712817	1.639				PR-1	21
PR-2	4.11907	-2.94488	7.7001				PR-2	22
PR-3	3.6148	-3.44915	10.9219				PR-3	23
PR-4	5.88443	-1.17952	2.26501				PR-4	24
PR-5	3.85643	-3.20752	9.23761				PR-5	25
PR-6	5.96124	-1.1027	2.14757				PR-6	26
PR-7	5.03492	-2.02903	4.08129				PR-7	27
PR-8	7.22067	0.156724	0.89706				PR-8	28
PR-9	2.29054	-4.7734	27.3488				PR-9	29
PR-10	1.78269	-5.28125	38.888				PR-10	30
PR-11	5.39143	-1.67251	3.18769				PR-11	31
PR-12	3.00024	-4.0637	16.7223				PR-12	32
PR-13	8.13969	1.07575	0.474425				PR-13	33
PR-14	5.68908	-1.37487	2.59344				PR-14	34
CR-1	3.96899	-3.09496	8.54427				CR-1	35
FAM201A							response
	ΔCт	ΔΔCт	value	average	SE	P value
781148	6.12485	0	1	0.987584	0.183562		PD-2	1
883857	5.84348	-0.281376	1.21535				PD-3	2
884517	7.79106	1.66621	0.31508				PD-4	3
898656	6.9019	0.777051	0.583558				PD-5	4
911259	6.04808	-0.0767774	1.05466				PD-6	5
SD-1	6.49223	0.367381	0.775189				SD-1	6
SD-2	7.29075	1.1659	0.445686				SD-2	7
SD-3	8.00613	1.88127	0.271444				SD-3	8
SD-4	6.84383	0.718973	0.60753				SD-4	9
SD-5	5.15043	-0.974421	1.96485				SD-5	10
SD-6	4.794	-1.33085	2.51551				SD-6	11
SD-7	6.04104	-0.083808	1.05981				SD-7	12
SD-8	7.09503	0.970174	0.510445				SD-8	13
SD-9	4.99864	-1.12622	2.18286				SD-9	14
PD-1	7.80623	1.68138	0.311785				PD-1	15
924611	8.92365	2.7988	0.143707	0.436797	0.106795	0.00977818	PR-15	16
910717	7.0967	0.971851	0.509852				PR-16	17
908382	9.06812	2.94326	0.130014				PR-17	18
911696	7.02319	0.898339	0.536504				PR-18	19
914636	8.99	2.86515	0.137247				PR-19	20
PR-1	7.03855	0.913699	0.530822				PR-1	21
PR-2	8.93915	2.8143	0.142171				PR-2	22
PR-3	9.82761	3.70276	0.0767994				PR-3	23
PR-4	6.90287	0.778019	0.583167				PR-4	24
PR-5	10.0328	3.908	0.0666156				PR-5	25
PR-6	9.31624	3.19139	0.10947				PR-6	26
PR-7	7.67662	1.55176	0.341093				PR-7	27
PR-8	7.22067	1.09582	0.467871				PR-8	28
PR-9	5.08062	-1.04424	2.06227				PR-9	29
PR-10	8.86998	2.74513	0.149153				PR-10	30
PR-11	7.29365	1.1688	0.444792				PR-11	31
PR-12	6.28545	0.160597	0.894655				PR-12	32
PR-13	8.74708	2.62222	0.162417				PR-13	33
PR-14	8.96355	2.8387	0.139787				PR-14	34
CR-1	5.97751	-0.147342	1.10753				CR-1	35

## Sheet: CASC2
	ΔCт	ΔΔCт	value	住院号	姓名	response
RR	4.47364	0	1	874111	蔡敦满	SD-1
RR	4.66338	0.189743	0.876762	931034	陈财康	SD-2
RR	5.03338	0.559739	0.678425	833976	陈聪儿	SD-3
RS	3.79014	-0.683494	1.60602	872963	陈德源	PR-1
RS	5.70355	1.22991	0.426343	879976	陈梅琼	PR-2
RS	7.93635	3.46271	0.0907026	910717	陈秋奎	PR-16
RS	8.62829	4.15465	0.0561467	911696	陈秀快	PR-18
RR	4.2009	-0.272733	1.20809	920396	陈印度	SD-4
RR	5.11433	0.64069	0.641406	919311	陈志建	SD-5
RS	5.94119	1.46755	0.361596	917763	龚永亭	PR-14
RS	4.82486	0.35122	0.783921	922713	胡义春	PR-3
RS	5.83761	1.36397	0.388511	914314	江宗芳	PR-4
RR	4.88515	0.411508	0.751837	884517	柯燕玲	PD-4
RR	6.01911	1.54548	0.342583	883857	李德调	PD-3
RR	2.61229	-1.86135	3.63347	923727	李华传	SD-6
RR	3.59761	-0.876029	1.83532	896357	李惠光	SD-7
RR	4.82916	0.355527	0.781584	910499	廖国昌	SD-8
RR	5.97854	1.5049	0.352354	898656	林其同	PD-5
RS	5.72087	1.24723	0.421256	876935	林世铿	PR-5
RS	7.77378	3.30014	0.101522	908382	倪朝茂	PR-17
RR	3.11741	-1.35623	2.56015	911259	倪政华	PD-6
RR	5.10836	0.634718	0.644067	781148	潘爱娇	PD-2
RS	6.80658	2.33294	0.19848	924611	施时官	PR-15
RR	5.19073	0.717097	0.60832	918866	唐锦椿	SD-9
RS	6.00266	1.52902	0.346513	905313	王鸿明	PR-6
RS	6.96543	2.49179	0.177785	890718	温玉哥	PR-7
RS	4.83937	0.365732	0.776075	890974	吴宝护	CR-1
RS	5.91805	1.44441	0.367442	916390	吴庆辉	PR-8
RS	4.90379	0.430151	0.742184	861900	吴孝善	PR-9
RS	6.10903	1.63539	0.321884	928062	徐文牵	PR-10
RS	5.49249	1.01886	0.493507	880762	张平	PR-11
RS	5.94047	1.46683	0.361777	914636	郑仙宝	PR-19
RS	6.84159	2.36795	0.193721	912756	郑元森	PR-12
RR	6.1726	1.69896	0.308007	914542	庄美蓉	PD-1
RS	5.79823	1.32459	0.399263	914542	庄美蓉	PR-13

## Sheet: DLX6-AS1
	ΔCт	住院号	姓名	response
RR	6.12592	874111	蔡敦满	SD-1
RR	7.98572	931034	陈财康	SD-2
RR	7.98033	833976	陈聪儿	SD-3
RS	6.35113	872963	陈德源	PR-1
RS	4.11907	879976	陈梅琼	PR-2
RS	5.80558	910717	陈秋奎	PR-16
RS	5.55237	911696	陈秀快	PR-18
RR	8.80888	920396	陈印度	SD-4
RR	7.18522	919311	陈志建	SD-5
RS	5.68908	917763	龚永亭	PR-14
RS	3.6148	922713	胡义春	PR-3
RS	5.88443	914314	江宗芳	PR-4
RR	7.02046	884517	柯燕玲	PD-4
RR	6.60177	883857	李德调	PD-3
RR	4.77556	923727	李华传	SD-6
RR	5.07257	896357	李惠光	SD-7
RR	6.65387	910499	廖国昌	SD-8
RR	9.36733	898656	林其同	PD-5
RS	3.85643	876935	林世铿	PR-5
RS	6.78791	908382	倪朝茂	PR-17
RR	7.89847	911259	倪政华	PD-6
RR	7.06395	781148	潘爱娇	PD-2
RS	3.56687	924611	施时官	PR-15
RR	5.68087	918866	唐锦椿	SD-9
RS	5.96124	905313	王鸿明	PR-6
RS	5.03492	890718	温玉哥	PR-7
RS	3.96899	890974	吴宝护	CR-1
RS	7.22067	916390	吴庆辉	PR-8
RS	2.29054	861900	吴孝善	PR-9
RS	1.78269	928062	徐文牵	PR-10
RS	5.39143	880762	张平	PR-11
RS	4.20322	914636	郑仙宝	PR-19
RS	3.00024	912756	郑元森	PR-12
RR	3.07161	914542	庄美蓉	PD-1
RS	8.13969	914542	庄美蓉	PR-13
