# Supplementary material for: Long Noncoding RNA FAM201A Mediates the Radiosensitivity of Esophageal Squamous Cell Cancer by Regulating ATM and mTOR Expression via miR-101
Source: Front Genet. 2018 Dec 5;9:611. doi: 10.3389/fgene.2018.00611 (PMC6292217; doi:10.3389/fgene.2018.00611)
Supplement: File S1 — Results of lncRNA chip microarray. [file Data_Sheet_1.ZIP › Supplementary File/Supplementary file 4--Validation of FAM201A in vitro and vivo/Supplementary file--Annexin-V for cell apoptosis.xls]

## Sheet: Sheet1
ECA109								ECA109R
	0Gy	2Gy	4Gy	6Gy	8Gy	10Gy			0Gy	2Gy	4Gy	6Gy	8Gy	10Gy
NC	6.01	17.3	31.8	41.3	59.9	69.1		NC	3.39	9.42	19.9	25	47.5	57.7
	5.76	18.2	30.4	42.1	58.6	67.2			4.01	8.88	18.3	26.5	45.6	57.1
	6.82	17.07	31.9	40.5	59.8	68.7			3.25	8.65	20.1	24.2	47.2	56.2
average	6.19667	17.5233	31.3667	41.3	59.4333	68.3333		average	3.55	8.98333	19.4333	25.2333	46.7667	57
SD	0.554106	0.597188	0.83865	0.8	0.723418	1.00167		SD	0.404475	0.395264	0.986577	1.16762	1.02144	0.754983
FAM201a	2.38	13.5	22.4	31.1	43.7	53.3		FAM201a	2.79	7.62	13	21.3	36.7	50.1
	2.75	14	21.2	30.6	45.1	51.8			3.28	7.04	12.1	20.3	34.1	49.6
	3.88	15.4	22.9	30.4	41.9	50.2			3.33	7.58	12.5	20.5	35.3	48.2
average	3.00333	14.3	22.1667	30.7	43.5667	51.7667		average	3.13333	7.41333	12.5333	20.7	35.3667	49.3
SD	0.78143	0.984886	0.873689	0.360555	1.60416	1.55027		SD	0.298385	0.323934	0.450925	0.52915	1.30128	0.984886
P值	0.00446771	0.00835639	0.000192699	3.08377e-05	9.81694e-05	9.99407e-05		P值	0.22439	0.00600112	0.000385777	0.00359919	0.000282279	0.000424939
sh-NC	2.79	18.1	29.1	40.6	51.5	67.7		sh-NC	4.65	12.2	15.1	28.5	44.6	57.4
	3.15	17.5	28.6	41.2	50.2	67.2			4.28	11.5	14.3	27.5	42.9	55.9
	3.33	19.2	28.4	39.6	50.6	68.3			4.11	10.6	14.8	27.3	41.8	54.2
average	3.09	18.2667	28.7	40.4667	50.7667	67.7333		average	4.34667	11.4333	14.7333	27.7667	43.1	55.8333
SD	0.274955	0.862168	0.360555	0.80829	0.665833	0.550757		SD	0.276104	0.802081	0.404145	0.64291	1.41067	1.60104
sh-FAM201a	2.76	28.2	45.8	60.6	75.4	84.3		sh-FAM201a	4.09	12.5	23.1	31.1	52	69.6
	2.77	27.9	43.2	58.3	70.4	84.7			4.23	12.4	20.1	31	51.4	68.5
	2.51	27.5	44.1	59.7	71.3	81.2			4.05	11.6	21.9	30.1	52.4	67.2
average	2.68	27.8667	44.3667	59.5333	72.3667	83.4		average	4.12333	12.1667	21.7	30.7333	51.9333	68.4333
SD	0.147309	0.351188	1.32035	1.15902	2.66521	1.91572		SD	0.0945163	0.493288	1.50997	0.550757	0.503322	1.20139
P value	0.0851046	5.77439e-05	3.81858e-05	1.98673e-05	0.000168327	0.000168596		P value	0.255642	0.248672	0.00151595	0.00372135	0.000517545	0.00040181
ECA109								ECA109R
	0Gy	2Gy	4Gy	6Gy	8Gy	10Gy			0Gy	2Gy	4Gy	6Gy	8Gy	10Gy
NC	6.19667	17.5233	31.3667	41.3	59.4333	68.3333		NC	3.55	8.98333	19.4333	25.2333	46.7667	57
FAM201a	3.00333	14.3	22.1667	30.7	43.5667	51.7667		FAM201a	3.13333	7.41333	12.5333	20.7	35.3667	49.3
sh-NC	3.09	18.2667	28.7	40.4667	50.7667	67.7333		sh-NC	4.34667	11.4333	14.7333	27.7667	43.1	55.8333
sh-FAM201a	2.68	27.8667	44.3667	59.5333	72.3667	83.4		sh-FAM201a	4.12333	12.1667	21.7	30.7333	51.9333	68.4333
SD	0.554106	0.597188	0.83865	0.8	0.723418	1.00167		SD	0.404475	0.395264	0.986577	1.16762	1.02144	0.754983
	0.78143	0.984886	0.873689	0.360555	1.60416	1.55027			0.298385	0.323934	0.450925	0.52915	1.30128	0.984886
	0.274955	0.862168	0.360555	0.80829	0.665833	0.550757			0.276104	0.802081	0.404145	0.64291	1.41067	1.60104
	0.147309	0.351188	1.32035	1.15902	2.66521	1.91572			0.0945163	0.493288	1.50997	0.550757	0.503322	1.20139
