# Supplementary material for: Long Noncoding RNA FAM201A Mediates the Radiosensitivity of Esophageal Squamous Cell Cancer by Regulating ATM and mTOR Expression via miR-101
Source: Front Genet. 2018 Dec 5;9:611. doi: 10.3389/fgene.2018.00611 (PMC6292217; doi:10.3389/fgene.2018.00611)
Supplement: File S1 — Results of lncRNA chip microarray. [file Data_Sheet_1.ZIP › Supplementary File/Supplementary file 4--Validation of FAM201A in vitro and vivo/Supplementary file--MTT for Eca109 cell radiation.xls]

## Sheet: Sheet1
		0Gy	2Gy	4Gy	6Gy	8Gy	10Gy			0Gy	2Gy	4Gy	6Gy	8Gy	10Gy
	NC	1.206	1.135	1.091	0.834	0.692	0.405			0.952105	0.896053	0.861316	0.658421	0.546316	0.319737
		1.33	1.224	1.075	0.811	0.569	0.435			1.05	0.966316	0.848684	0.640263	0.449211	0.343421
		1.264	1.129	0.928	0.883	0.658	0.456			0.997895	0.891316	0.732632	0.697105	0.519474	0.36
	average	1.26667							average	1	0.917895	0.814211	0.665263	0.505	0.341053
									SD	0.0489813	0.0420007	0.0709312	0.0290322	0.0501445	0.0202358
	FAM201A	1.201	1.105	1.102	0.911	0.796	0.661			1.01579	0.934593	0.932055	0.77051	0.673245	0.559064
		1.211	1.208	1.067	0.934	0.835	0.559			1.02425	1.02171	0.902453	0.789963	0.706231	0.472794
		1.135	1.112	1.027	0.969	0.754	0.638			0.959966	0.940513	0.868621	0.819566	0.637722	0.539611
	average	1.18233							average	1	0.965605	0.901043	0.793346	0.672399	0.523823
	P value	0.12157	0.666716	0.577937	0.024535	0.023348	0.00543617		SD	0.0349273	0.0486774	0.0317404	0.0247021	0.0342621	0.0452502
	si-NC	1.307	1.134	1.064	0.851	0.603	0.361			1.0059	0.872755	0.818881	0.654951	0.464084	0.277835
		1.223	1.21	1.103	0.888	0.624	0.405			0.941252	0.931247	0.848897	0.683427	0.480246	0.311698
		1.368	1.228	0.999	0.734	0.683	0.389			1.05285	0.9451	0.768856	0.564905	0.525654	0.299384
	average	1.29933							average	1	0.916367	0.812211	0.634428	0.489995	0.296306
									SD	0.0560313	0.0383991	0.0404353	0.0618691	0.0319217	0.0171404
	si-FAM201A	1.318	1.156	0.901	0.717	0.564	0.217			1.02462	0.898678	0.700441	0.557398	0.438456	0.168697
		1.241	1.035	0.964	0.738	0.484	0.168			0.964758	0.804613	0.749417	0.573724	0.376263	0.130604
		1.3	1.185	1.054	0.742	0.364	0.137			1.01062	0.921223	0.819383	0.576833	0.282975	0.106504
	average	1.28633							average	1	0.874838	0.756414	0.569318	0.365898	0.135268
	P value	0.80007	0.294635	0.200465	0.122234	0.0575297	0.00136774		SD	0.0313124	0.0618529	0.0597792	0.0104396	0.0782569	0.0313574
										0Gy	2Gy	4Gy	6Gy	8Gy	10Gy
									NC	1	0.917895	0.814211	0.665263	0.505	0.341053
									FAM201A	1	0.965605	0.901043	0.793346	0.672399	0.523823
									si-NC	1	0.916367	0.812211	0.634428	0.489995	0.296306
									si-FAM201A	1	0.874838	0.756414	0.569318	0.365898	0.135268
