# Supplementary material for: Long Noncoding RNA FAM201A Mediates the Radiosensitivity of Esophageal Squamous Cell Cancer by Regulating ATM and mTOR Expression via miR-101
Source: Front Genet. 2018 Dec 5;9:611. doi: 10.3389/fgene.2018.00611 (PMC6292217; doi:10.3389/fgene.2018.00611)
Supplement: File S1 — Results of lncRNA chip microarray. [file Data_Sheet_1.ZIP › Supplementary File/Supplementary file 4--Validation of FAM201A in vitro and vivo/Supplementary file--MTT for Eca109R cell radiation.xls]

## Sheet: Sheet1
	ECA109-R
		0Gy	2Gy	4Gy	6Gy	8Gy	10Gy			0Gy	2Gy	4Gy	6Gy	8Gy	10Gy
	NC	1.021	0.834	0.903	0.927	0.868	0.799			1.05913	0.865145	0.936722	0.961618	0.900415	0.828838
		0.908	1.067	0.916	0.818	0.837	0.867			0.941909	1.10685	0.950207	0.848548	0.868257	0.899378
		0.963	1.052	1.008	0.763	0.727	0.637			0.998963	1.09129	1.04564	0.791494	0.754149	0.660788
	average	0.964							average	1	1.02109	0.977524	0.86722	0.840941	0.796335
									SD	0.0586168	0.135278	0.0593768	0.0865856	0.0768639	0.122571
	FAM201A	1.037	1.061	1.003	0.991	0.895	0.871			1.04712	1.07136	1.01279	1.00067	0.903736	0.879502
		1.016	0.904	0.921	0.966	0.968	0.892			1.02592	0.912824	0.92999	0.975429	0.977449	0.900707
		0.918	1.031	0.936	0.904	0.841	0.907			0.926961	1.04106	0.945136	0.912824	0.849209	0.915853
	average	0.990333							average	1	1.00841	0.962639	0.962975	0.910131	0.898687
	P value	0.620055	0.880333	0.804354	0.0978191	0.183387	0.150978		SD	0.0641364	0.0841582	0.0440878	0.0452293	0.0643586	0.0182597
	si-NC	0.92	1.008	0.939	0.817	0.774	0.764			0.966048	1.05845	0.985999	0.857893	0.812741	0.80224
		1.019	0.931	0.814	0.863	0.801	0.737			1.07	0.977599	0.854743	0.906195	0.841092	0.773889
		0.918	0.913	0.835	0.726	0.7641	0.681			0.963948	0.958698	0.876794	0.762338	0.802345	0.715086
	average	0.952333							average	1	0.99825	0.905845	0.842142	0.818726	0.763738
									SD	0.0606339	0.0529869	0.0702856	0.0732106	0.0200549	0.044455
	si-FAM201A	1.011	0.902	0.836	0.737	0.614	0.505			1.06458	0.949807	0.880309	0.776062	0.646543	0.531766
		0.905	0.901	0.708	0.722	0.624	0.531			0.952966	0.948754	0.745525	0.760267	0.657073	0.559144
		0.933	0.867	0.767	0.674	0.664	0.561			0.98245	0.912952	0.807652	0.709723	0.699193	0.590734
	average	0.949667							average	1	0.937171	0.811162	0.748684	0.667603	0.560548
	P value	0.956565	0.124832	0.159414	0.110392	0.00150543	0.00265141		SD	0.0578416	0.0209809	0.0674606	0.0346532	0.0278598	0.0295091
										0Gy	2Gy	4Gy	6Gy	8Gy	10Gy
									NC	1	1.02109	0.977524	0.86722	0.840941	0.796335
									FAM201A	1	1.00841	0.962639	0.962975	0.910131	0.898687
									si-NC	1	0.99825	0.905845	0.842142	0.818726	0.763738
									si-FAM201A	1	0.937171	0.811162	0.748684	0.667603	0.560548
