# Supplementary material for: Long Noncoding RNA FAM201A Mediates the Radiosensitivity of Esophageal Squamous Cell Cancer by Regulating ATM and mTOR Expression via miR-101
Source: Front Genet. 2018 Dec 5;9:611. doi: 10.3389/fgene.2018.00611 (PMC6292217; doi:10.3389/fgene.2018.00611)
Supplement: File S1 — Results of lncRNA chip microarray. [file Data_Sheet_1.ZIP › Supplementary File/Supplementary file 4--Validation of FAM201A in vitro and vivo/Supplementary file--PCR transfection FAM201A in ECSS cell/Supplementary file 5--PCR transfection FAM201A in Eca109 .xls]

## Sheet: Results
Sample Name	Target Name	Cт	ΔCт	ΔCт Mean	SD
ctrl	GAPDH	17.6215
ctrl	GAPDH	17.9157
ctrl	GAPDH	17.9762
NC	GAPDH	18.7832
NC	GAPDH	18.8912
NC	GAPDH	18.9985
FAM201A	GAPDH	16.048
FAM201A	GAPDH	16.2188
FAM201A	GAPDH	16.6482
si-NC	GAPDH	17.1128
si-NC	GAPDH	17.4726
si-NC	GAPDH	17.6228
si-FAM201A	GAPDH	16.063
si-FAM201A	GAPDH	16.4397
si-FAM201A	GAPDH	16.4708
ctrl	FAM201A	22.1394	4.51796	4.4715	0.0839788			ΔCт	ΔΔCт	value	SE
ctrl	FAM201A	22.2903	4.37456				ctrl	4.4715	0	1	0.0839788
ctrl	FAM201A	22.4982	4.52199				NC	4.34508	-0.126421	1.09158	0.080889
NC	FAM201A	23.0737	4.29041	4.34508	0.080889		FAM201A	2.75308	-1.71843	3.29077	0.104827
NC	FAM201A	23.1981	4.30683				si-NC	4.60438	0.132879	0.912009	0.0670537
NC	FAM201A	23.4366	4.438				si-FAM201A	6.12575	1.65425	0.317704	0.0745389
FAM201A	FAM201A	18.7012	2.6532	2.75308	0.104827
FAM201A	FAM201A	19.0811	2.86224
FAM201A	FAM201A	19.392	2.74379
si-NC	FAM201A	21.7738	4.66098	4.60438	0.0670537
si-NC	FAM201A	22.0029	4.53033
si-NC	FAM201A	22.2447	4.62184
si-FAM201A	FAM201A	22.1233	6.0603	6.12575	0.0745389
si-FAM201A	FAM201A	22.5498	6.11007
si-FAM201A	FAM201A	22.6777	6.20688
