# Supplementary material for: Long Noncoding RNA FAM201A Mediates the Radiosensitivity of Esophageal Squamous Cell Cancer by Regulating ATM and mTOR Expression via miR-101
Source: Front Genet. 2018 Dec 5;9:611. doi: 10.3389/fgene.2018.00611 (PMC6292217; doi:10.3389/fgene.2018.00611)
Supplement: File S1 — Results of lncRNA chip microarray. [file Data_Sheet_1.ZIP › Supplementary File/Supplementary file 4--Validation of FAM201A in vitro and vivo/Supplementary file--PCR transfection FAM201A in ECSS cell/Supplementary file 6--PCR transfection FAM201A in Eca109R.xls]

## Sheet: Results
Sample Name	Target Name	Cт	ΔCт	ΔCт Mean	SD
ctrl	GAPDH	18.1832
ctrl	GAPDH	18.6131
ctrl	GAPDH	18.7176
NC	GAPDH	19.3887
NC	GAPDH	19.5906
NC	GAPDH	19.7767
FAM201A	GAPDH	19.117
FAM201A	GAPDH	19.1868
FAM201A	GAPDH	19.7741
si-NC	GAPDH	18.689
si-NC	GAPDH	18.7308
si-NC	GAPDH	18.8757
si-FAM201A	GAPDH	19.3795
si-FAM201A	GAPDH	19.6928
si-FAM201A	GAPDH	19.8068
ctrl	FAM201A	22.2782	4.09498	4.04704	0.0437816			ΔCт	ΔΔCт	value	SE
ctrl	FAM201A	22.6501	4.03699				ctrl	4.04704	0	1	0.0437816
ctrl	FAM201A	22.7268	4.00916				NC	4.06968	0.0226424	0.984428	0.049291
NC	FAM201A	23.4763	4.08766	4.06968	0.049291		FAM201A	1.27546	-2.77159	6.82858	0.120064
NC	FAM201A	23.6045	4.01393				si-NC	3.7063	-0.340746	1.26641	0.112635
NC	FAM201A	23.8841	4.10747				si-FAM201A	5.27074	1.2237	0.428184	0.0645639
FAM201A	FAM201A	20.4051	1.28816	1.27546	0.120064
FAM201A	FAM201A	20.5755	1.38866
FAM201A	FAM201A	20.9237	1.14955
si-NC	FAM201A	22.3357	3.64673	3.7063	0.112635
si-NC	FAM201A	22.3667	3.63595
si-NC	FAM201A	22.7119	3.83621
si-FAM201A	FAM201A	24.609	5.22943	5.27074	0.0645639
si-FAM201A	FAM201A	24.9305	5.23765
si-FAM201A	FAM201A	25.152	5.34514
