# Supplementary material for: Long Noncoding RNA FAM201A Mediates the Radiosensitivity of Esophageal Squamous Cell Cancer by Regulating ATM and mTOR Expression via miR-101
Source: Front Genet. 2018 Dec 5;9:611. doi: 10.3389/fgene.2018.00611 (PMC6292217; doi:10.3389/fgene.2018.00611)
Supplement: File S1 — Results of lncRNA chip microarray. [file Data_Sheet_1.ZIP › Supplementary File/Supplementary file 4--Validation of FAM201A in vitro and vivo/Supplementary file--weight and volume of xenograft mouse.xls]

## Sheet: Sheet1
裸鼠皮下成瘤实验记录
			1周	2周	3周	4周	5周	6周
Ctrl	1	长	/	/	0.31	0.84	2017.11.01 die
		宽	/	/	0.18	0.67				anatomy					tumor volume（cm3）
		体重	25.8	26.3	25.2	24.5				group	No.	Volume(cm3)	weirht(g)
		体积			0.005022	0.188538				Ctrl	1	2017.11.01die				Ctrl	NC	Sh-FAM201A
	2	长	/	/	0.79	1.05	1.34	1.68			2	1.03496	1.149		1		0.8833	0.237578
		宽	/	/	0.55	0.87	0.98	1.11			3	0.399675	0.868		2	1.03496
		体重	21.7	22.5	22.6	22.8	23.2	23.1			4	0.394272	0.699		3	0.399675	0.3375
		体积			0.119488	0.397372	0.643468	1.03496			5	2017.10.23die 1.079			4	0.394272		0.26426
	3	长	/	/	0.75	0.98	1.13	1.5		NC	1	0.8833	1.156		5		0.365098
		宽	/	/	0.67	0.7	0.72	0.73			2	2017.10.20die			average	0.609637	0.528633	0.250919
		体重	25.4	26	24	24.2	24.5	24.6			3	0.3375	0.689		sd	0.212669	0.177512	0.0133409
		体积			0.168338	0.2401	0.292896	0.399675			4	2017.11.07die
	4	长	/	/	0.59	0.76	0.97	1.44			5	0.365098	0.63		tumor weight（g）
		宽	/	/	0.48	0.52	0.65	0.74		Sh-FAM201A	1	0.237578	0.36
		体重	27.9	28.6	28.4	28.6	28.7	28.3			2	2017.11.01die 0.668				Ctrl	NC	Sh-FAM201A
		体积			0.067968	0.102752	0.204912	0.394272			3	2017.10.22die 0.699			1		1.156	0.36
	5	长	/	/	0.6	2017.10.23die					4	0.26426	0.385		2	1.149
		宽	/	/	0.48						5	2017.11.06die 0.481			3	0.868	0.689
		体重	22	22.6	18.1										4	0.699		0.385
		体积			0.06912										5		0.63
NC	1	长	/	/	0.62	0.85	1.17	1.46							average	0.905333	0.825	0.3725
		宽	/	/	0.57	0.64	0.83	1.1							sd	0.131238	0.166374	0.0125
		体重	21.1	21.6	20.6	20.9	21.3	21.5
		体积			0.100719	0.17408	0.403006	0.8833							Table 1: Change of the volume and weight in different group mouse
	2	长	/	/	1.3	2017.10.20die
		宽	/	/	0.7										group	total	alive	tumor weight （mg）	tumor vlume （cm3）
		体重	18.9	19.5	18.8
		体积			0.3185										Ctrl	5	3	0.905±0.131	0.610±0.213
	3	长	/	/	1.09	1.12	1.18	1.2							NC	5	3	0.825±0.166	0.529±0.178
		宽	/	/	0.66	0.68	0.71	0.75							Sh-FAM201A	5	2	0.373±0.013	0.251±0.013
		体重	18.1	18.7	19.3	19.5	19.9	19.8
		体积			0.237402	0.258944	0.297419	0.3375
	4	长	/	/	0.78	0.94	1.23	2017.11.07die
		宽	/	/	0.73	0.81	0.96
		体重	20.8	21.4	21.2	20.9	20.5
		体积			0.207831	0.308367	0.566784
	5	长	/	/	0.34	0.57	0.85	1.17
		宽	/	/	0.21	0.36	0.61	0.79
		体重	19.1	19.7	20.7	20.9	21.5	21.8
		体积			0.007497	0.036936	0.158142	0.365099
Sh-FAM201A	1	长	/	/	0.79	0.84	0.91	0.956
		宽	/	/	0.61	0.65	0.68	0.705
		体重	20.8	21.3	22	22.3	22.5	22.9
		体积			0.146979	0.17745	0.210392	0.237578
	2	长	/	/	0.59	0.94	2017.11.01die
		宽	/	/	0.35	0.72
		体重	17.8	18.3	19	18.6
		体积			0.0361375	0.243648
	3	长	/	/	/	2017.10.22die
		宽	/	/	/
		体重	22.1	22.5	22.3
		体积
	4	长	/	/	0.76	0.75	0.84	0.981
		宽	/	/	0.48	0.57	0.65	0.734
		体重	20.1	20.6	21.1	21.5	21.8	22
		体积			0.087552	0.121837	0.17745	0.26426
	5	长	/	/	0.76	0.98	1.54	2017.11.06die
		宽	/	/	0.63	0.68	0.83
		体重	19.2	19.8	19.2	18.9	18.5
		体积			0.150822	0.226576	0.530453

## Sheet: 肿瘤生长曲线
		3周	4周	5周	6周
Ctrl	1	2017.11.01死亡
	2	0.119487	0.397373	0.643468	1.03496
	3	0.168338	0.2401	0.292896	0.399675
	4	0.067968	0.102752	0.204912	0.394272
	5	2017.10.23死亡
	average	0.118598	0.246741	0.380426	0.609637
	sd	0.0289776	0.0851144	0.133951	0.212669
NC	1	0.100719	0.17408	0.403006	0.8833
	2	2017.10.20死亡
	3	0.237402	0.258944	0.297419	0.3375
	4	2017.11.07死亡
	5	0.007497	0.036936	0.158142	0.365098
	average	0.115206	0.156653	0.286189	0.528633
	sd	0.066762	0.0646778	0.0709088	0.177512
Sh-FAM201A	1	0.14698	0.17745	0.210392	0.237578
	2	2017.11.01死亡
	3	2017.10.22死亡
	4	0.087552	0.121838	0.17745	0.26426
	5	2017.11.06死亡
	average	0.117266	0.149644	0.193921	0.250919
	sd	0.0297138	0.0278063	0.016471	0.0133409
