# Supplementary material for: Long Noncoding RNA FAM201A Mediates the Radiosensitivity of Esophageal Squamous Cell Cancer by Regulating ATM and mTOR Expression via miR-101
Source: Front Genet. 2018 Dec 5;9:611. doi: 10.3389/fgene.2018.00611 (PMC6292217; doi:10.3389/fgene.2018.00611)
Supplement: File S1 — Results of lncRNA chip microarray. [file Data_Sheet_1.ZIP › Supplementary File/Supplementary file 5--luciferase/Supplementary file--luciferase activity of miR-101.xls]

## Sheet: Sheet1
		原始荧光值	Luc	NC+WT	miR-101+WT	NC+mut	miR-101+mut
			1	51603	71845	88162	71548
			2	48160	66611	86284	61842
			3	40691	65284	81694	59154
			Rlu	NC+WT	miR-101+WT	NC+mut	miR-101+mut
			1	59036	51548	102641	70248
			2	54284	48153	100624	68624
			3	53215	43615	94860	66618
		荧光校正	Rlu/Luc	NC+WT	miR-101+WT	NC+mut	miR-101+mut
			1	1.14404	0.717489	1.16423	0.98183
			2	1.12716	0.722899	1.1662	1.10967
			3	1.30778	0.668081	1.16116	1.12618
			Ave	1.19299
		相对荧光值		NC+WT	miR-101+WT	NC+mut	miR-101+mut
			1	0.958966	0.601418	0.97589	0.822996
			2	0.944815	0.605953	0.977536	0.930152
			3	1.09622	0.560003	0.973317	0.943993
			Ave	1	0.589125	0.975581	0.899047
			SD	0.0836276	0.0253217	0.00212629	0.0662246
			p值		0.00123659	0.639734	0.176523
				NC	miR-101	SD
			WT	1	0.589125	0.0836276	0.0253217
			MUT	0.975581	0.899047	0.00212629	0.0662246
