# Supplementary material for: Long Noncoding RNA FAM201A Mediates the Radiosensitivity of Esophageal Squamous Cell Cancer by Regulating ATM and mTOR Expression via miR-101
Source: Front Genet. 2018 Dec 5;9:611. doi: 10.3389/fgene.2018.00611 (PMC6292217; doi:10.3389/fgene.2018.00611)
Supplement: File S1 — Results of lncRNA chip microarray. [file Data_Sheet_1.ZIP › Supplementary File/Supplementary file 5--luciferase/Supplementary file--luciferase activity of miR-590.xls]

## Sheet: Sheet1
		原始荧光值	Luc	NC+WT	miR-590+WT	NC+mut	miR-590+mut
			1	82610	75844	72630	99042
			2	75963	72075	70034	95340
			3	72485	68831	62340	90010
			Rlu	NC+WT	miR-590+WT	NC+mut	miR-590+mut
			1	130524	113280	120840	160348
			2	129680	110130	116634	157063
			3	125120	106318	112080	156204
		荧光校正	Rlu/Luc	NC+WT	miR-590+WT	NC+mut	miR-590+mut
			1	1.58	1.49359	1.66378	1.61899
			2	1.70715	1.52799	1.66539	1.6474
			3	1.72615	1.54462	1.79788	1.73541
			Ave	1.6711
		相对荧光值		NC+WT	miR-590+WT	NC+mut	miR-590+mut
			1	0.945487	0.893778	0.995617	0.968817
			2	1.02157	0.914363	0.996584	0.985817
			3	1.03294	0.924316	1.07587	1.03848
			Ave	1	0.910819	1.02269	0.997705
			SD	0.0475512	0.0155743	0.0460563	0.0363222
			p值		0.036679	0.584685	0.95023
				NC	miR-590	SD
			WT	1	0.910819	0.0475512	0.0155743
			MUT	1.02269	0.997705	0.0460563	0.0363222
