# Supplementary material for: Long Noncoding RNA FAM201A Mediates the Radiosensitivity of Esophageal Squamous Cell Cancer by Regulating ATM and mTOR Expression via miR-101
Source: Front Genet. 2018 Dec 5;9:611. doi: 10.3389/fgene.2018.00611 (PMC6292217; doi:10.3389/fgene.2018.00611)
Supplement: File S1 — Results of lncRNA chip microarray. [file Data_Sheet_1.ZIP › Supplementary File/Supplementary file 6/Supplementary file--over:si-FAM201A ATM:mTOR in Eca109.xls]

## Sheet: Results
Sample Name	Target Name	Cт	ΔCт	ΔCт Mean	SD
NC	GAPDH	17.2437
NC	GAPDH	17.4948
NC	GAPDH	17.8092
FAM201A	GAPDH	18.0859
FAM201A	GAPDH	18.8432
FAM201A	GAPDH	18.8893
si-NC	GAPDH	16.7695
si-NC	GAPDH	16.7788
si-NC	GAPDH	16.9528
si-FAM201A	GAPDH	19.3078
si-FAM201A	GAPDH	19.6816
si-FAM201A	GAPDH	19.9728
NC-6Gy	GAPDH	18.0959
NC-6Gy	GAPDH	18.2086
NC-6Gy	GAPDH	18.3869
FAM201A-6Gy	GAPDH	17.2513
FAM201A-6Gy	GAPDH	17.603
FAM201A-6Gy	GAPDH	17.6787
si-NC-6Gy	GAPDH	17.5711
si-NC-6Gy	GAPDH	17.6738
si-NC-6Gy	GAPDH	17.7577
si-FAM201A-6Gy	GAPDH	18.1689
si-FAM201A-6Gy	GAPDH	18.2216
si-FAM201A-6Gy	GAPDH	18.5982
NC	ATM	25.0967	7.85302	7.77527	0.0968029			ΔCт	ΔΔCт	value	SE	P值
NC	ATM	25.1616	7.66685				NC	7.77527	0	1	0.0968029
NC	ATM	25.6151	7.80593				FAM201A	6.8332	-0.942068	1.92128	0.104392	0.00033075
FAM201A	ATM	25.038	6.95202	6.8332	0.104392		si-NC	7.86565	0.0903788	0.939276	0.0790335
FAM201A	ATM	25.5994	6.75621				si-FAM201A	8.37208	0.596817	0.661211	0.124576	0.00401396
FAM201A	ATM	25.6806	6.79137				NC-6Gy	7.13779	-0.637481	1.55561	0.150434
si-NC	ATM	24.5592	7.78972	7.86565	0.0790335		FAM201A-6Gy	6.54824	-1.22703	2.34085	0.121686	0.00618074
si-NC	ATM	24.6386	7.85976				si-NC-6Gy	7.28974	-0.485524	1.40009	0.0818015
si-NC	ATM	24.9003	7.94746				si-FAM201A-6Gy	7.75261	-0.0226623	1.01583	0.0668068	0.00161571
si-FAM201A	ATM	27.7159	8.40811	8.37208	0.124576
si-FAM201A	ATM	28.1562	8.47467
si-FAM201A	ATM	28.2063	8.23347
NC-6Gy	ATM	25.0608	6.96493	7.13779	0.150434
NC-6Gy	ATM	25.4179	7.20932
NC-6Gy	ATM	25.626	7.23911
FAM201A-6Gy	ATM	23.7364	6.48506	6.54824	0.121686
FAM201A-6Gy	ATM	24.0742	6.47113
FAM201A-6Gy	ATM	24.3672	6.68852
si-NC-6Gy	ATM	24.8021	7.23109	7.28974	0.0818015
si-NC-6Gy	ATM	24.9288	7.25496
si-NC-6Gy	ATM	25.1409	7.38319
si-FAM201A-6Gy	ATM	25.9529	7.78403	7.75261	0.0668068
si-FAM201A-6Gy	ATM	26.0195	7.79791
si-FAM201A-6Gy	ATM	26.2741	7.67588
NC	mTOR	22.236	4.9923	5.02187	0.0950119			ΔCт	ΔΔCт	value	SE	P值
NC	mTOR	22.6229	5.12815				NC	5.02187	0	1	0.0950119
NC	mTOR	22.7544	4.94515				FAM201A	3.70762	-1.31425	2.48672	0.120442	0.0001201
FAM201A	mTOR	21.9304	3.84447	3.70762	0.120442		si-NC	4.9242	-0.0976623	1.07004	0.0848134
FAM201A	mTOR	22.5039	3.66065				si-FAM201A	5.4869	0.46503	0.724456	0.0979975	0.00167394
FAM201A	mTOR	22.507	3.61774				NC-6Gy	4.17577	-0.846093	1.79763	0.116297
si-NC	mTOR	21.5975	4.82805	4.9242	0.0848134		FAM201A-6Gy	3.04735	-1.97451	3.92995	0.127562	0.000346834
si-NC	mTOR	21.735	4.95619				si-NC-6Gy	4.31544	-0.706427	1.63176	0.0376953
si-NC	mTOR	21.9412	4.98837				si-FAM201A-6Gy	4.91085	-0.111021	1.07999	0.0900337	0.000454014
si-FAM201A	mTOR	24.9035	5.59567	5.4869	0.0979975
si-FAM201A	mTOR	25.1411	5.45952
si-FAM201A	mTOR	25.3783	5.4055
NC-6Gy	mTOR	22.2549	4.15897	4.17577	0.116297
NC-6Gy	mTOR	22.2774	4.06879
NC-6Gy	mTOR	22.6865	4.29956
FAM201A-6Gy	mTOR	20.2057	2.95436	3.04735	0.127562
FAM201A-6Gy	mTOR	20.5979	2.99492
FAM201A-6Gy	mTOR	20.8715	3.19278
si-NC-6Gy	mTOR	21.9027	4.33166	4.31544	0.0376953
si-NC-6Gy	mTOR	22.0161	4.34231
si-NC-6Gy	mTOR	22.0301	4.27235
si-FAM201A-6Gy	mTOR	23.0554	4.88653	4.91085	0.0900337
si-FAM201A-6Gy	mTOR	23.2321	5.01054
si-FAM201A-6Gy	mTOR	23.4337	4.83546
