# Supplementary material for: Long Noncoding RNA FAM201A Mediates the Radiosensitivity of Esophageal Squamous Cell Cancer by Regulating ATM and mTOR Expression via miR-101
Source: Front Genet. 2018 Dec 5;9:611. doi: 10.3389/fgene.2018.00611 (PMC6292217; doi:10.3389/fgene.2018.00611)
Supplement: File S1 — Results of lncRNA chip microarray. [file Data_Sheet_1.ZIP › Supplementary File/Supplementary file 6/Supplementary file--over:si-FAM201A ATM:mTOR in Eca109R.xls]

## Sheet: Results
Sample Name	Target Name	Cт	ΔCт	ΔCт Mean	SD
NC	GAPDH	18.501
NC	GAPDH	18.7133
NC	GAPDH	18.9555
FAM201A	GAPDH	19.0427
FAM201A	GAPDH	19.4218
FAM201A	GAPDH	19.5083
si-NC	GAPDH	18.2779
si-NC	GAPDH	18.4732
si-NC	GAPDH	18.6136
si-FAM201A	GAPDH	18.4898
si-FAM201A	GAPDH	18.7566
si-FAM201A	GAPDH	18.6807
NC-6Gy	GAPDH	19.4212
NC-6Gy	GAPDH	19.7122
NC-6Gy	GAPDH	19.9801
FAM201A-6Gy	GAPDH	19.0728
FAM201A-6Gy	GAPDH	19.1773
FAM201A-6Gy	GAPDH	19.442
si-NC-6Gy	GAPDH	17.5397
si-NC-6Gy	GAPDH	17.8485
si-NC-6Gy	GAPDH	17.9639
si-FAM201A-6Gy	GAPDH	18.522
si-FAM201A-6Gy	GAPDH	18.6099
si-FAM201A-6Gy	GAPDH	18.9167
NC	ATM	26.4045	7.90345	7.75251	0.140775			ΔCт	ΔΔCт	value	SD	P值
NC	ATM	26.4425	7.72927				NC	7.75251	0	1	0.140775
NC	ATM	26.5803	7.6248				FAM201A	7.21186	-0.540646	1.45462	0.0701827	0.00399564
FAM201A	ATM	26.3152	7.27258	7.21186	0.0701827		si-NC	8.02857	0.276066	0.82584	0.0585878
FAM201A	ATM	26.5568	7.13502				si-FAM201A	8.49621	0.743703	0.597204	0.143796	0.0064432
FAM201A	ATM	26.7363	7.22798				NC-6Gy	7.46013	-0.292372	1.22465	0.12409
si-NC	ATM	26.3274	8.04947	8.02857	0.0585878		FAM201A-6Gy	6.44121	-1.3113	2.48165	0.108131	0.000428747
si-NC	ATM	26.4356	7.9624				si-NC-6Gy	7.60523	-0.147274	1.10748	0.114608
si-NC	ATM	26.6875	8.07385				si-FAM201A-6Gy	8.66562	0.913114	0.531038	0.131751	0.000462093
si-FAM201A	ATM	26.8743	8.38447	8.49621	0.143796
si-FAM201A	ATM	27.2023	8.44571
si-FAM201A	ATM	27.3391	8.65844
NC-6Gy	ATM	26.9481	7.5269	7.46013	0.12409
NC-6Gy	ATM	27.2487	7.53655
NC-6Gy	ATM	27.2971	7.31695
FAM201A-6Gy	ATM	25.3919	6.31918	6.44121	0.108131
FAM201A-6Gy	ATM	25.6566	6.47933
FAM201A-6Gy	ATM	25.9671	6.52511
si-NC-6Gy	ATM	25.0145	7.47482	7.60523	0.114608
si-NC-6Gy	ATM	25.4994	7.65093
si-NC-6Gy	ATM	25.6538	7.68994
si-FAM201A-6Gy	ATM	27.0782	8.55611	8.66562	0.131751
si-FAM201A-6Gy	ATM	27.4217	8.81183
si-FAM201A-6Gy	ATM	27.5457	8.62892
NC	mTOR	23.581	5.08002	5.1968	0.102544			ΔCт	ΔΔCт	value	SD	P值
NC	mTOR	23.9854	5.27217				NC	5.1968	0	1	0.102544
NC	mTOR	24.1937	5.23819				FAM201A	4.54962	-0.647171	1.56609	0.154316	0.00376627
FAM201A	mTOR	23.4206	4.37795	4.54962	0.154316		si-NC	5.34268	0.145888	0.903823	0.0941973
FAM201A	mTOR	24.0986	4.67679				si-FAM201A	5.80849	0.611696	0.654427	0.135234	0.00807038
FAM201A	mTOR	24.1025	4.59413				NC-6Gy	4.9565	-0.240292	1.18123	0.0600261
si-NC	mTOR	23.6101	5.33219	5.34268	0.0941973		FAM201A-6Gy	4.04885	-1.14795	2.21598	0.0654001	5.97226e-05
si-NC	mTOR	23.7274	5.25417				si-NC-6Gy	5.23132	0.034522	0.976355	0.0159127
si-NC	mTOR	24.0553	5.44169				si-FAM201A-6Gy	5.43492	0.23812	0.847849	0.0969007	0.022939
si-FAM201A	mTOR	24.345	5.85518	5.80849	0.135234
si-FAM201A	mTOR	24.4127	5.6561
si-FAM201A	mTOR	24.5949	5.91419
NC-6Gy	mTOR	24.3838	4.96262	4.9565	0.0600261
NC-6Gy	mTOR	24.7254	5.01324
NC-6Gy	mTOR	24.8738	4.89365
FAM201A-6Gy	mTOR	23.1958	4.12303	4.04885	0.0654001
FAM201A-6Gy	mTOR	23.2013	4.02402
FAM201A-6Gy	mTOR	23.4415	3.9995
si-NC-6Gy	mTOR	22.7761	5.23642	5.23132	0.0159127
si-NC-6Gy	mTOR	23.0925	5.24405
si-NC-6Gy	mTOR	23.1774	5.21348
si-FAM201A-6Gy	mTOR	23.8763	5.35428	5.43492	0.0969007
si-FAM201A-6Gy	mTOR	24.0179	5.40805
si-FAM201A-6Gy	mTOR	24.4591	5.54241
