# Supplementary material for: Long Noncoding RNA FAM201A Mediates the Radiosensitivity of Esophageal Squamous Cell Cancer by Regulating ATM and mTOR Expression via miR-101
Source: Front Genet. 2018 Dec 5;9:611. doi: 10.3389/fgene.2018.00611 (PMC6292217; doi:10.3389/fgene.2018.00611)
Supplement: File S1 — Results of lncRNA chip microarray. [file Data_Sheet_1.ZIP › Supplementary File/Supplementary file 6/Supplementary file--over:si-FAM201A on miR101 in Eca109.xls]

## Sheet: Results
Sample Name	Target Name	Cт	ΔCт	ΔCт Mean	SD
NC	U6	16.3831
NC	U6	16.4479
NC	U6	16.8456
FAM201A	U6	15.3419
FAM201A	U6	15.4772
FAM201A	U6	15.7733
si-NC	U6	17.4003
si-NC	U6	17.4166
si-NC	U6	17.7632
si-FAM201A	U6	16.5632
si-FAM201A	U6	16.6932
si-FAM201A	U6	16.8952
NC-6Gy	U6	16.4654
NC-6Gy	U6	16.7916
NC-6Gy	U6	16.9352
FAM201A-6Gy	U6	18.4576
FAM201A-6Gy	U6	18.5809
FAM201A-6Gy	U6	18.782
si-NC-6Gy	U6	15.4144
si-NC-6Gy	U6	15.558
si-NC-6Gy	U6	15.6096
si-FAM201A-6Gy	U6	17.6315
si-FAM201A-6Gy	U6	17.6502
si-FAM201A-6Gy	U6	17.834
NC	miR-101	21.0409	4.65785	4.70238	0.0387635			ΔCт	ΔΔCт	value	SD	P值
NC	miR-101	21.1765	4.72857				NC	4.70238	0	1	0.0387635
NC	miR-101	21.5663	4.72072				FAM201A	6.11546	1.41308	0.375509	0.0250968	7.58531e-07
FAM201A	miR-101	21.4785	6.13661	6.11546	0.0250968		si-NC	4.64355	-0.0588339	1.04162	0.134496
FAM201A	miR-101	21.5993	6.12204				si-FAM201A	3.61127	-1.09111	2.13038	0.12779	0.000648311
FAM201A	miR-101	21.861	6.08773				NC-6Gy	5.04683	0.344449	0.787609	0.0880161
si-NC	miR-101	21.8976	4.49724	4.64355	0.134496		FAM201A-6Gy	6.4907	1.78832	0.289509	0.0622644	2.04702e-05
si-NC	miR-101	22.0882	4.67159				si-NC-6Gy	5.22006	0.517683	0.698493	0.120802
si-NC	miR-101	22.525	4.76181				si-FAM201A-6Gy	3.93854	-0.763838	1.698	0.0998214	0.000144238
si-FAM201A	miR-101	20.0672	3.50406	3.61127	0.12779
si-FAM201A	miR-101	20.4459	3.75268
si-FAM201A	miR-101	20.4723	3.57706
NC-6Gy	miR-101	21.4111	4.94568	5.04683	0.0880161
NC-6Gy	miR-101	21.8804	5.0888
NC-6Gy	miR-101	22.0412	5.106
FAM201A-6Gy	miR-101	24.9915	6.53387	6.4907	0.0622644
FAM201A-6Gy	miR-101	25.0002	6.41932
FAM201A-6Gy	miR-101	25.3009	6.5189
si-NC-6Gy	miR-101	20.4985	5.08403	5.22006	0.120802
si-NC-6Gy	miR-101	20.8194	5.26135
si-NC-6Gy	miR-101	20.9244	5.31481
si-FAM201A-6Gy	miR-101	21.4636	3.83204	3.93854	0.0998214
si-FAM201A-6Gy	miR-101	21.6038	3.95362
si-FAM201A-6Gy	miR-101	21.864	4.02997
