# Supplementary material for: Long Noncoding RNA FAM201A Mediates the Radiosensitivity of Esophageal Squamous Cell Cancer by Regulating ATM and mTOR Expression via miR-101
Source: Front Genet. 2018 Dec 5;9:611. doi: 10.3389/fgene.2018.00611 (PMC6292217; doi:10.3389/fgene.2018.00611)
Supplement: File S1 — Results of lncRNA chip microarray. [file Data_Sheet_1.ZIP › Supplementary File/Supplementary file 6/Supplementary file--overe:si-FAM201A on miR101 in Eca109R.xls]

## Sheet: Results
Sample Name	Target Name	Cт	ΔCт	ΔCт Mean	SD
NC	U6	20.2549
NC	U6	20.5281
NC	U6	20.6811
FAM201A	U6	18.6739
FAM201A	U6	18.9402
FAM201A	U6	18.9478
si-NC	U6	19.158
si-NC	U6	19.8192
si-NC	U6	19.9898
si-FAM201A	U6	19.1095
si-FAM201A	U6	19.2545
si-FAM201A	U6	19.5069
NC-6Gy	U6	18.6184
NC-6Gy	U6	18.8816
NC-6Gy	U6	18.8885
FAM201A-6Gy	U6	19.3133
FAM201A-6Gy	U6	19.6143
FAM201A-6Gy	U6	19.729
si-NC-6Gy	U6	20.3964
si-NC-6Gy	U6	20.5582
si-NC-6Gy	U6	20.6482
si-FAM201A-6Gy	U6	19.2059
si-FAM201A-6Gy	U6	19.338
si-FAM201A-6Gy	U6	19.5396
NC	miR-101	25.2202	4.96528	4.84513	0.10408			ΔCт	ΔΔCт	value	SD	P值
NC	miR-101	25.3108	4.7827				NC	4.84513	0	1	0.10408
NC	miR-101	25.4685	4.78741				FAM201A	5.65224	0.807112	0.571525	0.11948	0.000910936
FAM201A	miR-101	24.1932	5.5193	5.65224	0.11948		si-NC	4.87679	0.0316611	0.978293	0.0558647
FAM201A	miR-101	24.627	5.68678				si-FAM201A	3.96868	-0.876449	1.83585	0.0894116	0.000117571
FAM201A	miR-101	24.6984	5.75065				NC-6Gy	5.22918	0.384052	0.766282	0.117633
si-NC	miR-101	24.0578	4.89979	4.87679	0.0558647		FAM201A-6Gy	5.81873	0.973595	0.509236	0.0118709	0.00098837
si-NC	miR-101	24.6323	4.8131				si-NC-6Gy	5.09884	0.253708	0.838738	0.0474621
si-NC	miR-101	24.9073	4.91749				si-FAM201A-6Gy	4.33894	-0.506191	1.42029	0.0431387	3.33031e-05
si-FAM201A	miR-101	23.0814	3.97193	3.96868	0.0894116
si-FAM201A	miR-101	23.1322	3.87769
si-FAM201A	miR-101	23.5633	4.05642
NC-6Gy	miR-101	23.7779	5.15955	5.22918	0.117633
NC-6Gy	miR-101	24.0446	5.16299
NC-6Gy	miR-101	24.2535	5.365
FAM201A-6Gy	miR-101	25.1214	5.80809	5.81873	0.0118709
FAM201A-6Gy	miR-101	25.4308	5.81656
FAM201A-6Gy	miR-101	25.5606	5.83153
si-NC-6Gy	miR-101	25.5184	5.12197	5.09884	0.0474621
si-NC-6Gy	miR-101	25.6024	5.04424
si-NC-6Gy	miR-101	25.7785	5.1303
si-FAM201A-6Gy	miR-101	23.5365	4.33052	4.33894	0.0431387
si-FAM201A-6Gy	miR-101	23.6386	4.30063
si-FAM201A-6Gy	miR-101	23.9252	4.38567
